# Supplementary material for: A Protein Misfolding Shaking Amplification-based method for the spontaneous generation of hundreds of bona fide prions
Source: Springer Nature journal article supplement (doi:10.1038/s41467-024-46360-2), 2024-03-08

# Cape golden mole

GenBank: XM\_006870413

P36%

2.9

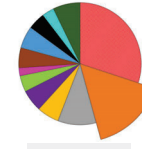

0-10

## *Chrysochloris asiatica*

Afrosoricida 1/4

Chrysochloridae 1/1

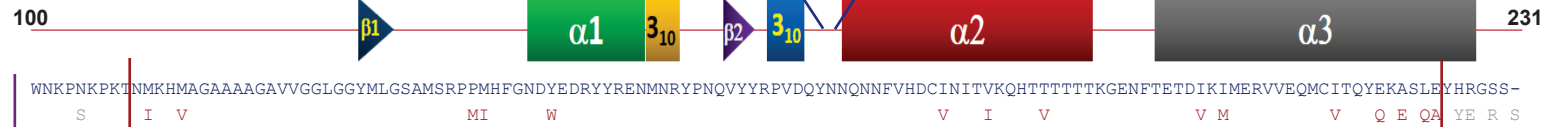

PrP sequence differs by 15 amino acids from the bank vole PrP (see in red)

- No deletions
- No insertions
- No polymorphic variants found

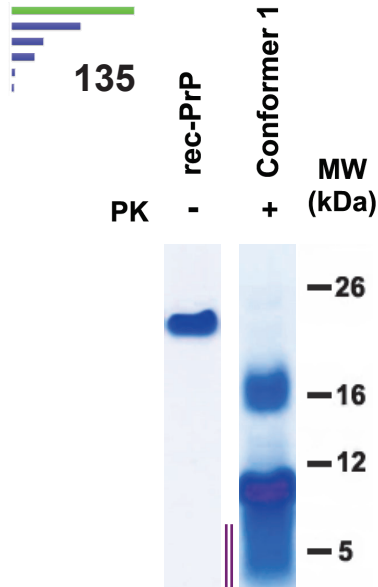

204 AA

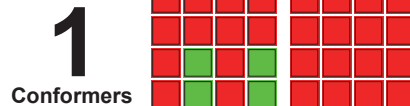

Tm<sup>Exp</sup>: ND

ΔΔG: ND

### *In vitro* studies

TgVole (1x) Not tested

Cape golden mole Not tested

### *In vivo* studies

TgVole (1x) Not tested

Cape golden mole Not tested

pLDDT [89.33]

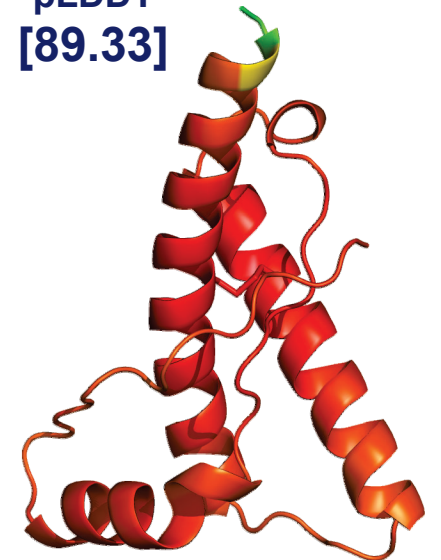

1 species sharing the same primary sequence

Hottentot golden mole  
*Amblysomus hottentotus*

# Lesser hedgehog tenrec

GenBank: **BK064944**

P29%

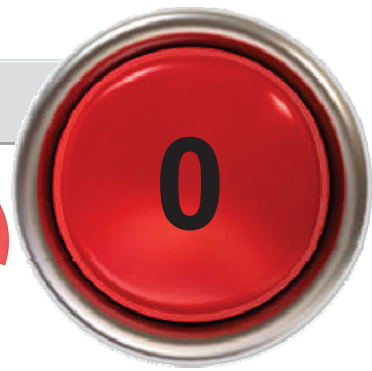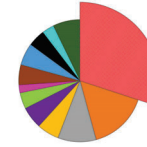

0

## *Echinops telfairi*

Afrosoricida 1/4  
Tenrecidae 0/3

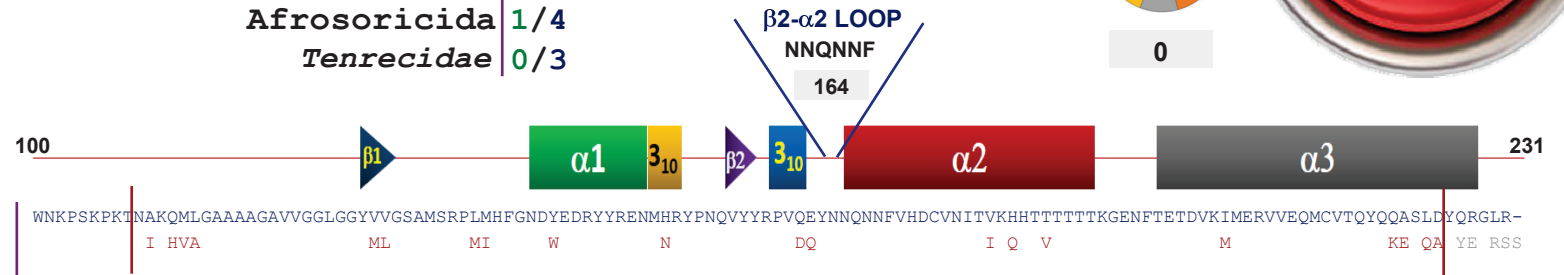

PrP sequence differs by 20 amino acids from the bank vole PrP (see in red)

No deletions  
No insertions  
No polymorphic variants found

$T_m^{Exp}$ : ND  
 $\Delta\Delta G$ : ND

Distinct primary sequence across species

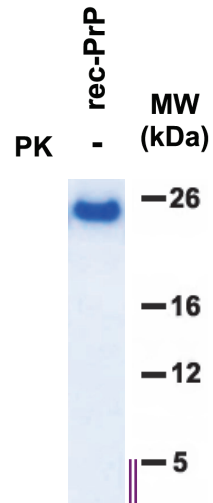

233 AA

0  
Conformers

**NO  
MISFOLDING**

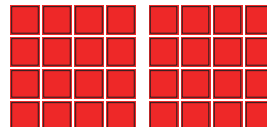

*In vitro* studies

**NOT  
APPLICABLE**

*In vivo* studies

**NOT  
APPLICABLE**

pLDDT  
[92.61]

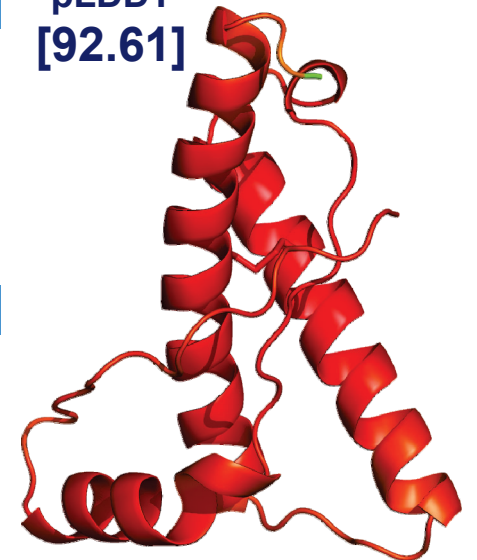

# Talazac's shrew tenrec

GenBank: [BK063959](#)

P29%

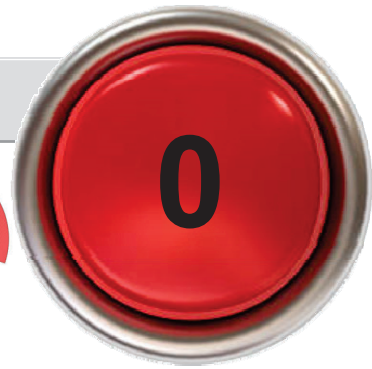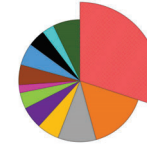

0

## *Microgale talazaci*

Afrosoricida 1/4  
Tenrecidae 0/3

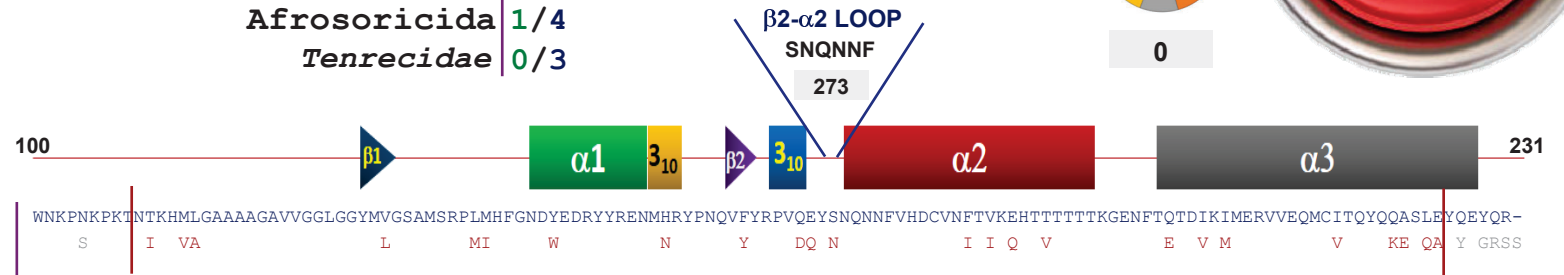

PrP sequence differs by 24 amino acids from the bank vole PrP (see in red)

- No deletions
- No insertions
- No polymorphic variants found

$T_m^{Exp}$ : ND  
 $\Delta\Delta G$ : ND

Distinct primary sequence across species

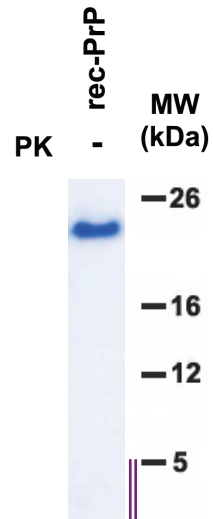

214 AA

0  
Conformers

**NO MISFOLDING**

*In vitro* studies

**NOT APPLICABLE**

*In vivo* studies

**NOT APPLICABLE**

pLDDT [96.16]

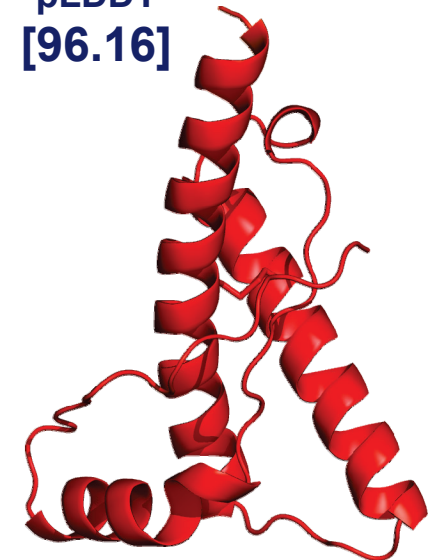

# Tailless tenrec

GenBank: AY133060

P29%



0

## Tenrec ecaudatus

Afrosoricida 1/4  
Tenrecidae 0/3

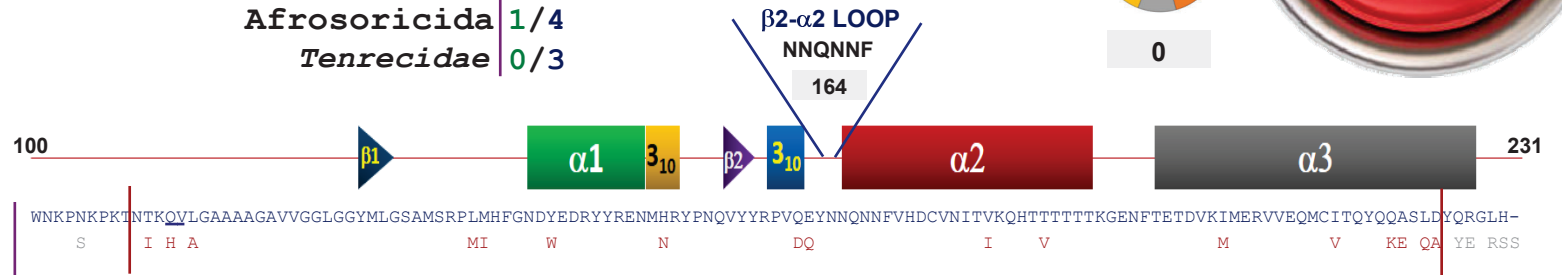

PrP sequence differs by 17 amino acids from the bank vole PrP (see in red)

No deletions  
No insertions  
No polymorphic variants found

Tm<sup>Exp</sup>: ND  
ΔΔG: ND

Distinct primary sequence across species

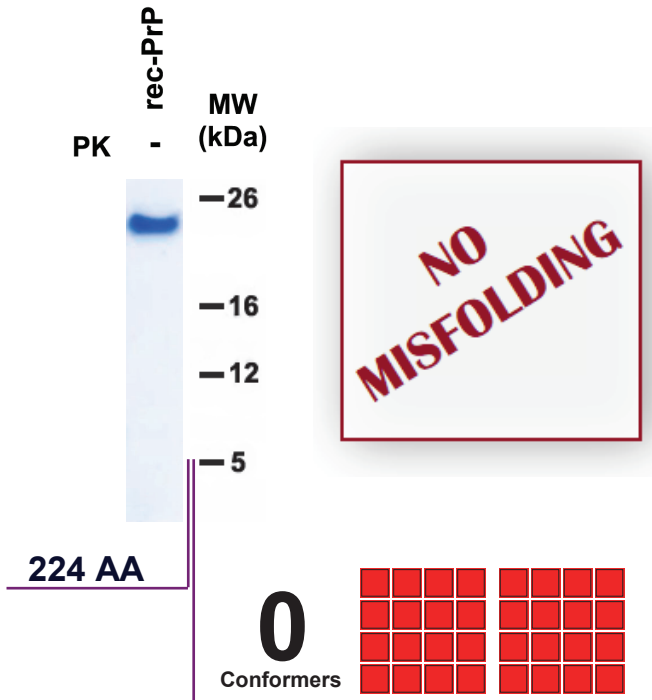

**NO MISFOLDING**

*In vitro* studies

**NOT APPLICABLE**

*In vivo* studies

**NOT APPLICABLE**

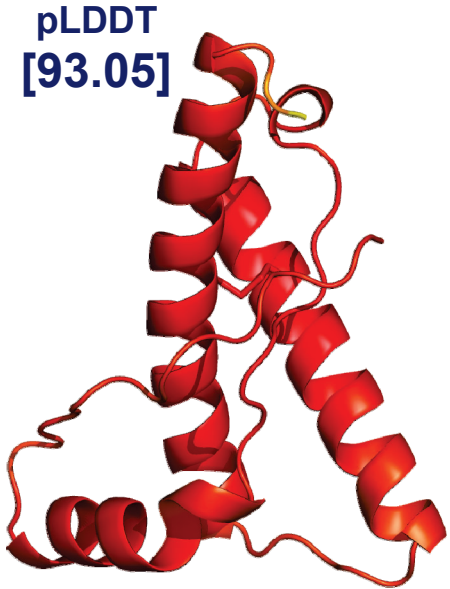

# Mongolian gazelle

GenBank: AB473615

P39%

3.6



0-10

## *Procapra gutturosa*

Artiodactyla 46/50

Bovidae 26/30

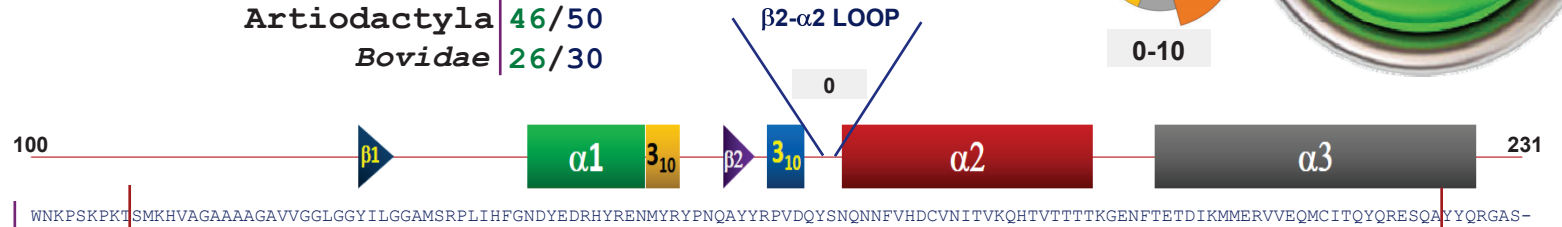

PrP sequence differs by 0 amino acids from the bank vole PrP (see in red)

No deletions  
No insertions  
It shows polymorphic variants

Distinct primary sequence across species

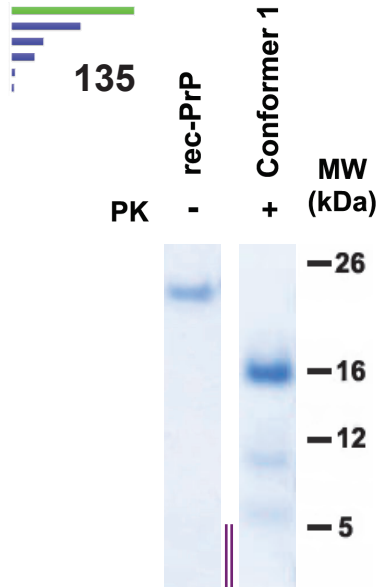

220 AA

1

Conformers

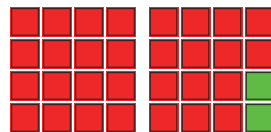

$T_m^{Exp}$ : ND

$\Delta\Delta G$ : -9.58

### *In vitro* studies

TgVole (1x) Not tested

Mongolian gazelle Not tested

### *In vivo* studies

TgVole (1x) Not tested

Mongolian gazelle Not tested

pLDDT [88.8]

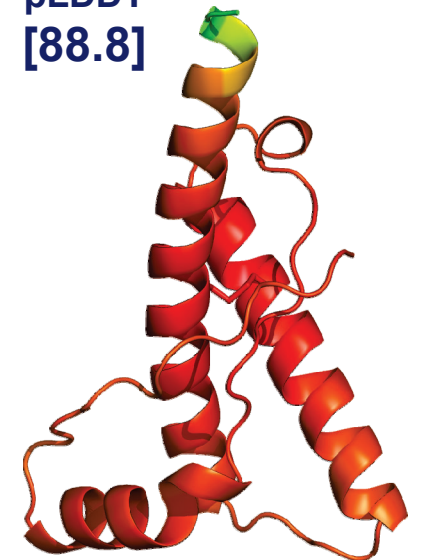

Distinct primary sequence across species

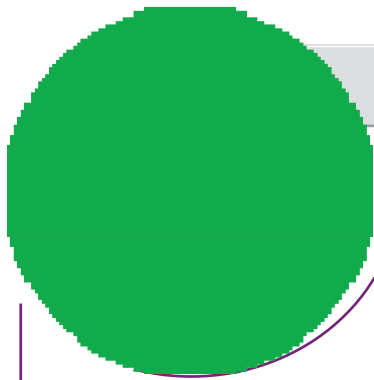

# Impala

GenBank: [BK063929](#)

## *Aepyceros melampus*

Artiodactyla 46/50  
Bovidae 26/30

P77%

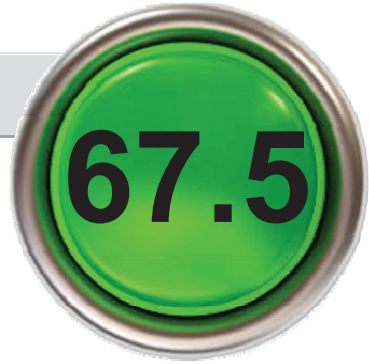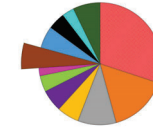

60-70

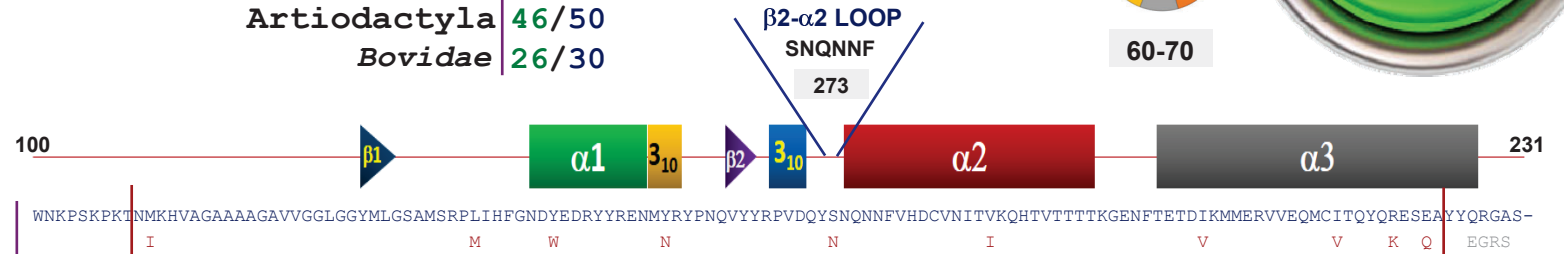

PrP sequence differs by 10 amino acids from the bank vole PrP (see in red)

- No deletions
- No insertions
- No polymorphic variants found

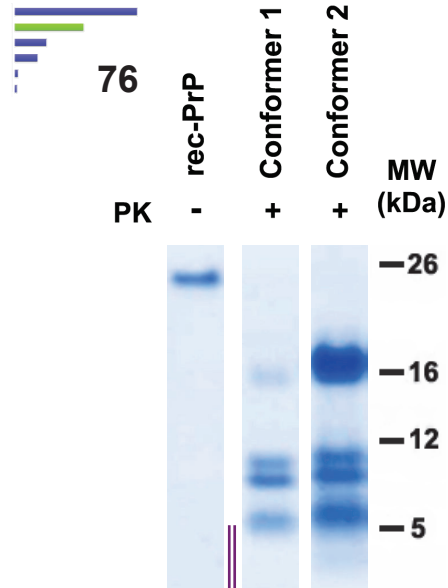

220 AA

2 Conformers

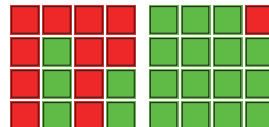

$T_m^{Exp}$ : ND

$\Delta\Delta G$ : -14.79

### *In vitro* studies

|             |            |
|-------------|------------|
| TgVole (1x) | Not tested |
| Impala      | Not tested |

### *In vivo* studies

|             |            |
|-------------|------------|
| TgVole (1x) | Not tested |
| Impala      | Not tested |

pLDDT [87.37]

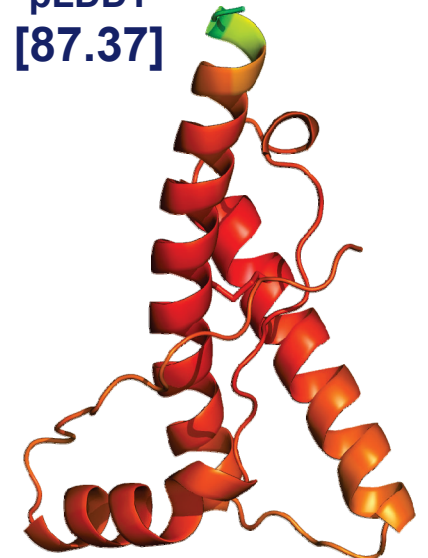

# Pronghorn

GenBank: AF156187

P55%

19.6

## *Antilocapra americana*

Artiodactyla 46/50  
Antilocapridae 1/1

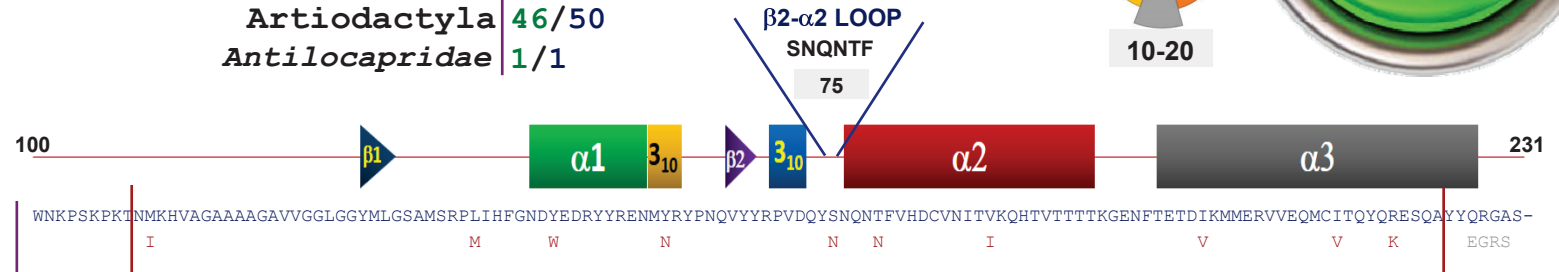

PrP sequence differs by 10 amino acids from the bank vole PrP (see in red)

No deletions  
No insertions  
No polymorphic variants found

Distinct primary sequence across species

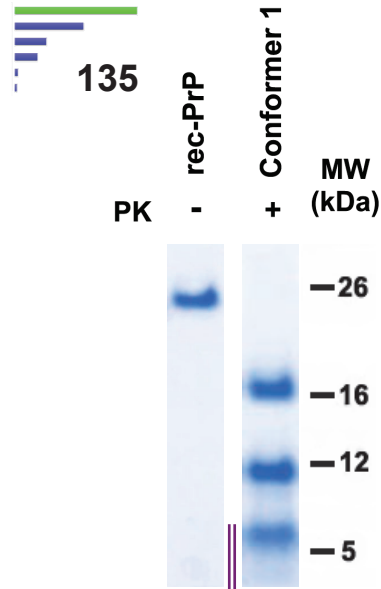

220 AA

1  
Conformers

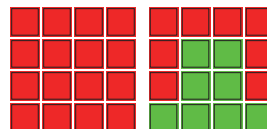

Tm<sup>Exp</sup>: ND

ΔΔG: -12.73

### *In vitro* studies

TgVole (1x) Not tested

Pronghorn Not tested

### *In vivo* studies

TgVole (1x) Not tested

Pronghorn Not tested

pLDDT [86.38]

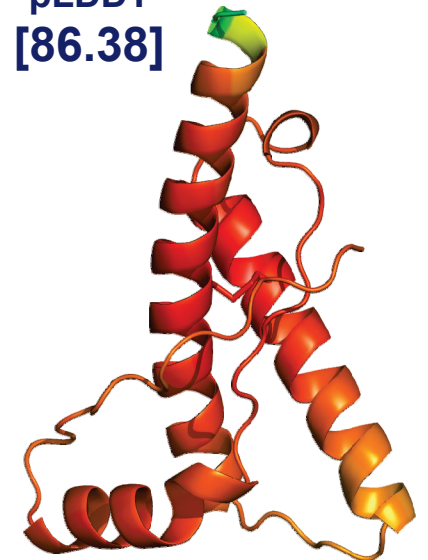

# Blackbuck

GenBank: AY720706

P75%

62.5

## *Antilope cervicapra*

Artiodactyla 46/50  
Bovidae 26/30

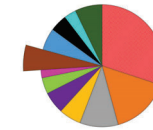

60-70

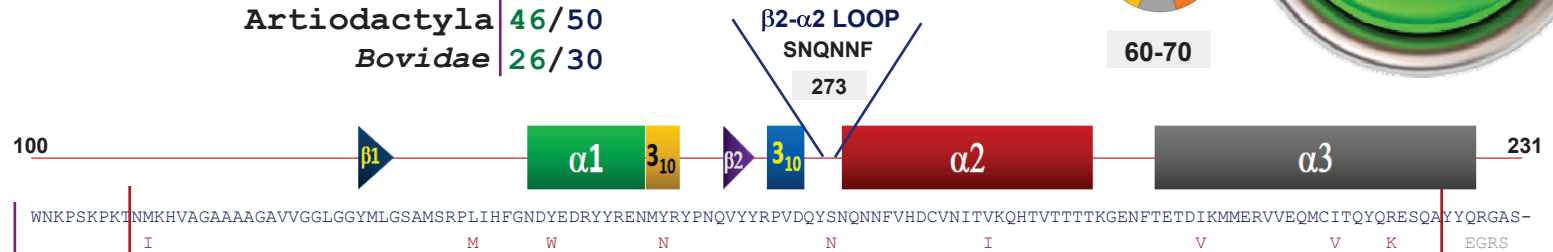

PrP sequence differs by 9 amino acids from the bank vole PrP (see in red)

No deletions  
No insertions  
No polymorphic variants found

7 species sharing the same primary sequence

- Springbok *Antidorcas marsupialis*
- Thomson's gazelle *Eudorcas thomsonii*
- Dorcas gazelle *Gazella dorcas*
- Goitered gazelle *Gazella subgutturosa*
- Dama gazelle *Nanger dama*
- Grant's gazelle *Nanger granti*
- Przewalski's gazelle *Procapra przewalskii*

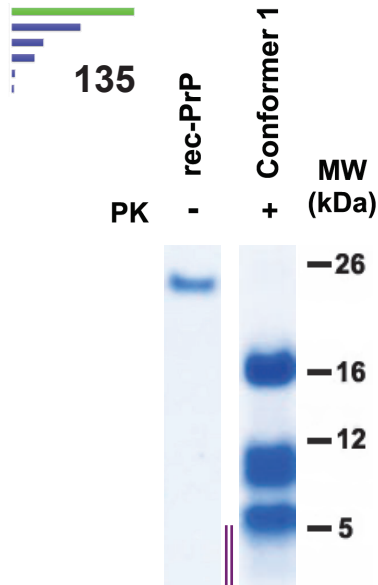

220 AA

1  
Conformers

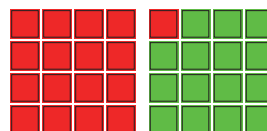

Tm<sup>Exp</sup>: ND

ΔΔG: -12.66

### In vitro studies

TgVole (1x) Not tested

Blackbuck Not tested

### In vivo studies

TgVole (1x) Not tested

Blackbuck Not tested

pLDDT [89.11]

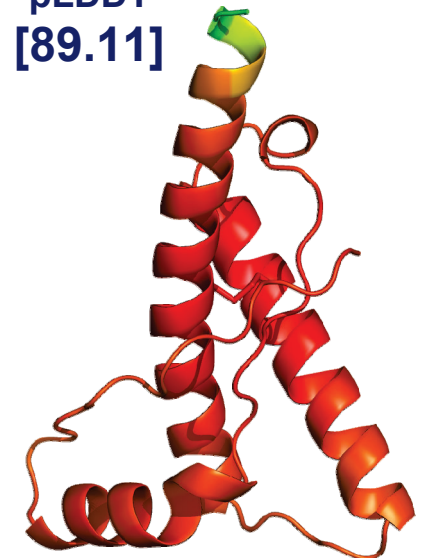



# North Sulawesi babirusa

GenBank: **BK064782**

P63%

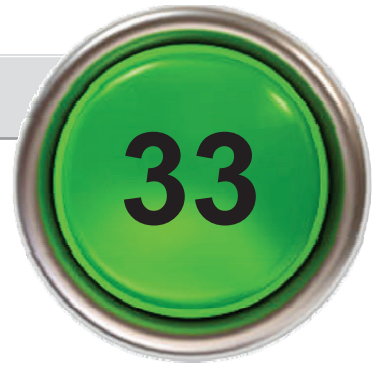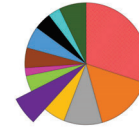

## Babyrousa celebensis

Artiodactyla 46/50  
Suidae 3/3

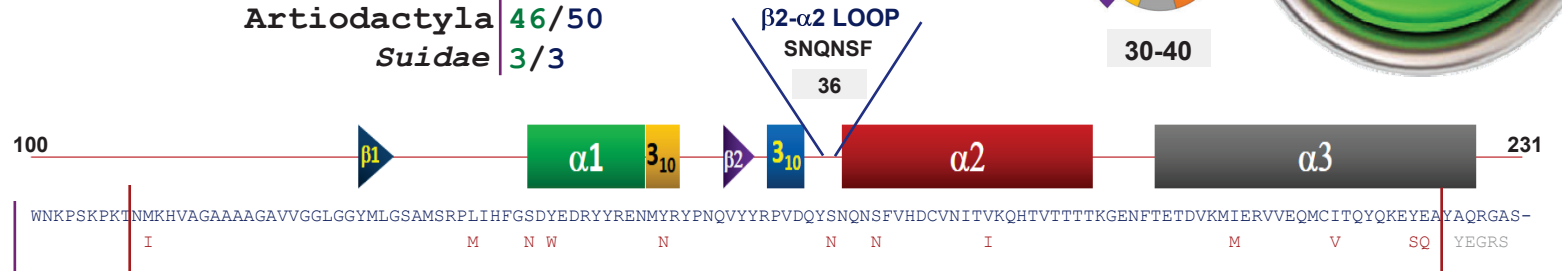

PrP sequence differs by 12 amino acids from the bank vole PrP (see in red)

- No deletions
- No insertions
- No polymorphic variants found

Distinct primary sequence across species

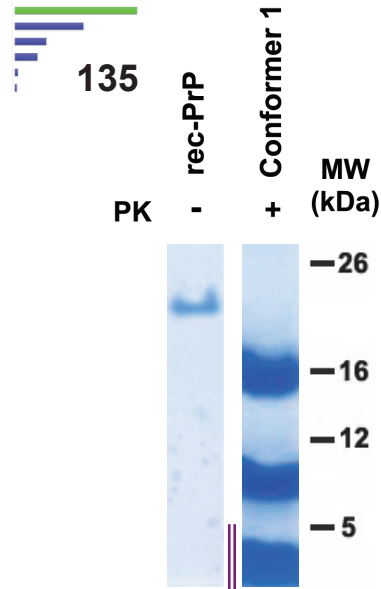

213 AA

1  
Conformers

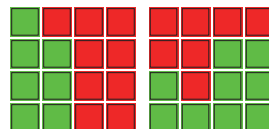

Tm<sup>Exp</sup>: ND

ΔΔG: -12.04

### *In vitro* studies

TgVole (1x) Not tested

North Sulawesi babirusa Not tested

### *In vivo* studies

TgVole (1x) Not tested

North Sulawesi babirusa Not tested

pLDDT  
[87.69]

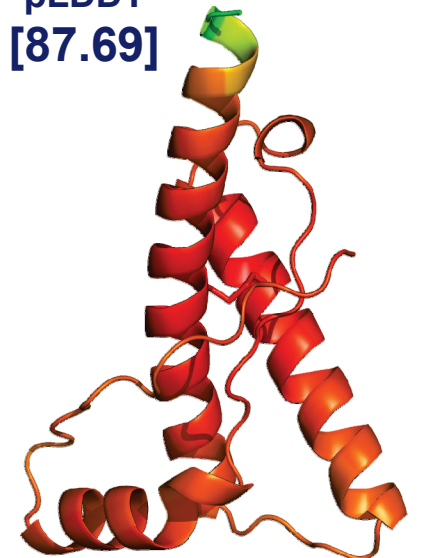

# Domestic yak

GenBank: KC137646

P69%

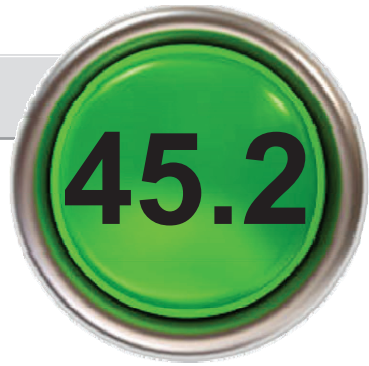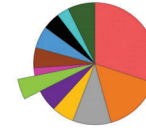

40-50

## *Bos grunniens*

Artiodactyla 46/50  
Bovidae 26/30

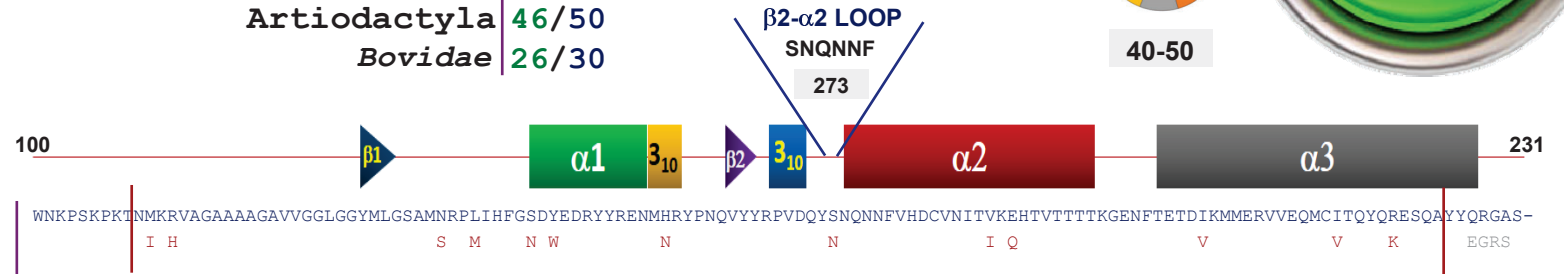

PrP sequence differs by 13 amino acids from the bank vole PrP (see in red)

No deletions  
No insertions  
It shows polymorphic variants

Distinct primary sequence across species

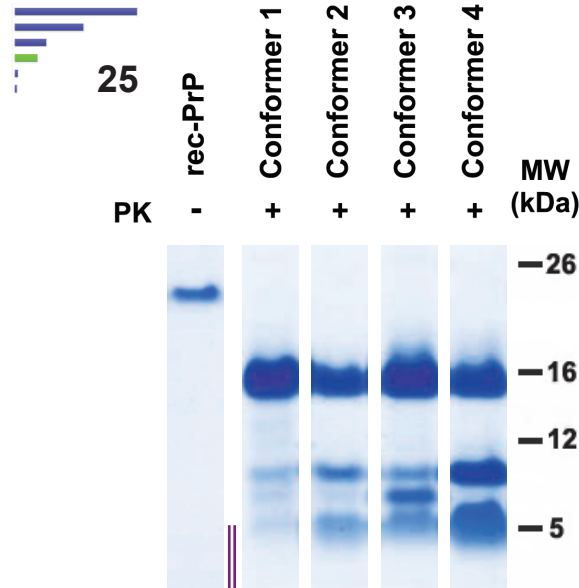

220 AA

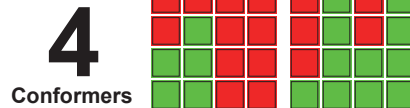

Tm<sup>Exp</sup>: ND  
 $\Delta\Delta G$ : -4.17

### *In vitro* studies

TgVole (1x) Not tested  
Domestic yak Not tested

### *In vivo* studies

TgVole (1x) Not tested  
Domestic yak Not tested

pLDDT [88.15]

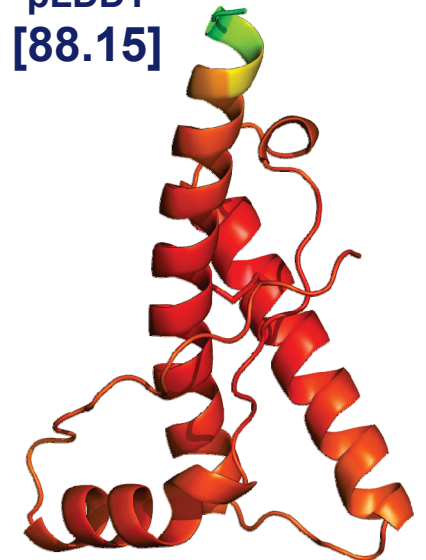

4 species sharing the same primary sequence

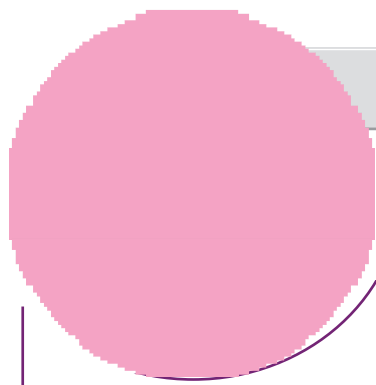

**Cow**

GenBank: NM\_181015

P48%

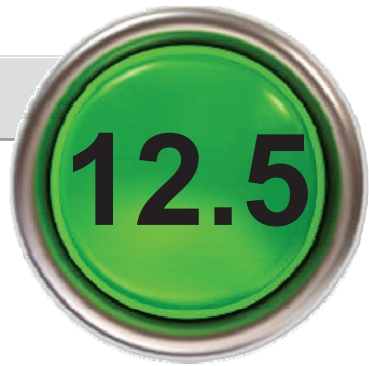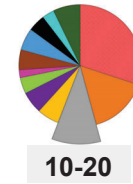

*Bos taurus*

Artiodactyla 46/50  
Bovidae 26/30

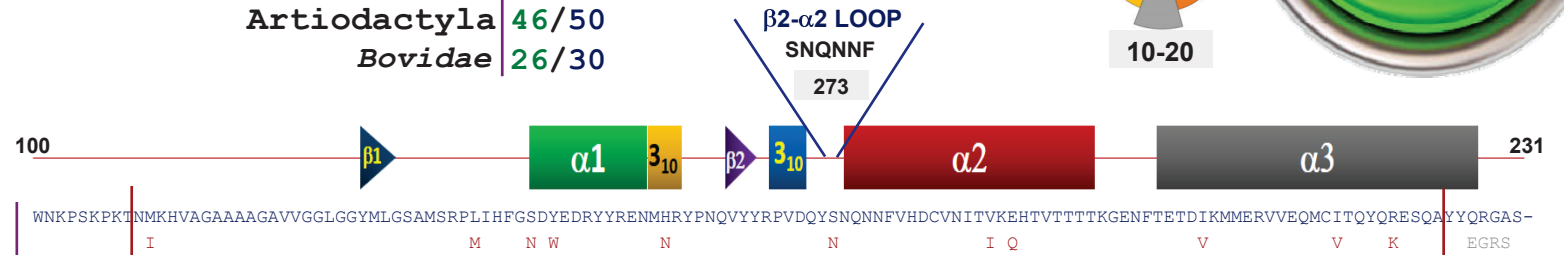

PrP sequence differs by 11 amino acids from the bank vole PrP (see in red)

No deletions  
No insertions  
It shows polymorphic variants

- American bison *Bison bison*
- European bison *Bison bonasus*
- Gayal *Bos frontalis*
- Banteng *Bos javanicus*

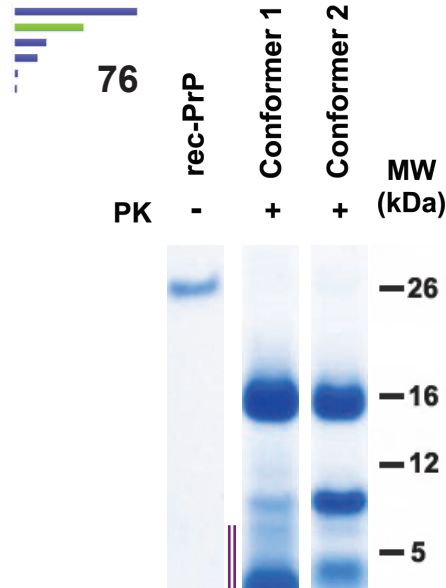

220 AA

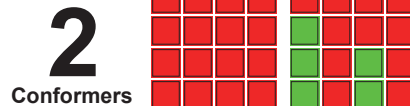

Tm<sup>Exp</sup>: ND

ΔΔG: -10.33

*In vitro* studies

TgVole (1x) Propagate

Cow Propagate

*In vivo* studies

TgVole (1x) Infectious

TgCow Not tested

pLDDT [89.11]

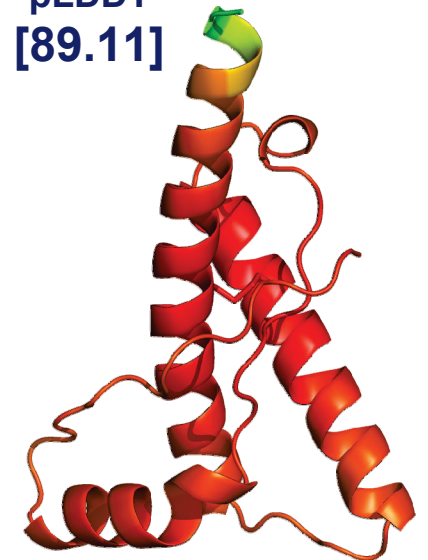

Distinct primary sequence across species

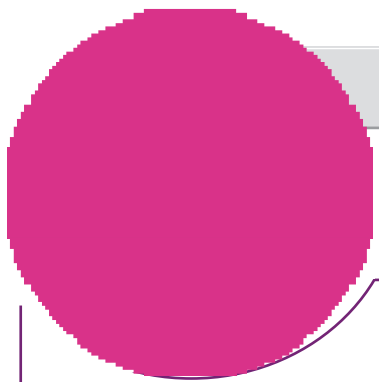

# Nilgai

GenBank: AY720700

P88%

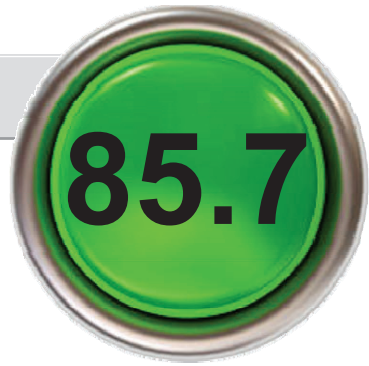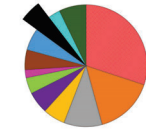

80-90

## *Boselaphus tragocamelus*

Artiodactyla 46/50  
Bovidae 26/30

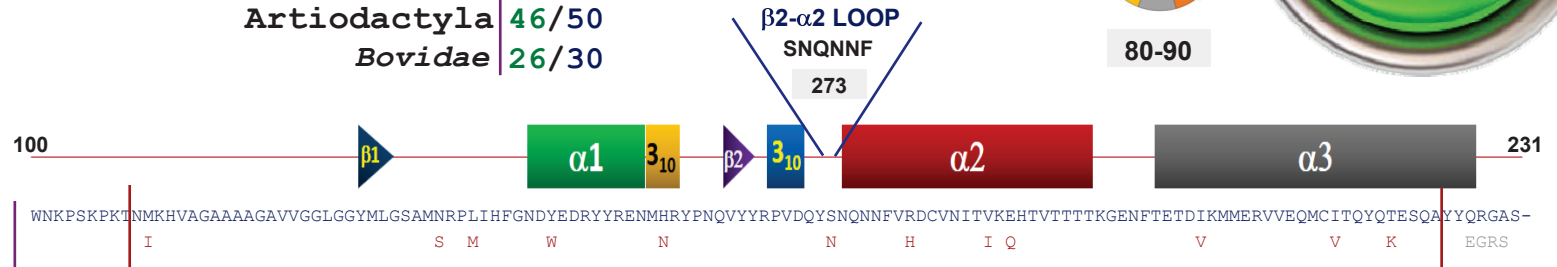

PrP sequence differs by 12 amino acids from the bank vole PrP (see in red)

- No deletions
- No insertions
- No polymorphic variants found

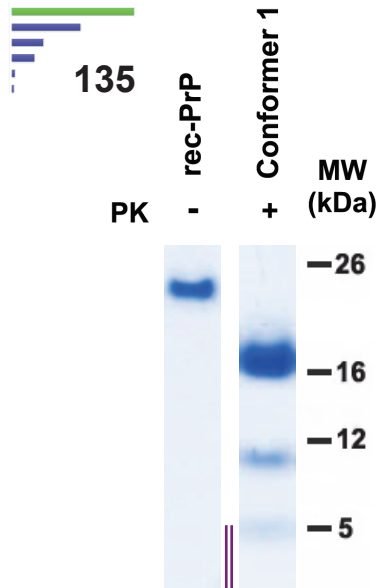

220 AA

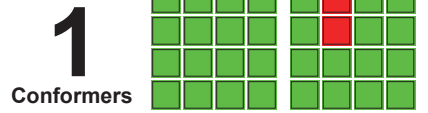

Tm<sup>Exp</sup>: ND  
ΔΔG: -7.53

### *In vitro* studies

|             |            |
|-------------|------------|
| TgVole (1x) | Not tested |
| Nilgai      | Not tested |

### *In vivo* studies

|             |            |
|-------------|------------|
| TgVole (1x) | Not tested |
| Nilgai      | Not tested |

pLDDT [89.06]

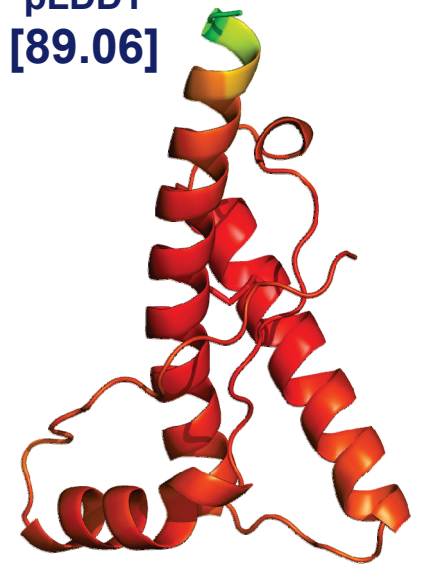

# Water buffalo

GenBank: MK342630

P51%

16.1

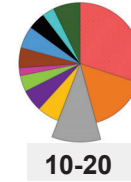

## *Bubalus bubalis*

Artiodactyla 46/50  
Bovidae 26/30

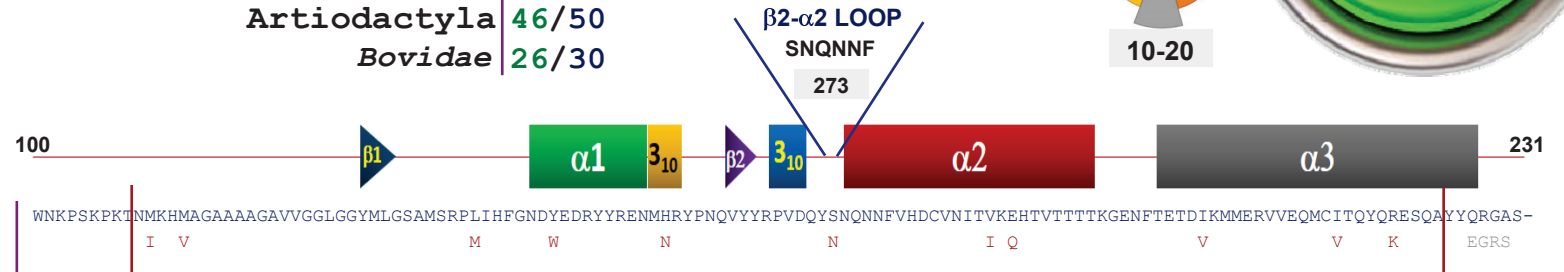

PrP sequence differs by 11 amino acids from the bank vole PrP (see in red)

No deletions  
No insertions  
It shows polymorphic variants

Distinct primary sequence across species

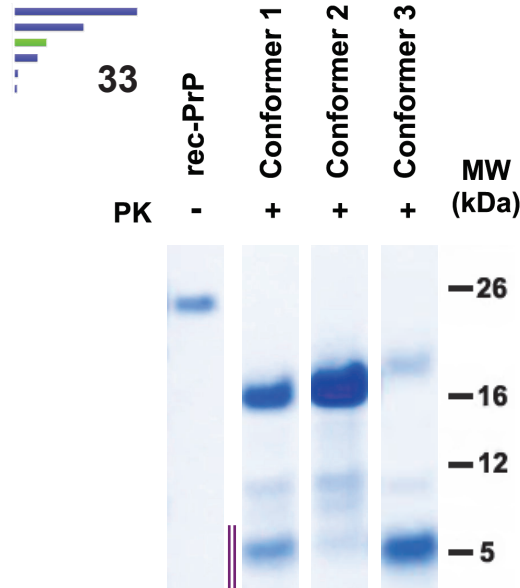

220 AA

3  
Conformers

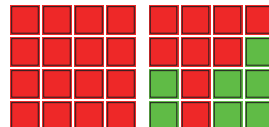

Tm<sup>Exp</sup>: ND

ΔΔG: -12.88

### *In vitro* studies

|               |            |
|---------------|------------|
| TgVole (1x)   | Not tested |
| Water buffalo | Not tested |

### *In vivo* studies

|               |            |
|---------------|------------|
| TgVole (1x)   | Not tested |
| Water buffalo | Not tested |

pLDDT  
[89.18]

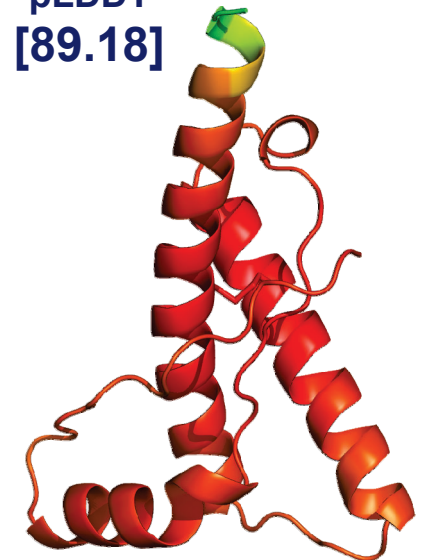

Distinct primary sequence across species

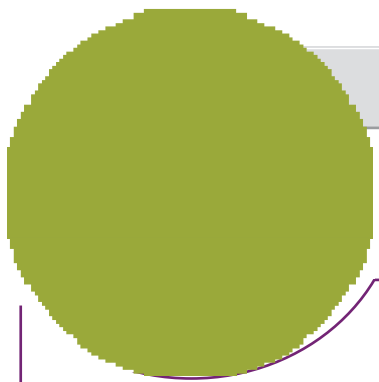

# Anoa

GenBank: **BK063916**

P29%

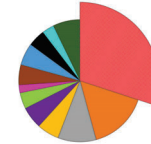

0

## *Bubalus depressicornis*

Artiodactyla 46/50  
Bovidae 26/30

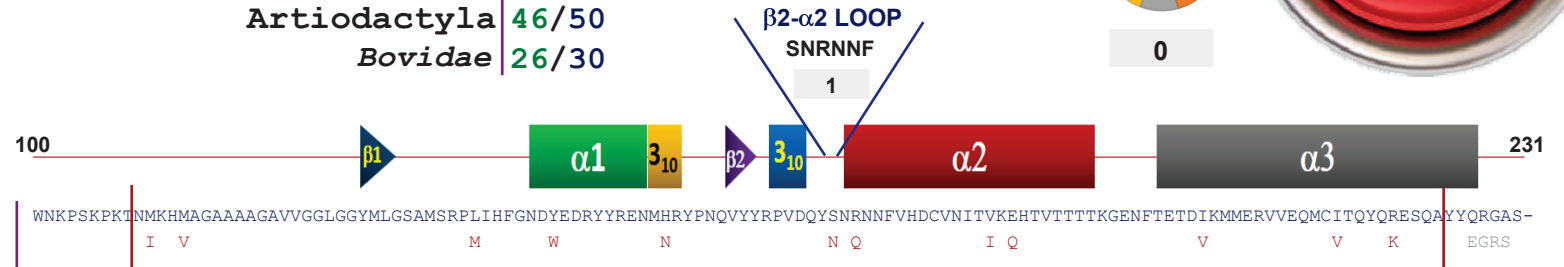

PrP sequence differs by 12 amino acids from the bank vole PrP (see in red)

- No deletions
- No insertions
- No polymorphic variants found

Tm<sup>Exp</sup>: ND

ΔΔG: **-12.62**

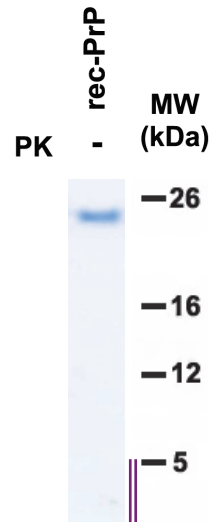

220 AA

0  
Conformers

**NO MISFOLDING**

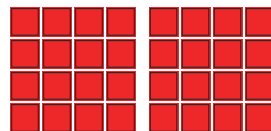

*In vitro* studies

**NOT APPLICABLE**

*In vivo* studies

**NOT APPLICABLE**

pLDDT [86.73]

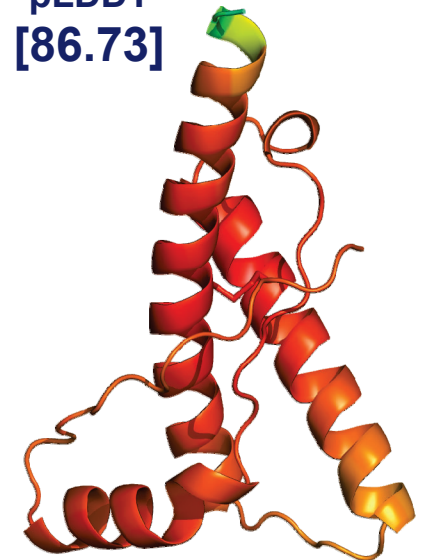

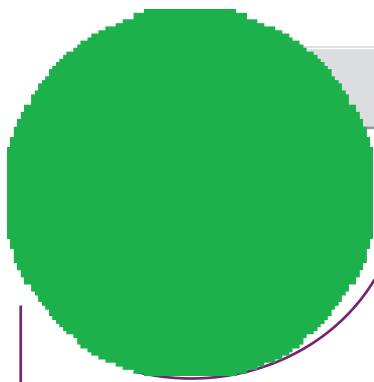

# Takin

GenBank: AB060290

P56%

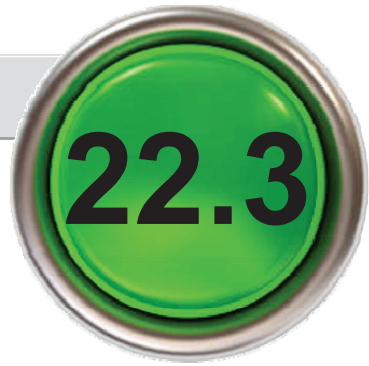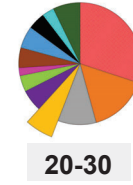

## *Budorcas taxicolor*

Artiodactyla 46/50  
Bovidae 26/30

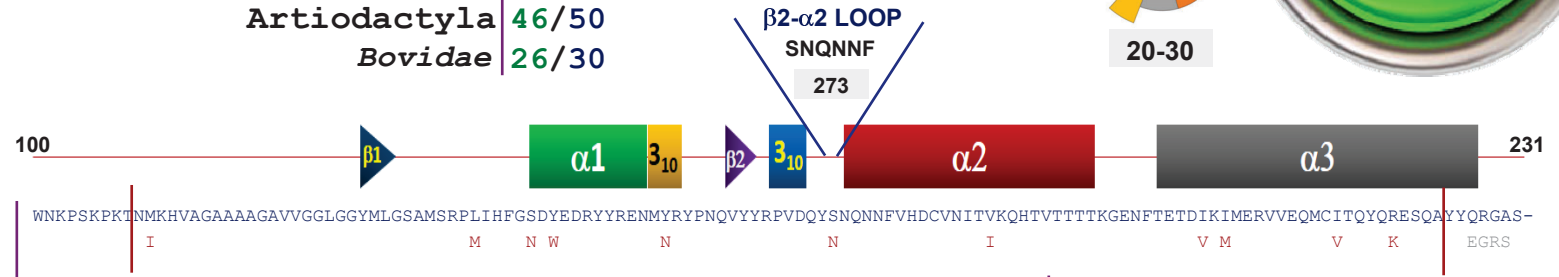

PrP sequence differs by 11 amino acids from the bank vole PrP (see in red)

- No deletions
- No insertions
- No polymorphic variants found

Distinct primary sequence across species

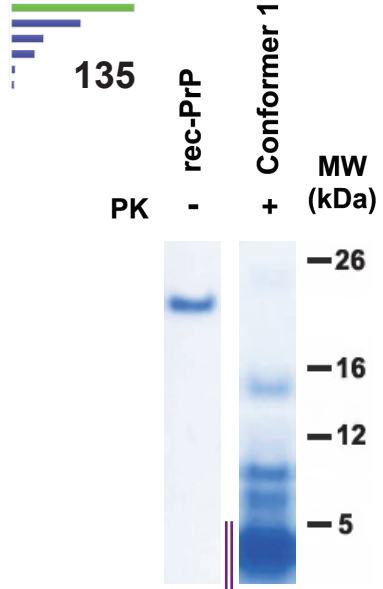

212 AA

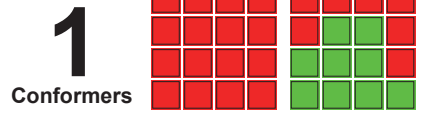

$T_m^{Exp}$ : ND  
 $\Delta\Delta G$ : -12.4

### *In vitro* studies

|             |            |
|-------------|------------|
| TgVole (1x) | Not tested |
| Takin       | Not tested |

### *In vivo* studies

|             |            |
|-------------|------------|
| TgVole (1x) | Not tested |
| Takin       | Not tested |

pLDDT [86]

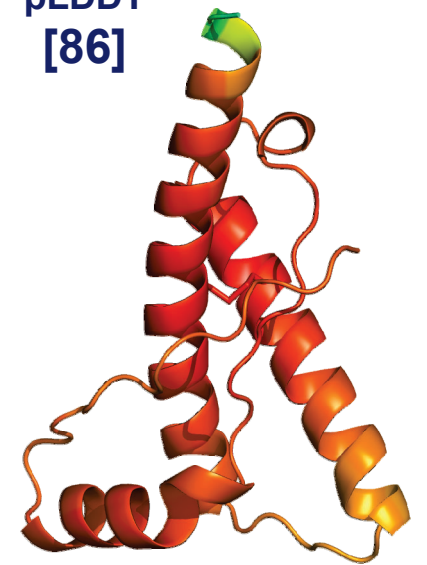

1 species sharing the same primary sequence

# Bactrian camel

GenBank: HQ204566

P45%

8.9

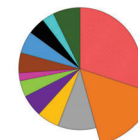

0-10

## Camelus bactrianus ferus

Artiodactyla 46/50  
Camelidae 2/2

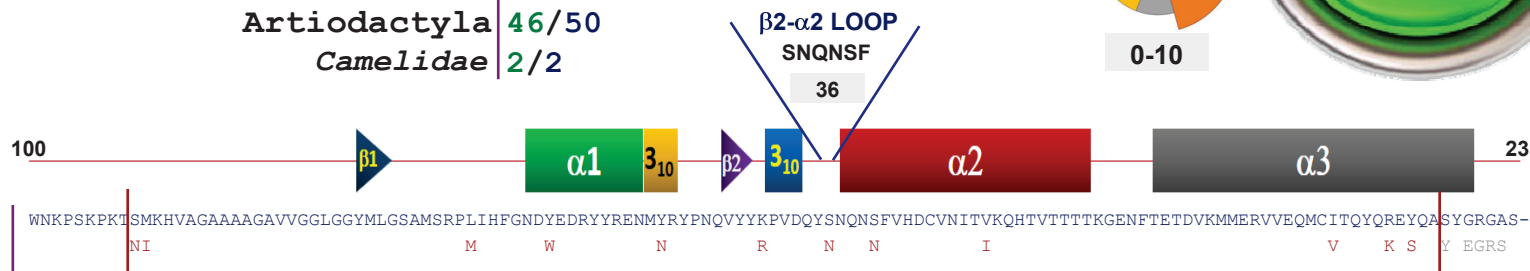

PrP sequence differs by 12 amino acids from the bank vole PrP (see in red)

- No deletions
- No insertions
- No polymorphic variants found

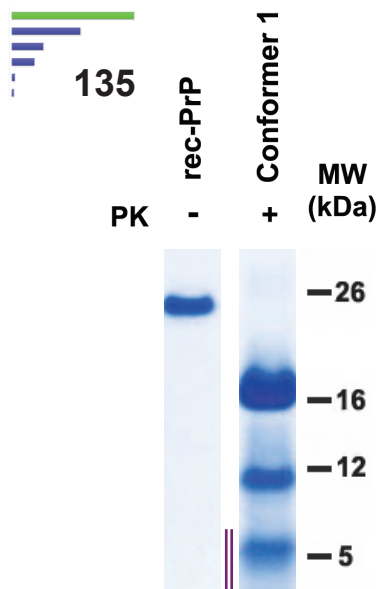

212 AA

1  
Conformers

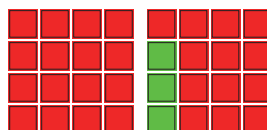

Tm<sup>Exp</sup>: ND

ΔΔG: -3.78

### In vitro studies

TgVole (1x) Not tested

Bactrian camel Not tested

### In vivo studies

TgVole (1x) Not tested

Bactrian camel Not tested

pLDDT [85.87]

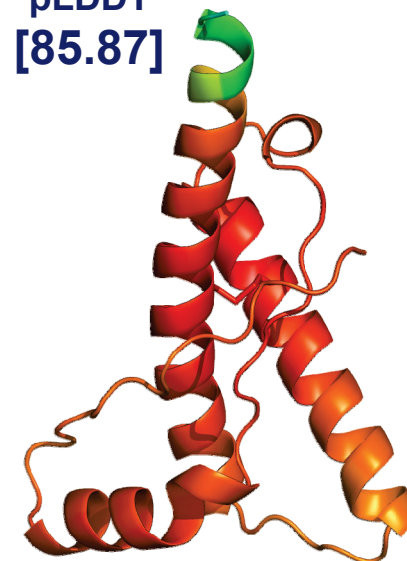



# Chacoan peccary

GenBank: **BK063918**

P67%

40

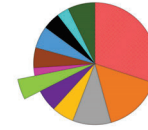

40-50

## Catagonus wagneri

Artiodactyla 46/50  
Tayassuidae 1/1

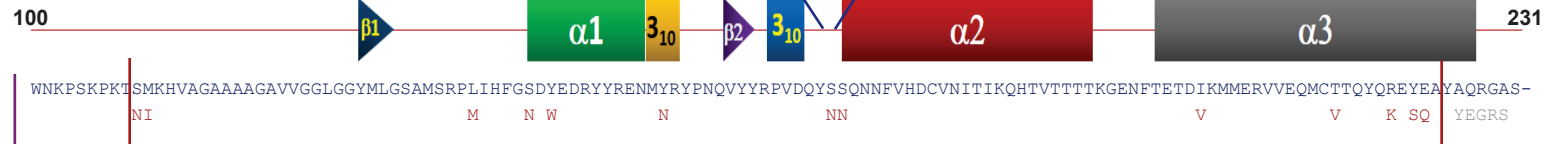

PrP sequence differs by 13 amino acids from the bank vole PrP (see in red)

- No deletions
- No insertions
- No polymorphic variants found

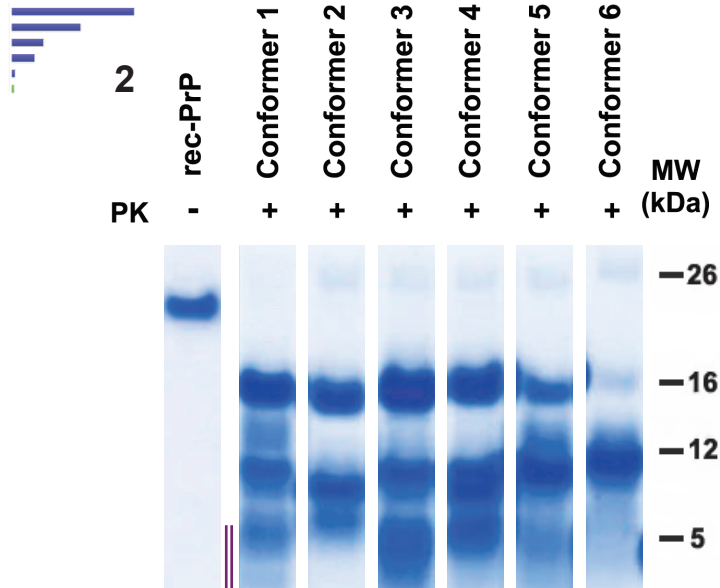

213 AA

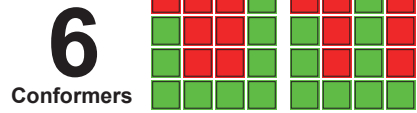

Tm<sup>Exp</sup>: ND

ΔΔG: -17.92

### In vitro studies

- TgVole (1x) Not tested
- Chacoan peccary Not tested

### In vivo studies

- TgVole (1x) Not tested
- Chacoan peccary Not tested

pLDDT [88.23]

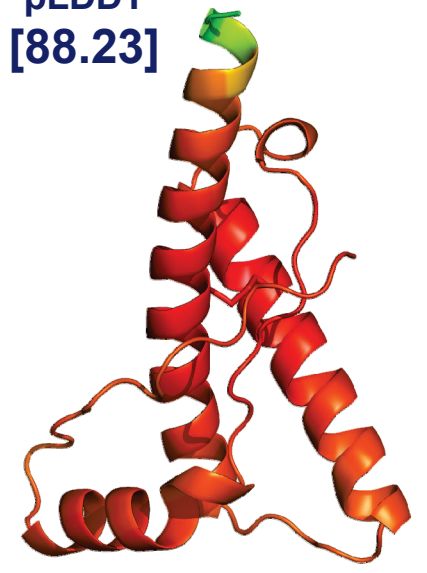

1 species sharing the same primary sequence

Collared peccary  
*Dicotyles tajacu*

3 species sharing the same primary sequence

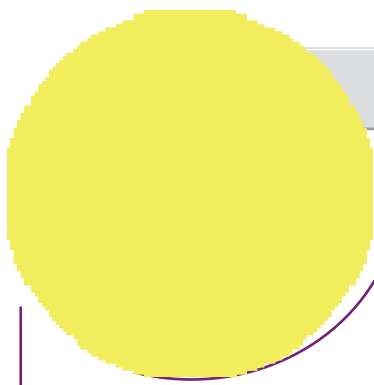

- Indian hog deer *Axis porcinus*
- Sika deer *Cervus nippon*
- Thorold's deer *Przewalskium albirostris*

**Elk**

GenBank: EU032294

P100%

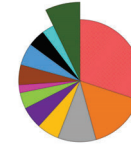

100

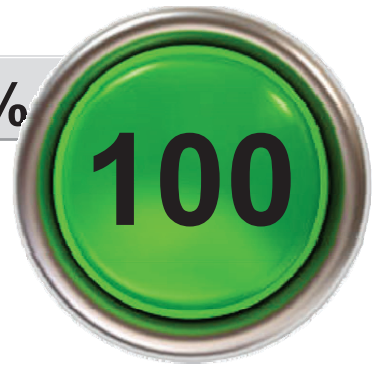

*Cervus elaphus canadensis*

Artiodactyla 46/50  
Cervidae 6/6

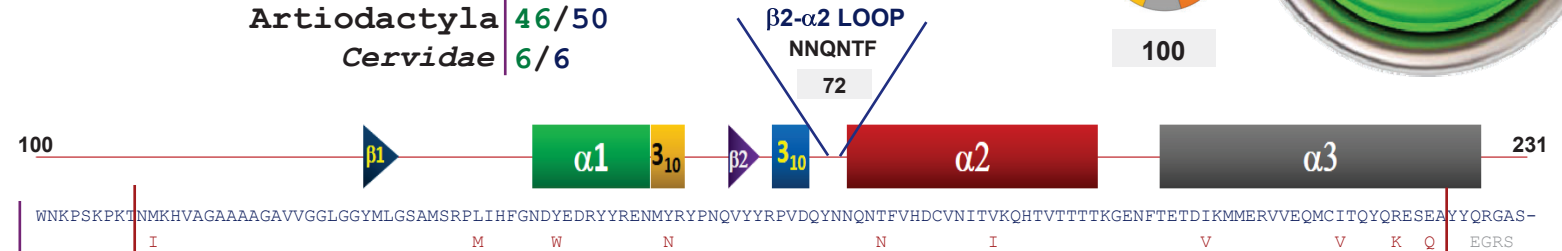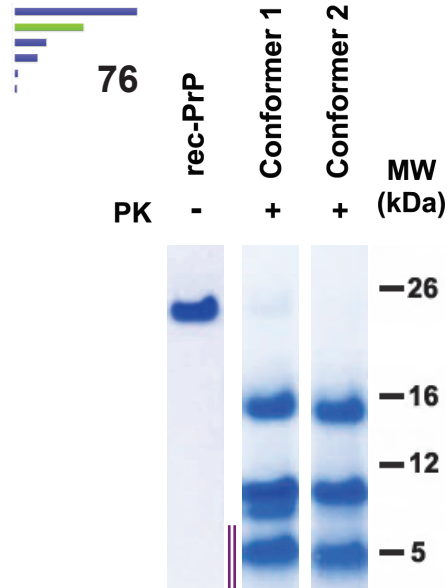

212 AA

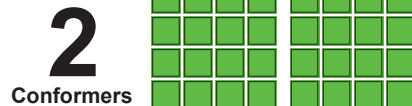

$T_m^{Exp}$ : 69 °C

$\Delta\Delta G$ : -11.73

*In vitro* studies

- TgVole (1x) Propagate
- Elk Propagate

*In vivo* studies

- TgVole (1x) Infectious
- TgElk Ongoing

pLDDT [89.43]

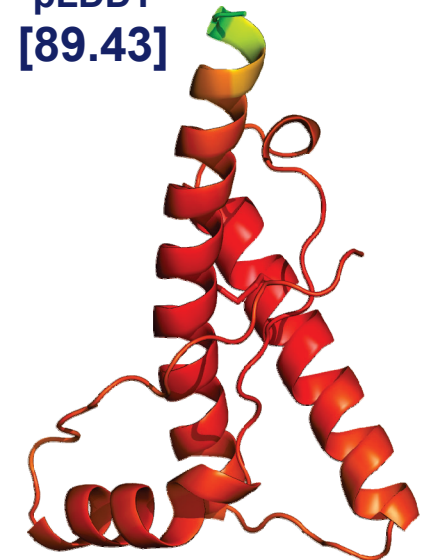

# Blue wildebeest

GenBank: EF165086

P39%

3.6

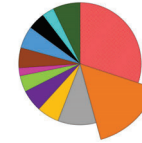

0-10

## Connochaetes taurinus

Artiodactyla 46/50  
Bovidae 26/30

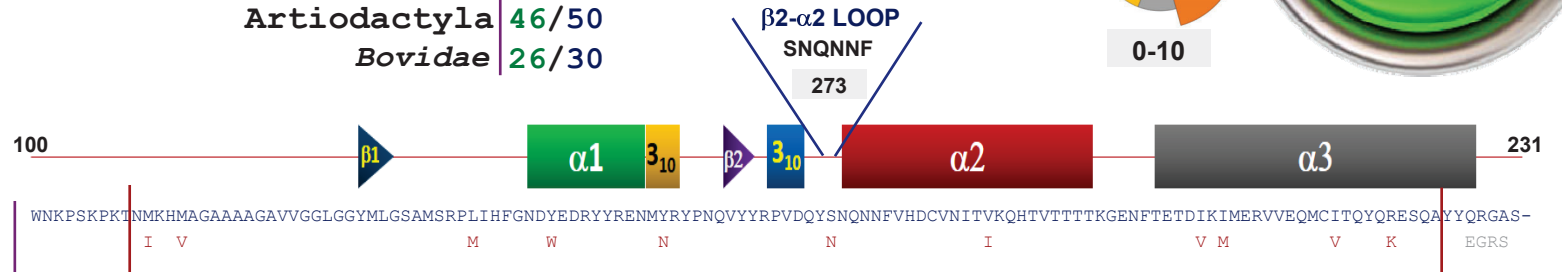

PrP sequence differs by 11 amino acids from the bank vole PrP (see in red)

- No deletions
- No insertions
- No polymorphic variants found

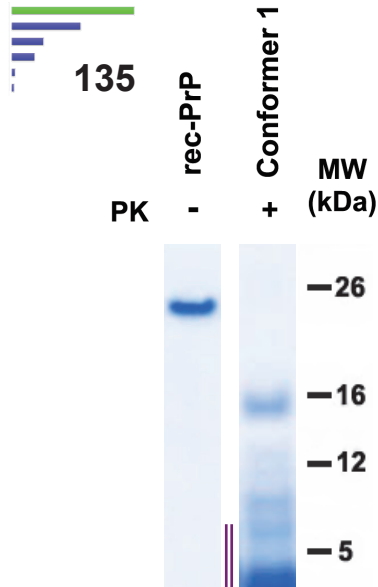

212 AA

1  
Conformers

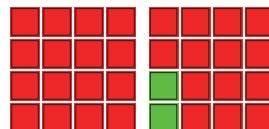

Tm<sup>Exp</sup>: ND

ΔΔG: -8.49

### In vitro studies

- TgVole (1x) Not tested
- Blue wildebeest Not tested

### In vivo studies

- TgVole (1x) Not tested
- Blue wildebeest Not tested

pLDDT [89.2]

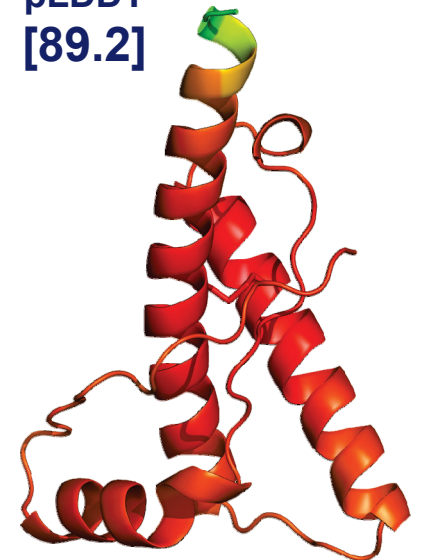

1 species sharing the same primary sequence

Black wildebeest  
*Connochaetes gnou*

# Fallow deer

GenBank: EF139175

P100%

100



100

*Dama dama*

Artiodactyla 46/50

Cervidae 6/6

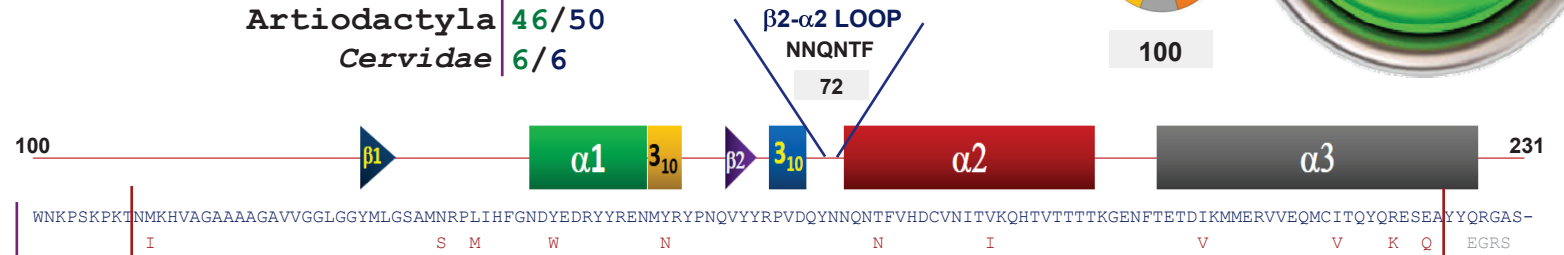

PrP sequence differs by 11 amino acids from the bank vole PrP (see in red)

- No deletions
- No insertions
- No polymorphic variants found

Distinct primary sequence across species

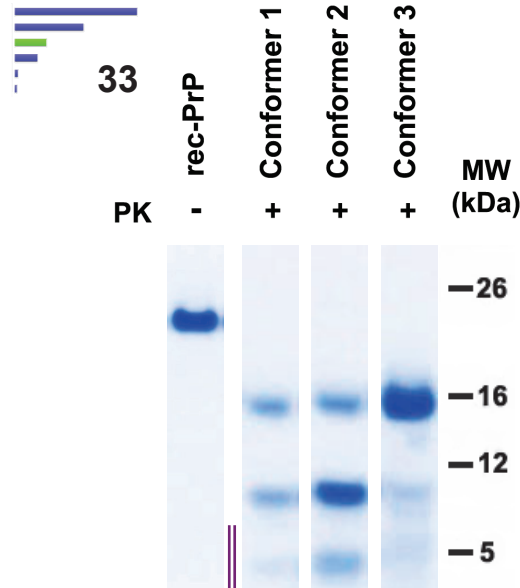

212 AA

3 Conformers

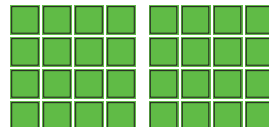

$T_m^{Exp}$ : 66.8 °C

$\Delta\Delta G$ : -10.8

*In vitro* studies

|             |            |
|-------------|------------|
| TgVole (1x) | Not tested |
| Fallow deer | Not tested |

*In vivo* studies

|             |            |
|-------------|------------|
| TgVole (1x) | Not tested |
| Fallow deer | Not tested |

pLDDT [88.45]

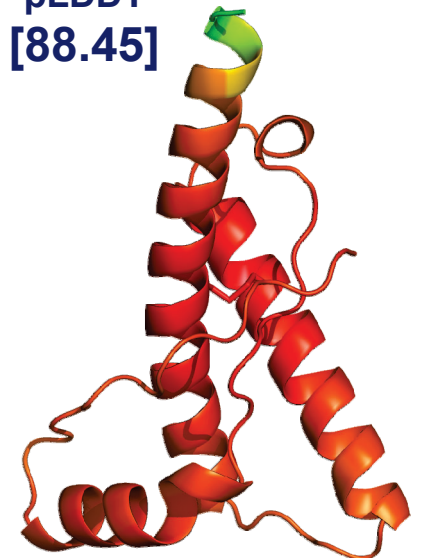

# Reticulata giraffe

GenBank: AF113942

P35%

1.6

*Giraffa camelopardalis reticulata*

Artiodactyla 46/50  
Giraffidae 2/2



0-10

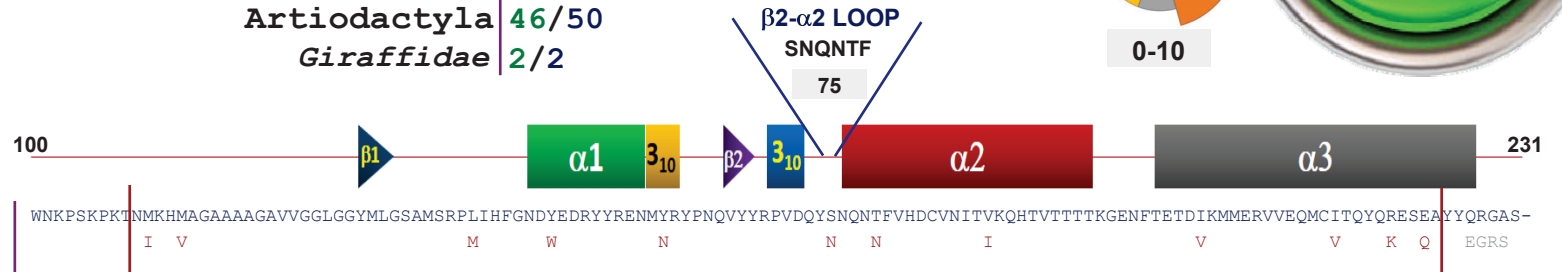

PrP sequence differs by 12 amino acids from the bank vole PrP (see in red)

No deletions  
No insertions  
No polymorphic variants found

Distinct primary sequence across species

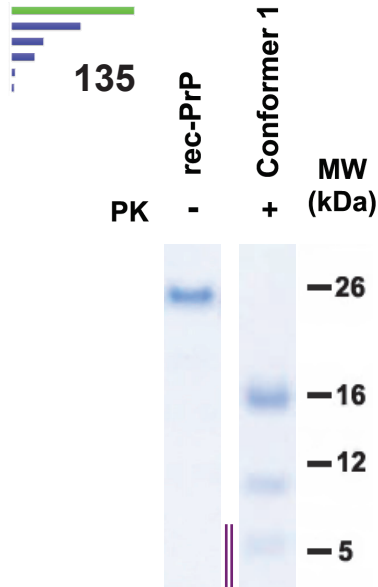

220 AA

1  
Conformers

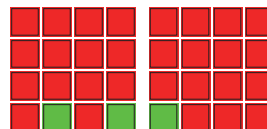

Tm<sup>Exp</sup>: ND

ΔΔG: -14.52

*In vitro* studies

TgVole (1x) Not tested

Reticulata giraffe Not tested

*In vivo* studies

TgVole (1x) Not tested

Reticulata giraffe Not tested

pLDDT [88.64]

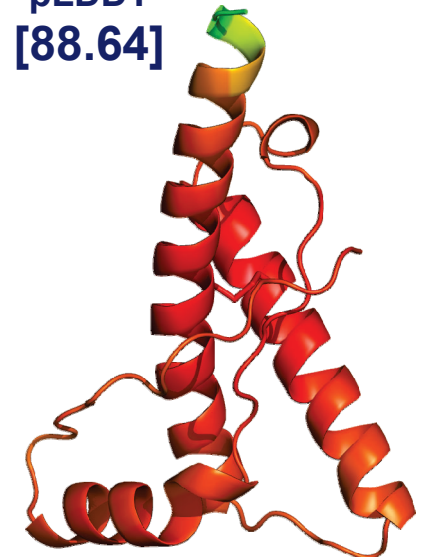

# Pygmy hippopotamus

GenBank: AB919084

P45%

8.9



0-10

## Hexaprotodon liberiensis

Artiodactyla 46/50  
Hippopotamidae 2/2

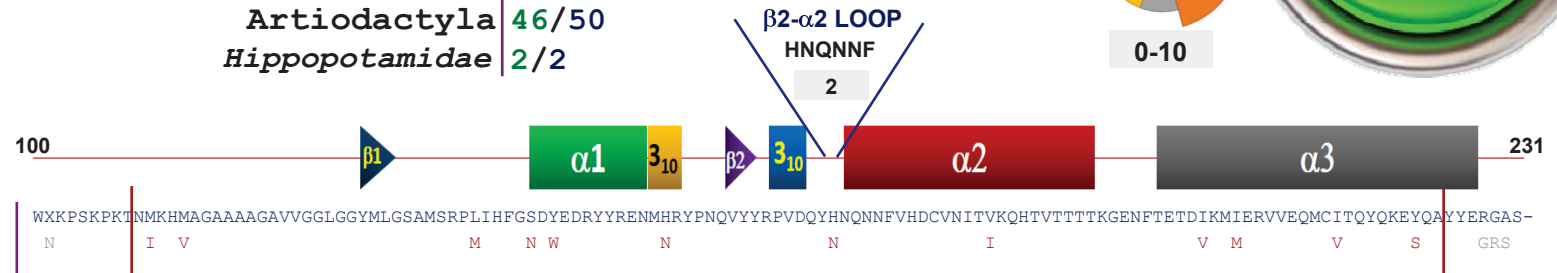

PrP sequence differs by 12 amino acids from the bank vole PrP (see in red)

- No deletions
- No insertions
- No polymorphic variants found

Distinct primary sequence across species

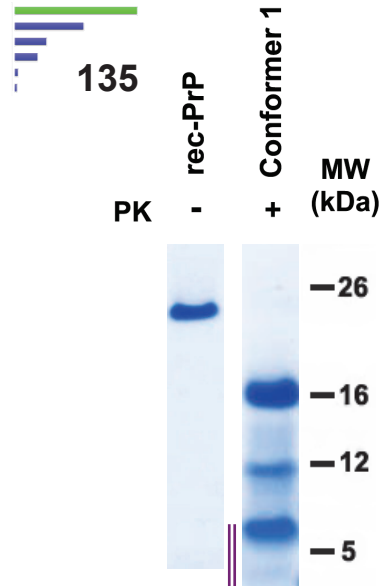

212 AA

1  
Conformers

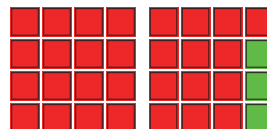

Tm<sup>Exp</sup>: ND  
ΔΔG: ND

### In vitro studies

- TgVole (1x) Not tested
- Pygmy hippopotamus Not tested

### In vivo studies

- TgVole (1x) Not tested
- Pygmy hippopotamus Not tested

pLDDT [86.66]

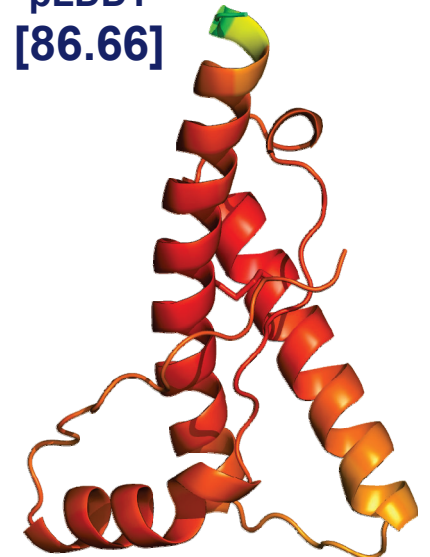

# Hippopotamus

GenBank: AB919083

P34%

0.9



0-10

## Hippopotamus amphibius

Artiodactyla 46/50  
Hippopotamidae 2/2

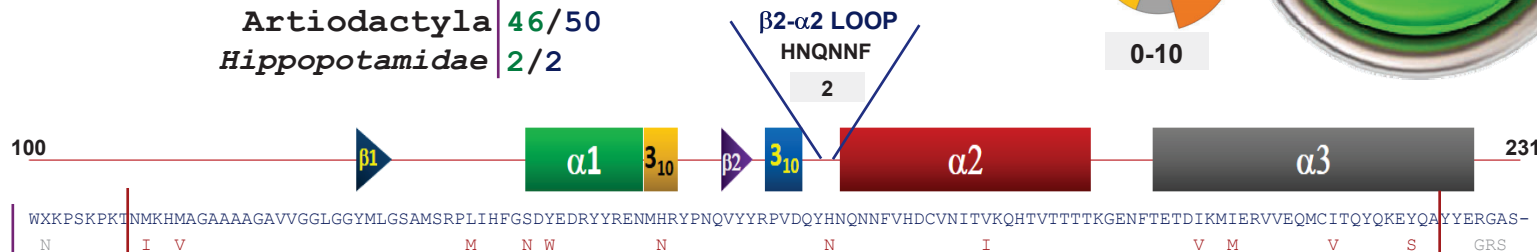

PrP sequence differs by 12 amino acids from the bank vole PrP (see in red)

- No deletions
- No insertions
- No polymorphic variants found

Distinct primary sequence across species

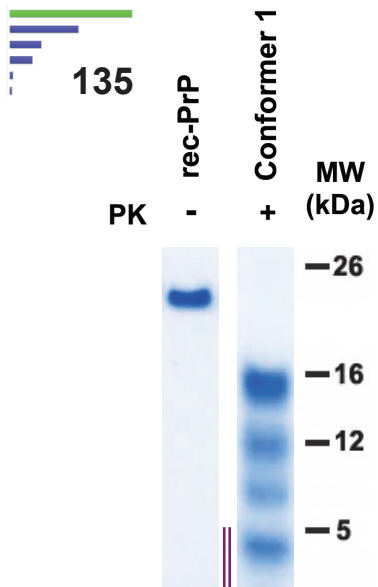

212 AA

1  
Conformers

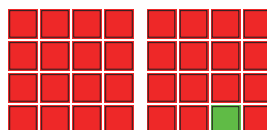

Tm<sup>Exp</sup>: ND

ΔΔG: ND

### In vitro studies

- TgVole (1x) Not tested
- Hippopotamus Not tested

### In vivo studies

- TgVole (1x) Not tested
- Hippopotamus Not tested

pLDDT [86.24]

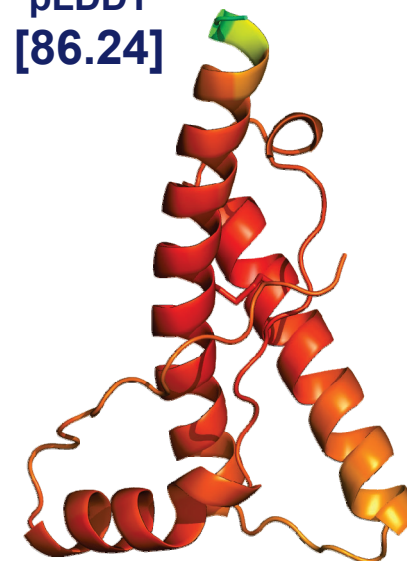

# Sable antelope

GenBank: **BK064056**

P88%

85.7

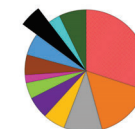

80-90

## *Hippotragus niger niger*

Artiodactyla 46/50  
Bovidae 26/30

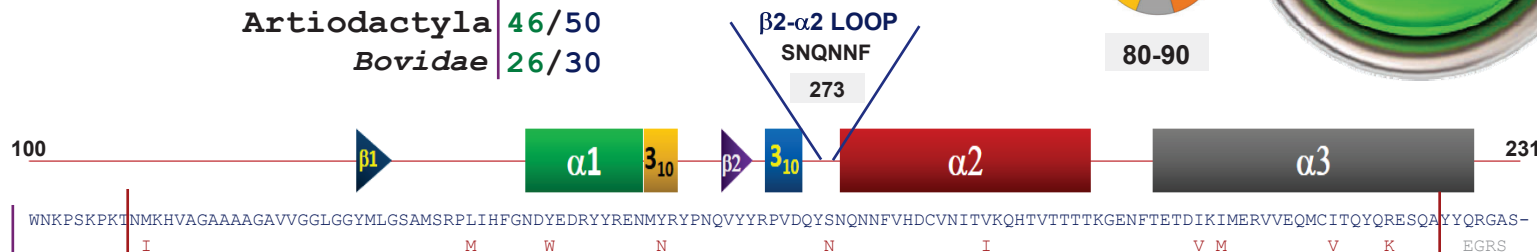

PrP sequence differs by 10 amino acids from the bank vole PrP (see in red)

No deletions  
No insertions  
It shows polymorphic variants

5 species sharing the same primary sequence

- Addax *Addax nasomaculatus*
- Hirola *Beatragus hunteri*
- Common tsessebe *Damaliscus lunatus*
- Roan antelope *Hippotragus equinus*
- Scimitar oryx *Oryx dammah*

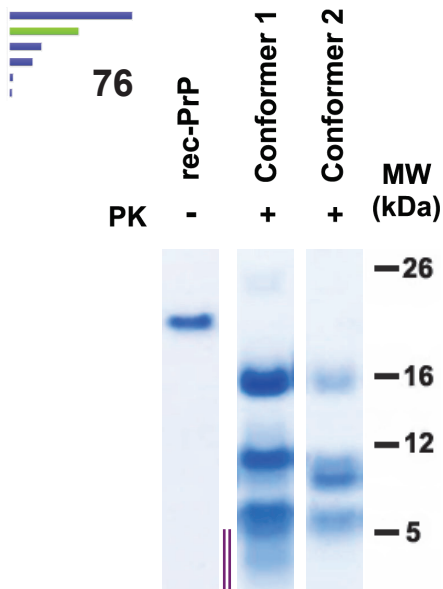

212 AA

2  
Conformers

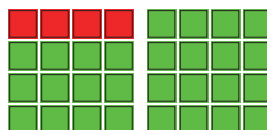

Tm<sup>Exp</sup>: ND

ΔΔG: -11.98

### *In vitro* studies

TgVole (1x) Not tested

Sable antelope Not tested

### *In vivo* studies

TgVole (1x) Not tested

Sable antelope Not tested

pLDDT [88.97]

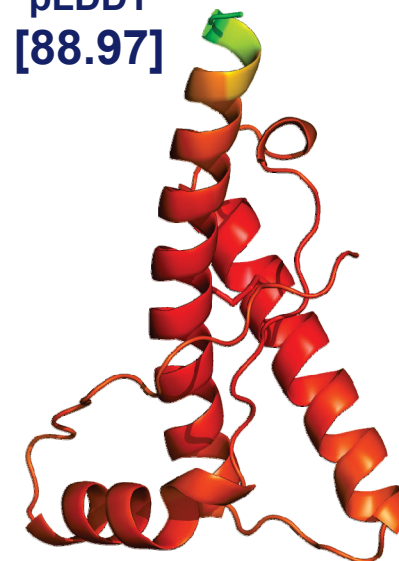



# Waterbuck

GenBank: EF165087

P69%

44.6

## *Kobus ellipsiprymnus*

Artiodactyla 46/50

Bovidae 26/30

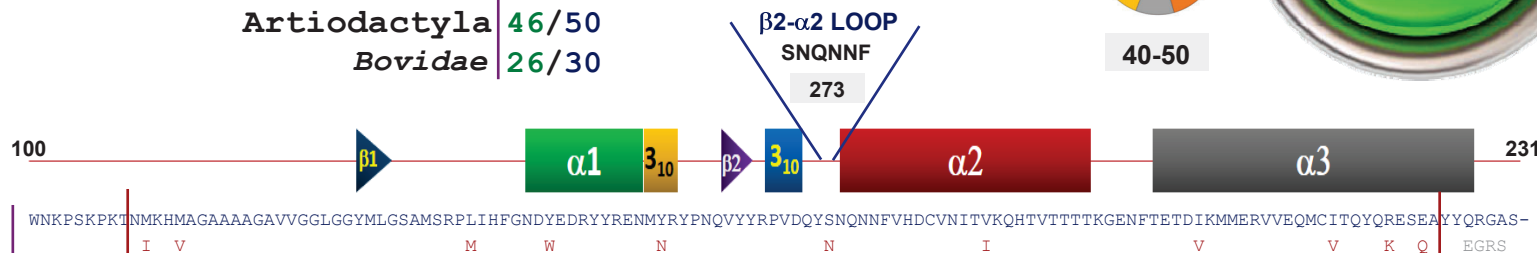

PrP sequence differs by 11 amino acids from the bank vole PrP (see in red)

No deletions  
No insertions  
No polymorphic variants found

Distinct primary sequence across species

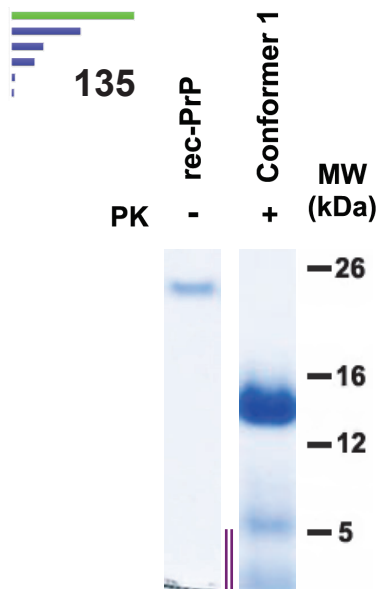

220 AA

1  
Conformers

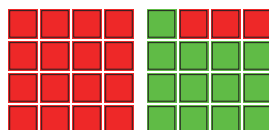

$T_m^{Exp}$ : ND

$\Delta\Delta G$ : -12.69

### *In vitro* studies

TgVole (1x) Not tested  
Waterbuck Not tested

### *In vivo* studies

TgVole (1x) Not tested  
Waterbuck Not tested

pLDDT  
[89.78]

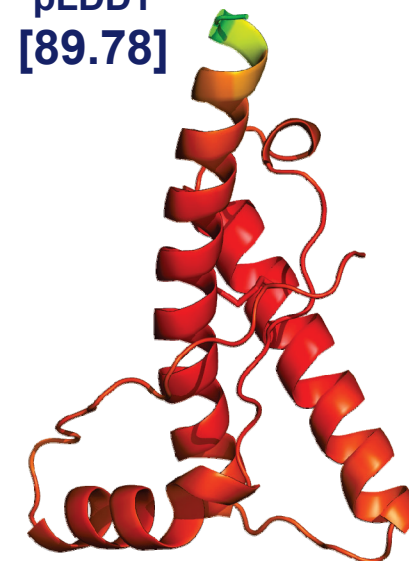

1 species sharing the same primary sequence

Lechwe  
*Kobus leche leche*

# Nile lechwe

GenBank: EF165088

P82%

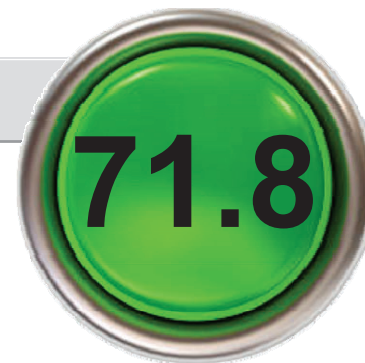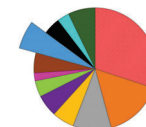

70-80

## *Kobus megaceros*

Artiodactyla 46/50  
Bovidae 26/30

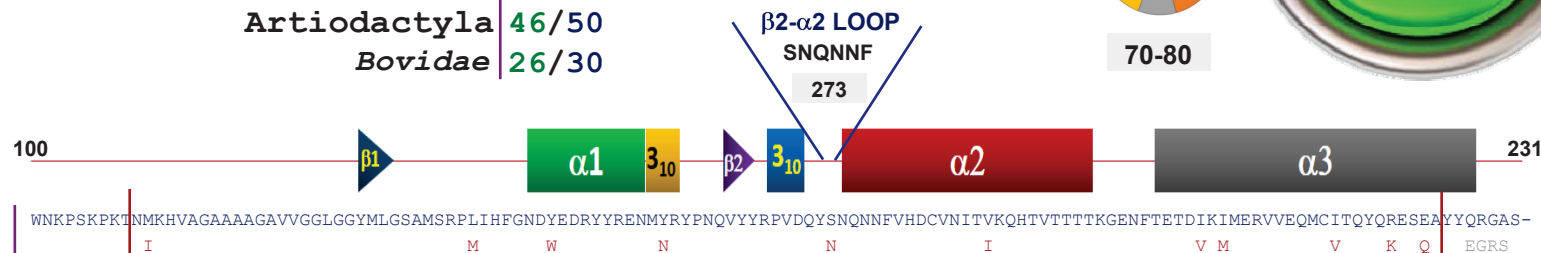

PrP sequence differs by 11 amino acids from the bank vole PrP (see in red)

No deletions  
No insertions  
No polymorphic variants found

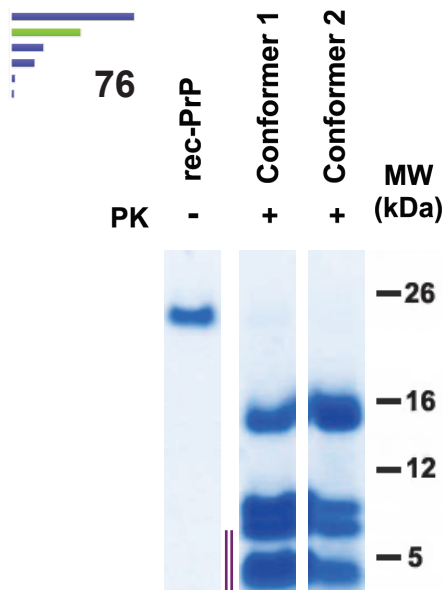

212 AA

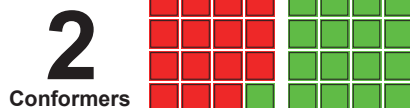

Tm<sup>Exp</sup>: 69.6 °C

ΔΔG: -13.74

### *In vitro* studies

TgVole (1x) Not tested  
Nile lechwe Not tested

### *In vivo* studies

TgVole (1x) Not tested  
Nile lechwe Not tested

pLDDT [85.79]

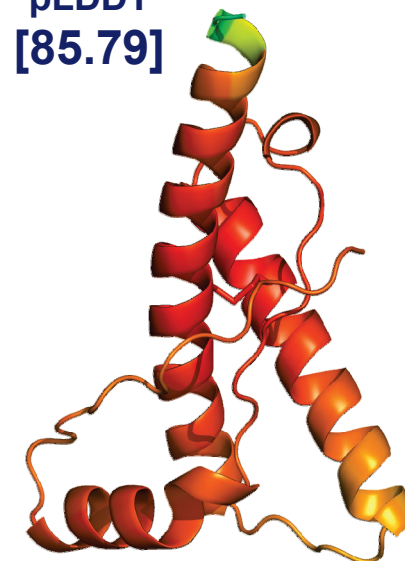

# Gerenuk

GenBank: **BK064079**

P48%

12.5

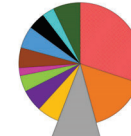

10-20

## *Litocranius walleri*

Artiodactyla 46/50  
Bovidae 26/30

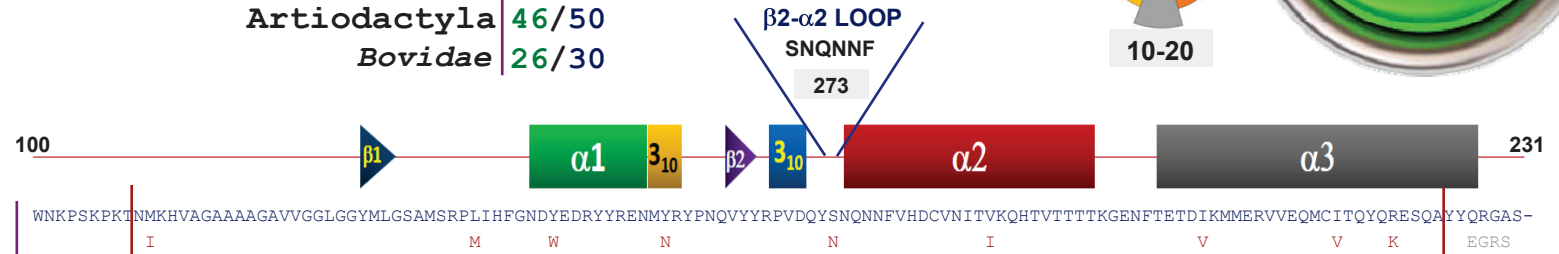

PrP sequence differs by 9 amino acids from the bank vole PrP (see in red)

No deletions  
No insertions  
No polymorphic variants found

5 species sharing the same primary sequence

- Harvey's red duiker *Cephalophus natalensis harveyi*
- Kirk's dik-dik *Madoqua kirkii*
- Suni *Neotragus moschatus*
- Klipspringer *Oreotragus oreotragus*
- Oribi *Ourebia ourebi*

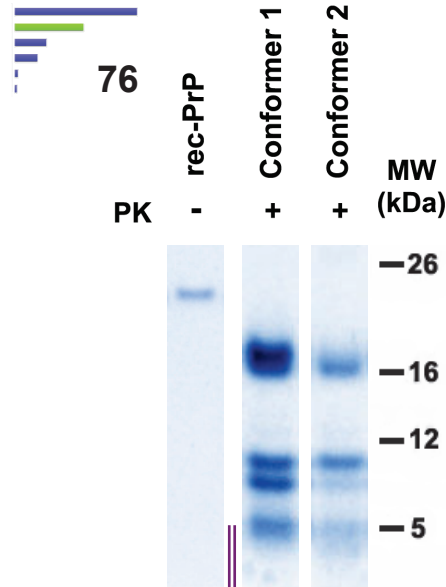

220 AA



Tm<sup>Exp</sup>: ND

ΔΔG: -13.08

### In vitro studies

TgVole (1x) Not tested

Gerenuk Not tested

### In vivo studies

TgVole (1x) Not tested

Gerenuk Not tested

pLDDT [86.3]

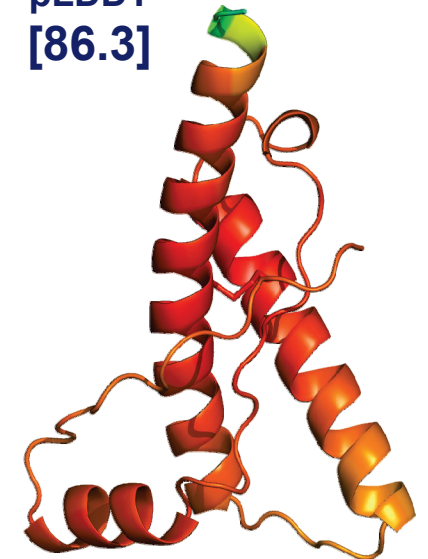

# Alpine musk deer

GenBank: AY723286

P66%

39.3

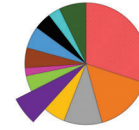

30-40

## Moschus chrysogaster

Artiodactyla 46/50  
Moschidae 2/2

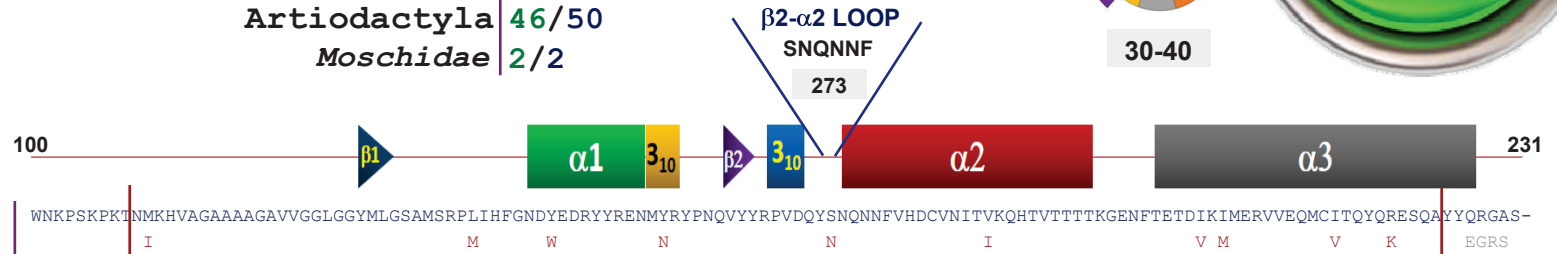

PrP sequence differs by 10 amino acids from the bank vole PrP (see in red)

- No deletions
- No insertions
- No polymorphic variants found

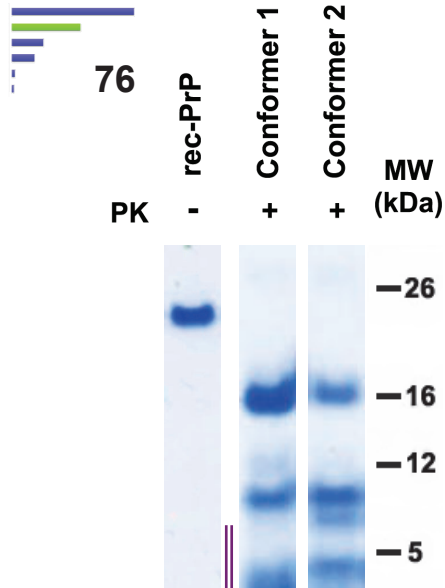

212 AA

2 Conformers

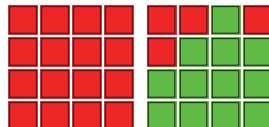

Tm<sup>Exp</sup>: ND

ΔΔG: -12.34

### In vitro studies

- TgVole (1x) Not tested
- Alpine musk deer Not tested

### In vivo studies

- TgVole (1x) Not tested
- Alpine musk deer Not tested

pLDDT [85.61]

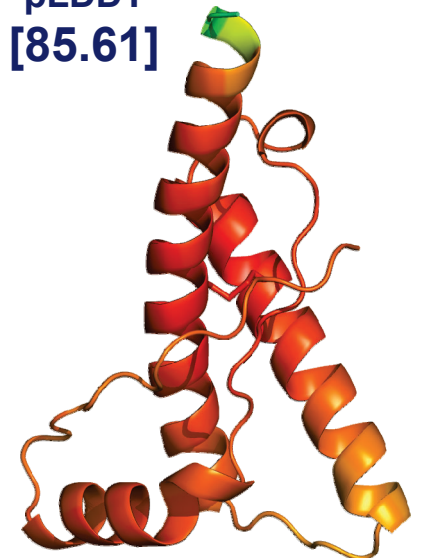

2 species sharing the same primary sequence

Dwarf musk deer  
*Moschus berezovskii*

Saiga antelope  
*Saiga tatarica*

# Siberian musk deer

GenBank: **BK063923**

**P76%**

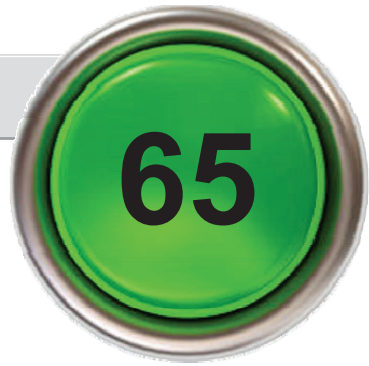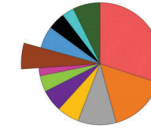

60-70

## *Moschus moschiferus*

Artiodactyla **46/50**  
 Moschidae **2/2**

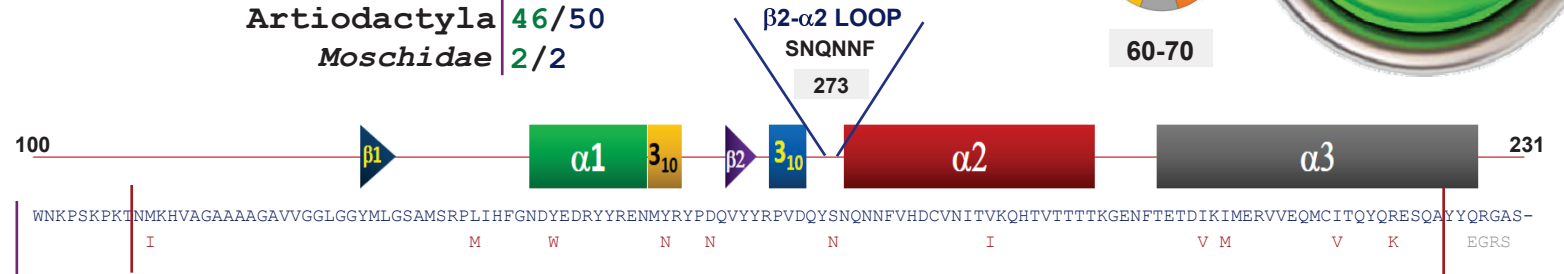

PrP sequence differs by 11 amino acids from the bank vole PrP (see in red)

- No deletions
- No insertions
- No polymorphic variants found

Distinct primary sequence across species

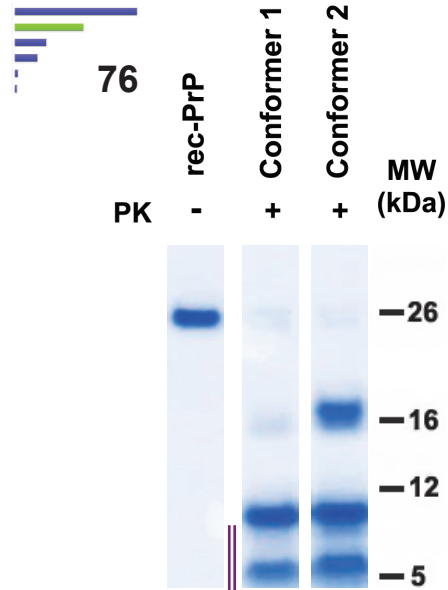

212 AA

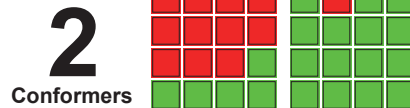

$T_m^{Exp}$ : ND

$\Delta\Delta G$ : **-11.59**

### *In vitro* studies

TgVole (1x) Not tested

Siberian musk deer Not tested

### *In vivo* studies

TgVole (1x) Not tested

Siberian musk deer Not tested

pLDDT [86.15]

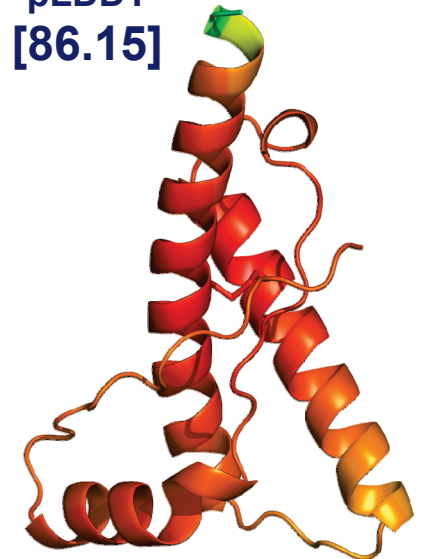

# Indian muntjac

GenBank: **BK064098**

P82%

71.8

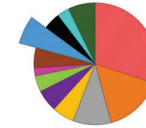

70-80

## Muntiacus muntjak

Artiodactyla 46/50  
Cervidae 6/6

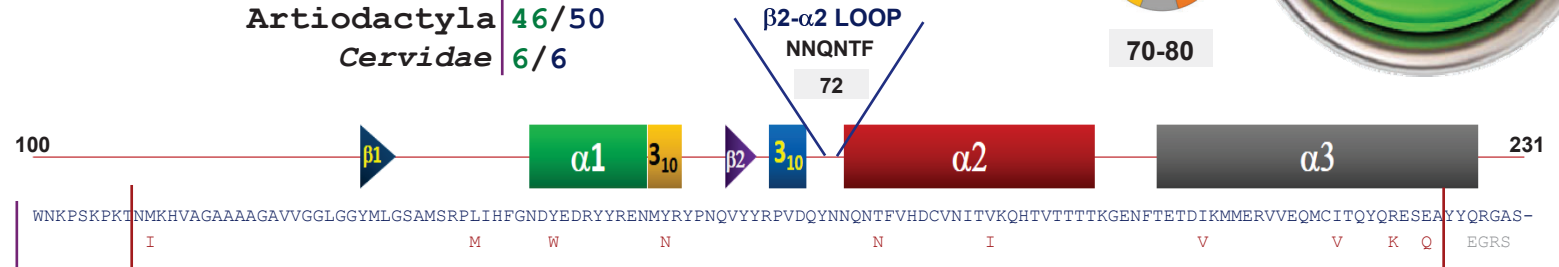

PrP sequence differs by 10 amino acids from the bank vole PrP (see in red)

- No deletions
- No insertions
- No polymorphic variants found

Distinct primary sequence across species

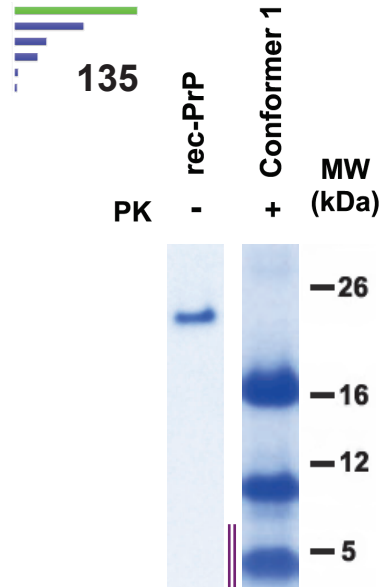

212 AA

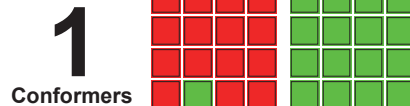

Tm<sup>Exp</sup>: ND

ΔΔG: -14.89

### In vitro studies

- TgVole (1x) Not tested
- Indian muntjac Not tested

### In vivo studies

- TgVole (1x) Not tested
- Indian muntjac Not tested

pLDDT [89.05]

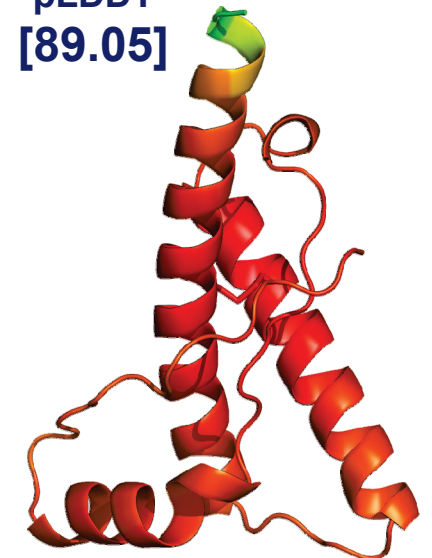

# Reeves's muntjac

GenBank: KC788406

P92%

96.4

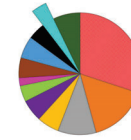

90-100

## *Muntiacus reevesi*

Artiodactyla 46/50  
Cervidae 6/6

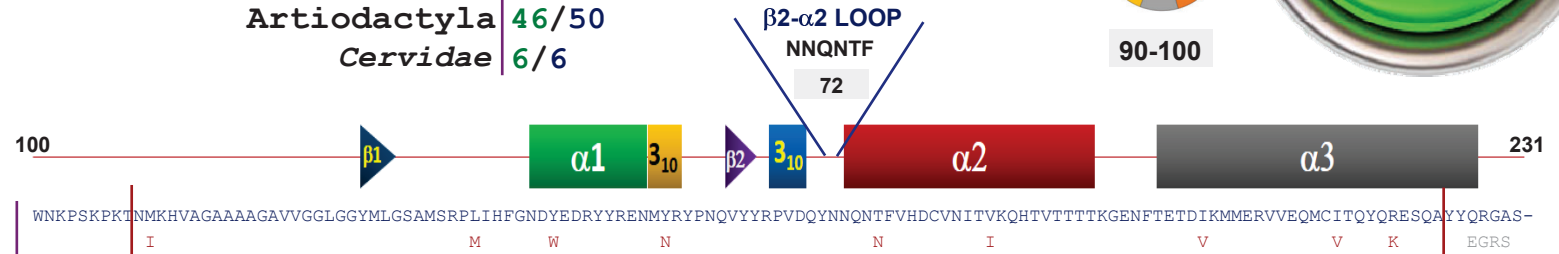

PrP sequence differs by 9 amino acids from the bank vole PrP (see in red)

No deletions  
No insertions  
No polymorphic variants found

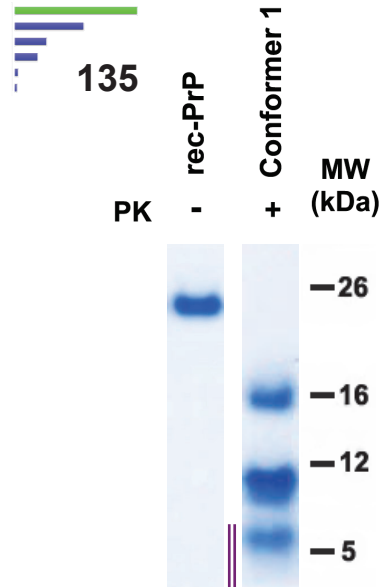

212 AA

1  
Conformers

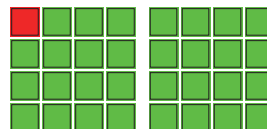

T<sub>m</sub><sup>Exp</sup>: 68.1 °C

ΔΔG: -13.83

### *In vitro* studies

TgVole (1x) Not tested

Reeves's muntjac Not tested

### *In vivo* studies

TgVole (1x) Not tested

Reeves's muntjac Not tested

pLDDT  
[86.43]

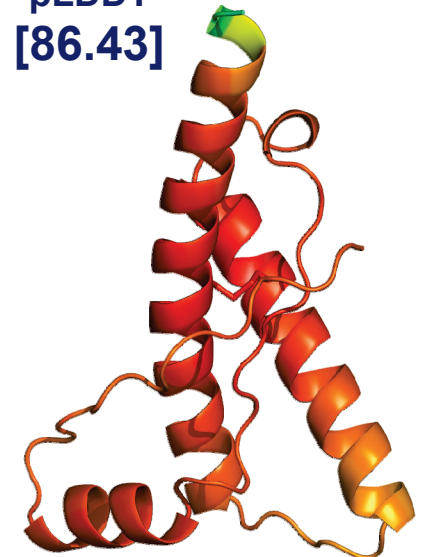

2 species sharing the same primary sequence

Hairy-fronted muntjac  
*Muntiacus crinifrons*

Gongshan muntjac  
*Muntiacus gongshanensis*

Distinct primary sequence across species

# Royal antelope

GenBank: **BK064112**

## Neotragus pygmaeus

Artiodactyla **46/50**  
Bovidae **26/30**

P100%

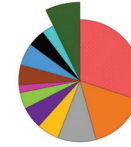

100

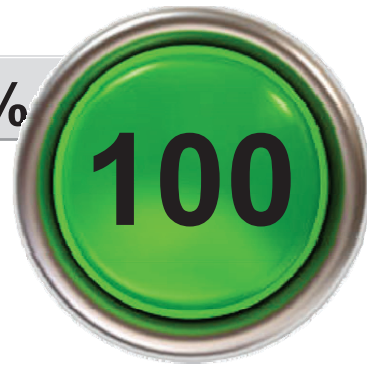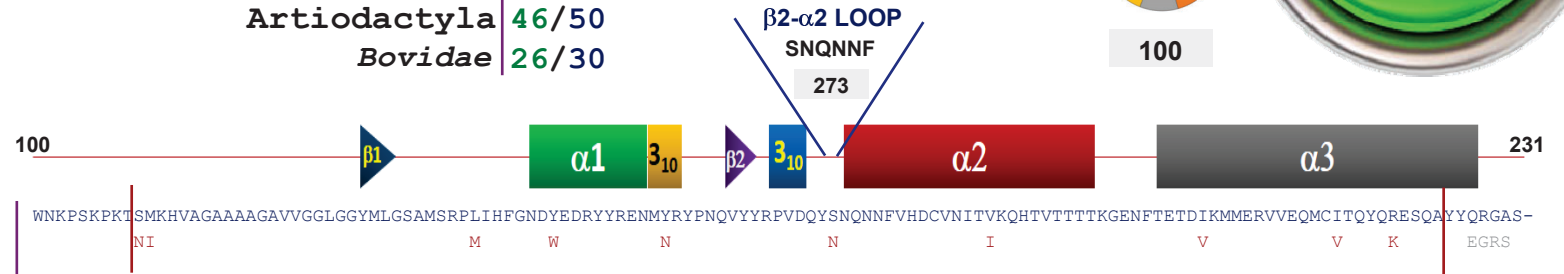

PrP sequence differs by 10 amino acids from the bank vole PrP (see in red)

- No deletions
- No insertions
- No polymorphic variants found

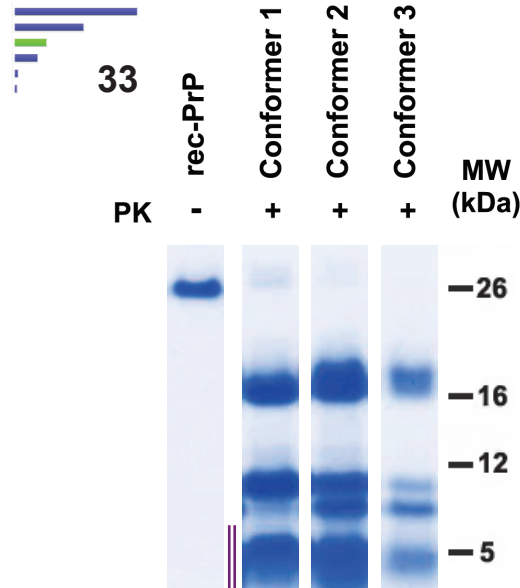

212 AA

**3**  
Conformers



Tm<sup>Exp</sup>: ND

ΔΔG: **-11.29**

### *In vitro* studies

TgVole (1x) Not tested

Royal antelope Not tested

### *In vivo* studies

TgVole (1x) Not tested

Royal antelope Not tested

pLDDT  
[89.4]

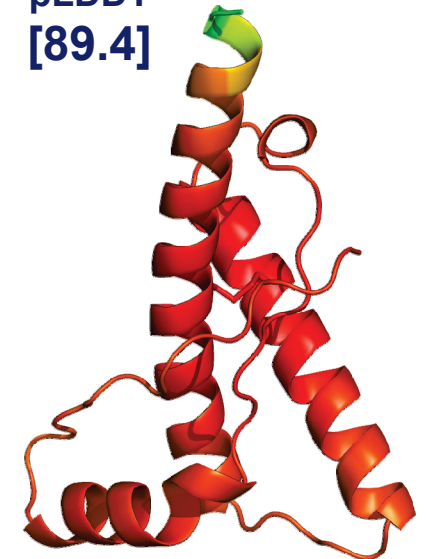



# Mule deer

GenBank: MT709729

*Odocoileus hemionus*

Artiodactyla 46/50  
Cervidae 6/6

P100%

100



100

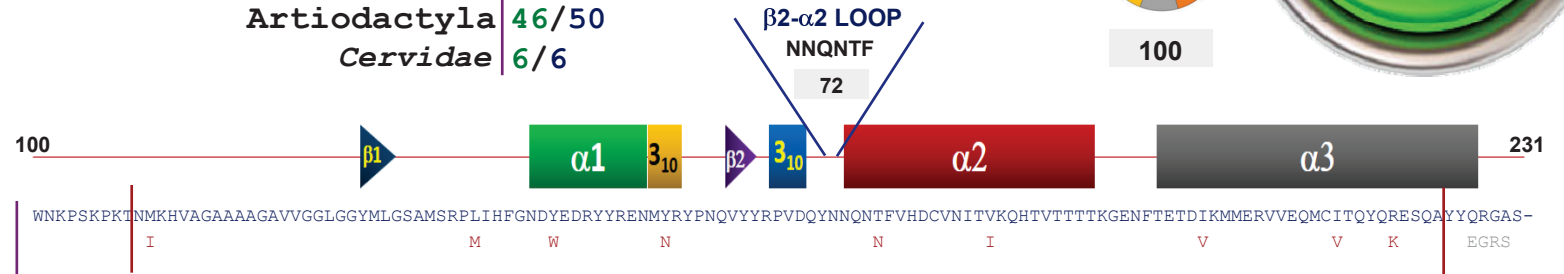

PrP sequence differs by 9 amino acids from the bank vole PrP (see in red)

No deletions  
No insertions  
It shows polymorphic variants

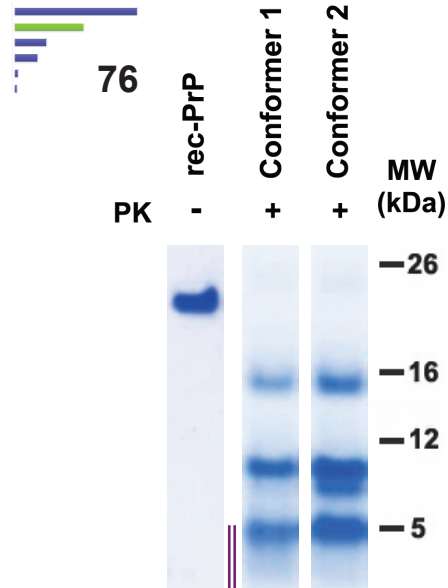

212 AA

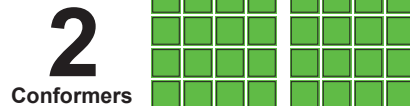

Tm<sup>Exp</sup>: 67.7 °C

ΔΔG: -21.62

## In vitro studies

TgVole (1x) Propagate  
Mule deer Propagate

## In vivo studies

TgVole (1x) Infectious  
TgMule deer Ongoing

pLDDT [87.1]

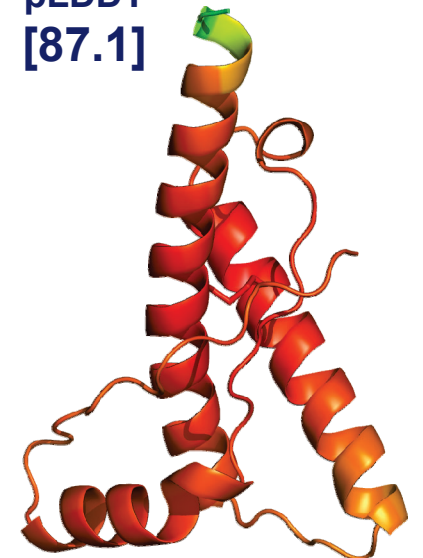

7 species sharing the same primary sequence

- Moose *Alces alces*
- Roe deer *Capreolus capreolus*
- Siberian roe deer *Capreolus pygargus*
- Water deer *Hydropotes inermis*
- White-tailed deer *Odocoileus virginianus*
- Reindeer *Rangifer tarandus*
- Eld's deer *Rucervus eldii thamin*

Distinct primary sequence across species

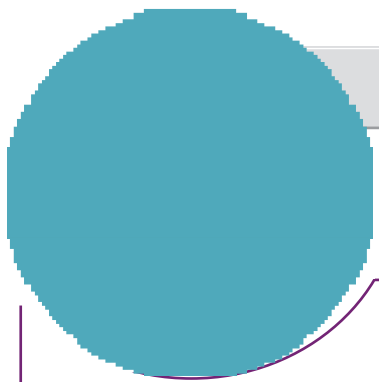

# Okapi

GenBank: **BK064032**

P88%

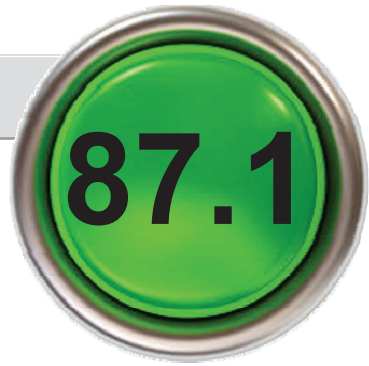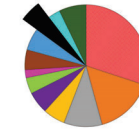

80-90

## *Okapia johnstoni*

Artiodactyla 46/50  
Giraffidae 2/2

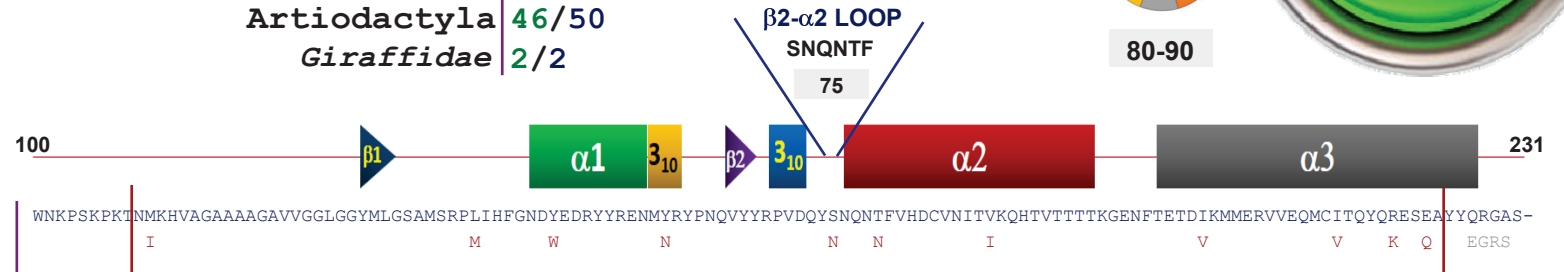

PrP sequence differs by 11 amino acids from the bank vole PrP (see in red)

- No deletions
- No insertions
- No polymorphic variants found

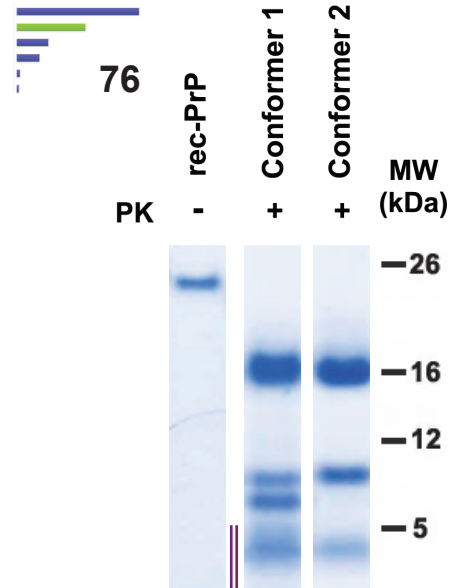

220 AA

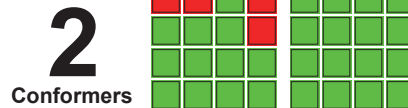

Tm<sup>Exp</sup>: ND

ΔΔG: **-12.63**

### *In vitro* studies

|             |            |
|-------------|------------|
| TgVole (1x) | Not tested |
| Okapi       | Not tested |

### *In vivo* studies

|             |            |
|-------------|------------|
| TgVole (1x) | Not tested |
| Okapi       | Not tested |

pLDDT [86.56]

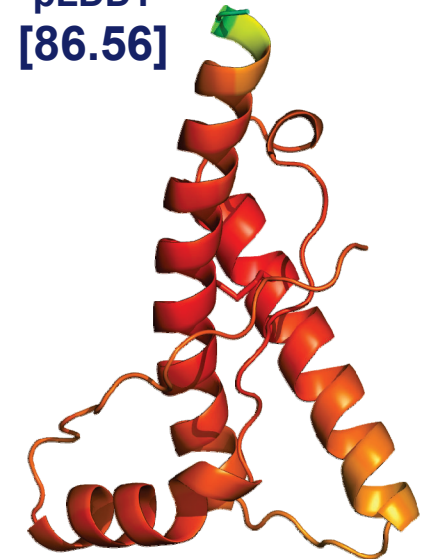

Distinct primary sequence across species

# Gemsbok

GenBank: **BK064117**

**P83%**

**76.1**

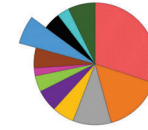

70-80

## Oryx gazella

Artiodactyla **46/50**  
Bovidae **26/30**

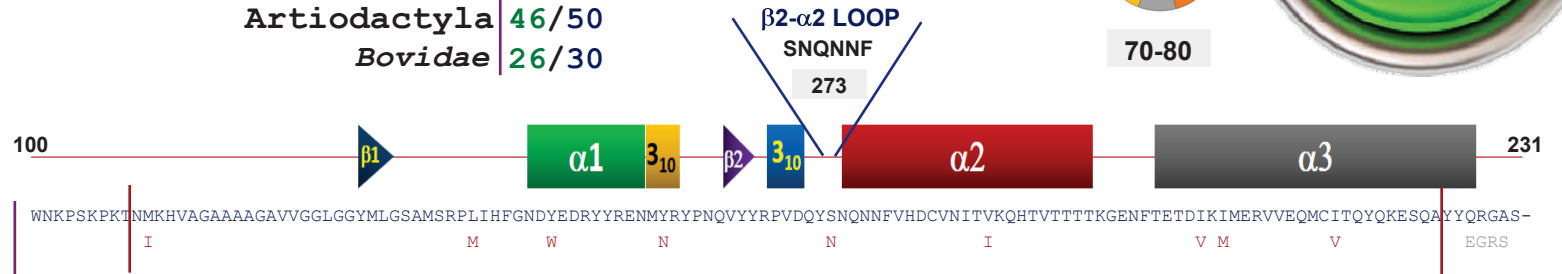

PrP sequence differs by 9 amino acids from the bank vole PrP (see in red)

No deletions  
No insertions  
No polymorphic variants found

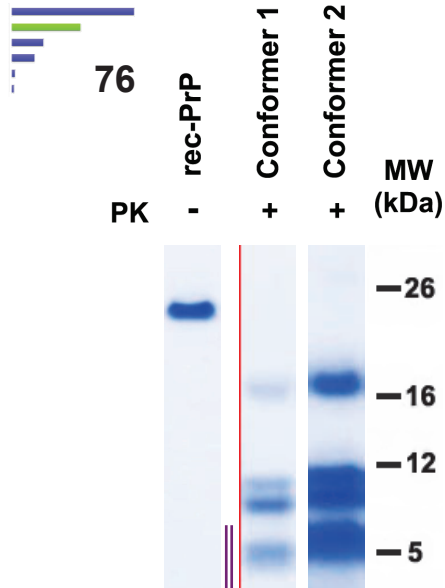

212 AA

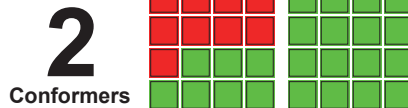

$T_m^{Exp}$ : ND

$\Delta\Delta G$ : **-11.01**

### *In vitro* studies

|             |            |
|-------------|------------|
| TgVole (1x) | Not tested |
| Gemsbok     | Not tested |

### *In vivo* studies

|             |            |
|-------------|------------|
| TgVole (1x) | Not tested |
| Gemsbok     | Not tested |

**pLDDT [85.73]**

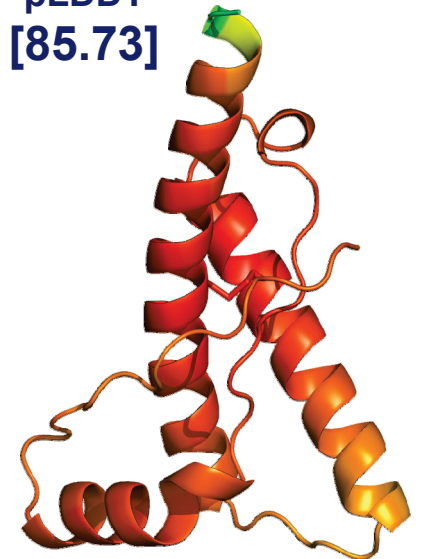

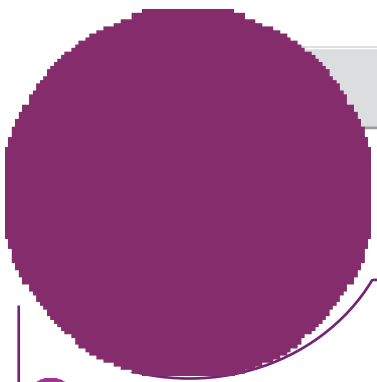

# Sheep

GenBank: NM\_001009481

P73%

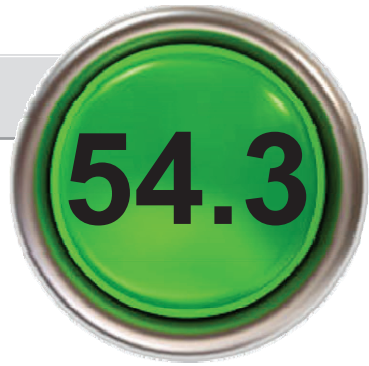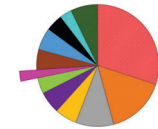

50-60

## Ovis aries

Artiodactyla 46/50  
Bovidae 26/30

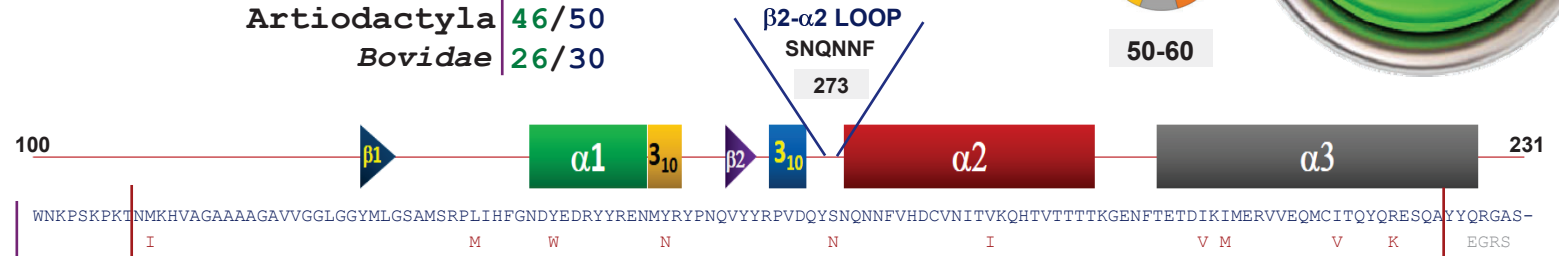

PrP sequence differs by 10 amino acids from the bank vole PrP (see in red)

No deletions  
No insertions  
It shows polymorphic variants

18 species sharing the same primary sequence

- Goat *Capra hircus*
- Dall sheep *Ovis dalli*
- Muskox *Ovibos moschatus*
- Alpine ibex *Capra ibex*
- Markhor *Capra falconeri*
- Iberian ibex *Capra pyrenaica*
- Barbary sheep *Ammotragus lervia*
- Pyrenean chamois *Rupicapra pyrenaica*
- Arabian tahr *Hemitragus jayakari*
- Japanese serow *Capricornis crispus*
- Mountain goat *Oreamnos americanus*
- Chinese goral *Naemorhedus griseus*
- Siberian ibex *Capra sibirica*
- Tibetan antelope *Pantholops hodgsonii*
- Nilgiri tahr *Hemitragus hylocrius*
- Argali *Ovis ammon*
- Snow sheep *Ovis nivicola lydekkeri*
- Bharal *Pseudois nayaur*

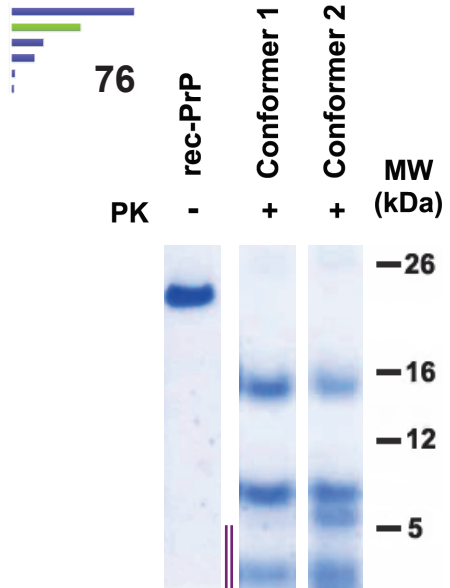

212 AA

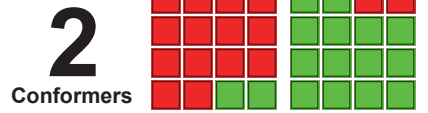

Tm<sup>Exp</sup>: 71.7 °C  
ΔΔG: -11.89

### In vitro studies

TgVole (1x) Propagate  
TgSheep Propagate

### In vivo studies

TgVole (1x) Infectious  
TgSheep Infectious

pLDDT [87.26]

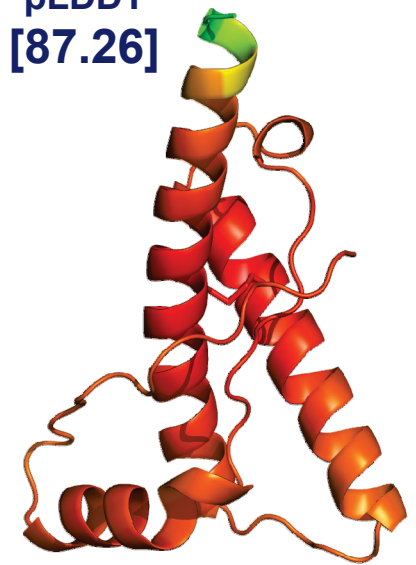

# Bighorn sheep

GenBank: DQ648476

P75%

62.5

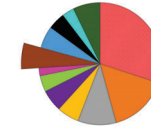

60-70

## Ovis canadensis

Artiodactyla 46/50

Bovidae 26/30

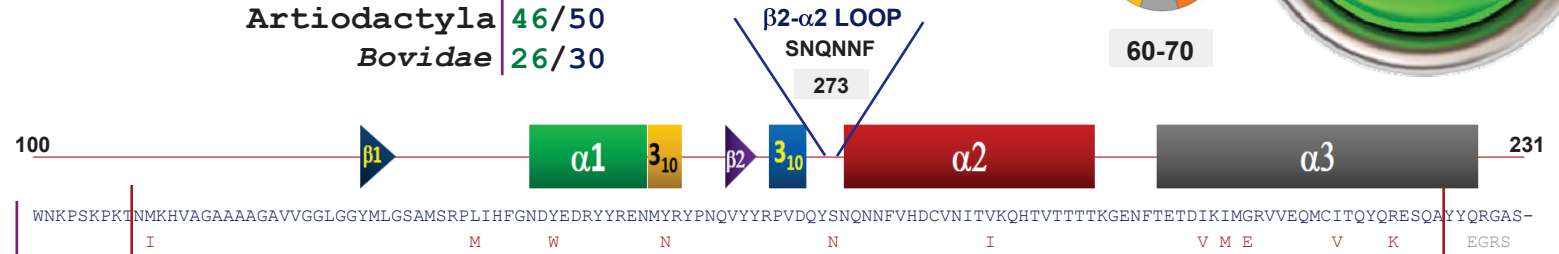

PrP sequence differs by 11 amino acids from the bank vole PrP (see in red)

No deletions  
No insertions  
It shows polymorphic variants

Distinct primary sequence across species

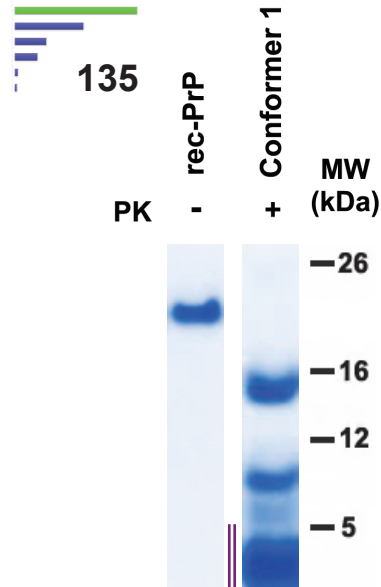

212 AA

1  
Conformers

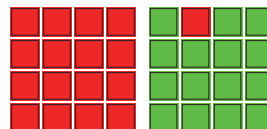

Tm<sup>Exp</sup>: ND

ΔΔG: -9.13

### In vitro studies

TgVole (1x) Not tested

Bighorn sheep Not tested

### In vivo studies

TgVole (1x) Not tested

Bighorn sheep Not tested

pLDDT  
[89.23]

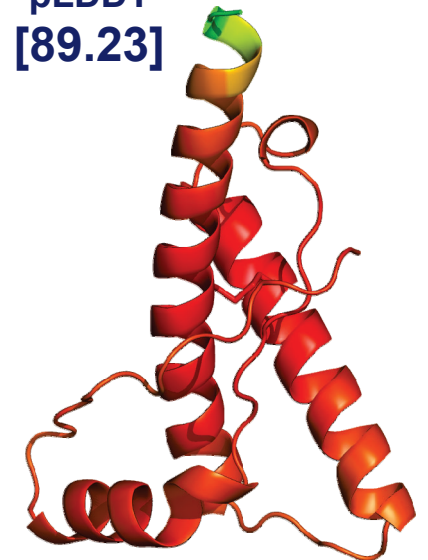

# Common warthog

GenBank: **BK063968**

P71%

48.6

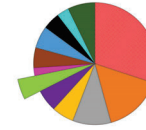

40-50

## *Phacochoerus africanus*

Artiodactyla 46/50  
Suidae 3/3

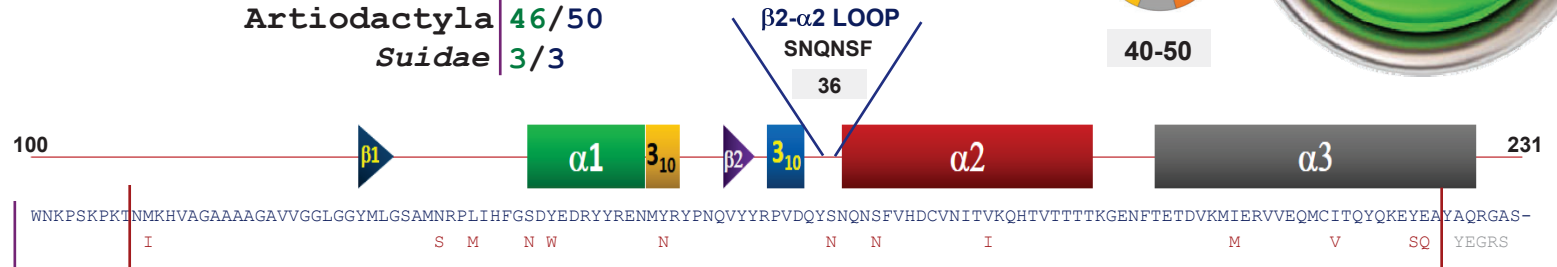

PrP sequence differs by 13 amino acids from the bank vole PrP (see in red)

- No deletions
- No insertions
- No polymorphic variants found

1 species sharing the same primary sequence

Red river hog  
*Potamochoerus porcus*

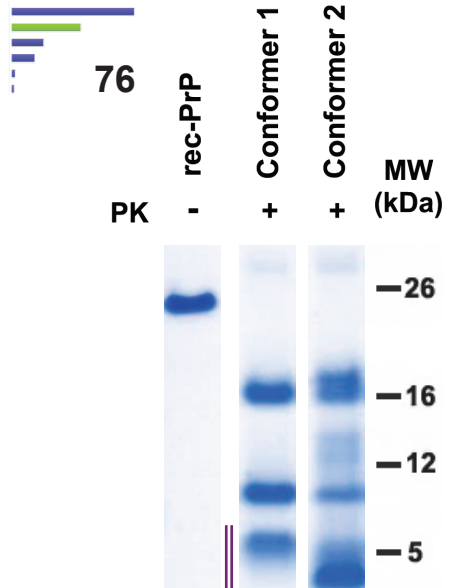

213 AA

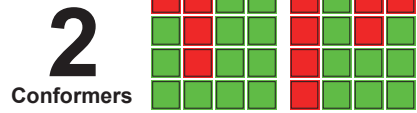

Tm<sup>Exp</sup>: ND

ΔΔG: -13.67

### *In vitro* studies

- TgVole (1x) Not tested
- Common warthog Not tested

### *In vivo* studies

- TgVole (1x) Not tested
- Common warthog Not tested

pLDDT [84.9]

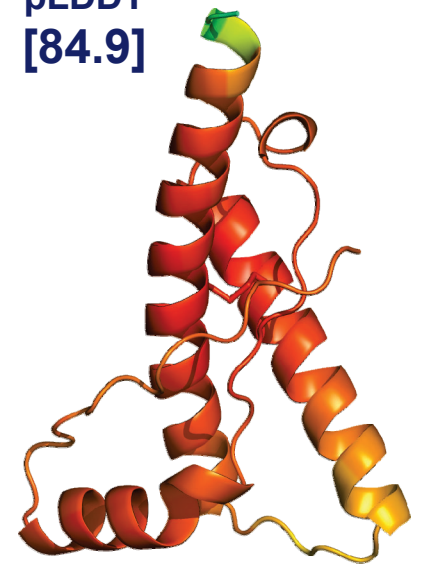

# Maxwell's duiker

GenBank: **BK064126**

P81%

71.4

## *Philantomba maxwellii*

Artiodactyla 46/50  
Bovidae 26/30

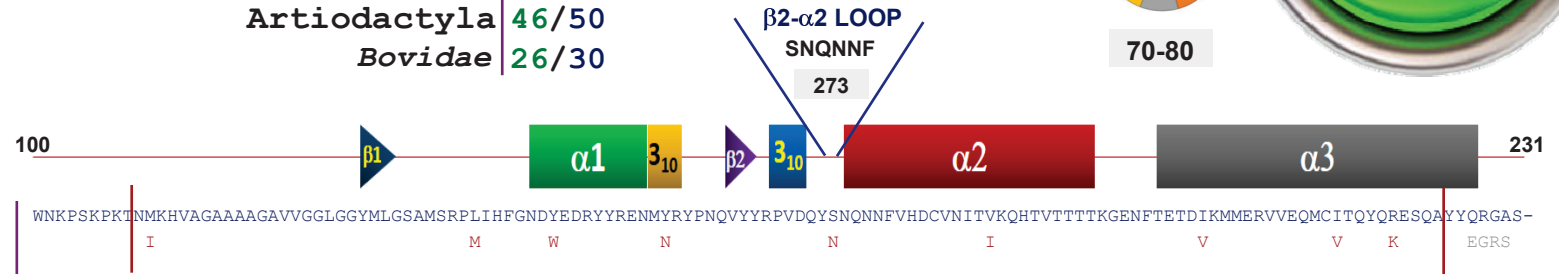

PrP sequence differs by 9 amino acids from the bank vole PrP (see in red)

No deletions  
No insertions  
No polymorphic variants found

Distinct primary sequence across species

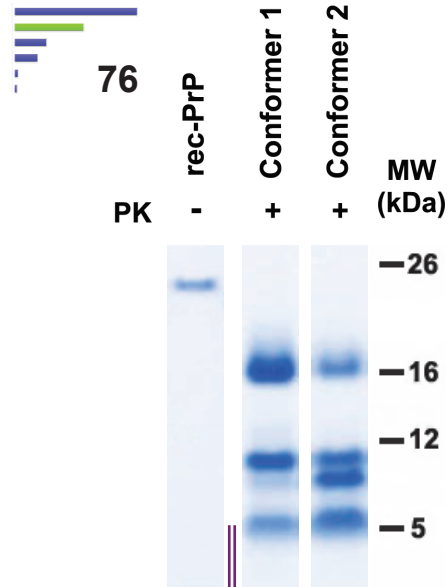

220 AA

2  
Conformers

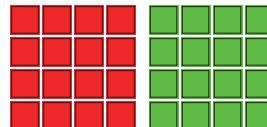

Tm<sup>Exp</sup>: ND

ΔΔG: -11.79

### *In vitro* studies

TgVole (1x) Not tested

Maxwell's duiker Not tested

### *In vivo* studies

TgVole (1x) Not tested

Maxwell's duiker Not tested

pLDDT  
[86.96]

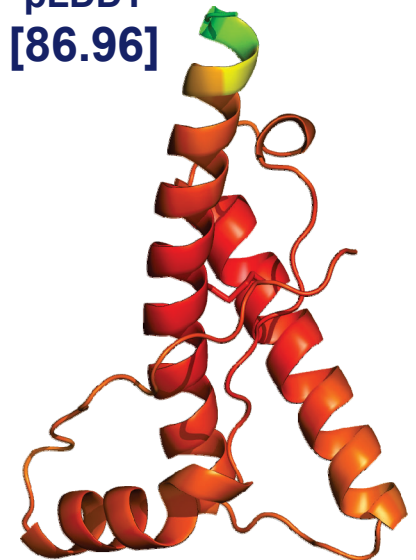

# Reindeer

GenBank: MW804583

P89%

89.3

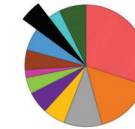

80-90

## *Rangifer tarandus*

Artiodactyla 46/50  
Cervidae 6/6

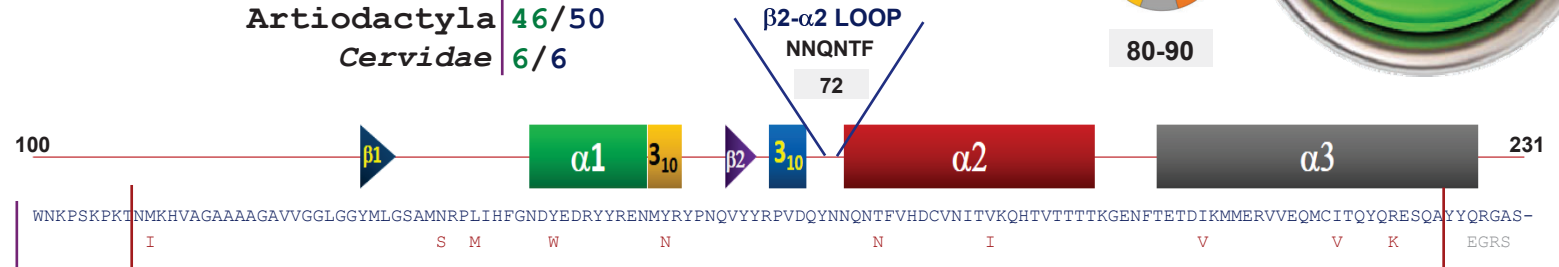

PrP sequence differs by 10 amino acids from the bank vole PrP (see in red)

No deletions  
No insertions  
It shows polymorphic variants

Distinct primary sequence across species

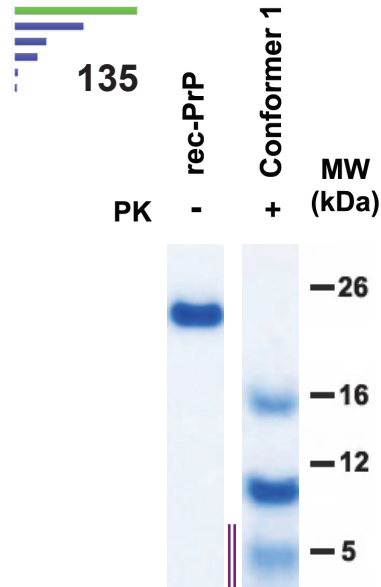

212 AA

1  
Conformers

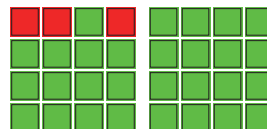

$T_m^{Exp}$ : ND  
 $\Delta\Delta G$ : -9.46

### *In vitro* studies

TgVole (1x) Not tested  
Père David's deer Not tested

### *In vivo* studies

TgVole (1x) Not tested  
Père David's deer Not tested

pLDDT  
[88.94]

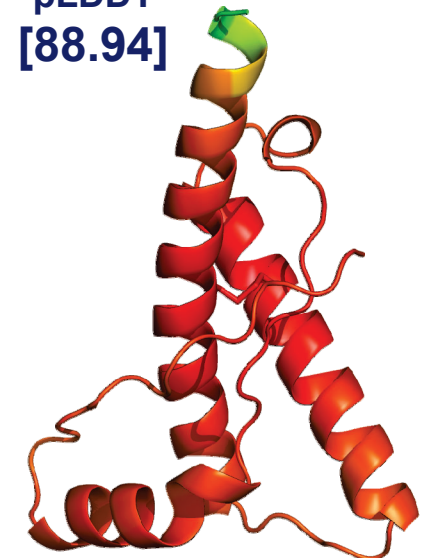



Distinct primary sequence across species

# Steenbok

GenBank: **BK064134**

P89%

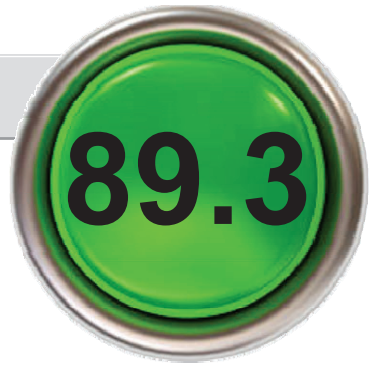

80-90

## Raphicerus campestris

Artiodactyla 46/50

Bovidae 26/30

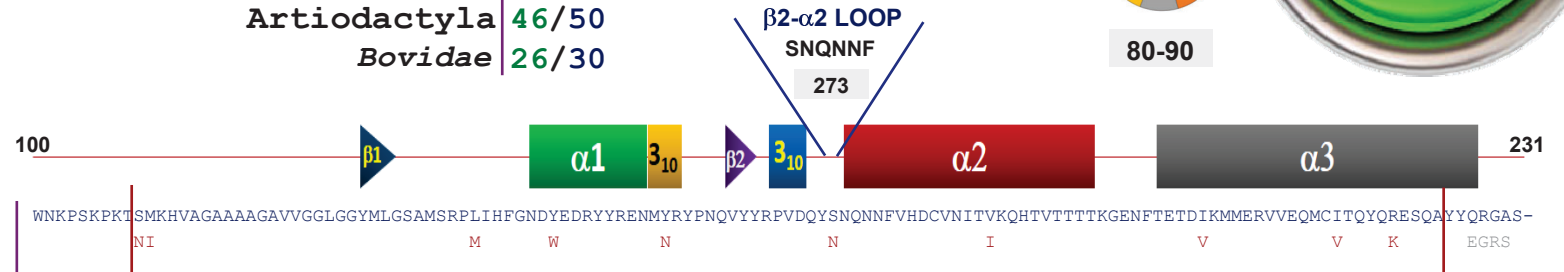

PrP sequence differs by 10 amino acids from the bank vole PrP (see in red)

- No deletions
- No insertions
- No polymorphic variants found

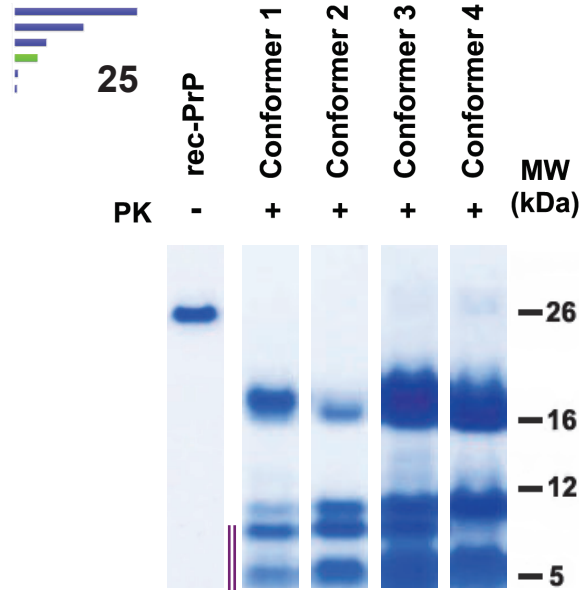

212 AA

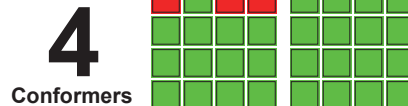

Tm<sup>Exp</sup>: ND

$\Delta\Delta$ G: -11.02

### In vitro studies

- TgVole (1x) Not tested
- Steenbok Not tested

### In vivo studies

- TgVole (1x) Not tested
- Steenbok Not tested

pLDDT [86.41]

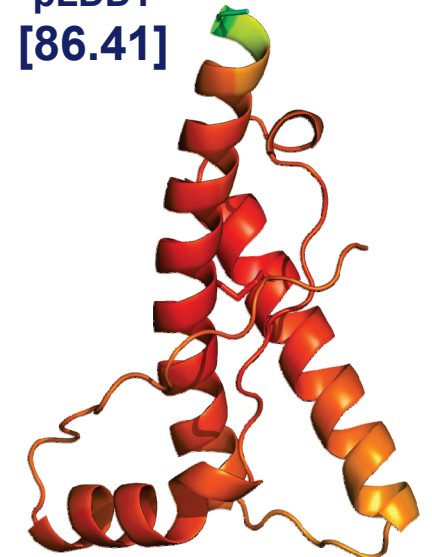

# Bohor reedbuck

GenBank: **BK064135**

P29%



0

## *Redunca redunca*

Artiodactyla 46/50

Bovidae 26/30

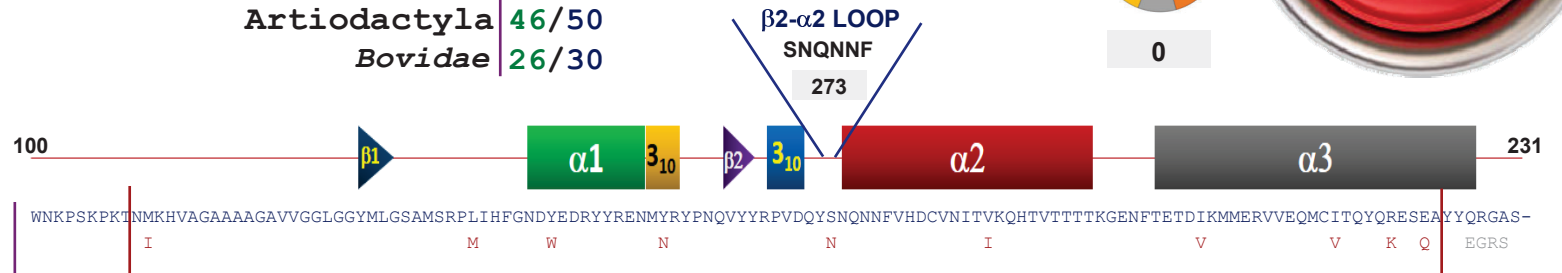

PrP sequence differs by 10 amino acids from the bank vole PrP (see in red)

- No deletions
- No insertions
- No polymorphic variants found

Tm<sup>Exp</sup>: ND

ΔΔG: -14.8

Distinct primary sequence across species

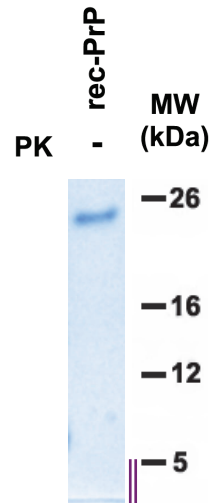

220 AA

0  
Conformers

**NO  
MISFOLDING**

*In vitro* studies

**NOT  
APPLICABLE**

*In vivo* studies

**NOT  
APPLICABLE**

pLDDT  
[87.75]

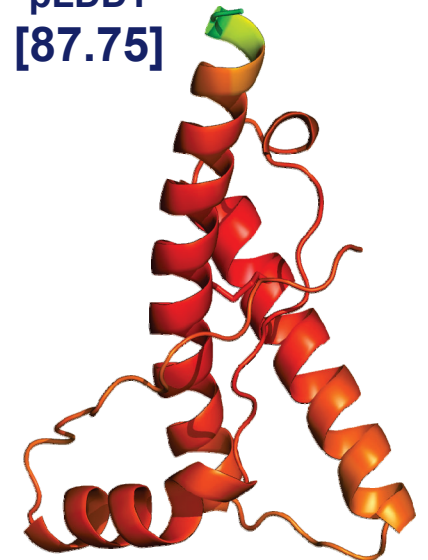

Distinct primary sequence across species

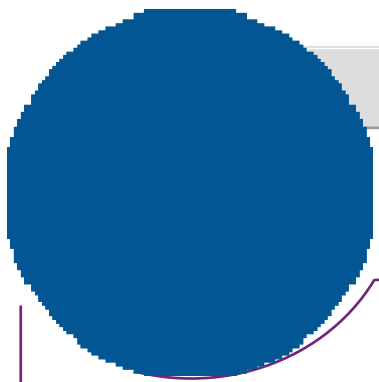

# Pig

GenBank: L07623

P78%

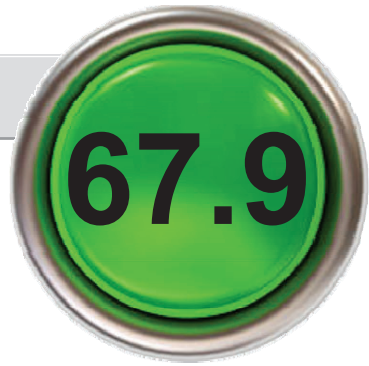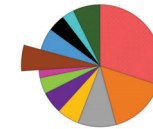

60-70

## Sus scrofa

Artiodactyla 46/50  
Suidae 3/3

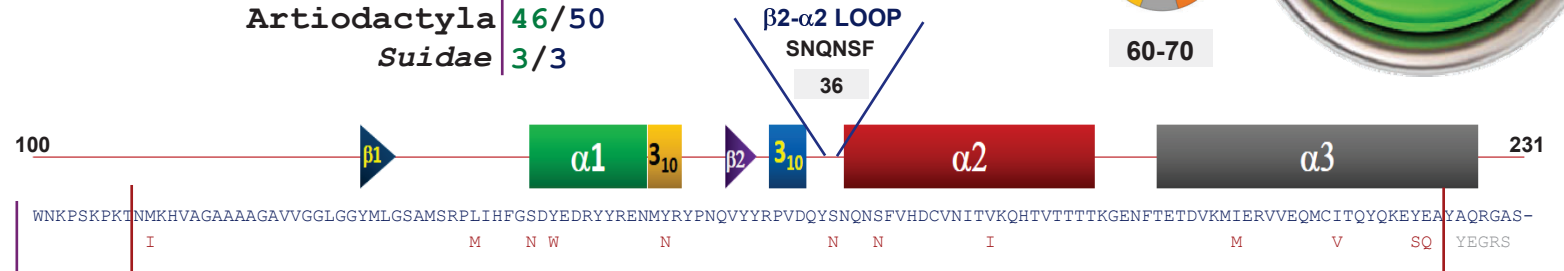

PrP sequence differs by 12 amino acids from the bank vole PrP (see in red)

- No deletions
- No insertions
- No polymorphic variants found

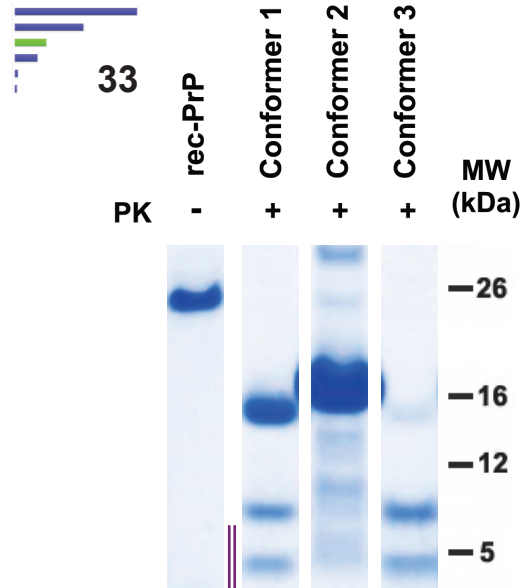

213 AA

3  
Conformers

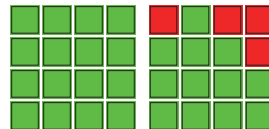

$T_m^{Exp}$ : ND

$\Delta\Delta G$ : -15.44

### In vitro studies

- TgVole (1x) Propagate
- Pig Ongoing

### In vivo studies

- TgVole (1x) Infectious
- TgPig Not tested

pLDDT [85.4]

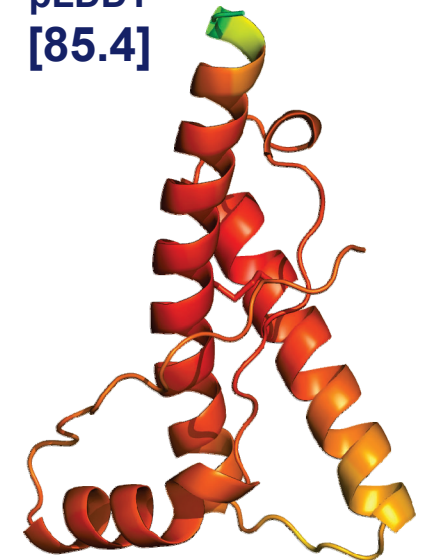

# Common duiker

GenBank: **BK064038**

**P58%**

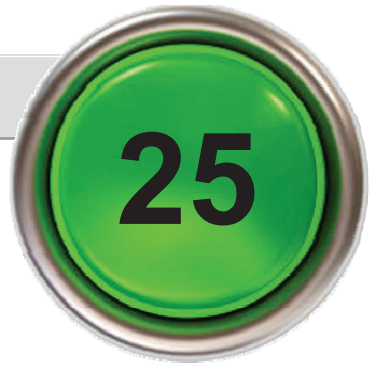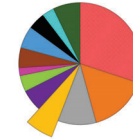

20-30

## *Sylvicapra grimmia*

Artiodactyla **46/50**  
Bovidae **26/30**

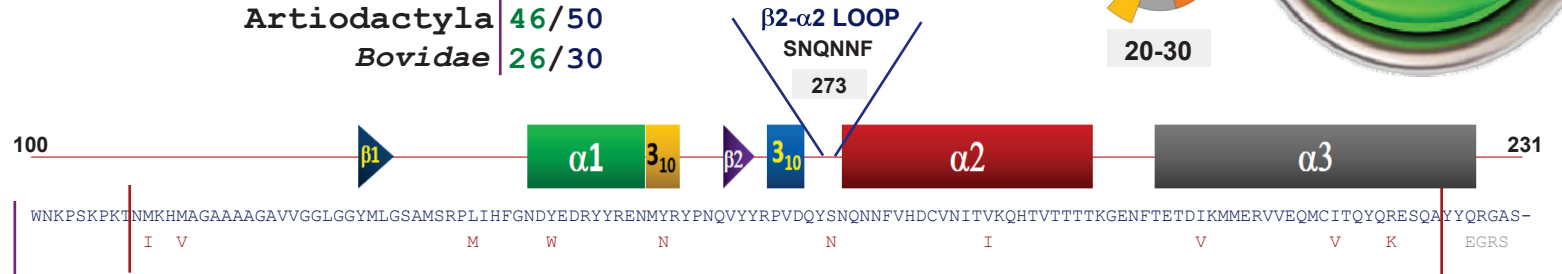

PrP sequence differs by 10 amino acids from the bank vole PrP (see in red)

No deletions  
No insertions  
No polymorphic variants found

Distinct primary sequence across species

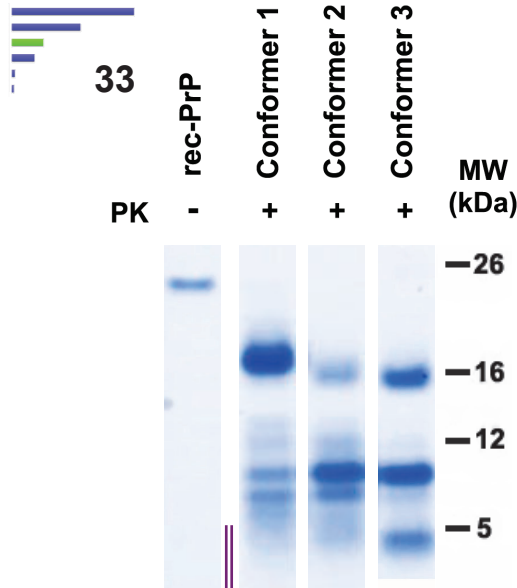

220 AA

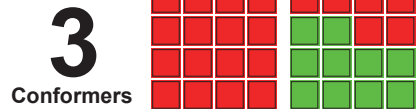

Tm<sup>Exp</sup>: ND

ΔΔG: **-12.74**

### *In vitro* studies

TgVole (1x) Not tested  
Common duiker Not tested

### *In vivo* studies

TgVole (1x) Not tested  
Common duiker Not tested

pLDDT  
**[88.84]**

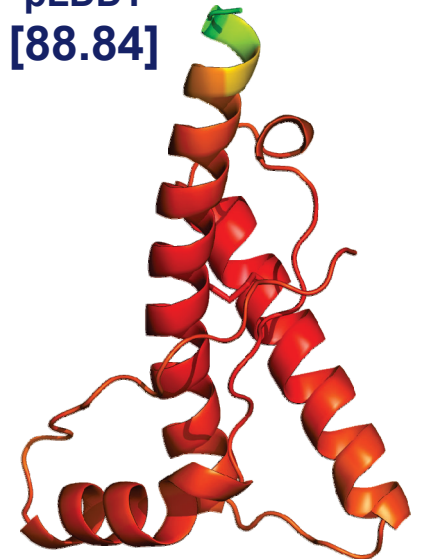

# African buffalo

GenBank: AY720686

P83%

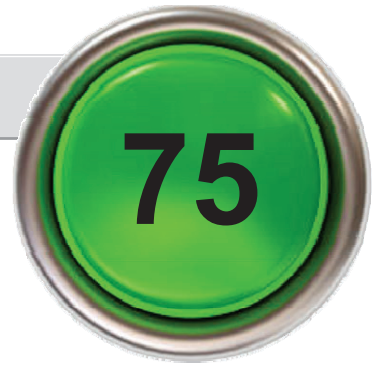

70-80

## *Syncerus caffer*

Artiodactyla 46/50  
Bovidae 26/30

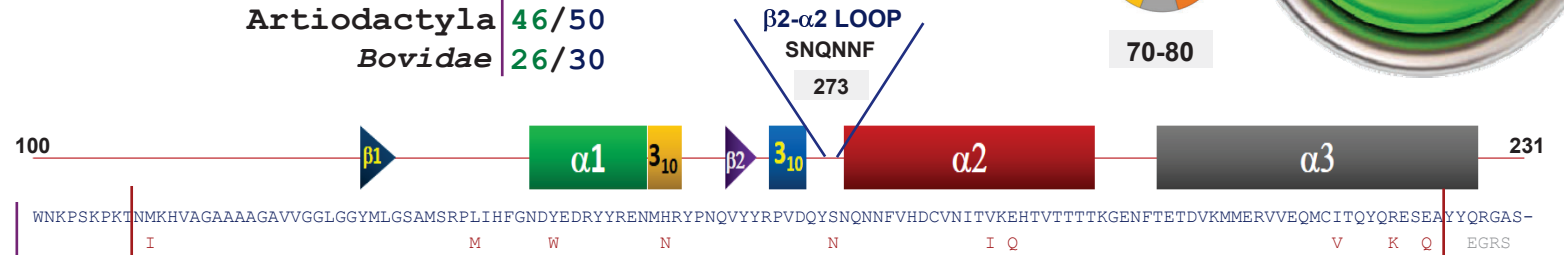

PrP sequence differs by 10 amino acids from the bank vole PrP (see in red)

No deletions  
No insertions  
No polymorphic variants found

Distinct primary sequence across species

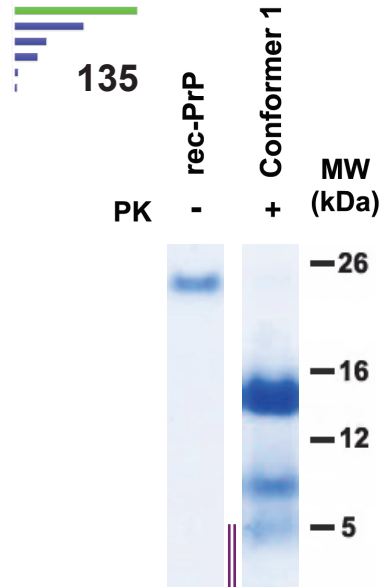

220 AA

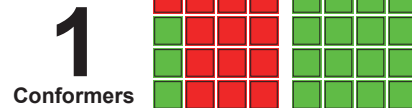

Tm<sup>Exp</sup>: ND

ΔΔG: -10.06

### *In vitro* studies

TgVole (1x) Not tested

African buffalo Not tested

### *In vivo* studies

TgVole (1x) Not tested

African buffalo Not tested

pLDDT [89.22]

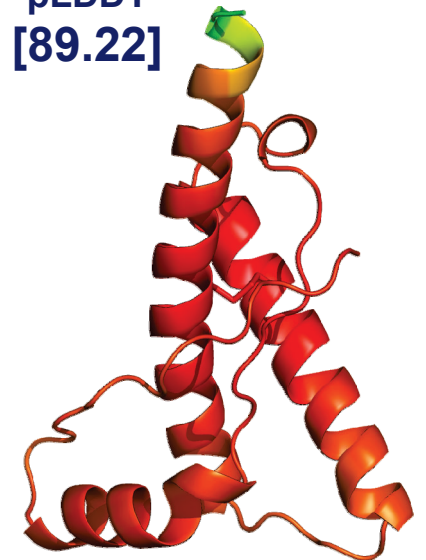

Distinct primary sequence across species

# Common eland

GenBank: EF165082

P81%

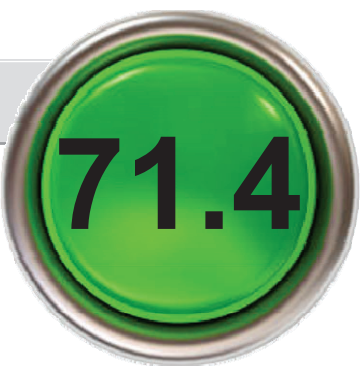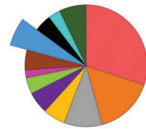

70-80

## Taurotragus oryx

Artiodactyla 46/50  
Bovidae 26/30

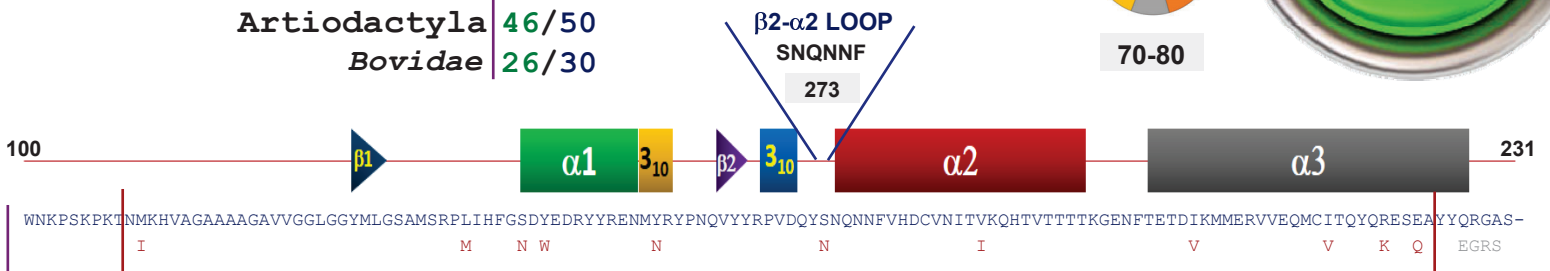

PrP sequence differs by 11 amino acids from the bank vole PrP (see in red)

No deletions  
No insertions  
No polymorphic variants found

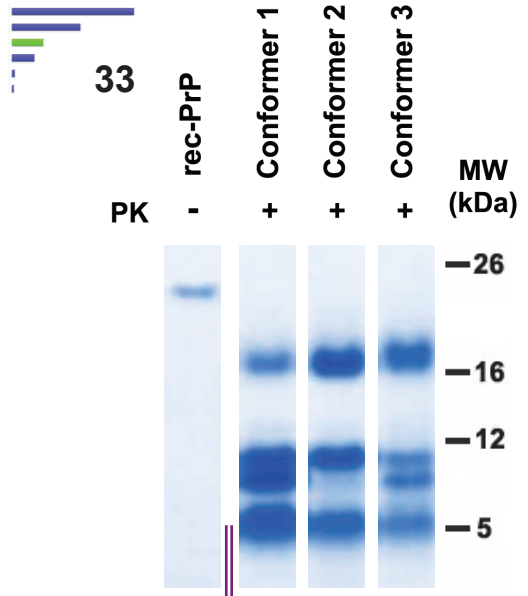

220 AA

3  
Conformers

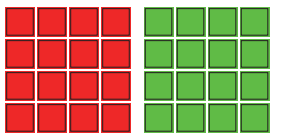

Tm<sup>Exp</sup>: ND  
ΔΔG: -24.41

### In vitro studies

TgVole (1x) Not tested  
Common eland Not tested

### In vivo studies

TgVole (1x) Not tested  
Common eland Not tested

pLDDT [92.23]

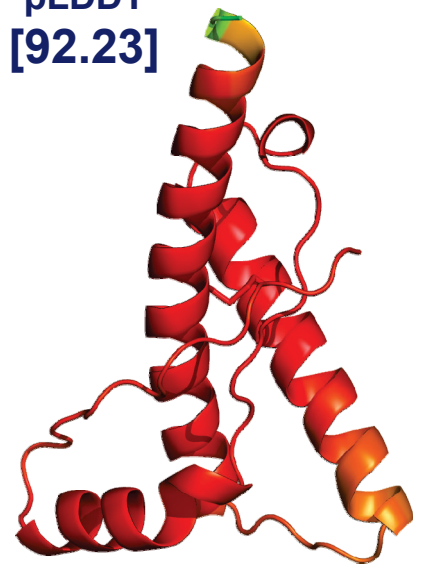

Distinct primary sequence across species

# Lowland nyala

GenBank: EU032296

## Tragelaphus angasii

Artiodactyla 46/50  
Bovidae 26/30

P90%

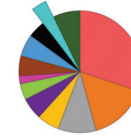

90-100

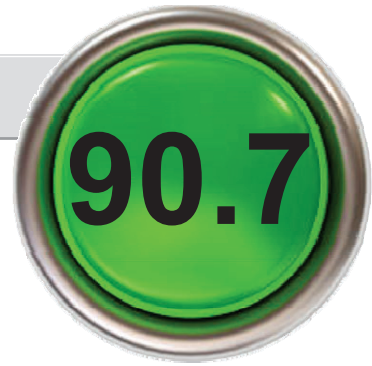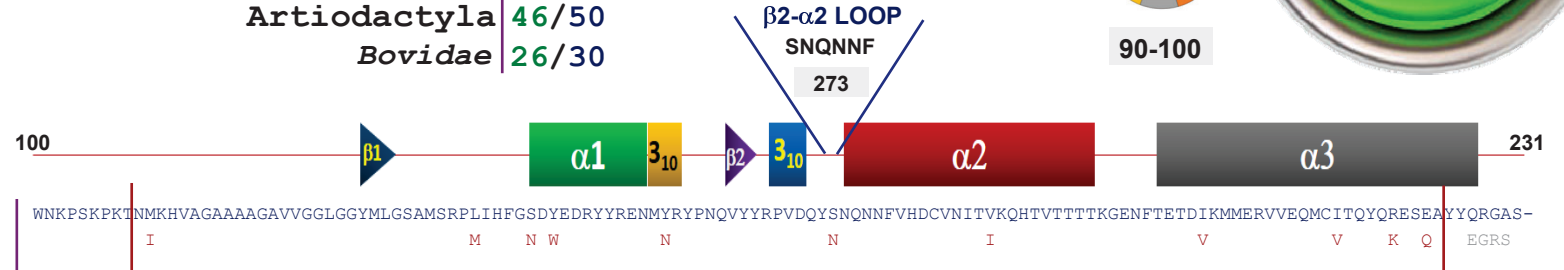

PrP sequence differs by 11 amino acids from the bank vole PrP (see in red)

- No deletions
- No insertions
- No polymorphic variants found

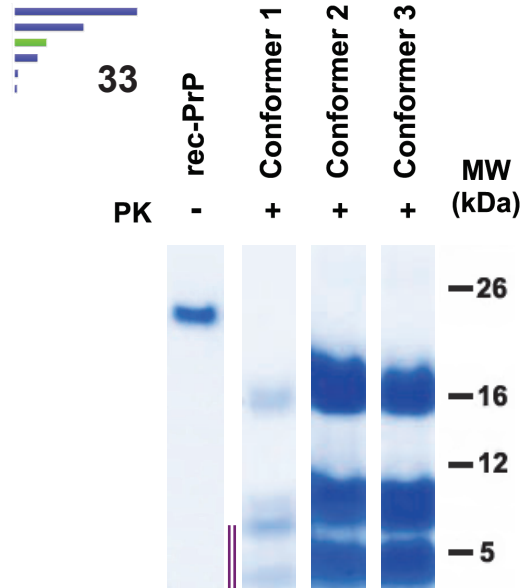

212 AA

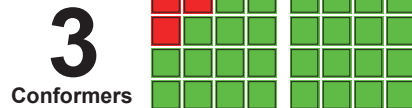

Tm<sup>Exp</sup>: ND  
ΔΔG: -10.1

### In vitro studies

- TgVole (1x) Not tested
- Lowland nyala Not tested

### In vivo studies

- TgVole (1x) Not tested
- Lowland nyala Not tested

pLDDT [86.58]

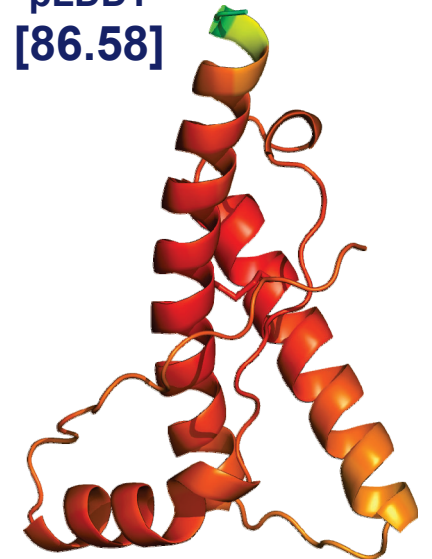

# Mountain nyala

GenBank: **BK064065**

*Tragelaphus buxtoni*

Artiodactyla 46/50  
Bovidae 26/30

P29%

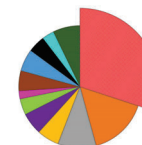

0

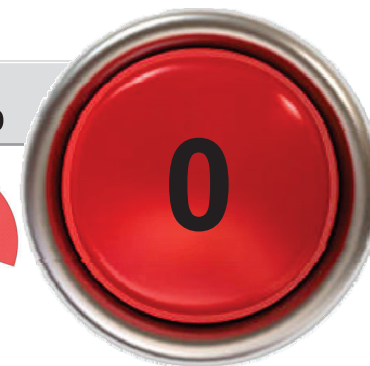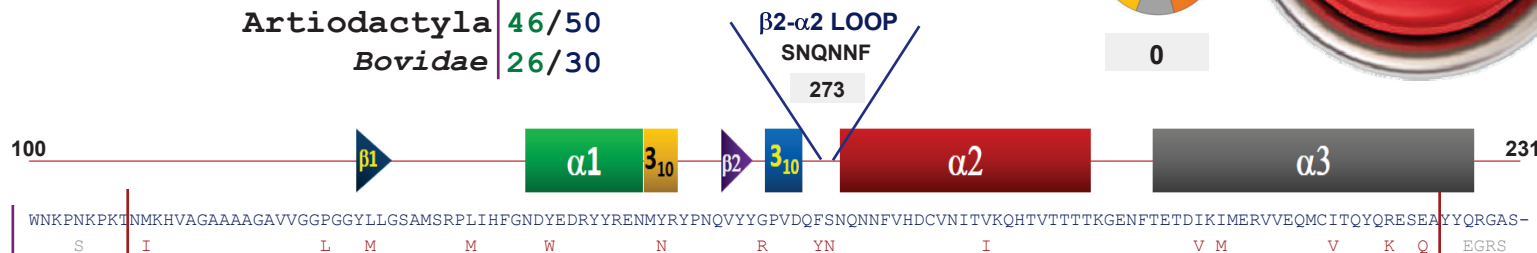

PrP sequence differs by 15 amino acids from the bank vole PrP (see in red)

- No deletions
- No insertions
- No polymorphic variants found

Tm<sup>Exp</sup>: ND

ΔΔG: **-13.61**

Distinct primary sequence across species

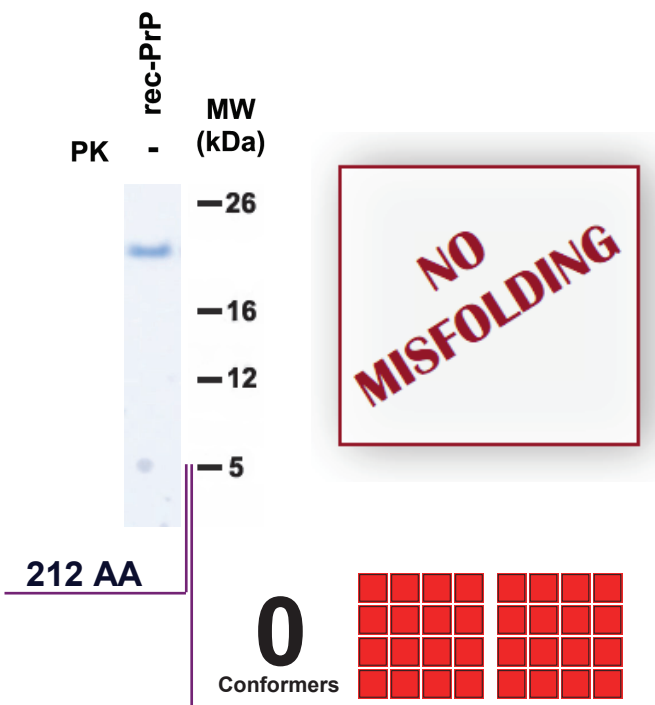

*In vitro* studies

NOT APPLICABLE

*In vivo* studies

NOT APPLICABLE

pLDDT [87.79]

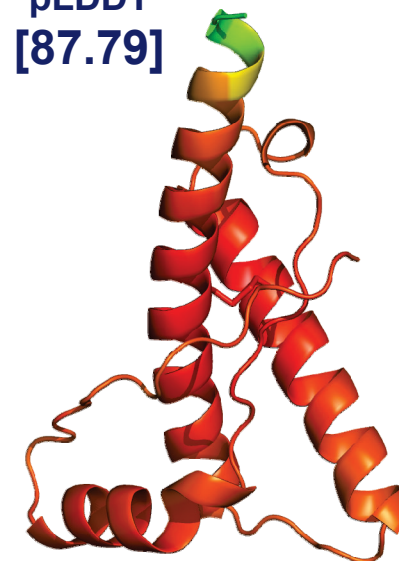



# Lesser kudu

GenBank: AY720704

P69%

44.6

## Tragelaphus imberbis

Artiodactyla 46/50  
Bovidae 26/30

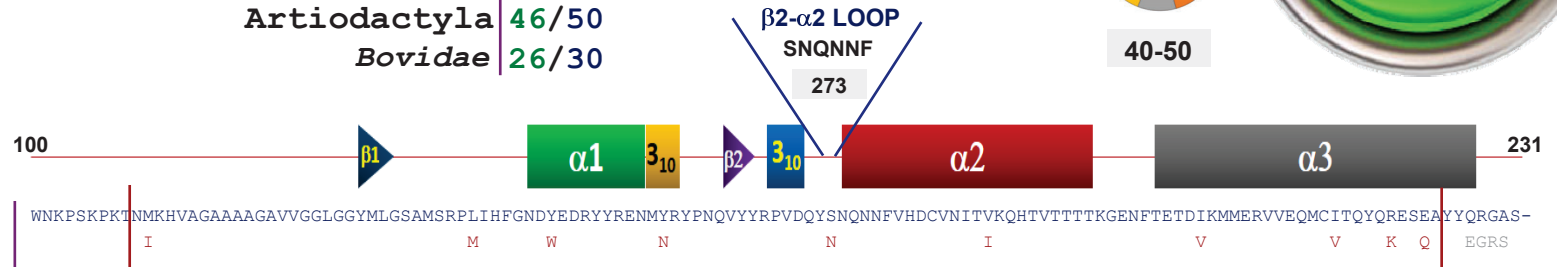

PrP sequence differs by 10 amino acids from the bank vole PrP (see in red)

No deletions  
No insertions  
No polymorphic variants found

Distinct primary sequence across species

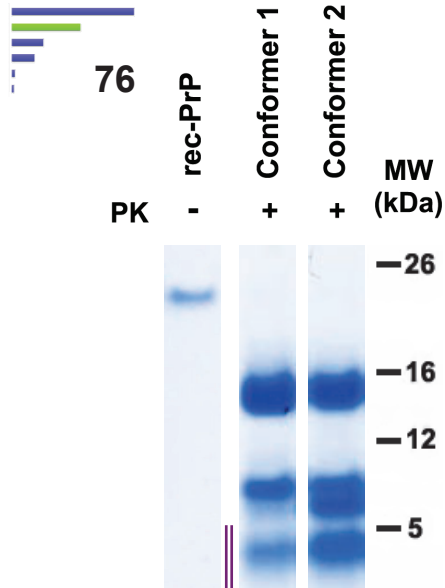

220 AA

2  
Conformers

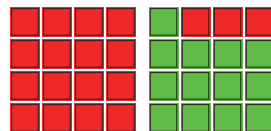

Tm<sup>Exp</sup>: ND

ΔΔG: -12.32

### In vitro studies

TgVole (1x) Not tested  
Lesser kudu Not tested

### In vivo studies

TgVole (1x) Not tested  
Lesser kudu Not tested

pLDDT [86.01]

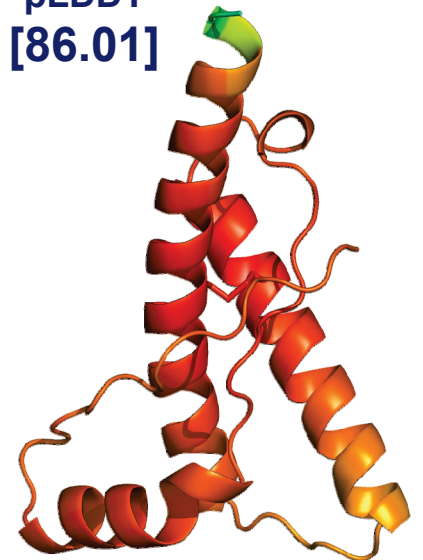

# Harnessed bushbuck

GenBank: **BK063937**

P66%

**36.8**



30-40

## *Tragelaphus scriptus*

Artiodactyla **46/50**  
Bovidae **26/30**

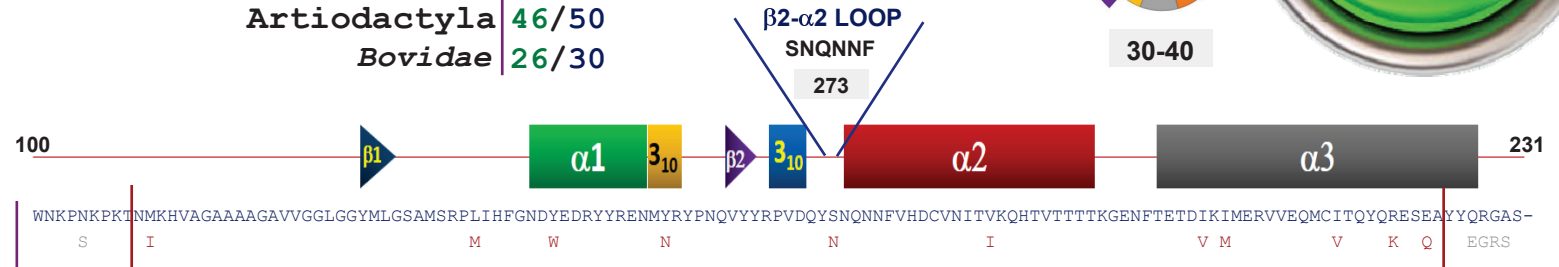

PrP sequence differs by 11 amino acids from the bank vole PrP (see in red)

No deletions  
No insertions  
No polymorphic variants found

Distinct primary sequence across species

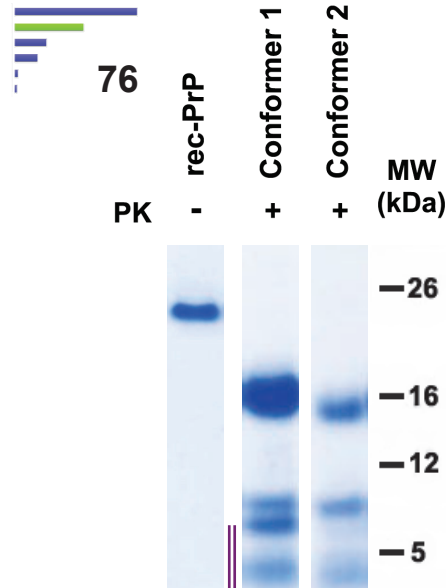

212 AA

**2**  
Conformers

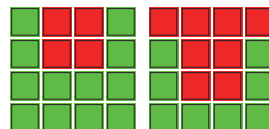

Tm<sup>Exp</sup>: ND

ΔΔG: **-15.56**

### *In vitro* studies

TgVole (1x) Not tested  
Harnessed bushbuck Not tested

### *In vivo* studies

TgVole (1x) Not tested  
Harnessed bushbuck Not tested

pLDDT  
**[87.56]**

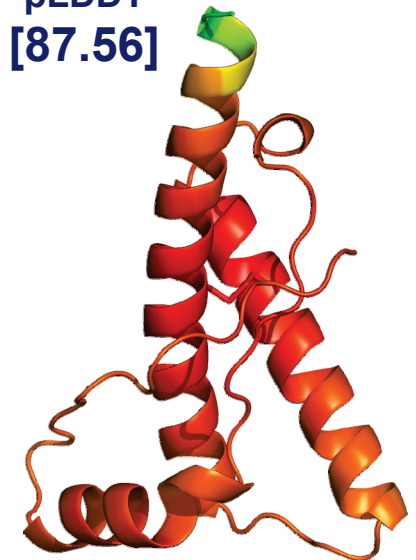

1 species sharing the same primary sequence

# Sitatunga

GenBank: EF165083

P83%

76.8

## Tragelaphus spekii

Artiodactyla 46/50  
Bovidae 26/30

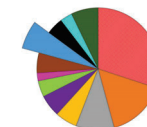

70-80

Bongo  
*Tragelaphus eurycerus*

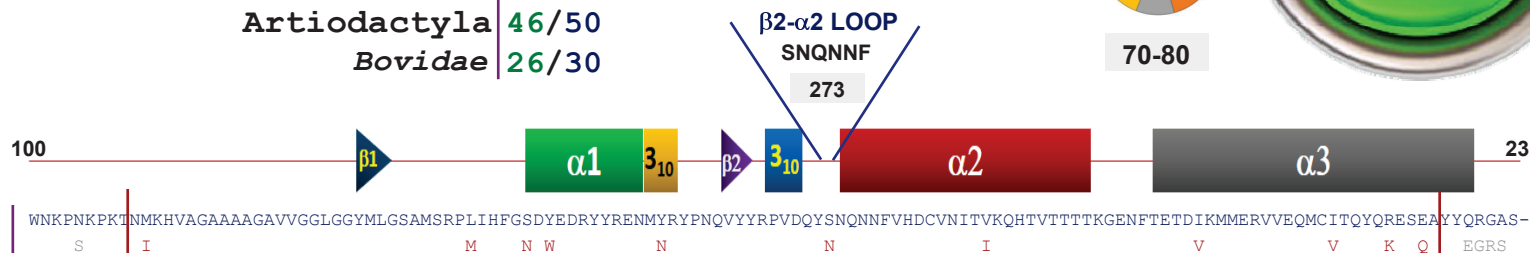

PrP sequence differs by 11 amino acids from the bank vole PrP (see in red)

- No deletions
- No insertions
- No polymorphic variants found

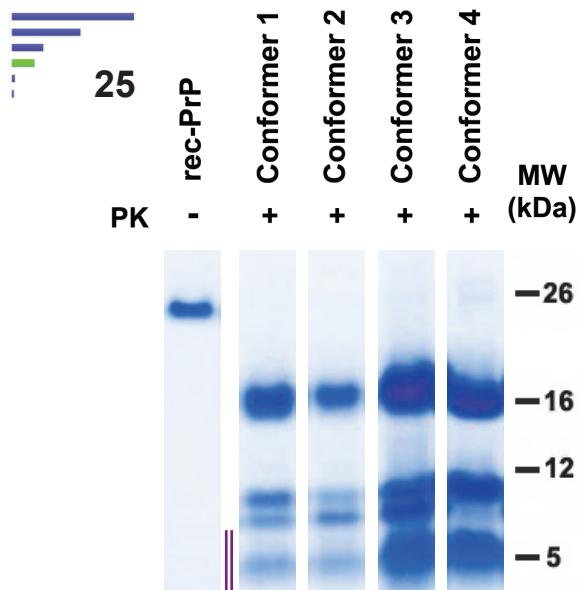

212 AA

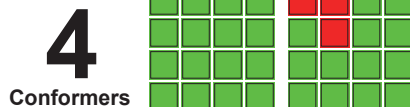

Tm<sup>Exp</sup>: ND

ΔΔG: -10.2

### In vitro studies

|             |            |
|-------------|------------|
| TgVole (1x) | Not tested |
| Sitatunga   | Not tested |

### In vivo studies

|             |            |
|-------------|------------|
| TgVole (1x) | Not tested |
| Sitatunga   | Not tested |

pLDDT [89.28]

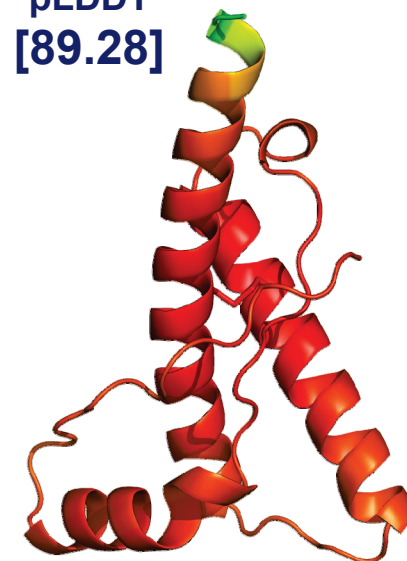

# Greater kudu

GenBank: EF165081

P64%

33.9



30-40

## Tragelaphus strepsiceros

Artiodactyla 46/50  
Bovidae 26/30

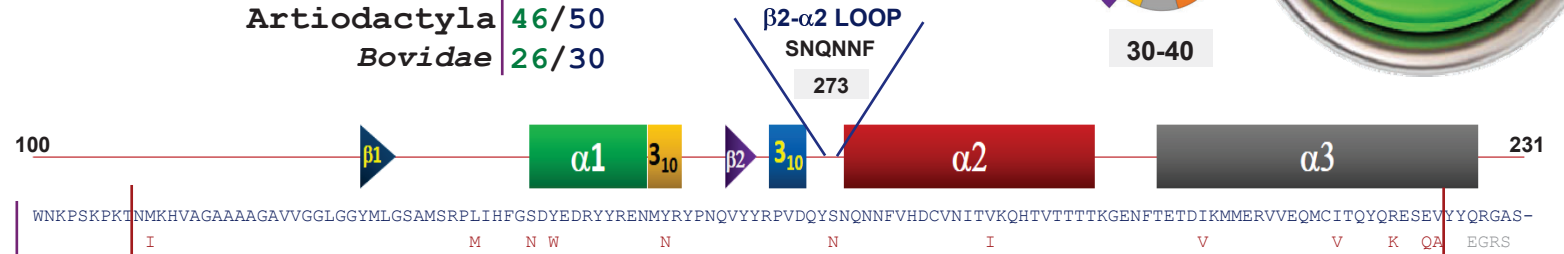

PrP sequence differs by 12 amino acids from the bank vole PrP (see in red)

No deletions  
No insertions  
It shows polymorphic variants

Distinct primary sequence across species

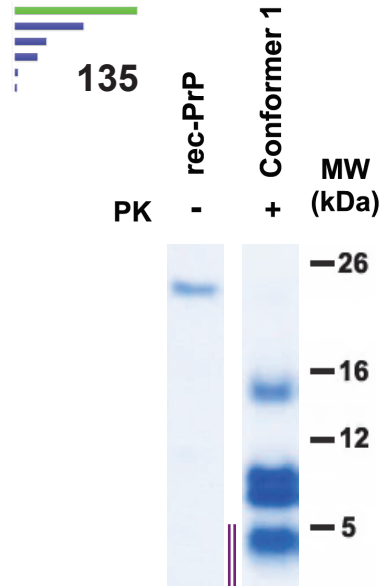

220 AA

1  
Conformers

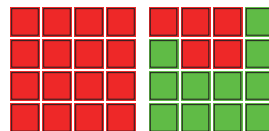

Tm<sup>Exp</sup>: ND

ΔΔG: -14.67

### In vitro studies

TgVole (1x) Not tested

Greater kudu Not tested

### In vivo studies

TgVole (1x) Not tested

Greater kudu Not tested

pLDDT [86.72]

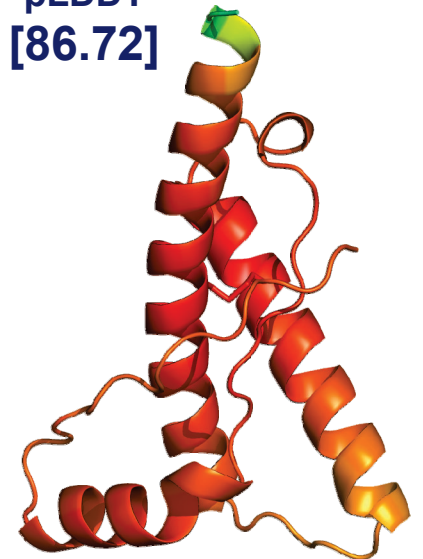

# Java mouse-deer

GenBank: **BK064004**

P100%

100



100

## Tragulus javanicus

Artiodactyla 46/50  
Tragulidae 1/1

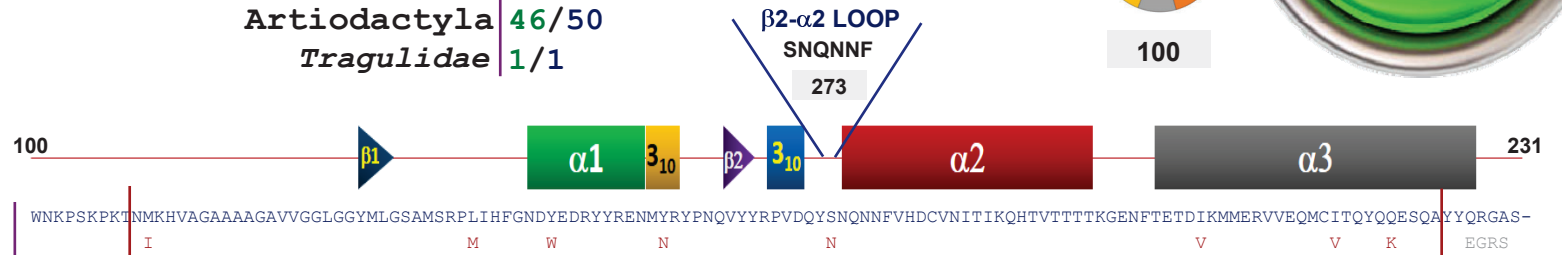

PrP sequence differs by 8 amino acids from the bank vole PrP (see in red)

No deletions  
No insertions  
No polymorphic variants found

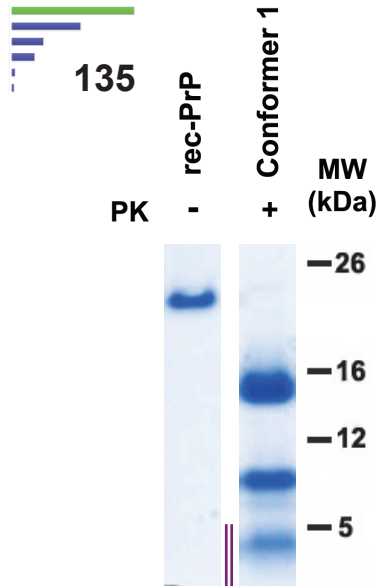

211 AA

1  
Conformers

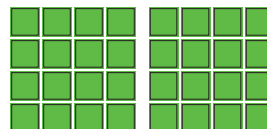

Tm<sup>Exp</sup>: ND

ΔΔG: -12.57

### In vitro studies

TgVole (1x) Not tested

Java mouse-deer Not tested

### In vivo studies

TgVole (1x) Not tested

Java mouse-deer Not tested

pLDDT  
[85.83]

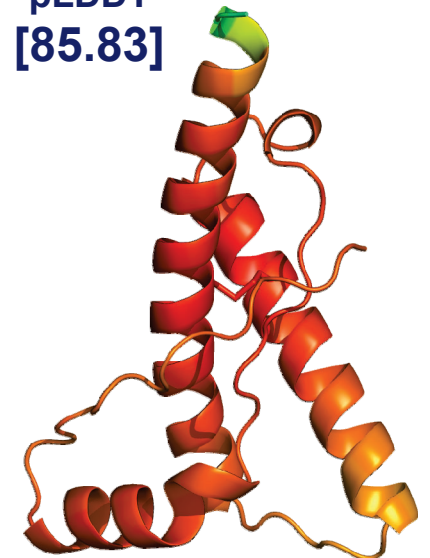

1 species sharing the same primary sequence

Lesser mouse-deer  
*Tragulus kanchil*

2 species sharing the same primary sequence

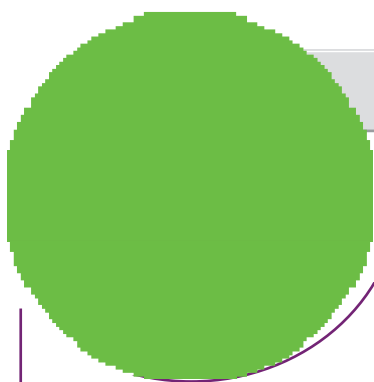

# Vicuna

GenBank: **BK063925**

P47%

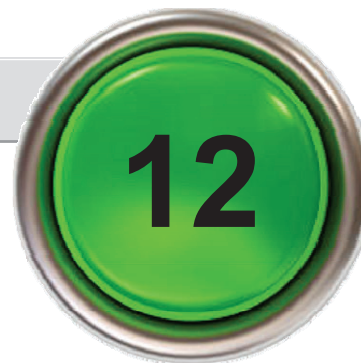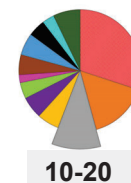

## Vicugna vicugna

Artiodactyla 46/50

Camelidae 2/2

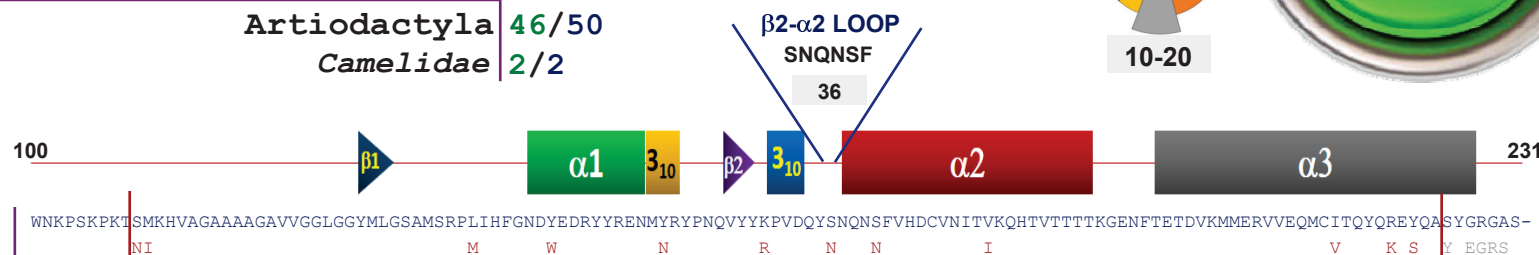

PrP sequence differs by 12 amino acids from the bank vole PrP (see in red)

- No deletions
- No insertions
- No polymorphic variants found

**Guanaco**  
*Lama glama cacsilensis*

**Alpaca**  
*Vicugna pacos*

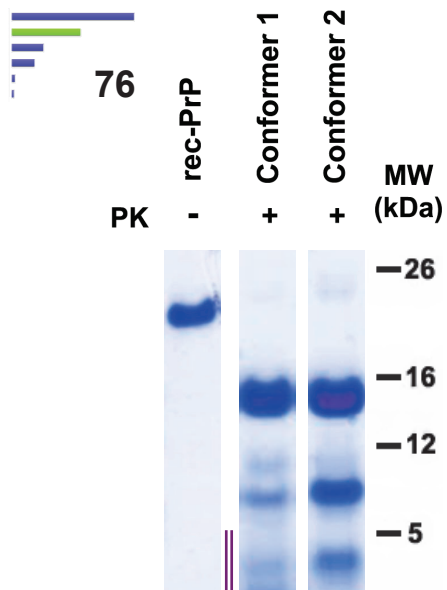

212 AA

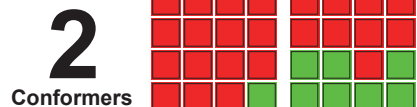

Tm<sup>Exp</sup>: ND  
 $\Delta\Delta G$ : -7.28

### In vitro studies

|             |            |
|-------------|------------|
| TgVole (1x) | Not tested |
| Vicuna      | Not tested |

### In vivo studies

|             |            |
|-------------|------------|
| TgVole (1x) | Not tested |
| Vicuna      | Not tested |

pLDDT [85.91]

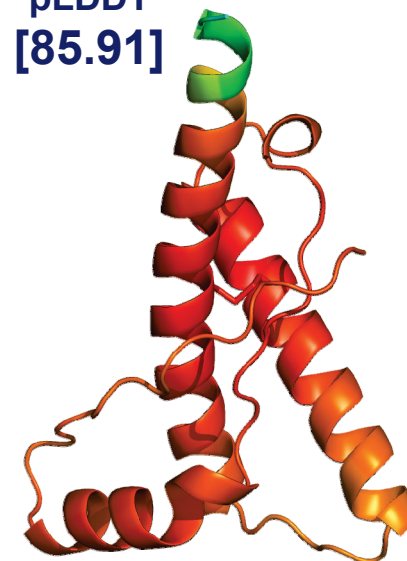

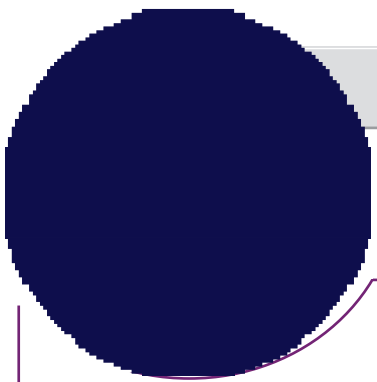

# Dog

GenBank: KY649563

*Canis lupus familiaris*

Carnivora 36/41  
Canidae 5/5

P87%

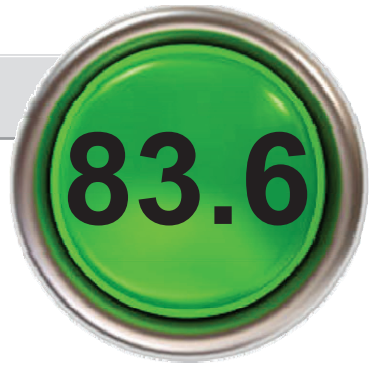

80-90

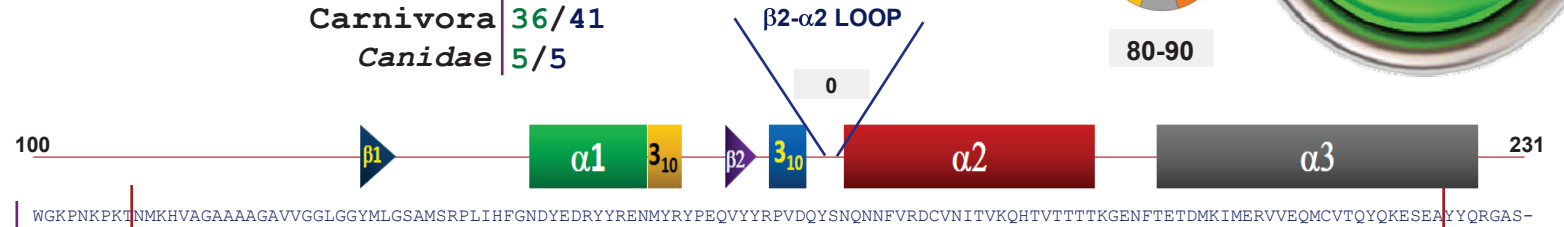

PrP sequence differs by 0 amino acids from the bank vole PrP (see in red)

No deletions  
No insertions  
It shows polymorphic variants

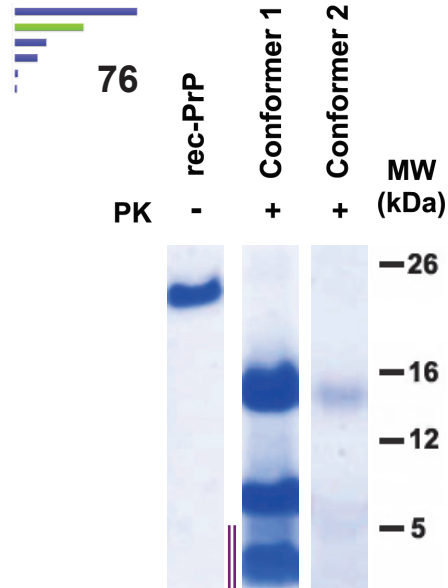

213 AA

2 Conformers

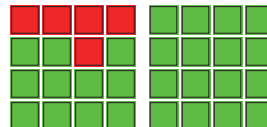

Tm<sup>Exp</sup>: ND

ΔΔG: -2.04

### In vitro studies

TgVole (1x) **Propagate**

Dog **Ongoing**

### In vivo studies

TgVole (1x) **Infectious**

TgDog **Ongoing**

pLDDT [84.93]

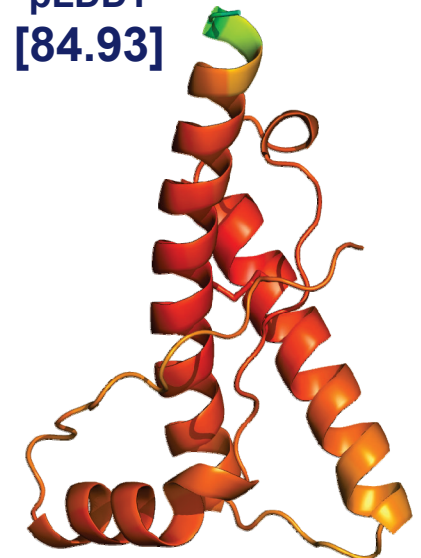

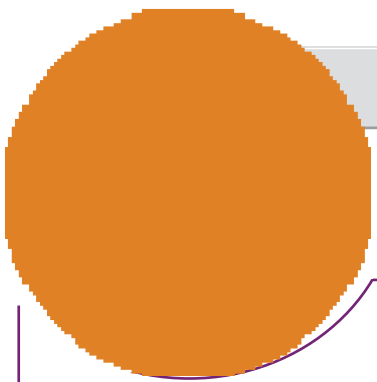

# Ferret

GenBank: **BK064943**

P100%

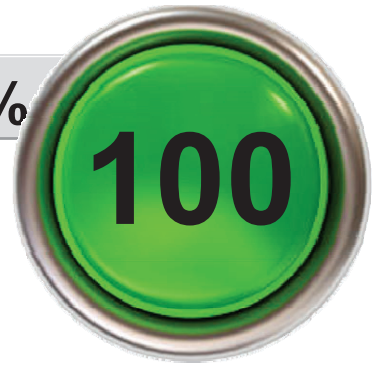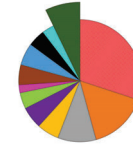

100

## *Mustela putorius*

Carnivora 36/41  
Mustelidae 5/5

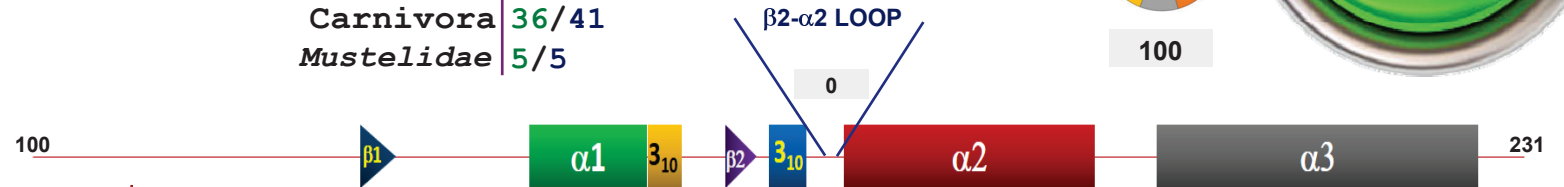

WGKPSKPKTNIKHVAGAAAAGAVVGGGLGGYMLGSAMSRPLIHFGNDYEDRYRENMYRYPNQVYYKPVVDQYSNQNNFVHDCVNIIVKQHTVTTTTTKGENFTETDMKIMERVEVQMCVTQYQQESEAYYQRGAS-

PrP sequence differs by 0 amino acids from the bank vole PrP (see in red)

No deletions  
No insertions  
It shows polymorphic variants

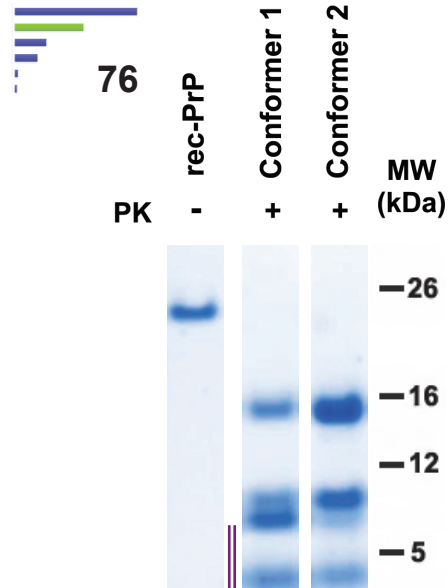

213 AA

2 Conformers

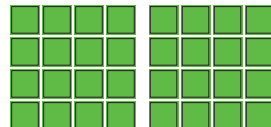

Tm<sup>Exp</sup>: ND

ΔΔG: -8.29

### *In vitro* studies

|             |           |
|-------------|-----------|
| TgVole (1x) | Propagate |
| Ferret      | Ongoing   |

### *In vivo* studies

|             |            |
|-------------|------------|
| TgVole (1x) | Ongoing    |
| Ferret      | Not tested |

pLDDT [85.37]

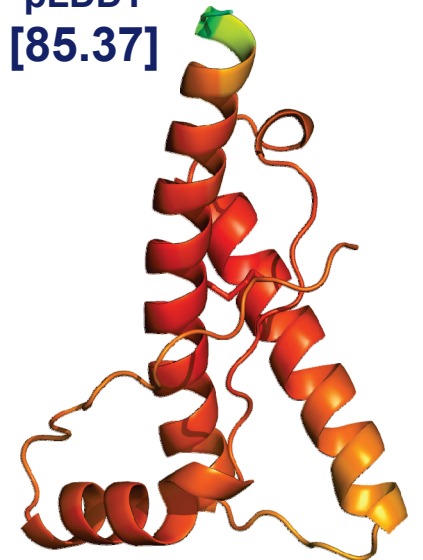



# Red panda

GenBank: EU341495

P78%

67.9



60-70

## *Ailurus fulgens*

Carnivora 36/41  
Ailuridae 1/1

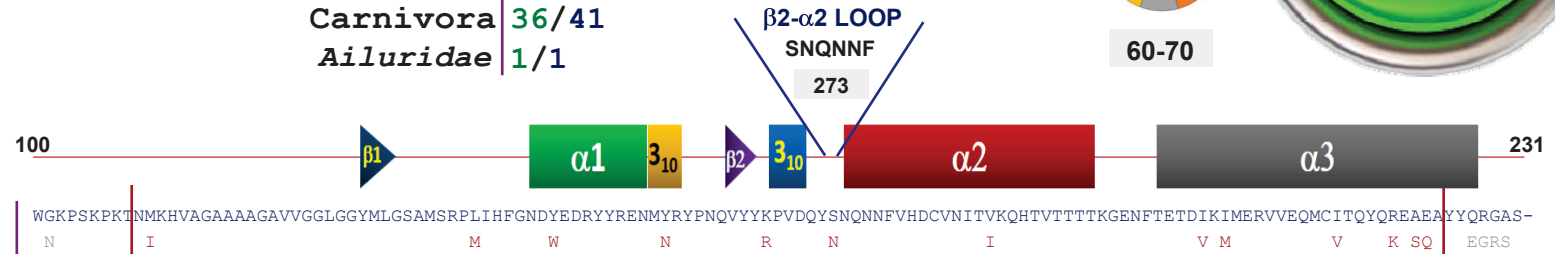

PrP sequence differs by 13 amino acids from the bank vole PrP (see in red)

No deletions  
No insertions  
No polymorphic variants found

Distinct primary sequence across species

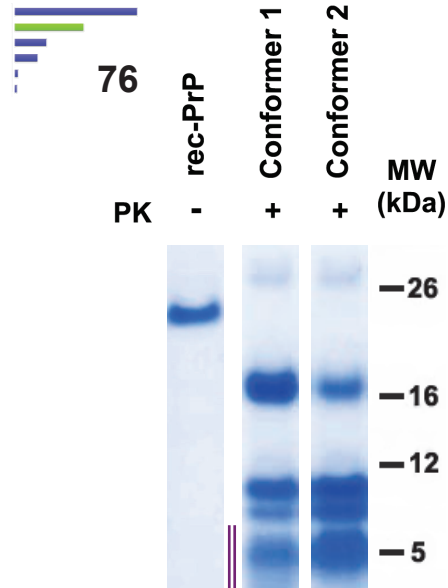

213 AA

2  
Conformers

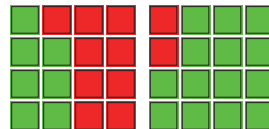

Tm<sup>Exp</sup>: ND

ΔΔG: -12.32

### *In vitro* studies

TgVole (1x) Not tested  
Red panda Not tested

### *In vivo* studies

TgVole (1x) Not tested  
Red panda Not tested

pLDDT [85.33]

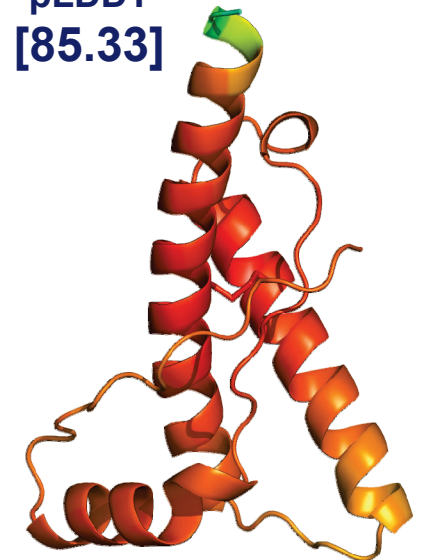

# Binturong

GenBank: JX218945

P64%

35.7

## Arctictis binturong

Carnivora 36/41  
Viverridae 1/1



30-40

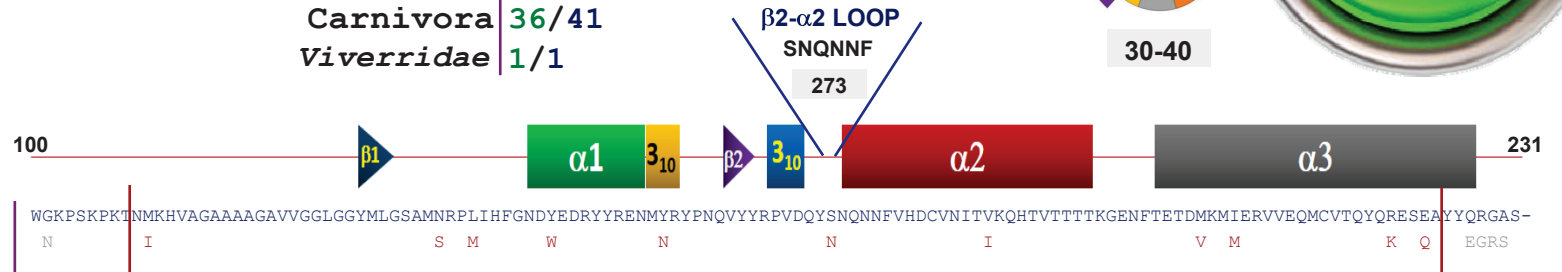

PrP sequence differs by 11 amino acids from the bank vole PrP (see in red)

- No deletions
- No insertions
- No polymorphic variants found

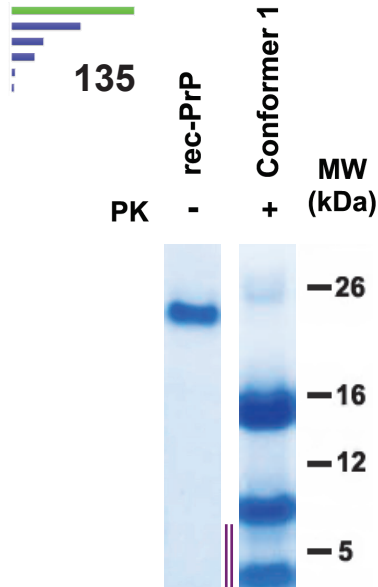

213 AA

1  
Conformers

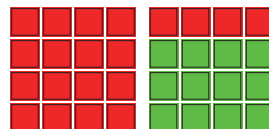

Tm<sup>Exp</sup>: ND

ΔΔG: -5.22

### In vitro studies

|             |            |
|-------------|------------|
| TgVole (1x) | Not tested |
| Binturong   | Not tested |

### In vivo studies

|             |            |
|-------------|------------|
| TgVole (1x) | Not tested |
| Binturong   | Not tested |

pLDDT [85.54]

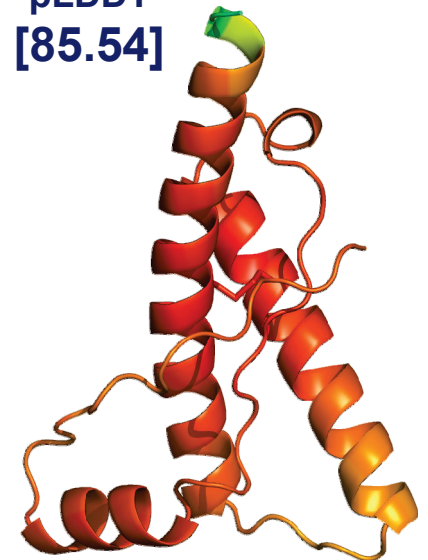

1 species sharing the same primary sequence

Asian palm civet  
*Paradoxurus hermaphroditus*

# Antarctic fur seal

GenBank: **BK064071**

P62%

32.5

## Arctocephalus gazella

Carnivora 36/41  
Otariidae 1/1



30-40

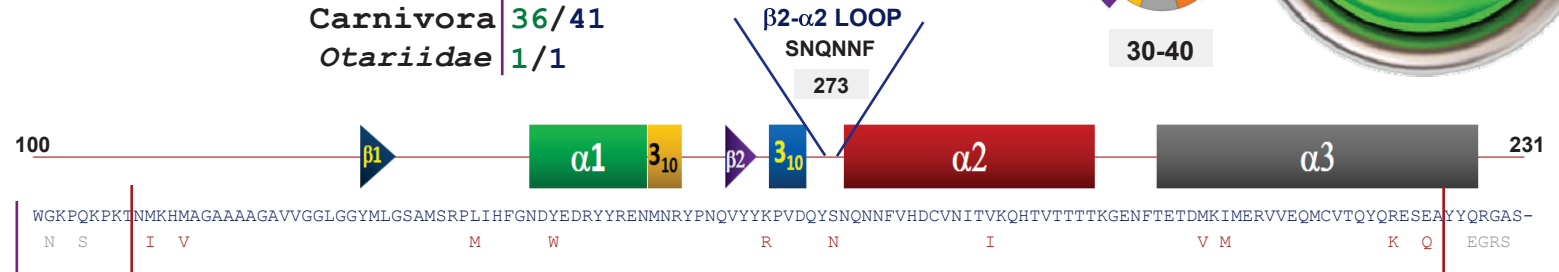

PrP sequence differs by 11 amino acids from the bank vole PrP (see in red)

No deletions  
No insertions  
No polymorphic variants found

Distinct primary sequence across species

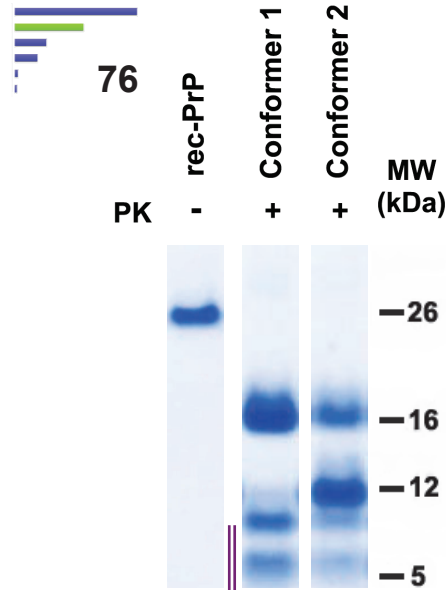

215 AA

2 Conformers

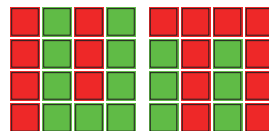

Tm<sup>Exp</sup>: ND  
ΔΔG: -11.5

### In vitro studies

TgVole (1x) Not tested  
Antarctic fur seal Not tested

### In vivo studies

TgVole (1x) Not tested  
Antarctic fur seal Not tested

pLDDT [87.29]

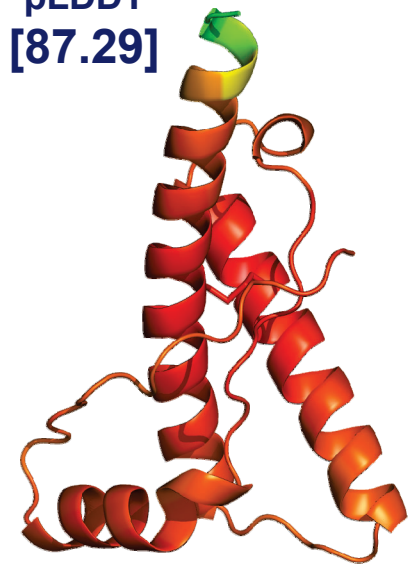

# Coyote

GenBank: JX218953

P76%

64.3



60-70

## Canis latrans

Carnivora 36/41  
Canidae 5/5

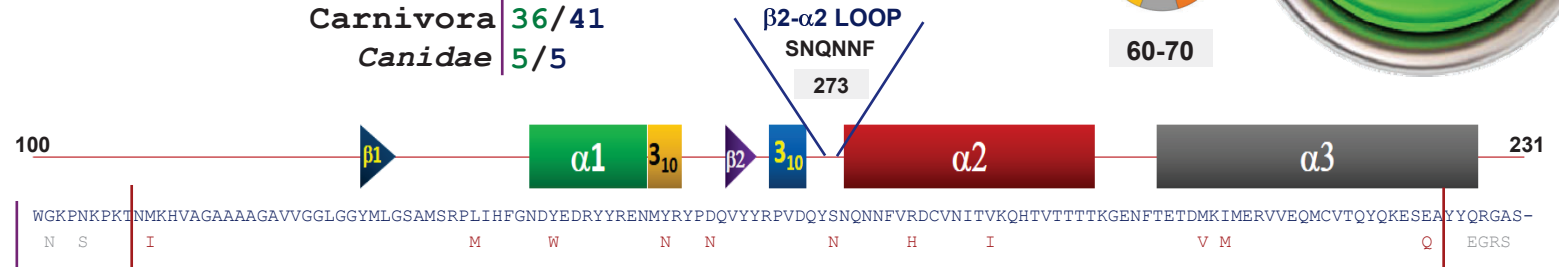

PrP sequence differs by 11 amino acids from the bank vole PrP (see in red)

No deletions  
No insertions  
No polymorphic variants found

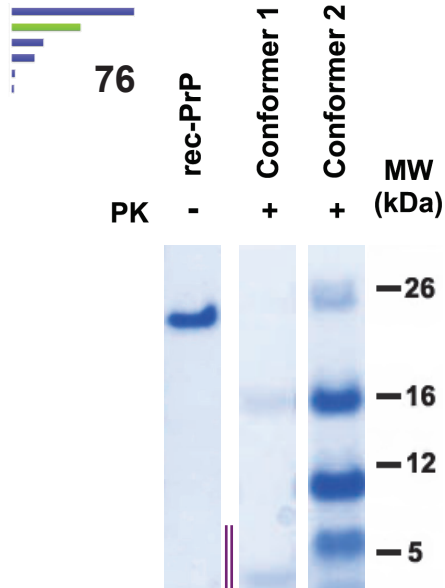

213 AA

2 Conformers

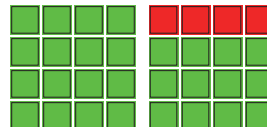

Tm<sup>Exp</sup>: ND

ΔΔG: -5.73

### In vitro studies

TgVole (1x) Not tested  
Coyote Not tested

### In vivo studies

TgVole (1x) Not tested  
Coyote Not tested

pLDDT [85.42]

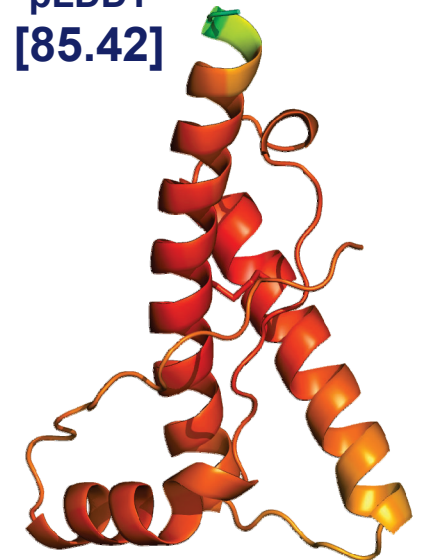

2 species sharing the same primary sequence

Maned wolf  
*Chrysocyon brachyurus*

Bush dog  
*Speothos venaticus*

# Black-backed jackal

GenBank: **BK064772**

**P57%**

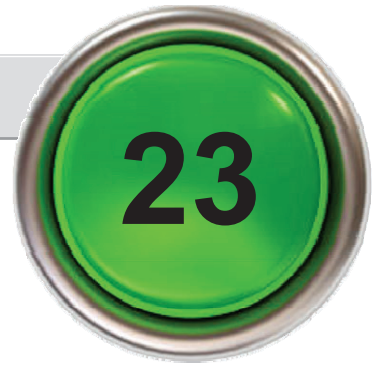

20-30

## *Canis mesomelas*

Carnivora 36/41  
Canidae 5/5

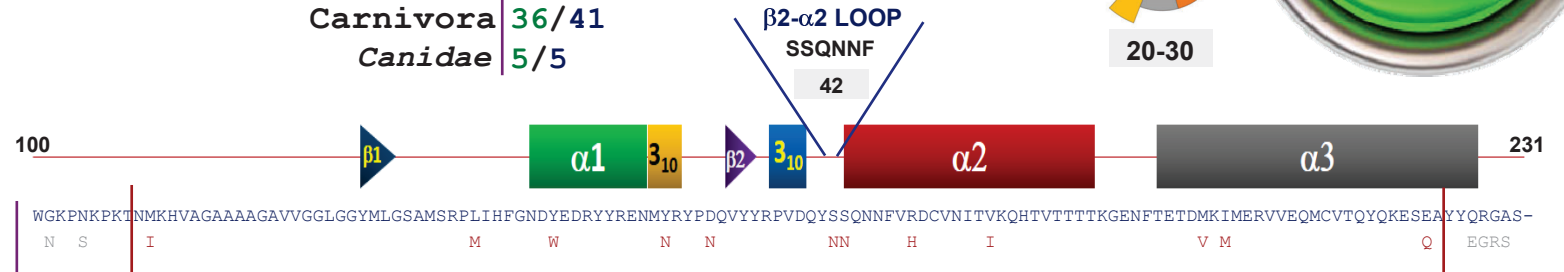

PrP sequence differs by 12 amino acids from the bank vole PrP (see in red)

No deletions  
No insertions  
No polymorphic variants found

Distinct primary sequence across species

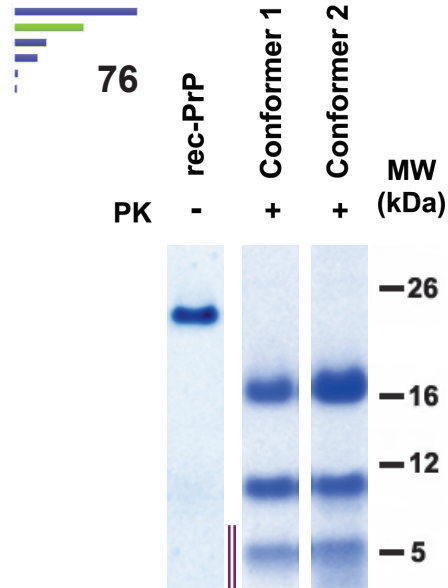

213 AA

**2**  
Conformers

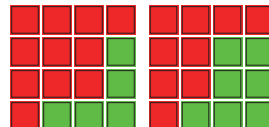

$T_m^{Exp}$ : ND  
 $\Delta\Delta G$ : -8.24

### *In vitro* studies

TgVole (1x) Not tested  
Black-backed jackal Not tested

### *In vivo* studies

TgVole (1x) Not tested  
Black-backed jackal Not tested

pLDDT  
[85.08]

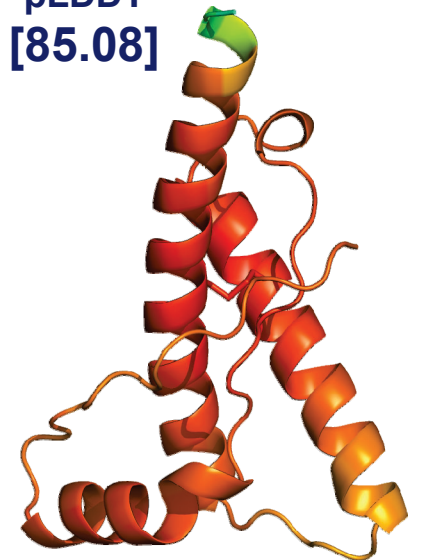

# Caracal

GenBank: **BK063932**

P29%

0



0

## Caracal caracal

Carnivora 36/41

Felidae 7/9

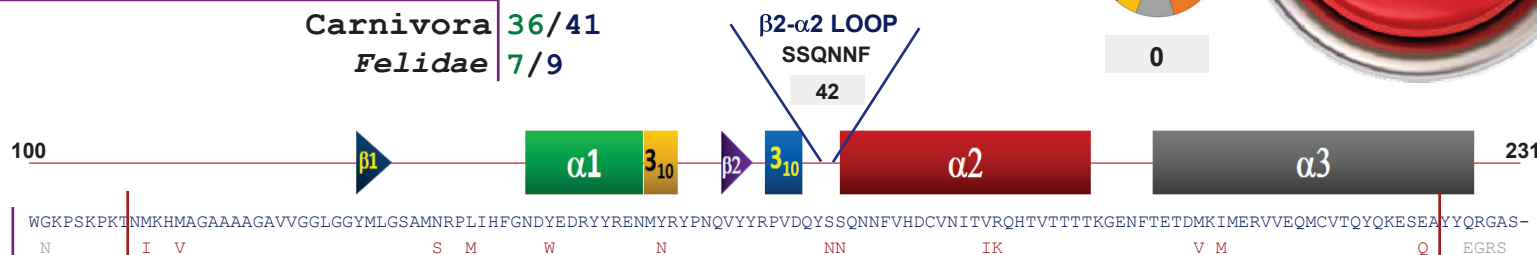

PrP sequence differs by 13 amino acids from the bank vole PrP (see in red)

- No deletions
- No insertions
- No polymorphic variants found

Tm<sup>Exp</sup>: ND

ΔΔG: -6.41

Distinct primary sequence across species

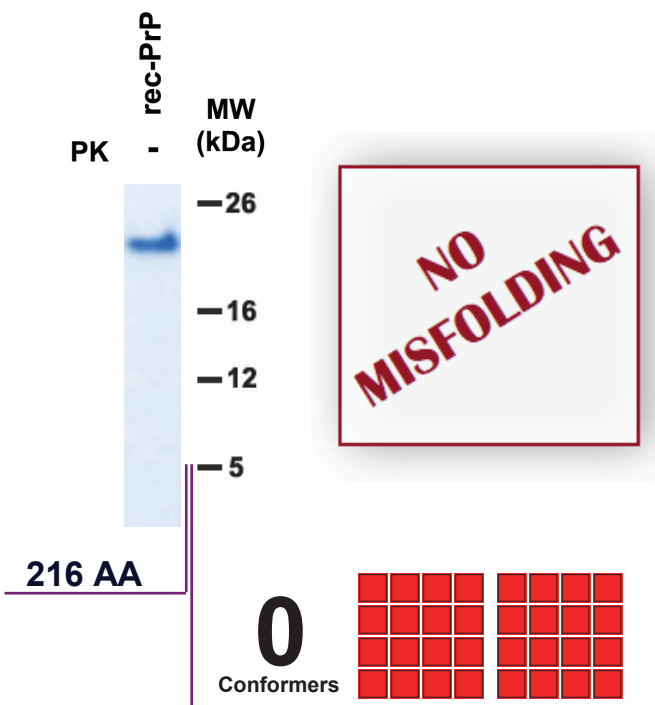

In vitro studies

NOT APPLICABLE

In vivo studies

NOT APPLICABLE

pLDDT [85.46]

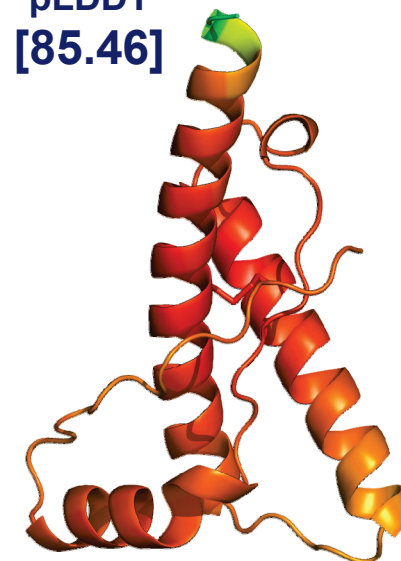

# Asian golden cat

GenBank: JX218947

P76%

64.3



60-70

## *Catopuma temminckii*

Carnivora 36/41  
Felidae 7/9

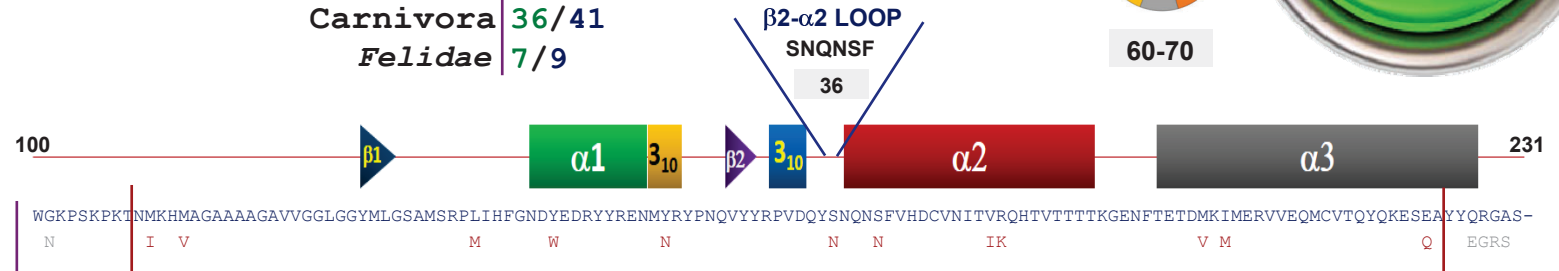

PrP sequence differs by 12 amino acids from the bank vole PrP (see in red)

No deletions  
No insertions  
No polymorphic variants found

Distinct primary sequence across species

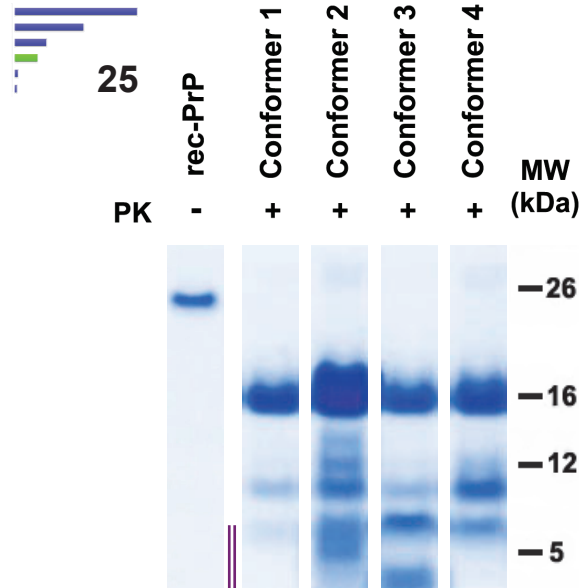

216 AA

4  
Conformers

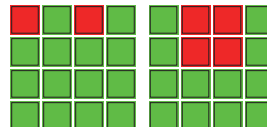

Tm<sup>Exp</sup>: ND

ΔΔG: -12.45

### *In vitro* studies

TgVole (1x) Not tested

Asian golden cat Not tested

### *In vivo* studies

TgVole (1x) Not tested

Asian golden cat Not tested

pLDDT [86.82]

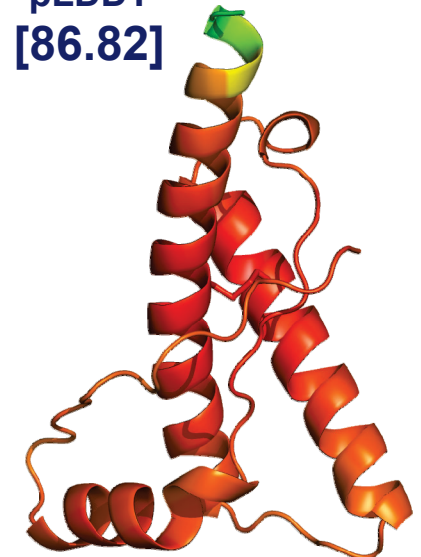

# Spotted hyena

GenBank: JX218985

P29%



0

## Crocuta crocuta

Carnivora 36/41  
Hyaenidae 1/2

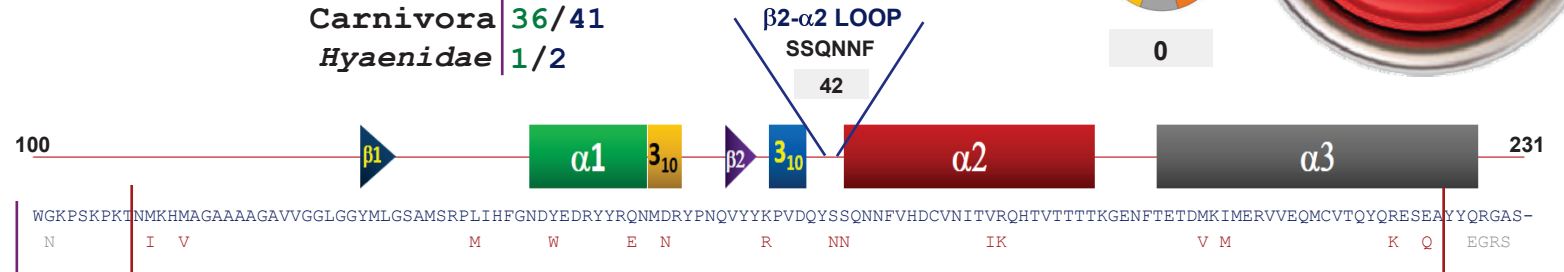

PrP sequence differs by 15 amino acids from the bank vole PrP (see in red)

- No deletions
- No insertions
- No polymorphic variants found

Tm<sup>Exp</sup>: ND

ΔΔG: -9.33

1 species sharing the same primary sequence

Striped hyena  
*Hyaena hyaena*

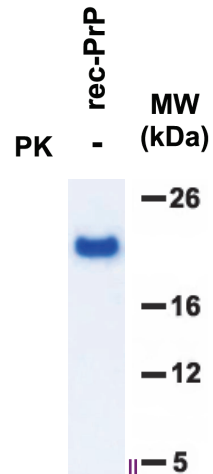

213 AA

0  
Conformers

NO  
MISFOLDING

In vitro studies

NOT  
APPLICABLE

In vivo studies

NOT  
APPLICABLE

pLDDT  
[85.27]

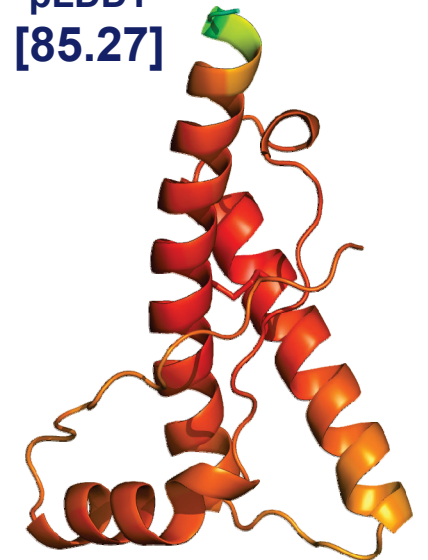



Distinct primary sequence across species

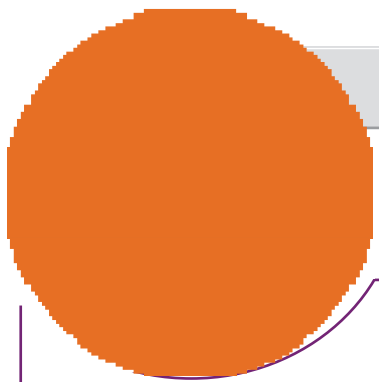

# Fossa

GenBank: **BK063948**

P45%

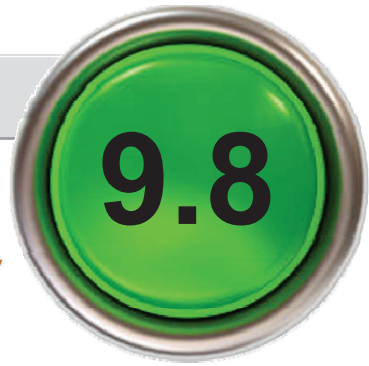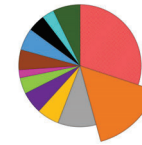

0-10

## *Cryptoprocta ferox*

Carnivora 36/41  
Eupleridae 1/1

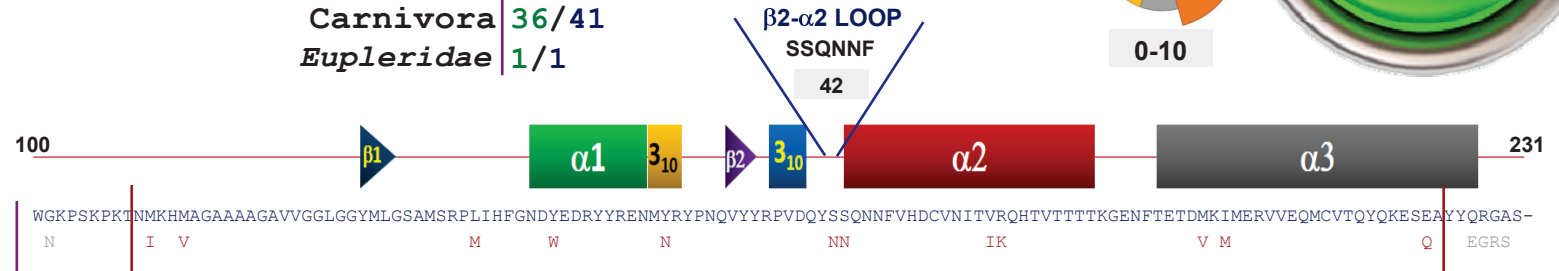

PrP sequence differs by 12 amino acids from the bank vole PrP (see in red)

- No deletions
- No insertions
- No polymorphic variants found

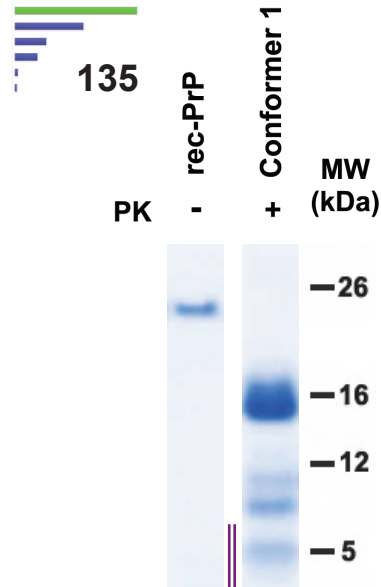

213 AA

**1**  
Conformers

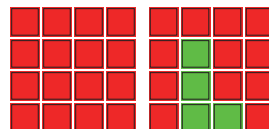

Tm<sup>Exp</sup>: ND  
ΔΔG: -8.09

### *In vitro* studies

|             |            |
|-------------|------------|
| TgVole (1x) | Not tested |
| Fossa       | Not tested |

### *In vivo* studies

|             |            |
|-------------|------------|
| TgVole (1x) | Not tested |
| Fossa       | Not tested |

pLDDT [85.56]

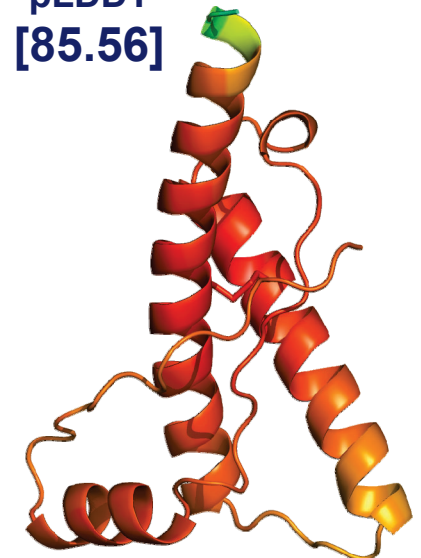

# Bearded seal

GenBank: **BK064769**

## *Erignathus barbatus*

Carnivora **36/41**  
Phocidae **4/6**

P29%

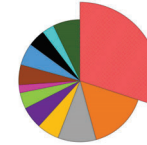

0

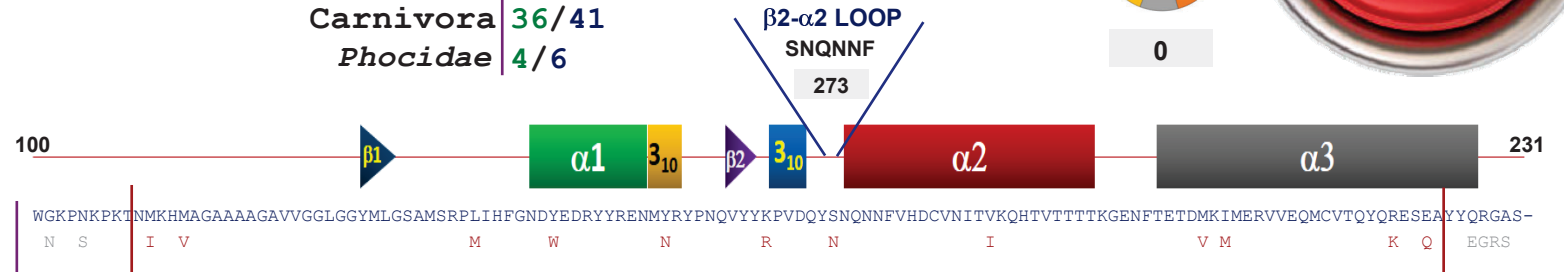

PrP sequence differs by 12 amino acids from the bank vole PrP (see in red)

No deletions  
No insertions  
No polymorphic variants found

Tm<sup>Exp</sup>: ND

ΔΔG: **-8.49**

Distinct primary sequence across species

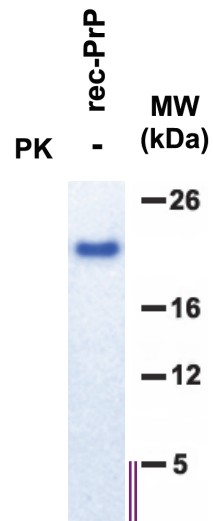

213 AA

**0**  
Conformers

**NO MISFOLDING**

*In vitro* studies

**NOT APPLICABLE**

*In vivo* studies

**NOT APPLICABLE**

pLDDT [85.87]

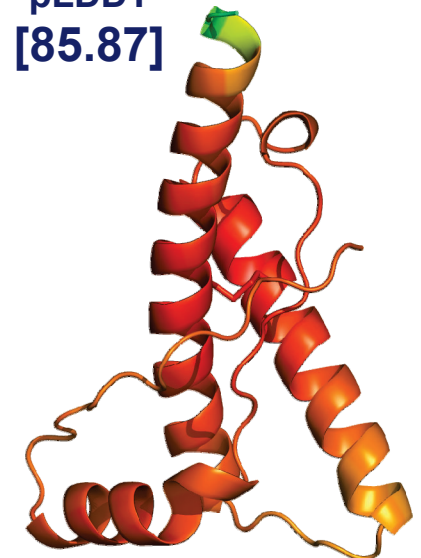

3 species sharing the same primary sequence

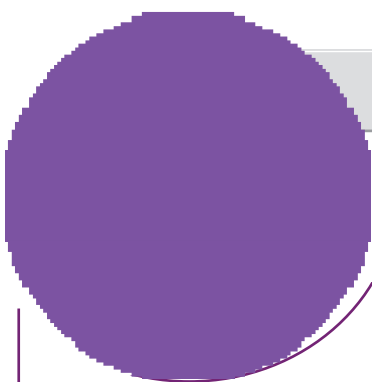

- Jungle cat *Felis chaus*
- Black-footed cat *Felis nigripes*
- Pallas's cat *Otocolobus manul*

# Cat

GenBank: EU588730

## *Felis silvestris catus*

Carnivora 36/41  
Felidae 7/9

P49%

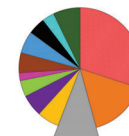

10-20

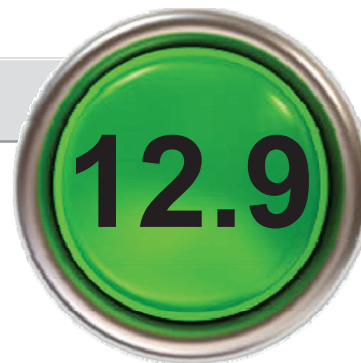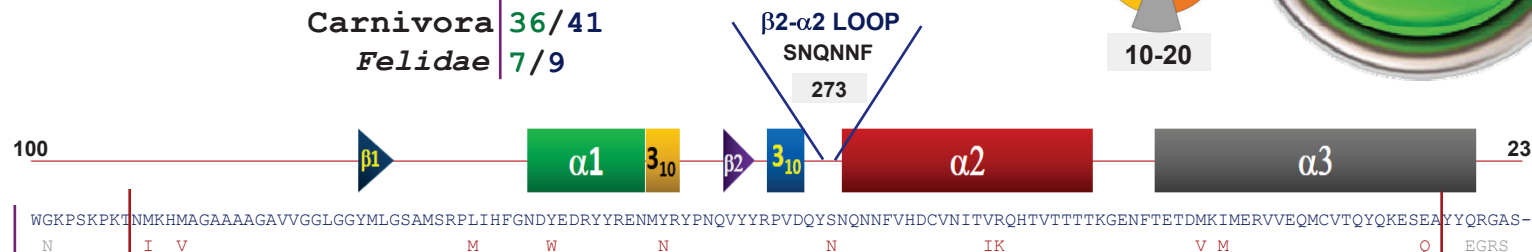

PrP sequence differs by 11 amino acids from the bank vole PrP (see in red)

- No deletions
- No insertions
- No polymorphic variants found

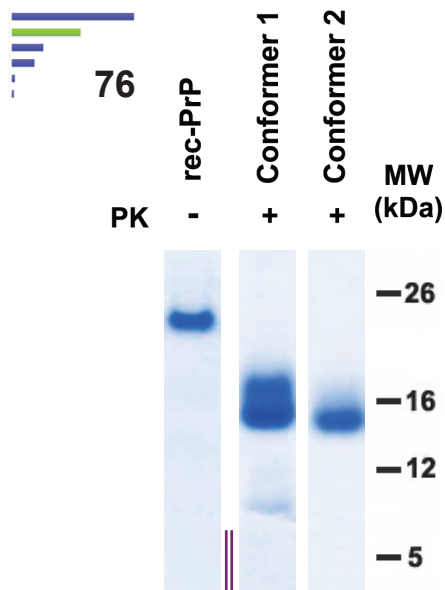

216 AA

2 Conformers

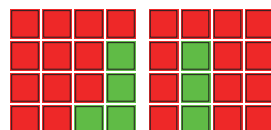

Tm<sup>Exp</sup>: ND

ΔΔG: -8.92

### In vitro studies

- TgVole (1x) **Propagate**
- Cat **Ongoing**

### In vivo studies

- TgVole (1x) **Ongoing**
- Cat **Not tested**

pLDDT [85.65]

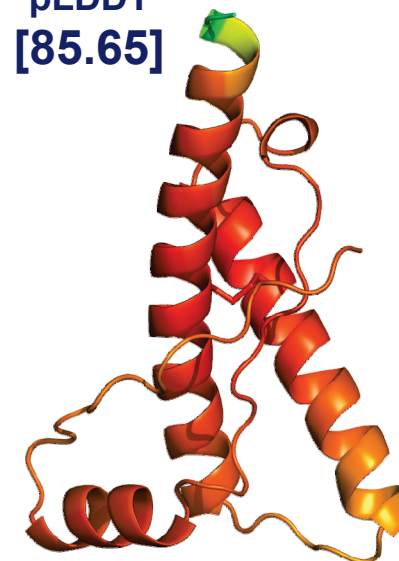

# Wolverine

GenBank: EU341500

P61%

29.8

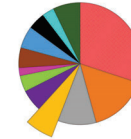

20-30

6 species sharing the same primary sequence

- Tayra *Eira barbara*
- Yellow-throated marten *Martes flavigula*
- Beech marten *Martes foina*
- European pine marten *Martes martes*
- Sable *Martes zibellina*
- American badger *Taxidea taxus jeffersonii*

## *Gulo gulo*

Carnivora 36/41  
Mustelidae 5/5

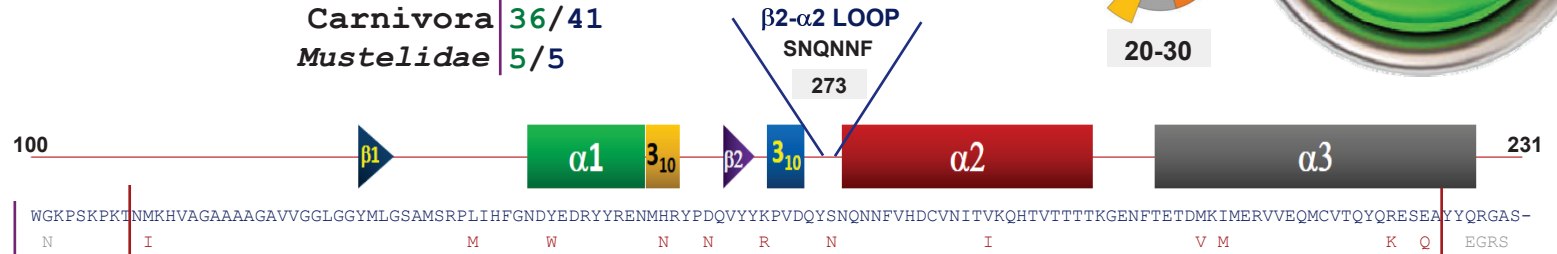

PrP sequence differs by 12 amino acids from the bank vole PrP (see in red)

No deletions  
No insertions  
No polymorphic variants found

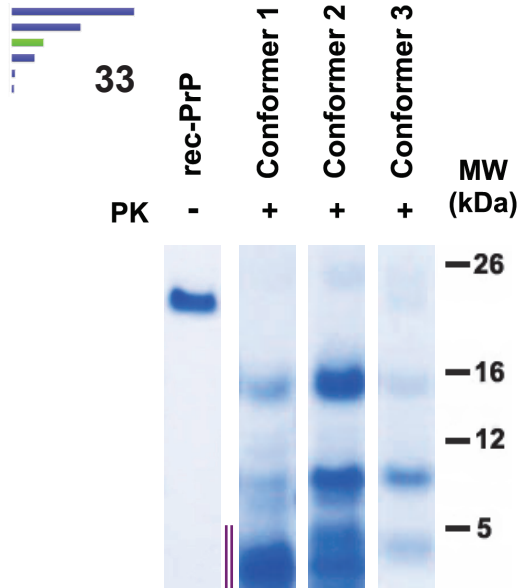

213 AA

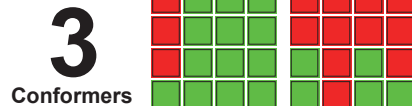

Tm<sup>Exp</sup>: ND  
ΔΔG: -4.08

### In vitro studies

TgVole (1x) Not tested  
Wolverine Not tested

### In vivo studies

TgVole (1x) Not tested  
Wolverine Not tested

pLDDT [85.02]

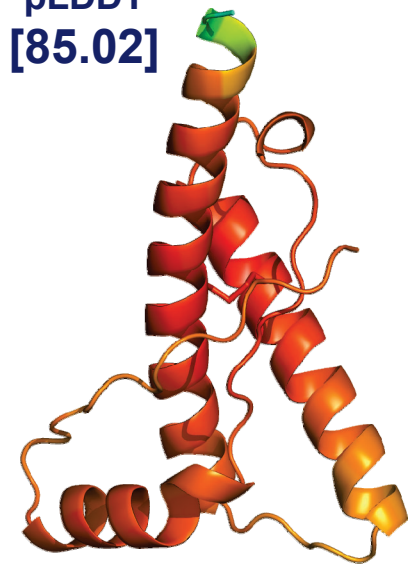

Distinct primary sequence across species

# Common dwarf mongoose

GenBank: **BK064051**

P34%

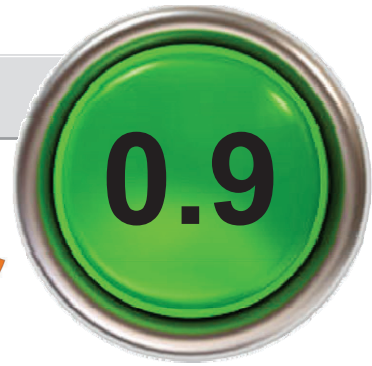

0-10

## Helogale parvula

Carnivora 36/41

Herpestidae 4/4

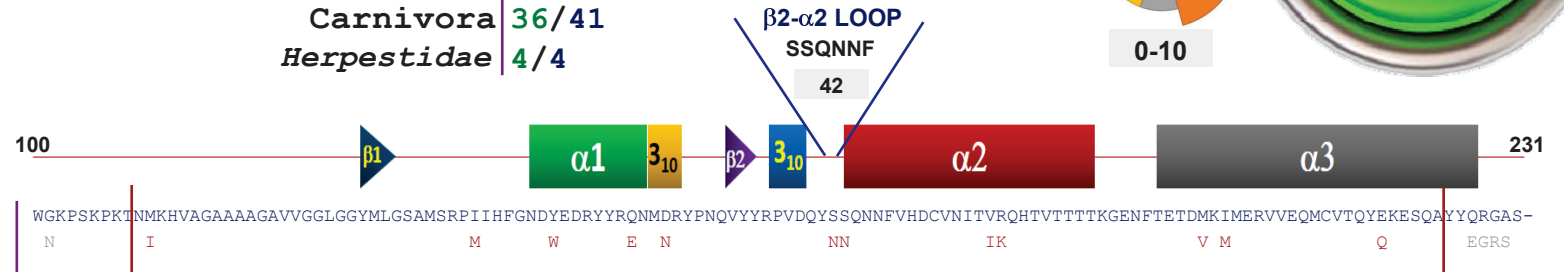

PrP sequence differs by 12 amino acids from the bank vole PrP (see in red)

- No deletions
- No insertions
- No polymorphic variants found

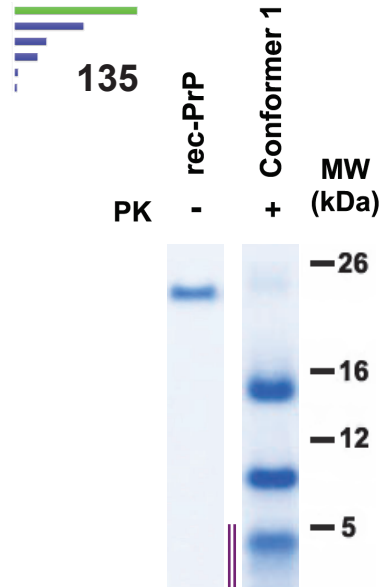

217 AA

1 Conformers

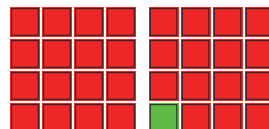

Tm<sup>Exp</sup>: ND

ΔΔG: -11.52

### In vitro studies

TgVole (1x) Not tested

Common dwarf mongoose Not tested

### In vivo studies

TgVole (1x) Not tested

Common dwarf mongoose Not tested

pLDDT [84.99]

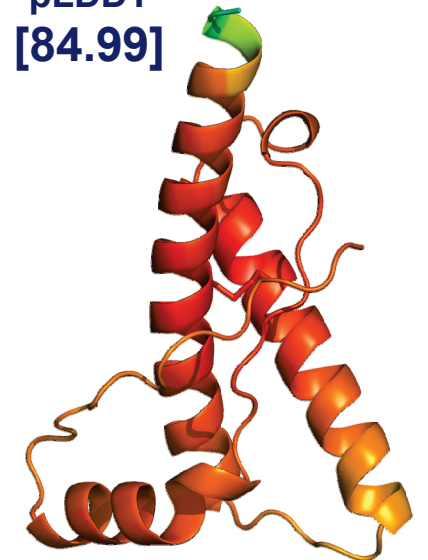

# Javan mongoose

GenBank: EU341501

P66%

39.6

## *Herpestes javanicus*

Carnivora 36/41  
Herpestidae 4/4



30-40

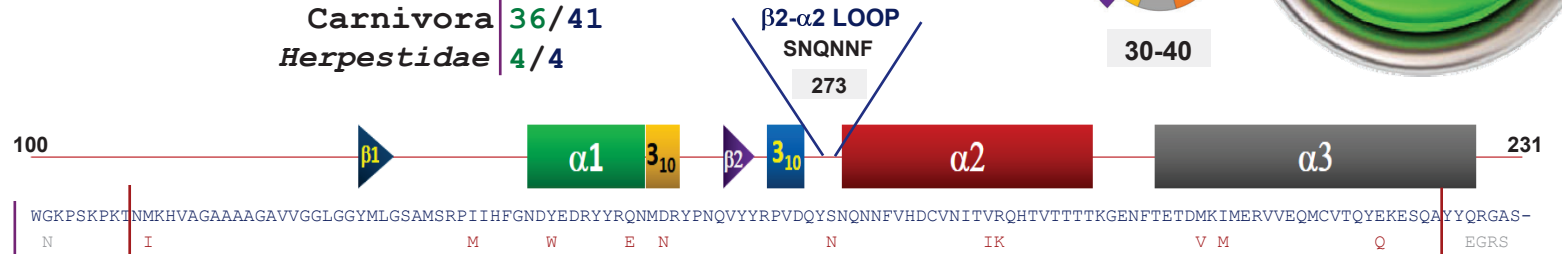

PrP sequence differs by 11 amino acids from the bank vole PrP (see in red)

No deletions  
No insertions  
No polymorphic variants found

Distinct primary sequence across species

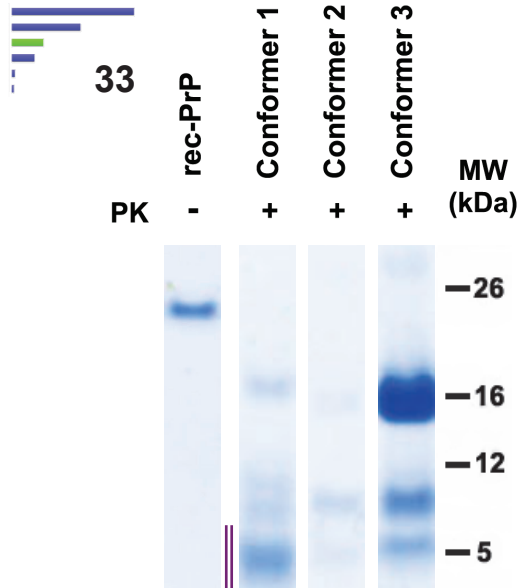

217 AA

3  
Conformers

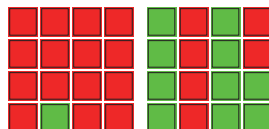

Tm<sup>Exp</sup>: ND

ΔΔG: -6.95

### *In vitro* studies

TgVole (1x) Not tested  
Javan mongoose Not tested

### *In vivo* studies

TgVole (1x) Not tested  
Javan mongoose Not tested

pLDDT [85.35]

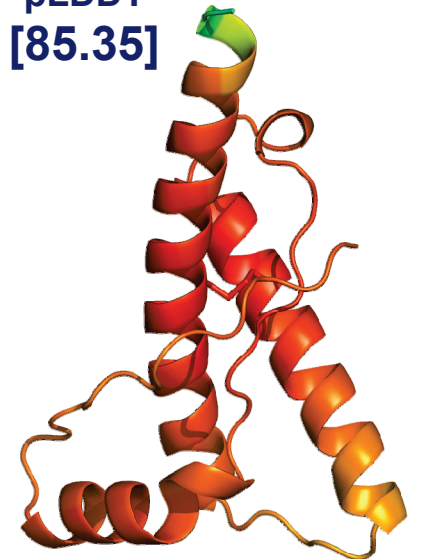

# Geoffroy's cat

GenBank: **BK064182**

**P39%**

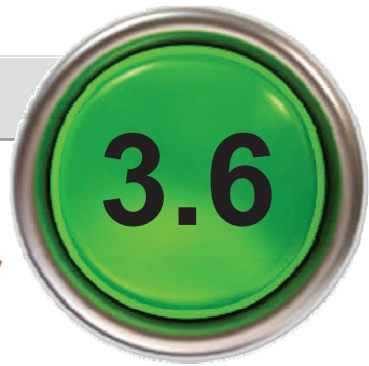

0-10

## Leopardus geoffroyi

Carnivora **36/41**  
Felidae **7/9**

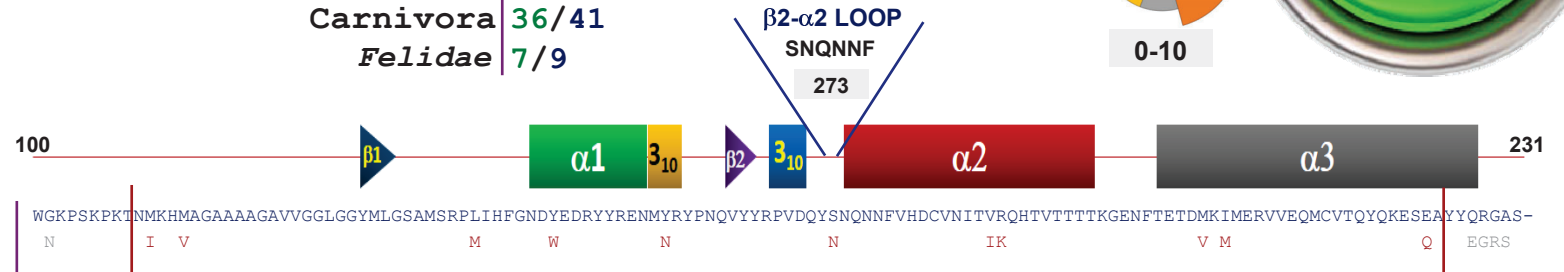

PrP sequence differs by 11 amino acids from the bank vole PrP (see in red)

No deletions  
No insertions  
No polymorphic variants found

Distinct primary sequence across species

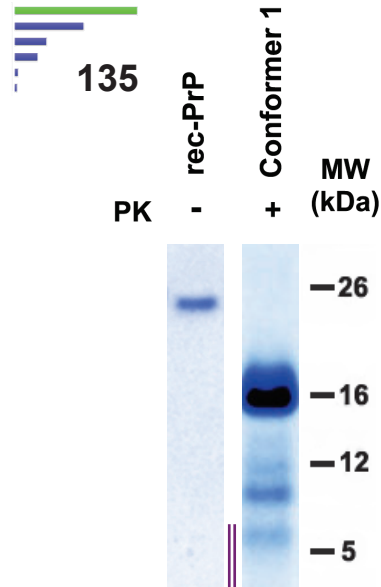

216 AA

**1**  
Conformers

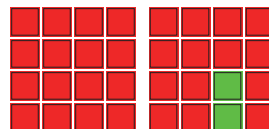

$T_m^{Exp}$ : ND

$\Delta\Delta G$ : -7.1

### *In vitro* studies

TgVole (1x) Not tested

Geoffroy's cat Not tested

### *In vivo* studies

TgVole (1x) Not tested

Geoffroy's cat Not tested

pLDDT  
[85.81]

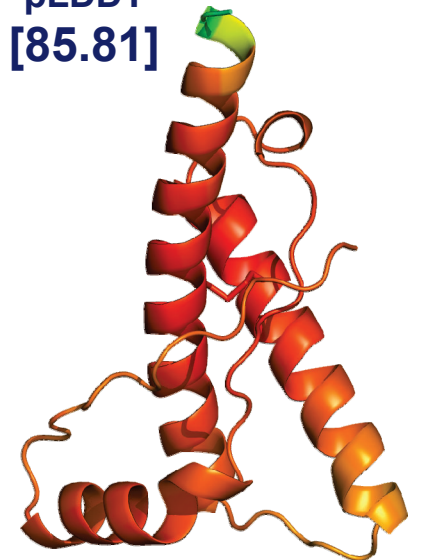

# Oncilla

GenBank: **BK064829**

P29%

0

## Leopardus tigrinus

Carnivora 36/41

Felidae 7/9

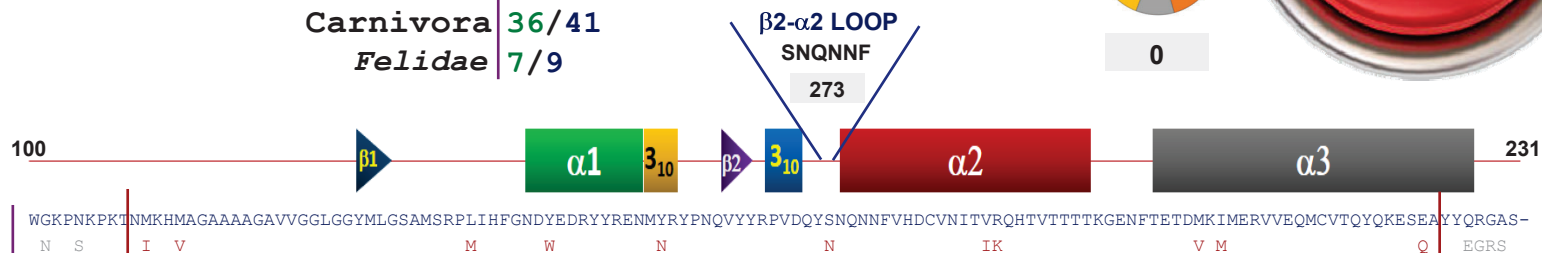

PrP sequence differs by 11 amino acids from the bank vole PrP (see in red)

No deletions  
No insertions  
No polymorphic variants found

$T_m^{Exp}$ : ND

$\Delta\Delta G$ : -14.52

Distinct primary sequence across species

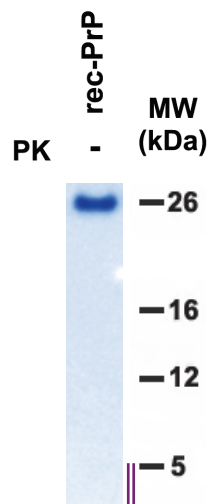

NO MISFOLDING

0 Conformers

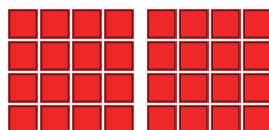

*In vitro* studies

NOT APPLICABLE

*In vivo* studies

NOT APPLICABLE

pLDDT [93.41]

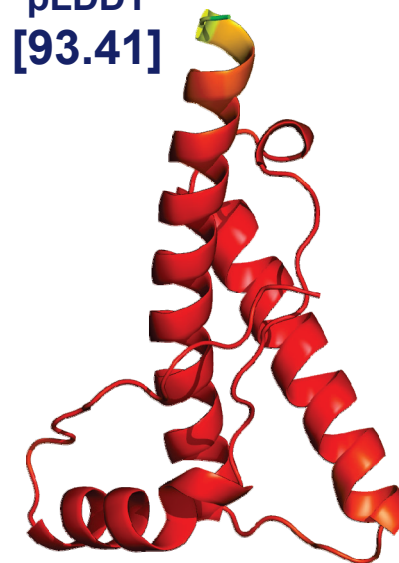



# Margay

GenBank: JX218979

P34%



0-10

## Leopardus wiedii

Carnivora 36/41  
Felidae 7/9

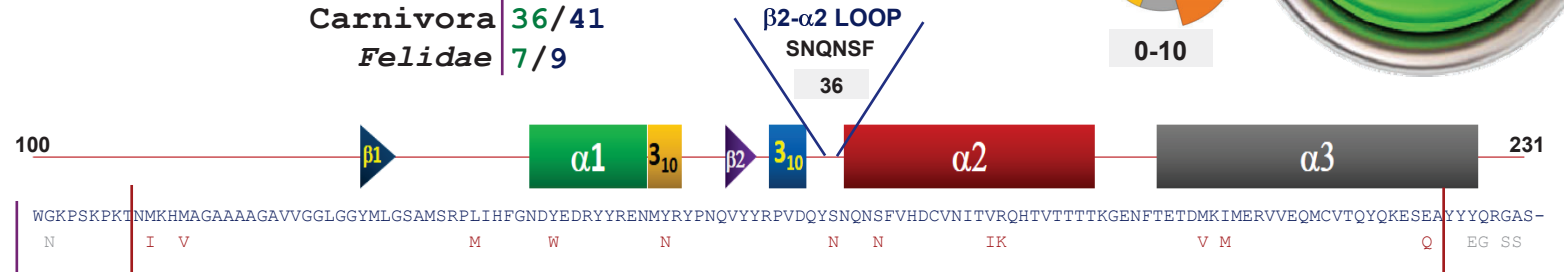

PrP sequence differs by 12 amino acids from the bank vole PrP (see in red)

- No deletions
- No insertions
- No polymorphic variants found

Distinct primary sequence across species

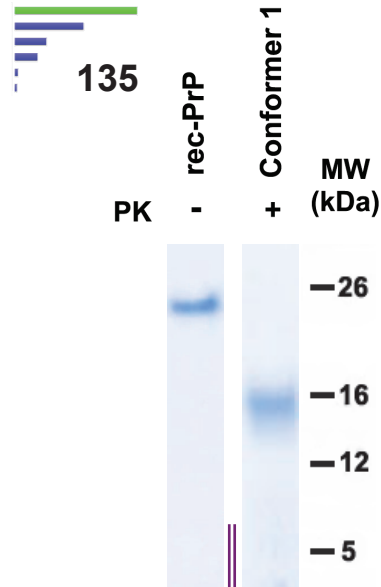

217 AA

1  
Conformers

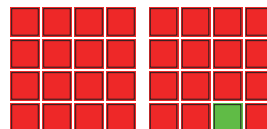

Tm<sup>Exp</sup>: ND  
ΔΔG: ND

### In vitro studies

|             |            |
|-------------|------------|
| TgVole (1x) | Not tested |
| Margay      | Not tested |

### In vivo studies

|             |            |
|-------------|------------|
| TgVole (1x) | Not tested |
| Margay      | Not tested |

pLDDT  
[85.39]

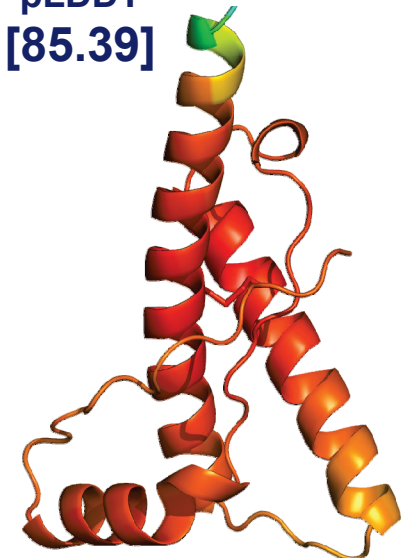

Distinct primary sequence across species

# Weddell seal

GenBank: XM\_006744312

P76%

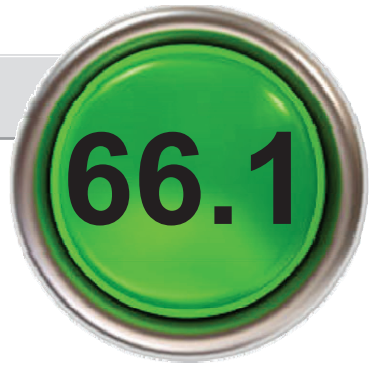

60-70

## Leptonychotes weddellii

Carnivora 36/41  
Phocidae 4/6

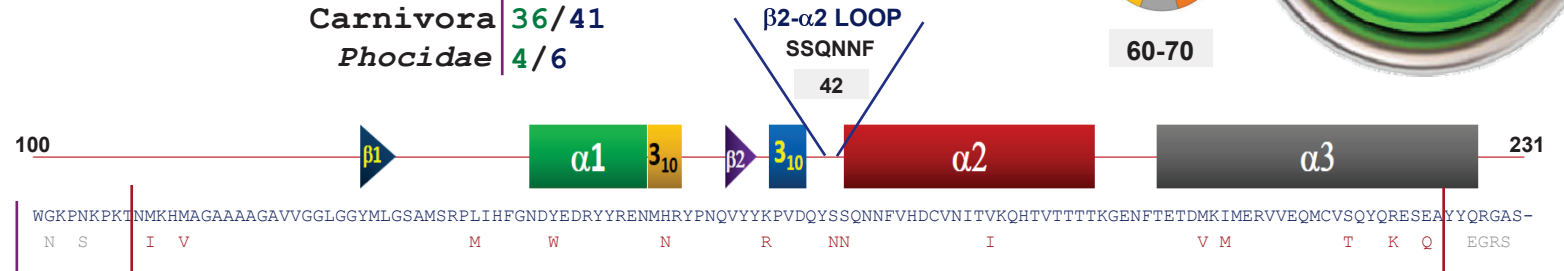

PrP sequence differs by 14 amino acids from the bank vole PrP (see in red)

- No deletions
- No insertions
- No polymorphic variants found

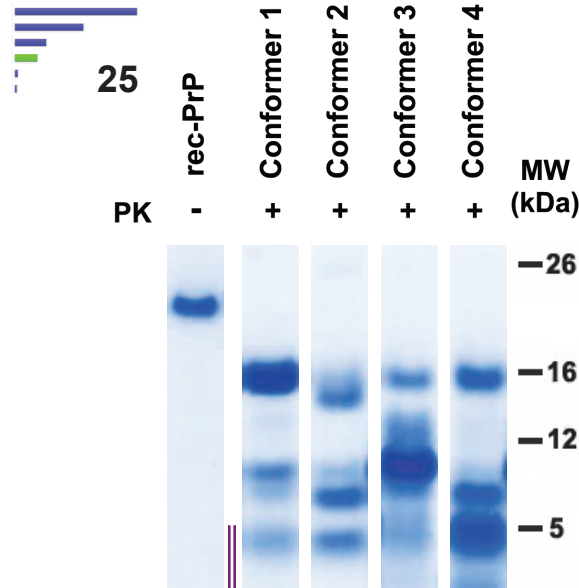

213 AA

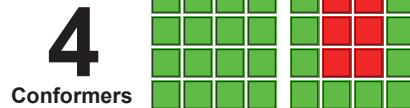

Tm<sup>Exp</sup>: ND  
ΔΔG: -6.26

### In vitro studies

TgVole (1x) Not tested  
Weddell seal Not tested

### In vivo studies

TgVole (1x) Not tested  
Weddell seal Not tested

pLDDT [85.17]

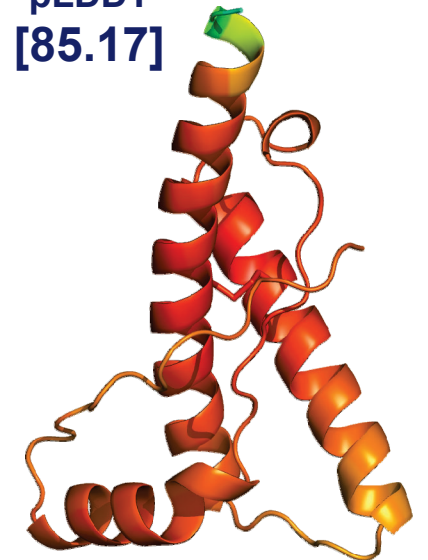

# African wild dog

GenBank: **BK064019**

P100%

100

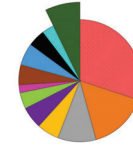

100

## *Lycaon pictus*

Carnivora 36/41  
Canidae 5/5

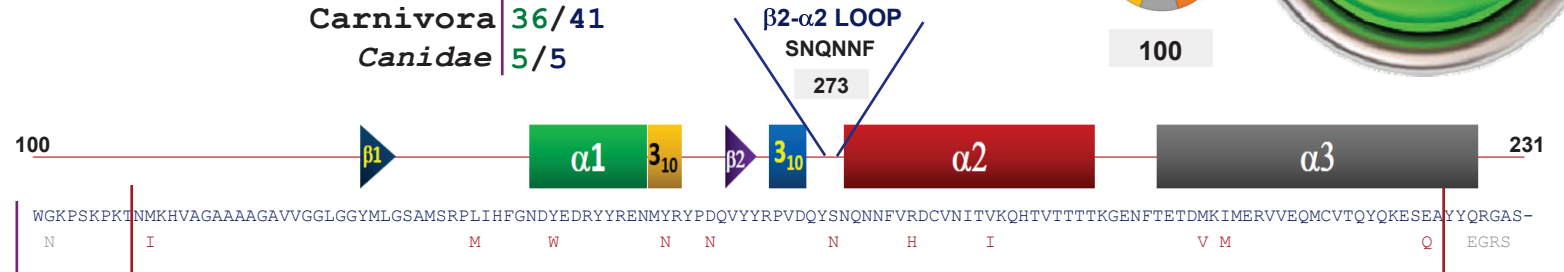

PrP sequence differs by 11 amino acids from the bank vole PrP (see in red)

- No deletions
- No insertions
- No polymorphic variants found

Distinct primary sequence across species

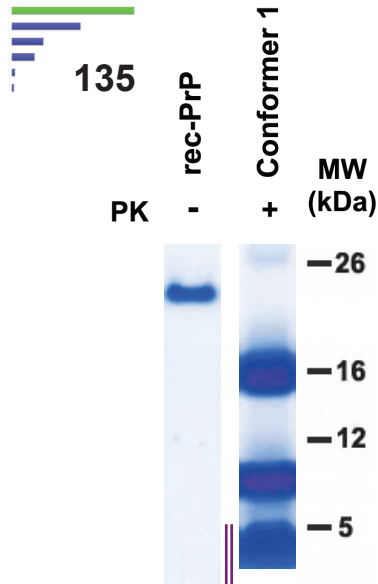

213 AA

1  
Conformers



Tm<sup>Exp</sup>: ND

ΔΔG: -6.06

### *In vitro* studies

- TgVole (1x) Not tested
- African wild dog Not tested

### *In vivo* studies

- TgVole (1x) Not tested
- African wild dog Not tested

pLDDT [85.29]

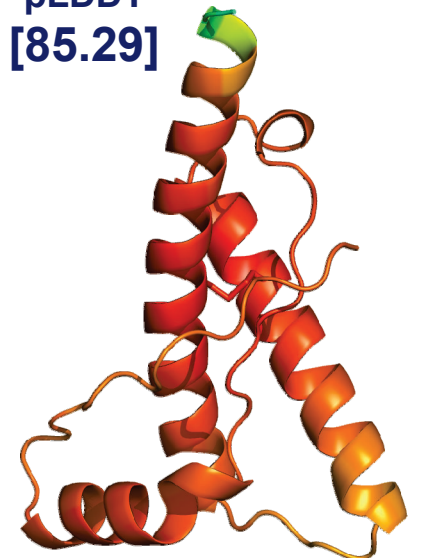

# Iberian lynx

GenBank: **BK064941**

P31%

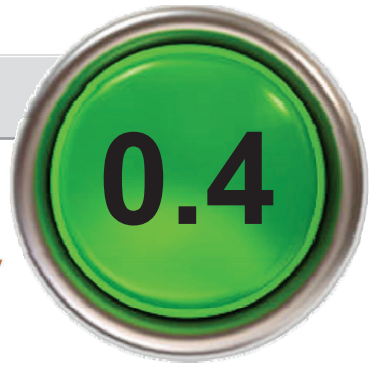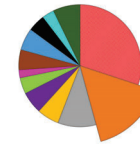

0-10

## *Lynx pardinus*

Carnivora 36/41  
Felidae 7/9



PrP sequence differs by 11 amino acids from the bank vole PrP (see in red)

No deletions  
No insertions  
No polymorphic variants found

8 species sharing the same primary sequence

- Cheetah *Acinonyx jubatus*
- Canada lynx *Lynx canadensis*
- Eurasian lynx *Lynx lynx*
- Leopard cat *Prionailurus bengalensis euptilurus*
- Iriomote cat *Prionailurus iriomotensis*
- Fishing cat *Prionailurus viverrinus*
- Cougar *Puma concolor*
- Jaguarundi *Puma yagouarundi*

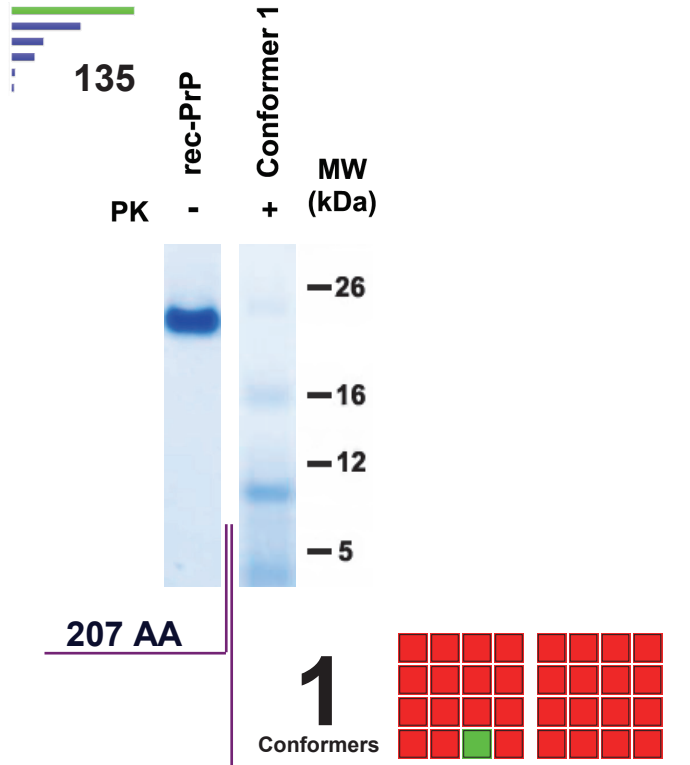

$T_m^{Exp}$ : ND  
 $\Delta\Delta G$ : -8.12

### In vitro studies

TgVole (1x) Not tested  
Iberian lynx Not tested

### In vivo studies

TgVole (1x) Not tested  
Iberian lynx Not tested

pLDDT [85.48]

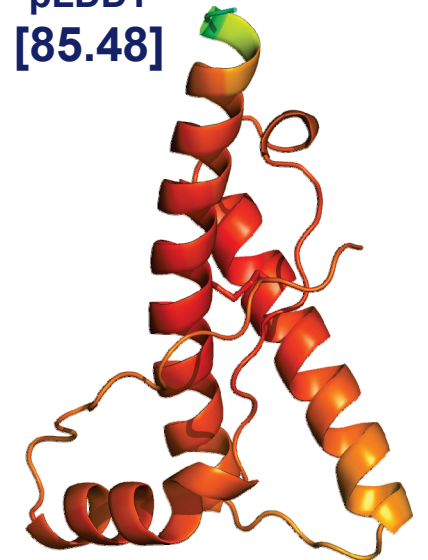

Distinct primary sequence across species

# Bobcat

GenBank: EU341503

P87%

83.9



80-90

## Lynx rufus

Carnivora 36/41  
Felidae 7/9

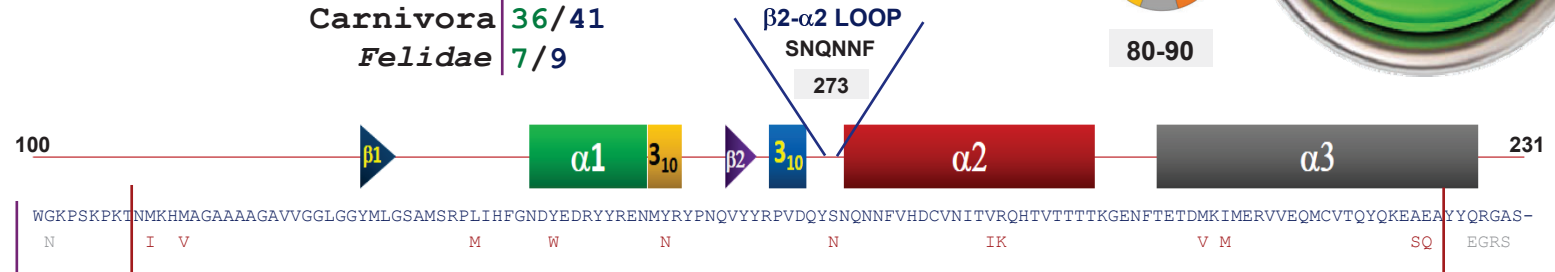

PrP sequence differs by 12 amino acids from the bank vole PrP (see in red)

- No deletions
- No insertions
- No polymorphic variants found

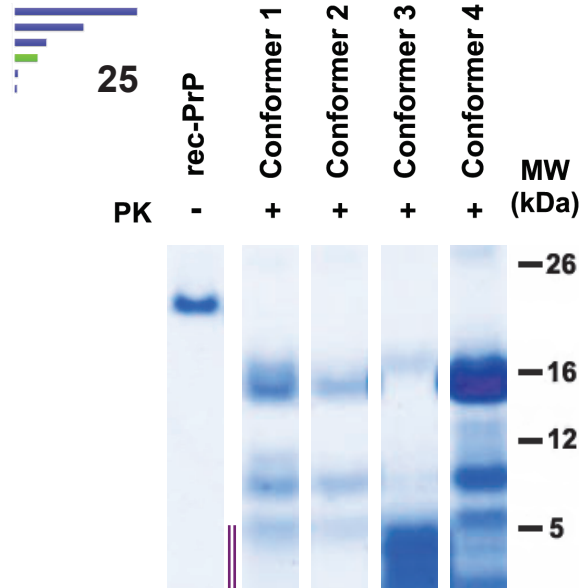

216 AA

4  
Conformers

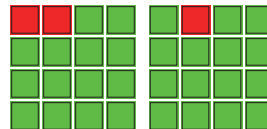

Tm<sup>Exp</sup>: ND

ΔΔG: -6.74

### In vitro studies

|             |            |
|-------------|------------|
| TgVole (1x) | Not tested |
| Bobcat      | Not tested |

### In vivo studies

|             |            |
|-------------|------------|
| TgVole (1x) | Not tested |
| Bobcat      | Not tested |

pLDDT  
[85.81]

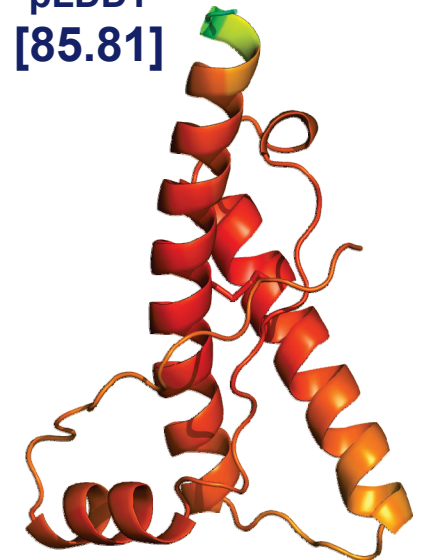

# Honey badger

GenBank: **BK064009**

P100%

100



100

## *Mellivora capensis*

Carnivora 36/41  
Mustelidae 5/5

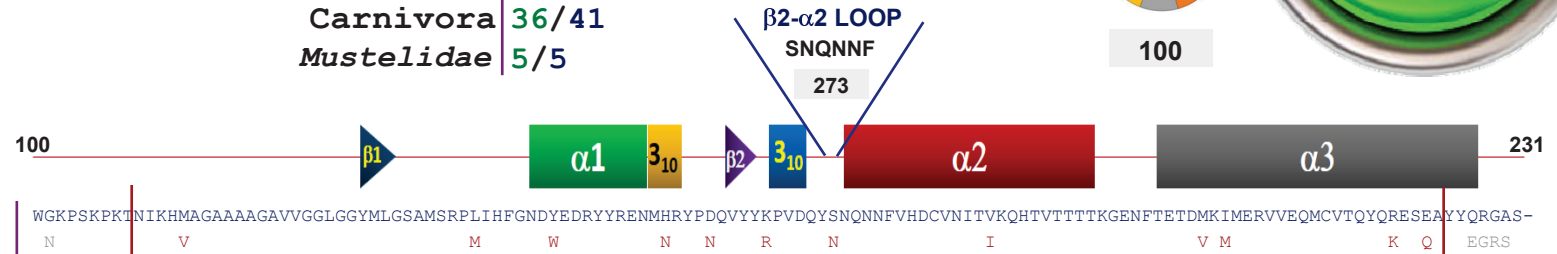

PrP sequence differs by 12 amino acids from the bank vole PrP (see in red)

No deletions  
No insertions  
No polymorphic variants found

Distinct primary sequence across species

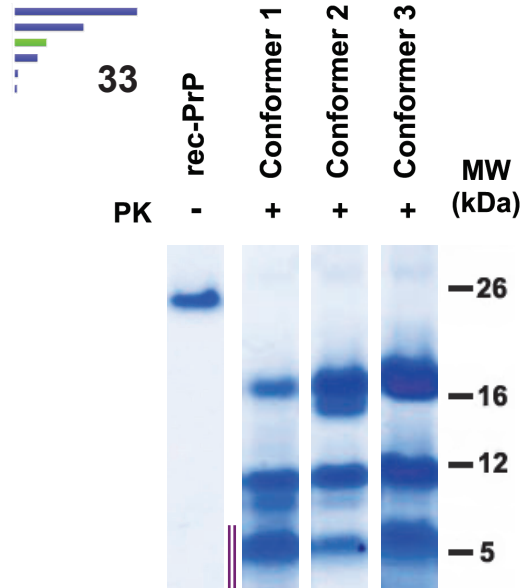

213 AA

3  
Conformers

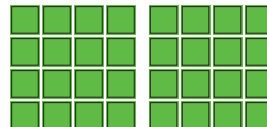

Tm<sup>Exp</sup>: ND

ΔΔG: -6.43

### *In vitro* studies

TgVole (1x) Not tested  
Honey badger Not tested

### *In vivo* studies

TgVole (1x) Not tested  
Honey badger Not tested

pLDDT  
[85.68]

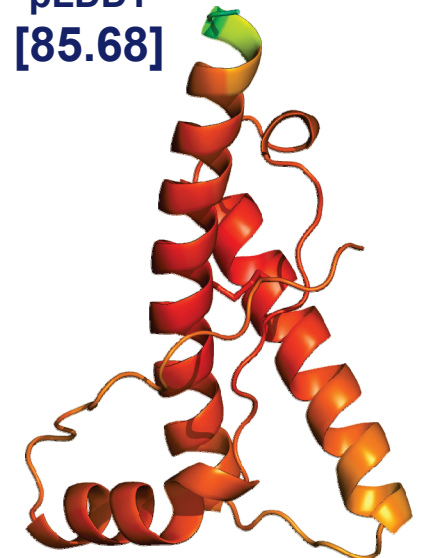

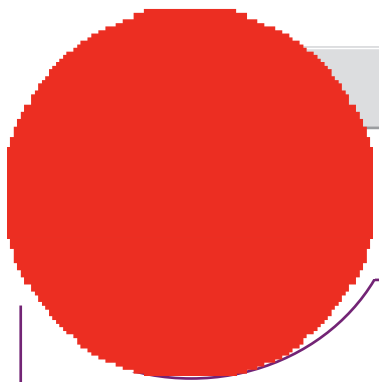

# Skunk

GenBank: EU341504

P45%

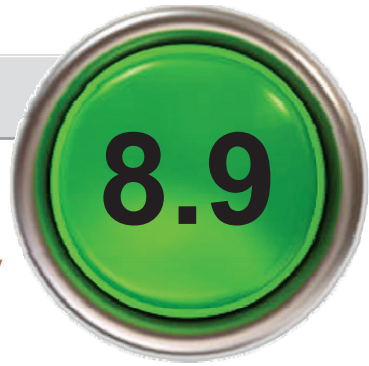

0-10

## *Mephitis mephitis*

Carnivora 36/41  
Mephitidae 2/2

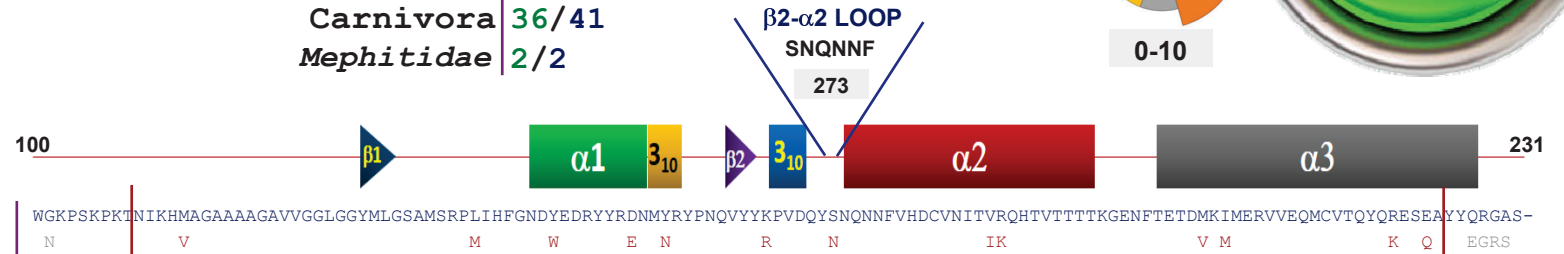

PrP sequence differs by 13 amino acids from the bank vole PrP (see in red)

- No deletions
- No insertions
- No polymorphic variants found

Distinct primary sequence across species

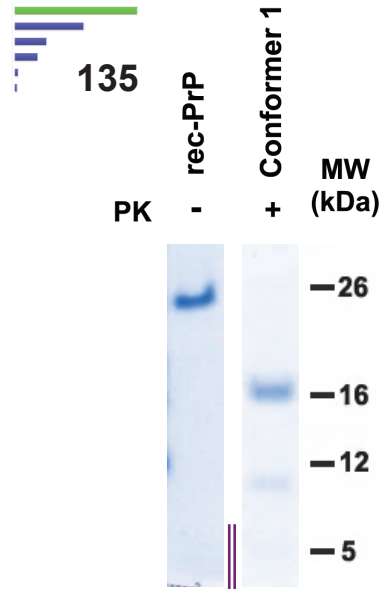

213 AA

1 Conformers

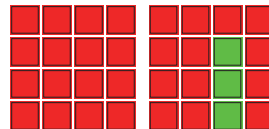

Tm<sup>Exp</sup>: ND  
ΔΔG: -4.03

### *In vitro* studies

- TgVole (1x) Ongoing
- Skunk Ongoing

### *In vivo* studies

- TgVole (1x) Ongoing
- Skunk Not tested

pLDDT [85.04]

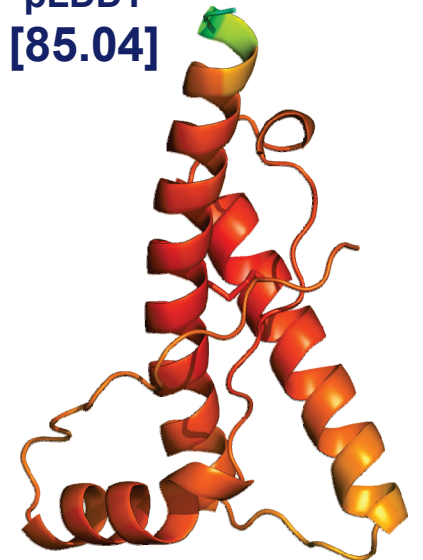

1 species sharing the same primary sequence

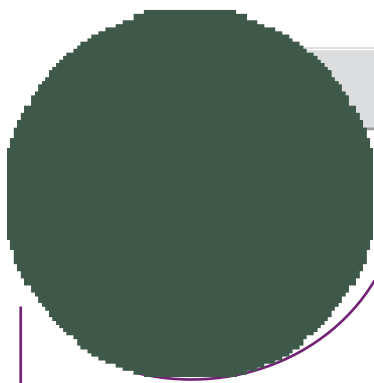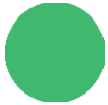

Northern elephant seal  
*Mirounga angustirostris*

# Southern elephant seal

GenBank: XM\_035005902

P75%

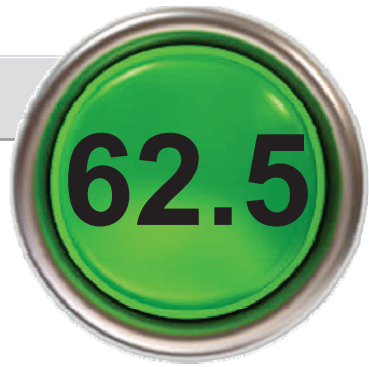

60-70

## *Mirounga leonina*

Carnivora 36/41  
Phocidae 4/6

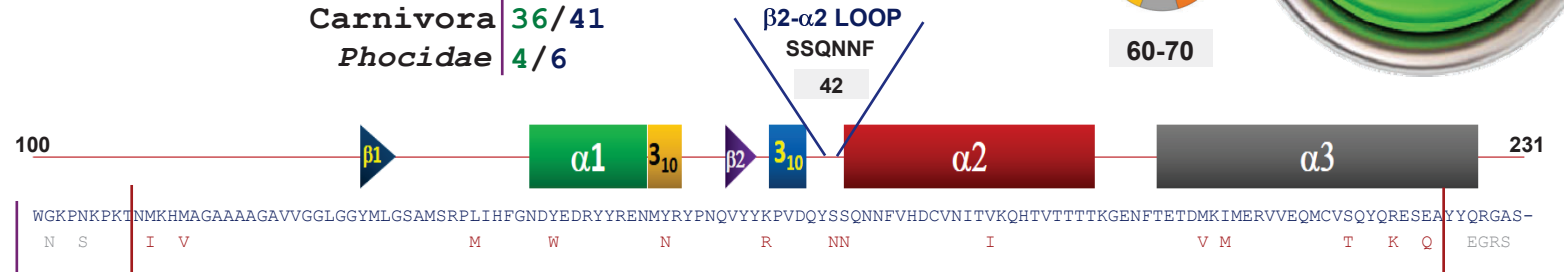

PrP sequence differs by 14 amino acids from the bank vole PrP (see in red)

No deletions  
No insertions  
No polymorphic variants found

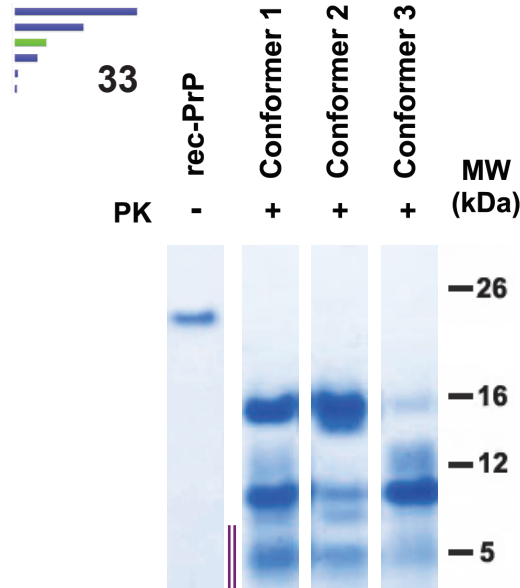

213 AA

3  
Conformers

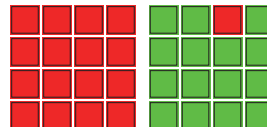

Tm<sup>Exp</sup>: ND

ΔΔG: -12.06

### In vitro studies

TgVole (1x) Not tested  
Southern elephant seal Not tested

### In vivo studies

TgVole (1x) Not tested  
Southern elephant seal Not tested

pLDDT  
[85.82]

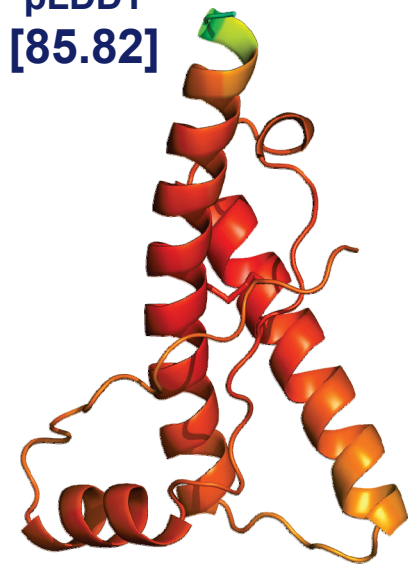



# Hawaiian monk seal

GenBank: XM\_021689157

*Monachus schauinslandi*

Carnivora 36/41  
Phocidae 4/6

P58%

24.6



20-30

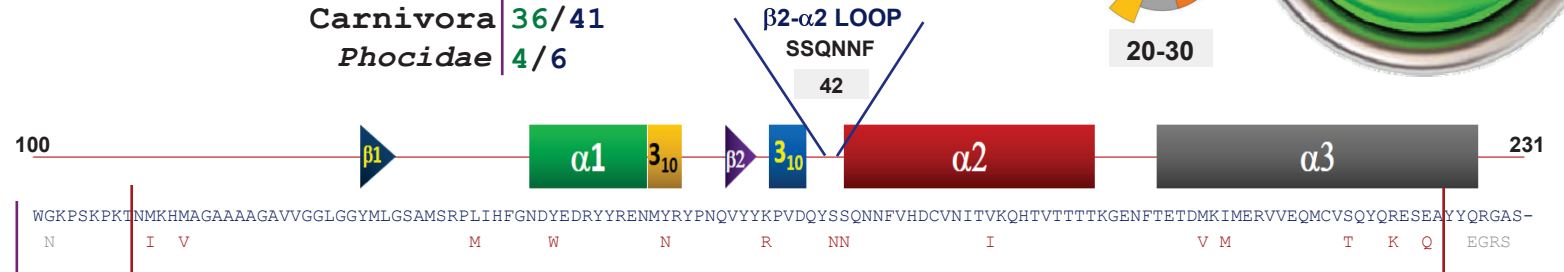

PrP sequence differs by 14 amino acids from the bank vole PrP (see in red)

No deletions  
No insertions  
No polymorphic variants found

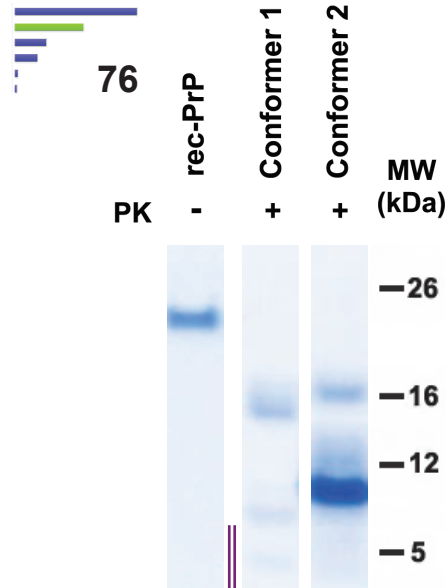

213 AA

2 Conformers

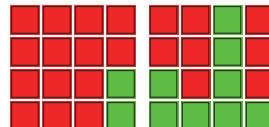

Tm<sup>Exp</sup>: ND

ΔΔG: -10.71

### In vitro studies

TgVole (1x) Not tested  
Hawaiian monk seal Not tested

### In vivo studies

TgVole (1x) Not tested  
Hawaiian monk seal Not tested

pLDDT [85.69]

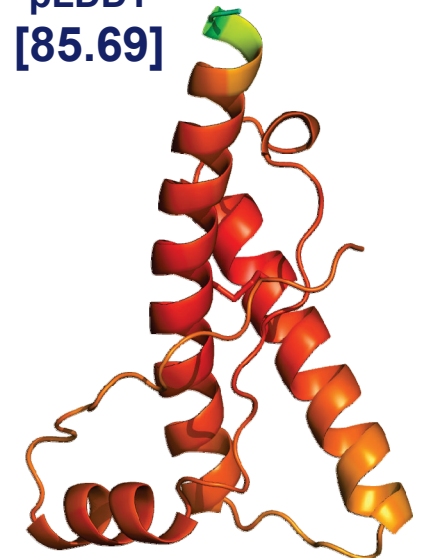

Distinct primary sequence across species

# Banded mongoose

GenBank: **BK064099**

P57%

**23.6**



20-30

## *Mungos mungo*

Carnivora **36/41**  
Herpestidae **4/4**

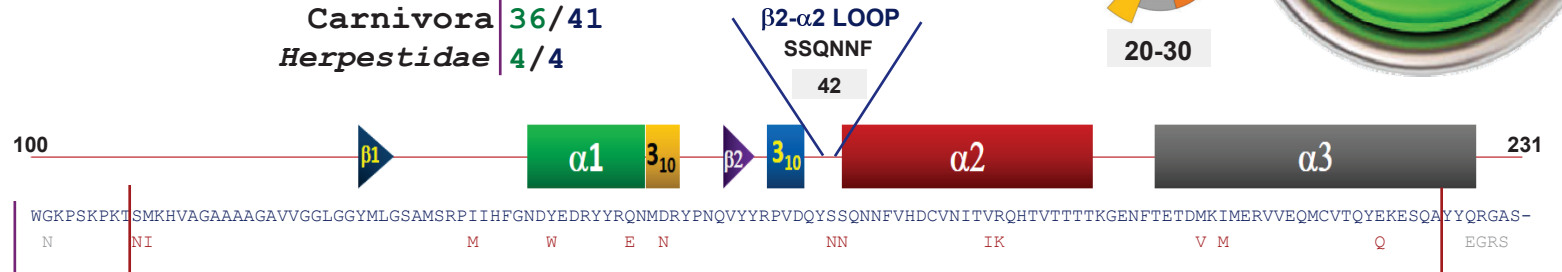

PrP sequence differs by 13 amino acids from the bank vole PrP (see in red)

- No deletions
- No insertions
- No polymorphic variants found

Distinct primary sequence across species

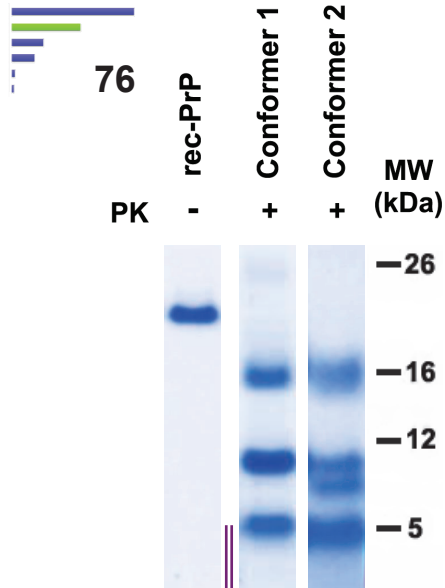

209 AA

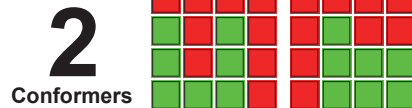

Tm<sup>Exp</sup>: ND

ΔΔG: **-9.1**

### *In vitro* studies

|                 |            |
|-----------------|------------|
| TgVole (1x)     | Not tested |
| Banded mongoose | Not tested |

### *In vivo* studies

|                 |            |
|-----------------|------------|
| TgVole (1x)     | Not tested |
| Banded mongoose | Not tested |

pLDDT  
**[84.98]**

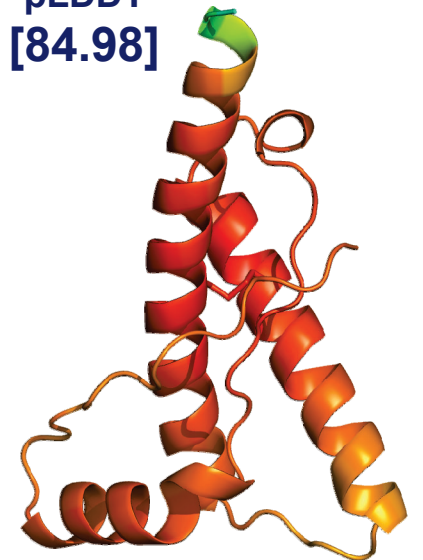

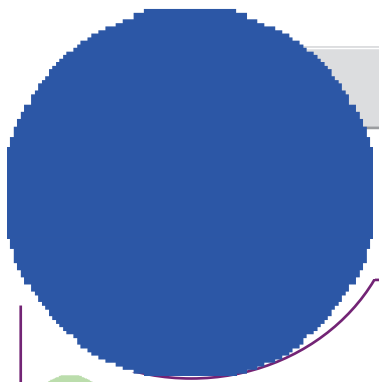

# Stoat

GenBank: EU341505

P92%

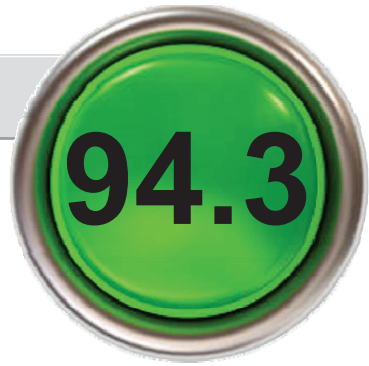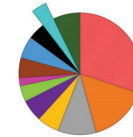

90-100

## *Mustela erminea*

Carnivora 36/41  
Mustelidae 5/5

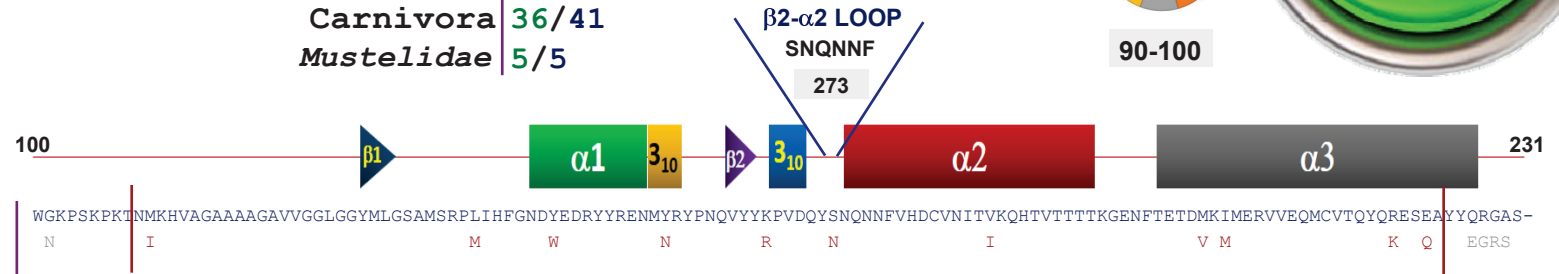

PrP sequence differs by 11 amino acids from the bank vole PrP (see in red)

- No deletions
- No insertions
- No polymorphic variants found

14 species sharing the same primary sequence

- Raccoon *Procyon lotor*
- Stoat *Mustela erminea*
- Sea otter *Enhydra lutris*
- European otter *Lutra lutra*
- North American river otter *Lontra canadensis*
- Giant otter *Pteronura brasiliensis*
- European mink *Mustela lutreola*
- Least weasel *Mustela nivalis*
- South American coati *Nasua nasua*
- Asian small-clawed otter *Aonyx cinerea*
- Ring-tailed cat *Bassariscus astutus*
- Cacomistle *Bassariscus sumichrasti*
- White-nosed coati *Nasua narica*
- Black-footed ferret *Mustela nigripes*

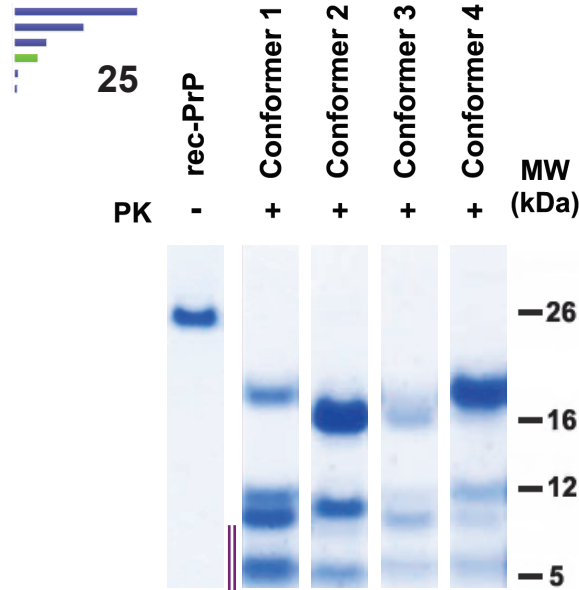

213 AA

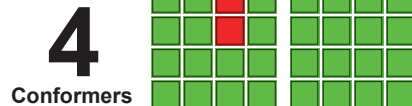

Tm<sup>Exp</sup>: ND  
ΔΔG: -8.8

### In vitro studies

|             |            |
|-------------|------------|
| TgVole (1x) | Not tested |
| Stoat       | Not tested |

### In vivo studies

|             |            |
|-------------|------------|
| TgVole (1x) | Not tested |
| Stoat       | Not tested |

pLDDT [87.3]

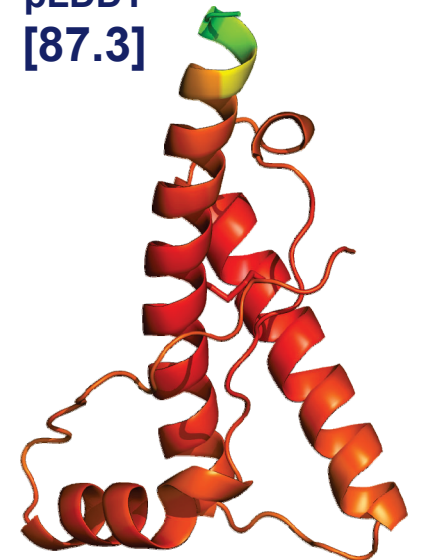

Distinct primary sequence across species

# American mink

GenBank: EF508270

P81%

71.4



70-80

## Neovison vison

Carnivora 36/41  
Mustelidae 5/5

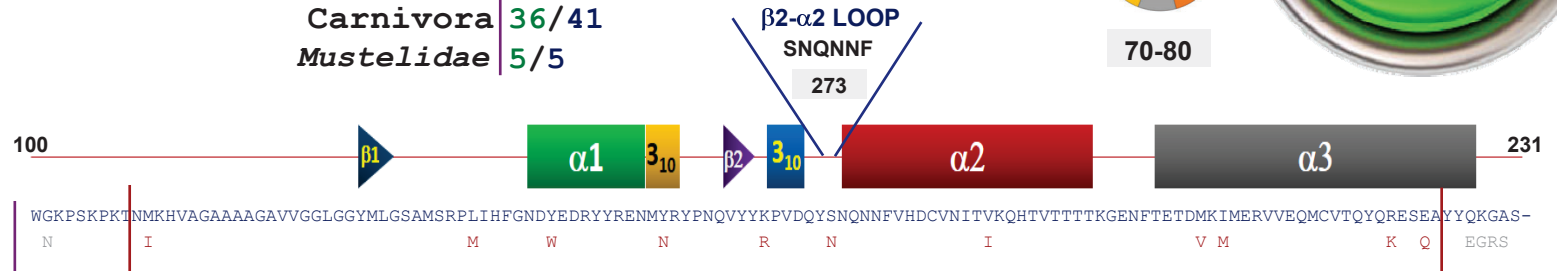

PrP sequence differs by 11 amino acids from the bank vole PrP (see in red)

- No deletions
- No insertions
- No polymorphic variants found

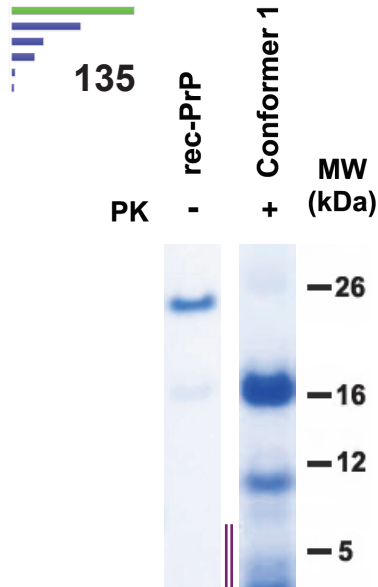

213 AA

1  
Conformers



Tm<sup>Exp</sup>: ND  
ΔΔG: -6.64

### In vitro studies

- TgVole (1x) Propagate
- TgAmerican mink Ongoing

### In vivo studies

- TgVole (1x) Infectious
- TgAmerican mink Not tested

pLDDT [85.39]

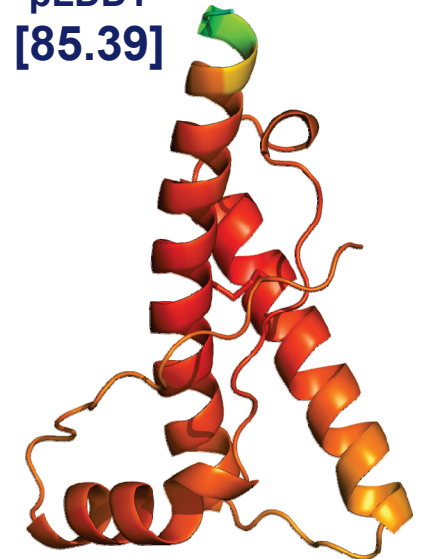

# Walrus

GenBank: EU341508

P42%

8

## *Odobenus rosmarus*

Carnivora 36/41  
 Odobenidae 1/1

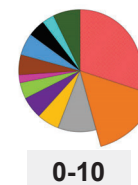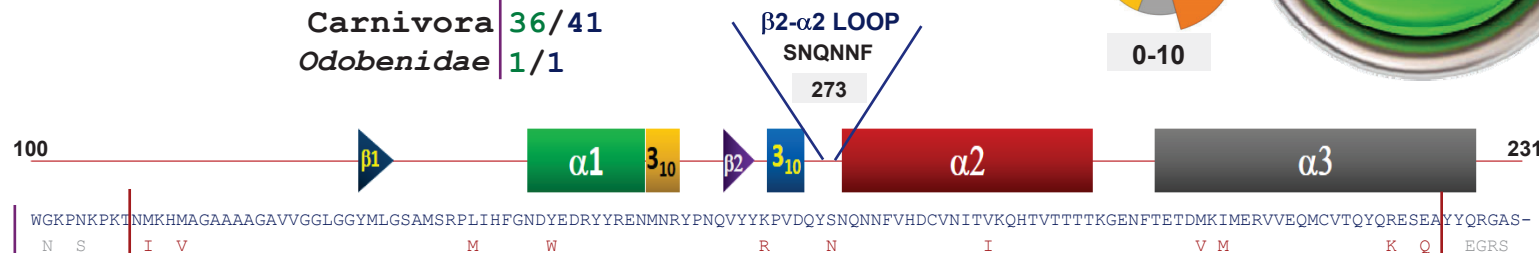

PrP sequence differs by 11 amino acids from the bank vole PrP (see in red)

No deletions  
 No insertions  
 No polymorphic variants found

7 species sharing the same primary sequence

- Australasian fur seal** *Arctocephalus forsteri*
- Brown fur seal** *Arctocephalus pusillus*
- Guadalupe fur seal** *Arctocephalus townsendi*
- Northern fur seal** *Callorhinus ursinus*
- Steller sea lion** *Eumetopias jubatus*
- Sea lion** *Otaria flavescens*
- California sea lion** *Zalophus californianus*

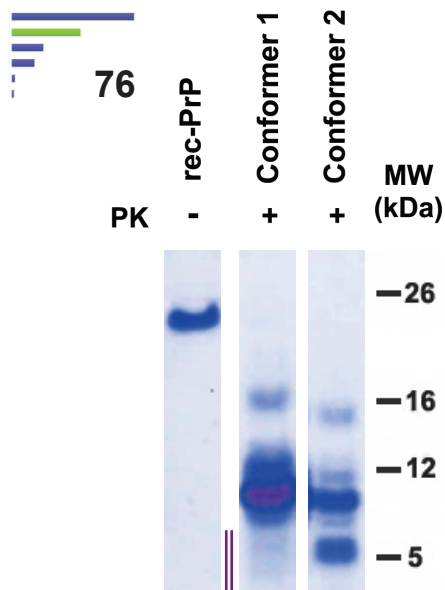

213 AA

2 Conformers

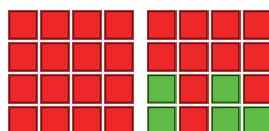

Tm<sup>Exp</sup>: ND  
 $\Delta\Delta G$ : -12.13

### In vitro studies

TgVole (1x) Not tested  
 Walrus Not tested

### In vivo studies

TgVole (1x) Not tested  
 Walrus Not tested

pLDDT [87.15]

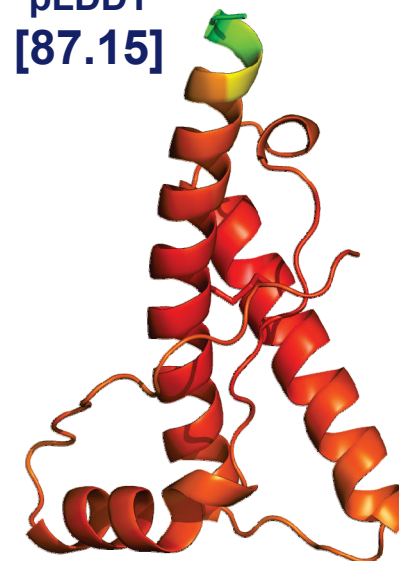

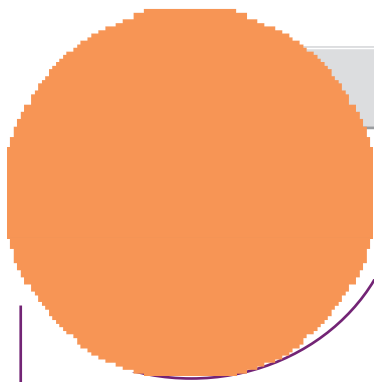

# Lion

GenBank: EU236260

P84%

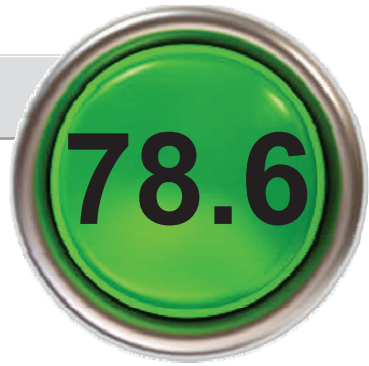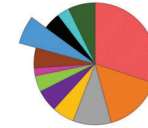

70-80

## Panthera leo

Carnivora 36/41  
Felidae 7/9

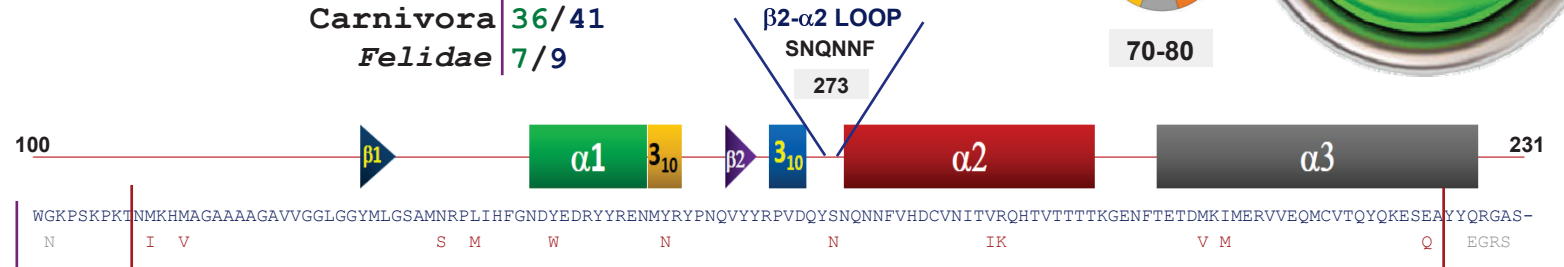

PrP sequence differs by 12 amino acids from the bank vole PrP (see in red)

No deletions  
No insertions  
No polymorphic variants found

6 species sharing the same primary sequence

- Sunda clouded leopard *Neofelis diardi*
- Clouded leopard *Neofelis nebulosa*
- Jaguar *Panthera onca*
- Leopard *Panthera pardus*
- Siberian tiger *Panthera tigris*
- Snow leopard *Panthera uncia*

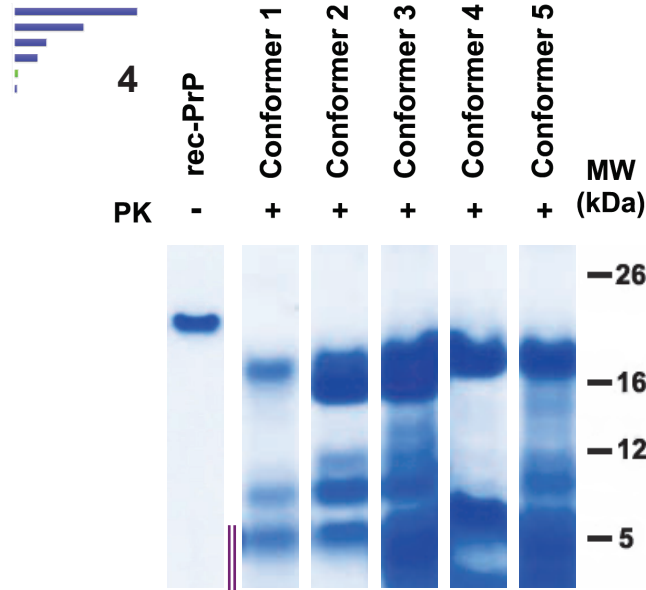

207 AA

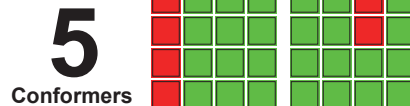

$T_m^{Exp}$ : ND  
 $\Delta\Delta G$ : -6.42

### In vitro studies

|             |            |
|-------------|------------|
| TgVole (1x) | Not tested |
| Lion        | Not tested |

### In vivo studies

|             |            |
|-------------|------------|
| TgVole (1x) | Not tested |
| Lion        | Not tested |

pLDDT [85.76]

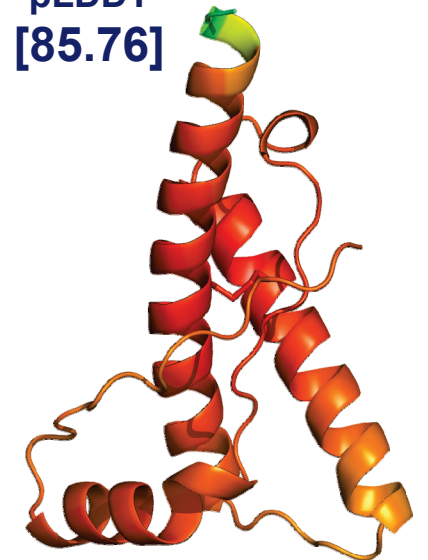

# Common seal

GenBank: EU341509

P47%

11.1



## *Phoca vitulina*

Carnivora 36/41  
Phocidae 4/6

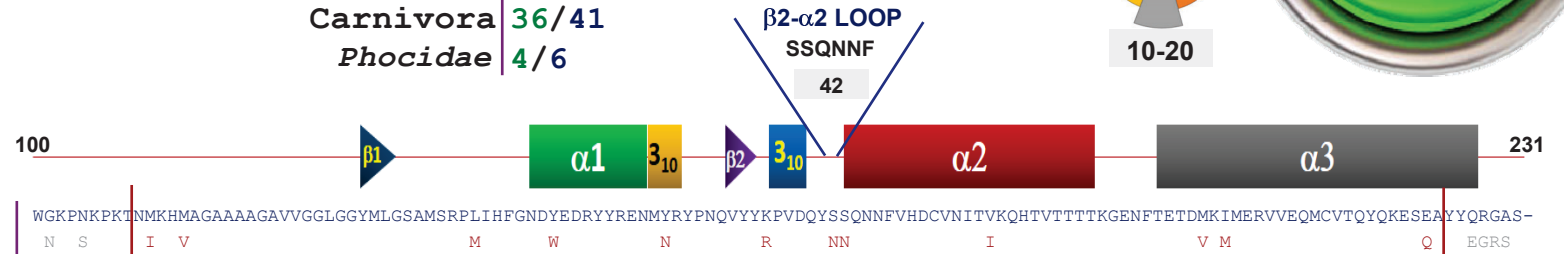

PrP sequence differs by 12 amino acids from the bank vole PrP (see in red)

No deletions  
No insertions  
No polymorphic variants found

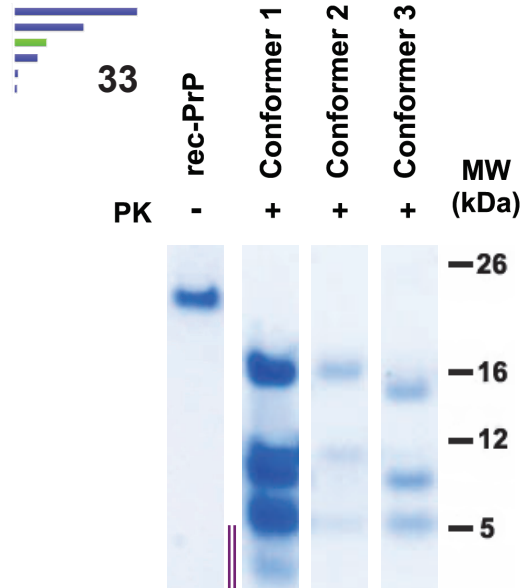

213 AA

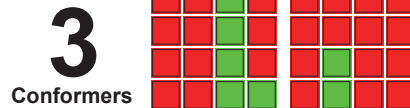

Tm<sup>Exp</sup>: ND  
ΔΔG: -9.87

### *In vitro* studies

TgVole (1x) Not tested  
Common seal Not tested

### *In vivo* studies

TgVole (1x) Not tested  
Common seal Not tested

pLDDT  
[85.59]

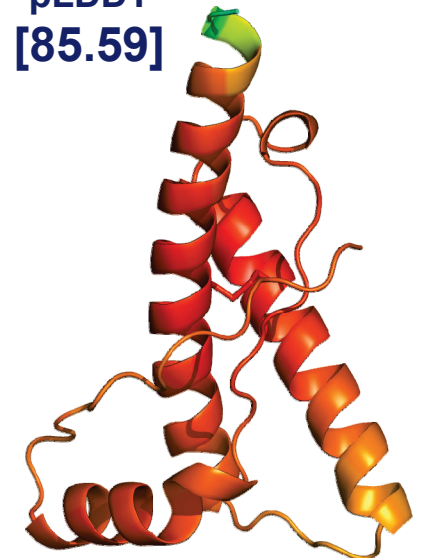

5 species sharing the same primary sequence

- Hooded seal *Cystophora cristata*
- Grey seal *Halichoerus grypus*
- Harp seal *Pagophilus groenlandicus*
- Spotted seal *Phoca largha*
- Baikal seal *Pusa sibirica*

Distinct primary sequence across species

# Kinkajou

GenBank: **BK063964**

P64%

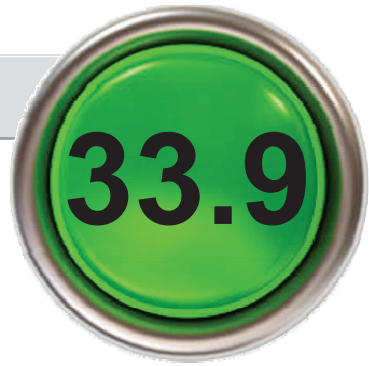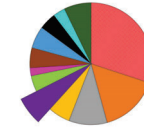

30-40

## Potos flavus

Carnivora **36/41**  
Procyonidae **1/1**

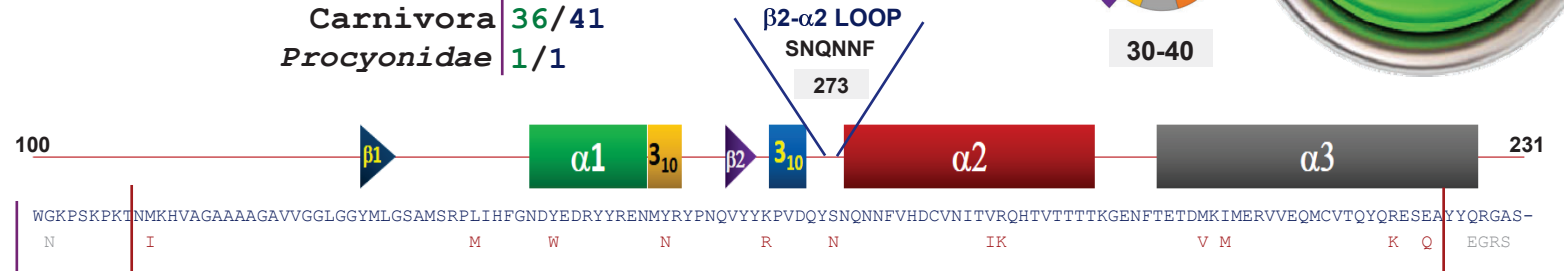

PrP sequence differs by 12 amino acids from the bank vole PrP (see in red)

No deletions  
No insertions  
No polymorphic variants found

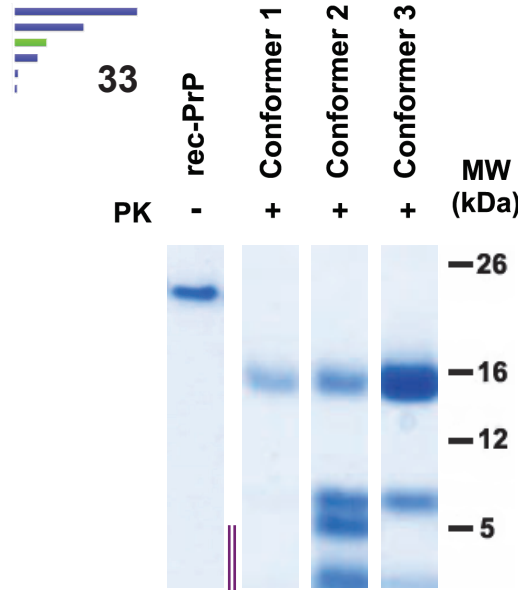

213 AA

**3**  
Conformers

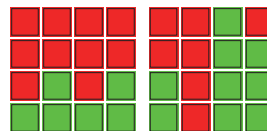

Tm<sup>Exp</sup>: ND

ΔΔG: **-6.27**

### In vitro studies

TgVole (1x) Not tested  
Kinkajou Not tested

### In vivo studies

TgVole (1x) Not tested  
Kinkajou Not tested

pLDDT  
[86.17]

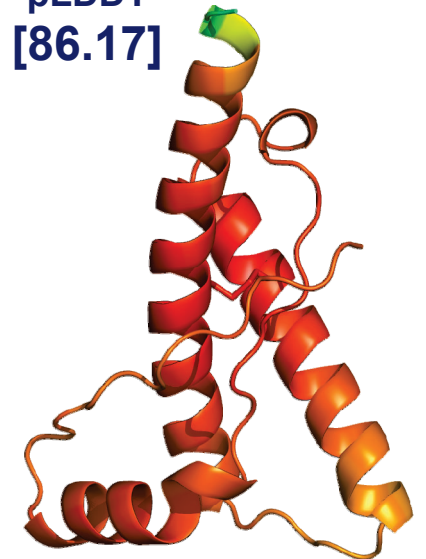



# Aardwolf

GenBank: **BK064008**

P73%

59.3

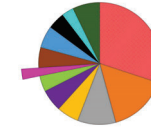

50-60

## *Proteles cristata*

Carnivora 36/41  
Hyaenidae 1/2

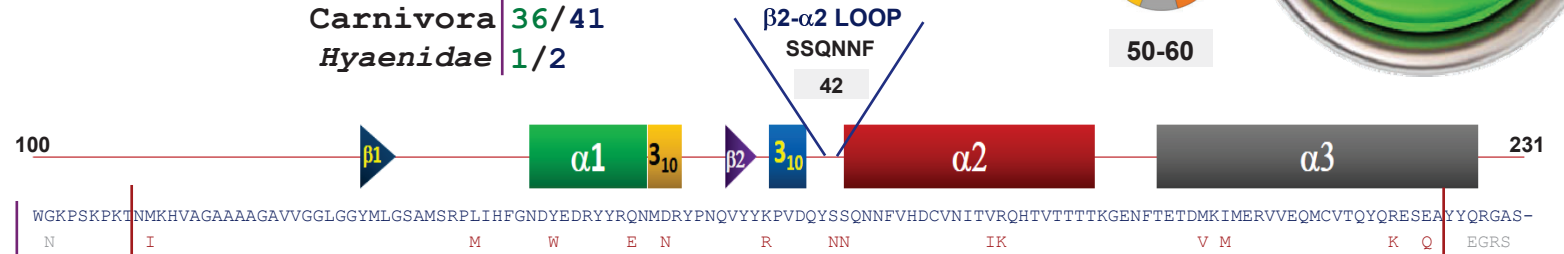

PrP sequence differs by 14 amino acids from the bank vole PrP (see in red)

No deletions  
No insertions  
No polymorphic variants found

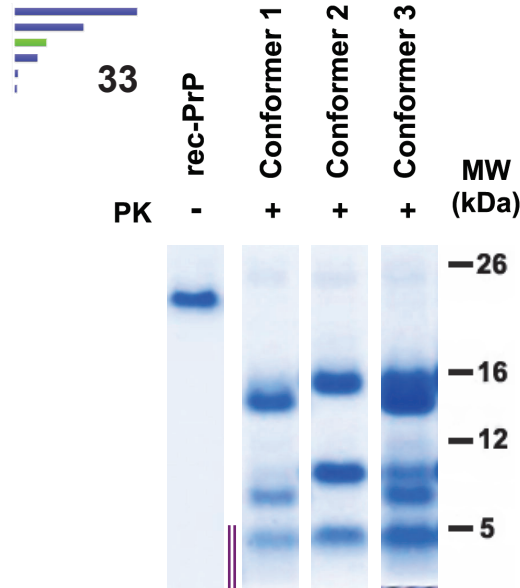

213 AA

3  
Conformers

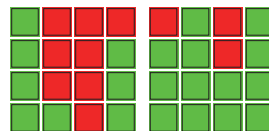

Tm<sup>Exp</sup>: ND

ΔΔG: -10.08

### *In vitro* studies

TgVole (1x) Not tested

Aardwolf Not tested

### *In vivo* studies

TgVole (1x) Not tested

Aardwolf Not tested

pLDDT  
[87.05]

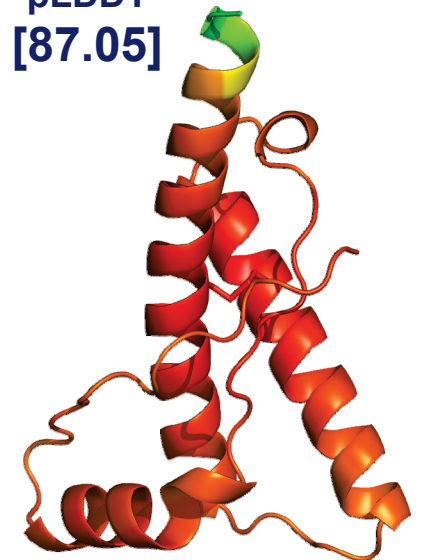

Distinct primary sequence across species

# Ringed seal

GenBank: **BK064218**

P29%



0

## *Pusa hispida saimensis*

Carnivora 36/41  
Phocidae 4/6

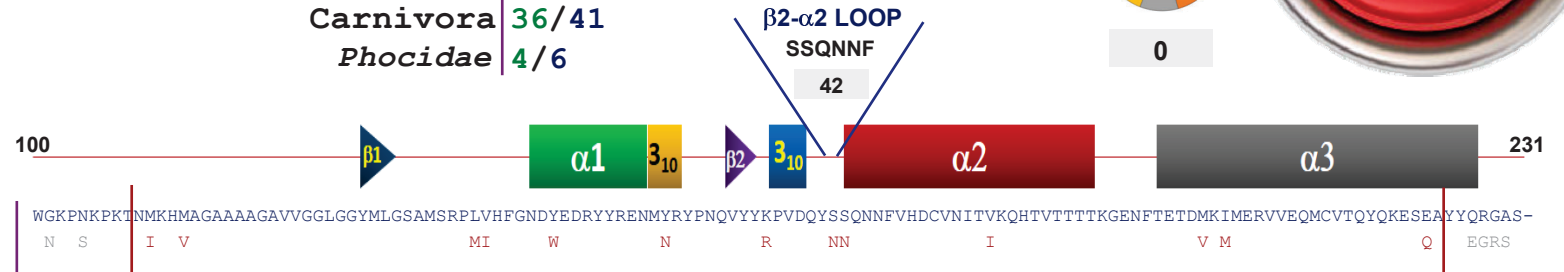

PrP sequence differs by 13 amino acids from the bank vole PrP (see in red)

- No deletions
- No insertions
- No polymorphic variants found

Tm<sup>Exp</sup>: ND

ΔΔG: -14.83

Distinct primary sequence across species

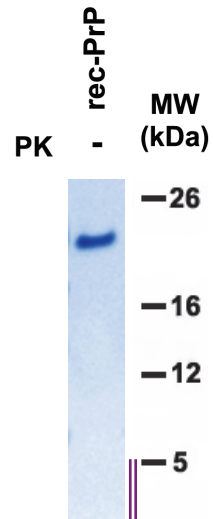

213 AA

0  
Conformers

NO  
MISFOLDING

*In vitro* studies

NOT  
APPLICABLE

*In vivo* studies

NOT  
APPLICABLE

pLDDT  
[92.7]

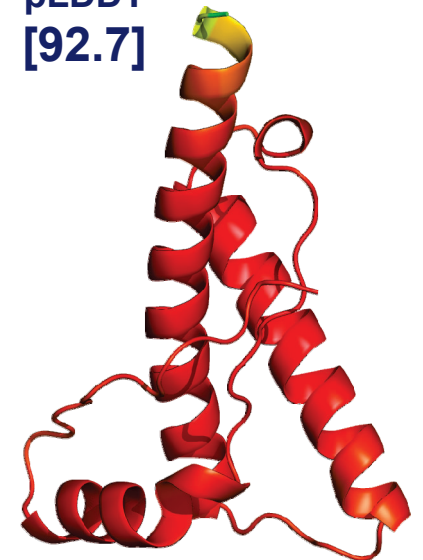

1 species sharing the same primary sequence

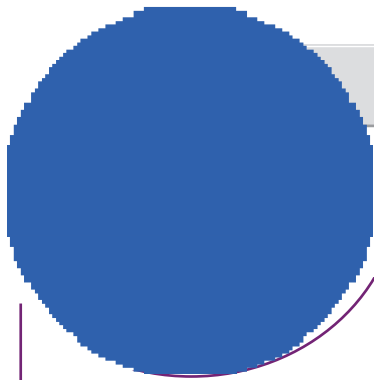

# Western spotted skunk

GenBank: **BK064000**

P53%

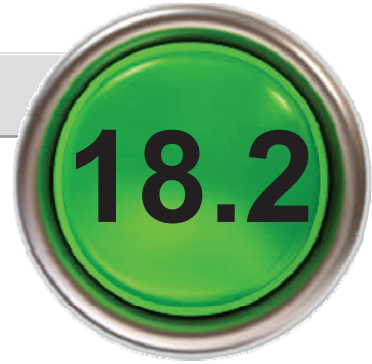

## *Spilogale gracilis*

Carnivora 36/41  
Mephitidae 2/2

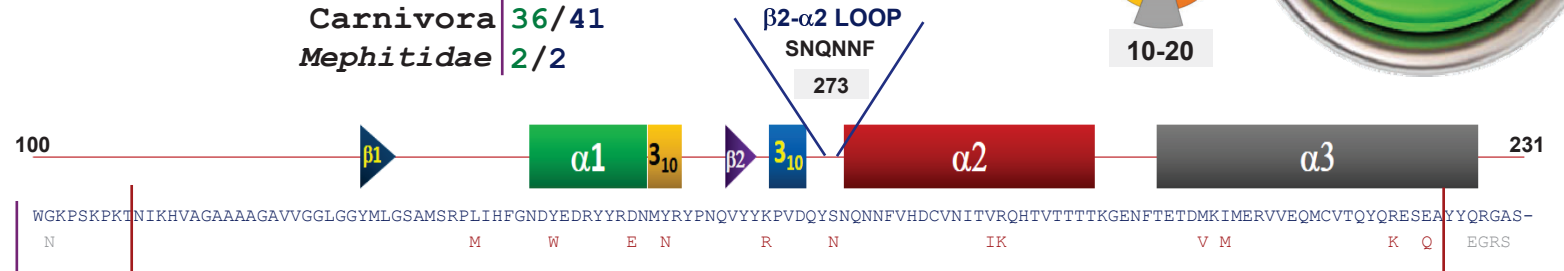

PrP sequence differs by 12 amino acids from the bank vole PrP (see in red)

- No deletions
- No insertions
- No polymorphic variants found

Eastern spotted skunk  
*Spilogale putorius interrupta*

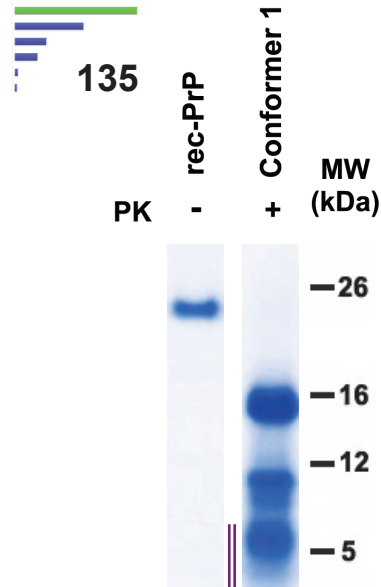

213 AA

1  
Conformers

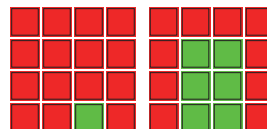

T<sub>m</sub><sup>Exp</sup>: ND  
ΔΔG: -1.74

### *In vitro* studies

TgVole (1x) Not tested

Western spotted skunk Not tested

### *In vivo* studies

TgVole (1x) Not tested

Western spotted skunk Not tested

pLDDT  
[85.27]

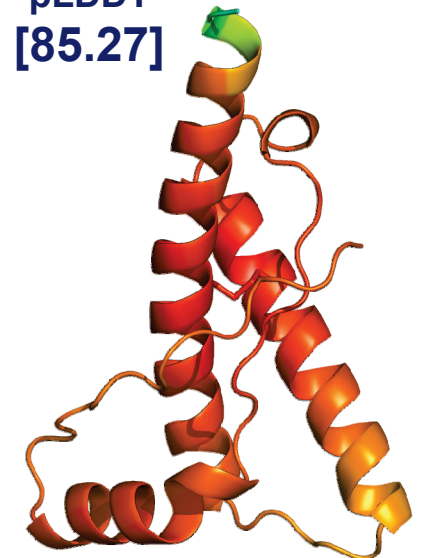

# Meerkat

GenBank: XP\_029772432

P89%

87.5

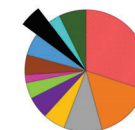

80-90

## Suricata suricatta

Carnivora 36/41  
Herpestidae 4/4

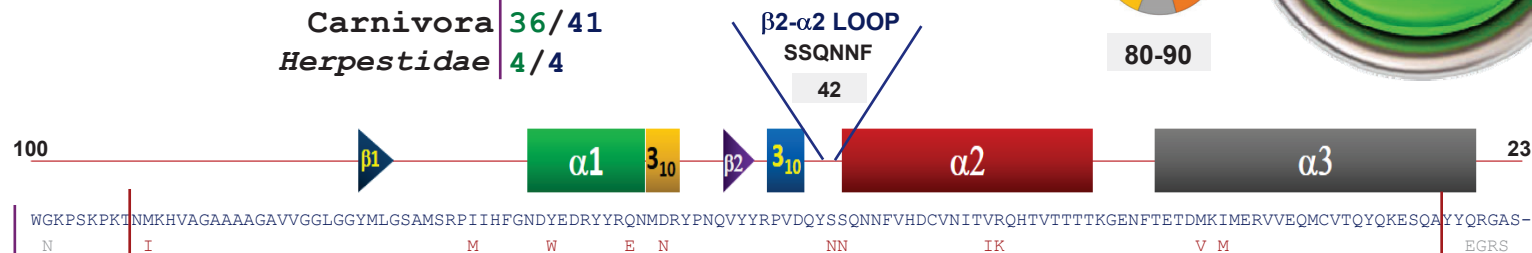

PrP sequence differs by 11 amino acids from the bank vole PrP (see in red)

No deletions  
No insertions  
No polymorphic variants found

Distinct primary sequence across species

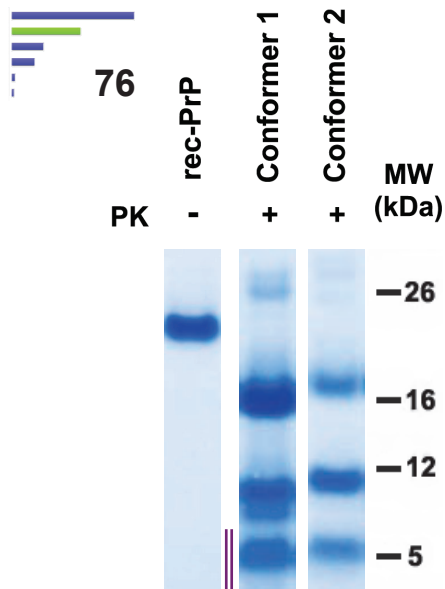

209 AA

2  
Conformers

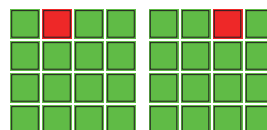

Tm<sup>Exp</sup>: ND

ΔΔG: -9.09

### In vitro studies

TgVole (1x) Not tested  
Meerkat Not tested

### In vivo studies

TgVole (1x) Not tested  
Meerkat Not tested

pLDDT [85.16]

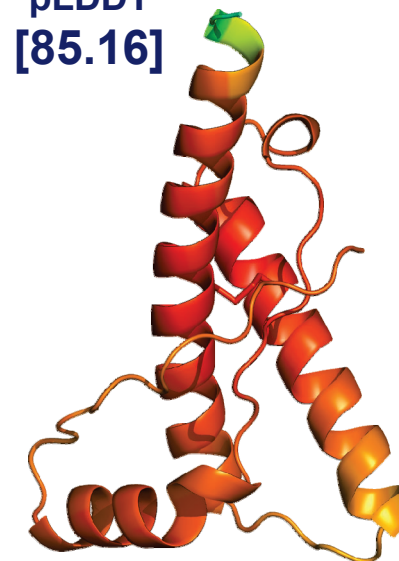

# Spectacled bear

GenBank: **BK064152**

**P73%**

**53.6**

*Tremarctos ornatus*

Carnivora **36/41**  
Ursidae **2/2**

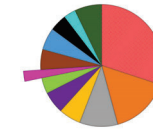

50-60

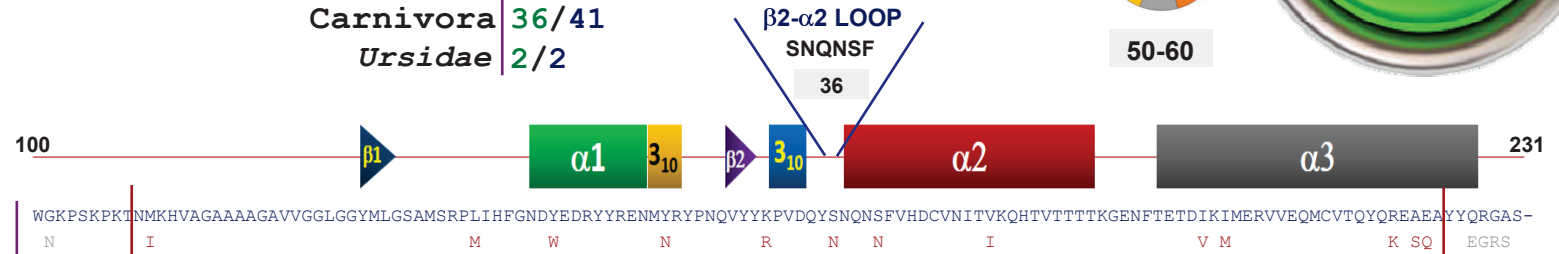

PrP sequence differs by 13 amino acids from the bank vole PrP (see in red)

- No deletions
- No insertions
- No polymorphic variants found

Distinct primary sequence across species

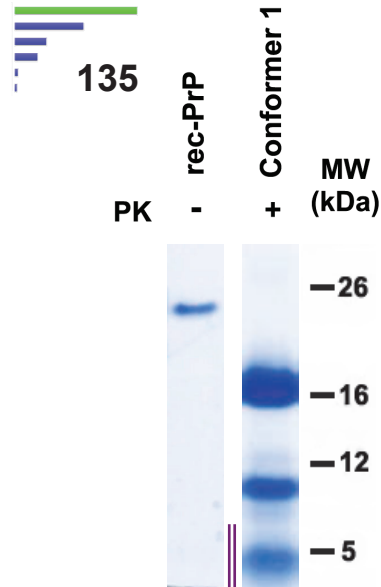

213 AA

**1**  
Conformers

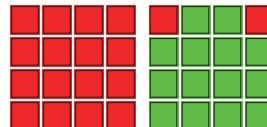

$T_m^{Exp}$ : ND  
 $\Delta\Delta G$ : **-10.4**

### *In vitro* studies

- TgVole (1x) Not tested
- Spectacled bear Not tested

### *In vivo* studies

- TgVole (1x) Not tested
- Spectacled bear Not tested

pLDDT  
**[86.62]**

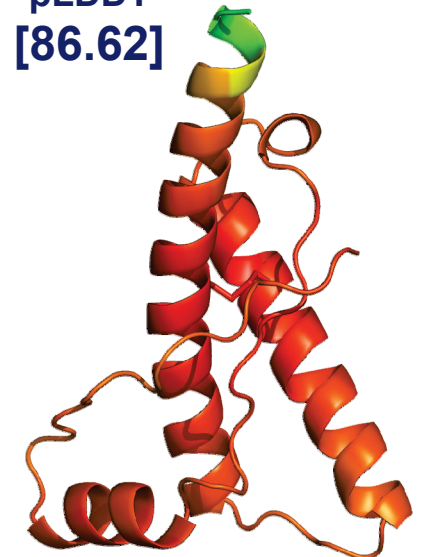

# Brown bear

GenBank: JX218961

P69%

44.6

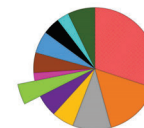

40-50

## *Ursus arctos*

Carnivora 36/41

Ursidae 2/2

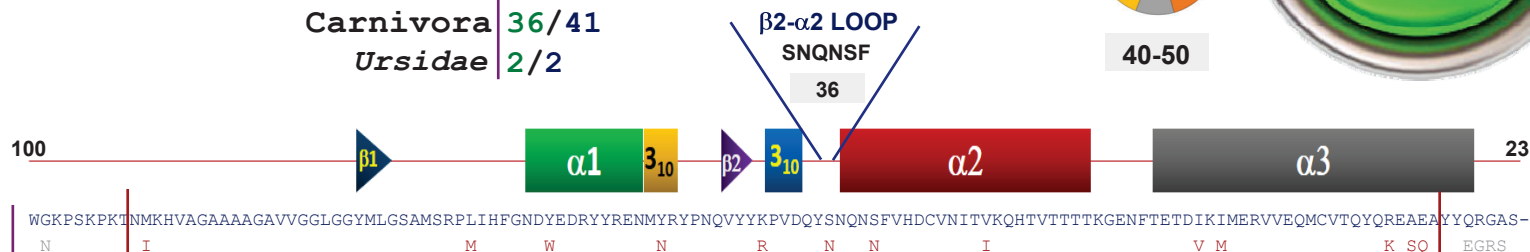

PrP sequence differs by 13 amino acids from the bank vole PrP (see in red)

No deletions  
No insertions  
No polymorphic variants found

5 species sharing the same primary sequence

- Giant panda *Ailuropoda melanoleuca*
- Sun bear *Helarctos malayanus*
- American black bear *Ursus americanus*
- Polar bear *Ursus maritimus*
- Asian black bear *Ursus thibetanus thibetanus*

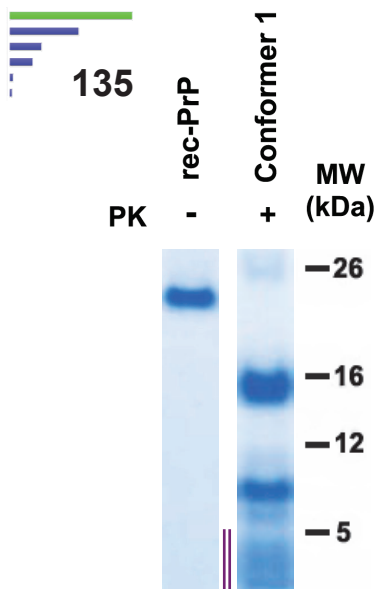

213 AA

1  
Conformers

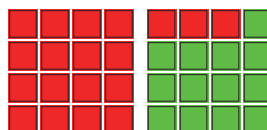

Tm<sup>Exp</sup>: ND

ΔΔG: -10.67

### *In vitro* studies

TgVole (1x) Not tested

Brown bear Not tested

### *In vivo* studies

TgVole (1x) Not tested

Brown bear Not tested

pLDDT  
[84.84]

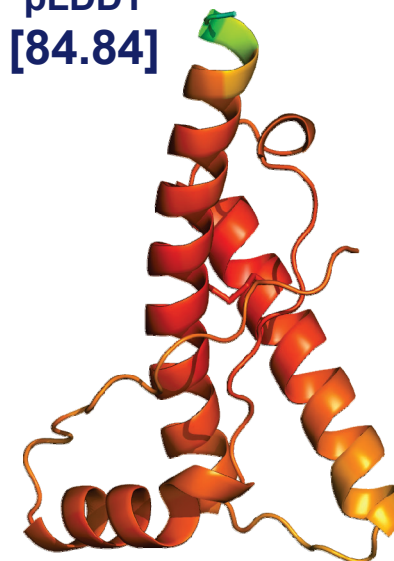

# Red fox

GenBank: XM\_026012328

P78%

67.9

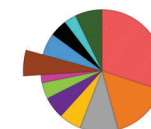

60-70

## Vulpes vulpes

Carnivora 36/41

Canidae 5/5

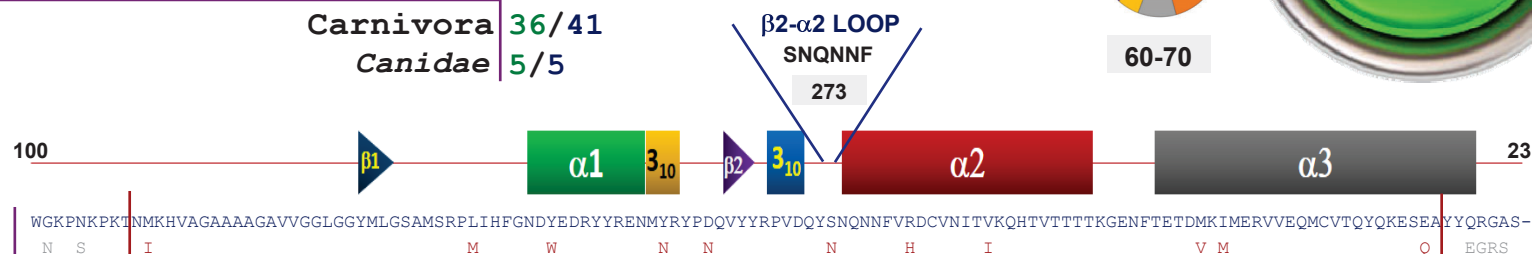

PrP sequence differs by 11 amino acids from the bank vole PrP (see in red)

No deletions  
No insertions  
No polymorphic variants found

9 species sharing the same primary sequence

- Side-striped jackal *Canis adustus*
- Raccoon dog *Nyctereutes procyonoides*
- Bat-eared fox *Otocyon megalotis*
- Gray fox *Urocyon cinereoargenteus*
- Island fox *Urocyon littoralis*
- Corsac fox *Vulpes corsac*
- Arctic fox *Vulpes lagopus*
- Swift fox *Vulpes velox*
- Fennec fox *Vulpes zerda*

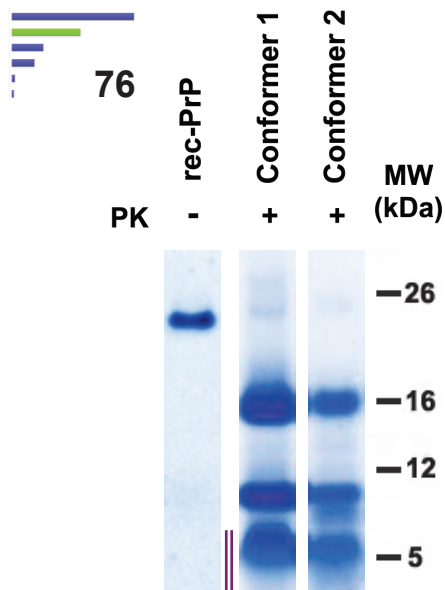

213 AA

2 Conformers

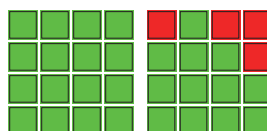

Tm<sup>Exp</sup>: ND

ΔΔG: -8.8

### In vitro studies

TgVole (1x) Not tested  
Red fox Not tested

### In vivo studies

TgVole (1x) Not tested  
Red fox Not tested

pLDDT [91.75]

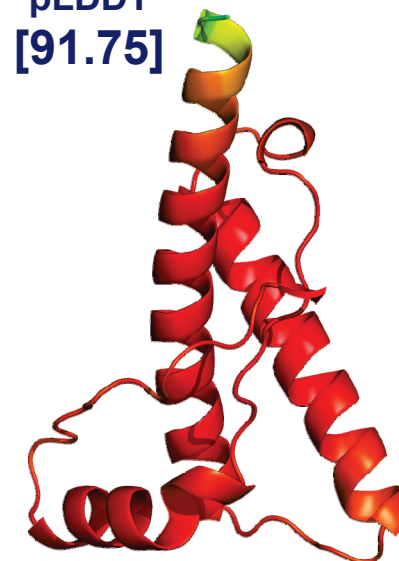

Distinct primary sequence across species

# Whale

GenBank: DQ884475

P29%

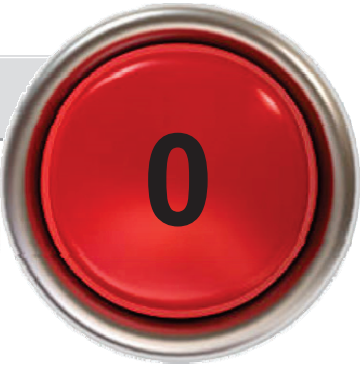

0

## *Balaenoptera physalus*

Cetacea 0/14

*Balaenopteridae* 0/1

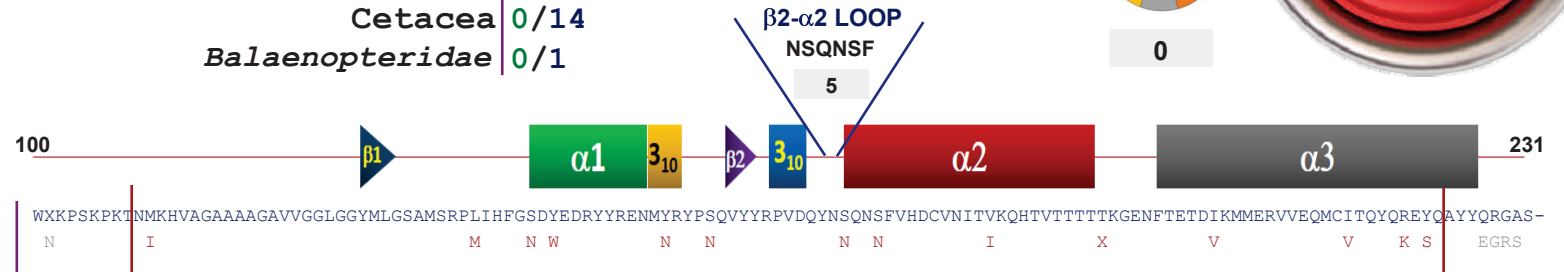

PrP sequence differs by 14 amino acids from the bank vole PrP (see in red)

- No deletions
- One insertion
- No polymorphic variants found

Tm<sup>Exp</sup>: ND

ΔΔG: -16.96

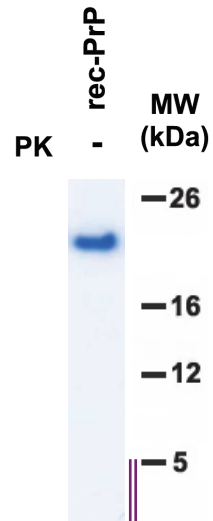

213 AA

0 Conformers

**NO MISFOLDING**

*In vitro* studies

**NOT APPLICABLE**

*In vivo* studies

**NOT APPLICABLE**

pLDDT [86.98]

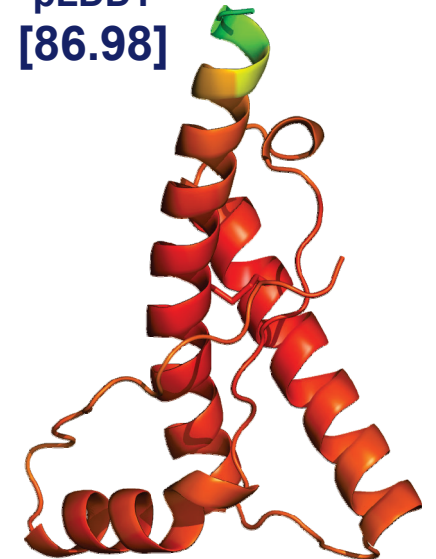



# Beluga whale

GenBank: XM\_022556485

P29%

0

## Delphinapterus leucas

Cetacea 0/14

Monodontidae 0/1

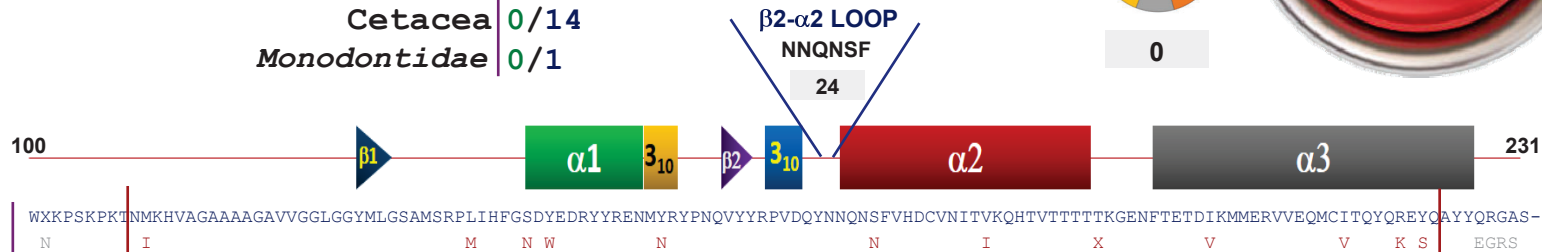

PrP sequence differs by 12 amino acids from the bank vole PrP (see in red)

- No deletions
- One insertion
- No polymorphic variants found

$T_m^{Exp}$ : ND

$\Delta\Delta G$ : -17.39

Distinct primary sequence across species

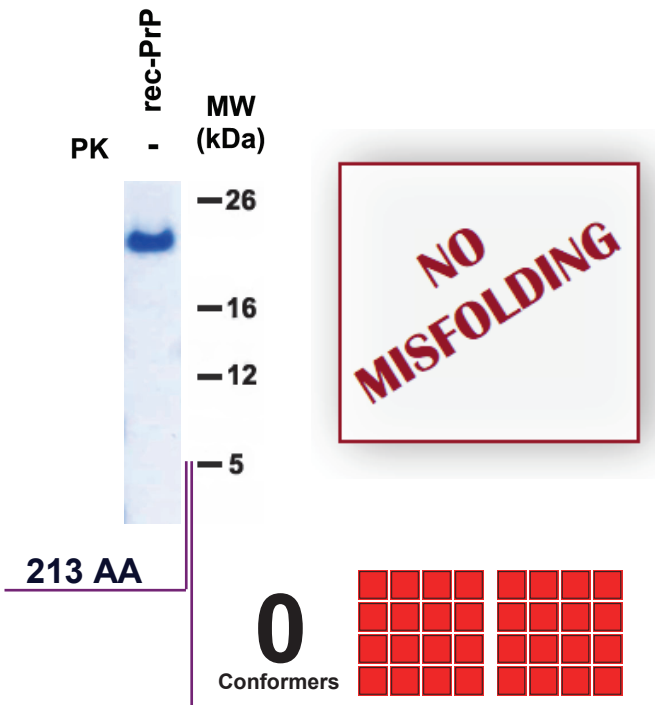

*In vitro* studies

**NOT APPLICABLE**

*In vivo* studies

**NOT APPLICABLE**

pLDDT [85.62]

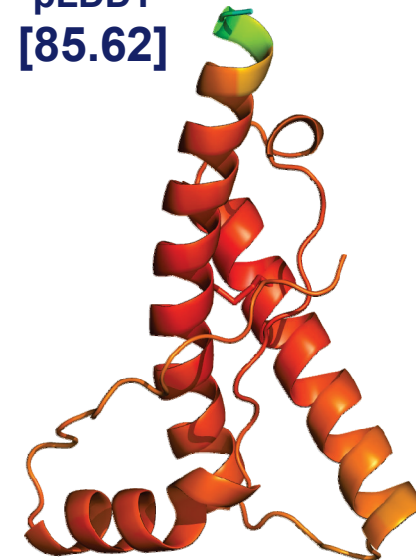

# Northern bottlenose whale

GenBank: **BK064204**

P29%

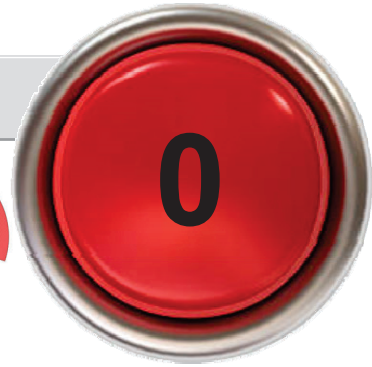

0

## *Hyperoodon ampullatus*

Cetacea 0/14  
Ziphiidae 0/4

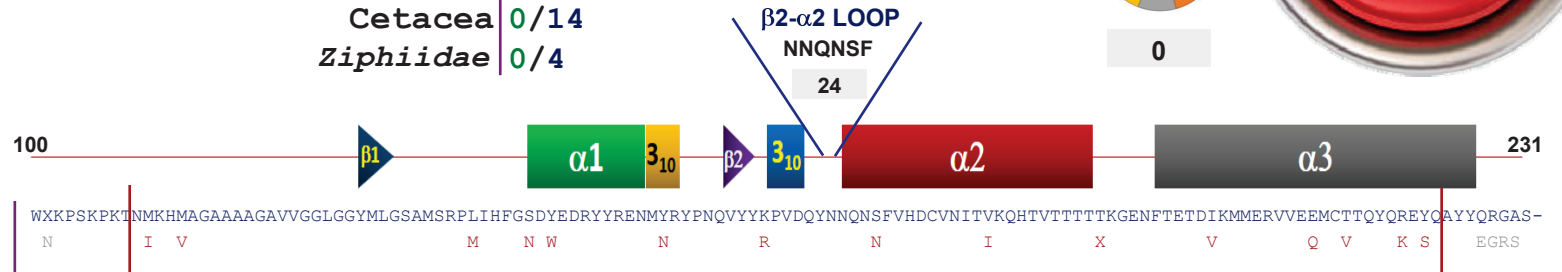

PrP sequence differs by 15 amino acids from the bank vole PrP (see in red)

No deletions  
One insertion  
No polymorphic variants found

Tm<sup>Exp</sup>: ND

ΔΔG: -20.25

Distinct primary sequence across species

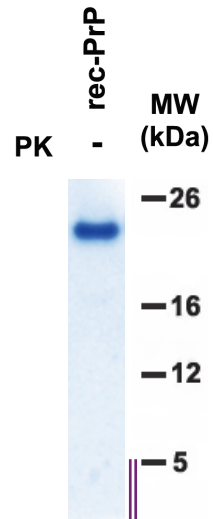

213 AA

0  
Conformers

**NO  
MISFOLDING**

*In vitro* studies

**NOT  
APPLICABLE**

*In vivo* studies

**NOT  
APPLICABLE**

pLDDT  
[87.26]

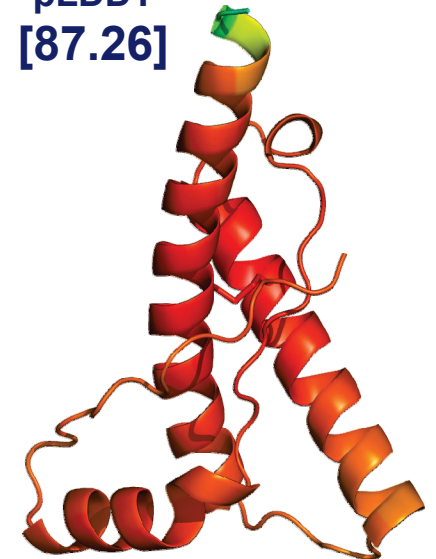

# Amazon river dolphin

GenBank: **BK064059**

P29%

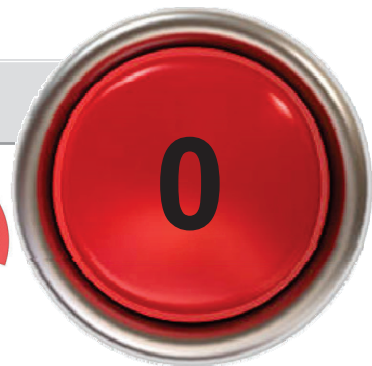

0

## *Inia geoffrensis*

Cetacea 0/14  
Iniidae 0/3

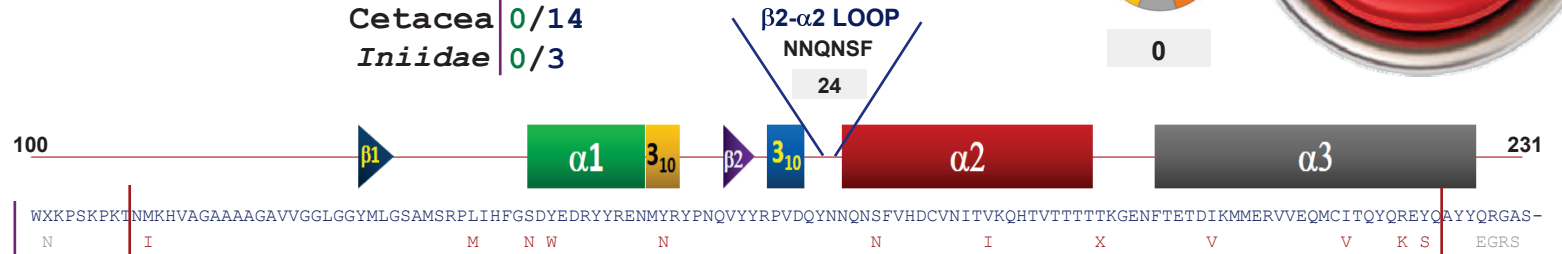

PrP sequence differs by 12 amino acids from the bank vole PrP (see in red)

- No deletions
- One insertion
- No polymorphic variants found

Tm<sup>Exp</sup>: ND

ΔΔG: -17.25

Distinct primary sequence across species

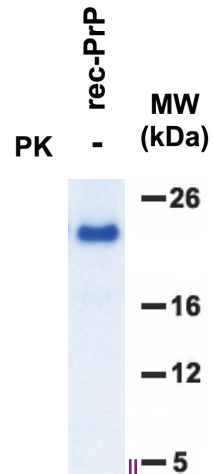

213 AA

0  
Conformers

**NO MISFOLDING**

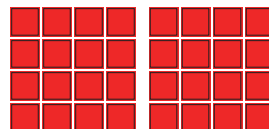

*In vitro* studies

**NOT APPLICABLE**

*In vivo* studies

**NOT APPLICABLE**

pLDDT [86.97]

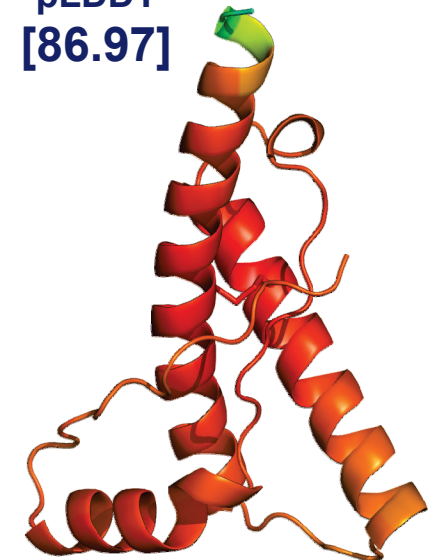

# Pacific white-sided dolphin

GenBank: XM\_027118243

## Lagenorhynchus obliquidens

Cetacea 0/14  
Delphinidae 0/2

P29%



0

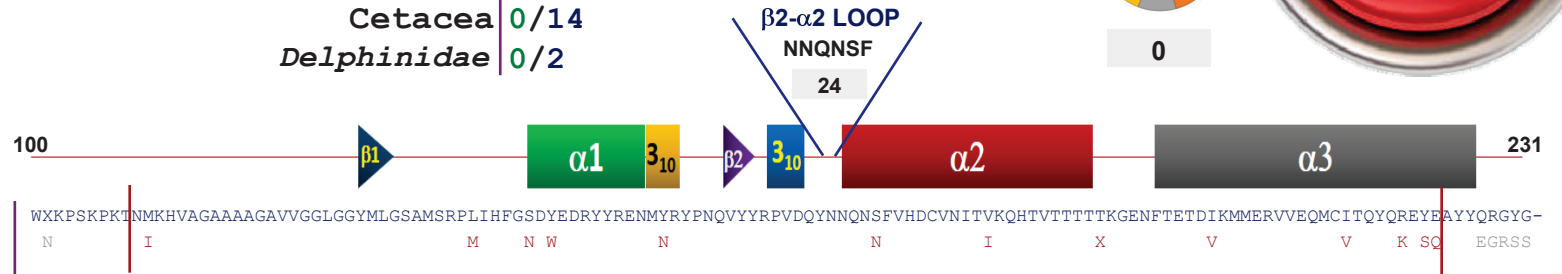

PrP sequence differs by 13 amino acids from the bank vole PrP (see in red)

- No deletions
- One insertion
- No polymorphic variants found

Tm<sup>Exp</sup>: ND

ΔΔG: -30.33

Distinct primary sequence across species

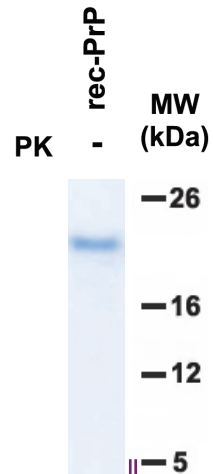

213 AA

0  
Conformers

NO  
MISFOLDING

In vitro studies

NOT  
APPLICABLE

In vivo studies

NOT  
APPLICABLE

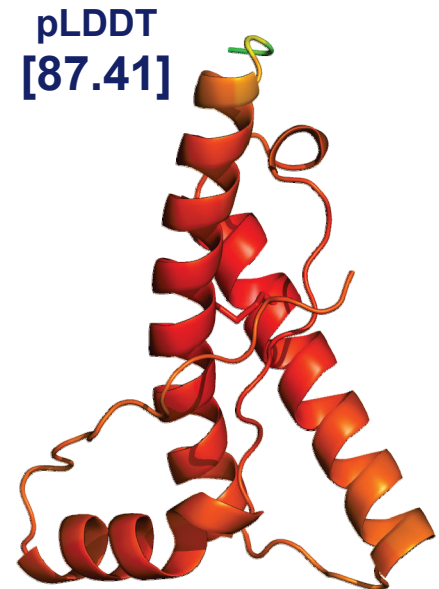

Distinct primary sequence across species

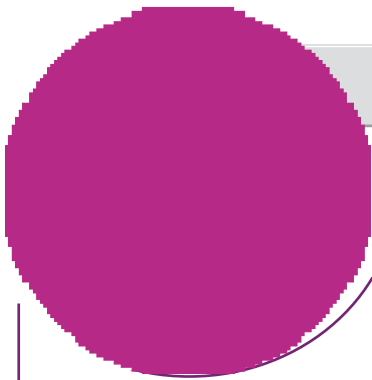

# Baiji

GenBank: XM\_007463977

P29%

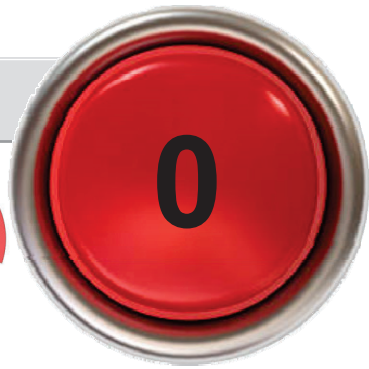

0

## Lipotes vexillifer

Cetacea 0/14  
Iniidae 0/3

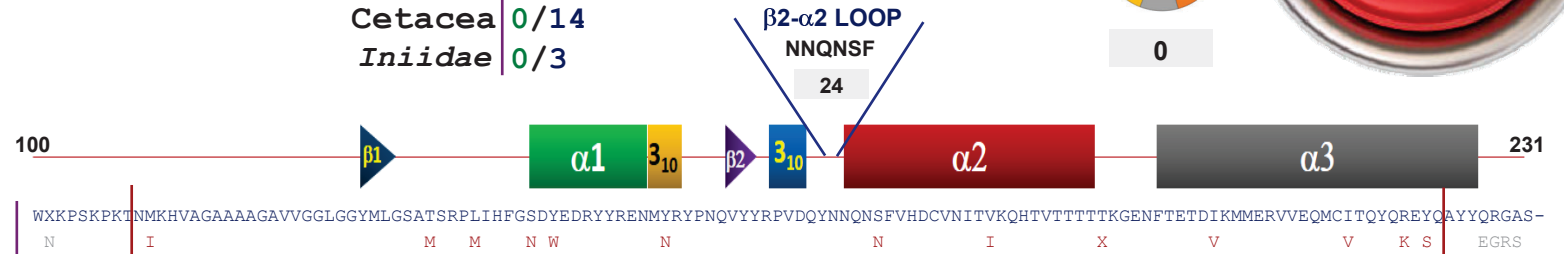

PrP sequence differs by 13 amino acids from the bank vole PrP (see in red)

- No deletions
- One insertion
- No polymorphic variants found

Tm<sup>Exp</sup>: ND

ΔΔG: -10.64

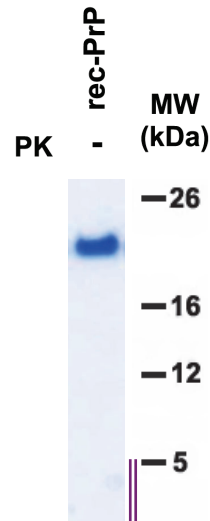

213 AA

0  
Conformers

**NO MISFOLDING**

*In vitro* studies

**NOT APPLICABLE**

*In vivo* studies

**NOT APPLICABLE**

pLDDT [85.68]

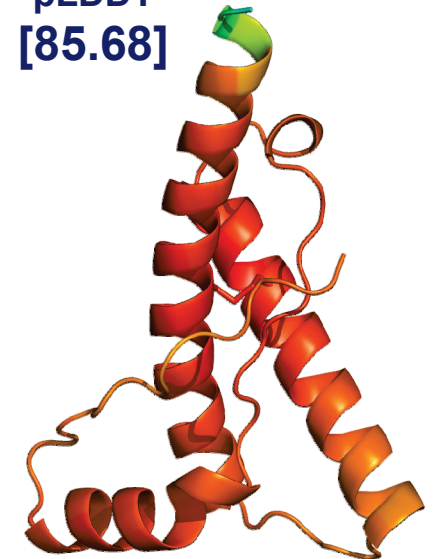

# Sowerby's beaked whale

GenBank: **BK064083**

P29%



0

## Mesoplodon bidens

Cetacea 0/14  
Ziphiidae 0/4

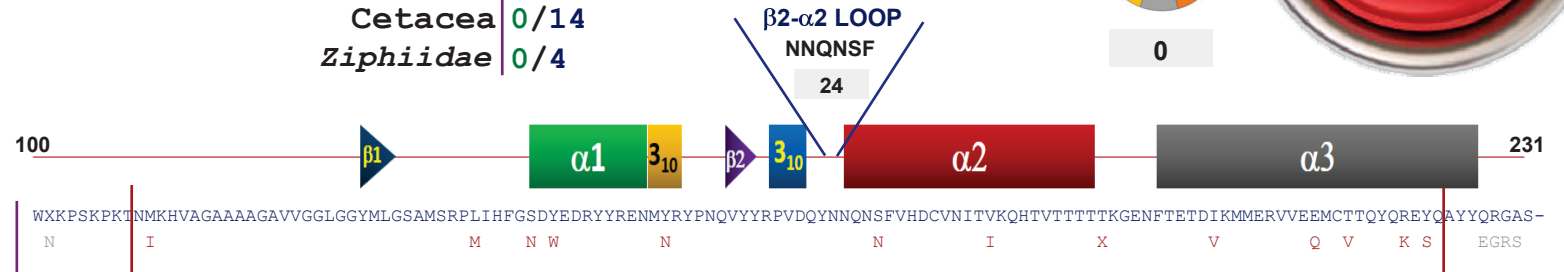

PrP sequence differs by 13 amino acids from the bank vole PrP (see in red)

- No deletions
- One insertion
- No polymorphic variants found

Tm<sup>Exp</sup>: ND

ΔΔG: -15.45

Distinct primary sequence across species

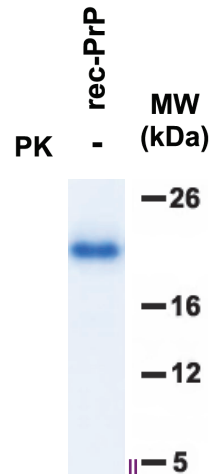

213 AA

0  
Conformers

**NO  
MISFOLDING**

*In vitro* studies

**NOT  
APPLICABLE**

*In vivo* studies

**NOT  
APPLICABLE**

pLDDT  
[87.82]

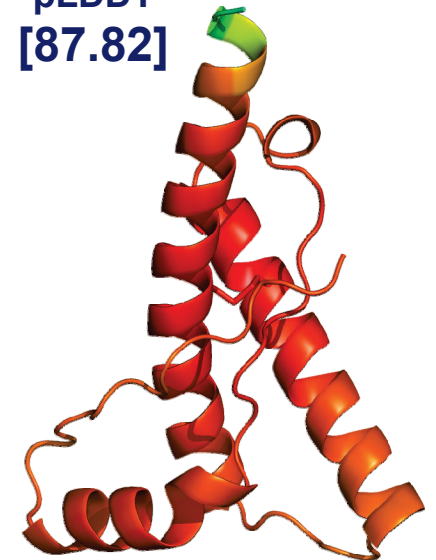

# Stejneger's beaked whale

GenBank: **BK064780**

P29%



0

## Mesoplodon stejnegeri

Cetacea 0/14  
Ziphiidae 0/4

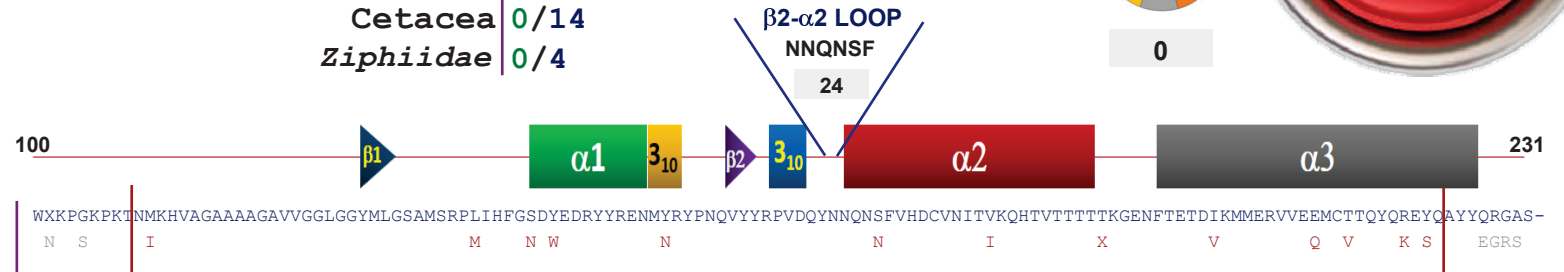

PrP sequence differs by 13 amino acids from the bank vole PrP (see in red)

No deletions  
One insertion  
No polymorphic variants found

Tm<sup>Exp</sup>: ND

ΔΔG: -16.57

Distinct primary sequence across species

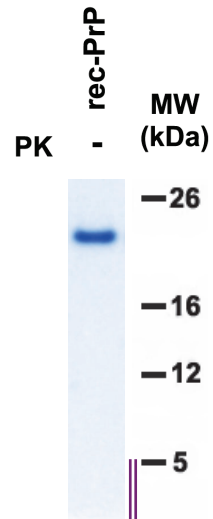

213 AA

0  
Conformers

**NO  
MISFOLDING**

*In vitro* studies

**NOT  
APPLICABLE**

*In vivo* studies

**NOT  
APPLICABLE**

pLDDT  
[85.93]

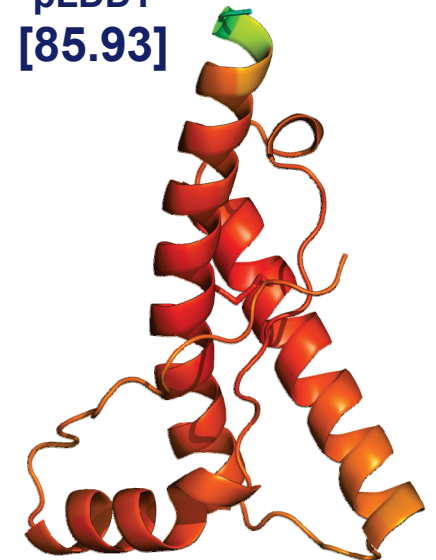

# Narrow-ridged finless porpoise

GenBank: XM\_024764249

## *Neophocaena phocaenoides*

Cetacea 0/14

Phocoenidae 0/1

P29%



0

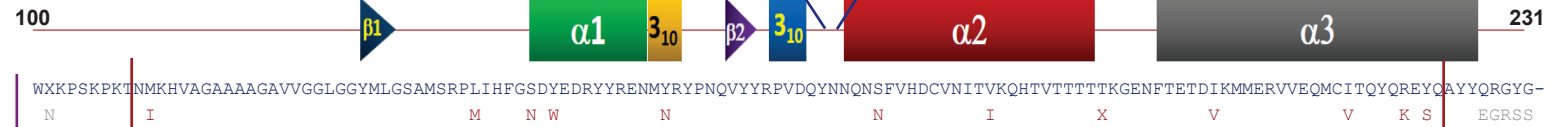

PrP sequence differs by 12 amino acids from the bank vole PrP (see in red)

- No deletions
- One insertion
- No polymorphic variants found

Tm<sup>Exp</sup>: ND

ΔΔG: -24.72

Distinct primary sequence across species

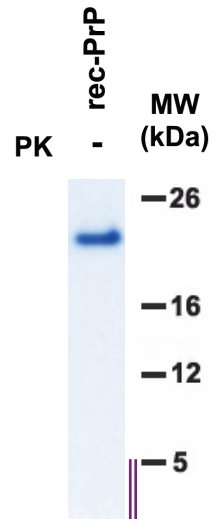

213 AA

0 Conformers

NO MISFOLDING

*In vitro* studies

NOT APPLICABLE

*In vivo* studies

NOT APPLICABLE

pLDDT [86.94]

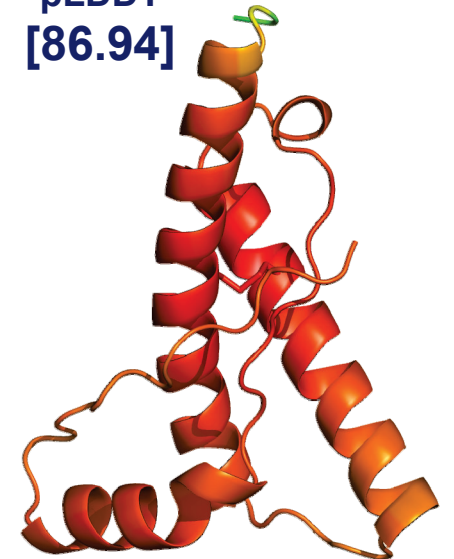



# Sperm whale

GenBank: XM\_007123285

P29%

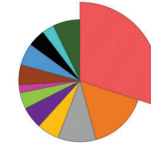

0

## Physeter catodon

Cetacea 0/14

Physeteridae 0/1

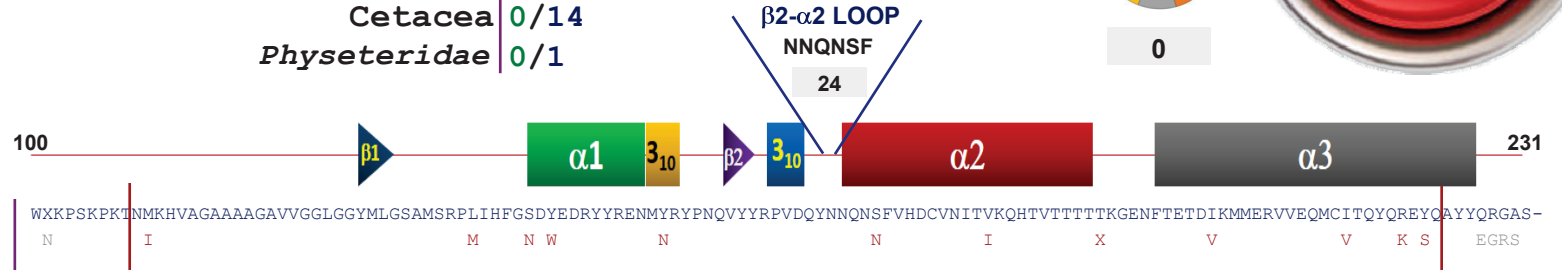

PrP sequence differs by 12 amino acids from the bank vole PrP (see in red)

- No deletions
- One insertion
- No polymorphic variants found

Tm<sup>Exp</sup>: ND

ΔΔG: -16.05

Distinct primary sequence across species

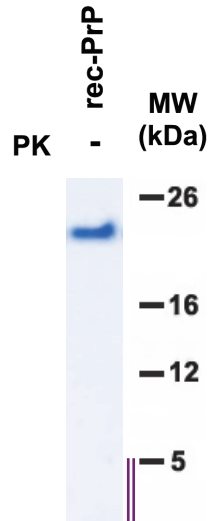

215 AA

0 Conformers

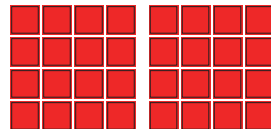

**NO MISFOLDING**

*In vitro* studies

**NOT APPLICABLE**

*In vivo* studies

**NOT APPLICABLE**

pLDDT [86.76]

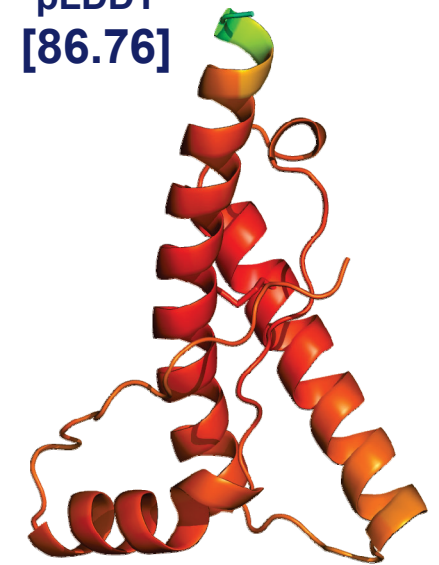

Distinct primary sequence across species

# South Asian river dolphin

GenBank: **BK064007**

*Platanista gangetica*

Cetacea 0/14

Platanistidae 0/1

P29%

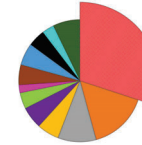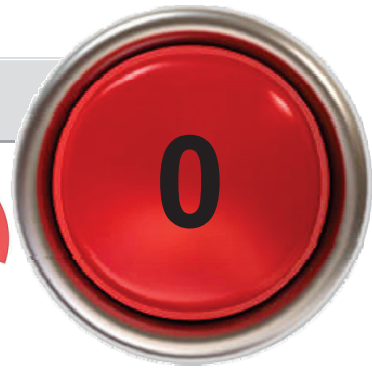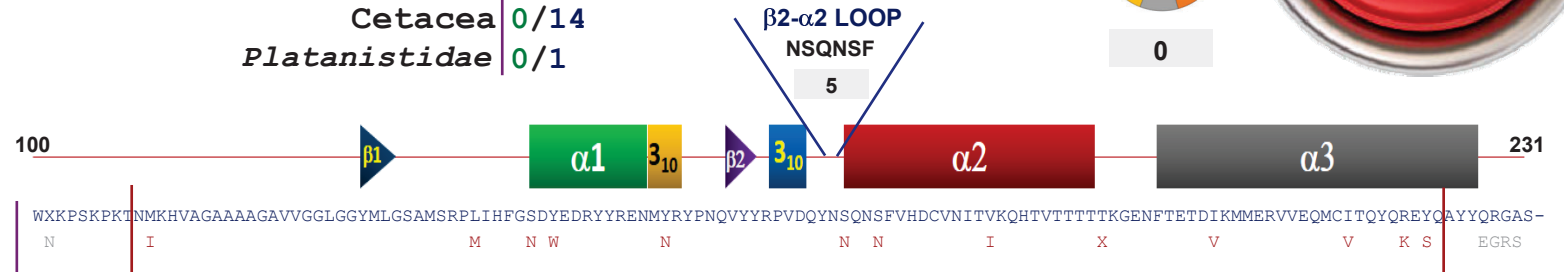

PrP sequence differs by 13 amino acids from the bank vole PrP (see in red)

- No deletions
- One insertion
- No polymorphic variants found

$T_m^{Exp}$ : ND

$\Delta\Delta G$ : -14.99

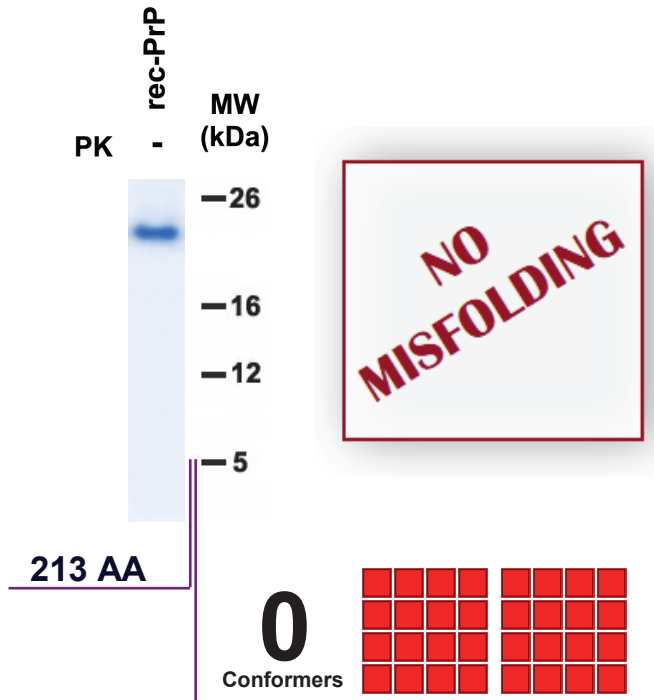

*In vitro* studies

**NOT APPLICABLE**

*In vivo* studies

**NOT APPLICABLE**

pLDDT [86.35]

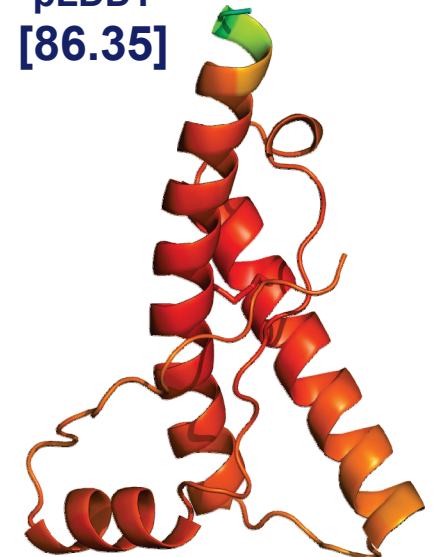

# La Plata dolphin

GenBank: **BK064129**

P29%



0

## *Pontoporia blainvillei*

Cetacea 0/14  
Iniidae 0/3

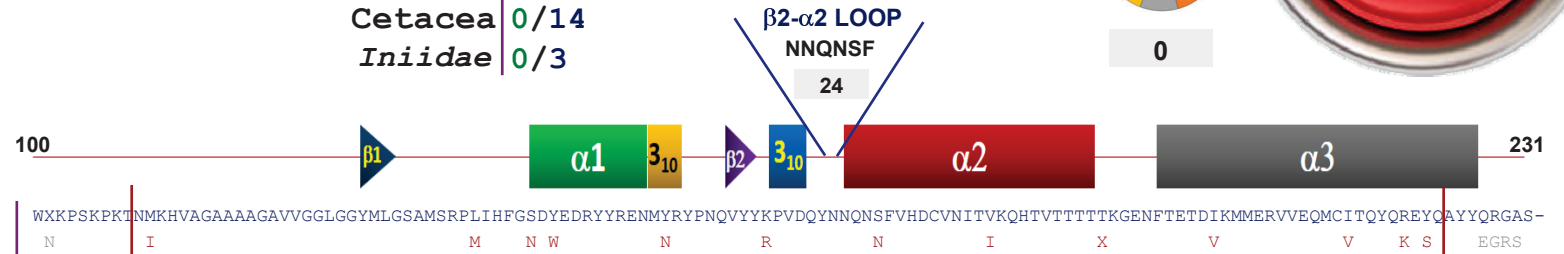

PrP sequence differs by 13 amino acids from the bank vole PrP (see in red)

No deletions  
One insertion  
No polymorphic variants found

Tm<sup>Exp</sup>: ND

ΔΔG: **-13.69**

Distinct primary sequence across species

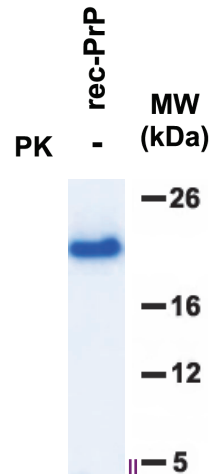

213 AA

0  
Conformers

**NO  
MISFOLDING**

*In vitro* studies

**NOT  
APPLICABLE**

*In vivo* studies

**NOT  
APPLICABLE**

pLDDT  
**[85.83]**

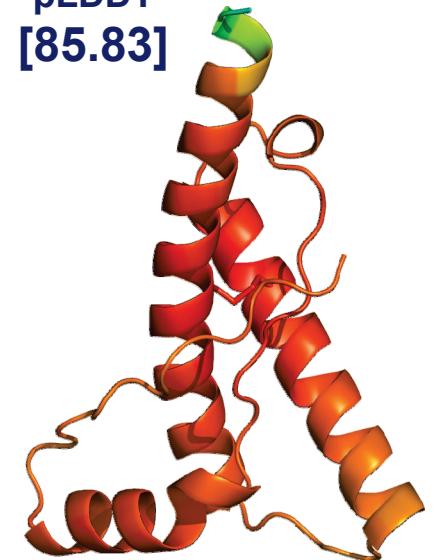

Distinct primary sequence across species

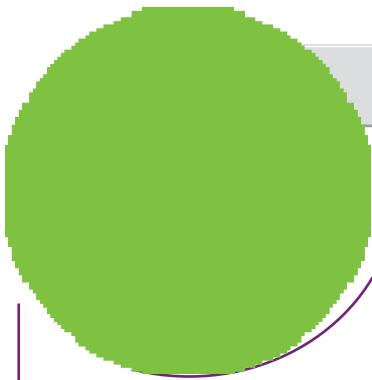

# Common bottlenose dolphin

GenBank: XM\_019941481

## *Tursiops truncatus*

Cetacea 0/14

Delphinidae 0/2

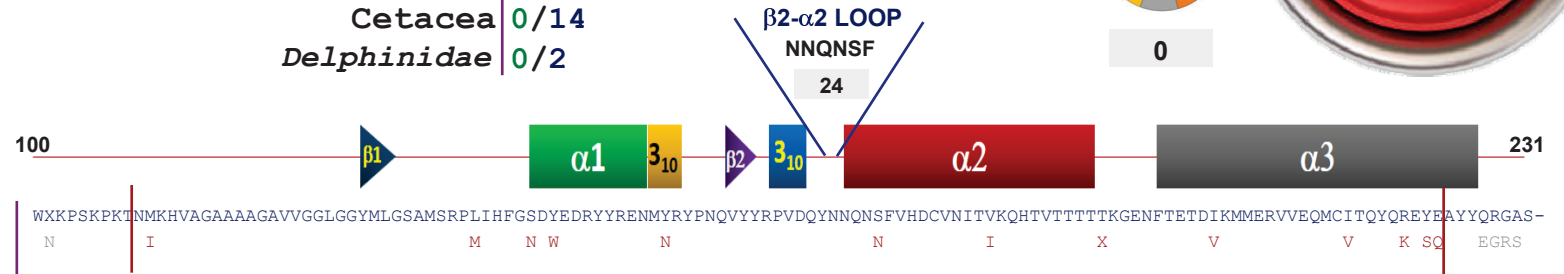

PrP sequence differs by 13 amino acids from the bank vole PrP (see in red)

No deletions  
One insertion  
It shows polymorphic variants

P29%



0



Tm<sup>Exp</sup>: 68.6 °C

ΔΔG: -19.79

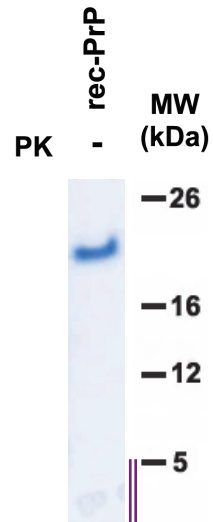

213 AA

0 Conformers

**NO MISFOLDING**

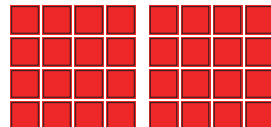

*In vitro* studies

**NOT APPLICABLE**

*In vivo* studies

**NOT APPLICABLE**

pLDDT [86.43]

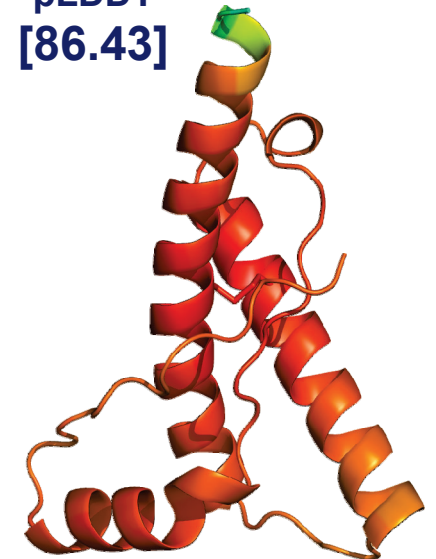

# Ziphius

GenBank: DQ884467

P29%



0

## *Ziphius cavirostris*

Cetacea 0/14  
Ziphiidae 0/4

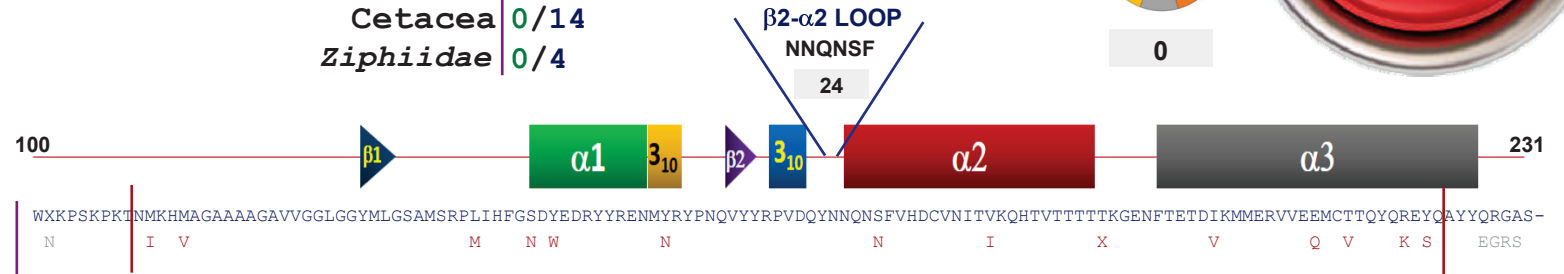

PrP sequence differs by 14 amino acids from the bank vole PrP (see in red)

No deletions  
One insertion  
No polymorphic variants found

$T_m^{Exp}$ : ND

$\Delta\Delta G$ : -21.45

Distinct primary sequence across species

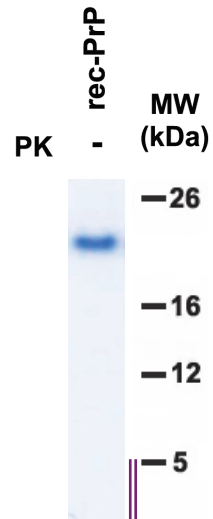

213 AA

0  
Conformers

NO  
MISFOLDING

*In vitro* studies

NOT  
APPLICABLE

*In vivo* studies

NOT  
APPLICABLE

pLDDT  
[86.92]

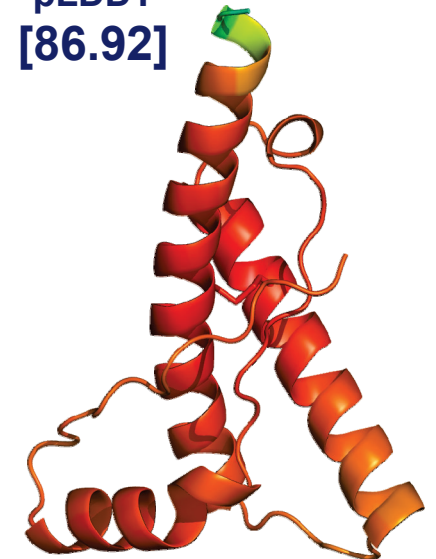

# Tailed tailless bat

GenBank: **BK064067**

P29%



0

## *Anoura caudifer*

Chiroptera 23/45

Phyllostomidae 2/10

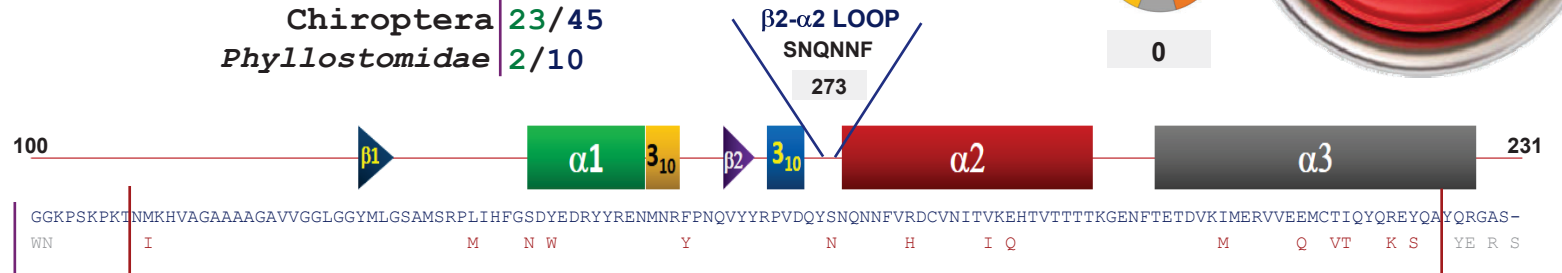

PrP sequence differs by 15 amino acids from the bank vole PrP (see in red)

- No deletions
- No insertions
- No polymorphic variants found

Tm<sup>Exp</sup>: ND

ΔΔG: ND

Distinct primary sequence across species

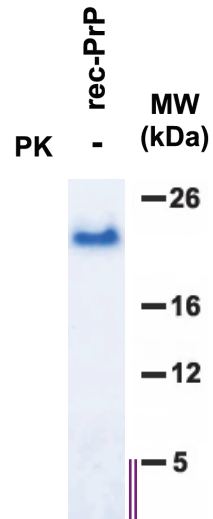

214 AA

0  
Conformers

**NO  
MISFOLDING**

*In vitro* studies

**NOT  
APPLICABLE**

*In vivo* studies

**NOT  
APPLICABLE**

pLDDT  
[87.61]

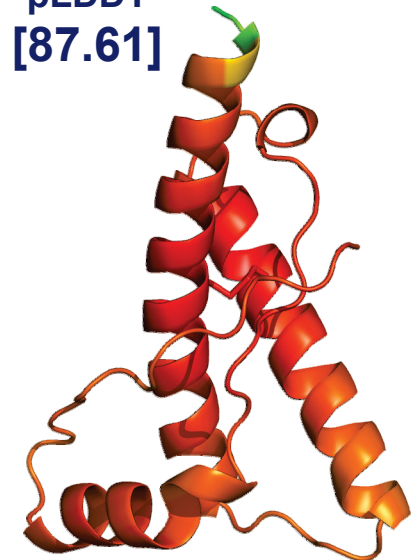

Distinct primary sequence across species

# Pallid bat

GenBank: **BK064069**

P29%



0

## *Antrozous pallidus*

Chiroptera 23/45

Vespertilionidae 7/16

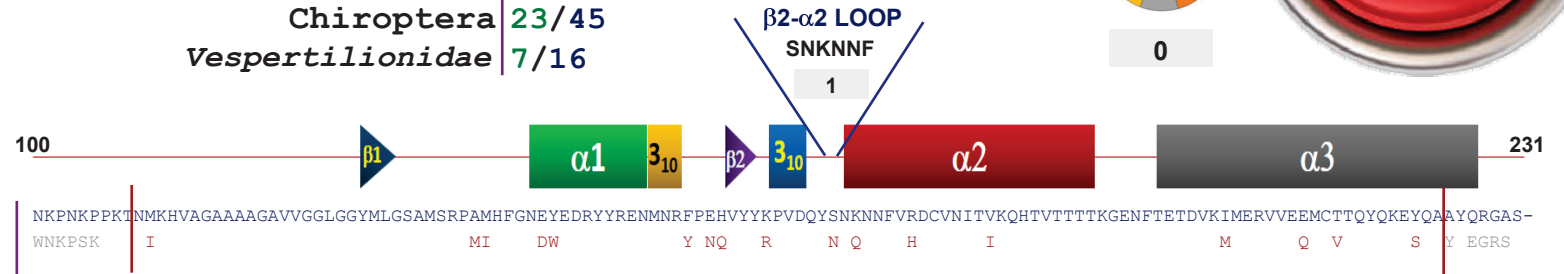

PrP sequence differs by 17 amino acids from the bank vole PrP (see in red)

- No deletions
- No insertions
- No polymorphic variants found

Tm<sup>Exp</sup>: ND

ΔΔG: -1.85

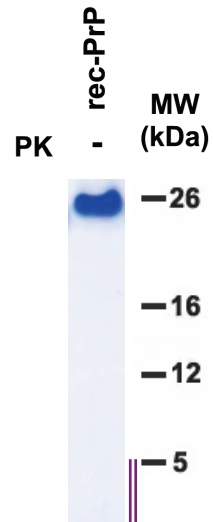

228 AA

0 Conformers

**NO MISFOLDING**

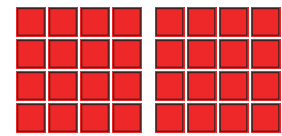

*In vitro* studies

**NOT APPLICABLE**

*In vivo* studies

**NOT APPLICABLE**

pLDDT [87.3]

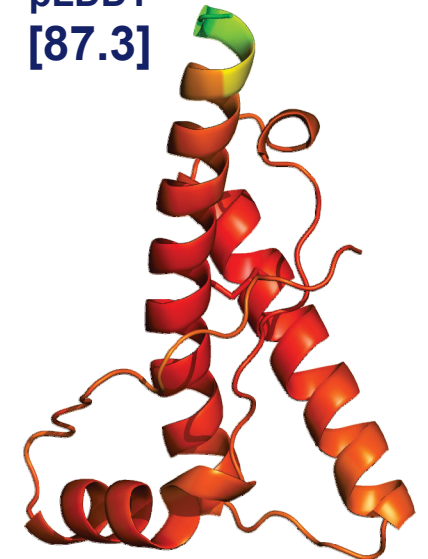

# Jamaican fruit bat

GenBank: **BK064072**

## *Artibeus jamaicensis*

Chiroptera 23/45

Phyllostomidae 2/10

P29%



0

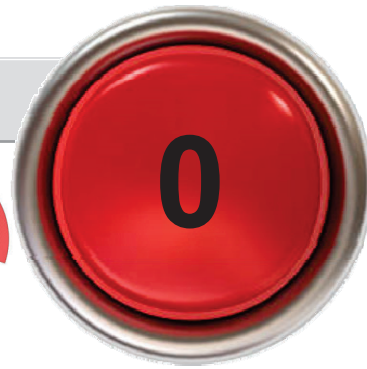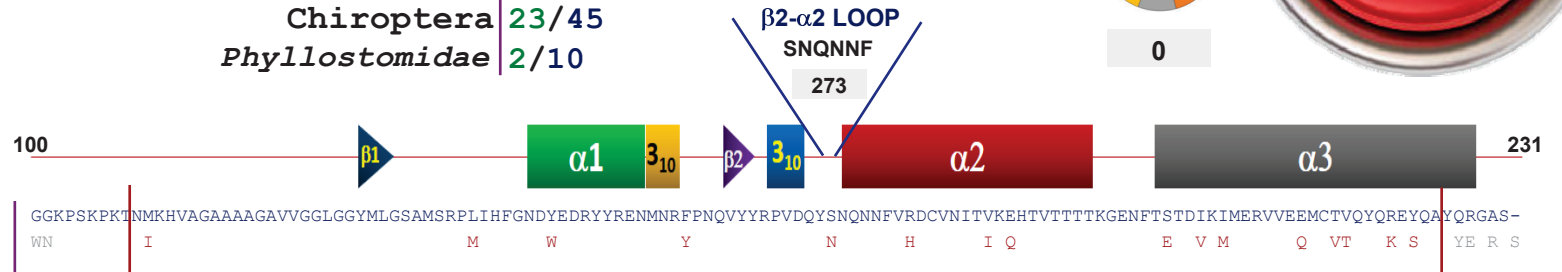

PrP sequence differs by 16 amino acids from the bank vole PrP (see in red)

No deletions  
No insertions  
No polymorphic variants found

$T_m^{Exp}$ : ND

$\Delta\Delta G$ : ND

Distinct primary sequence across species

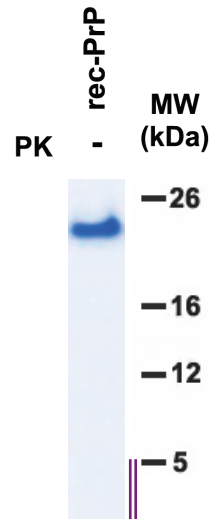

214 AA

0  
Conformers

**NO  
MISFOLDING**

*In vitro* studies

**NOT  
APPLICABLE**

*In vivo* studies

**NOT  
APPLICABLE**

pLDDT  
[86.75]

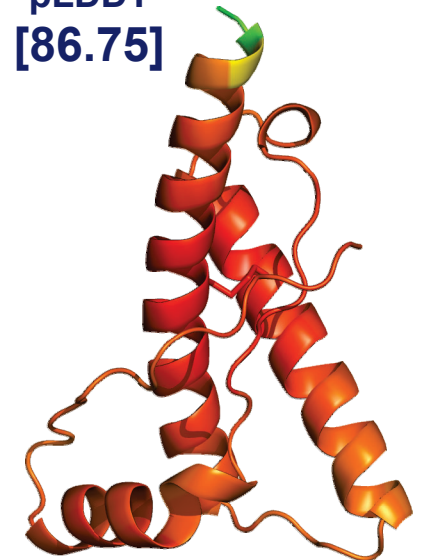



# Seba's short-tailed bat

GenBank: **BK063935**

## *Carollia perspicillata*

Chiroptera 23/45

Phyllostomidae 2/10

P29%



0

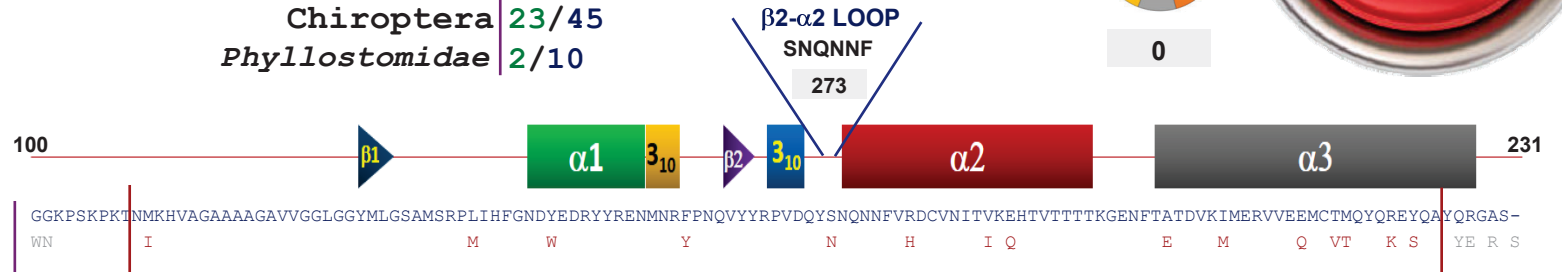

PrP sequence differs by 15 amino acids from the bank vole PrP (see in red)

- No deletions
- No insertions
- No polymorphic variants found

Tm<sup>Exp</sup>: ND

ΔΔG: ND

Distinct primary sequence across species

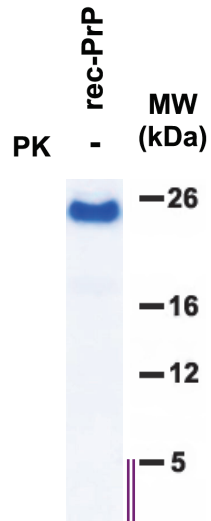

226 AA

0 Conformers

**NO MISFOLDING**

*In vitro* studies

**NOT APPLICABLE**

*In vivo* studies

**NOT APPLICABLE**

pLDDT [87.23]

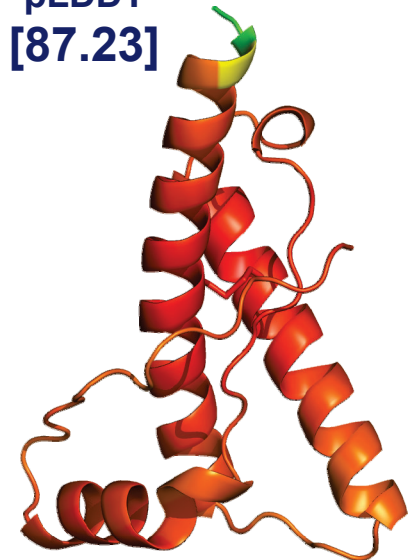

# Townsend's big-eared bat

GenBank: **BK064211**

P29%



0

## *Corynorhinus townsendii*

Chiroptera 23/45

Vespertilionidae 7/16

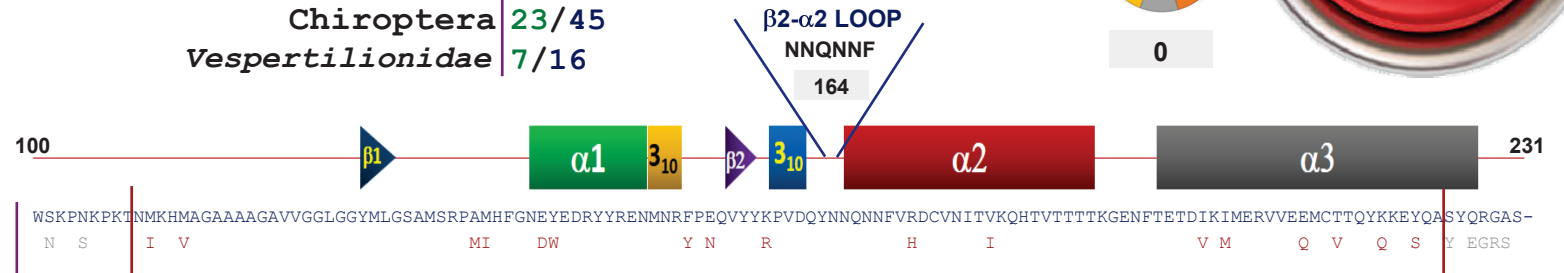

PrP sequence differs by 17 amino acids from the bank vole PrP (see in red)

- No deletions
- No insertions
- No polymorphic variants found

Tm<sup>Exp</sup>: ND

ΔΔG: -17.27

Distinct primary sequence across species

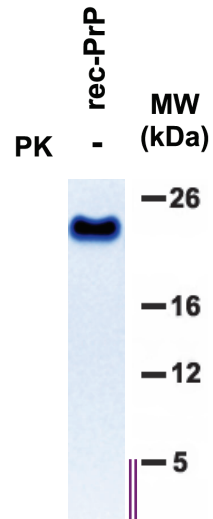

218 AA

0  
Conformers

**NO MISFOLDING**

*In vitro* studies

**NOT APPLICABLE**

*In vivo* studies

**NOT APPLICABLE**

pLDDT [91.52]

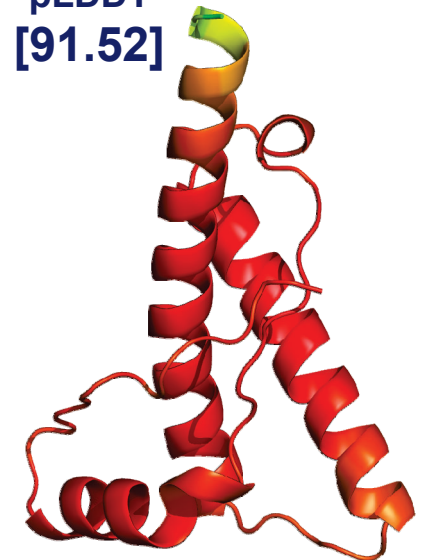

# Kitti's hog-nosed bat

GenBank: **BK063940**

P46%

10.7

## *Craseonycteris thonglongyai*

Chiroptera 23/45

*Craseonycteridae* 1/1

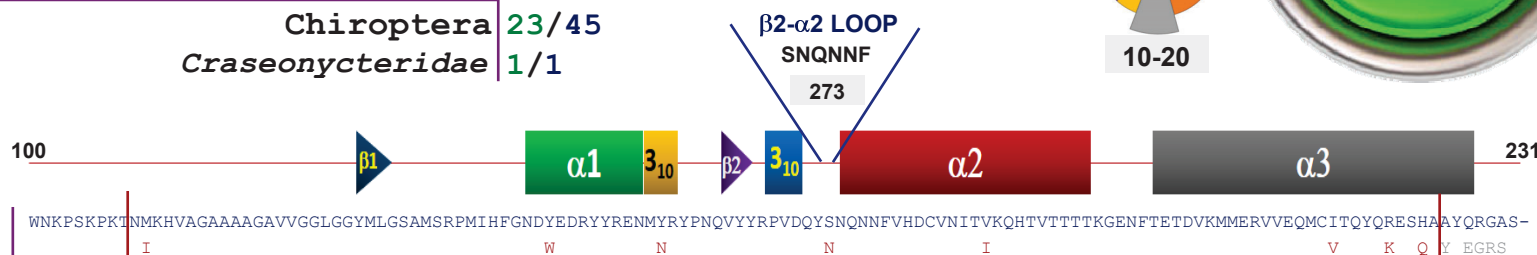

PrP sequence differs by 8 amino acids from the bank vole PrP (see in red)

No deletions  
No insertions  
No polymorphic variants found

Distinct primary sequence across species

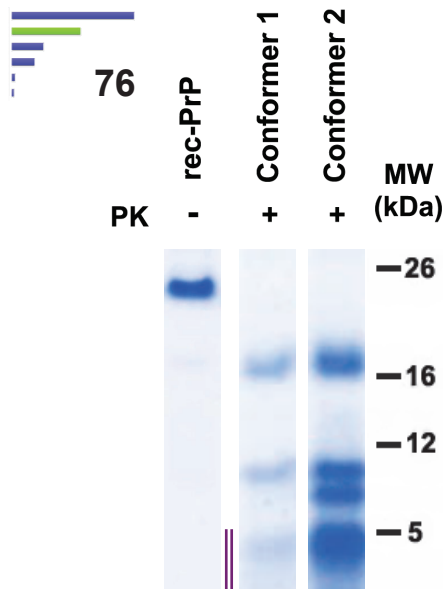

221 AA

2  
Conformers

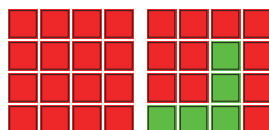

Tm<sup>Exp</sup>: ND

ΔΔG: -6.77

### *In vitro* studies

TgVole (1x) Not tested

Kitti's hog-nosed bat Not tested

### *In vivo* studies

TgVole (1x) Not tested

Kitti's hog-nosed bat Not tested

pLDDT  
[85.36]

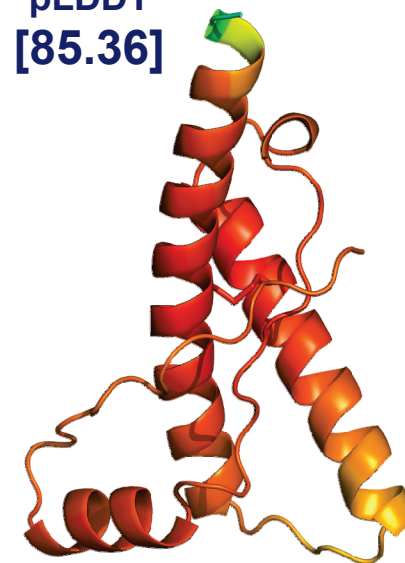

# Indian short-nosed fruit bat

GenBank: AY133046

P89%

87.5



80-90

## *Cynopterus sphinx*

Chiroptera 23/45

Pteropodidae 8/8

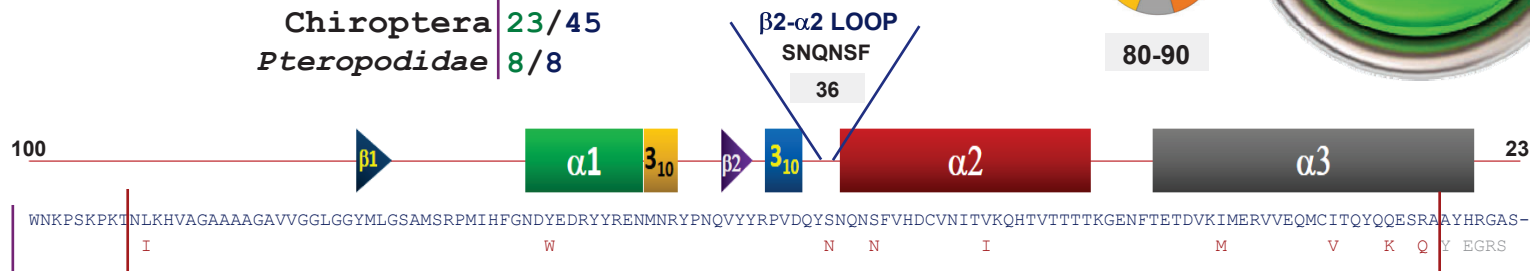

PrP sequence differs by 9 amino acids from the bank vole PrP (see in red)

- No deletions
- No insertions
- No polymorphic variants found

1 species sharing the same primary sequence

Lesser short-nosed fruit bat  
*Cynopterus brachyotis*

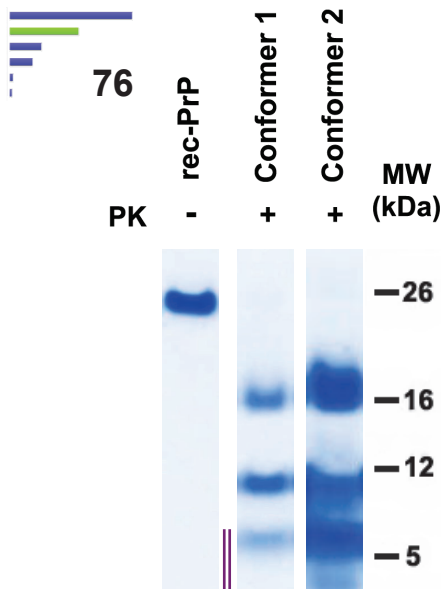

213 AA

2 Conformers

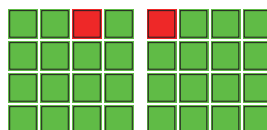

Tm<sup>Exp</sup>: ND

ΔΔG: -7.08

### In vitro studies

TgVole (1x) Not tested

Indian short-nosed fruit bat Not tested

### In vivo studies

TgVole (1x) Not tested

Indian short-nosed fruit bat Not tested

pLDDT [84.43]

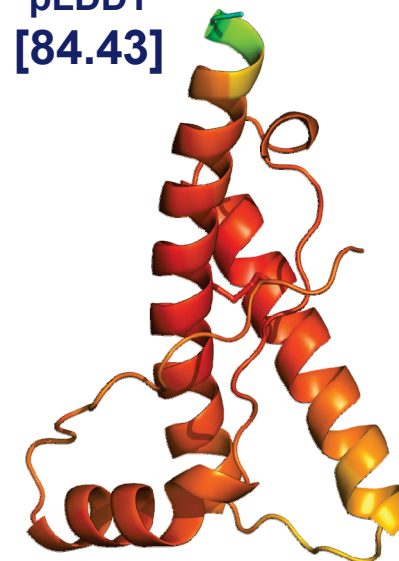

# Common vampire bat

GenBank: **BK064947**

P31%

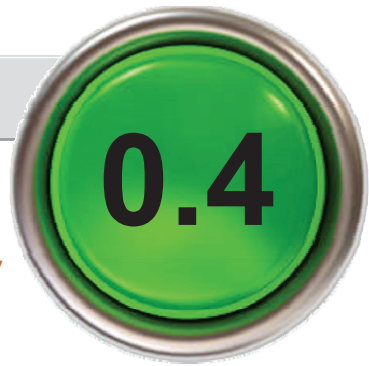

0-10

## *Desmodus rotundus*

Chiroptera 23/45

Phyllostomidae 2/10

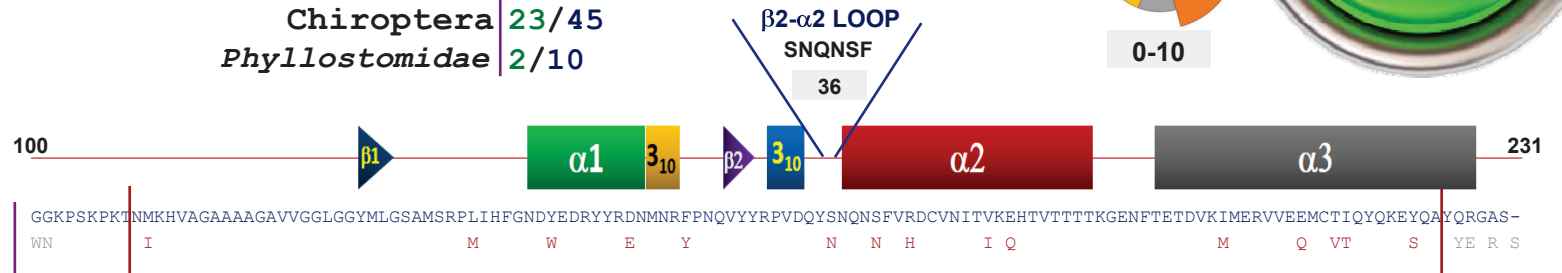

PrP sequence differs by 15 amino acids from the bank vole PrP (see in red)

- No deletions
- No insertions
- No polymorphic variants found

Distinct primary sequence across species

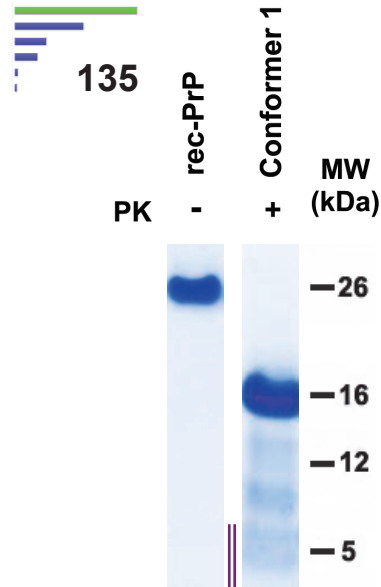

216 AA

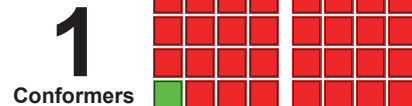

Tm<sup>Exp</sup>: ND

ΔΔG: ND

### *In vitro* studies

TgVole (1x) Not tested

Common vampire bat Not tested

### *In vivo* studies

TgVole (1x) Not tested

Common vampire bat Not tested

pLDDT [85.91]

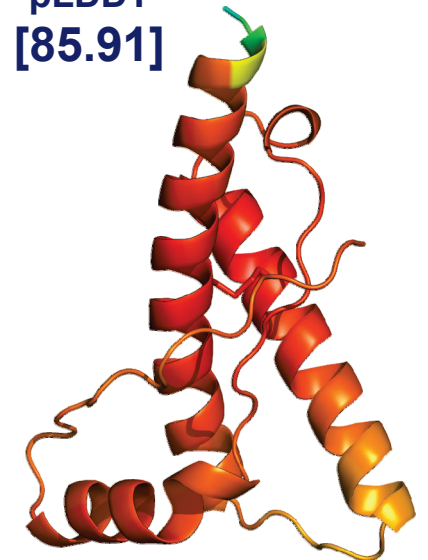

# Straw-coloured fruit bat

GenBank: **BK064039**

P86%

82.1



80-90

## *Eidolon helvum*

Chiroptera 23/45

Pteropodidae 8/8

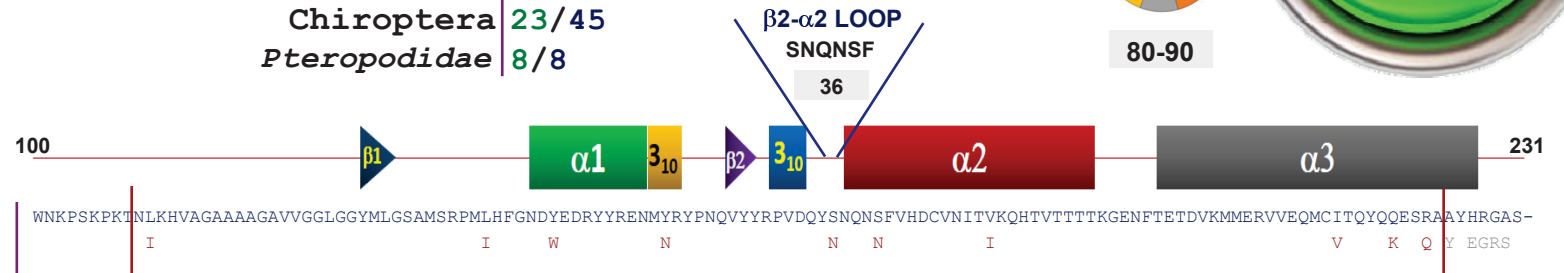

PrP sequence differs by 10 amino acids from the bank vole PrP (see in red)

- No deletions
- No insertions
- No polymorphic variants found

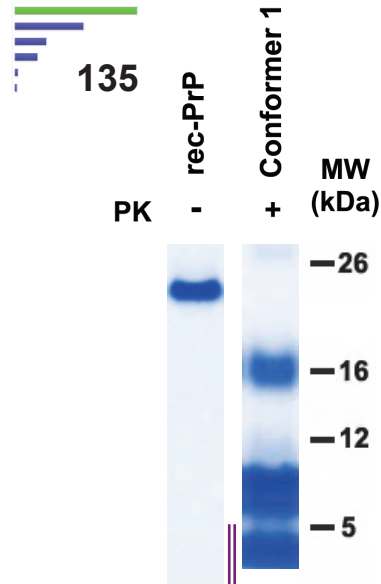

220 AA

1  
Conformers

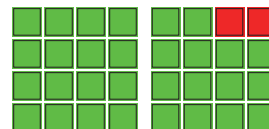

Tm<sup>Exp</sup>: ND

ΔΔG: -16.93

### In vitro studies

TgVole (1x) Not tested

Straw-coloured fruit bat Not tested

### In vivo studies

TgVole (1x) Not tested

Straw-coloured fruit bat Not tested

pLDDT [85.84]

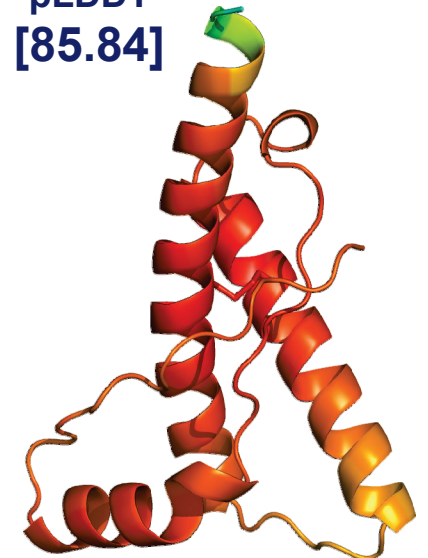

1 species sharing the same primary sequence

Madagascan fruit bat  
*Eidolon dupreanum*

# Cave nectar bat

GenBank: **BK064041**

P56%

21.4

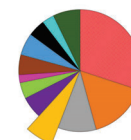

20-30

## *Eonycteris spelaea*

Chiroptera 23/45

Pteropodidae 8/8

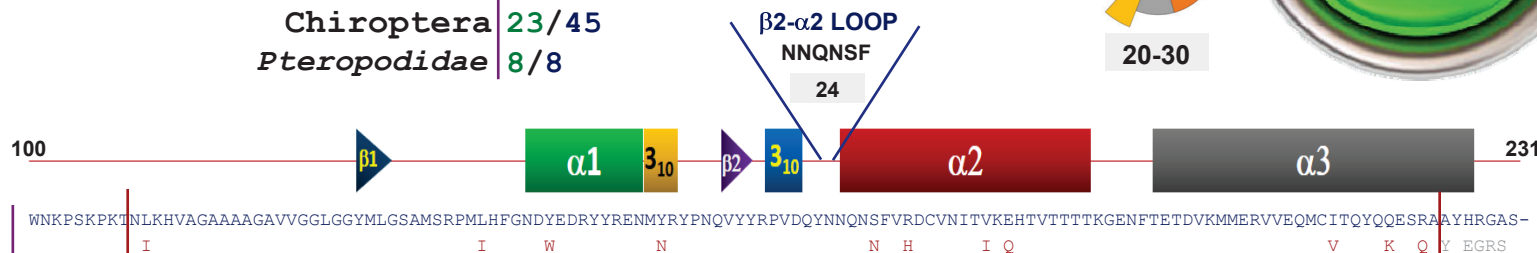

PrP sequence differs by 11 amino acids from the bank vole PrP (see in red)

- No deletions
- No insertions
- No polymorphic variants found

Distinct primary sequence across species

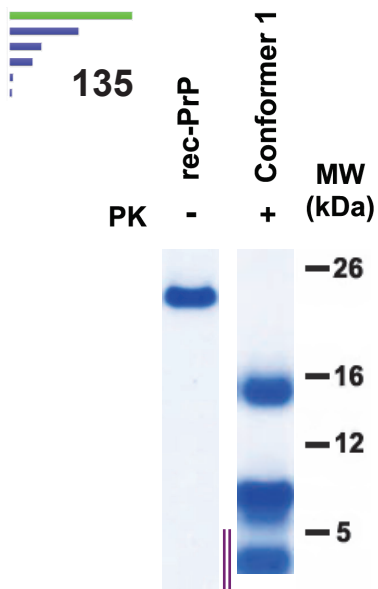

219 AA

1  
Conformers

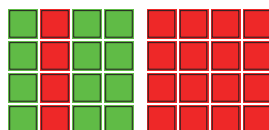

Tm<sup>Exp</sup>: ND

ΔΔG: -13.08

### *In vitro* studies

TgVole (1x) Not tested

Cave nectar bat Not tested

### *In vivo* studies

TgVole (1x) Not tested

Cave nectar bat Not tested

pLDDT  
[85.61]

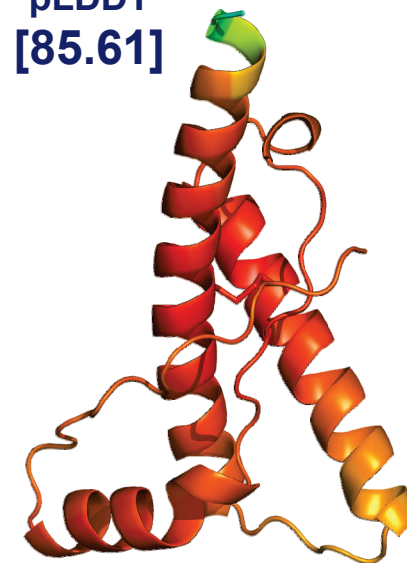

# Big brown bat

GenBank: **BK064945**

P31%



0-10

## *Eptesicus fuscus*

Chiroptera 23/45

Vespertilionidae 7/16

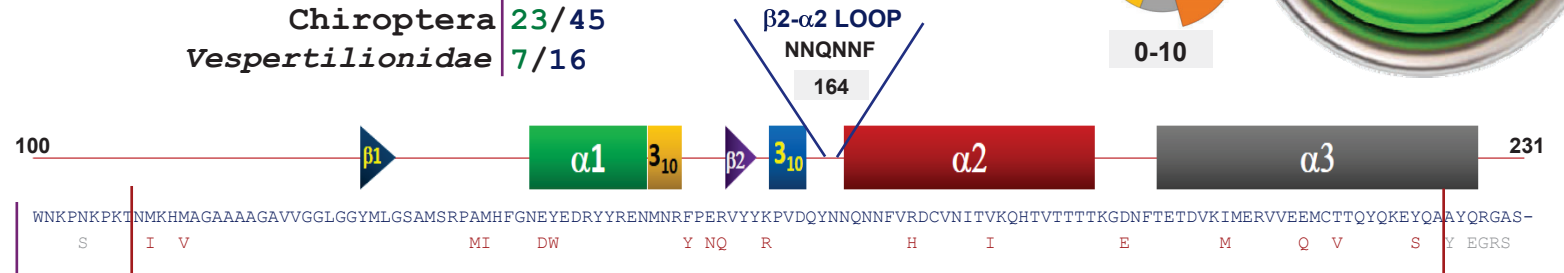

PrP sequence differs by 17 amino acids from the bank vole PrP (see in red)

- No deletions
- No insertions
- No polymorphic variants found

Distinct primary sequence across species

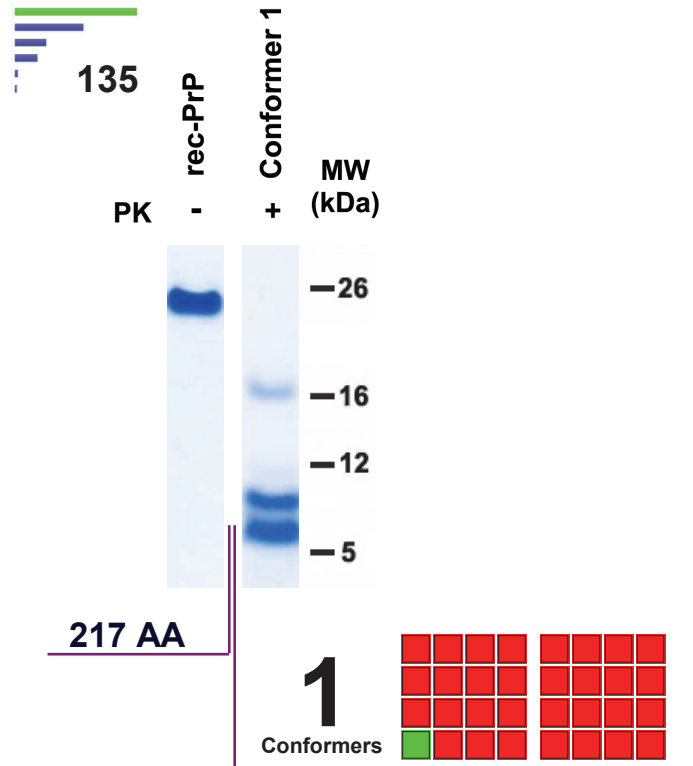

Tm<sup>Exp</sup>: ND

ΔΔG: -0.01

### *In vitro* studies

TgVole (1x) Not tested

Big brown bat Not tested

### *In vivo* studies

TgVole (1x) Not tested

Big brown bat Not tested

pLDDT [86.88]

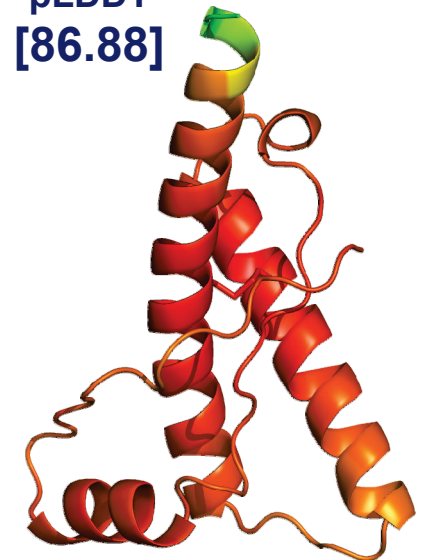



# Great roundleaf bat

GenBank: XM\_019644637

P86%

82.1



80-90

## *Hipposideros armiger*

Chiroptera 23/45

Hipposideridae 2/2

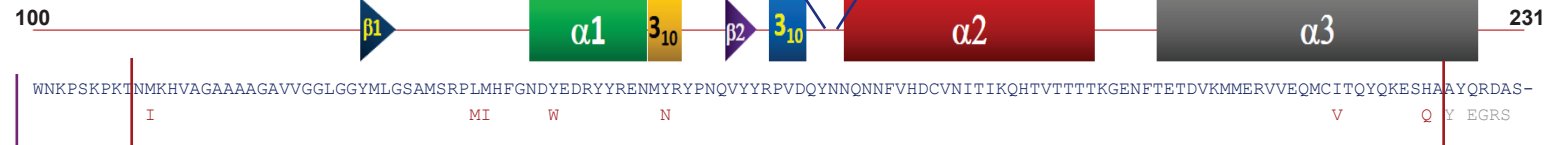

PrP sequence differs by 7 amino acids from the bank vole PrP (see in red)

- No deletions
- No insertions
- No polymorphic variants found

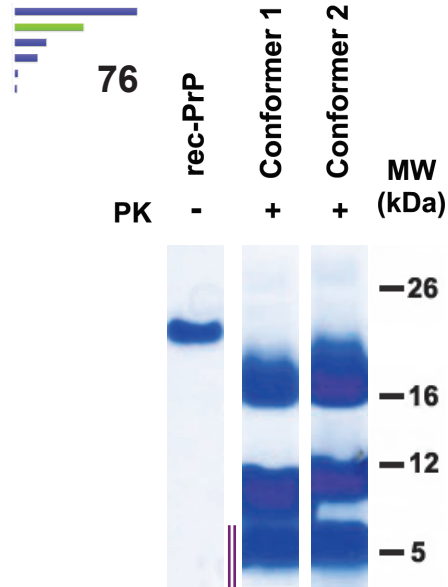

203 AA

2 Conformers

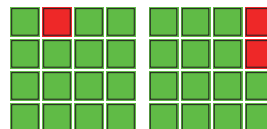

Tm<sup>Exp</sup>: ND

ΔΔG: -2.36

### In vitro studies

TgVole (1x) Not tested

Great roundleaf bat Not tested

### In vivo studies

TgVole (1x) Not tested

Great roundleaf bat Not tested

pLDDT [89.32]

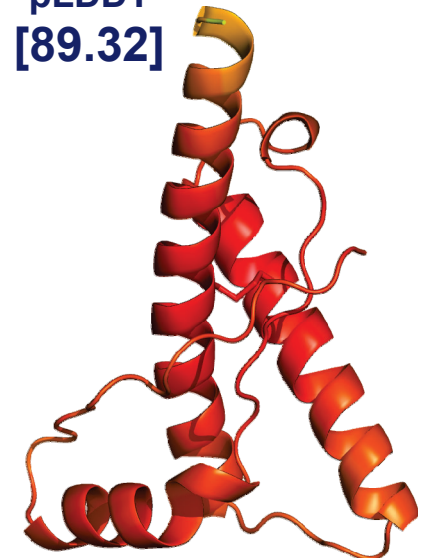

1 species sharing the same primary sequence

Pendlebury's roundleaf bat  
*Hipposideros turpis pendleburyi*

# Cantor's roundleaf bat

GenBank: **BK064054**

P65%

**35.9**



30-40

## *Hipposideros galeritus*

Chiroptera 23/45

Hipposideridae 2/2

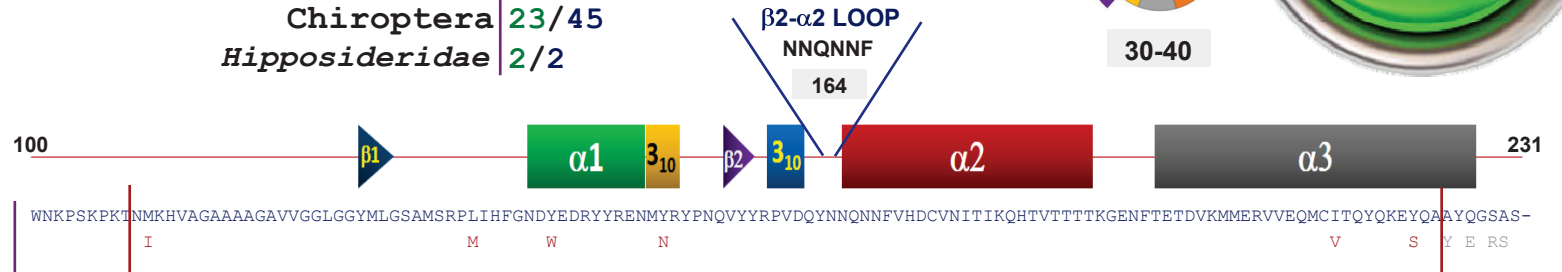

PrP sequence differs by 6 amino acids from the bank vole PrP (see in red)

- No deletions
- No insertions
- No polymorphic variants found

Distinct primary sequence across species

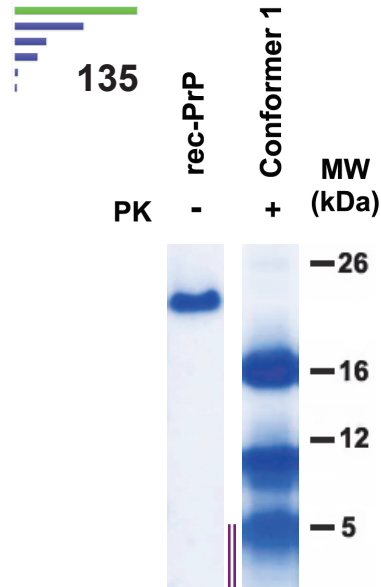

211 AA

**1**  
Conformers

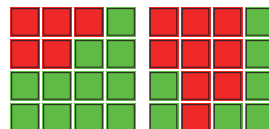

Tm<sup>Exp</sup>: ND

ΔΔG: **-8.51**

### *In vitro* studies

- TgVole (1x) Not tested
- Cantor's roundleaf bat Not tested

### *In vivo* studies

- TgVole (1x) Not tested
- Cantor's roundleaf bat Not tested

pLDDT  
**[84.25]**

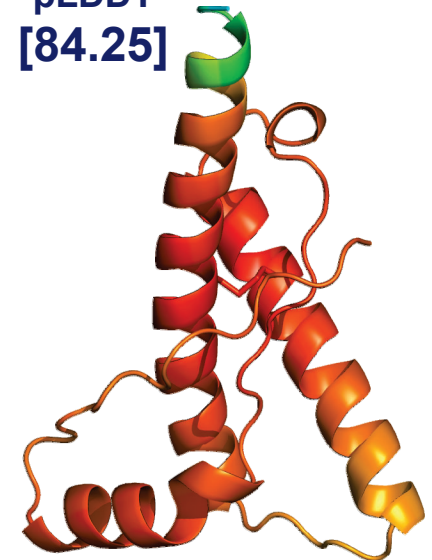

# Great evening bat

GenBank: **BK064208**

P29%



0

Distinct primary sequence across species

*la io*  
Chiroptera 23/45  
Vespertilionidae 7/16

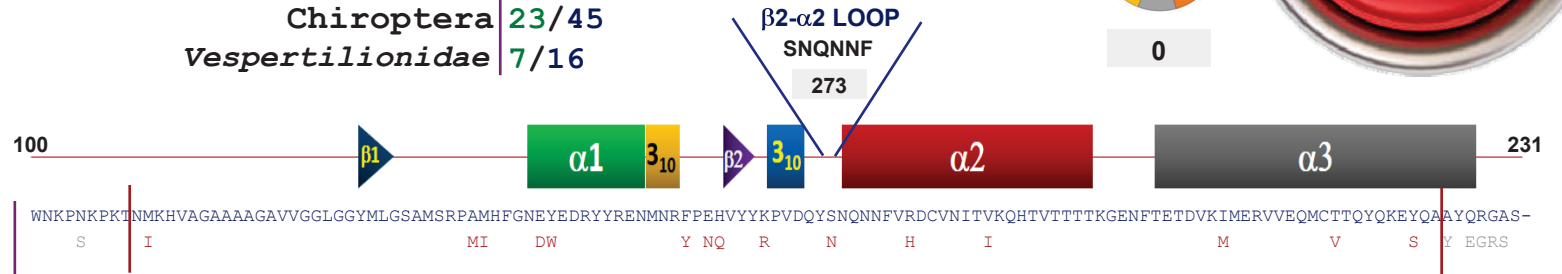

PrP sequence differs by 15 amino acids from the bank vole PrP (see in red)

- No deletions
- No insertions
- No polymorphic variants found

Tm<sup>Exp</sup>: ND

ΔΔG: -13.71

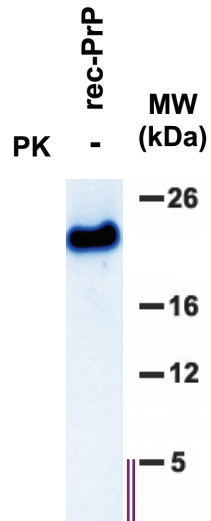

218 AA

0  
Conformers

**NO  
MISFOLDING**

*In vitro* studies

**NOT  
APPLICABLE**

*In vivo* studies

**NOT  
APPLICABLE**

pLDDT  
[92.15]

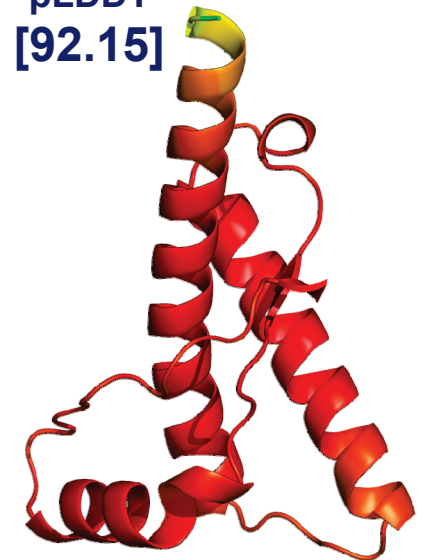

# Hoary bat

GenBank: **BK063928**

P39%

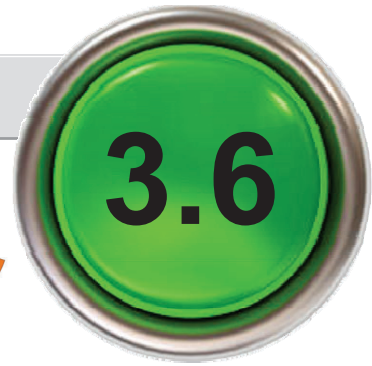

0-10

## *Lasiurus cinereus*

Chiroptera 23/45

Vespertilionidae 7/16

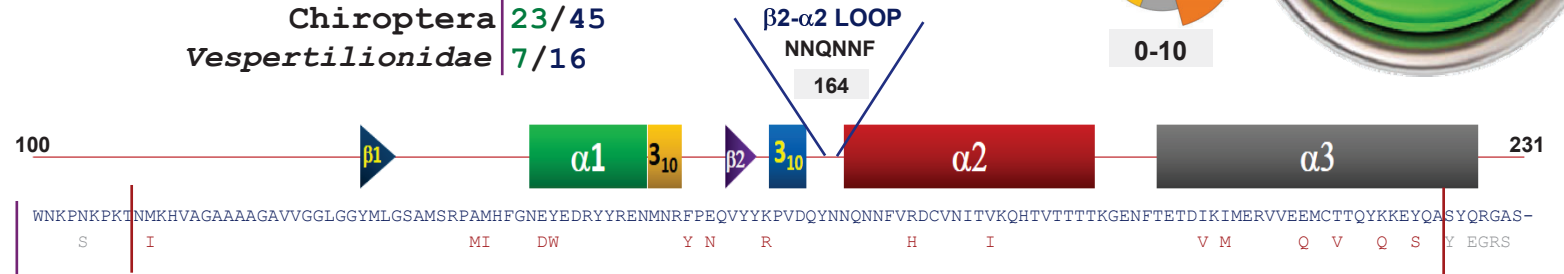

PrP sequence differs by 16 amino acids from the bank vole PrP (see in red)

- No deletions
- No insertions
- No polymorphic variants found

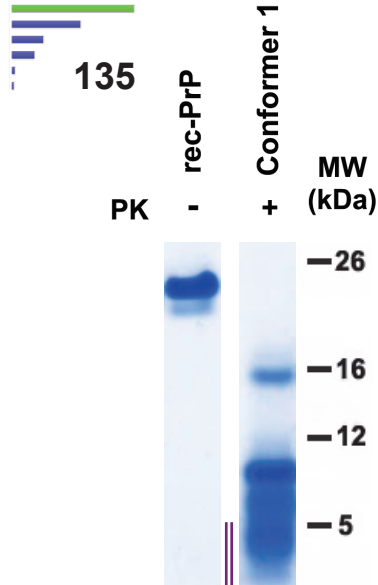

224 AA

1  
Conformers

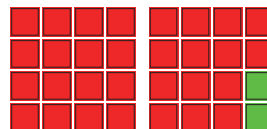

Tm<sup>Exp</sup>: ND

ΔΔG: -4.45

### *In vitro* studies

TgVole (1x) Not tested

Hoary bat Not tested

### *In vivo* studies

TgVole (1x) Not tested

Hoary bat Not tested

pLDDT  
[85.37]

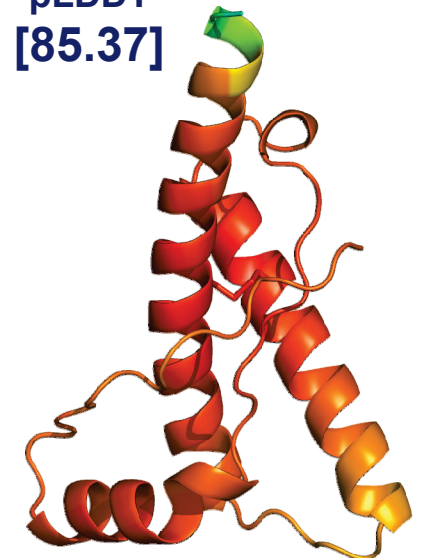

2 species sharing the same primary sequence

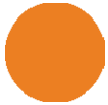

Rafinesque's big-eared bat  
*Corynorhinus rafinesquii*

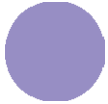

Eastern red bat  
*Lasiurus borealis*

# Long-tongued fruit bat

GenBank: **BK063991**

P86%

82.1



80-90

## Macroglossus sobrinus

Chiroptera 23/45  
Pteropodidae 8/8

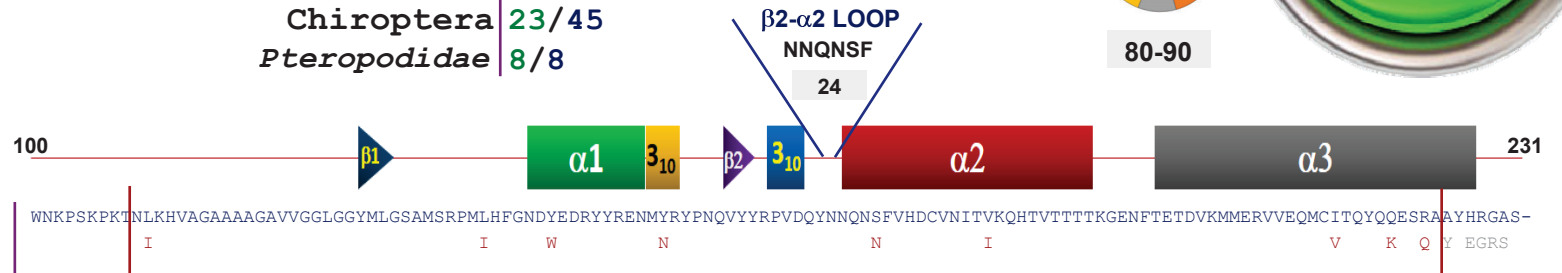

PrP sequence differs by 9 amino acids from the bank vole PrP (see in red)

No deletions  
No insertions  
No polymorphic variants found

Distinct primary sequence across species

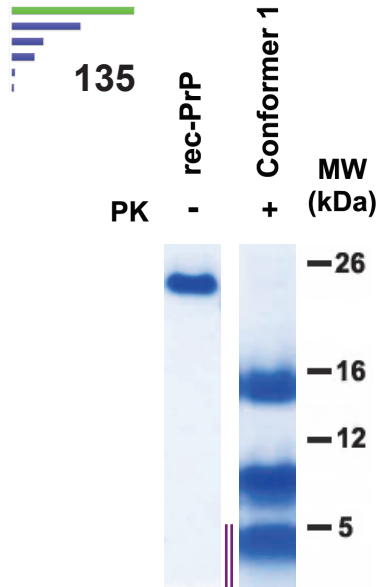

220 AA

1  
Conformers

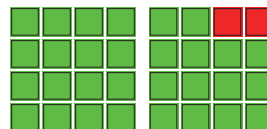

Tm<sup>Exp</sup>: ND

ΔΔG: -14.88

### In vitro studies

TgVole (1x) Not tested  
Long-tongued fruit bat Not tested

### In vivo studies

TgVole (1x) Not tested  
Long-tongued fruit bat Not tested

pLDDT [85.45]

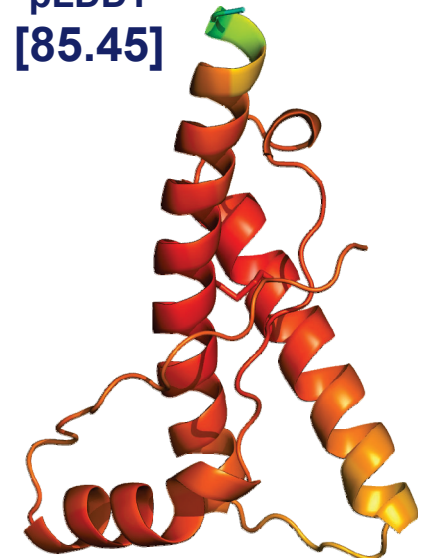

# California leaf-nosed bat

GenBank: AY133049

P35%

1.4



0-10

## Macrotus californicus

Chiroptera 23/45

Phyllostomidae 2/10

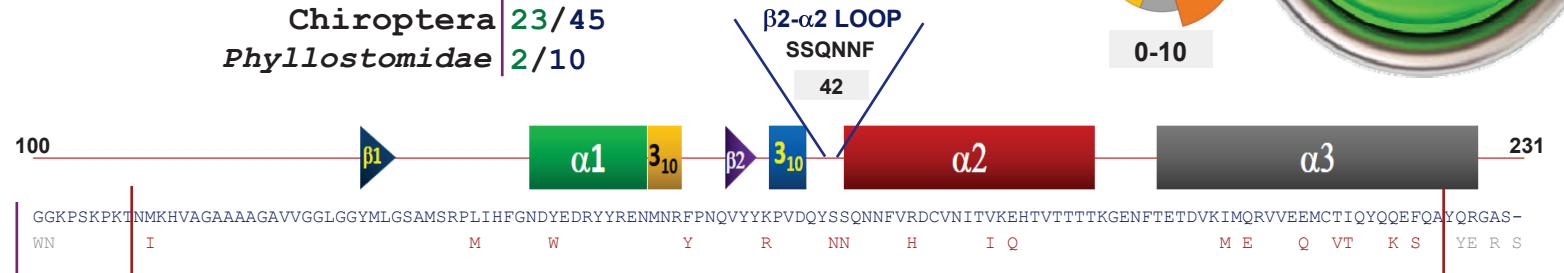

PrP sequence differs by 17 amino acids from the bank vole PrP (see in red)

No deletions  
No insertions  
No polymorphic variants found

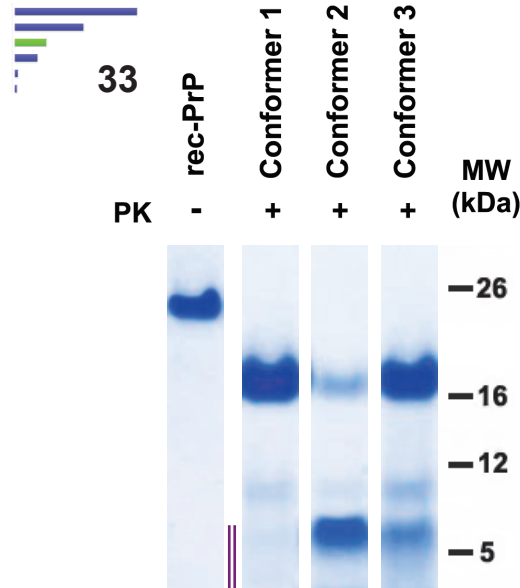

215 AA

3  
Conformers

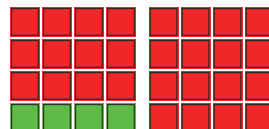

$T_m^{Exp}$ : ND

$\Delta\Delta G$ : ND

### In vitro studies

TgVole (1x) Not tested

California leaf-nosed bat Not tested

### In vivo studies

TgVole (1x) Not tested

California leaf-nosed bat Not tested

pLDDT  
[87.91]

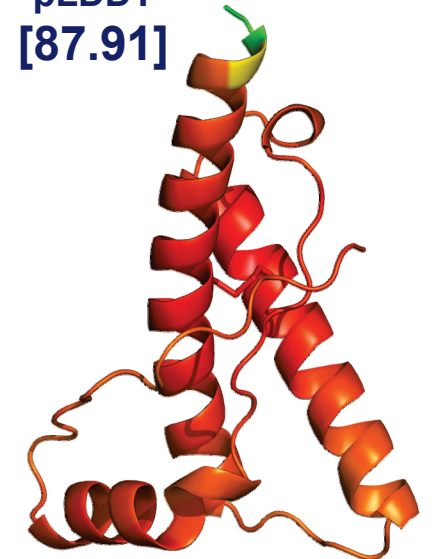

Distinct primary sequence across species

Distinct primary sequence across species

# Greater false vampire bat

GenBank: **BK064080**

P29%



0

## Megaderma lyra

Chiroptera 23/45

Megadermatidae 0/1

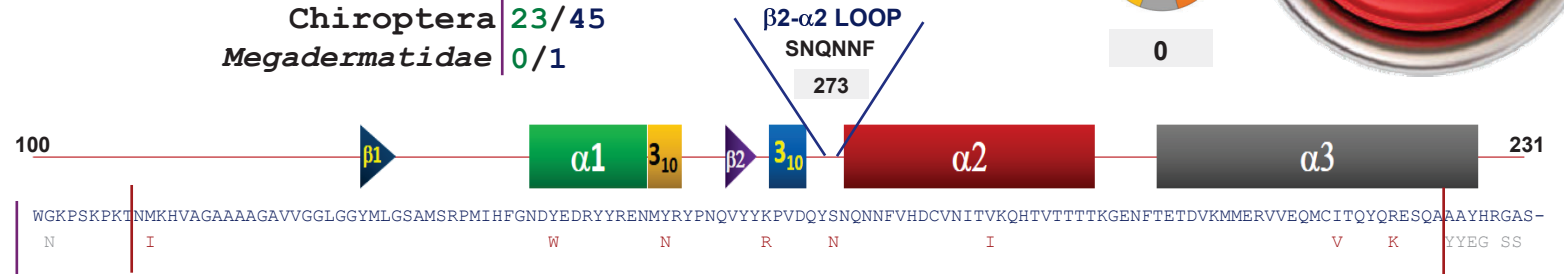

PrP sequence differs by 8 amino acids from the bank vole PrP (see in red)

- No deletions
- No insertions
- No polymorphic variants found

T<sub>m</sub><sup>Exp</sup>: ND

ΔΔG: ND

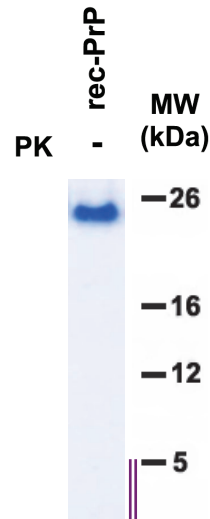

222 AA

0 Conformers

**NO MISFOLDING**

*In vitro* studies

**NOT APPLICABLE**

*In vivo* studies

**NOT APPLICABLE**

pLDDT [86.06]

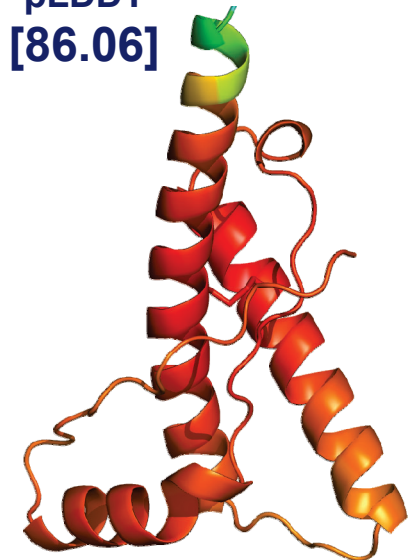

# Hairy big-eared bat

GenBank: **BK064088**

P29%



0

## *Micronycteris hirsuta*

Chiroptera 23/45

Phyllostomidae 2/10

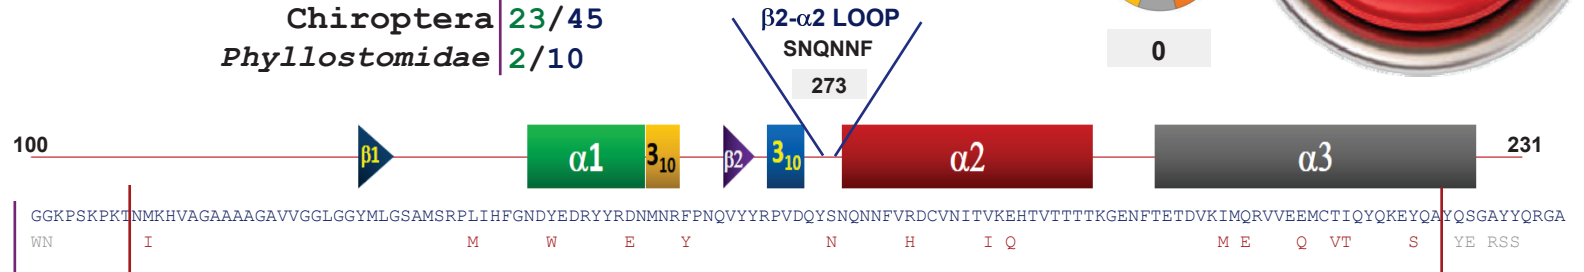

PrP sequence differs by 15 amino acids from the bank vole PrP (see in red)

- No deletions
- No insertions
- No polymorphic variants found

Tm<sup>Exp</sup>: ND

$\Delta\Delta G$ : ND

Distinct primary sequence across species

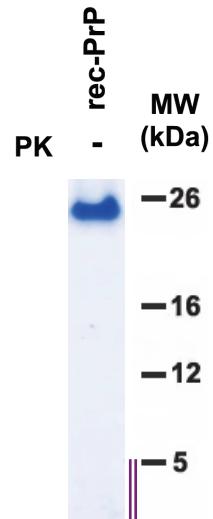

229 AA

0  
Conformers

NO  
MISFOLDING

*In vitro* studies

NOT  
APPLICABLE

*In vivo* studies

NOT  
APPLICABLE

pLDDT  
[86.43]

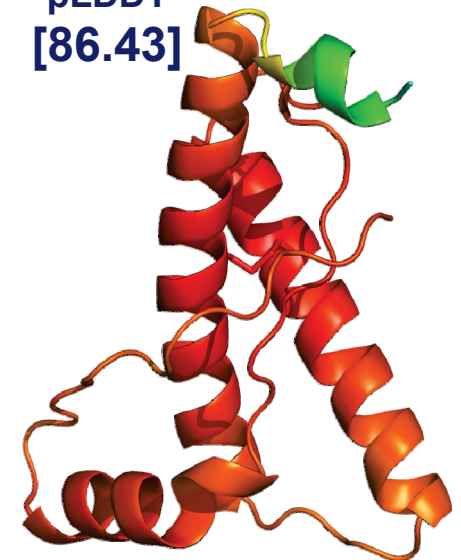



# Natal long-fingered bat

GenBank: XM\_016212061

P72%

50.7

## *Miniopterus natalensis*

Chiroptera 23/45

Vespertilionidae 7/16

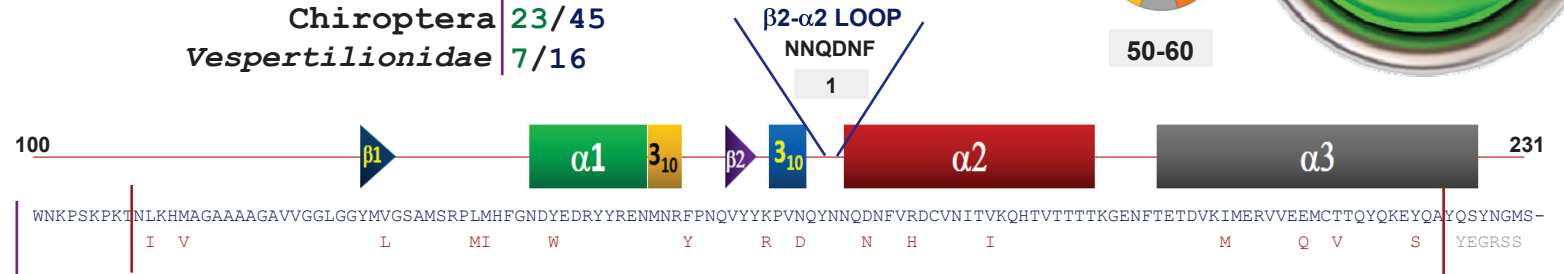

PrP sequence differs by 16 amino acids from the bank vole PrP (see in red)

No deletions  
No insertions  
No polymorphic variants found

Distinct primary sequence across species

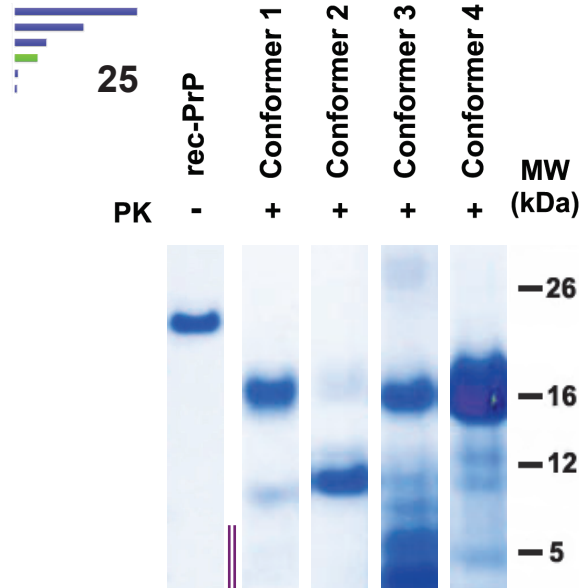

207 AA

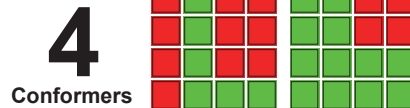

Tm<sup>Exp</sup>: ND  
ΔΔG: ND

### *In vitro* studies

TgVole (1x) Not tested  
Natal long-fingered bat Not tested

### *In vivo* studies

TgVole (1x) Not tested  
Natal long-fingered bat Not tested

pLDDT [92.25]

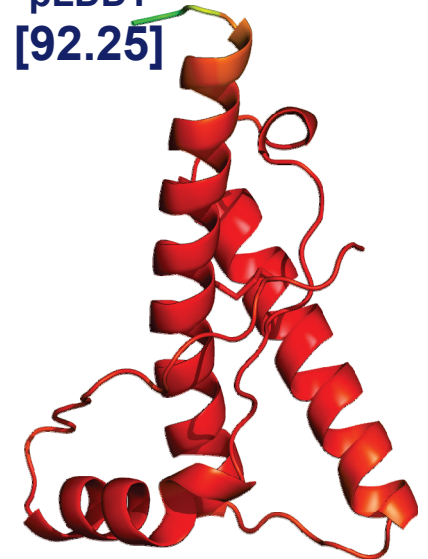

Distinct primary sequence across species

# Common bent-wing bat

GenBank: [BK064092](#)

P29%



0



## *Miniopterus schreibersii*

Chiroptera 23/45

Vespertilionidae 7/16

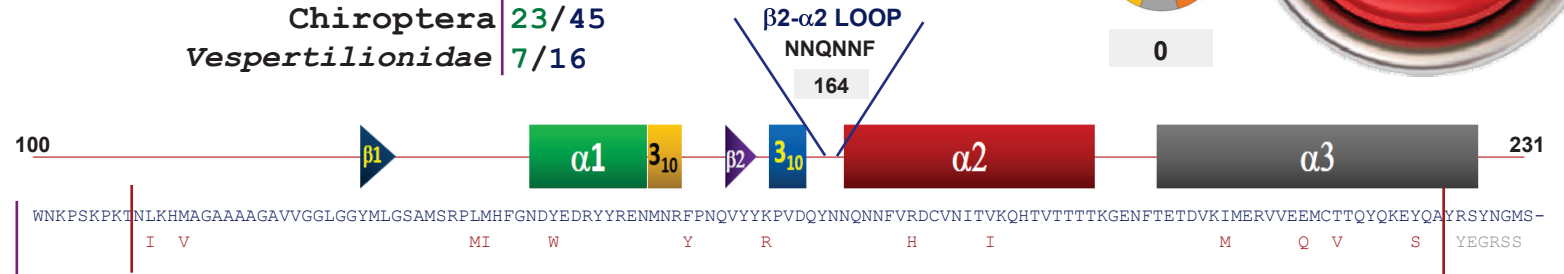

PrP sequence differs by 13 amino acids from the bank vole PrP (see in red)

- No deletions
- No insertions
- No polymorphic variants found

T<sub>m</sub><sup>Exp</sup>: ND

ΔΔG: ND

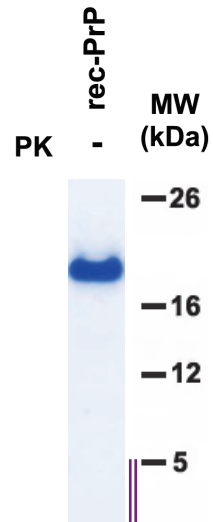

207 AA

0 Conformers



*In vitro* studies

NOT APPLICABLE

*In vivo* studies

NOT APPLICABLE

pLDDT [92.8]

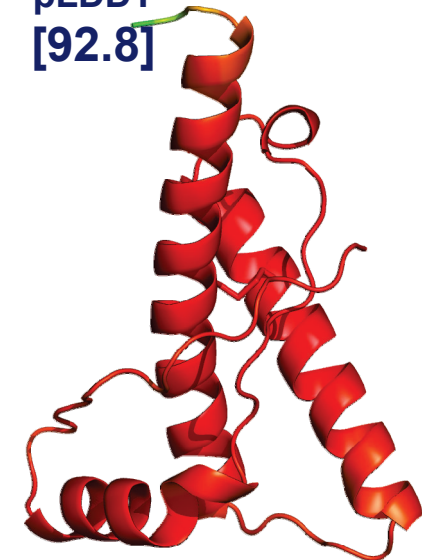

# Velvety free-tailed bat

GenBank: KAF6472180

P55%

21.1



20-30

## *Molossus molossus*

Chiroptera 23/45  
 Molossidae 2/2

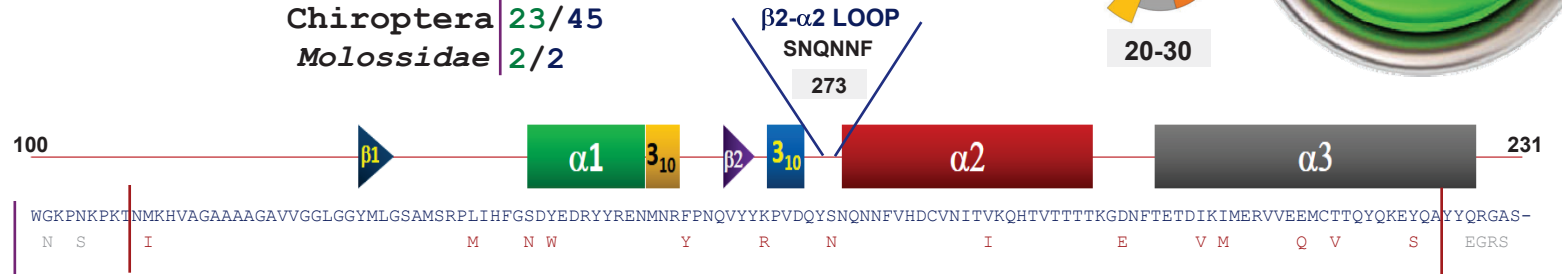

PrP sequence differs by 14 amino acids from the bank vole PrP (see in red)

No deletions  
 No insertions  
 No polymorphic variants found

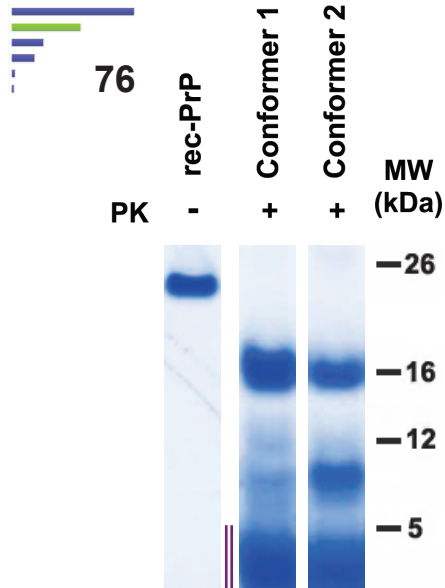

225 AA

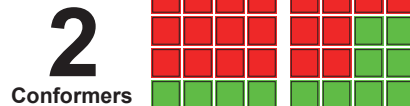

Tm<sup>Exp</sup>: ND

ΔΔG: -7.17

### *In vitro* studies

TgVole (1x) Not tested  
 Velvety free-tailed bat Not tested

### *In vivo* studies

TgVole (1x) Not tested  
 Velvety free-tailed bat Not tested

pLDDT [85.78]

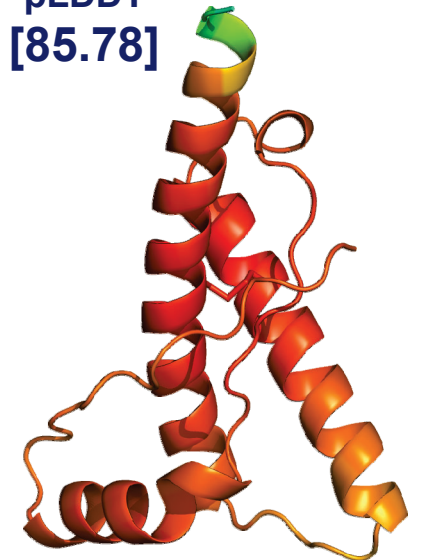

2 species sharing the same primary sequence

Alvarez's mastiff bat  
*Molossus alvarezii*

Northern black mastiff bat  
*Molossus rufus*

Distinct primary sequence across species

# Antillean ghost-faced bat

GenBank: **BK063931**

P29%



0

## *Mormoops blainvillei*

Chiroptera 23/45  
 Mormoopidae 0/2

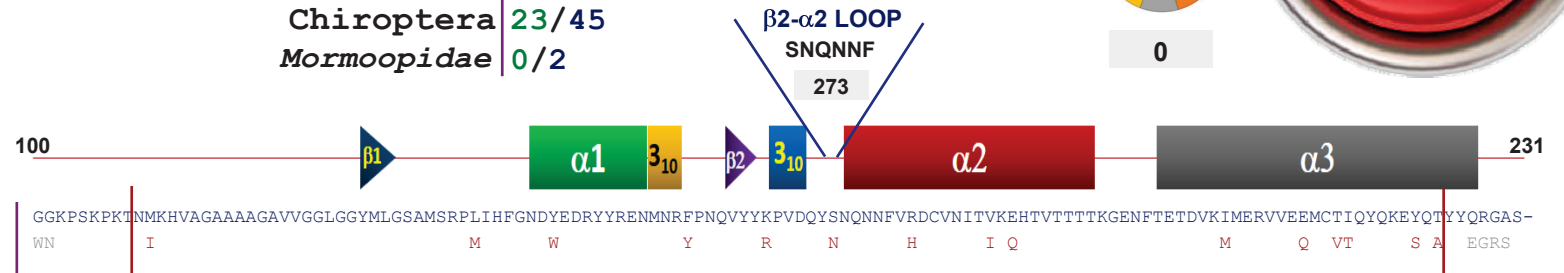

PrP sequence differs by 15 amino acids from the bank vole PrP (see in red)

- No deletions
- No insertions
- No polymorphic variants found

Tm<sup>Exp</sup>: ND

ΔΔG: -14.83

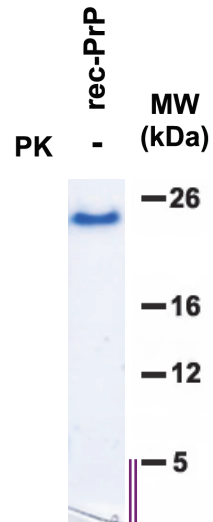

227 AA

0 Conformers

**NO MISFOLDING**

*In vitro* studies

**NOT APPLICABLE**

*In vivo* studies

**NOT APPLICABLE**

pLDDT [85.66]

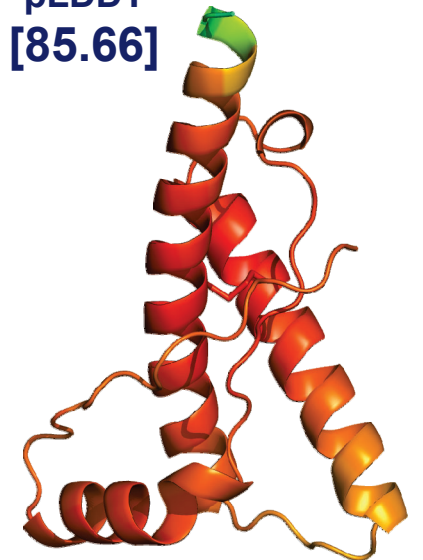

# Little tube-nosed bat

GenBank: **BK064100**

P29%



0

*Murina aurata feae*

Chiroptera 23/45

Vespertilionidae 7/16

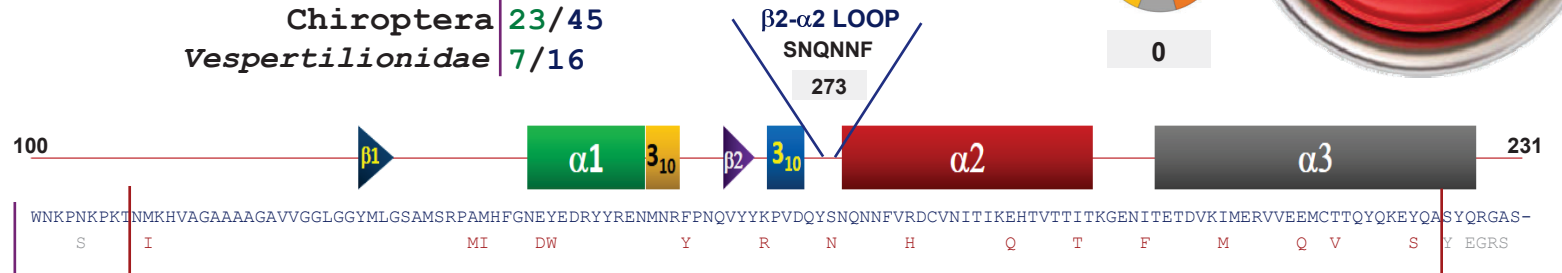

PrP sequence differs by 16 amino acids from the bank vole PrP (see in red)

- No deletions
- No insertions
- No polymorphic variants found

Tm<sup>Exp</sup>: ND

ΔΔG: -7.85

Distinct primary sequence across species

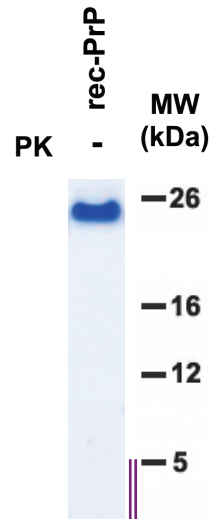

224 AA

0  
Conformers

**NO  
MISFOLDING**

*In vitro* studies

**NOT  
APPLICABLE**

*In vivo* studies

**NOT  
APPLICABLE**

pLDDT  
[86.31]

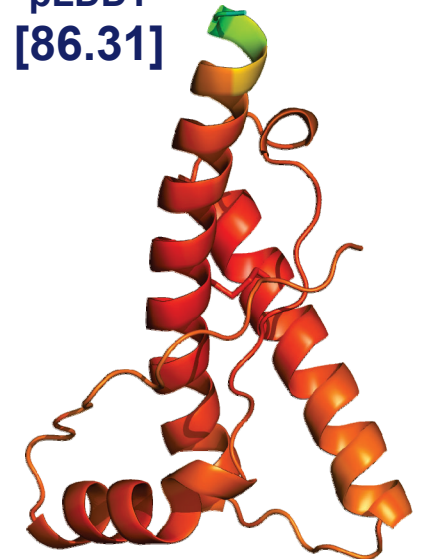

1 species sharing the same primary sequence

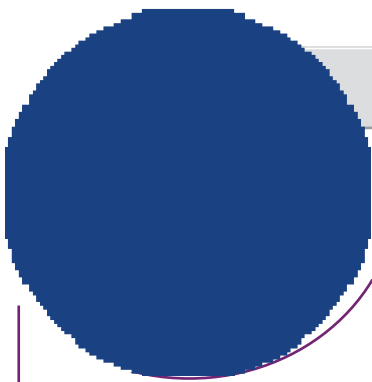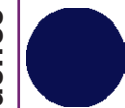

Little brown bat  
*Myotis lucifugus*

# Brandt's bat

GenBank: XM\_005874678

P41%

7.7



0-10

## *Myotis brandtii*

Chiroptera 23/45  
Vespertilionidae 7/16

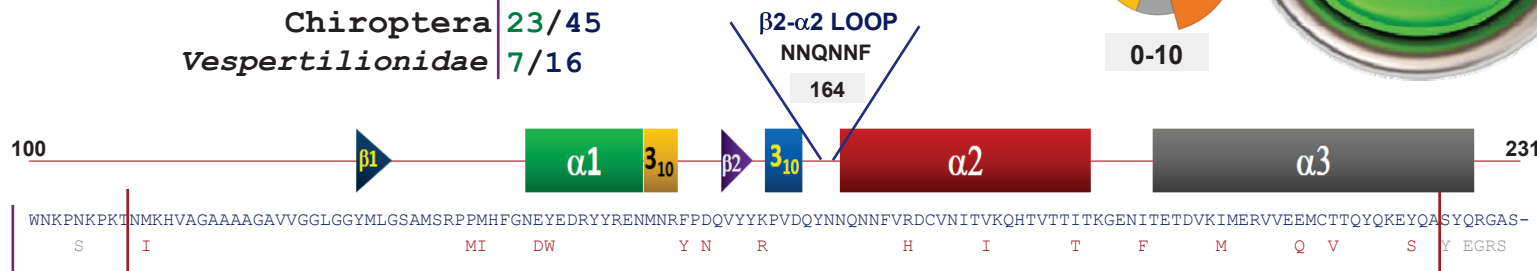

PrP sequence differs by 16 amino acids from the bank vole PrP (see in red)

- No deletions
- No insertions
- No polymorphic variants found

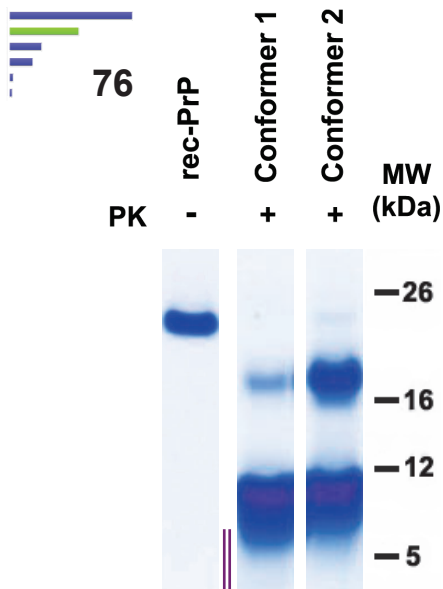

207 AA

2  
Conformers

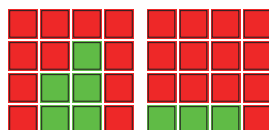

Tm<sup>Exp</sup>: ND

ΔΔG: -12.24

### *In vitro* studies

TgVole (1x) Not tested  
Brandt's bat Not tested

### *In vivo* studies

TgVole (1x) Not tested  
Brandt's bat Not tested

pLDDT [86.64]

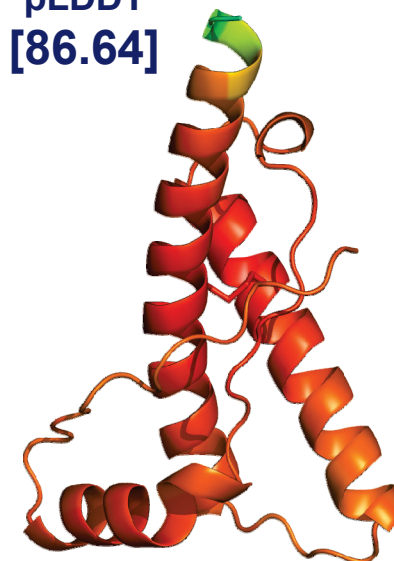

# David's myotis

GenBank: XM\_006758058

P41%

7.1

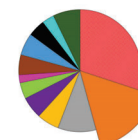

0-10

## Myotis davidii

Chiroptera 23/45  
Vespertilionidae 7/16

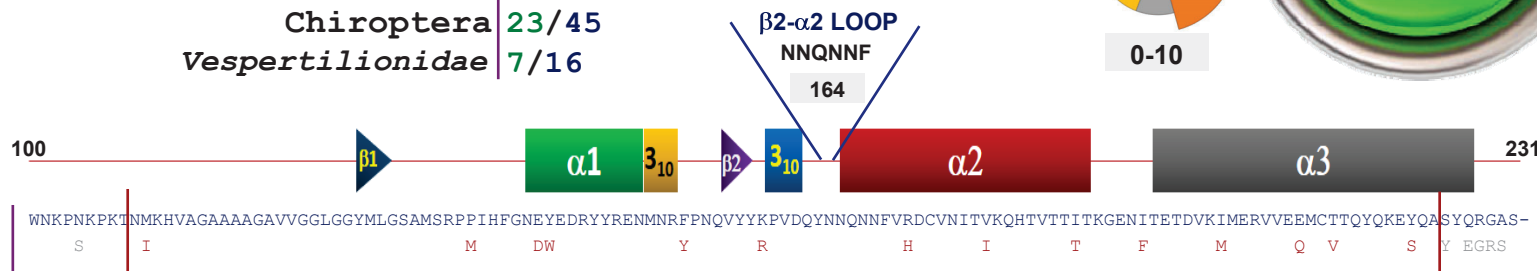

PrP sequence differs by 14 amino acids from the bank vole PrP (see in red)

No deletions  
No insertions  
No polymorphic variants found

2 species sharing the same primary sequence

Daubenton's bat  
*Myotis daubentonii*

Greater mouse-eared bat  
*Myotis myotis*

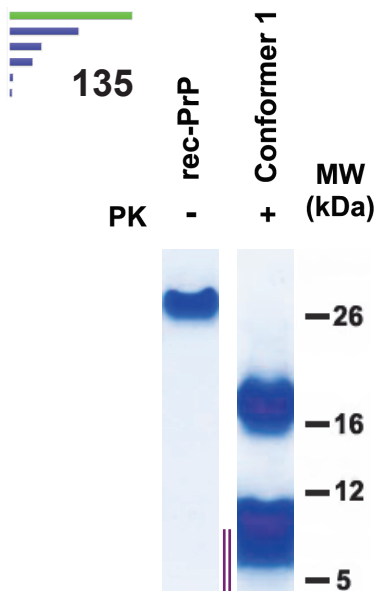

215 AA

1  
Conformers

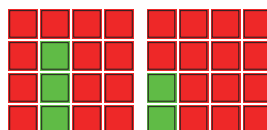

Tm<sup>Exp</sup>: ND

ΔΔG: -13.43

### In vitro studies

TgVole (1x) Not tested

David's myotis Not tested

### In vivo studies

TgVole (1x) Not tested

David's myotis Not tested

pLDDT  
[86.29]

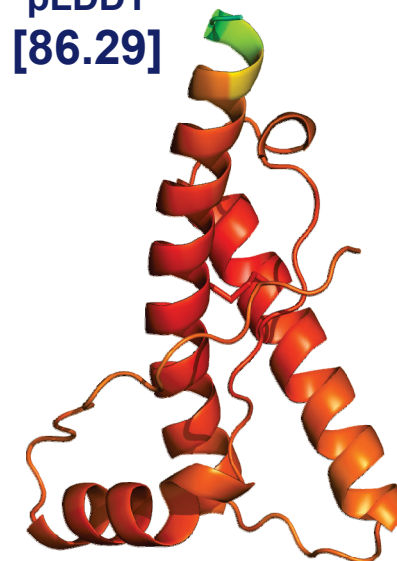

# Rickett's big-footed bat

GenBank: **BK064146**

P29%



0

## *Myotis ricketti*

Chiroptera 23/45  
Vespertilionidae 7/16

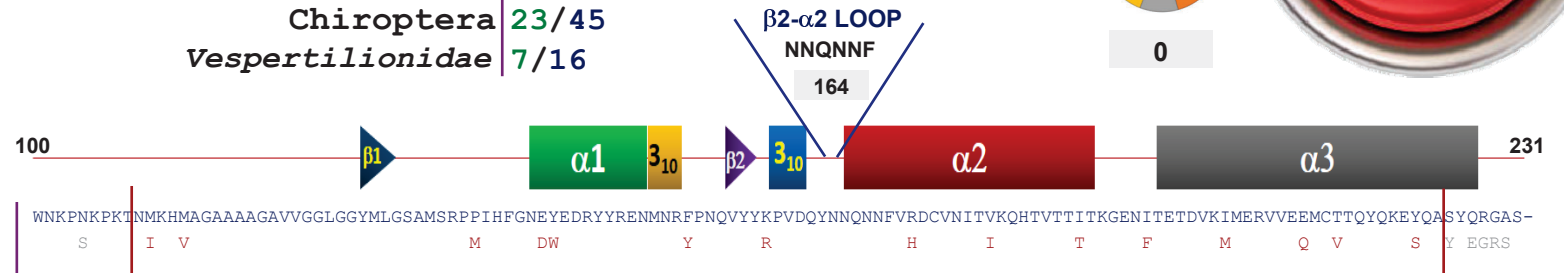

PrP sequence differs by 15 amino acids from the bank vole PrP (see in red)

No deletions  
No insertions  
No polymorphic variants found

Tm<sup>Exp</sup>: ND

ΔΔG: -12.32

Distinct primary sequence across species

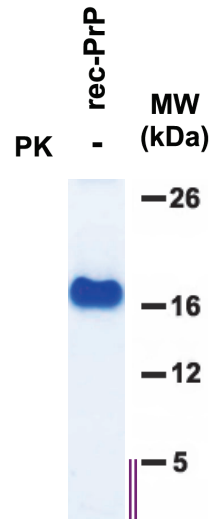

188 AA

0  
Conformers

**NO  
MISFOLDING**

*In vitro* studies

**NOT  
APPLICABLE**

*In vivo* studies

**NOT  
APPLICABLE**

pLDDT  
[86.53]

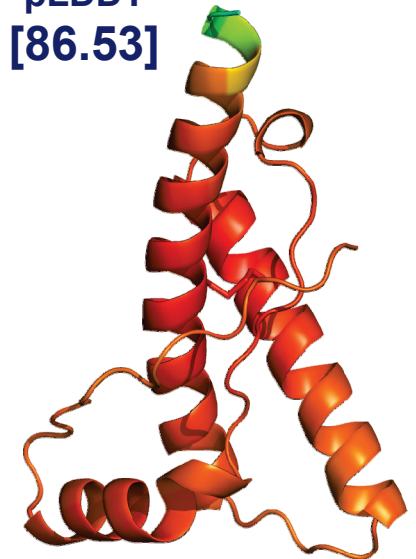



# Northern long-eared bat

GenBank: **BK064803**

P45%

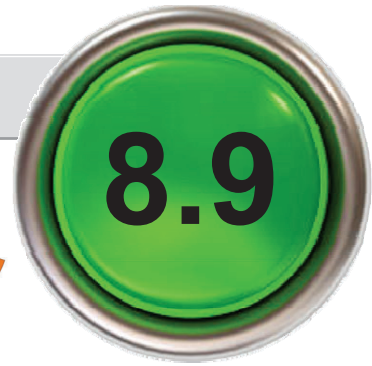

0-10

## *Myotis septentrionalis*

Chiroptera 23/45

Vespertilionidae 7/16

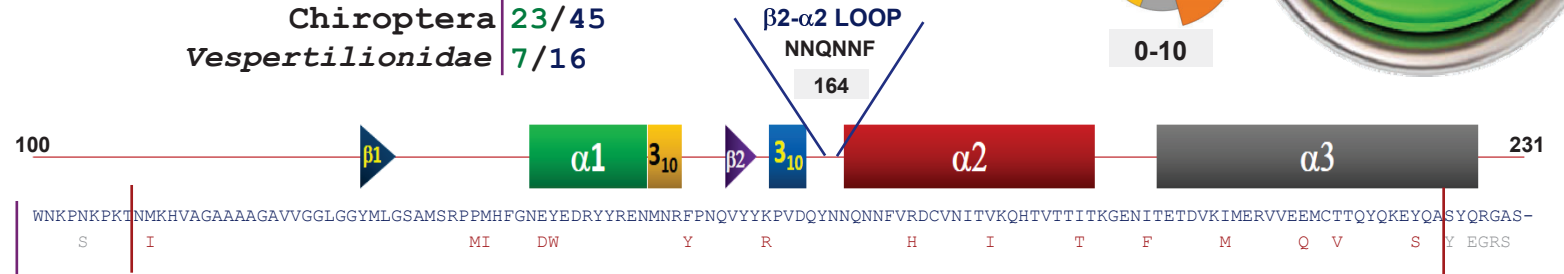

PrP sequence differs by 15 amino acids from the bank vole PrP (see in red)

No deletions  
 No insertions  
 No polymorphic variants found

Distinct primary sequence across species

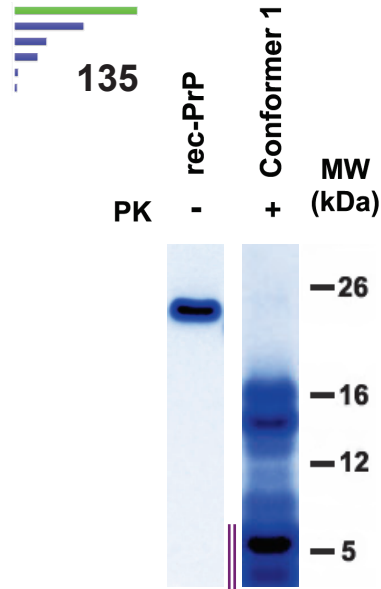

216 AA

1  
Conformers

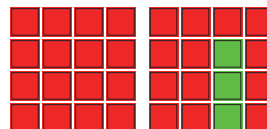

Tm<sup>Exp</sup>: ND

ΔΔG: -10.06

### *In vitro* studies

TgVole (1x) Not tested

Northern long-eared bat Not tested

### *In vivo* studies

TgVole (1x) Not tested

Northern long-eared bat Not tested

pLDDT [86.12]

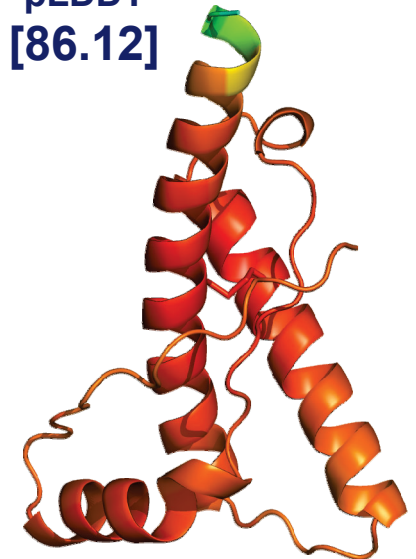

# Yuma myotis

GenBank: **BK064222**

P29%



0

## Myotis yumanensis

Chiroptera 23/45

Vespertilionidae 7/16

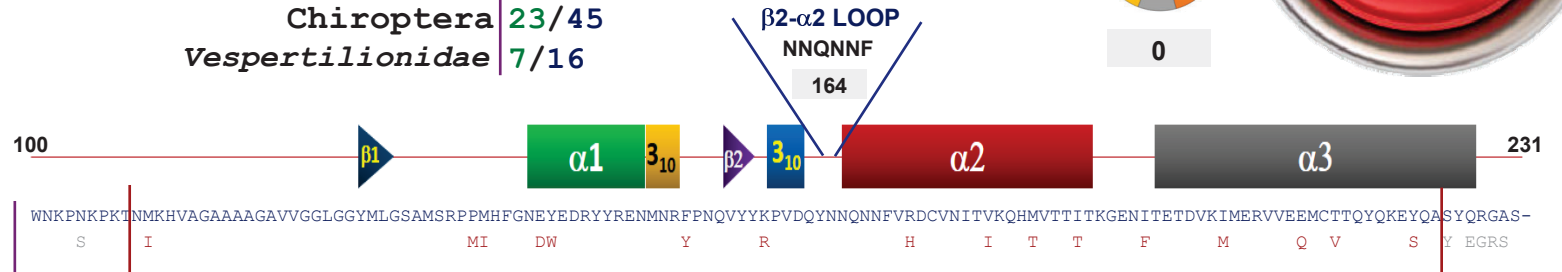

PrP sequence differs by 16 amino acids from the bank vole PrP (see in red)

- No deletions
- No insertions
- No polymorphic variants found

Tm<sup>Exp</sup>: ND

ΔΔG: -17.57

Distinct primary sequence across species

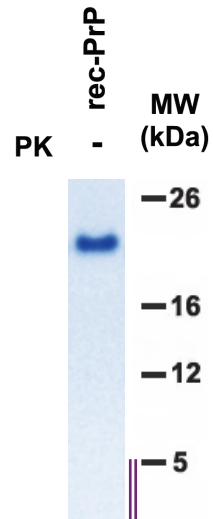

216 AA

0  
Conformers

**NO MISFOLDING**

*In vitro* studies

**NOT APPLICABLE**

*In vivo* studies

**NOT APPLICABLE**

pLDDT [92.56]

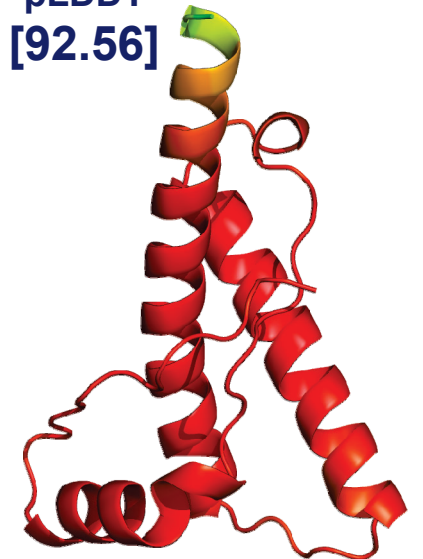

# Greater bulldog bat

GenBank: **BK064113**

P29%



0

## Noctilio leporinus

Chiroptera 23/45

Noctilionidae 0/1

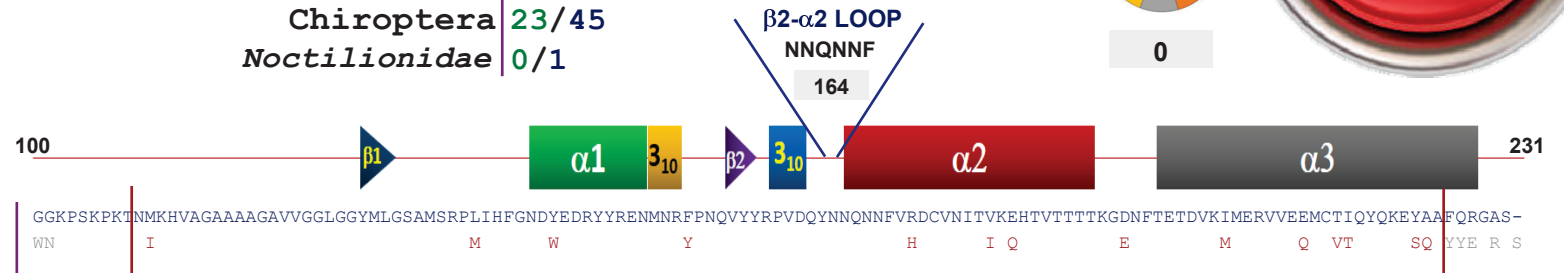

PrP sequence differs by 14 amino acids from the bank vole PrP (see in red)

- No deletions
- No insertions
- No polymorphic variants found

Tm<sup>Exp</sup>: ND

ΔΔG: ND

Distinct primary sequence across species

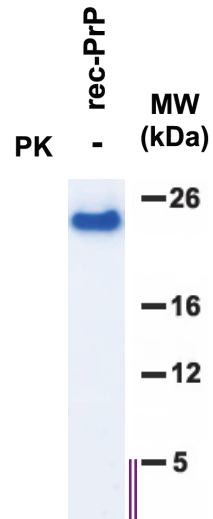

222 AA

0  
Conformers

**NO  
MISFOLDING**

*In vitro* studies

**NOT  
APPLICABLE**

*In vivo* studies

**NOT  
APPLICABLE**

pLDDT  
[86.94]

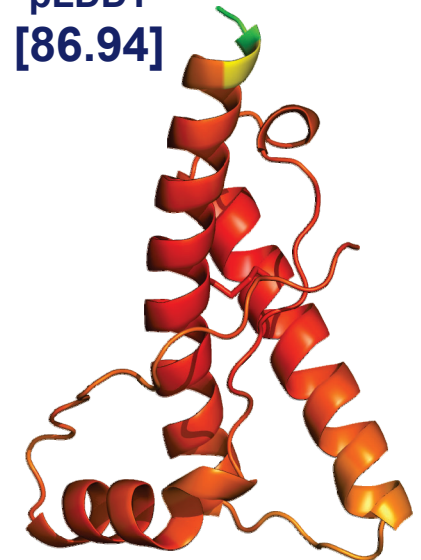

Distinct primary sequence across species

# Evening bat

GenBank: **BK064115**

*Nycticeius humeralis*

Chiroptera 23/45

Vespertilionidae 7/16

P29%



0

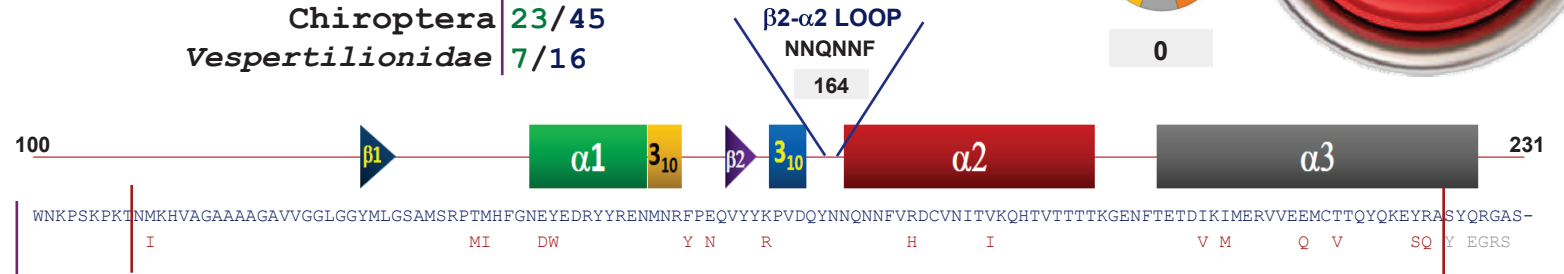

PrP sequence differs by 16 amino acids from the bank vole PrP (see in red)

- No deletions
- No insertions
- No polymorphic variants found

$T_m^{Exp}$ : ND

$\Delta\Delta G$ : -7.38

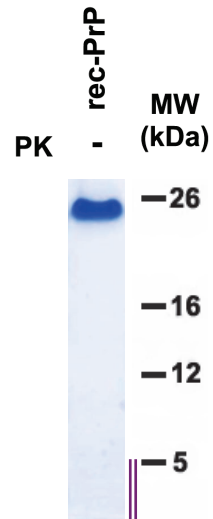

227 AA

0 Conformers

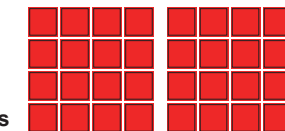

**NO MISFOLDING**

*In vitro* studies

NOT APPLICABLE

*In vivo* studies

NOT APPLICABLE

pLDDT [85.14]

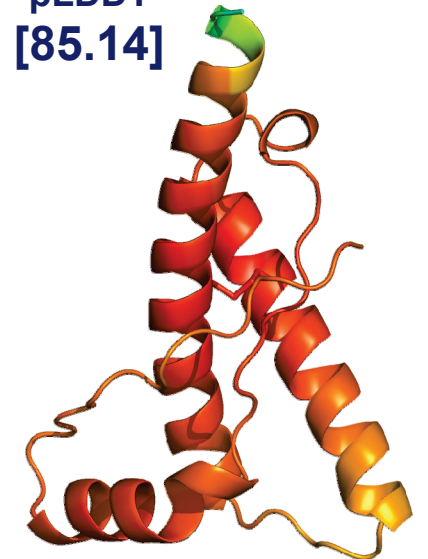

# Pale spear-nosed bat

GenBank: XP\_035865486

## *Phyllostomus discolor*

Chiroptera 23/45

Phyllostomidae 2/10

P29%



0

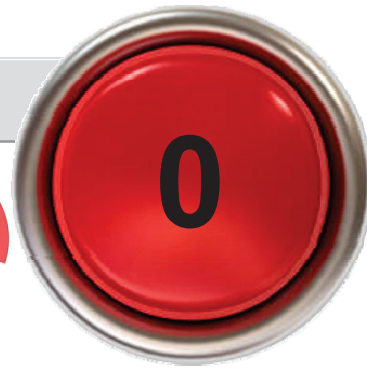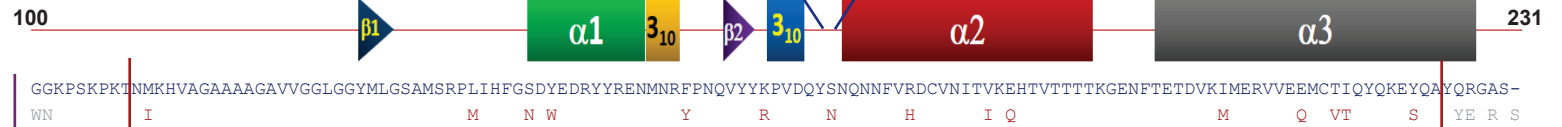

PrP sequence differs by 15 amino acids from the bank vole PrP (see in red)

No deletions  
No insertions  
It shows polymorphic variants

T<sub>m</sub><sup>Exp</sup>: ND

ΔΔG: ND

Distinct primary sequence across species

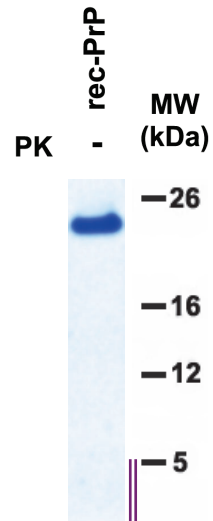

225 AA

0  
Conformers

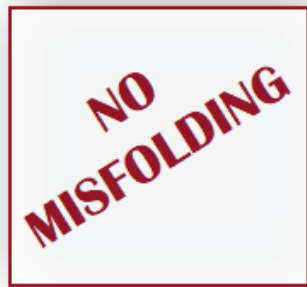

*In vitro* studies

NOT APPLICABLE

*In vivo* studies

NOT APPLICABLE

pLDDT [87.53]

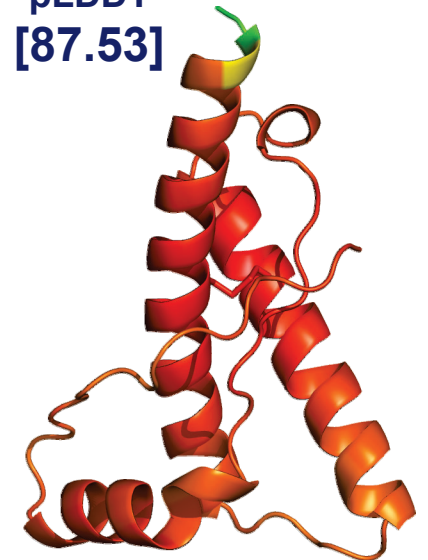

# Kuhl's pipistrelle

GenBank: XM\_036417932

P39%

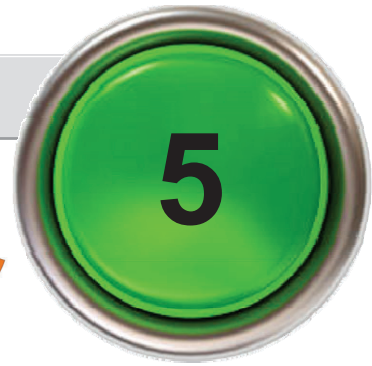

0-10

## *Pipistrellus kuhlii*

Chiroptera 23/45

Vespertilionidae 7/16

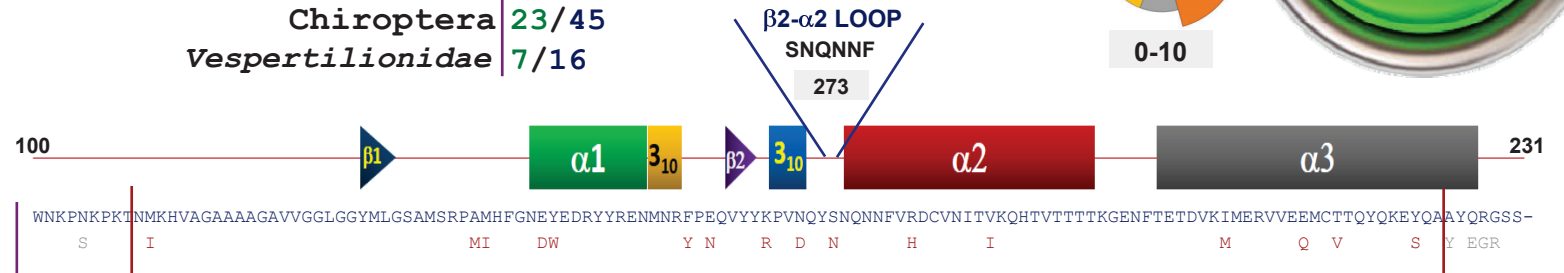

PrP sequence differs by 16 amino acids from the bank vole PrP (see in red)

- No deletions
- No insertions
- No polymorphic variants found

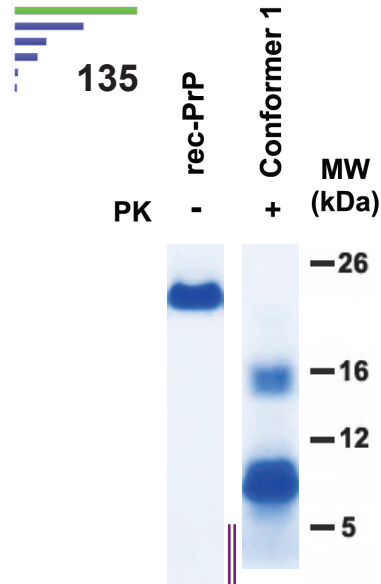

218 AA

1 Conformers

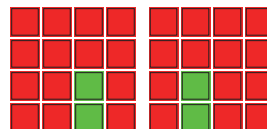

Tm<sup>Exp</sup>: ND

ΔΔG: -3.52

### *In vitro* studies

TgVole (1x) Not tested

Kuhl's pipistrelle Not tested

### *In vivo* studies

TgVole (1x) Not tested

Kuhl's pipistrelle Not tested

pLDDT [85.05]

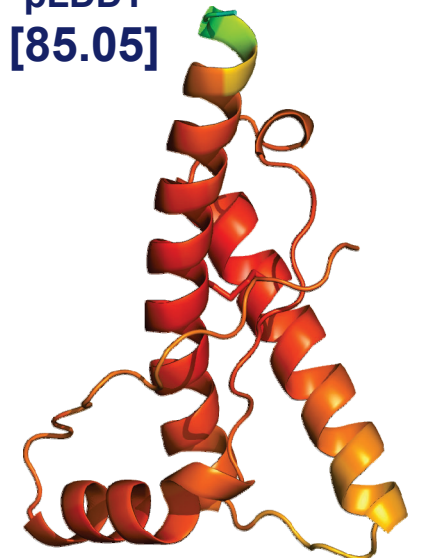

1 species sharing the same primary sequence

Common pipistrelle  
*Pipistrellus pipistrellus*

# Lump-nosed bat

GenBank: [OR472453](#)

P29%



0

*Plecotus auritus*

Chiroptera 23/45

Vespertilionidae 7/16

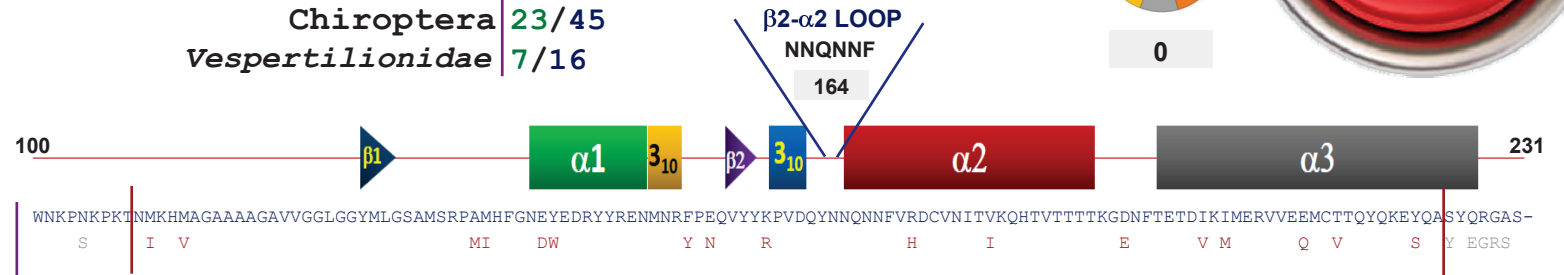

PrP sequence differs by 17 amino acids from the bank vole PrP (see in red)

- No deletions
- No insertions
- No polymorphic variants found

Tm<sup>Exp</sup>: ND

ΔΔG: -3.01

Distinct primary sequence across species

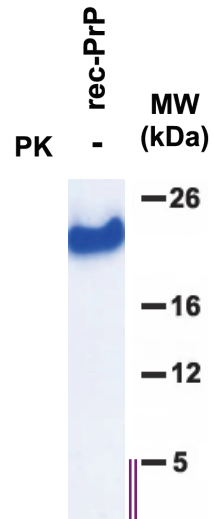

218 AA

0 Conformers

**NO MISFOLDING**

*In vitro* studies

**NOT APPLICABLE**

*In vivo* studies

**NOT APPLICABLE**

pLDDT [84.99]

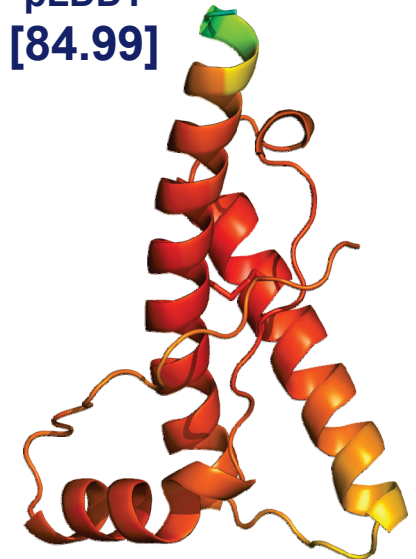

# Parnell's mustached bat

GenBank: **BK063967**

*Pteronotus parnellii*

Chiroptera 23/45  
Mormoopidae 0/2

P29%



0

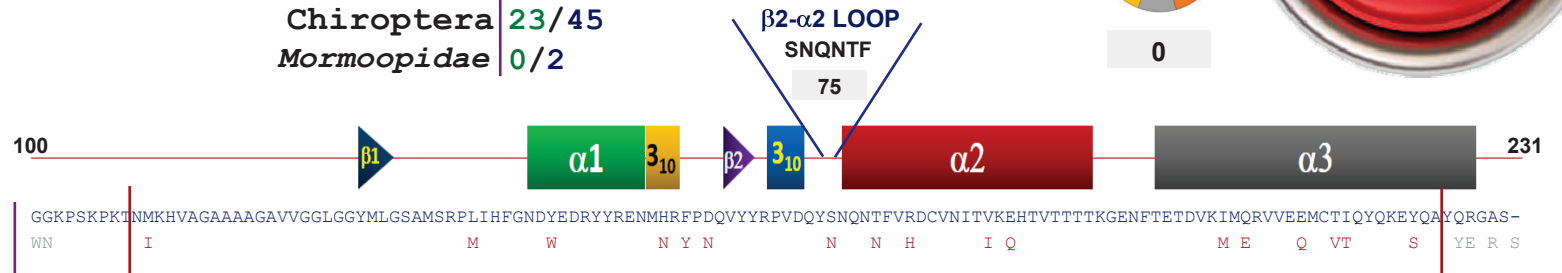

PrP sequence differs by 17 amino acids from the bank vole PrP (see in red)

No deletions  
No insertions  
No polymorphic variants found

Tm<sup>Exp</sup>: ND  
ΔΔG: ND

Distinct primary sequence across species

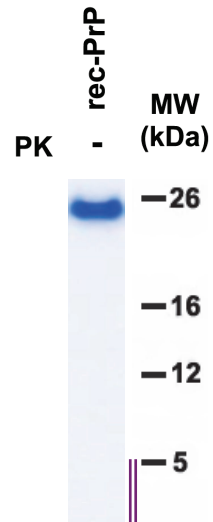

223 AA

0  
Conformers

**NO MISFOLDING**

*In vitro* studies

**NOT APPLICABLE**

*In vivo* studies

**NOT APPLICABLE**

pLDDT [87.17]

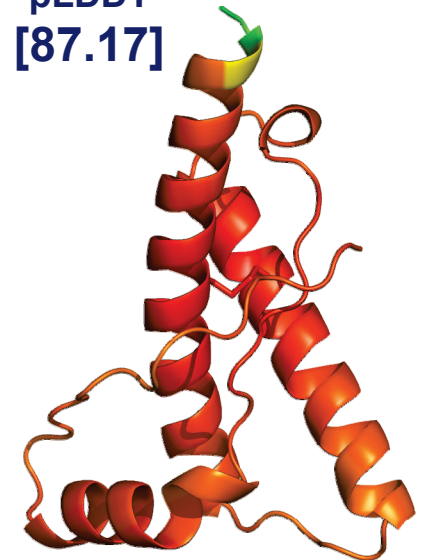



# Black flying fox

GenBank: XM\_015597302

P92%

96.4

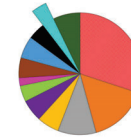

90-100

## *Pteropus alecto*

Chiroptera 23/45

Pteropodidae 8/8

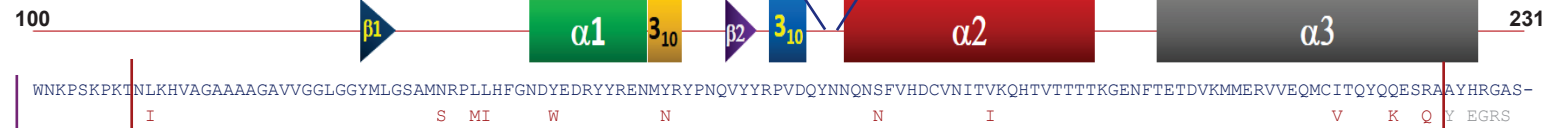

PrP sequence differs by 11 amino acids from the bank vole PrP (see in red)

No deletions  
No insertions  
No polymorphic variants found

5 species sharing the same primary sequence

- Indian flying fox *Pteropus medius*
- Bonin flying fox *Pteropus pselaphon*
- Rodrigues flying fox *Pteropus rodricensis*
- Madagascan flying fox *Pteropus rufus*
- Large flying fox *Pteropus vampyrus*

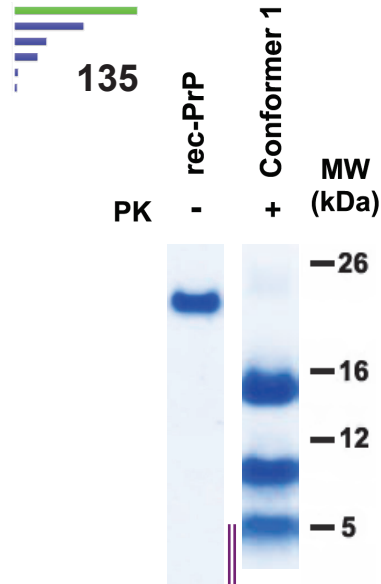

220 AA

1  
Conformers

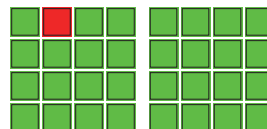

Tm<sup>Exp</sup>: ND

ΔΔG: -6.57

### In vitro studies

TgVole (1x) Not tested

Black flying fox Not tested

### In vivo studies

TgVole (1x) Not tested

Black flying fox Not tested

pLDDT [84.65]

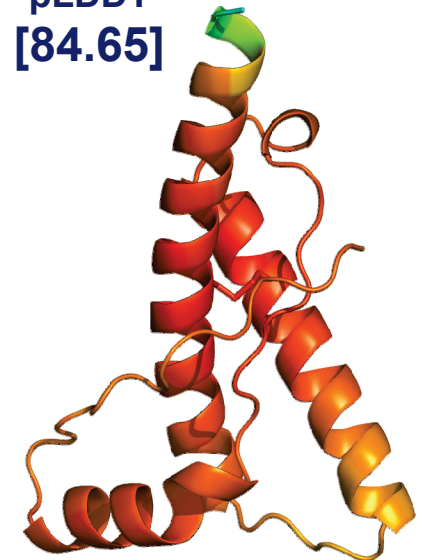

# Greater horseshoe bat

GenBank: **BK063922**

P29%



0

## *Rhinolophus ferrumequinum*

Chiroptera 23/45

Rhinolophidae 1/2

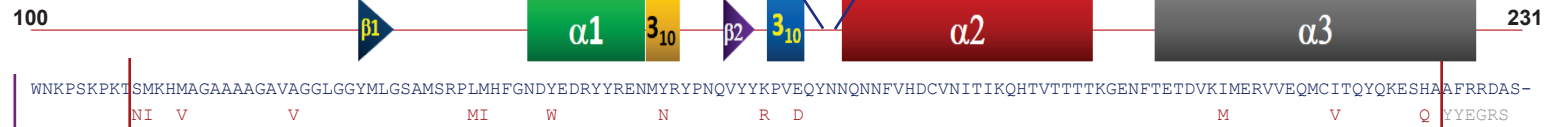

PrP sequence differs by 13 amino acids from the bank vole PrP (see in red)

- No deletions
- No insertions
- No polymorphic variants found

Tm<sup>Exp</sup>: ND

ΔΔG: -6.69

Distinct primary sequence across species

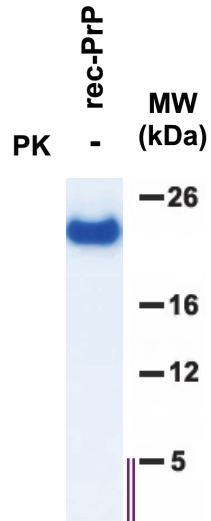

212 AA

0 Conformers

**NO MISFOLDING**



*In vitro* studies

**NOT APPLICABLE**

*In vivo* studies

**NOT APPLICABLE**

pLDDT [88.61]

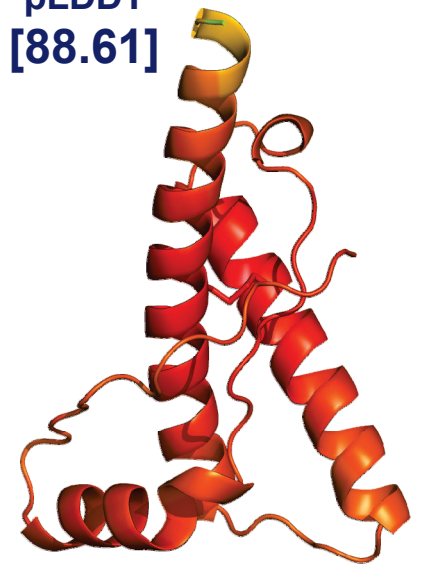

Distinct primary sequence across species

# Chinese rufous horseshoe bat

GenBank: **BK063992**

**P34%**

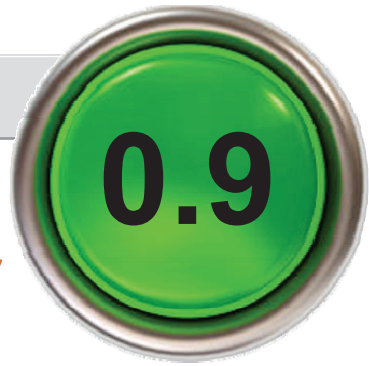

0-10

## *Rhinolophus sinicus*

Chiroptera 23/45  
Rhinolophidae 1/2

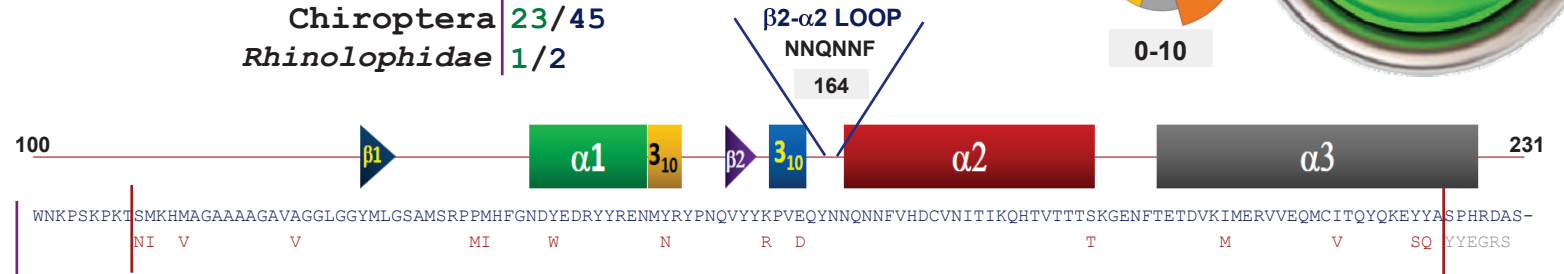

PrP sequence differs by 15 amino acids from the bank vole PrP (see in red)

No deletions  
No insertions  
No polymorphic variants found

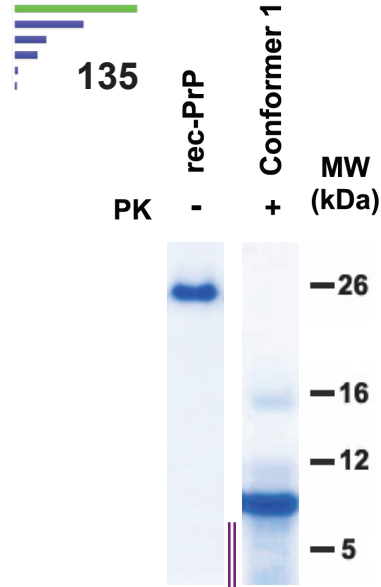

212 AA

1  
Conformers

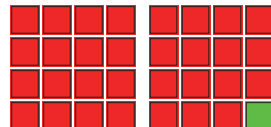

$T_m^{Exp}$ : ND

$\Delta\Delta G$ : -3.92

### *In vitro* studies

TgVole (1x) Not tested

Chinese rufous horseshoe bat Not tested

### *In vivo* studies

TgVole (1x) Not tested

Chinese rufous horseshoe bat Not tested

pLDDT [88.13]

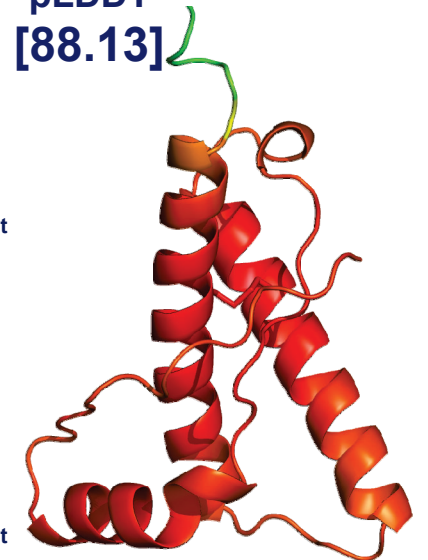

# Egyptian fruit bat

GenBank: XM\_016135122

P100%

100

## *Rousettus aegyptiacus*

Chiroptera 23/45  
Pteropodidae 8/8

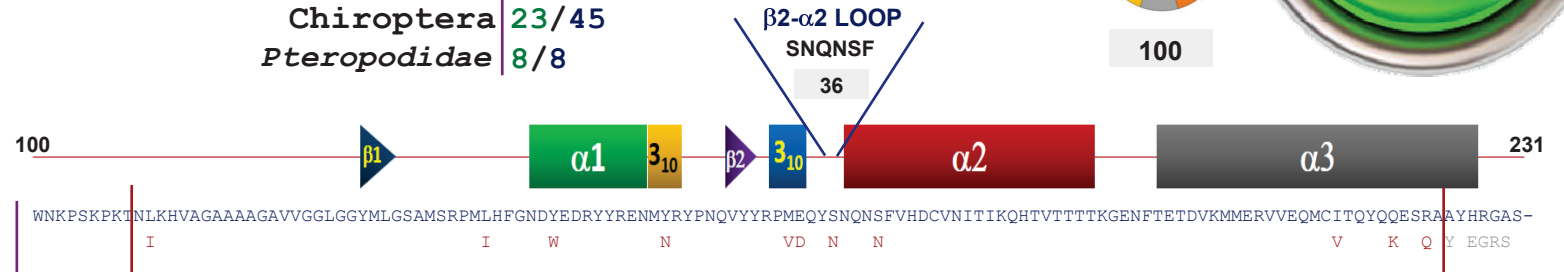

PrP sequence differs by 11 amino acids from the bank vole PrP (see in red)

No deletions  
No insertions  
It shows polymorphic variants

Distinct primary sequence across species

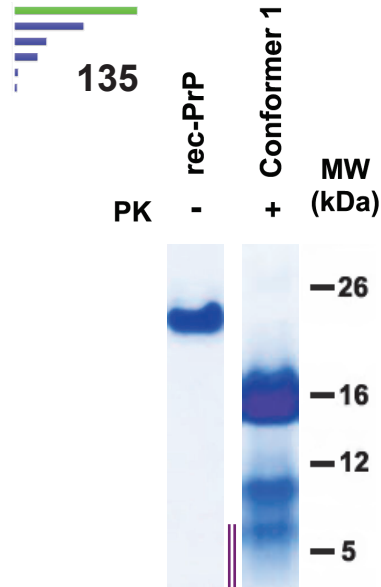

203 AA

1  
Conformers



$T_m^{Exp}$ : 67.2 °C

$\Delta\Delta G$ : -20.62

*In vitro* studies

TgVole (1x) Propagate

Egyptian fruit bat Ongoing

*In vivo* studies

TgVole (1x) Infectious

Egyptian fruit bat Not tested

pLDDT [85.55]

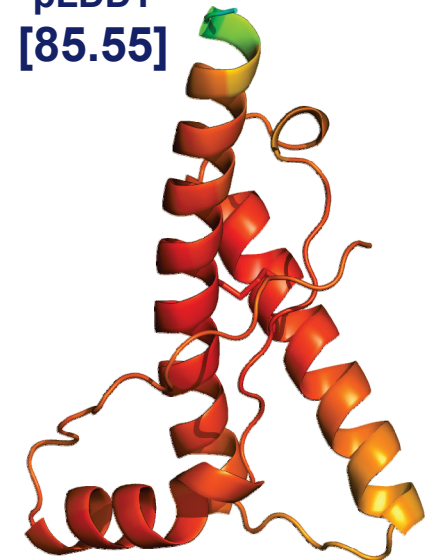

# Leschenault's rousette

GenBank: **BK063997**

**P54%**

**19.3**

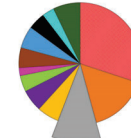

10-20

## *Rousettus leschenaultii*

Chiroptera 23/45  
Pteropodidae 8/8

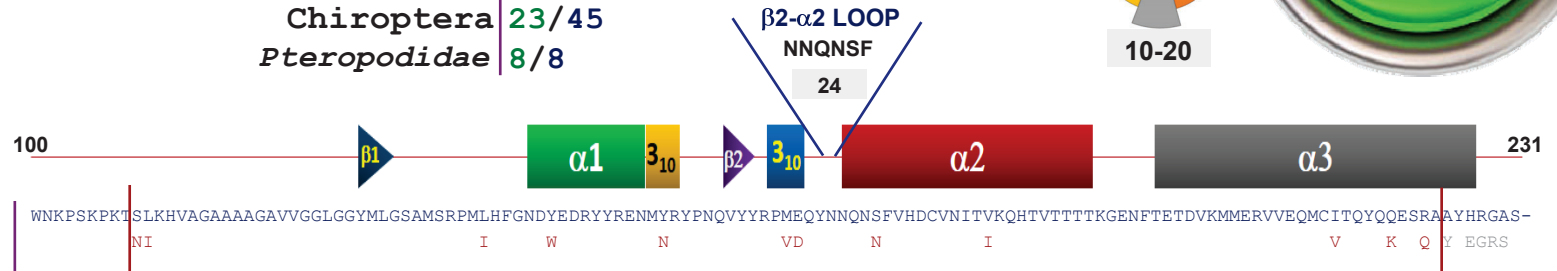

PrP sequence differs by 12 amino acids from the bank vole PrP (see in red)

- No deletions
- No insertions
- No polymorphic variants found

Distinct primary sequence across species

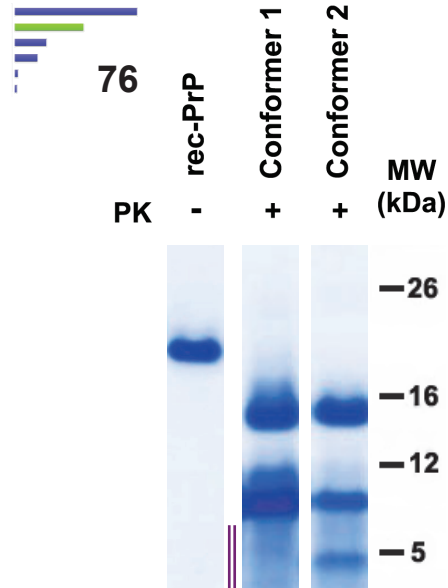

195 AA

**2**  
Conformers

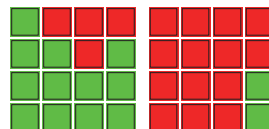

$T_m^{Exp}$ : ND

$\Delta\Delta G$ : -20.82

### *In vitro* studies

TgVole (1x) Not tested

Leschenault's rousette Not tested

### *In vivo* studies

TgVole (1x) Not tested

Leschenault's rousette Not tested

pLDDT  
[86.87]

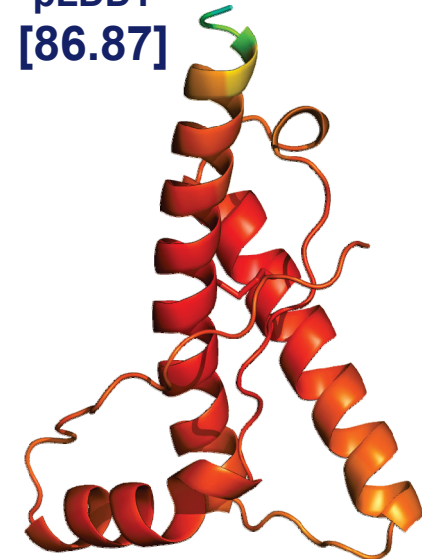

# Madagascan rousette

GenBank: **BK064805**

P71%

48.2



40-50

## *Rousettus madagascariensis*

Chiroptera 23/45  
Pteropodidae 8/8

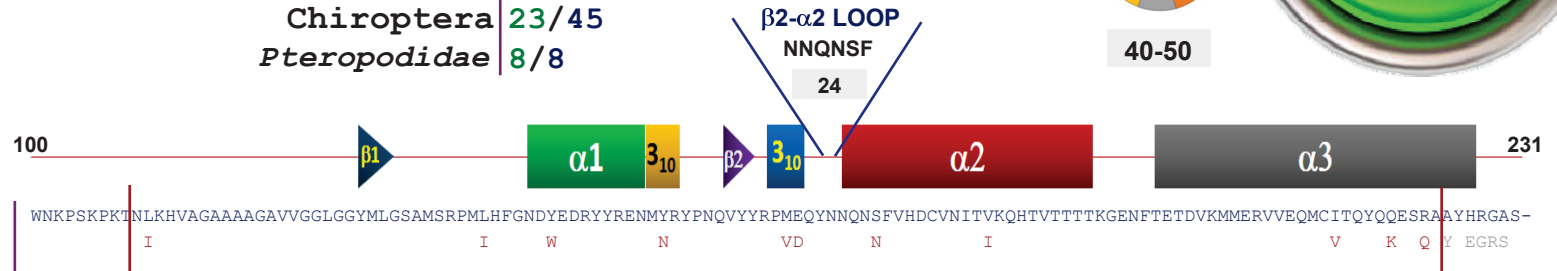

PrP sequence differs by 11 amino acids from the bank vole PrP (see in red)

- No deletions
- No insertions
- No polymorphic variants found

Distinct primary sequence across species

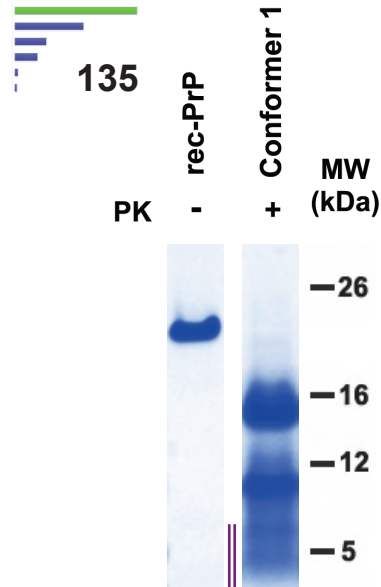

203 AA

1  
Conformers

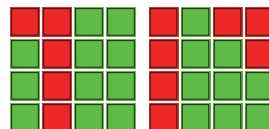

Tm<sup>Exp</sup>: ND

ΔΔG: -18.77

### *In vitro* studies

- TgVole (1x) Not tested
- Madagascan rousette Not tested

### *In vivo* studies

- TgVole (1x) Not tested
- Madagascan rousette Not tested

pLDDT [85.48]

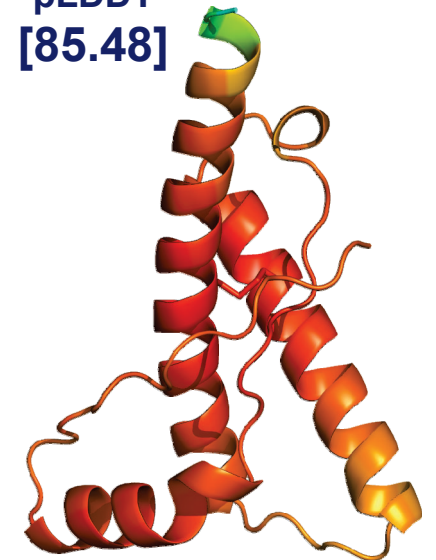

# Honduran yellow-shouldered bat

GenBank: **BK063970**

P29%



0

## *Sturnira ludovici hondurensis*

Chiroptera 23/45  
Phyllostomidae 2/10

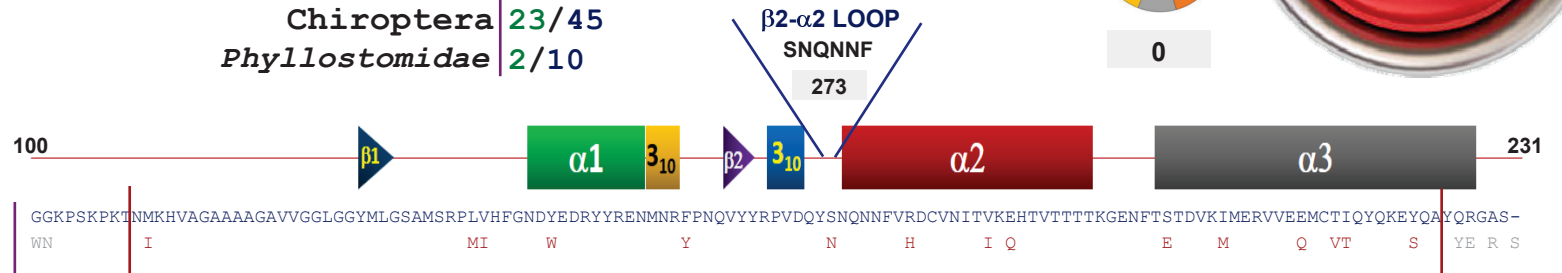

PrP sequence differs by 15 amino acids from the bank vole PrP (see in red)

No deletions  
No insertions  
No polymorphic variants found

Tm<sup>Exp</sup>: ND

ΔΔG: ND

Distinct primary sequence across species

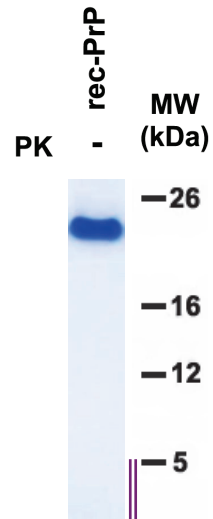

216 AA

0  
Conformers

**NO  
MISFOLDING**

 *In vitro* studies

**NOT  
APPLICABLE**

 *In vivo* studies

**NOT  
APPLICABLE**

pLDDT  
[84.95]

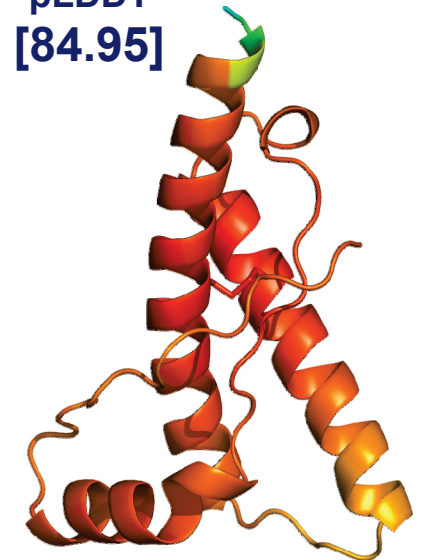

# Mexican free-tailed bat

GenBank: **BK064001**

P41%

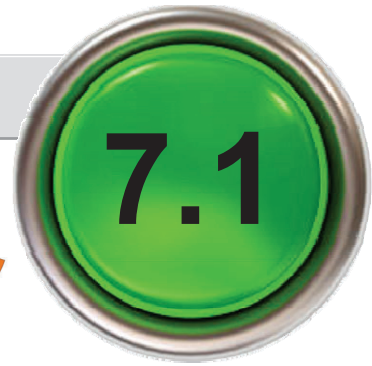

0-10

## *Tadarida brasiliensis*

Chiroptera 23/45  
Molossidae 2/2

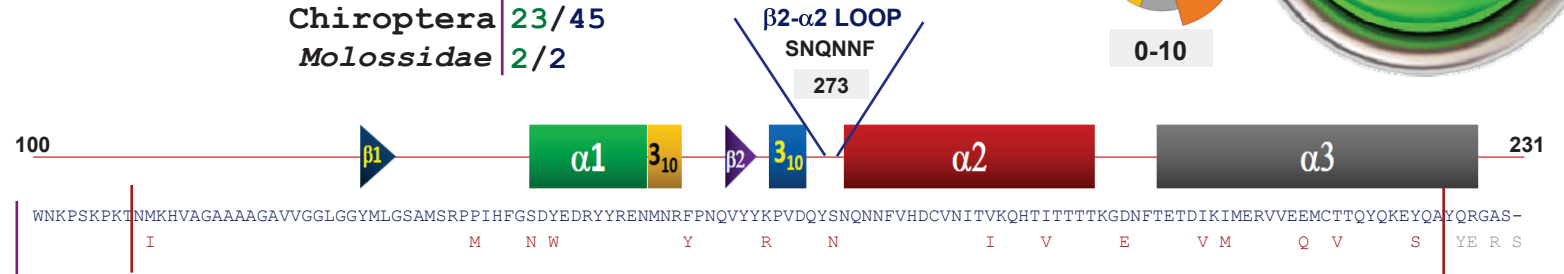

PrP sequence differs by 15 amino acids from the bank vole PrP (see in red)

No deletions  
No insertions  
No polymorphic variants found

Distinct primary sequence across species

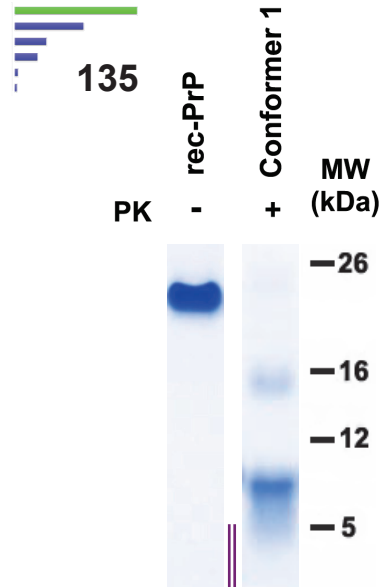

224 AA

**1**  
Conformers

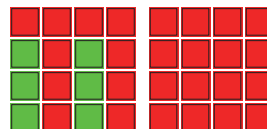

Tm<sup>Exp</sup>: ND  
ΔΔG: ND

### *In vitro* studies

TgVole (1x) Not tested

Mexican free-tailed bat Not tested

### *In vivo* studies

TgVole (1x) Not tested

Mexican free-tailed bat Not tested

pLDDT  
[86.35]

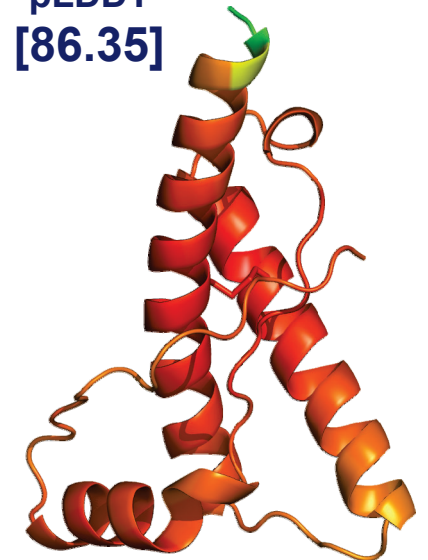



1 species sharing the same primary sequence

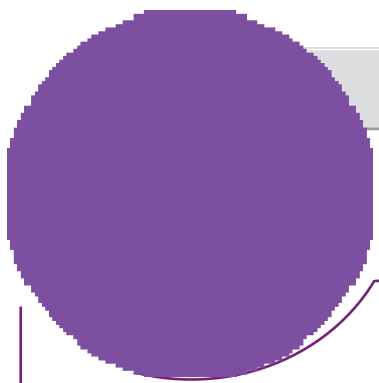

# Stripe-headed round-eared bat

GenBank: **BK064003**

## *Tonatia saurophila*

Chiroptera 23/45

Phyllostomidae 2/10

P29%



0



Greater spear-nosed bat  
*Phyllostomus hastatus*

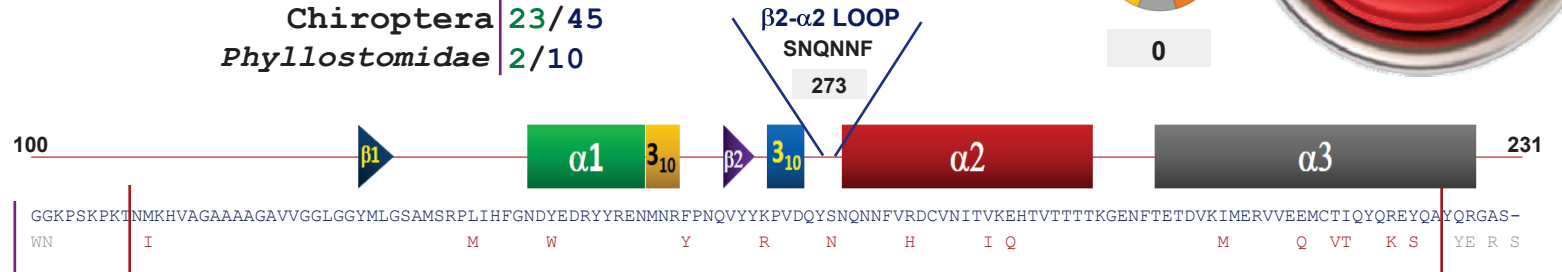

PrP sequence differs by 15 amino acids from the bank vole PrP (see in red)

- No deletions
- No insertions
- No polymorphic variants found

Tm<sup>Exp</sup>: ND

ΔΔG: ND

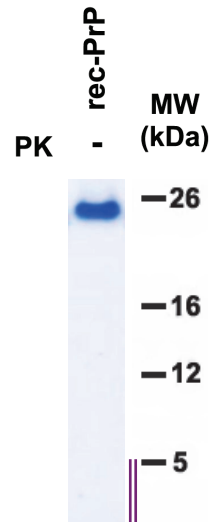

**NO MISFOLDING**

*In vitro* studies

**NOT APPLICABLE**

*In vivo* studies

**NOT APPLICABLE**

pLDDT [86.72]

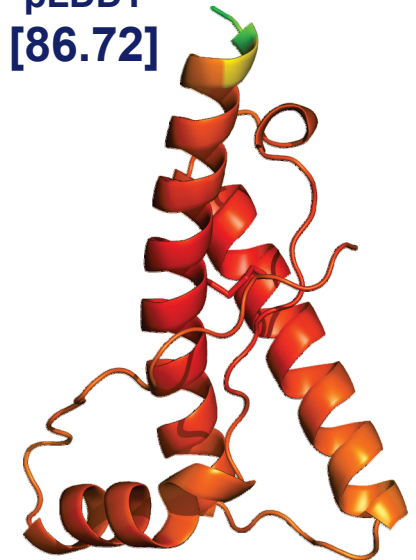

225 AA

0 Conformers



# Fringe-lipped bat

GenBank: **BK064958**

P29%

0

## *Trachops cirrhosus*

Chiroptera 23/45

Phyllostomidae 2/10

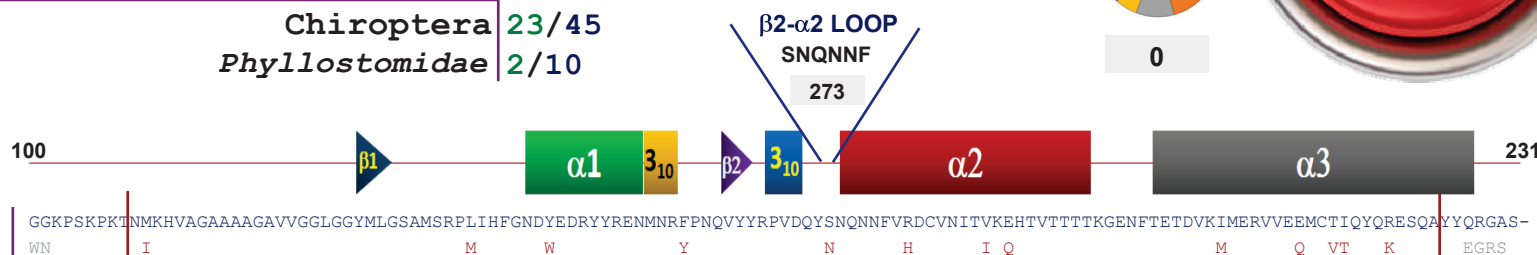

PrP sequence differs by 13 amino acids from the bank vole PrP (see in red)

No deletions  
No insertions  
No polymorphic variants found

$T_m^{Exp}$ : ND

$\Delta\Delta G$ : -13.99

Distinct primary sequence across species

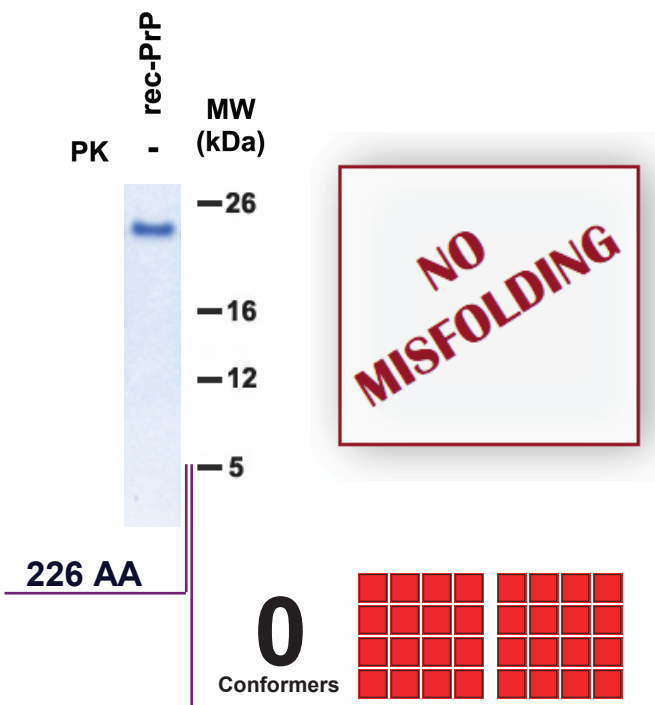

*In vitro* studies

NOT APPLICABLE

*In vivo* studies

NOT APPLICABLE

pLDDT [86.53]

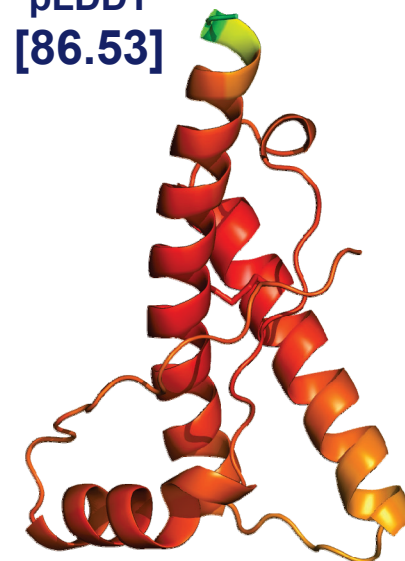

Distinct primary sequence across species

# Southern naked-tailed armadillo

GenBank: **BK064228**

P29%



0

## *Cabassous unicinctus*

Cingulata 1/4

Dasypodidae 1/4

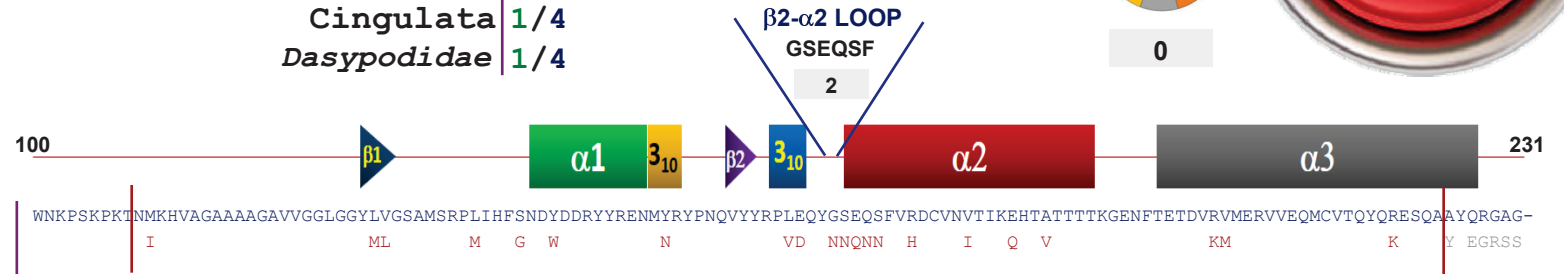

PrP sequence differs by 22 amino acids from the bank vole PrP (see in red)

- No deletions
- No insertions
- No polymorphic variants found

Tm<sup>Exp</sup>: ND

ΔΔG: -14.75

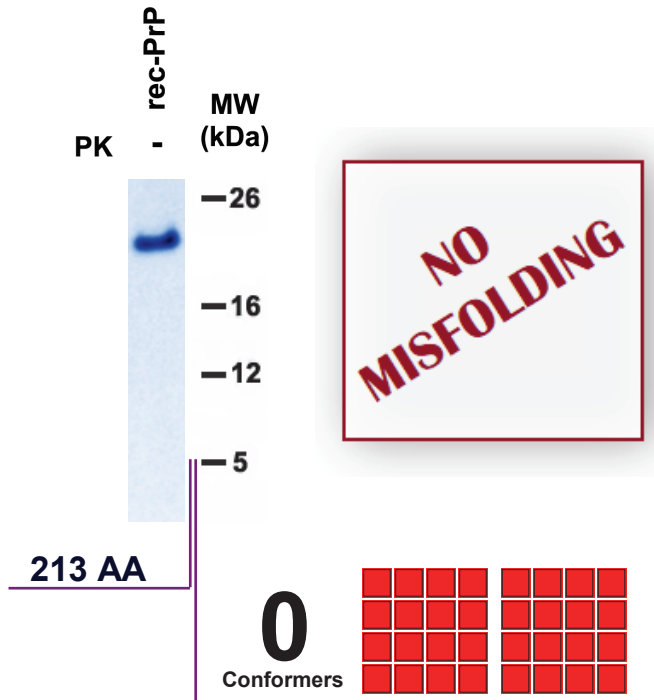

*In vitro* studies

NOT APPLICABLE

*In vivo* studies

NOT APPLICABLE

pLDDT [91.82]

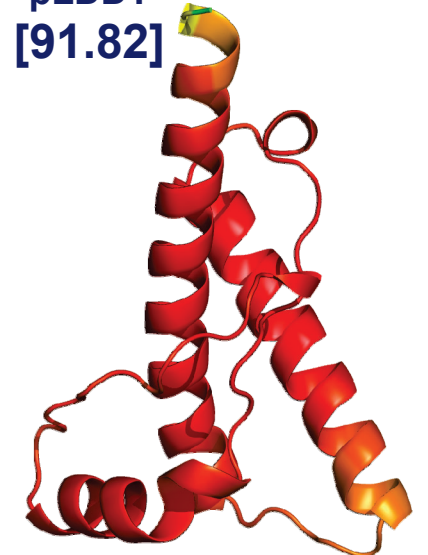

# Screaming hairy armadillo

GenBank: **BK064063**

P29%



0

## *Chaetophractus vellerosus*

Cingulata 1/4  
Dasypodidae 1/4

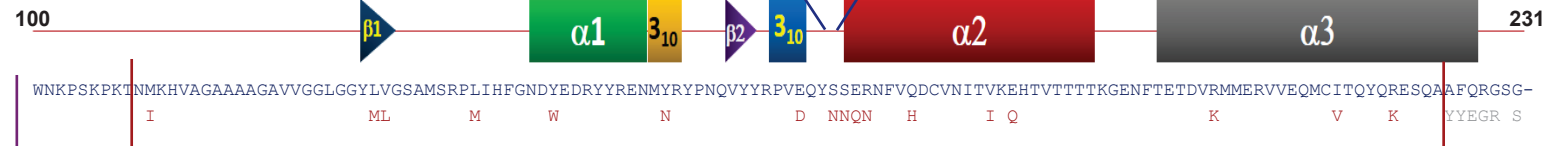

PrP sequence differs by 17 amino acids from the bank vole PrP (see in red)

- No deletions
- No insertions
- No polymorphic variants found

Tm<sup>Exp</sup>: ND

ΔΔG: **-17.17**

1 species sharing the same primary sequence

Six-banded armadillo  
*Euphractus sexcinctus*

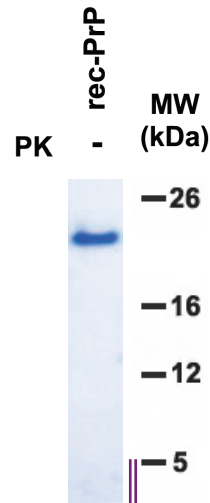

211 AA

0  
Conformers

**NO MISFOLDING**

*In vitro* studies

**NOT APPLICABLE**

*In vivo* studies

**NOT APPLICABLE**

pLDDT  
[86.09]

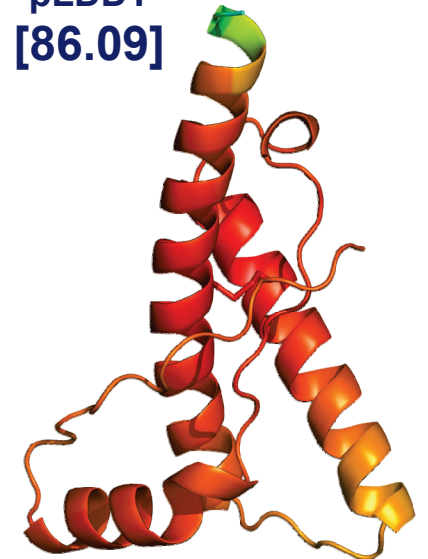

# Nine-banded armadillo

GenBank: EU559337

P31%

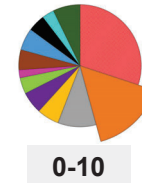

0-10

## *Dasyus novemcinctus*

Cingulata 1/4  
*Dasypodidae* 1/4

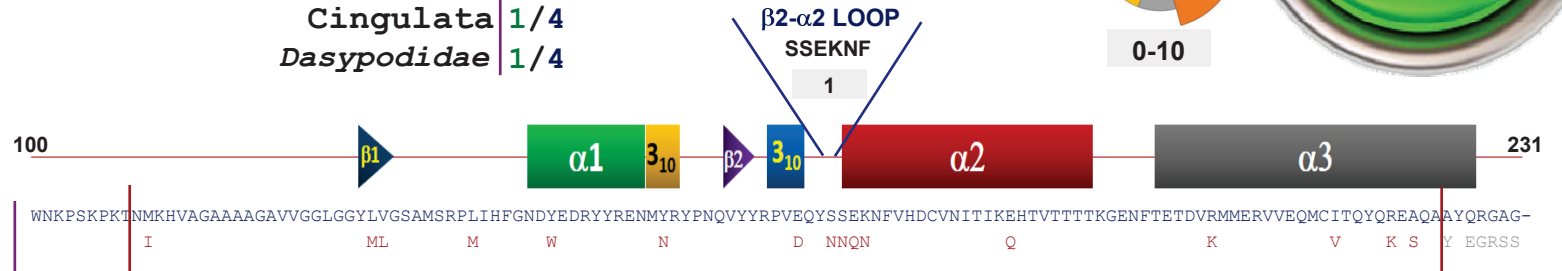

PrP sequence differs by 16 amino acids from the bank vole PrP (see in red)

- No deletions
- No insertions
- No polymorphic variants found

Distinct primary sequence across species

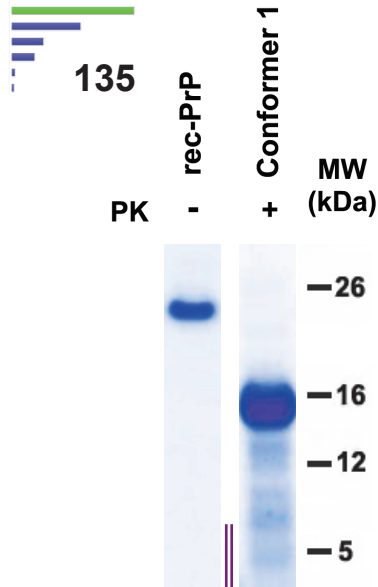

210 AA

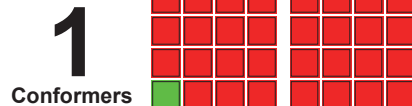

Tm<sup>Exp</sup>: ND

ΔΔG: -20.08

### *In vitro* studies

- TgVole (1x) Not tested
- Nine-banded armadillo Not tested

### *In vivo* studies

- TgVole (1x) Not tested
- Nine-banded armadillo Not tested

pLDDT [86.09]

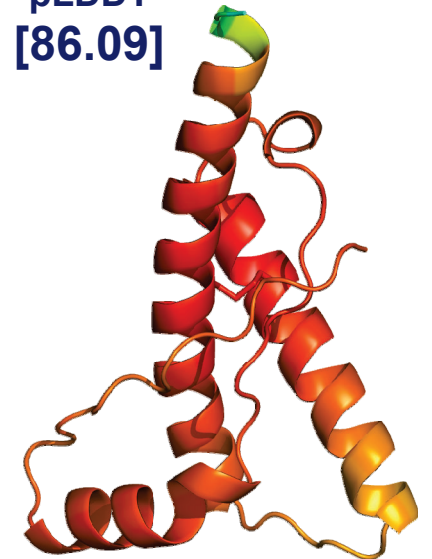

Distinct primary sequence across species

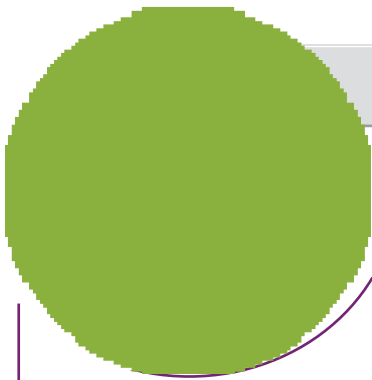

# Southern three-banded armadillo

GenBank: **BK064002**

## *Tolypeutes matacus*

Cingulata 1/4  
Dasypodidae 1/4

P29%



0

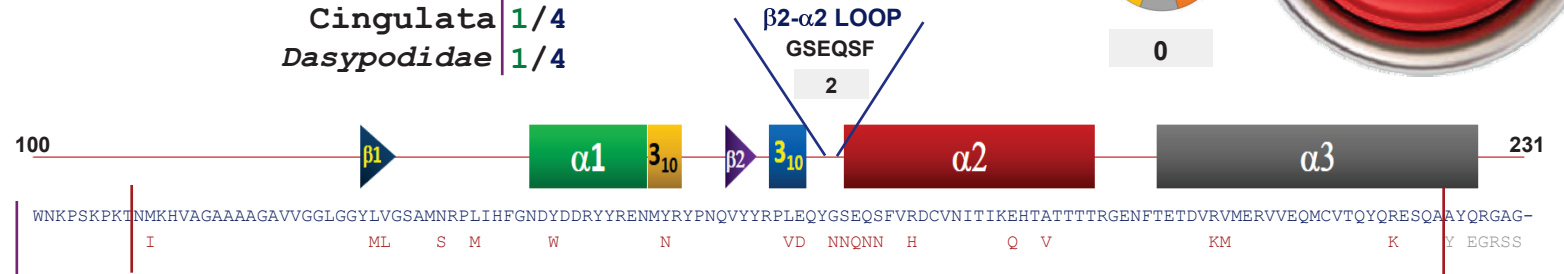

PrP sequence differs by 21 amino acids from the bank vole PrP (see in red)

- No deletions
- No insertions
- No polymorphic variants found

$T_m^{Exp}$ : ND

$\Delta\Delta G$ : -8.09

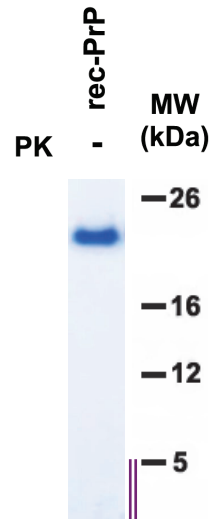

211 AA

0  
Conformers

**NO MISFOLDING**

*In vitro* studies

**NOT APPLICABLE**

*In vivo* studies

**NOT APPLICABLE**

pLDDT [87.05]

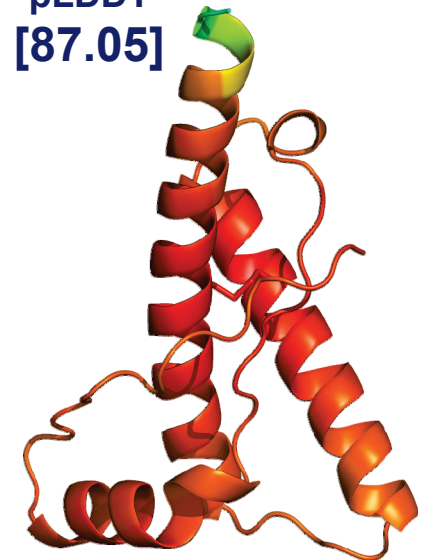

# Yellow-footed antechinus

GenBank: **BK063971**

P29%



0



## *Antechinus flavipes*

Dasyuromorphia 4/9

Dasyuridae 3/7

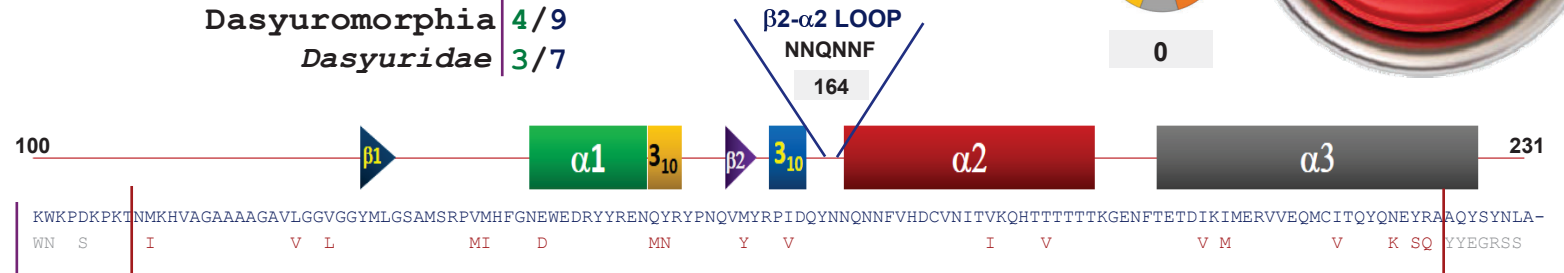

PrP sequence differs by 18 amino acids from the bank vole PrP (see in red)

- No deletions
- No insertions
- No polymorphic variants found

Tm<sup>Exp</sup>: ND

ΔΔG: ND

Distinct primary sequence across species

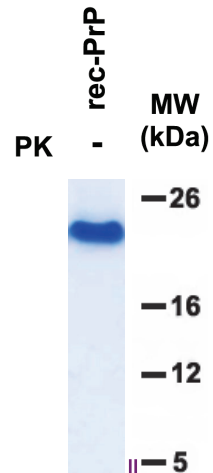

218 AA

0 Conformers

**NO MISFOLDING**

*In vitro* studies

**NOT APPLICABLE**

*In vivo* studies

**NOT APPLICABLE**

pLDDT [92.27]

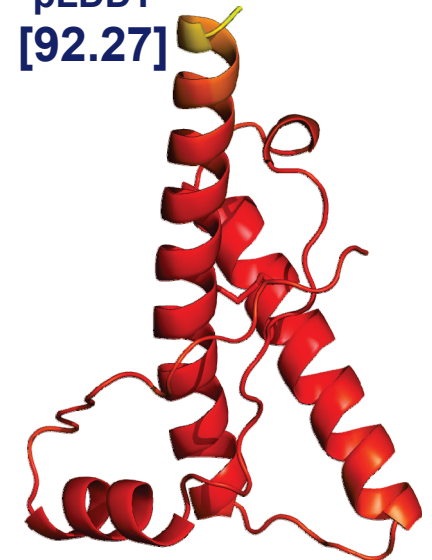

# Brown antechinus

GenBank: **BK063930**

P29%



0

## *Antechinus stuartii*

Dasyuromorphia 4/9

Dasyuridae 3/7

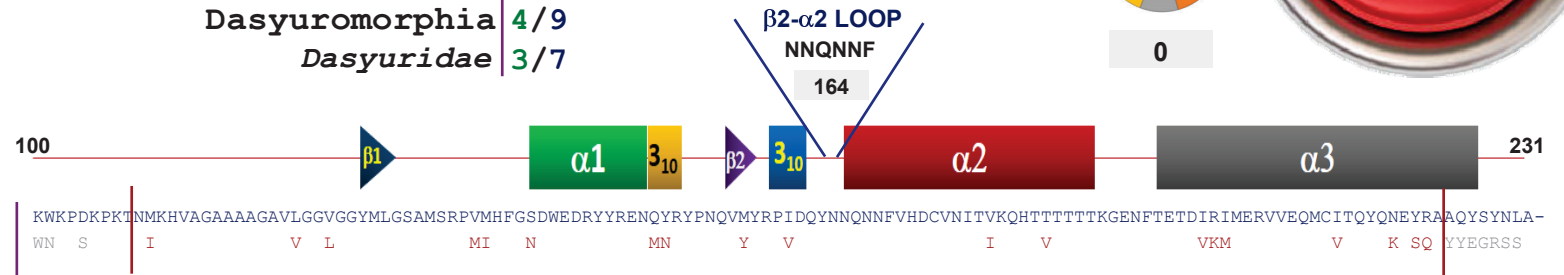

PrP sequence differs by 19 amino acids from the bank vole PrP (see in red)

- No deletions
- No insertions
- No polymorphic variants found

Tm<sup>Exp</sup>: ND

ΔΔG: ND

Distinct primary sequence across species

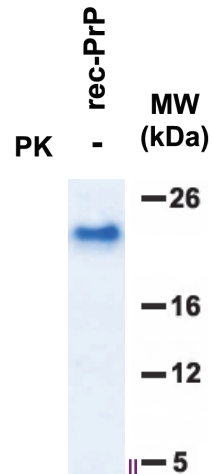

218 AA

0  
Conformers

**NO  
MISFOLDING**

*In vitro* studies

**NOT  
APPLICABLE**

*In vivo* studies

**NOT  
APPLICABLE**

pLDDT  
[92.82]

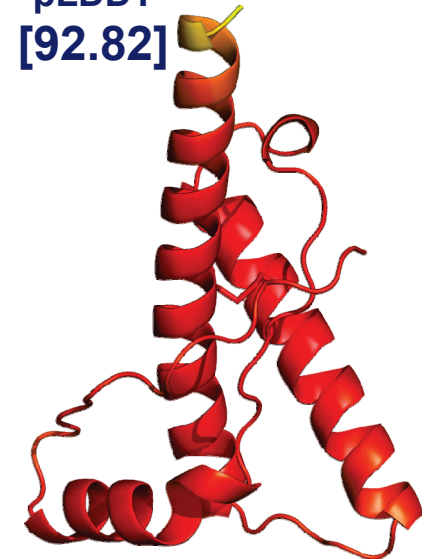



# Northern quoll

GenBank: **BK064760**

P45%



0-10

## *Dasyurus hallucatus*

Dasyuromorphia 4/9

Dasyuridae 3/7

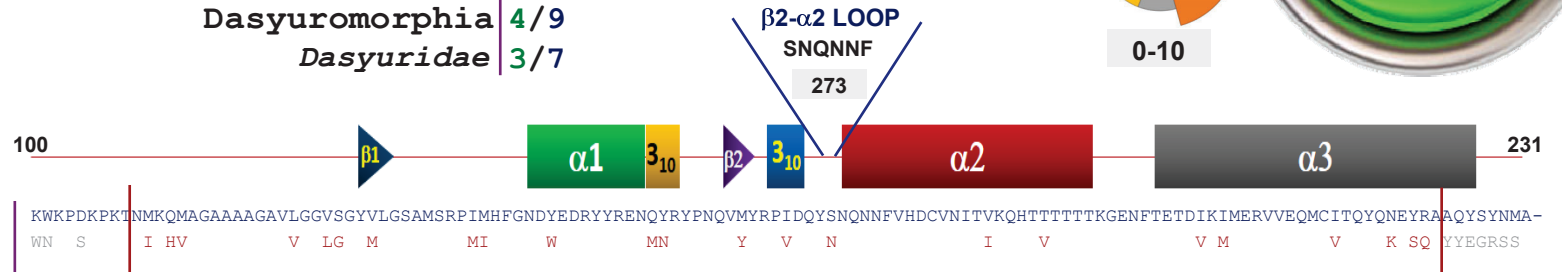

PrP sequence differs by 23 amino acids from the bank vole PrP (see in red)

No deletions  
No insertions  
No polymorphic variants found

Distinct primary sequence across species

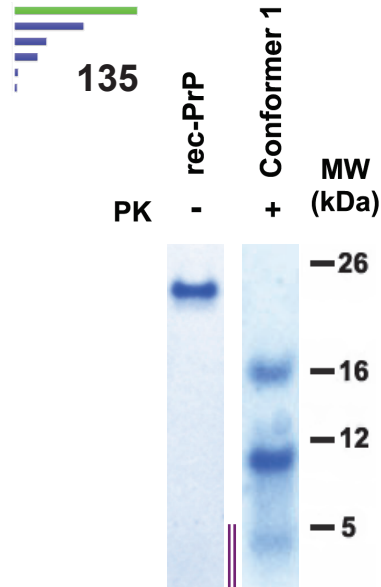

228 AA

1  
Conformers

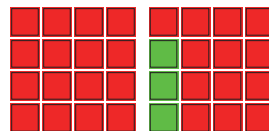

$T_m^{Exp}$ : ND  
 $\Delta\Delta G$ : ND

### *In vitro* studies

TgVole (1x) Not tested  
Northern quoll Not tested

### *In vivo* studies

TgVole (1x) Not tested  
Northern quoll Not tested

pLDDT  
[91.53]

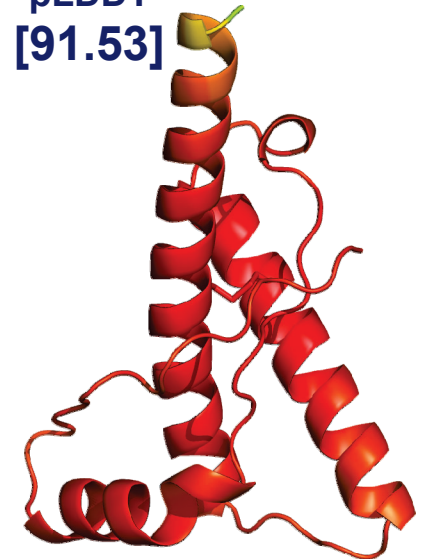

# Eastern quoll

GenBank: **BK064810**

P35%

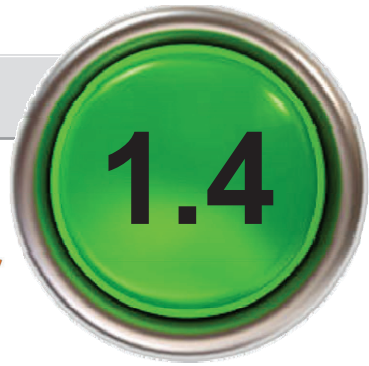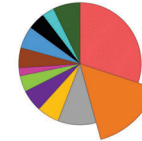

0-10

## *Dasyurus viverrinus*

Dasyuromorphia 4/9

Dasyuridae 3/7

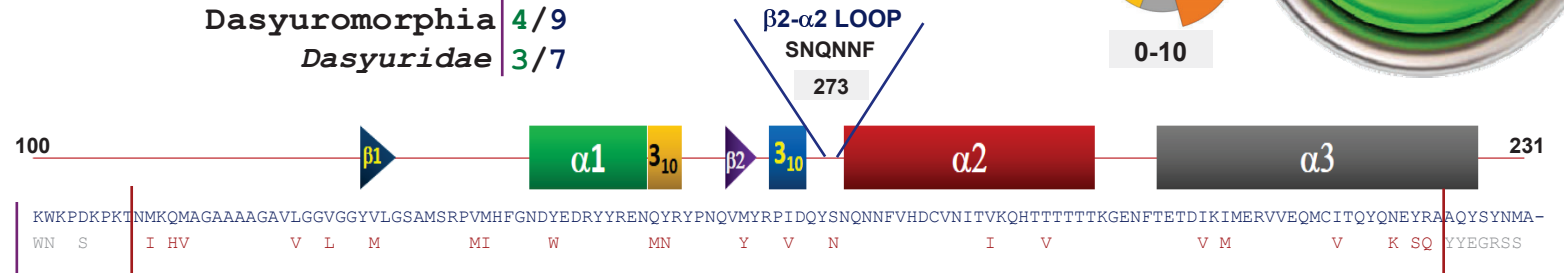

PrP sequence differs by 22 amino acids from the bank vole PrP (see in red)

No deletions  
No insertions  
No polymorphic variants found

Distinct primary sequence across species

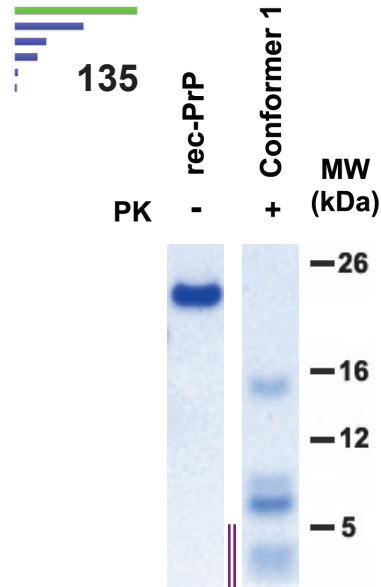

218 AA

1  
Conformers

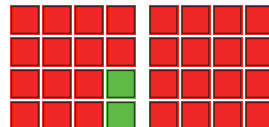

Tm<sup>Exp</sup>: ND  
 $\Delta\Delta G$ : ND

### *In vitro* studies

TgVole (1x) Not tested

Eastern quoll Not tested

### *In vivo* studies

TgVole (1x) Not tested

Eastern quoll Not tested

pLDDT  
[91.97]

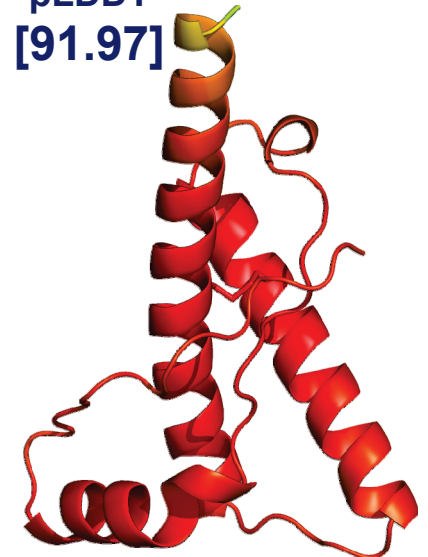

Distinct primary sequence across species

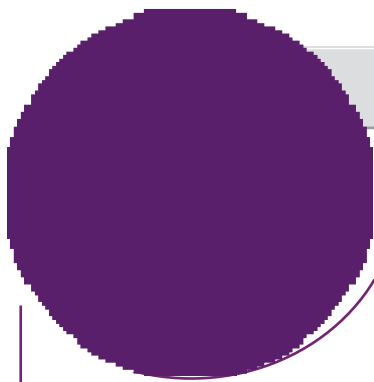

# Numbat

GenBank: **BK064811**

P29%

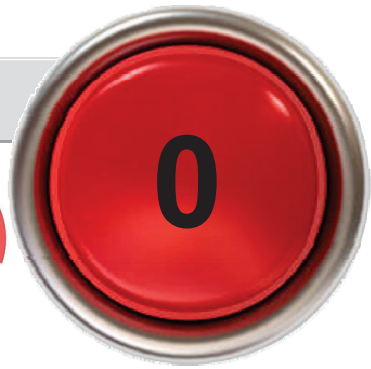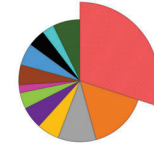

0

## *Myrmecobius fasciatus*

Dasyuromorphia 4/9

Myrmecobiidae 0/1

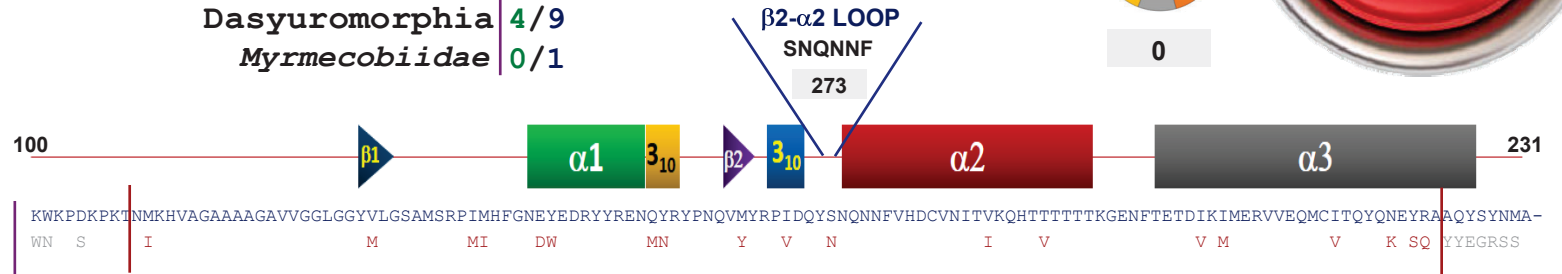

PrP sequence differs by 19 amino acids from the bank vole PrP (see in red)

- No deletions
- No insertions
- No polymorphic variants found

Tm<sup>Exp</sup>: ND

$\Delta\Delta$ G: ND

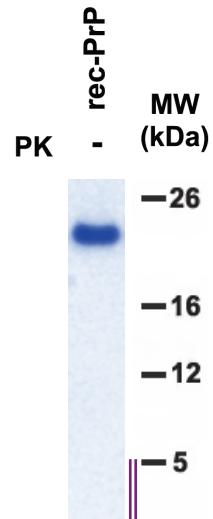

213 AA

0  
Conformers

**NO MISFOLDING**

*In vitro* studies

**NOT APPLICABLE**

*In vivo* studies

**NOT APPLICABLE**

pLDDT [92.19]

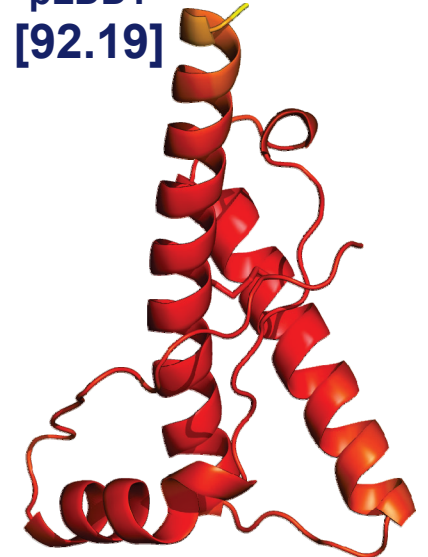

# Brush-tailed phascogale

GenBank: **BK064816**

## *Phascogale tapoatafa*

Dasyuromorphia 4/9  
Dasyuridae 3/7

P29%

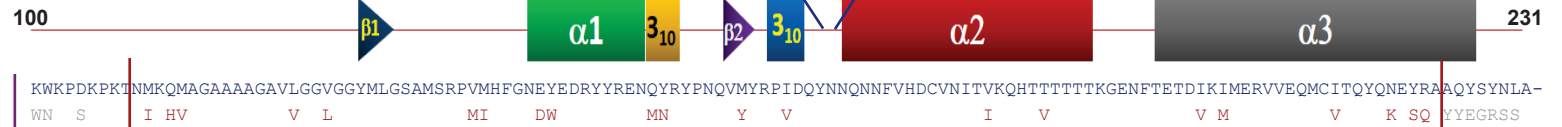

PrP sequence differs by 21 amino acids from the bank vole PrP (see in red)

- No deletions
- No insertions
- No polymorphic variants found

Tm<sup>Exp</sup>: ND  
ΔΔG: ND

1 species sharing the same primary sequence

Red-tailed phascogale  
*Phascogale calura*

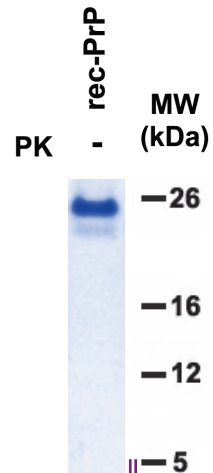

228 AA

0 Conformers

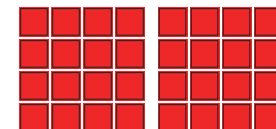

**NO MISFOLDING**

*In vitro* studies

**NOT APPLICABLE**

*In vivo* studies

**NOT APPLICABLE**

pLDDT [92.71]

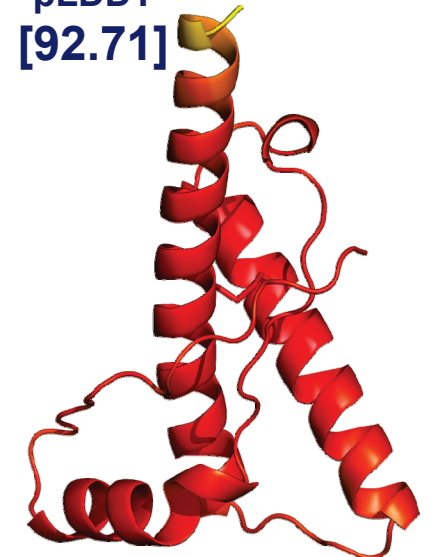

# Tasmanian devil

GenBank: XM\_003757949

P29%



0

## *Sarcophilus harrisii*

Dasyuromorphia 4/9

Dasyuridae 3/7

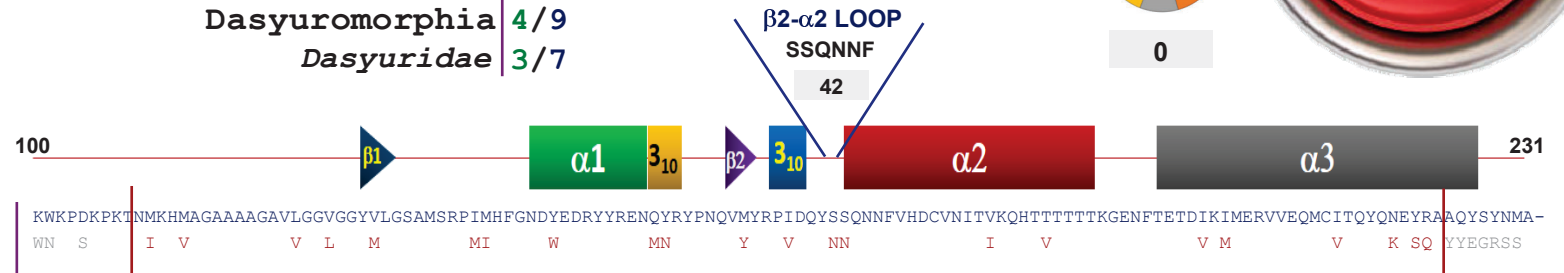

PrP sequence differs by 22 amino acids from the bank vole PrP (see in red)

- No deletions
- No insertions
- No polymorphic variants found

Tm<sup>Exp</sup>: ND

ΔΔG: ND

Distinct primary sequence across species

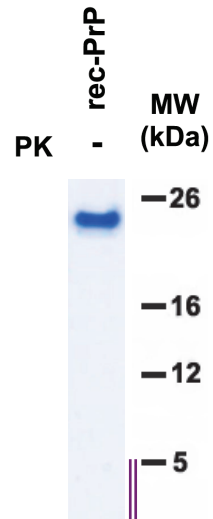

218 AA

0  
Conformers

**NO  
MISFOLDING**

 *In vitro* studies

**NOT  
APPLICABLE**

 *In vivo* studies

**NOT  
APPLICABLE**

pLDDT  
[90.1]

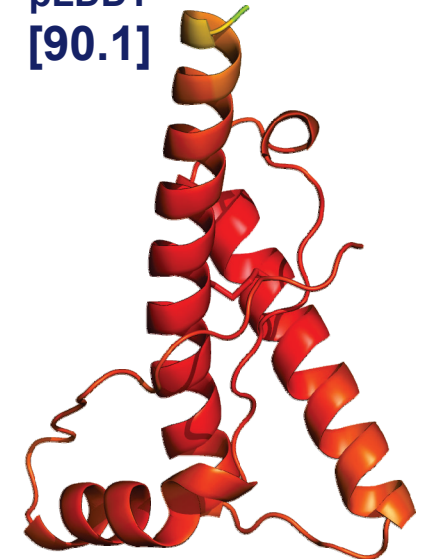

# Fat-tailed dunnart

GenBank: **BK064171**

P55%

19.6



## *Sminthopsis crassicaudata*

Dasyuromorphia 4/9

Dasyuridae 3/7

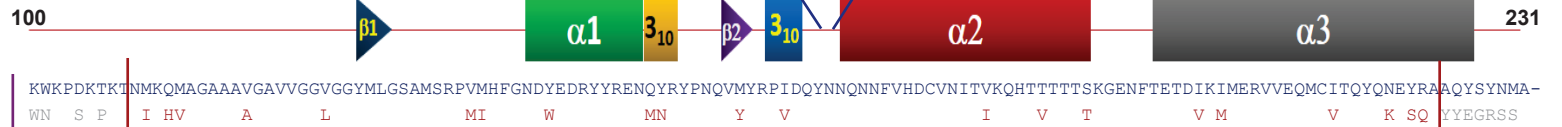

PrP sequence differs by 21 amino acids from the bank vole PrP (see in red)

No deletions  
No insertions  
No polymorphic variants found

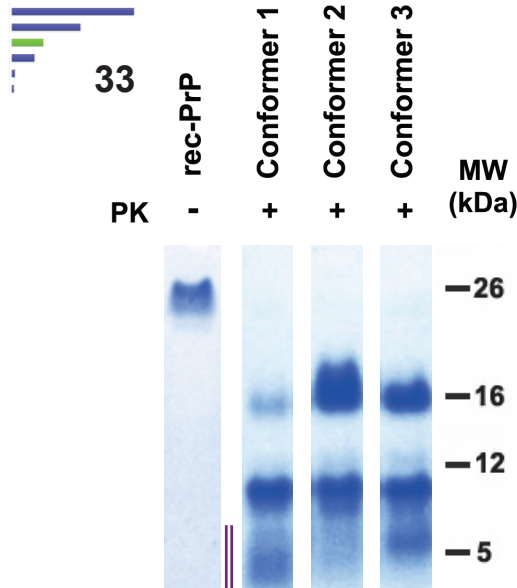

228 AA

3  
Conformers

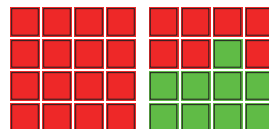

Tm<sup>Exp</sup>: ND  
ΔΔG: ND

### *In vitro* studies

TgVole (1x) Not tested  
Fat-tailed dunnart Not tested

### *In vivo* studies

TgVole (1x) Not tested  
Fat-tailed dunnart Not tested

pLDDT [92.93]

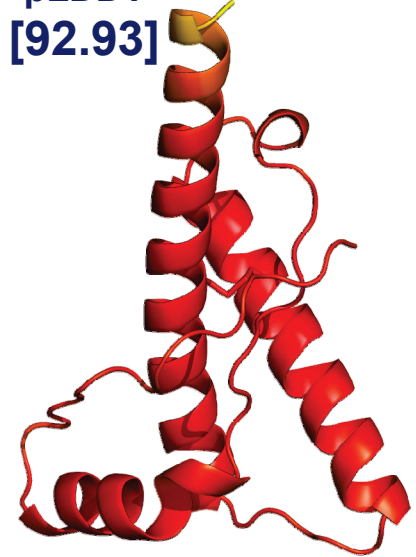

Distinct primary sequence across species

# Thylacine

GenBank: **BK064189**

P39%



0-10

## *Thylacinus cynocephalus*

Dasyuromorphia 4/9

Thylacinidae 1/1

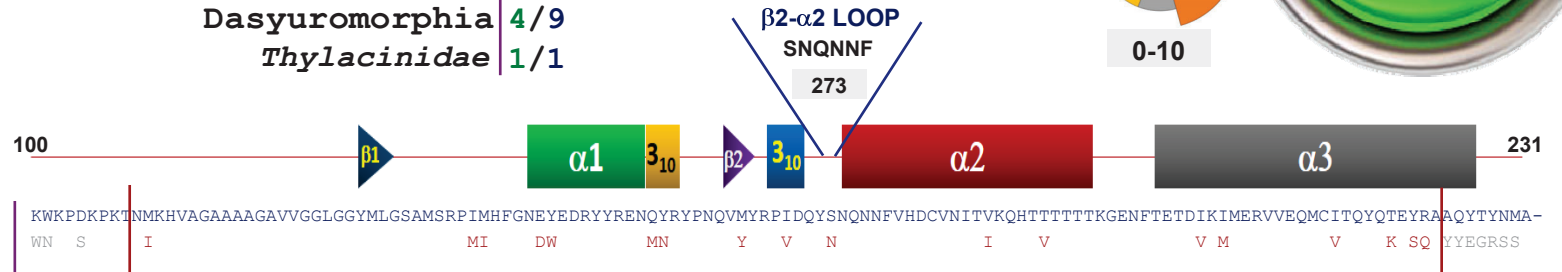

PrP sequence differs by 18 amino acids from the bank vole PrP (see in red)

No deletions  
No insertions  
No polymorphic variants found

Distinct primary sequence across species

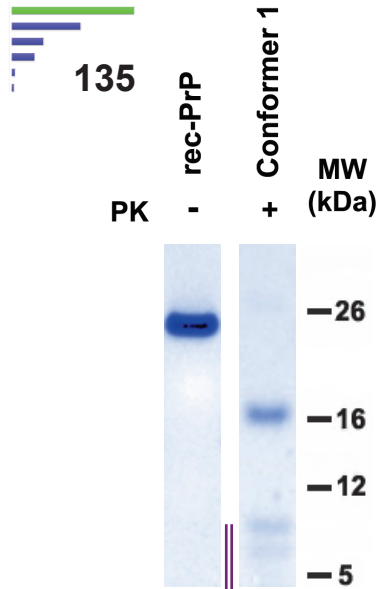

208 AA

1

Conformers



$T_m^{Exp}$ : ND

$\Delta\Delta G$ : ND

### *In vitro* studies

TgVole (1x) Ongoing

Thylacine Not tested

### *In vivo* studies

TgVole (1x) Ongoing

Thylacine Not tested

pLDDT  
[91.45]

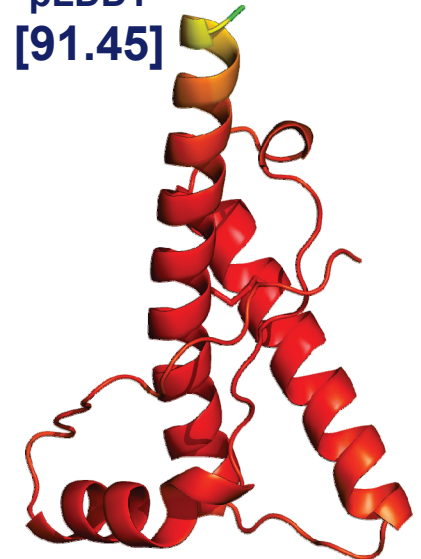

# Sunda flying lemur

GenBank: AY133034

P35%

1.8

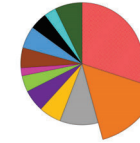

0-10

## *Galeopterus variegatus*

Dermoptera 1/1

Cynocephalidae 1/1

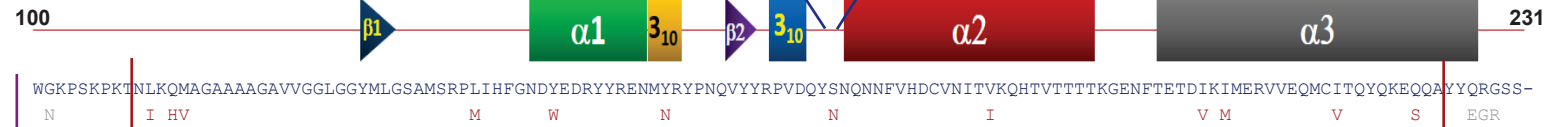

PrP sequence differs by 12 amino acids from the bank vole PrP (see in red)

- No deletions
- No insertions
- No polymorphic variants found

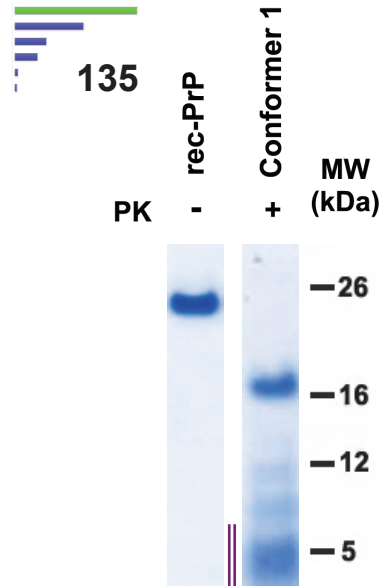

212 AA

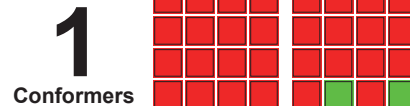

Tm<sup>Exp</sup>: ND

$\Delta\Delta$ G: -8.07

### *In vitro* studies

**No propagation**  
TgVole (1x)

Not tested  
Sunda flying lemur

### *In vivo* studies

Ongoing  
TgVole (1x)

Not tested  
Sunda flying lemur

pLDDT  
[85.82]

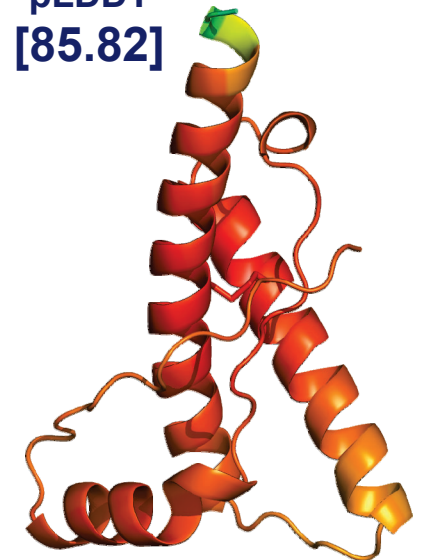

1 species sharing the same primary sequence

Philippine flying lemur  
*Cynocephalus volans*



# Virginia opossum

GenBank: **BK064768**

P29%



0

## *Didelphis virginiana*

Didelphimorphia 2/3

Didelphidae 2/3

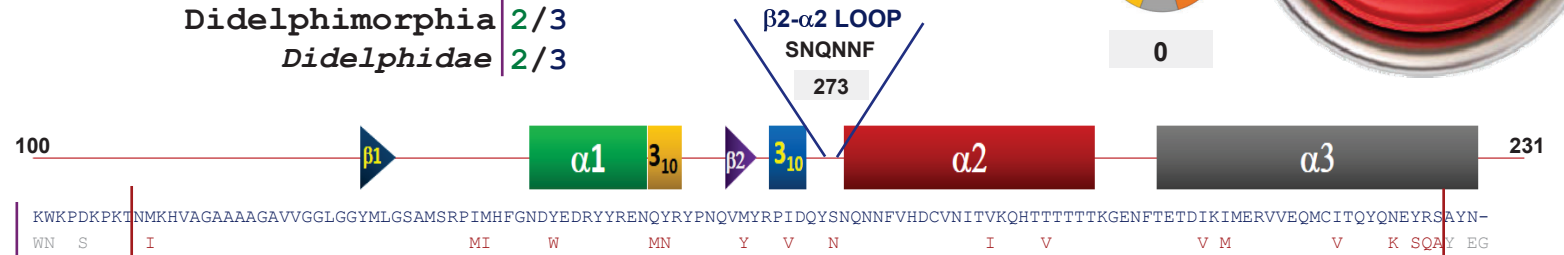

PrP sequence differs by 18 amino acids from the bank vole PrP (see in red)

- No deletions
- No insertions
- No polymorphic variants found

Tm<sup>Exp</sup>: ND

ΔΔG: ND

Distinct primary sequence across species

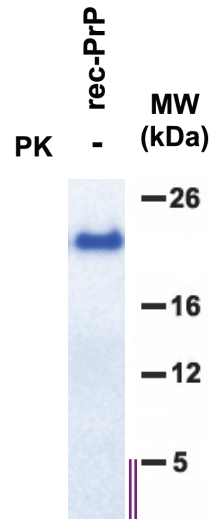

215 AA

0  
Conformers

**NO  
MISFOLDING**

 *In vitro* studies

**NOT  
APPLICABLE**

 *In vivo* studies

**NOT  
APPLICABLE**

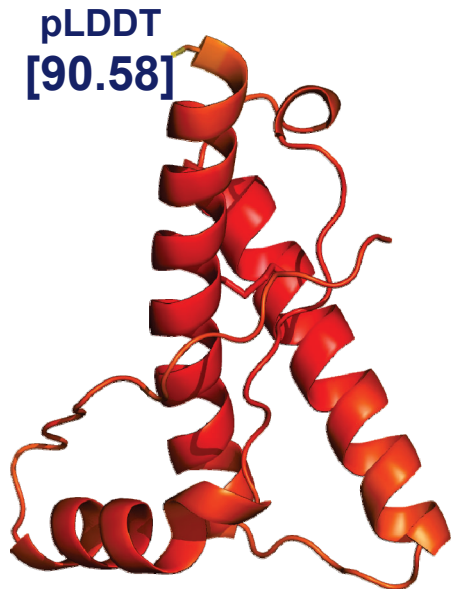

# Agile gracile opossum

GenBank: **BK063958**

P57%

22.9



20-30

## Gracilinanus agilis

Didelphimorphia 2/3

Didelphidae 2/3

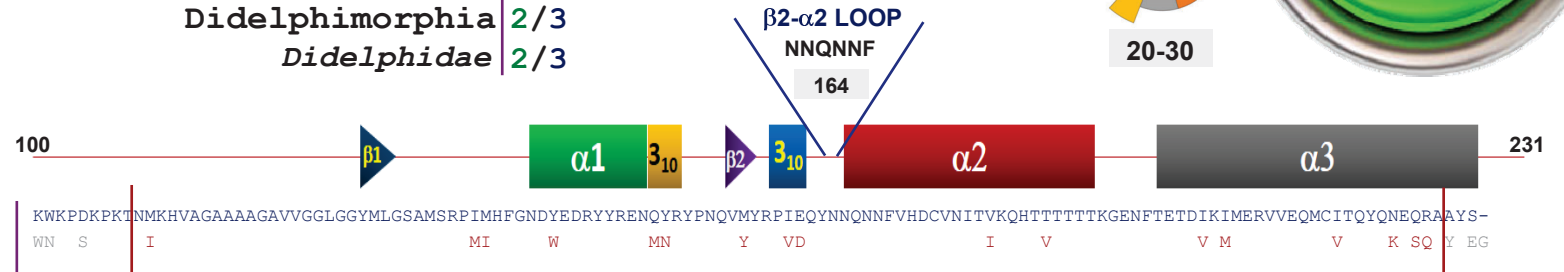

PrP sequence differs by 17 amino acids from the bank vole PrP (see in red)

No deletions  
No insertions  
No polymorphic variants found

Distinct primary sequence across species

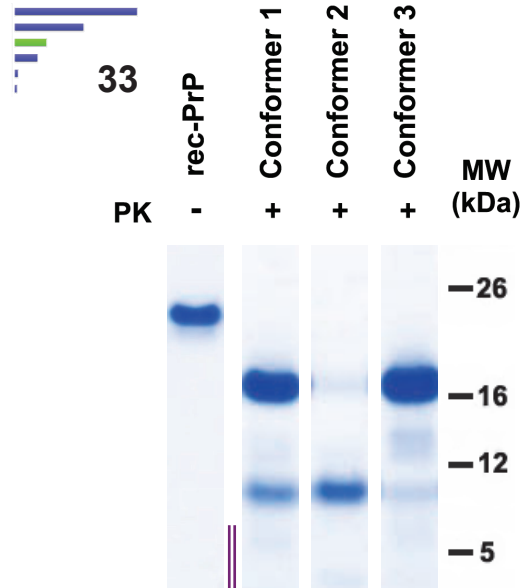

214 AA

3  
Conformers

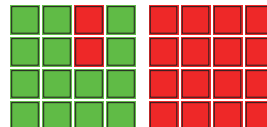

$T_m^{Exp}$ : ND  
 $\Delta\Delta G$ : ND

### In vitro studies

TgVole (1x) Ongoing  
Agile gracile opossum Not tested

### In vivo studies

TgVole (1x) Ongoing  
Agile gracile opossum Not tested

pLDDT  
[87.25]

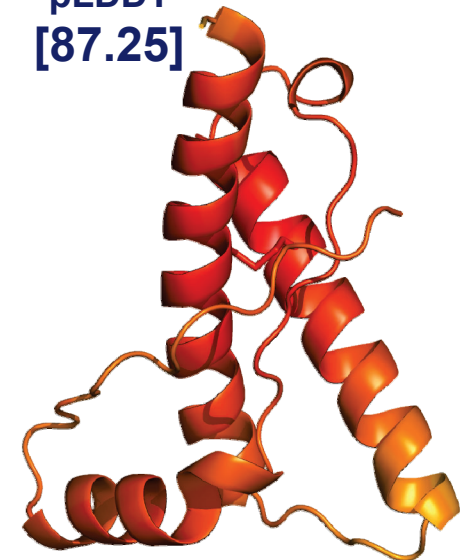

# Opossum

GenBank: NM\_001040028

P39%

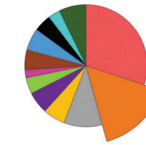

0-10

## Monodelphis domestica

Didelphimorphia 2/3

Didelphidae 2/3

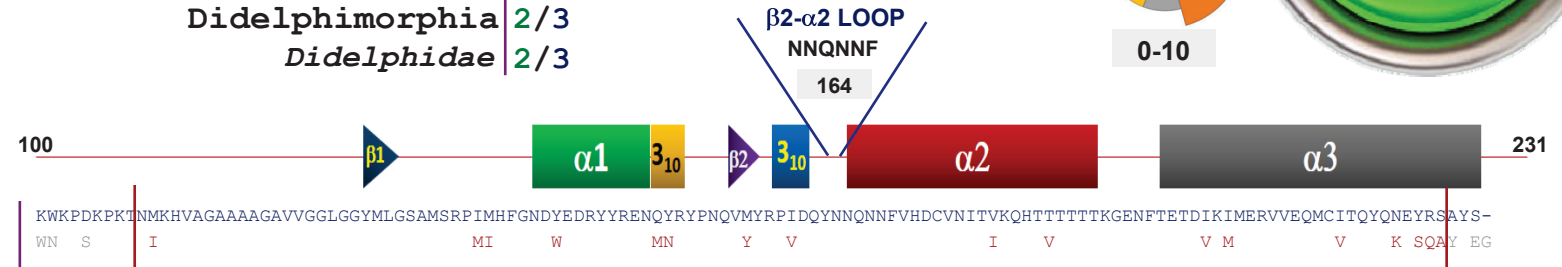

PrP sequence differs by 17 amino acids from the bank vole PrP (see in red)

No deletions  
No insertions  
It shows polymorphic variants

Distinct primary sequence across species

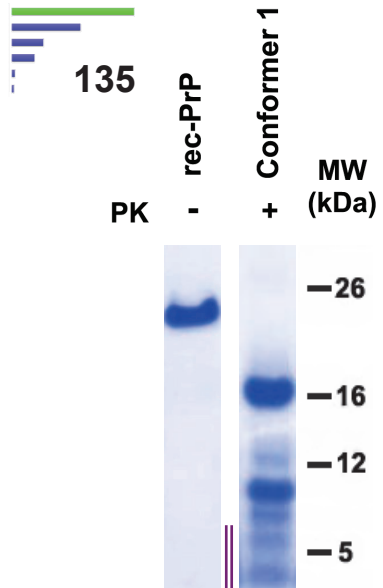

215 AA

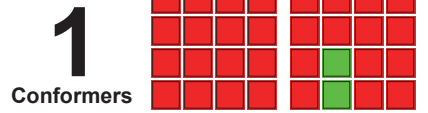

Tm<sup>Exp</sup>: ND  
ΔΔG: ND

### In vitro studies

**No propagation**  
TgVole (1x)  
Opossum Not tested

### In vivo studies

**Non infectious**  
TgVole (1x)  
Opossum Not tested

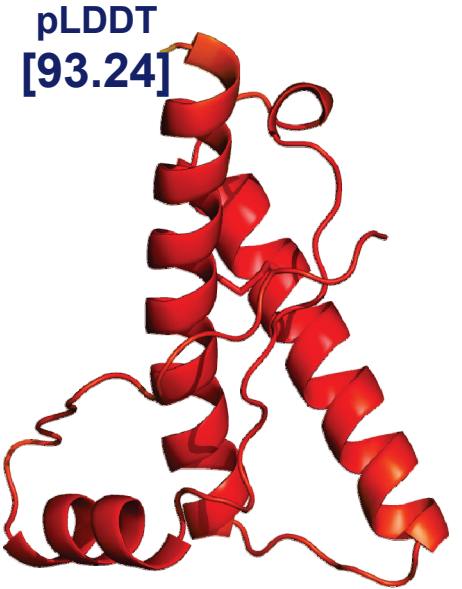

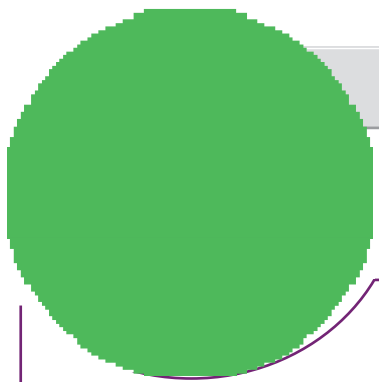

# Woylie

GenBank: **BK064808**

P45%

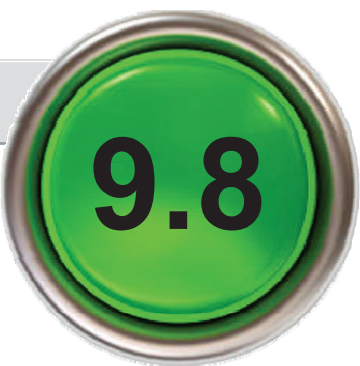

## Bettongia penicillata ogilbyi

Diprotodontia 9/18

Potoroidae 1/2

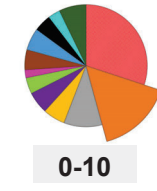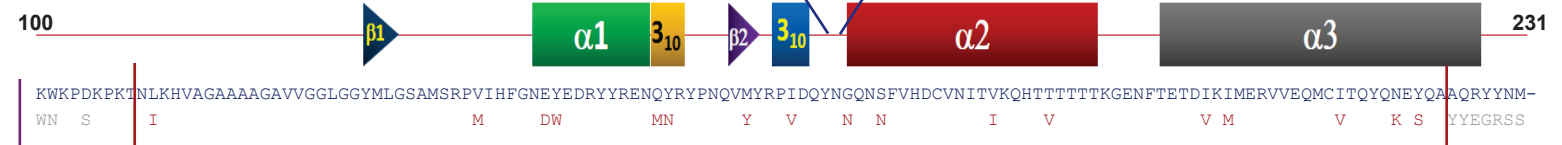

PrP sequence differs by 17 amino acids from the bank vole PrP (see in red)

- No deletions
- No insertions
- No polymorphic variants found

Distinct primary sequence across species

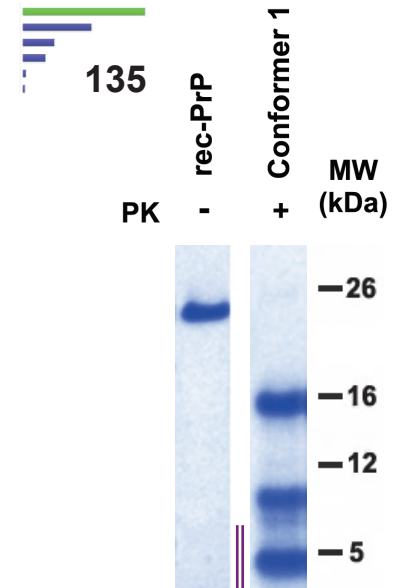

216 AA

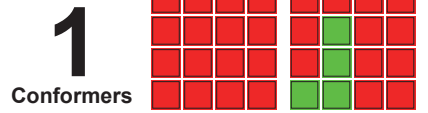

Tm<sup>Exp</sup>: ND  
ΔΔG: ND

### In vitro studies

|             |            |
|-------------|------------|
| TgVole (1x) | Not tested |
| Woylie      | Not tested |

### In vivo studies

|             |            |
|-------------|------------|
| TgVole (1x) | Not tested |
| Woylie      | Not tested |

pLDDT [92.82]

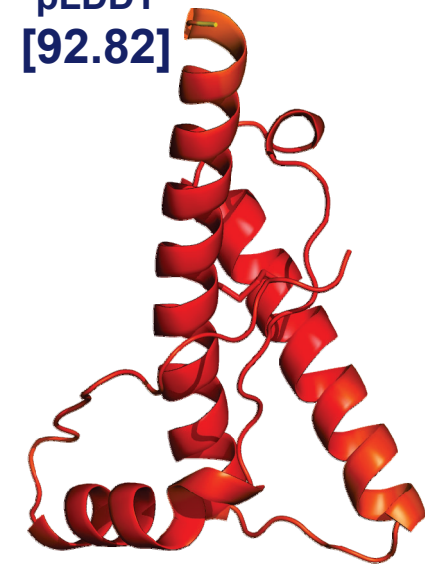

# Western pygmy possum

GenBank: **BK064813**

P46%

10.7

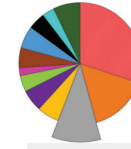

## *Cercartetus concinnus*

Diprotodontia 9/18

Burramyidae 1/1

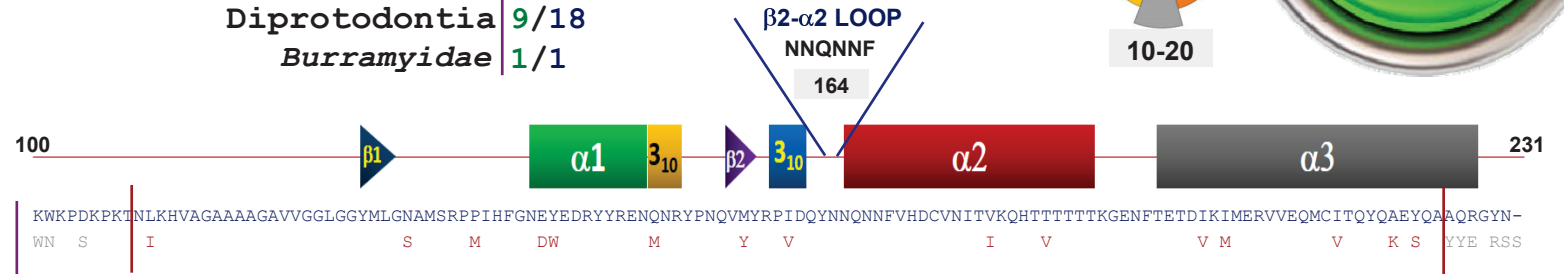

PrP sequence differs by 15 amino acids from the bank vole PrP (see in red)

- No deletions
- No insertions
- No polymorphic variants found

Distinct primary sequence across species

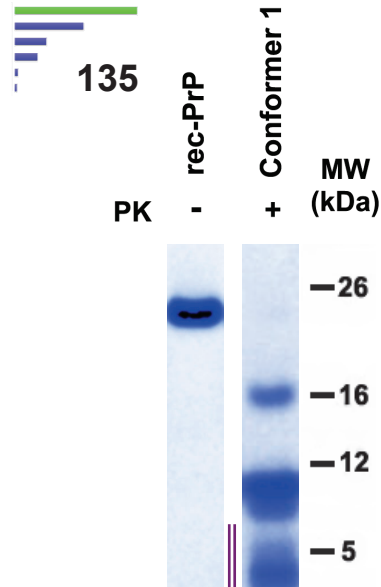

212 AA

1  
Conformers

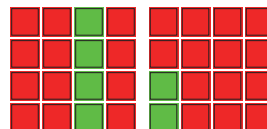

Tm<sup>Exp</sup>: ND

ΔΔG: ND

### *In vitro* studies

TgVole (1x) **Propagate**

Western pygmy possum **Not tested**

### *In vivo* studies

TgVole (1x) **Infectious**

Western pygmy possum **Not tested**

pLDDT  
[86.86]

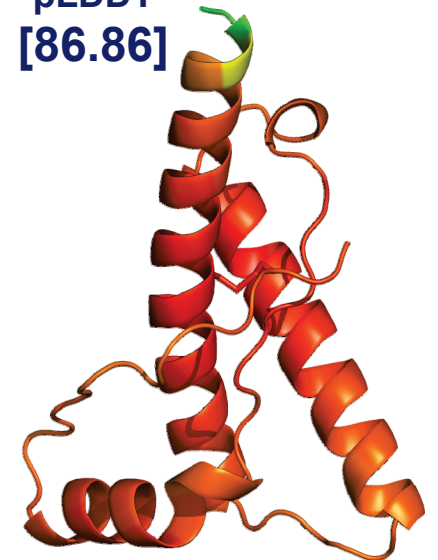

# Matschie's tree-kangaroo

GenBank: **BK064823**

P29%



0

## *Dendrolagus matschiei*

Diprotodontia 9/18

Macropodidae 1/7

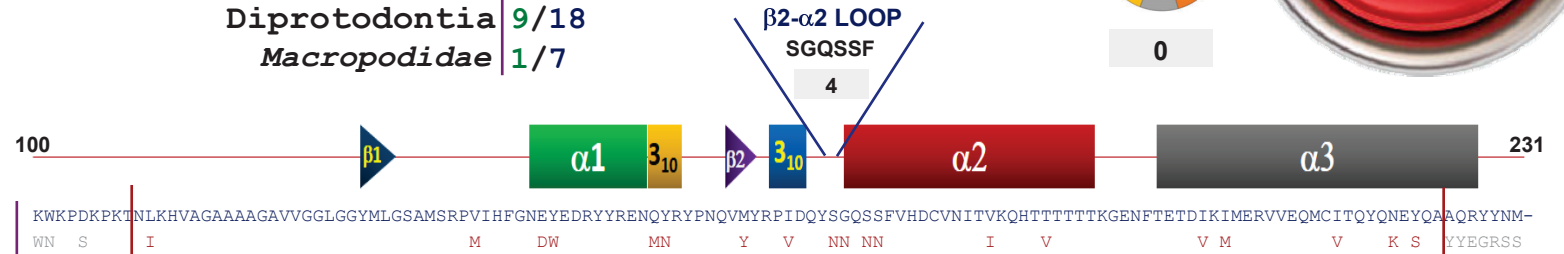

PrP sequence differs by 19 amino acids from the bank vole PrP (see in red)

- No deletions
- No insertions
- No polymorphic variants found

Tm<sup>Exp</sup>: ND

ΔΔG: **-23.84**

Distinct primary sequence across species

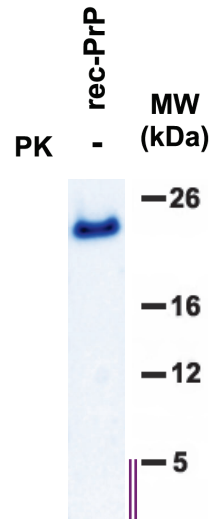

216 AA

0  
Conformers

**NO  
MISFOLDING**

*In vitro* studies

**NOT  
APPLICABLE**

*In vivo* studies

**NOT  
APPLICABLE**

pLDDT  
[94.09]

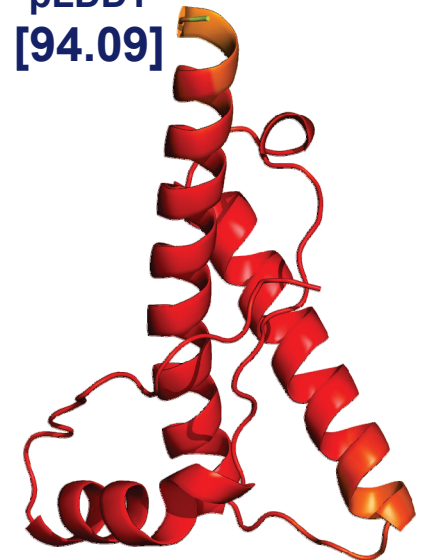

# Leadbeater's possum

GenBank: **BK064074**

P74%

60.2

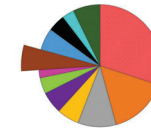

60-70

## *Gymnobelideus leadbeateri*

Diprotodontia 9/18

Petauridae 1/2

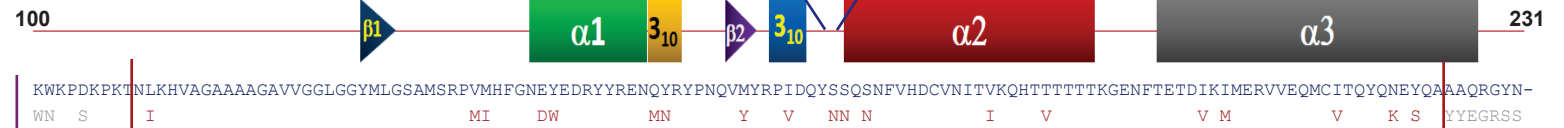

PrP sequence differs by 19 amino acids from the bank vole PrP (see in red)

No deletions  
No insertions  
No polymorphic variants found

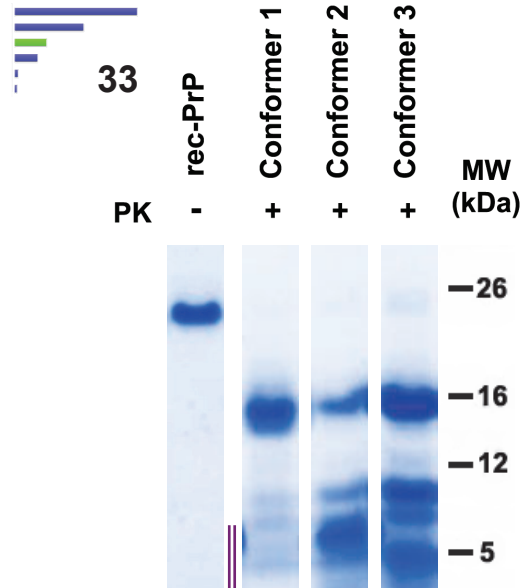

215 AA

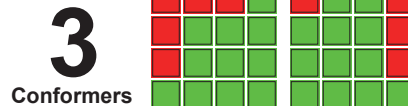

$T_m^{Exp}$ : ND

$\Delta\Delta G$ : ND

### *In vitro* studies

TgVole (1x) Not tested

Leadbeater's possum Not tested

### *In vivo* studies

TgVole (1x) Not tested

Leadbeater's possum Not tested

pLDDT  
[89.44]

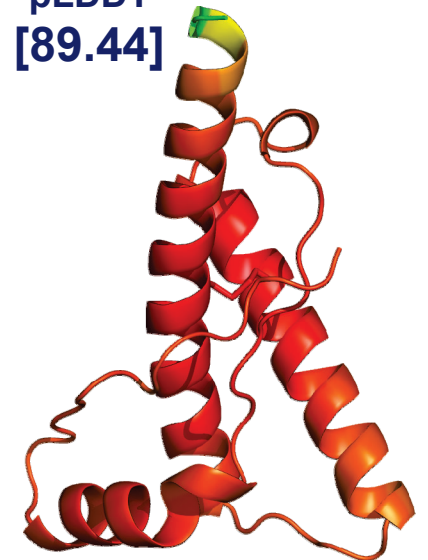

Distinct primary sequence across species

# Rufous hare-wallaby

GenBank: **BK064777**

P48%

12.5

## Lagorchestes hirsutus

Diprotodontia 9/18

Macropodidae 1/7

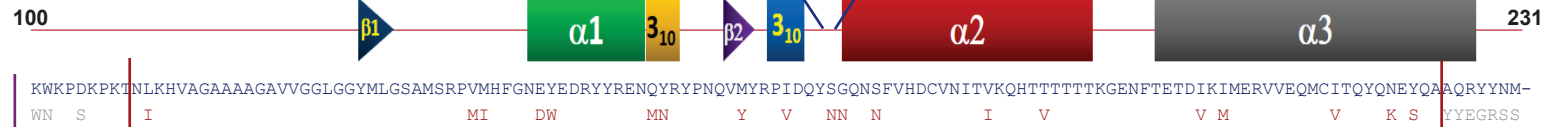

PrP sequence differs by 19 amino acids from the bank vole PrP (see in red)

No deletions  
No insertions  
No polymorphic variants found

Distinct primary sequence across species

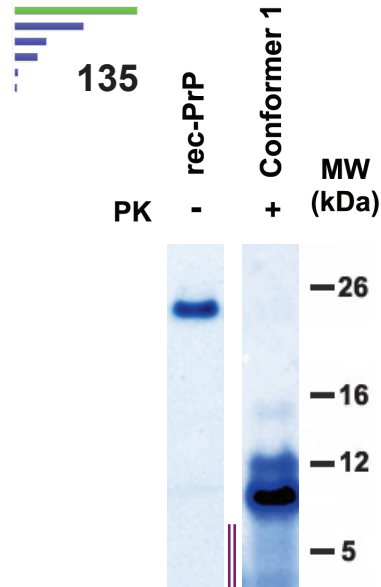

216 AA

1

Conformers

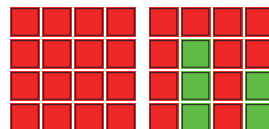

$T_m^{Exp}$ : ND

$\Delta\Delta G$ : ND

### *In vitro* studies

TgVole (1x) Not tested

Rufous hare-wallaby Not tested

### *In vivo* studies

TgVole (1x) Not tested

Rufous hare-wallaby Not tested

pLDDT  
[92.38]

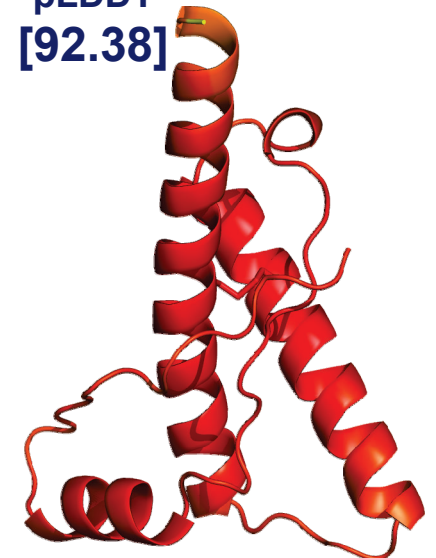



# Wallaby

GenBank: AY659988

P29%

0

## *Macropus eugenii*

Diprotodontia 9/18

Macropodidae 1/7



0

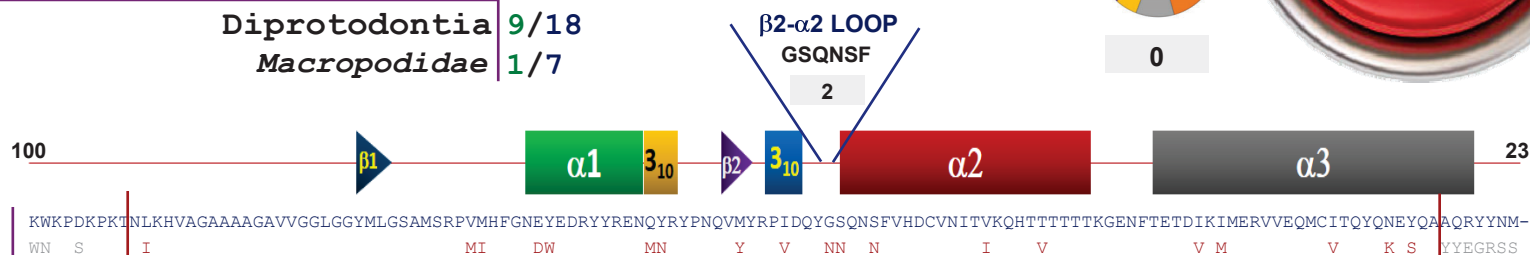

PrP sequence differs by 19 amino acids from the bank vole PrP (see in red)

- No deletions
- No insertions
- No polymorphic variants found

Tm<sup>Exp</sup>: ND

ΔΔG: ND

2 species sharing the same primary sequence

Western Brush Wallaby  
*Macropus irma*

Red-necked wallaby  
*Macropus rufogriseus*

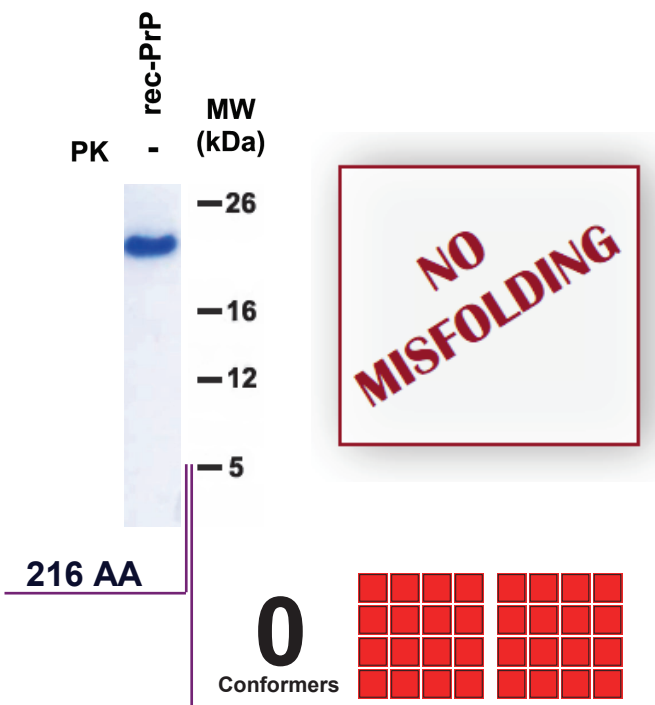

*In vitro* studies

NOT APPLICABLE

*In vivo* studies

NOT APPLICABLE

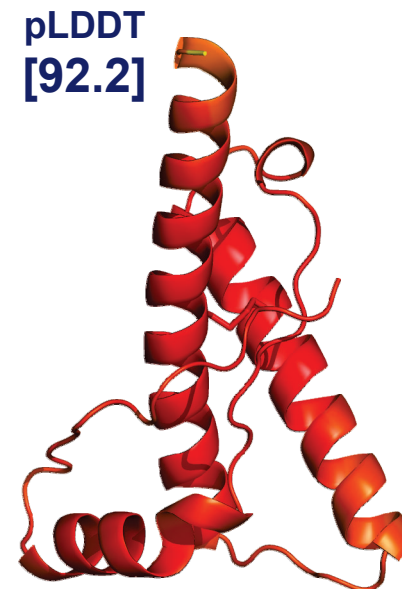

1 species sharing the same primary sequence

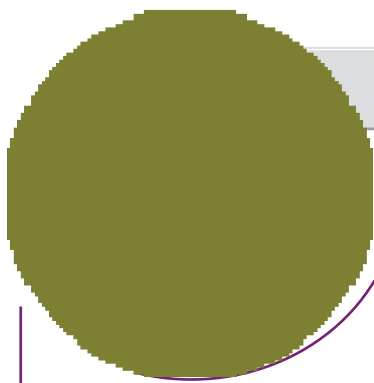

# Eastern grey kangaroo

GenBank: **BK064781**

*Macropus giganteus*

Diprotodontia 9/18

Macropodidae 1/7

P29%



0



Western grey kangaroo  
*Macropus fuliginosus*

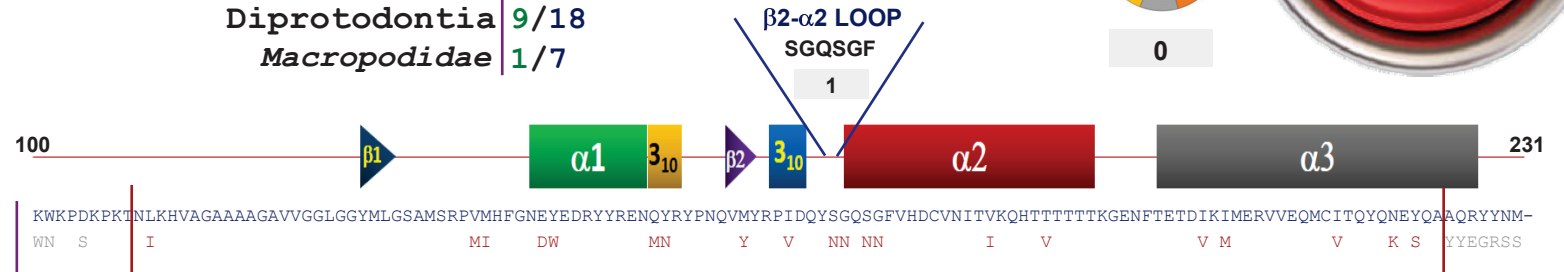

PrP sequence differs by 20 amino acids from the bank vole PrP (see in red)

- No deletions
- No insertions
- No polymorphic variants found

$T_m^{Exp}$ : ND

$\Delta\Delta G$ : ND

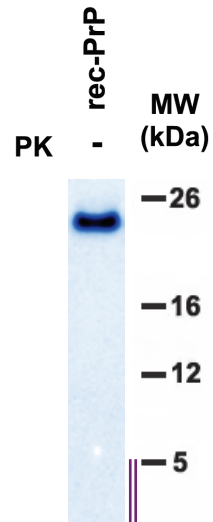

216 AA

0  
Conformers

**NO MISFOLDING**

*In vitro* studies

**NOT APPLICABLE**

*In vivo* studies

**NOT APPLICABLE**

pLDDT [92.16]

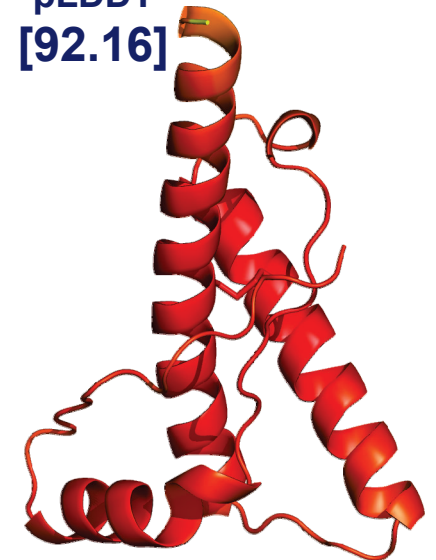

# Red kangaroo

GenBank: **OR47271**

P29%



0

## Macropus rufus

Diprotodontia 9/18

Macropodidae 1/7

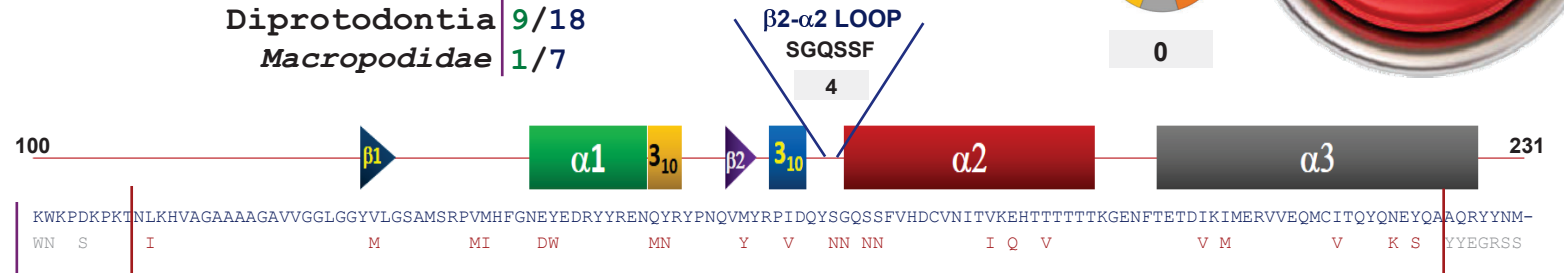

PrP sequence differs by 22 amino acids from the bank vole PrP (see in red)

- No deletions
- No insertions
- No polymorphic variants found

$T_m^{Exp}$ : ND

$\Delta\Delta G$ : ND

Distinct primary sequence across species

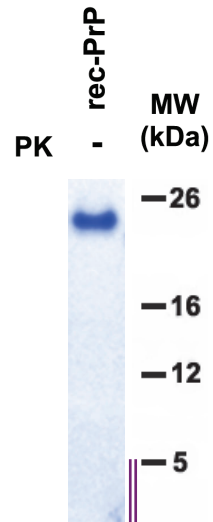

216 AA

0  
Conformers

**NO  
MISFOLDING**

*In vitro* studies

**NOT  
APPLICABLE**

*In vivo* studies

**NOT  
APPLICABLE**

pLDDT  
[91.7]

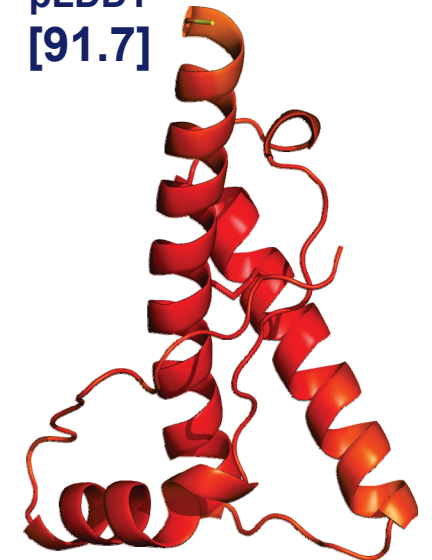

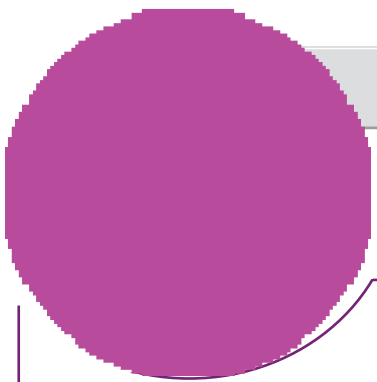

# Sugar glider

GenBank: **BK064219**

P39%

3.6



0-10

## *Petaurus breviceps*

Diprotodontia 9/18

*Petauridae* 1/2

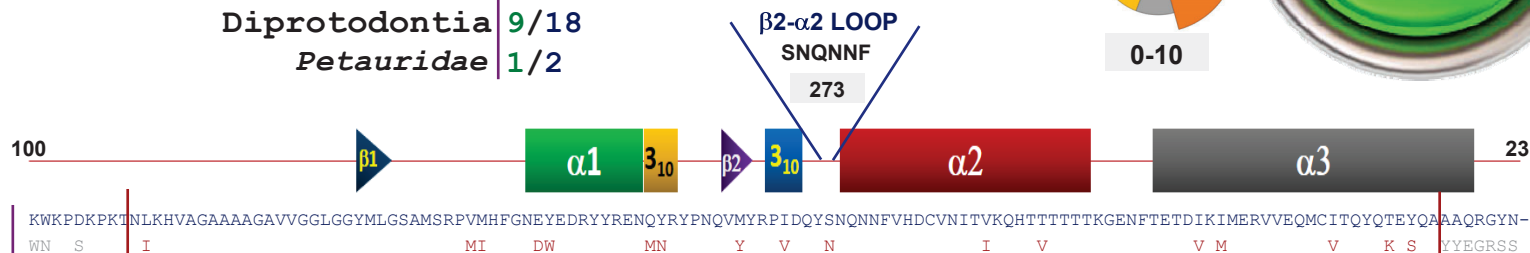

PrP sequence differs by 17 amino acids from the bank vole PrP (see in red)

- No deletions
- No insertions
- No polymorphic variants found

Distinct primary sequence across species

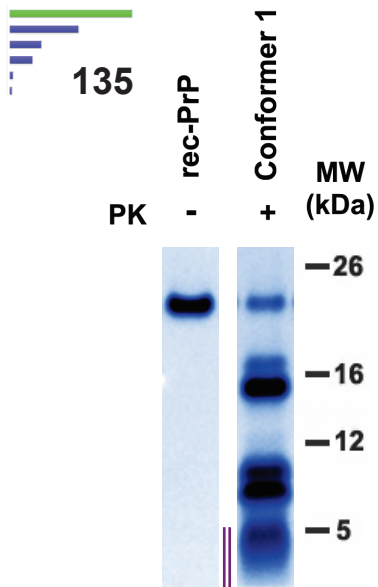

216 AA

1 Conformers

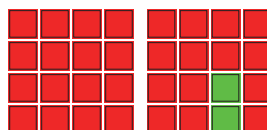

Tm<sup>Exp</sup>: ND

ΔΔG: -22.28

### *In vitro* studies

- TgVole (1x) Not tested
- Sugar glider Not tested

### *In vivo* studies

- TgVole (1x) Not tested
- Sugar glider Not tested

pLDDT [93.64]

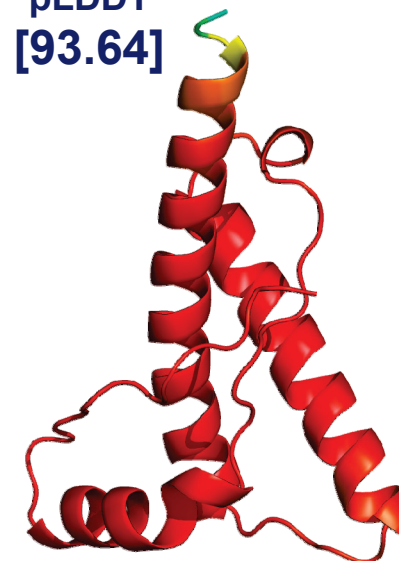

# Yellow-footed rock-wallaby

GenBank: **OR47266**

P29%



0

## *Petrogale xanthopus*

Diprotodontia 9/18

Macropodidae 1/7

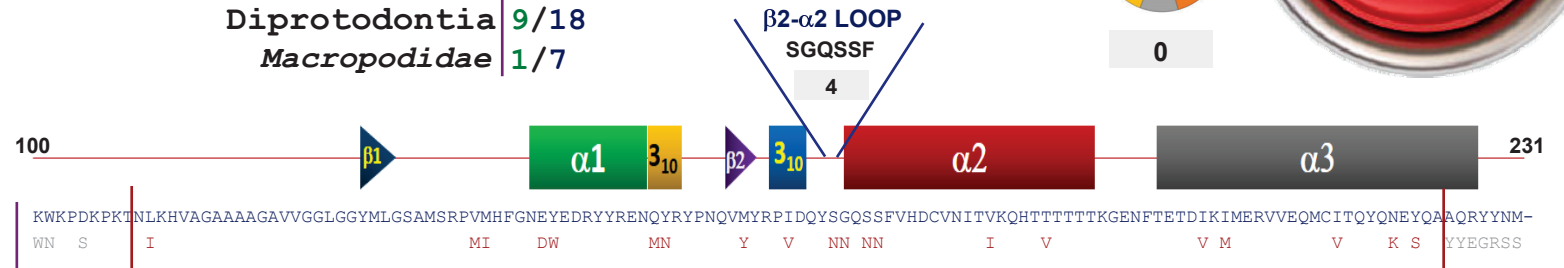

PrP sequence differs by 20 amino acids from the bank vole PrP (see in red)

- No deletions
- No insertions
- No polymorphic variants found

Tm<sup>Exp</sup>: ND

$\Delta\Delta G$ : ND

1 species sharing the same primary sequence

Swamp wallaby  
*Wallabia bicolor*

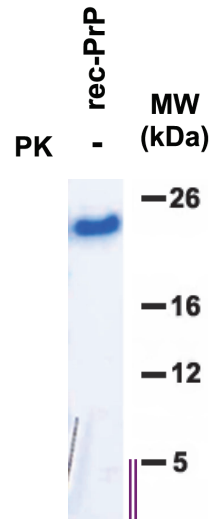

216 AA

0  
Conformers

**NO MISFOLDING**

*In vitro* studies

**NOT APPLICABLE**

*In vivo* studies

**NOT APPLICABLE**

pLDDT [92.57]

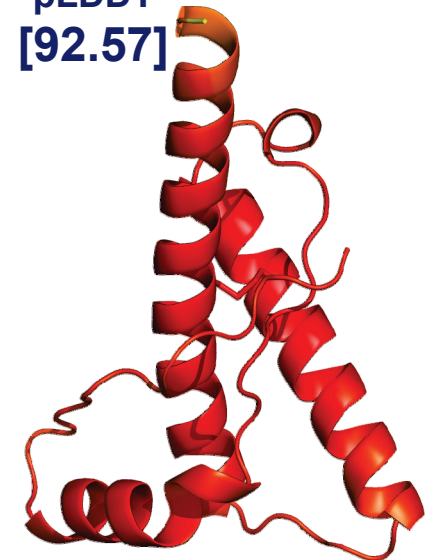

Distinct primary sequence across species

# Ground cuscus

GenBank: **BK064791**

**P60%**

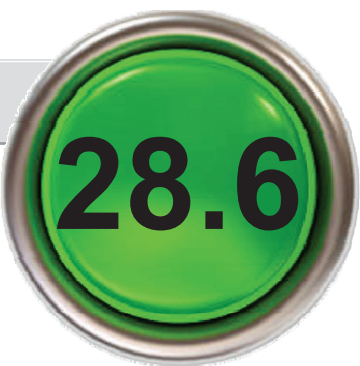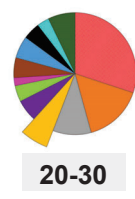

20-30

## *Phalanger gymnotis*

Diprotodontia 9/18

Phalangeridae 2/2

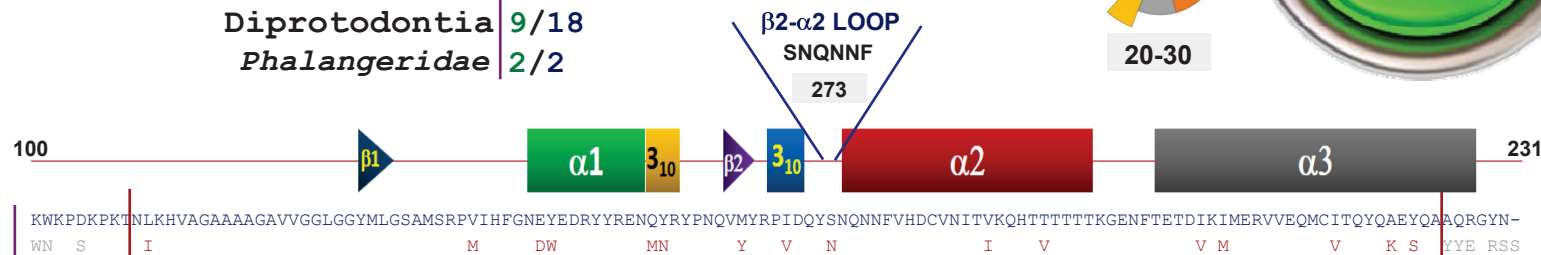

PrP sequence differs by 16 amino acids from the bank vole PrP (see in red)

- No deletions
- No insertions
- No polymorphic variants found

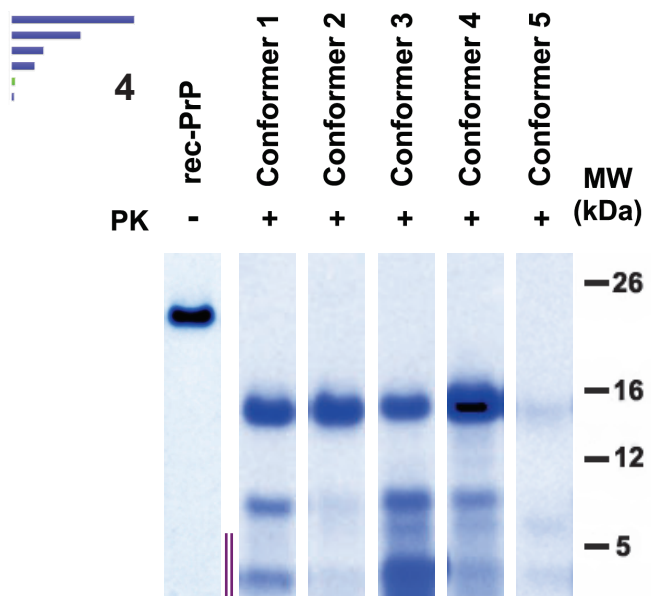

213 AA

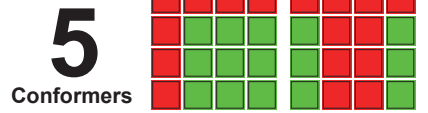

Tm<sup>Exp</sup>: ND  
ΔΔG: ND

### *In vitro* studies

|               |            |
|---------------|------------|
| TgVole (1x)   | Not tested |
| Ground cuscus | Not tested |

### *In vivo* studies

|               |            |
|---------------|------------|
| TgVole (1x)   | Not tested |
| Ground cuscus | Not tested |

pLDDT [89.54]

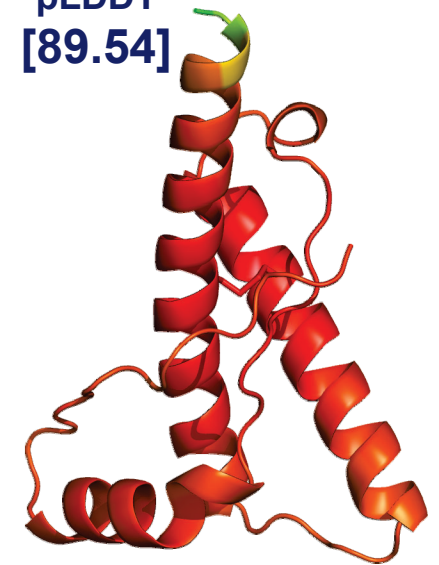

Distinct primary sequence across species

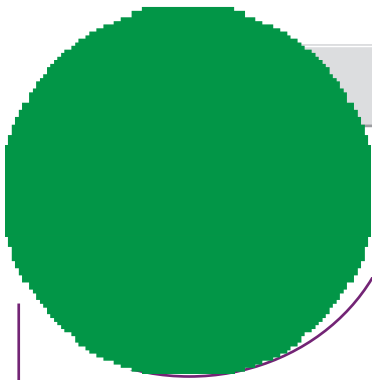

# Koala

GenBank: XM\_020985342

P29%

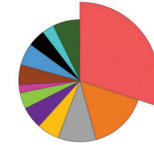

0

## *Phascolarctos cinereus*

Diprotodontia 9/18  
*Phascolarctidae* 0/1

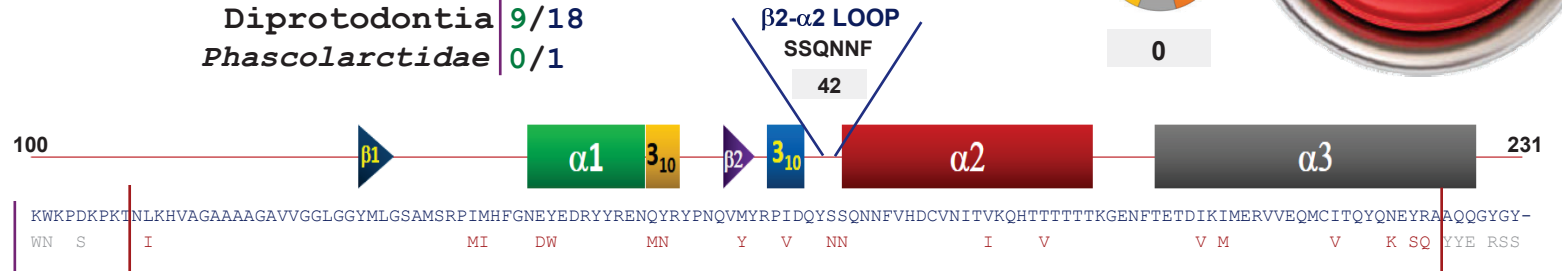

PrP sequence differs by 19 amino acids from the bank vole PrP (see in red)

- No deletions
- No insertions
- No polymorphic variants found

Tm<sup>Exp</sup>: ND  
 $\Delta\Delta$ G: ND

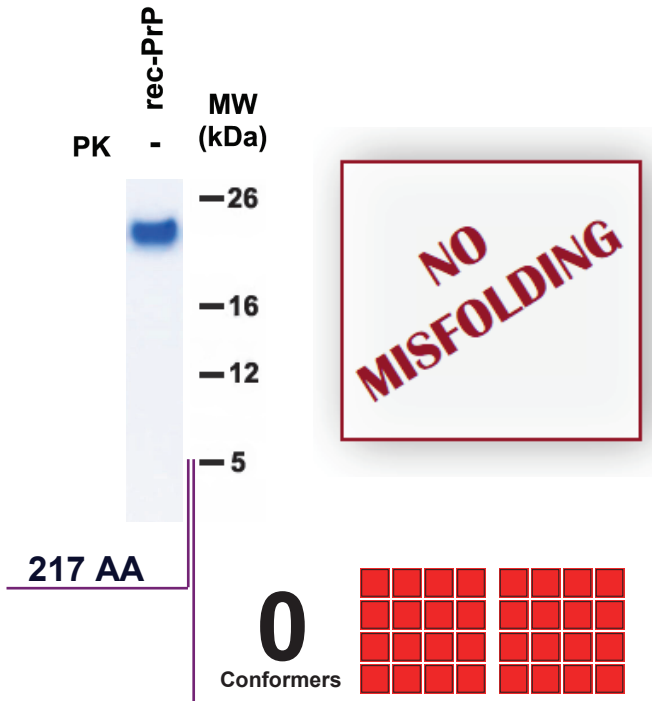

*In vitro* studies

**NOT APPLICABLE**

*In vivo* studies

**NOT APPLICABLE**

pLDDT [85.52]

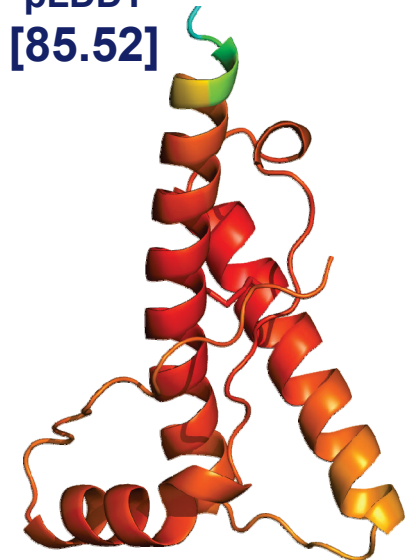

# Gilbert's potaroo

GenBank: **BK064793**

P29%



0

## *Potorous gilbertii*

Diprotodontia 9/18

Potoroidae 1/2

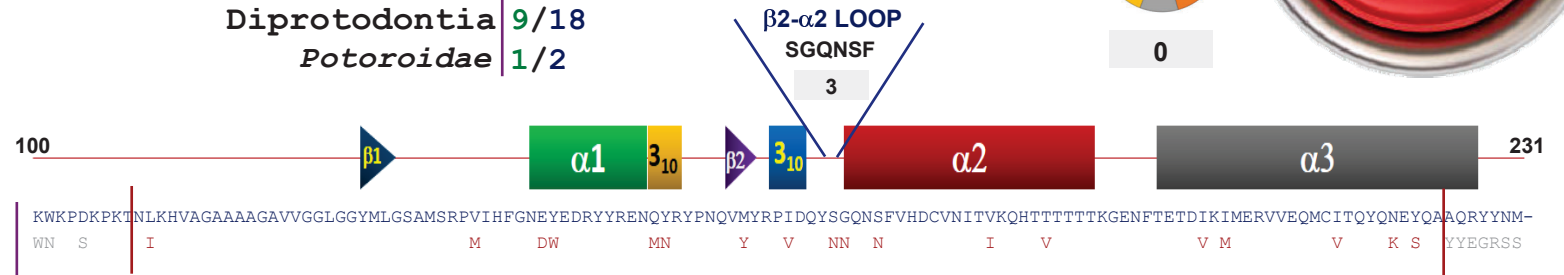

PrP sequence differs by 18 amino acids from the bank vole PrP (see in red)

- No deletions
- No insertions
- No polymorphic variants found

Tm<sup>Exp</sup>: ND

ΔΔG: ND

Distinct primary sequence across species

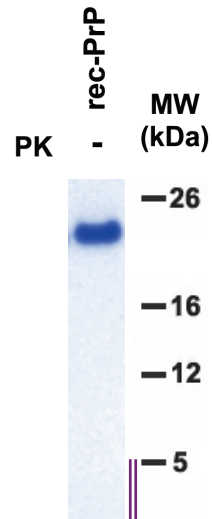

216 AA

0  
Conformers

**NO  
MISFOLDING**

*In vitro* studies

**NOT  
APPLICABLE**

*In vivo* studies

**NOT  
APPLICABLE**

pLDDT  
[92.95]

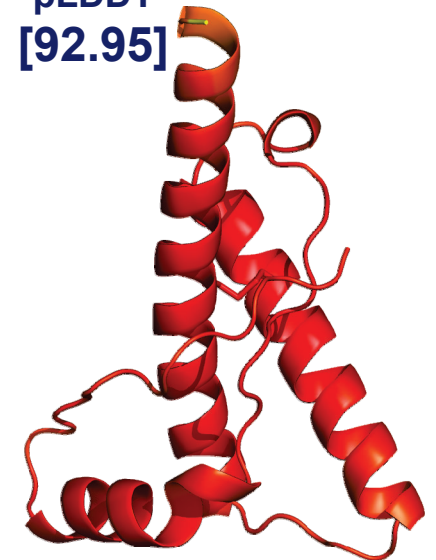



Distinct primary sequence across species

# Western ringtail

GenBank: **BK064794**

P70%

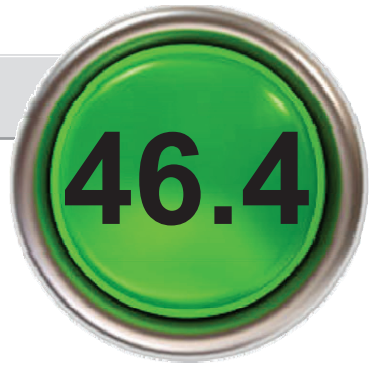

40-50

## *Pseudocheirus peregrinus*

Diprotodontia 9/18  
Pseudocheiridae 2/2

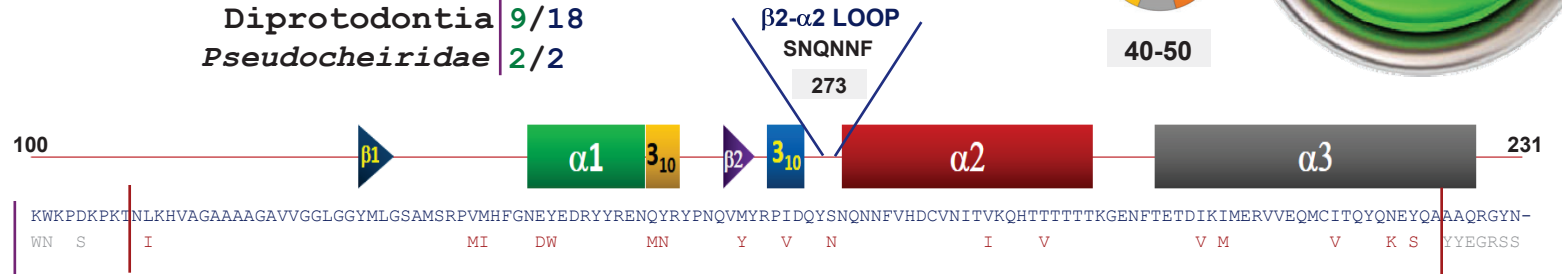

PrP sequence differs by 17 amino acids from the bank vole PrP (see in red)

No deletions  
No insertions  
No polymorphic variants found

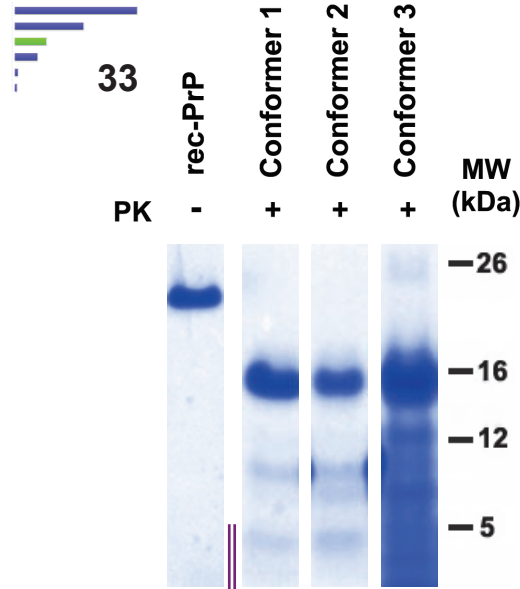

216 AA

**3**  
Conformers

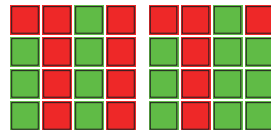

Tm<sup>Exp</sup>: ND  
ΔΔG: ND

### *In vitro* studies

TgVole (1x) Not tested  
Western ringtail Not tested

### *In vivo* studies

TgVole (1x) Not tested  
Western ringtail Not tested

pLDDT  
[88.55]

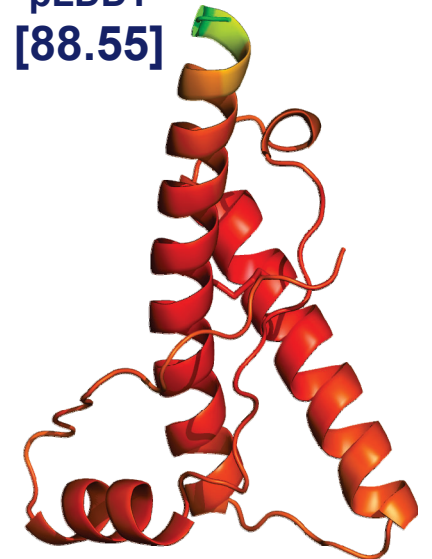

1 species sharing the same primary sequence

# Plush-coated ringtail possum

GenBank: **BK064795**

P49%

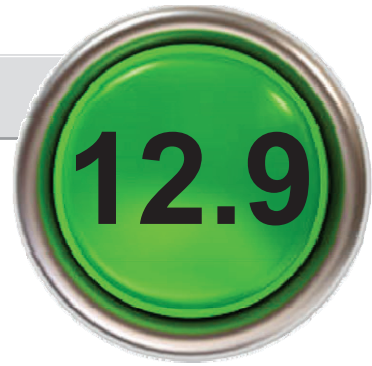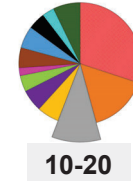

## *Pseudocheirops corinnae*

Diprotodontia 9/18  
Pseudocheiridae 2/2

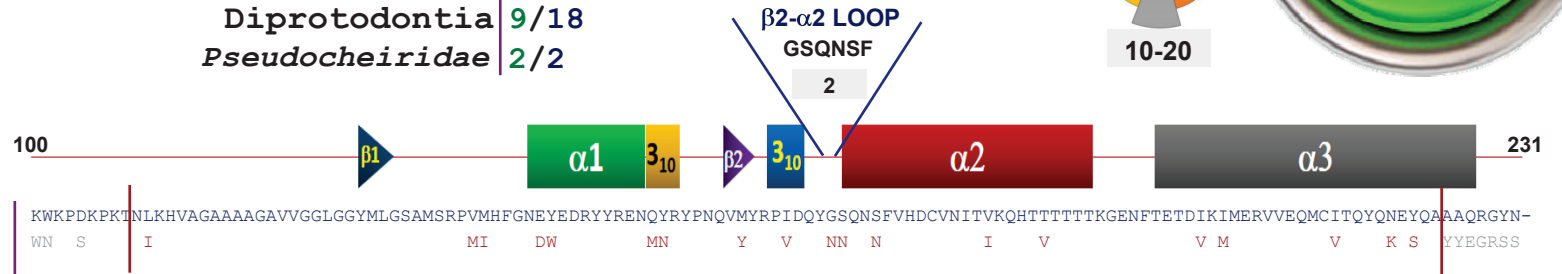

PrP sequence differs by 19 amino acids from the bank vole PrP (see in red)

No deletions  
No insertions  
No polymorphic variants found

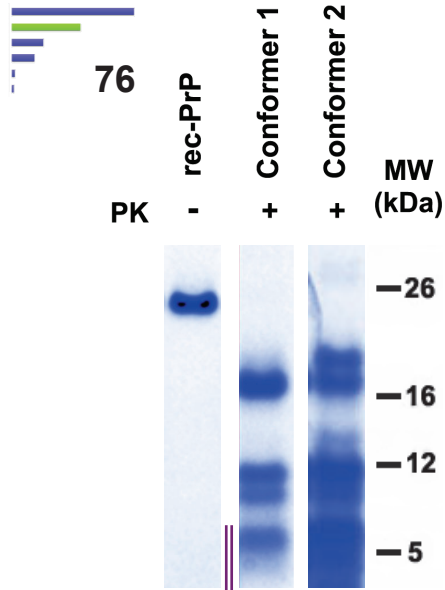

216 AA

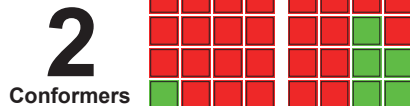

Tm<sup>Exp</sup>: ND  
ΔΔG: ND

### *In vitro* studies

TgVole (1x) Not tested  
Plush-coated ringtail possum Not tested

### *In vivo* studies

TgVole (1x) Not tested  
Plush-coated ringtail possum Not tested

pLDDT [88.63]

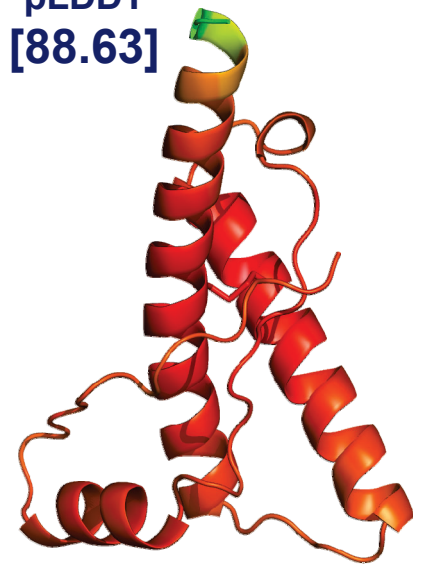

# Quokka

GenBank: **BK064765**

P29%



0

## Setonix brachyurus

Diprotodontia 9/18

Macropodidae 1/7

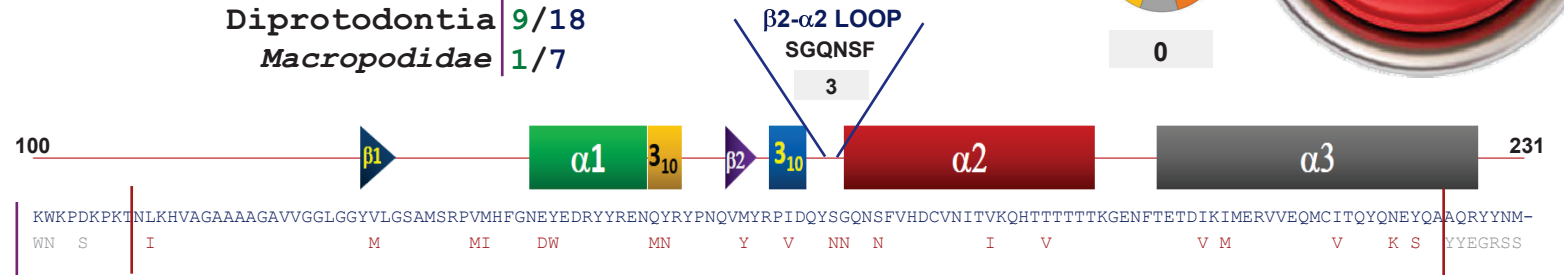

PrP sequence differs by 20 amino acids from the bank vole PrP (see in red)

- No deletions
- No insertions
- No polymorphic variants found

Tm<sup>Exp</sup>: ND

ΔΔG: ND

Distinct primary sequence across species

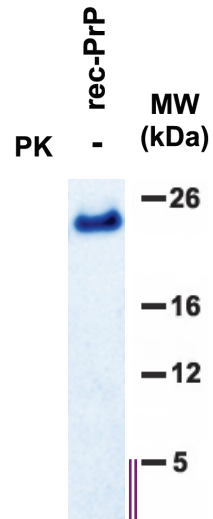

216 AA

0  
Conformers

**NO MISFOLDING**

*In vitro* studies

**NOT APPLICABLE**

*In vivo* studies

**NOT APPLICABLE**

pLDDT [93.34]

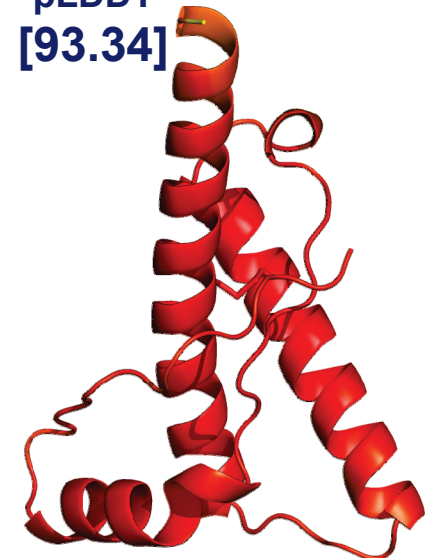

# Common brushtail possum

GenBank: L38993

P64%

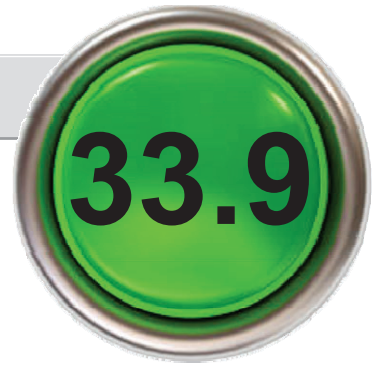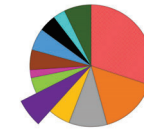

30-40

## Trichosurus vulpecula

Diprotodontia 9/18  
Phalangeridae 2/2

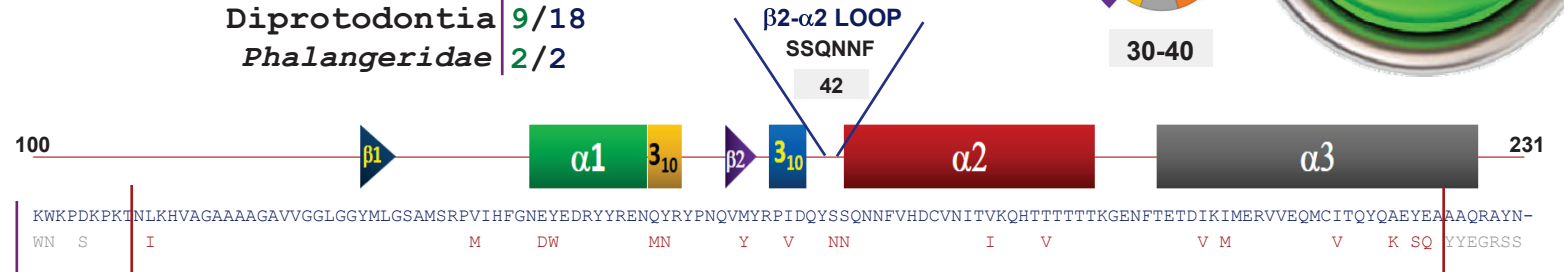

PrP sequence differs by 18 amino acids from the bank vole PrP (see in red)

- No deletions
- No insertions
- No polymorphic variants found

Distinct primary sequence across species

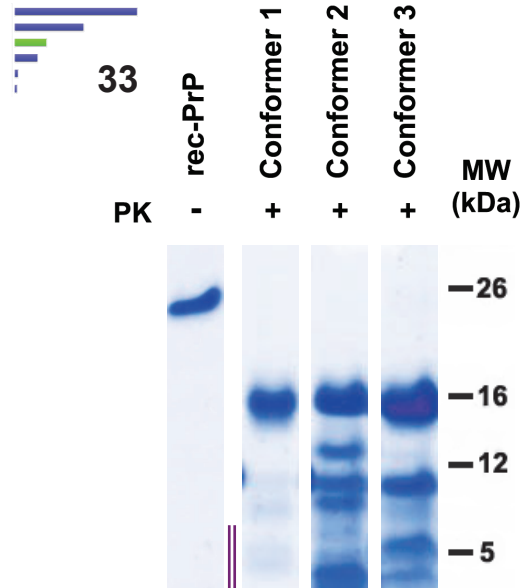

214 AA

3 Conformers

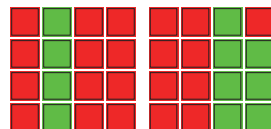

Tm<sup>Exp</sup>: ND  
ΔΔG: ND

### In vitro studies

- TgVole (1x) Not tested
- Common brushtail possum Not tested

### In vivo studies

- TgVole (1x) Not tested
- Common brushtail possum Not tested

pLDDT [92.87]

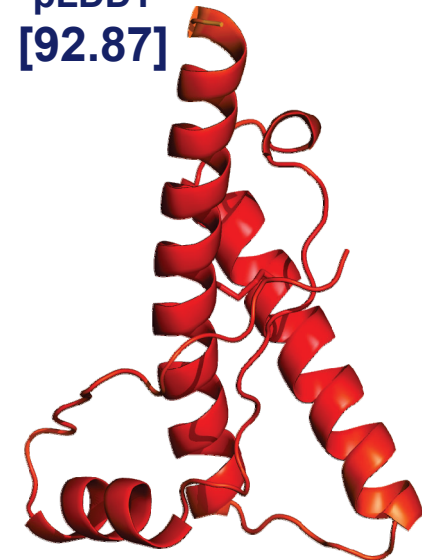

# Common wombat

GenBank: XM\_027865324

P45%

8.9



0-10

## Vombatus ursinus

Diprotodontia 9/18

Vombatidae 1/1

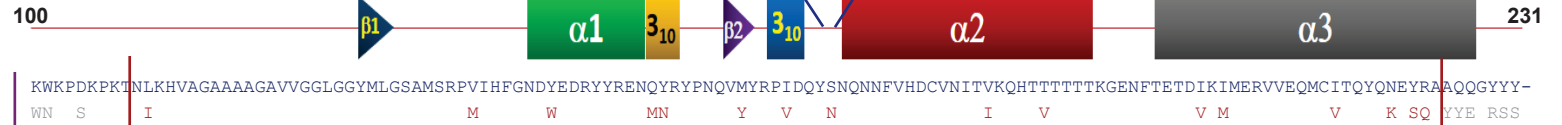

PrP sequence differs by 16 amino acids from the bank vole PrP (see in red)

No deletions  
No insertions  
No polymorphic variants found

Distinct primary sequence across species

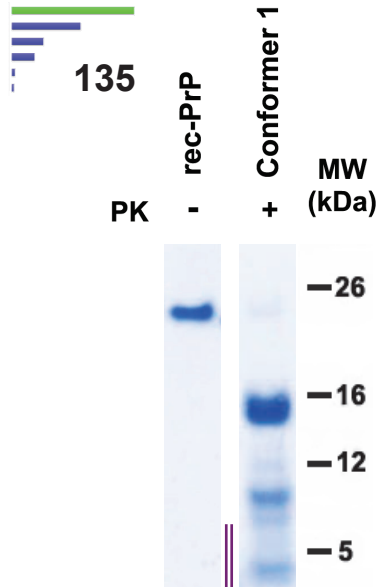

214 AA

1  
Conformers

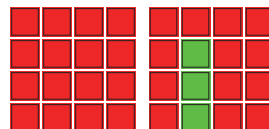

$T_m^{Exp}$ : ND

$\Delta\Delta G$ : ND

### In vitro studies

TgVole (1x) Not tested  
Common wombat Not tested

### In vivo studies

TgVole (1x) Not tested  
Common wombat Not tested

pLDDT  
[90.42]

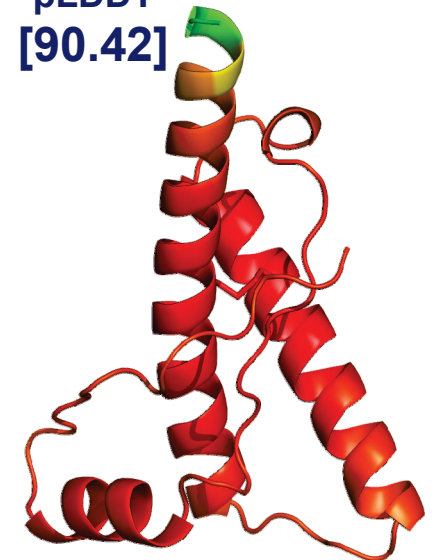

# Four-toed hedgehog

GenBank: **OR47273**

P58%

25.4



20-30

*Atelerix albiventris*

Erinaceomorpha 3/3

Erinaceidae 3/3

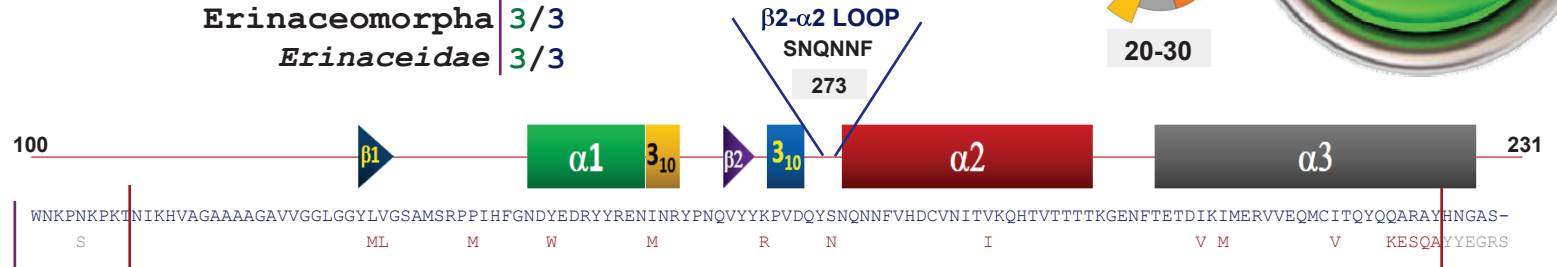

PrP sequence differs by 16 amino acids from the bank vole PrP (see in red)

- No deletions
- No insertions
- No polymorphic variants found

Distinct primary sequence across species

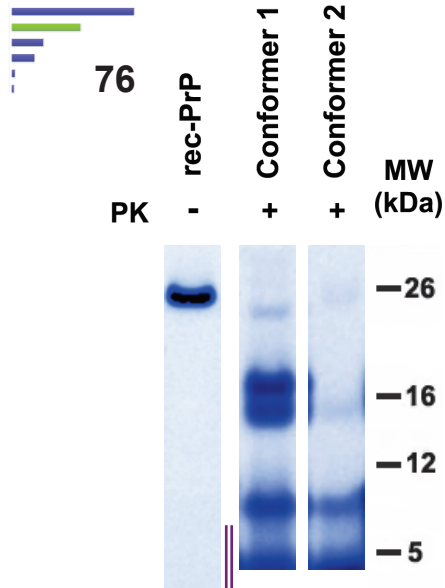

226 AA

2 Conformers

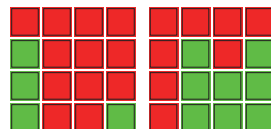

Tm<sup>Exp</sup>: ND  
ΔΔG: ND

**In vitro studies**

- TgVole (1x) Not tested
- Four-toed hedgehog Not tested

**In vivo studies**

- TgVole (1x) Not tested
- Four-toed hedgehog Not tested

pLDDT [88.74]

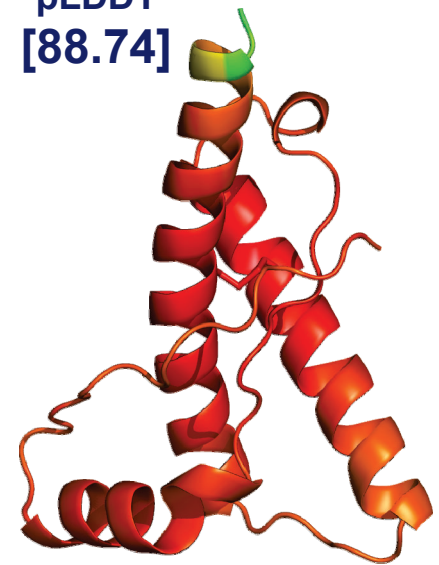

# European hedgehog

GenBank: EU572708

P34%



0

## *Erinaceus europaeus*

Erinaceomorpha 3/3

Erinaceidae 3/3

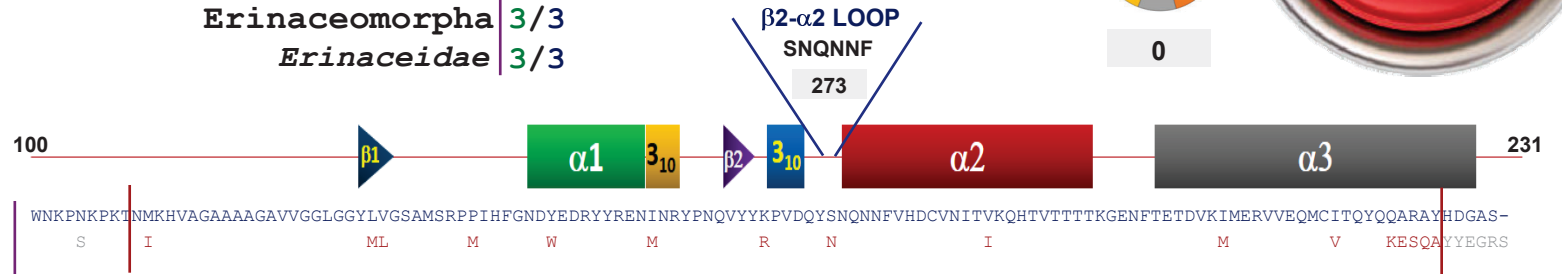

PrP sequence differs by 16 amino acids from the bank vole PrP (see in red)

- No deletions
- No insertions
- No polymorphic variants found

Tm<sup>Exp</sup>: ND

ΔΔG: ND

Distinct primary sequence across species

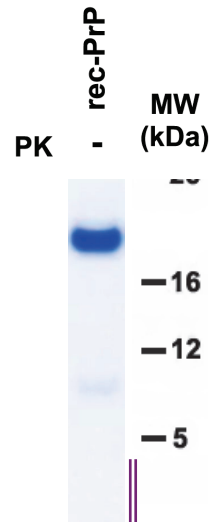

216 AA

0  
Conformers

**NO  
MISFOLDING**

*In vitro* studies

**NOT  
APPLICABLE**

*In vivo* studies

**NOT  
APPLICABLE**

pLDDT  
[90.76]

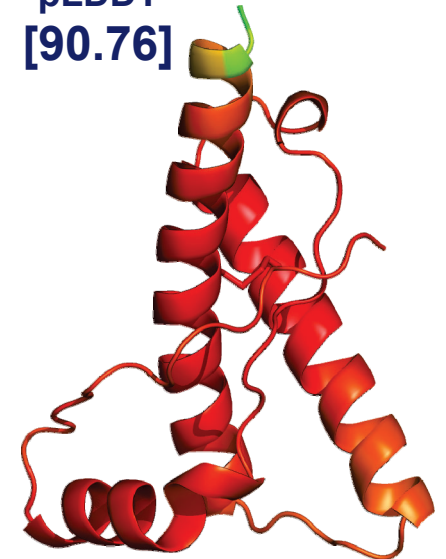

# Short-tailed gymnure

GenBank: AY133044

P65%

36.1



30-40

## *Hylomys suillus*

Erinaceomorpha 3/3  
Erinaceidae 3/3

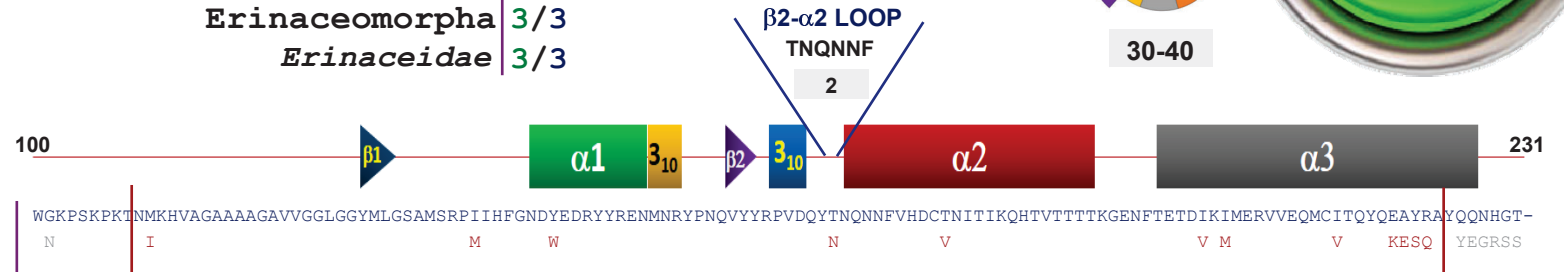

PrP sequence differs by 12 amino acids from the bank vole PrP (see in red)

No deletions  
No insertions  
No polymorphic variants found

Distinct primary sequence across species

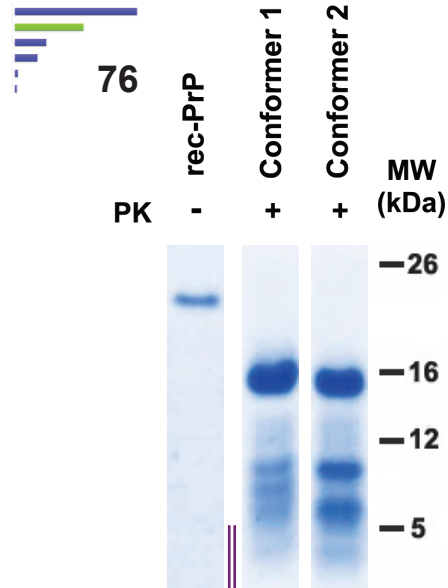

223 AA

2 Conformers

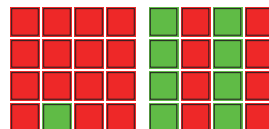

Tm<sup>Exp</sup>: ND

ΔΔG: -10.37

### In vitro studies

TgVole (1x) Not tested  
Short-tailed gymnure Not tested

### In vivo studies

TgVole (1x) Not tested  
Short-tailed gymnure Not tested

pLDDT [90.72]

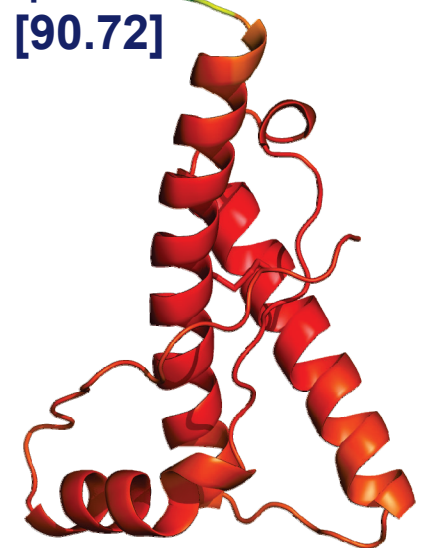



1 species sharing the same primary sequence

Yellow-spotted rock hyrax  
*Heterohyrax brucei*

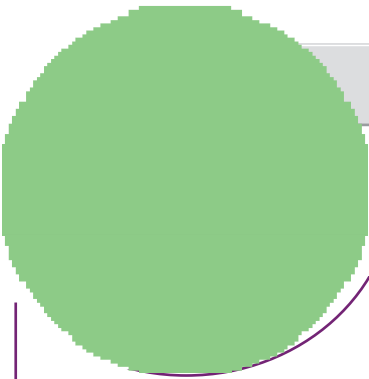

# Rock hyrax

GenBank: AY133057

## *Procavia capensis*

Hyracoidea 0/1

Procaviidae 0/1

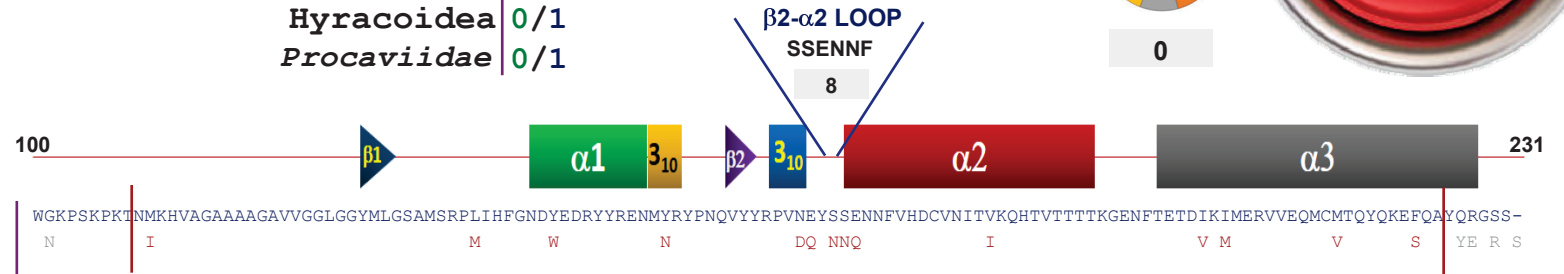

PrP sequence differs by 14 amino acids from the bank vole PrP (see in red)

- No deletions
- No insertions
- No polymorphic variants found

P29%



0



Tm<sup>Exp</sup>: ND

ΔΔG: ND

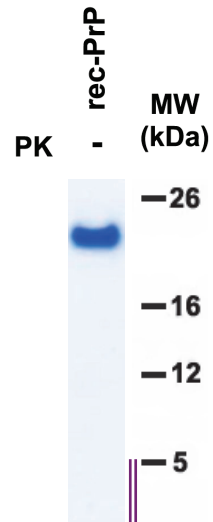

211 AA

0 Conformers



**NO MISFOLDING**

*In vitro* studies

**NOT APPLICABLE**

*In vivo* studies

**NOT APPLICABLE**

pLDDT [85.66]

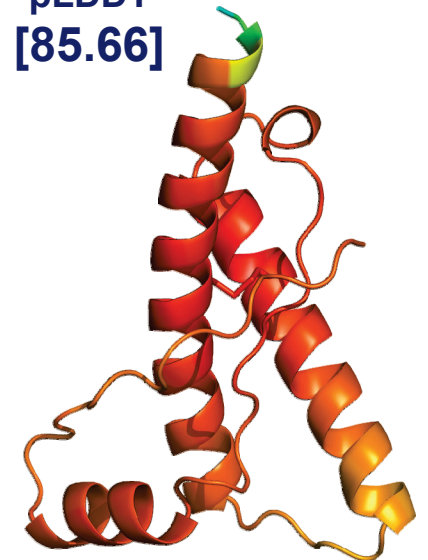

# Brown hare

GenBank: [OR472454](#)

P40%

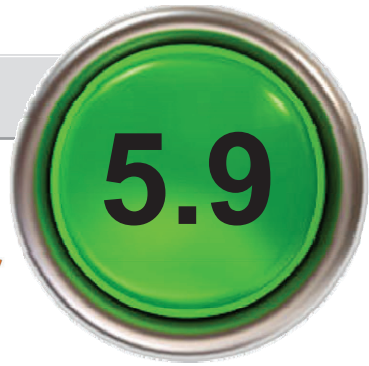

0-10

## *Lepus europaeus*

Lagomorpha 4/5  
Leporidae 3/4

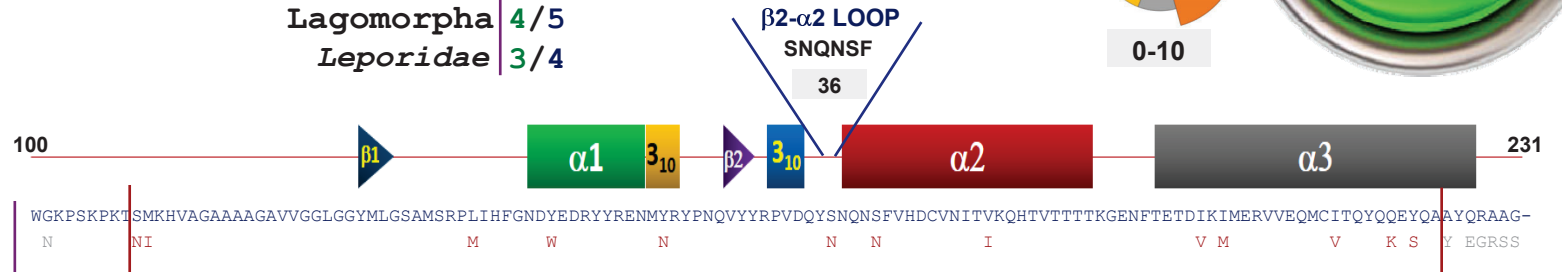

PrP sequence differs by 13 amino acids from the bank vole PrP (see in red)

No deletions  
No insertions  
No polymorphic variants found

3 species sharing the same primary sequence

- Snowshoe hare *Lepus americanus*
- Mountain hare *Lepus timidus*
- White-tailed jackrabbit *Lepus townsendii*

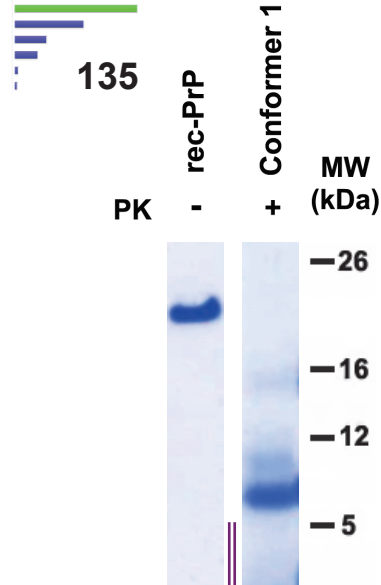

210 AA

1  
Conformers

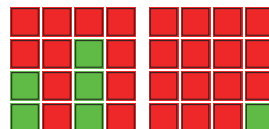

Tm<sup>Exp</sup>: ND

ΔΔG: -17.76

### In vitro studies

TgVole (1x) Not tested

Brown hare Not tested

### In vivo studies

TgVole (1x) Not tested

Brown hare Not tested

pLDDT  
[90.29]

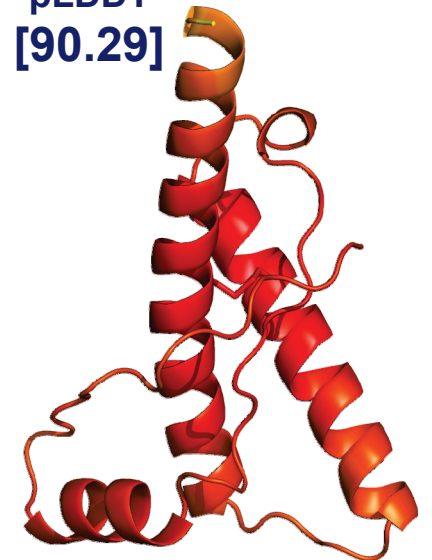

1 species sharing the same primary sequence

# American pika

GenBank: EU555402

P53%

17.9

## Ochotona princeps

Lagomorpha 4/5  
Ochotonidae 1/1

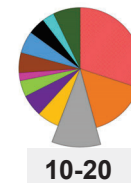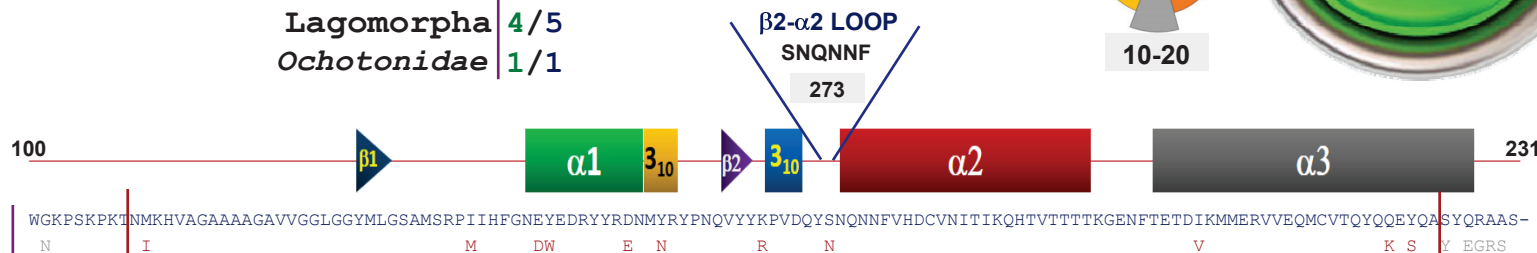

PrP sequence differs by 11 amino acids from the bank vole PrP (see in red)

No deletions  
No insertions  
No polymorphic variants found

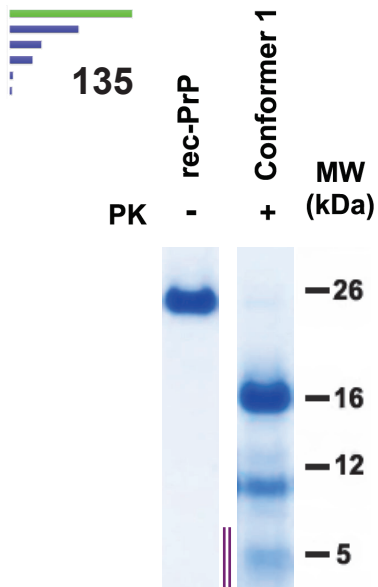

210 AA

1  
Conformers

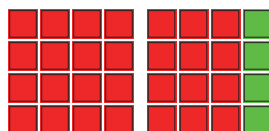

$T_m^{Exp}$ : ND

$\Delta\Delta G$ : -12.67

### In vitro studies

TgVole (1x) Not tested  
American pika Not tested

### In vivo studies

TgVole (1x) Not tested  
American pika Not tested

pLDDT [88.07]

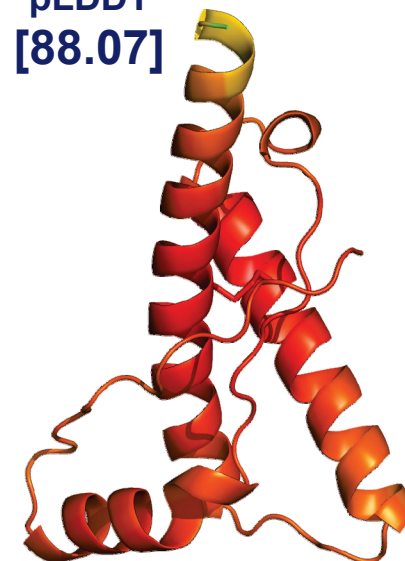

Distinct primary sequence across species

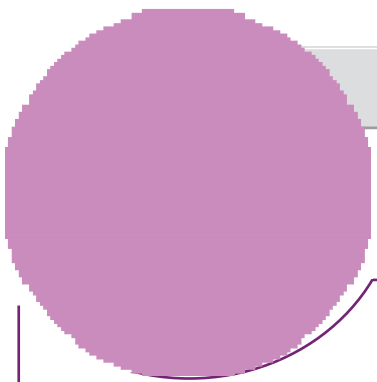

# Rabbit

GenBank: NM\_001082021

P34%

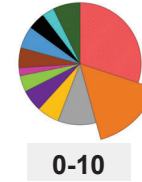

## Oryctolagus cuniculus

Lagomorpha 4/5  
Leporidae 3/4

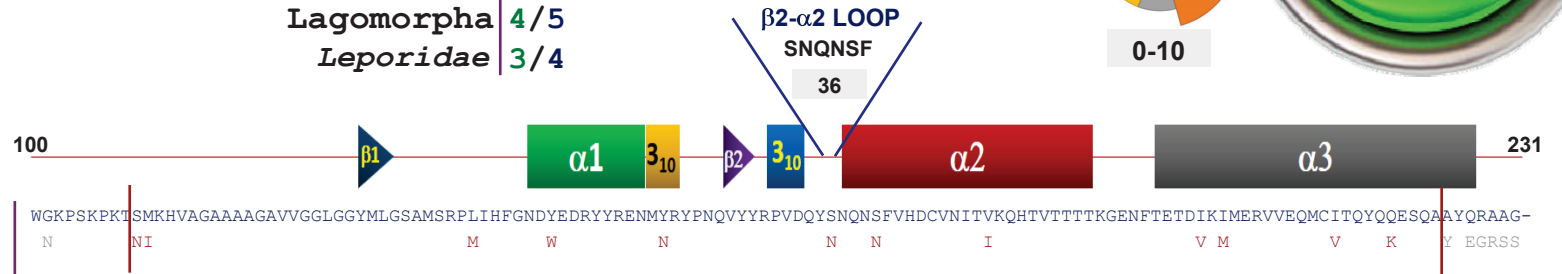

PrP sequence differs by 12 amino acids from the bank vole PrP (see in red)

- No deletions
- No insertions
- No polymorphic variants found

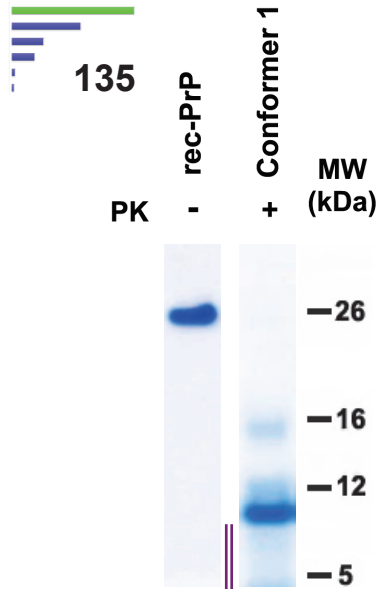

1  
Conformers

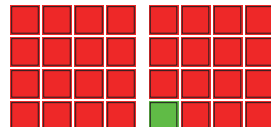

Tm<sup>Exp</sup>: ND

ΔΔG: -13.56

### In vitro studies

- TgVole (1x) Propagate
- Rabbit Ongoing

### In vivo studies

- TgVole (1x) Infectious
- TgRabbit Ongoing

pLDDT [89.85]

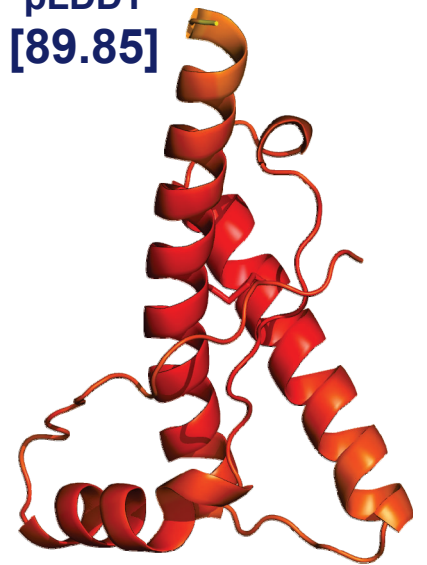

Distinct primary sequence across species

# Brush rabbit

GenBank: **BK063974**

## *Sylvilagus bachmani*

Lagomorpha 4/5

Leporidae 3/4

P49%

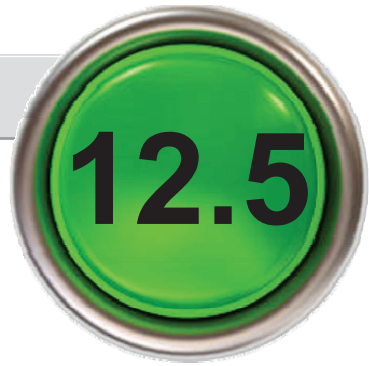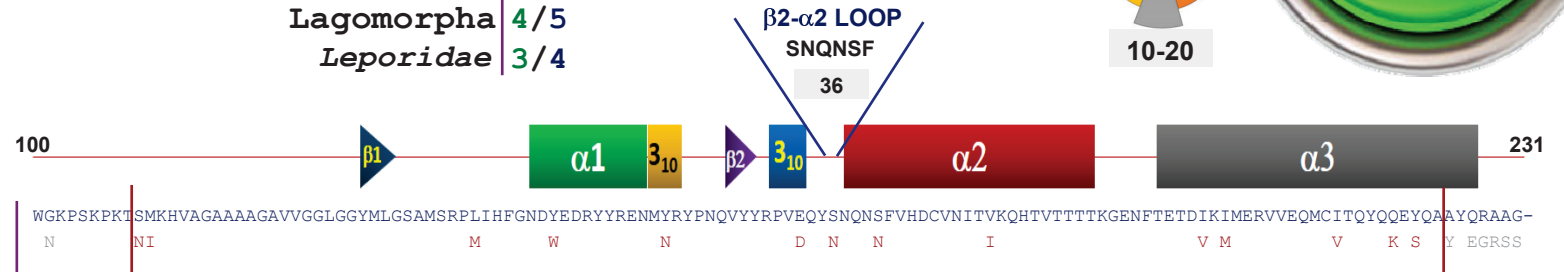

PrP sequence differs by 14 amino acids from the bank vole PrP (see in red)

- No deletions
- No insertions
- No polymorphic variants found

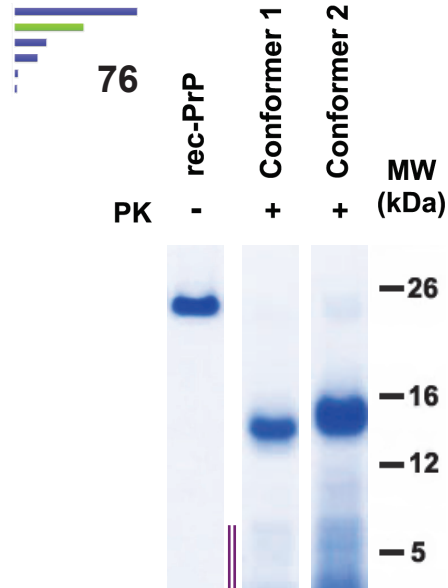

210 AA

**2**  
Conformers

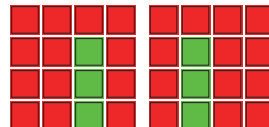

Tm<sup>Exp</sup>: ND

ΔΔG: -15.86

### *In vitro* studies

|              |            |
|--------------|------------|
| TgVole (1x)  | Not tested |
| Brush rabbit | Not tested |

### *In vivo* studies

|              |            |
|--------------|------------|
| TgVole (1x)  | Not tested |
| Brush rabbit | Not tested |

pLDDT [89.61]

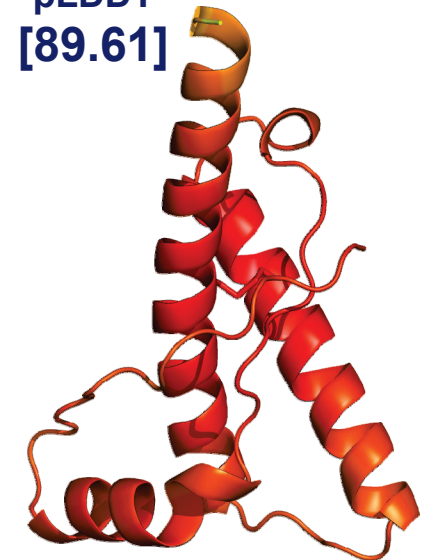

# New England cottontail

GenBank: **BK064962**

P29%



0

## *Sylvilagus transitionalis*

Lagomorpha 4/5

Leporidae 3/4

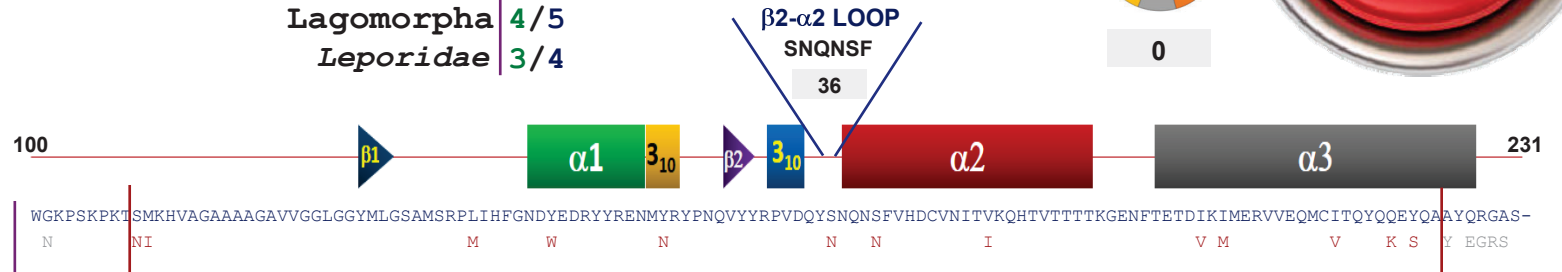

PrP sequence differs by 13 amino acids from the bank vole PrP (see in red)

- No deletions
- No insertions
- No polymorphic variants found

$T_m^{Exp}$ : ND

$\Delta\Delta G$ : -18.5

Distinct primary sequence across species

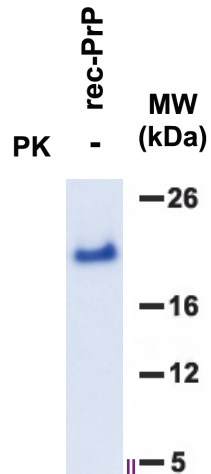

210 AA

0  
Conformers

NO  
MISFOLDING

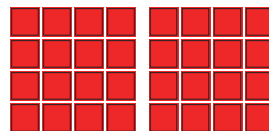

*In vitro* studies

NOT  
APPLICABLE

*In vivo* studies

NOT  
APPLICABLE

pLDDT  
[92.35]

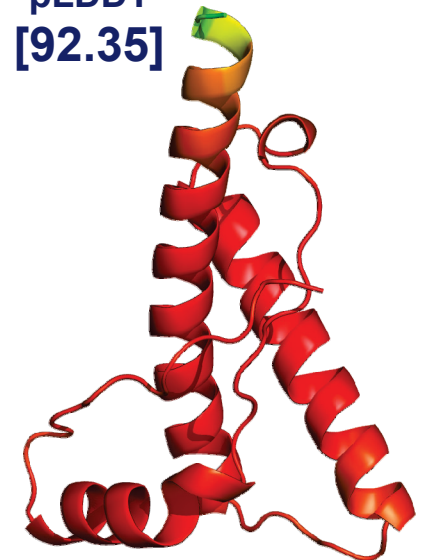

# Cape elephant shrew

GenBank: XM\_006894222

P29%



0

## *Elephantulus edwardii*

Macroscelidea 1/2

Macroscelididae 1/2

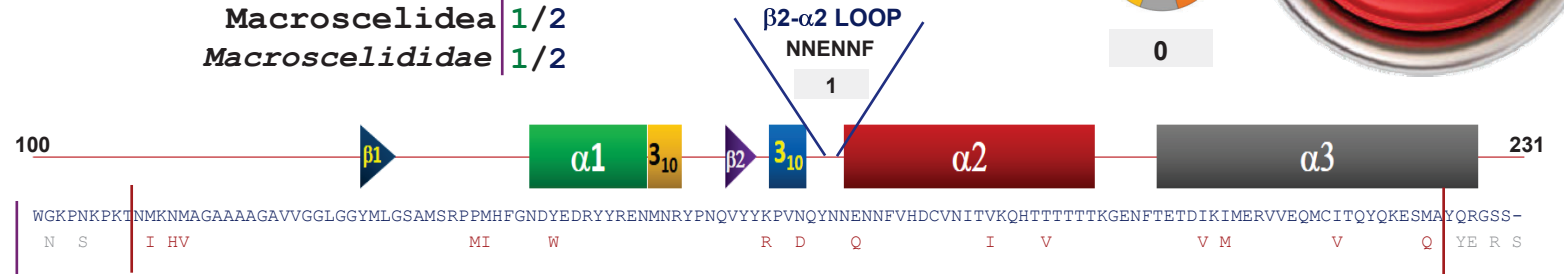

PrP sequence differs by 15 amino acids from the bank vole PrP (see in red)

- No deletions
- No insertions
- No polymorphic variants found

Tm<sup>Exp</sup>: ND

ΔΔG: ND

Distinct primary sequence across species

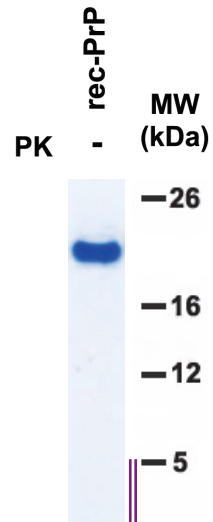

**NO MISFOLDING**

*In vitro* studies

**NOT APPLICABLE**

*In vivo* studies

**NOT APPLICABLE**

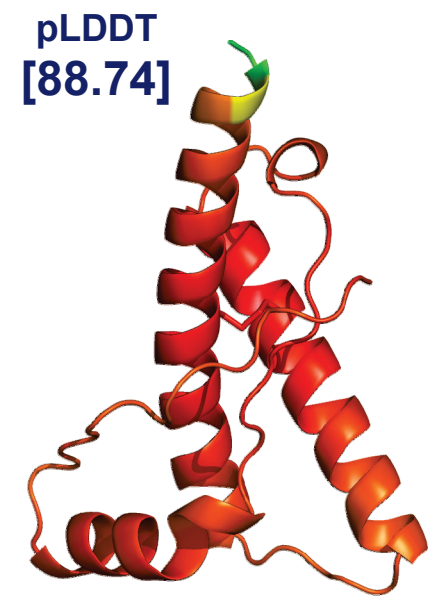

213 AA

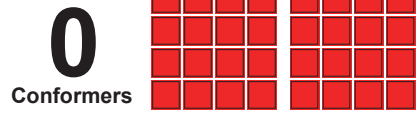

# Round-eared elephant shrew

GenBank: AY133059

P58%

26.4



20-30

## Macroscelides proboscideus

Macroscelidea 1/2  
Macroscelididae 1/2

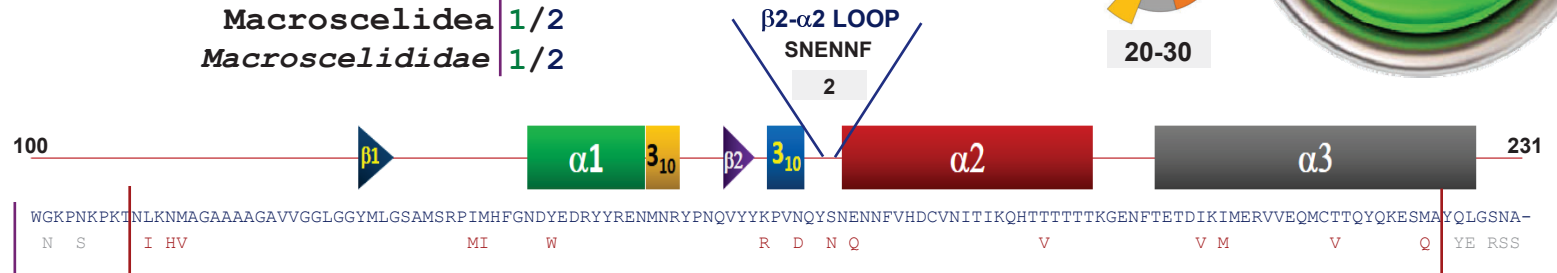

WGKPNKPKTINLKNMAGAAAAGAVVGGGLGGYMLGSAMSRPIMHFVNDYEDRYRENMNRYPNQVYKPVNQYSNENNFVHDCVNIITIKQHTTTTTTKGFNTETDIDIKIMERVEVQMCCTTQYQKESMAYQLGSNA-  
N S I HV MI W R D N Q V V M V Q YE RSS

PrP sequence differs by 15 amino acids from the bank vole PrP (see in red)

- No deletions
- No insertions
- No polymorphic variants found

Distinct primary sequence across species

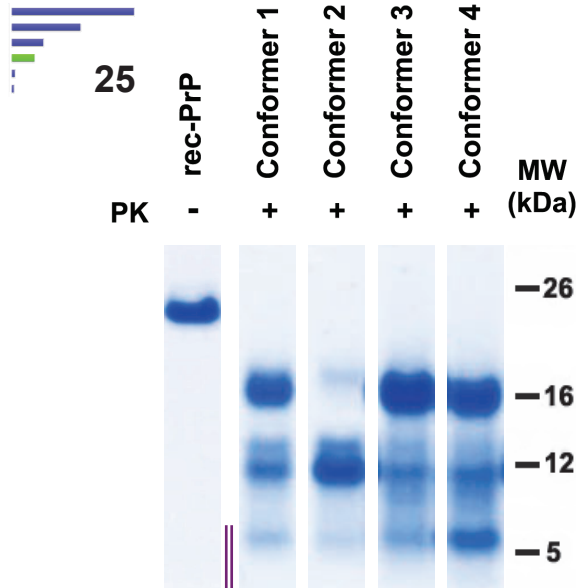

215 AA

4  
Conformers

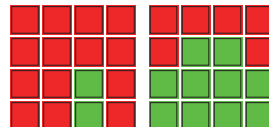

Tm<sup>Exp</sup>: ND

ΔΔG: -9.98

### In vitro studies

TgVole (1x) Not tested

Round-eared elephant shrew Not tested

### In vivo studies

TgVole (1x) Not tested

Round-eared elephant shrew Not tested

pLDDT [89.61]

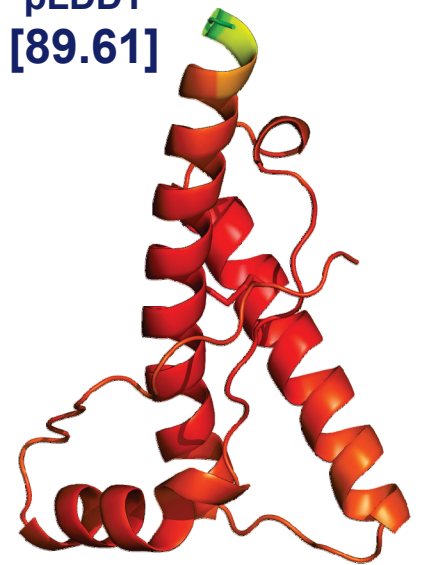



# Colocolo opossum

GenBank: **BK064161**

P39%

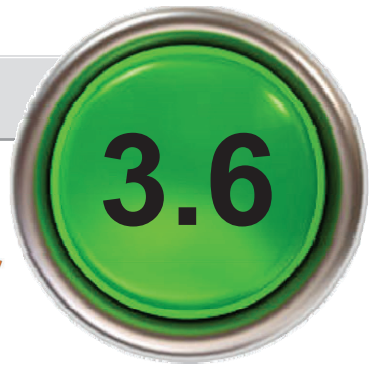

0-10

## *Dromiciops gliroides*

Microbiotheria 1/1

Microbiotheriidae 1/1

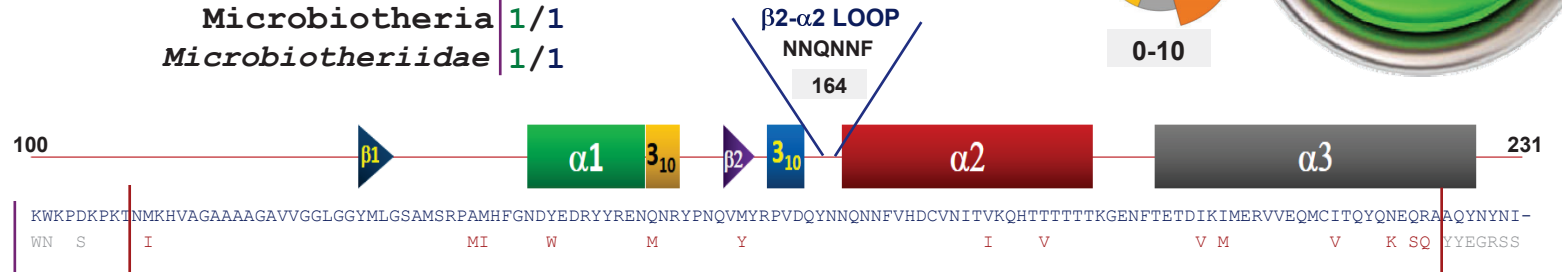

PrP sequence differs by 14 amino acids from the bank vole PrP (see in red)

- No deletions
- No insertions
- No polymorphic variants found

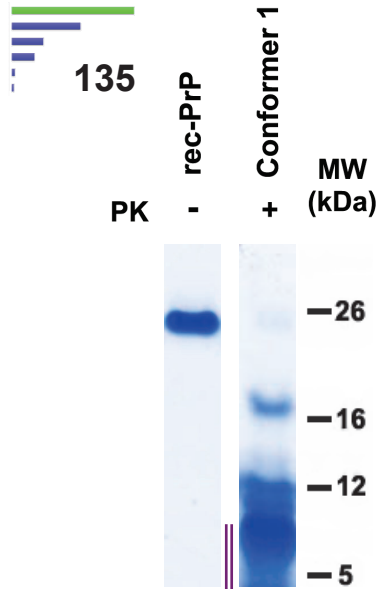

202 AA

1  
Conformers

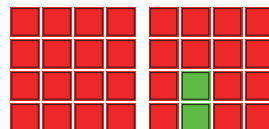

Tm<sup>Exp</sup>: ND

ΔΔG: ND

### *In vitro* studies

**No propagation**  
TgVole (1x)

Not tested  
Colocolo opossum

### *In vivo* studies

Ongoing  
TgVole (1x)

Not tested  
Colocolo opossum

pLDDT  
[88.92]

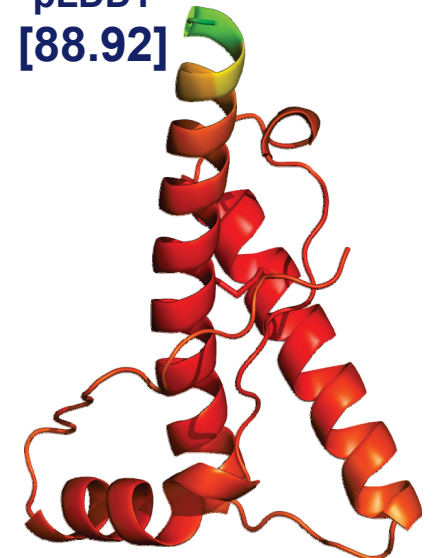

1 species sharing the same primary sequence

Pancho's colocolo opossum  
*Dromiciops bozinovici*

# Platypus

GenBank: XM\_029065640

P29%



0

## Ornithorhynchus anatinus

Monotremata 0/2

Ornithorhynchidae 0/1

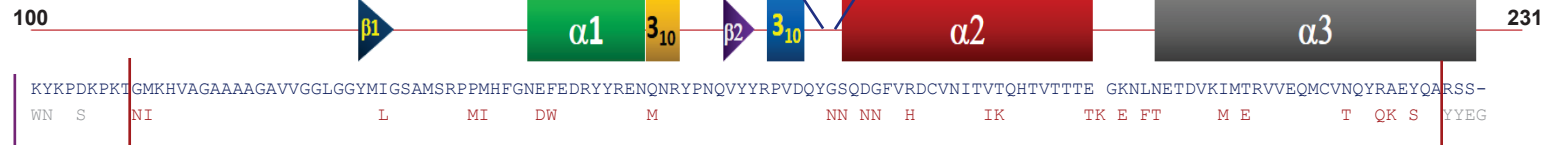

PrP sequence differs by 26 amino acids from the bank vole PrP (see in red)

One deletion  
 No insertions  
 No polymorphic variants found

Tm<sup>Exp</sup>: ND

ΔΔG: ND

Distinct primary sequence across species

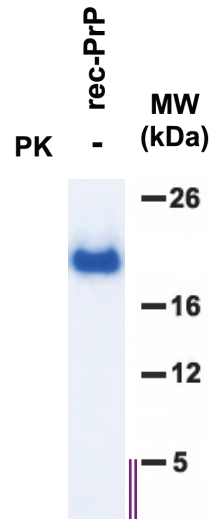

208 AA

0 Conformers

**NO MISFOLDING**

*In vitro* studies

**NOT APPLICABLE**

*In vivo* studies

**NOT APPLICABLE**

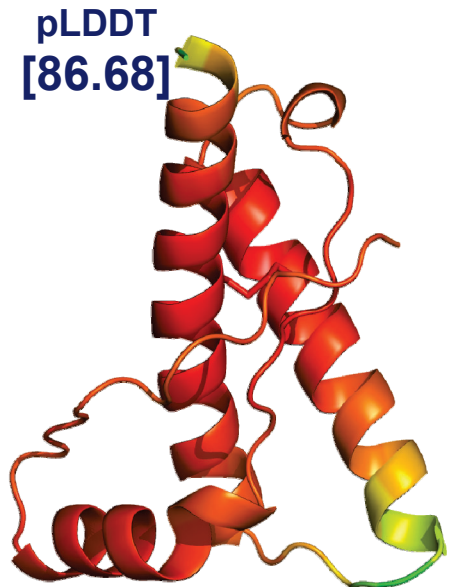

# Short-beaked echidna

GenBank: **BK063950**

P29%



0

## *Tachyglossus aculeatus*

Monotremata 0/2

Tachyglossidae 0/1

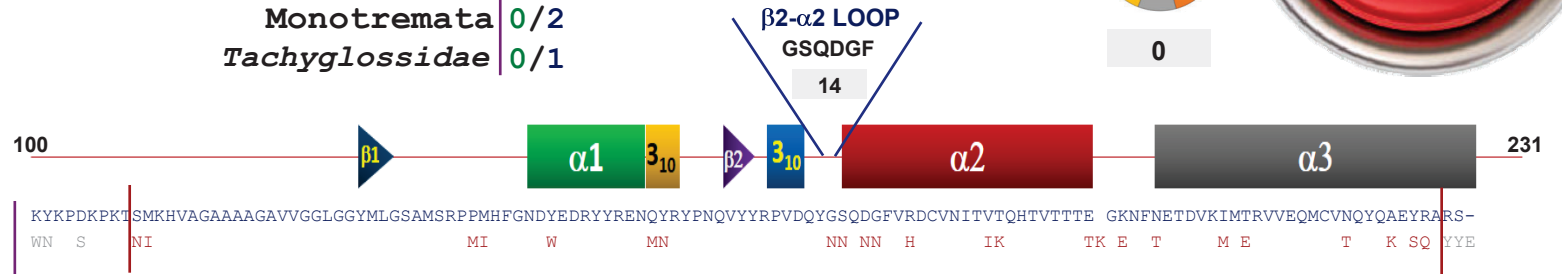

PrP sequence differs by 24 amino acids from the bank vole PrP (see in red)

One deletion  
No insertions  
No polymorphic variants found

Tm<sup>Exp</sup>: ND

ΔΔG: ND

Distinct primary sequence across species

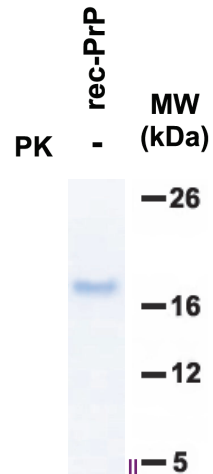

197 AA

0  
Conformers

**NO  
MISFOLDING**

 *In vitro* studies

**NOT  
APPLICABLE**

 *In vivo* studies

**NOT  
APPLICABLE**

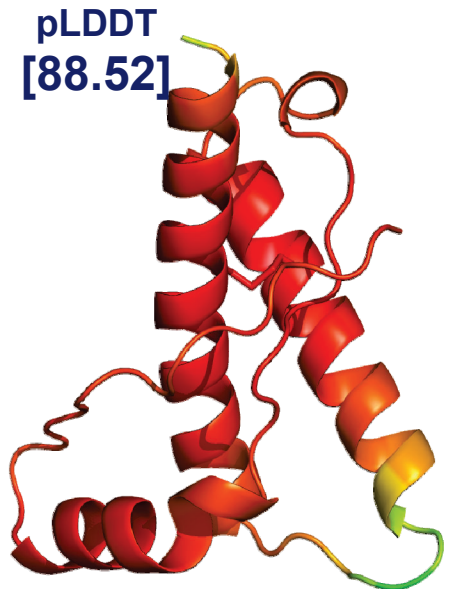

Distinct primary sequence across species

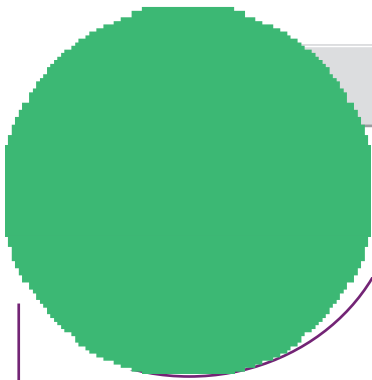

# Southern marsupial mole

GenBank: **BK064812**

## *Notoryctes typhlops*

Notoryctemorphia 0/1

Notoryctidae 0/1

P29%



0

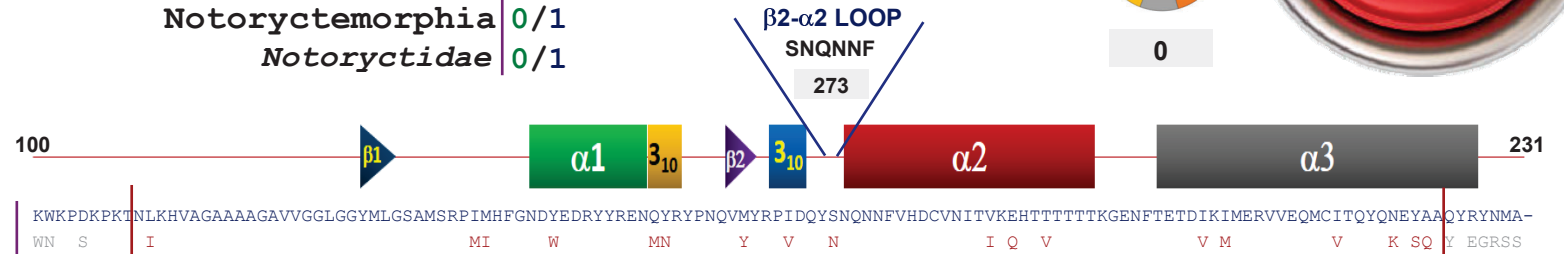

PrP sequence differs by 18 amino acids from the bank vole PrP (see in red)

- No deletions
- No insertions
- No polymorphic variants found

Tm<sup>Exp</sup>: ND

ΔΔG: **-15.2**

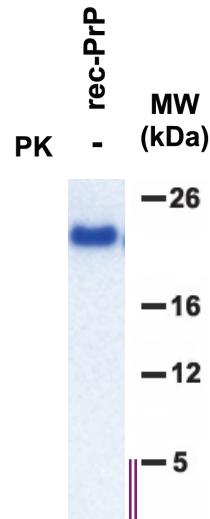

215 AA

0 Conformers

**NO MISFOLDING**

*In vitro* studies

**NOT APPLICABLE**

*In vivo* studies

**NOT APPLICABLE**

pLDDT [93.3]

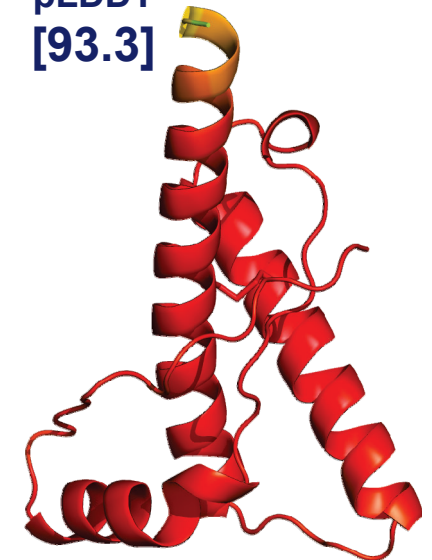

# Southern white rhinoceros

GenBank: XM\_014790100

P36%

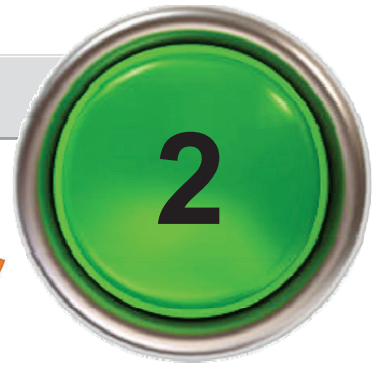

## *Ceratotherium simum simum*

Perissodactyla 6/6  
Rhinocerotidae 1/1

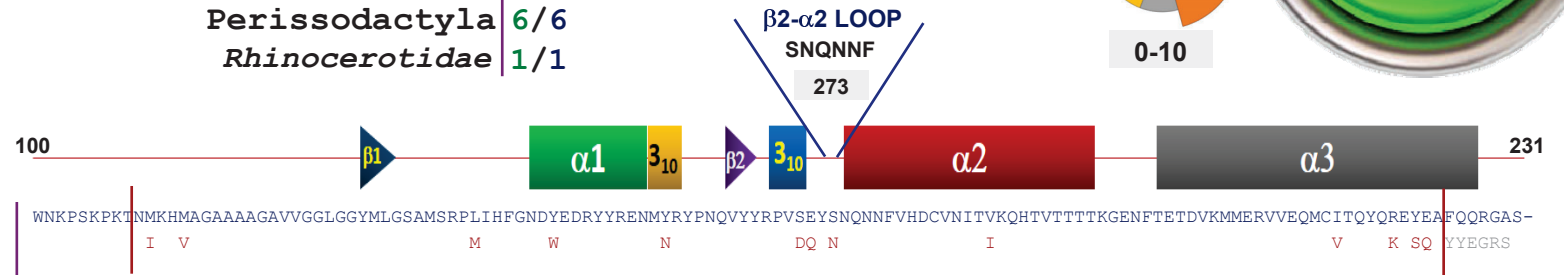

PrP sequence differs by 13 amino acids from the bank vole PrP (see in red)

- No deletions
- No insertions
- No polymorphic variants found

3 species sharing the same primary sequence

- Bornean rhinoceros *Dicerorhinus sumatrensis harrissoni*
- Black rhinoceros *Diceros bicornis*
- White rhinoceros *Rhinoceros unicornis*

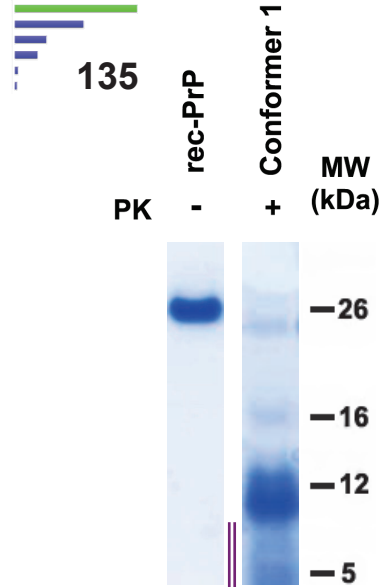

212 AA

1  
Conformers

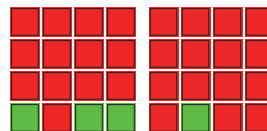

Tm<sup>Exp</sup>: ND

ΔΔG: -11.01

### In vitro studies

TgVole (1x) Not tested

Southern white rhinoceros Not tested

### In vivo studies

TgVole (1x) Not tested

Southern white rhinoceros Not tested

pLDDT [88.31]

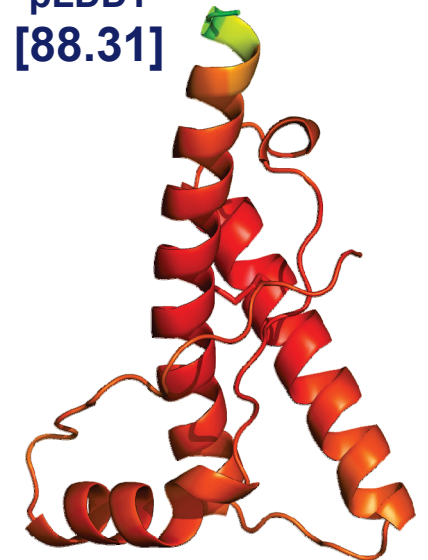

1 species sharing the same primary sequence

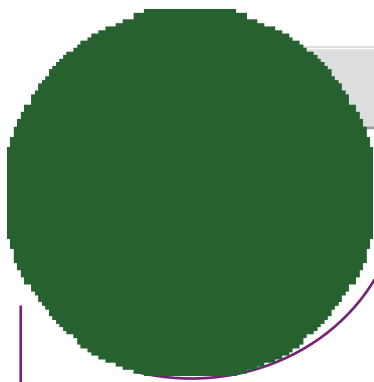

# Asinus

GenBank: **BK064942**

P39%

3.6



0-10

## Equus asinus

Perissodactyla 6/6

Equidae 3/3

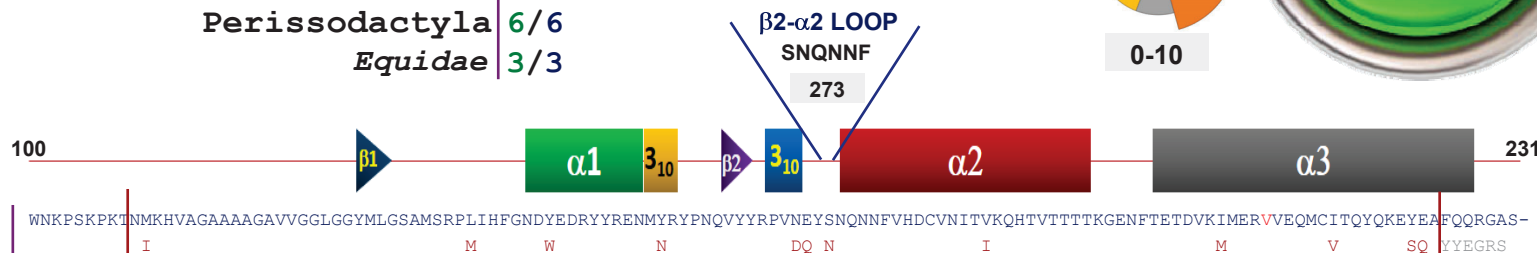

PrP sequence differs by 12 amino acids from the bank vole PrP (see in red)

No deletions  
No insertions  
It shows polymorphic variants

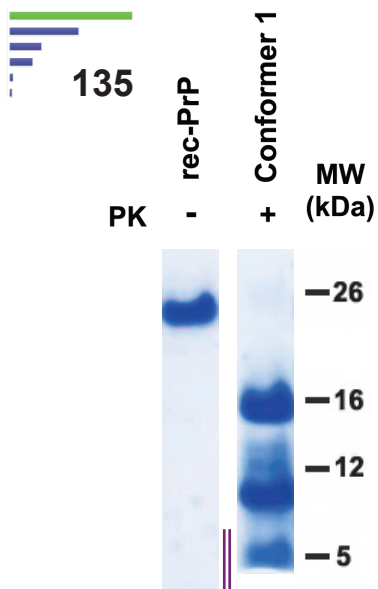

211 AA

1 Conformers

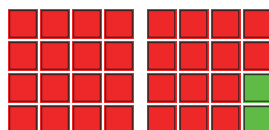

Tm<sup>Exp</sup>: ND

ΔΔG: -2.76

### In vitro studies

TgVole (1x) Not tested

Asinus Not tested

### In vivo studies

TgVole (1x) Not tested

Asinus Not tested

pLDDT [86.98]

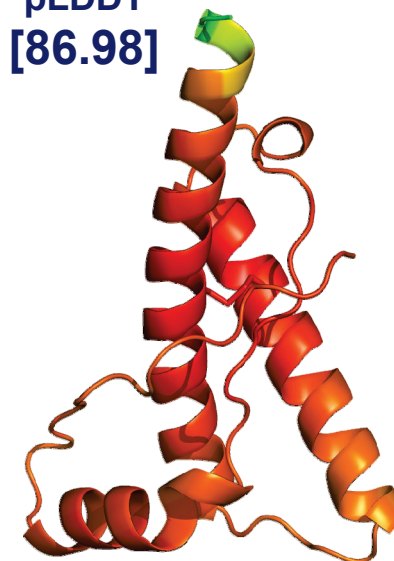

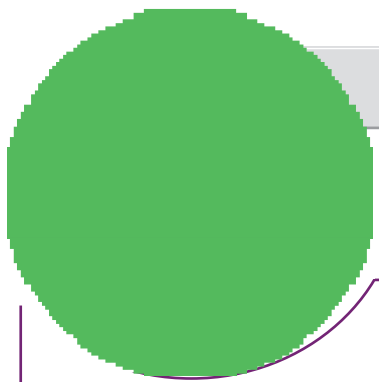

# Horse

GenBank: EU887260

P41%

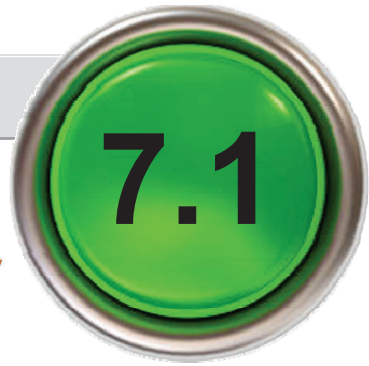

0-10

## *Equus caballus ferus*

Perissodactyla 6/6  
Equidae 3/3

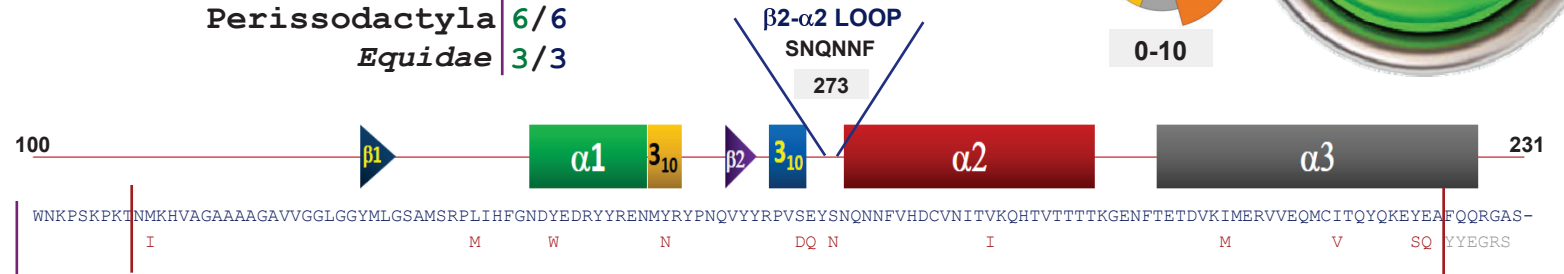

PrP sequence differs by 12 amino acids from the bank vole PrP (see in red)

No deletions  
No insertions  
It shows polymorphic variants

5 species sharing the same primary sequence

- Burchell's zebra *Equus burchellii*
- Grévy's zebra *Equus grevyi*
- Kiang *Equus kiang*
- Grant's zebra *Equus quagga boehmi*
- Mountain zebra *Equus zebra hartmannae*

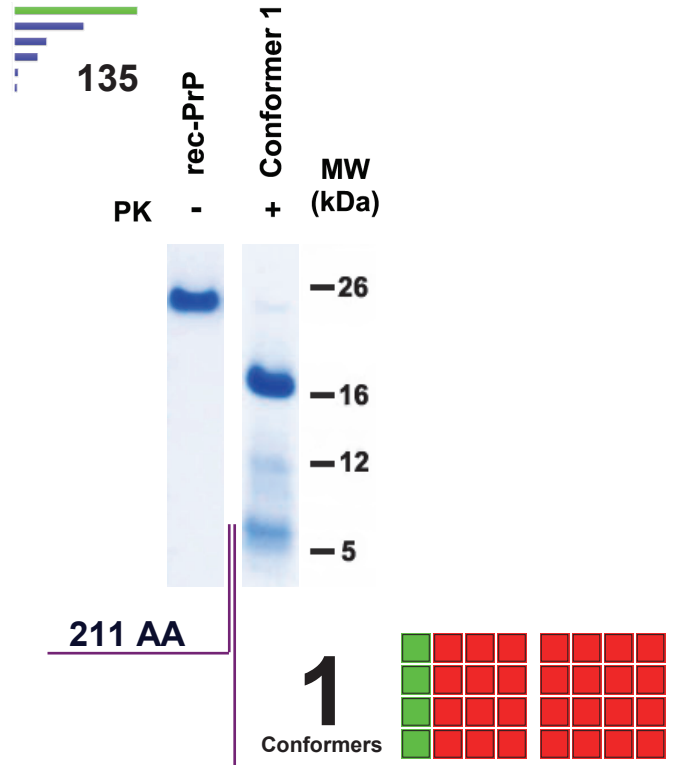

Tm<sup>Exp</sup>: ND  
ΔΔG: -4.71

### *In vitro* studies

TgVole (1x) Propagate  
Horse Ongoing

### *In vivo* studies

TgVole (1x) Ongoing  
Horse Not tested

pLDDT [88.55]

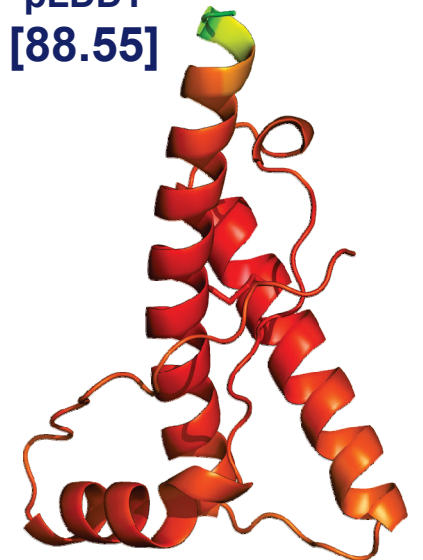

# Przewalski's horse

GenBank: XM\_008519788

P51%

14.3

## *Equus caballus przewalskii*

Perissodactyla 6/6  
Equidae 3/3

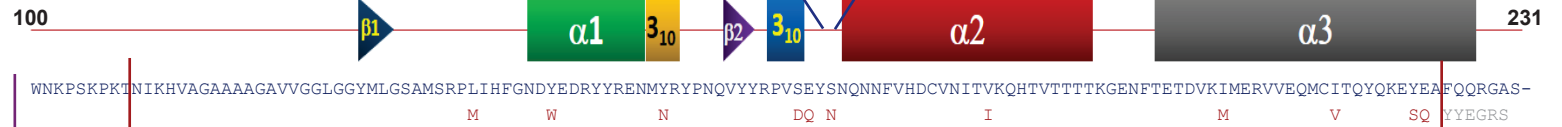

PrP sequence differs by 11 amino acids from the bank vole PrP (see in red)

No deletions  
No insertions  
No polymorphic variants found

Distinct primary sequence across species

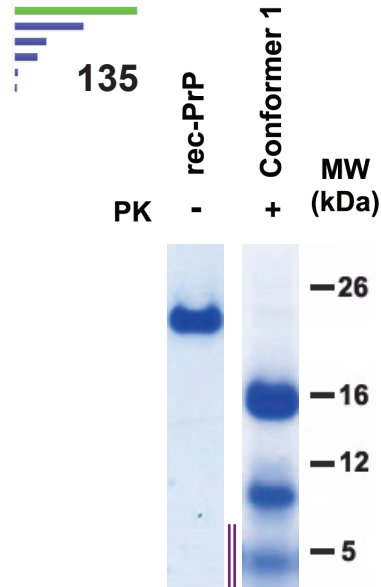

211 AA

1  
Conformers

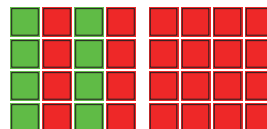

$T_m^{Exp}$ : ND

$\Delta\Delta G$ : -8.75

### *In vitro* studies

TgVole (1x) Not tested

Przewalski's horse Not tested

### *In vivo* studies

TgVole (1x) Not tested

Przewalski's horse Not tested

pLDDT  
[87.91]

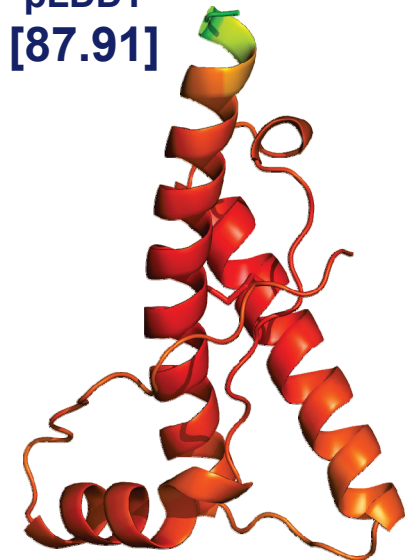



# Malayan tapir

GenBank: **BK063977**

P51%

14.3

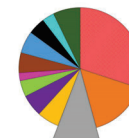

10-20

## Tapirus indicus

Perissodactyla 6/6

Tapiridae 2/2

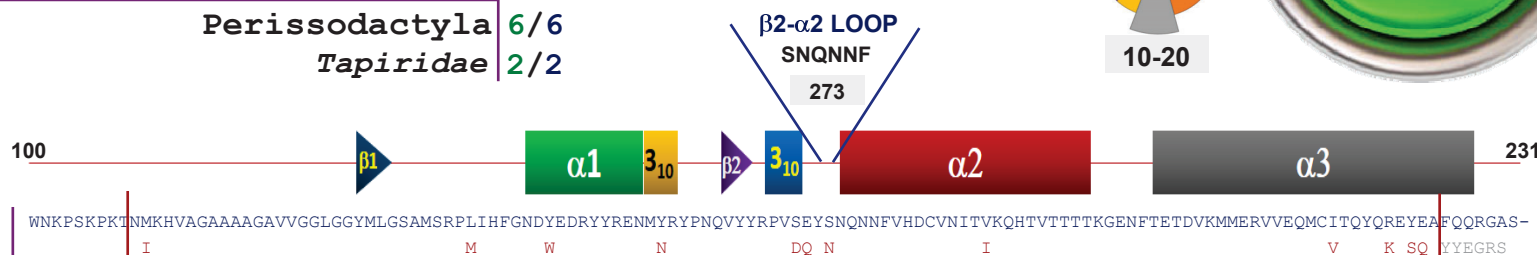

PrP sequence differs by 12 amino acids from the bank vole PrP (see in red)

- No deletions
- No insertions
- No polymorphic variants found

Distinct primary sequence across species

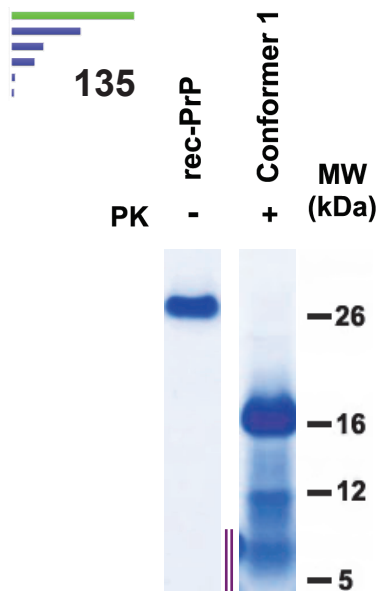

212 AA

1  
Conformers

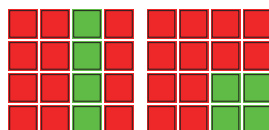

Tm<sup>Exp</sup>: ND

ΔΔG: -9.07

### In vitro studies

TgVole (1x) Not tested

Malayan tapir Not tested

### In vivo studies

TgVole (1x) Not tested

Malayan tapir Not tested

pLDDT [88.49]

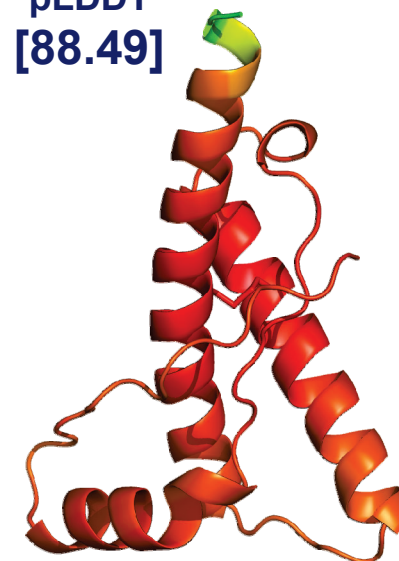

# South American tapir

GenBank: **BK063978**

P51%

14.3



## *Tapirus terrestris*

Perissodactyla 6/6  
Tapiridae 2/2

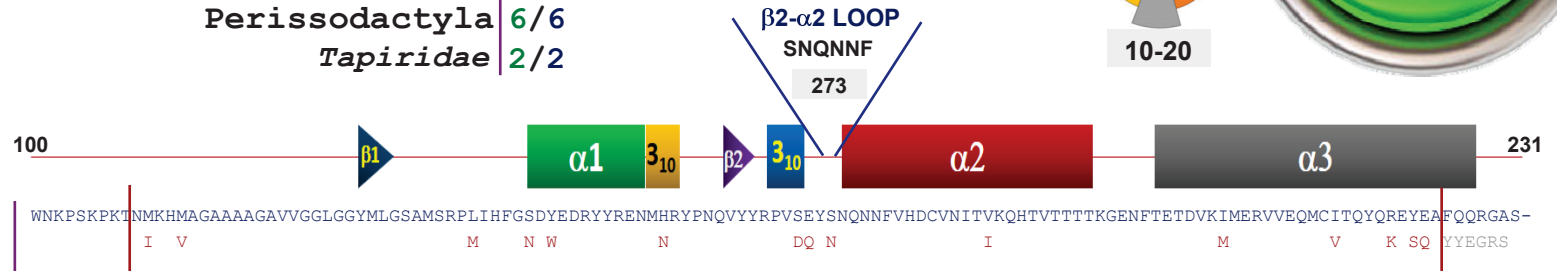

PrP sequence differs by 15 amino acids from the bank vole PrP (see in red)

- No deletions
- No insertions
- No polymorphic variants found

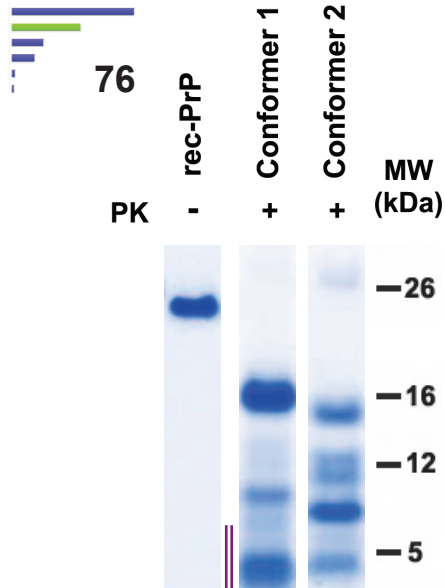

212 AA

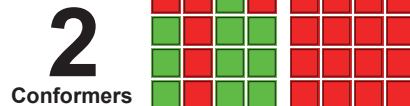

Tm<sup>Exp</sup>: ND  
ΔΔG: -7.74

### *In vitro* studies

- TgVole (1x) Not tested
- South American tapir Not tested

### *In vivo* studies

- TgVole (1x) Not tested
- South American tapir Not tested

pLDDT [88.48]

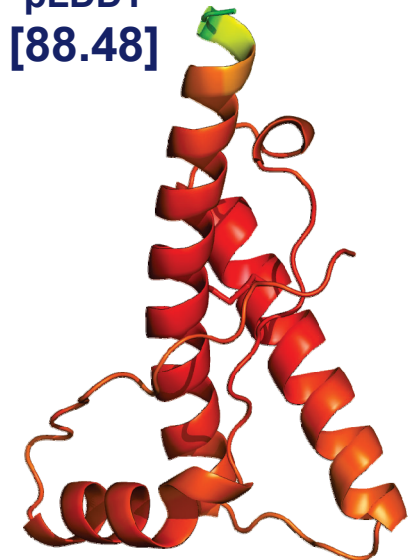

1 species sharing the same primary sequence

Baird's tapir  
*Tapirus bairdii*

1 species sharing the same primary sequence

# Pangolin

GenBank: XM\_017663893

P66%

38.6

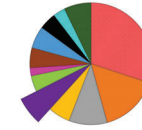

30-40

## Manis javanica

Pholidota 3/3  
Manidae 3/3

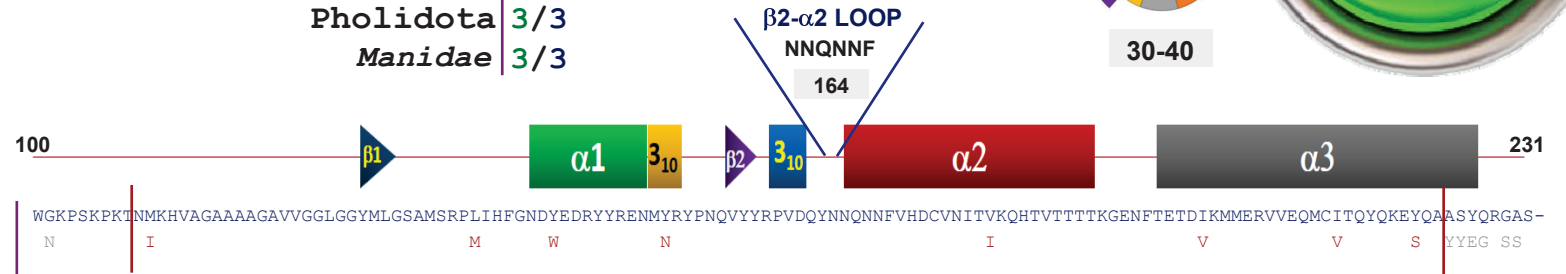

PrP sequence differs by 8 amino acids from the bank vole PrP (see in red)

- No deletions
- No insertions
- No polymorphic variants found

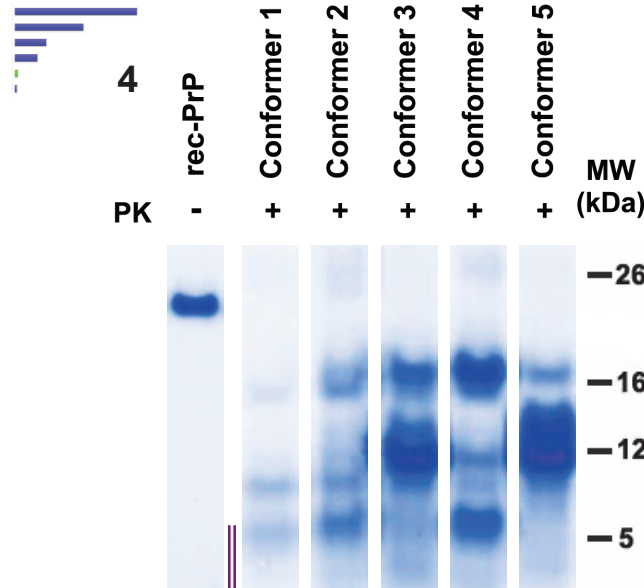

215 AA

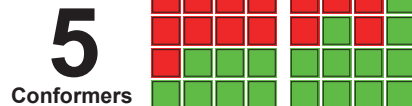

Tm<sup>Exp</sup>: ND  
ΔΔG: ND

### In vitro studies

- TgVole (1x) Ongoing
- Pangolin Not tested

### In vivo studies

- TgVole (1x) Ongoing
- Pangolin Not tested

pLDDT [87.58]

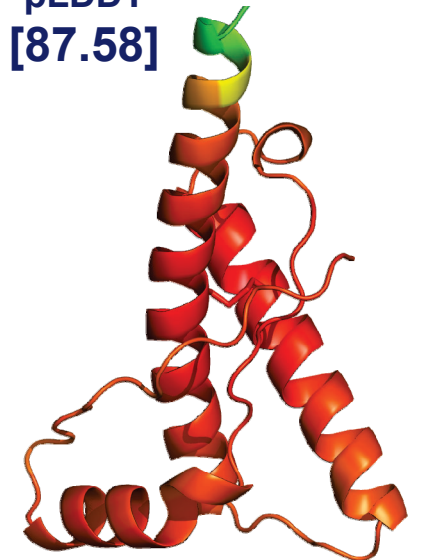

# Chinese pangolin

GenBank: **BK063962**

P56%

22.1



20-30

## *Manis pentadactyla*

Pholidota 3/3  
Manidae 3/3

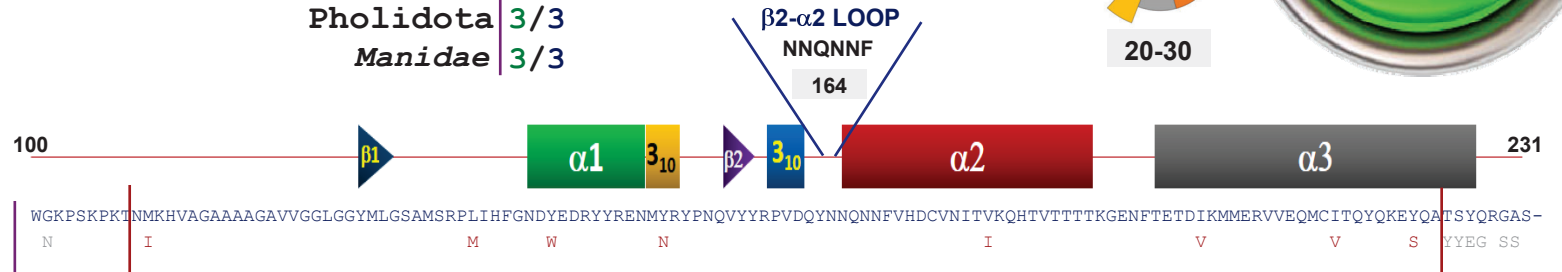

PrP sequence differs by 8 amino acids from the bank vole PrP (see in red)

No deletions  
No insertions  
No polymorphic variants found

Distinct primary sequence across species

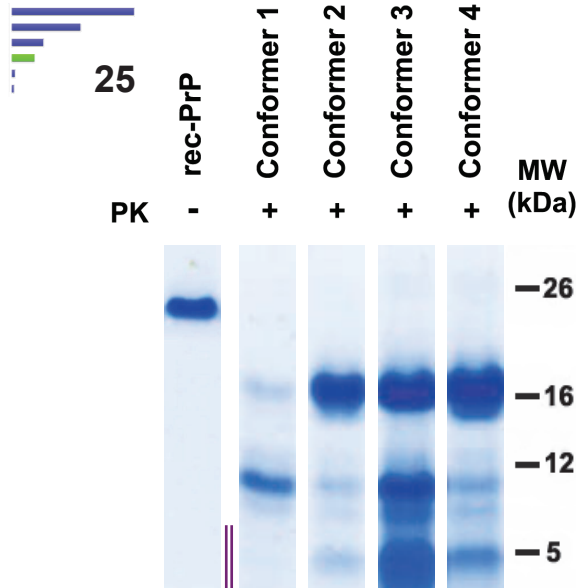

215 AA

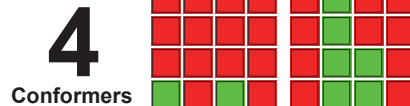

Tm<sup>Exp</sup>: ND  
ΔΔG: ND

### *In vitro* studies

TgVole (1x) Not tested

Chinese pangolin Not tested

### *In vivo* studies

TgVole (1x) Not tested

Chinese pangolin Not tested

pLDDT [85.06]

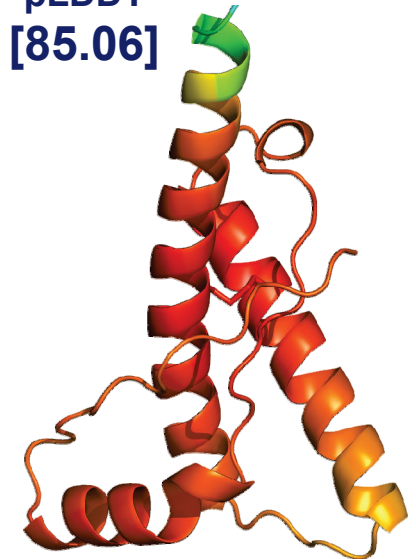

# Tree pangolin

GenBank: **BK063960**

P52%

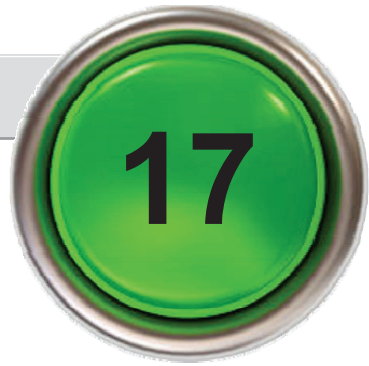

## *Manis tricuspis*

Pholidota 3/3  
Manidae 3/3

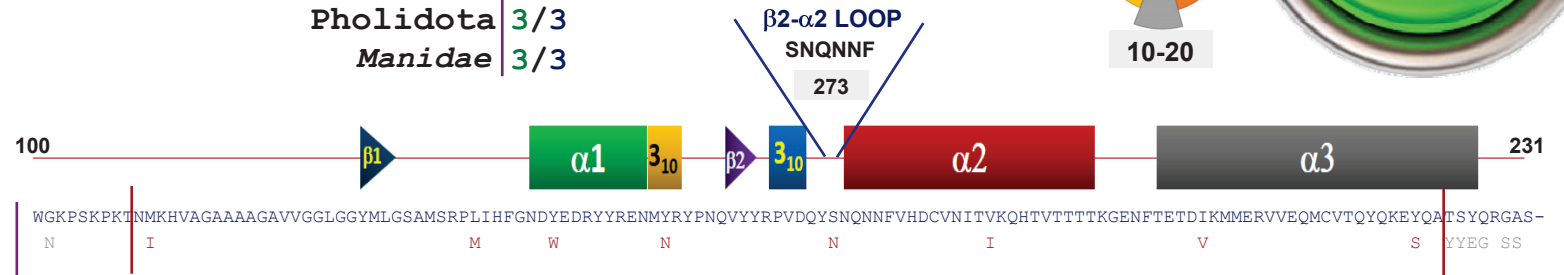

PrP sequence differs by 8 amino acids from the bank vole PrP (see in red)

No deletions  
No insertions  
No polymorphic variants found

Distinct primary sequence across species

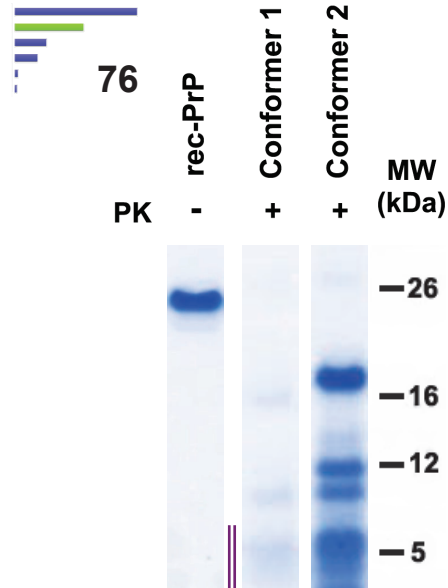

215 AA

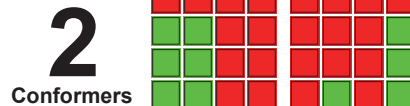

Tm<sup>Exp</sup>: ND  
ΔΔG: ND

### *In vitro* studies

TgVole (1x) Not tested

Tree pangolin Not tested

### *In vivo* studies

TgVole (1x) Not tested

Tree pangolin Not tested

pLDDT [85.51]

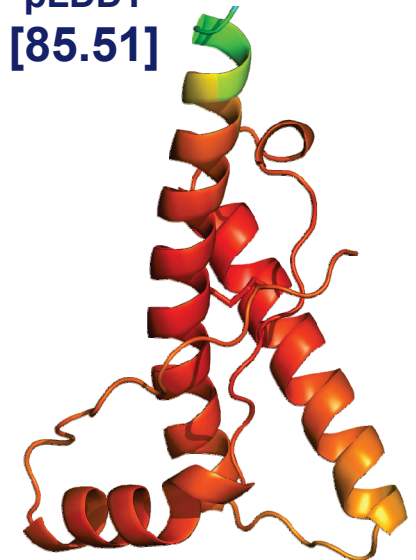

# Brown-throated sloth

GenBank: **BK063934**

P29%



0

## *Bradypus variegatus*

Pilosa 1/5

Bradypodidae 0/1

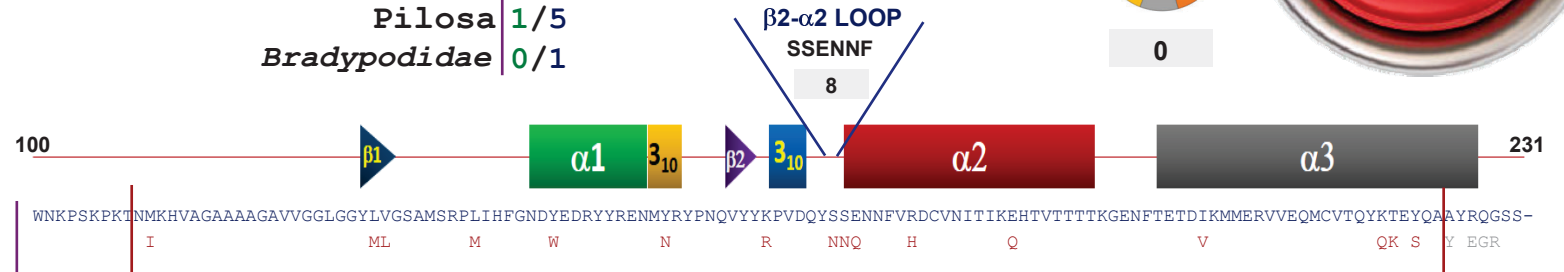

PrP sequence differs by 16 amino acids from the bank vole PrP (see in red)

- No deletions
- No insertions
- No polymorphic variants found

Tm<sup>Exp</sup>: ND

ΔΔG: **-11.57**

Distinct primary sequence across species

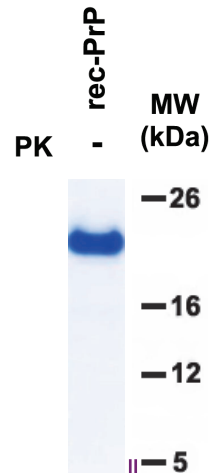

217 AA

0  
Conformers

**NO  
MISFOLDING**

*In vitro* studies

**NOT  
APPLICABLE**

*In vivo* studies

**NOT  
APPLICABLE**

pLDDT  
[85.17]

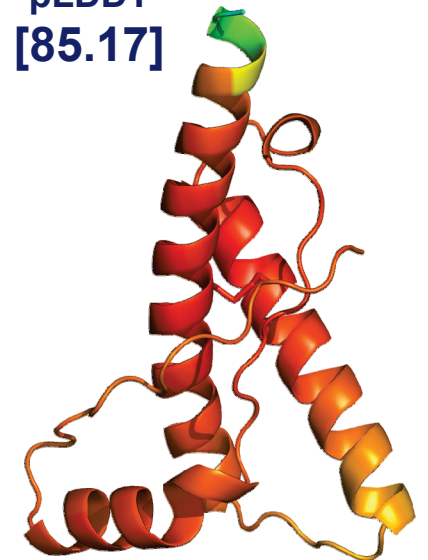

1 species sharing the same primary sequence

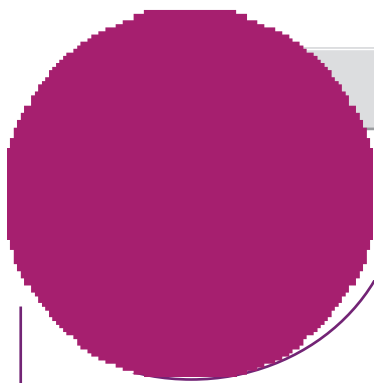

# Linnaeus's two-toed sloth

GenBank: **BK063945**

## *Choloepus didactylus*

Pilosa 1/5

Megalonychidae 0/1

P29%



0

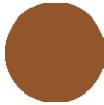

Hoffmann's two-toed sloth  
*Choloepus hoffmanni*

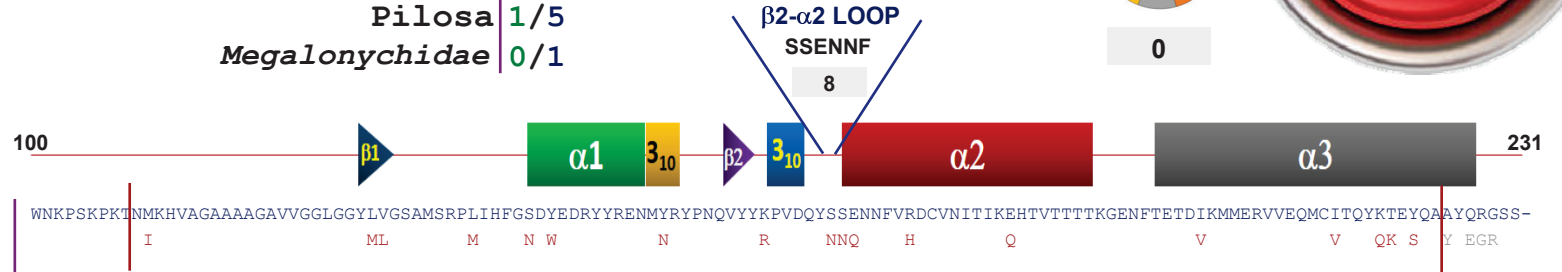

PrP sequence differs by 18 amino acids from the bank vole PrP (see in red)

- No deletions
- No insertions
- No polymorphic variants found

Tm<sup>Exp</sup>: ND

ΔΔG: -14.14

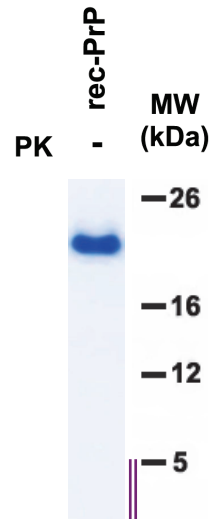

217 AA

0 Conformers

**NO MISFOLDING**

*In vitro* studies

**NOT APPLICABLE**

*In vivo* studies

**NOT APPLICABLE**

pLDDT [86.49]

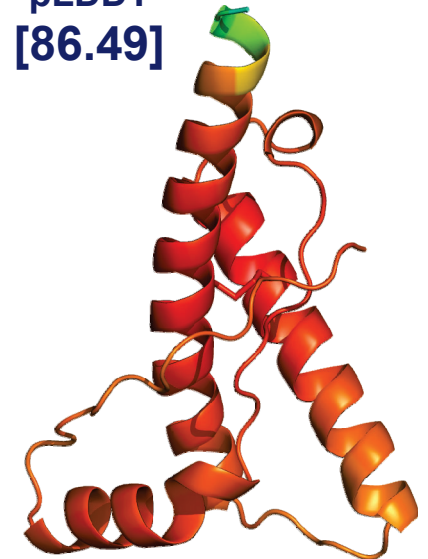

# Silky anteater

GenBank: AY133063

P29%



0

## Cyclopes didactylus

Pilosa 1/5

Cyclopedidae 0/1

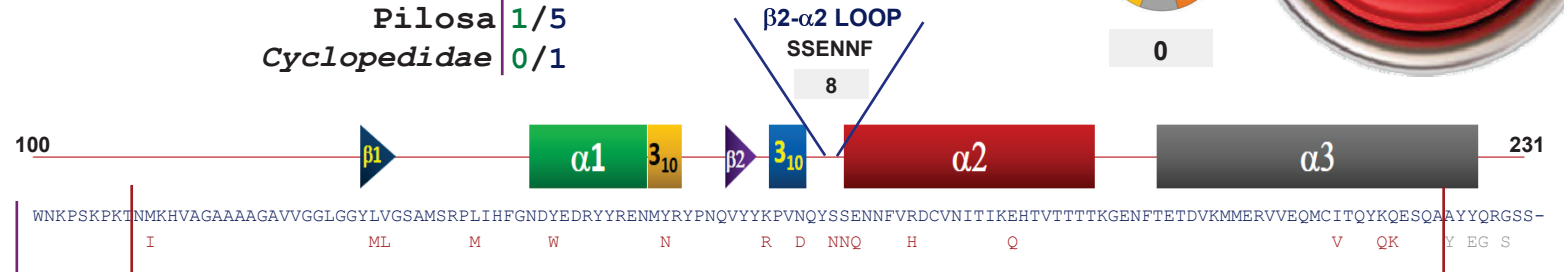

PrP sequence differs by 16 amino acids from the bank vole PrP (see in red)

- No deletions
- No insertions
- No polymorphic variants found

Tm<sup>Exp</sup>: ND

ΔΔG: ND

Distinct primary sequence across species

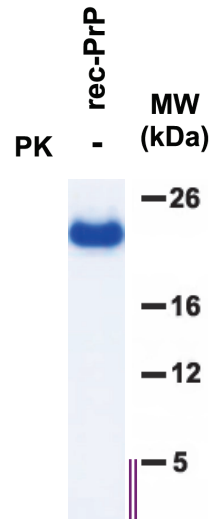

216 AA

0  
Conformers

**NO  
MISFOLDING**

*In vitro* studies

**NOT  
APPLICABLE**

*In vivo* studies

**NOT  
APPLICABLE**

pLDDT  
[87.28]

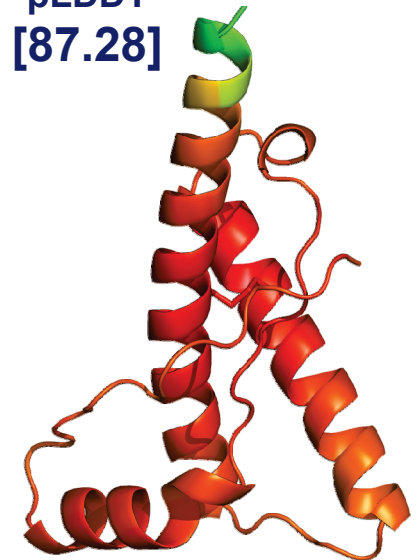



# Giant anteater

GenBank: **BK063979**

P29%



0

## *Myrmecophaga tridactyla*

*Pilosa* 1/5

*Myrmecophagidae* 1/2

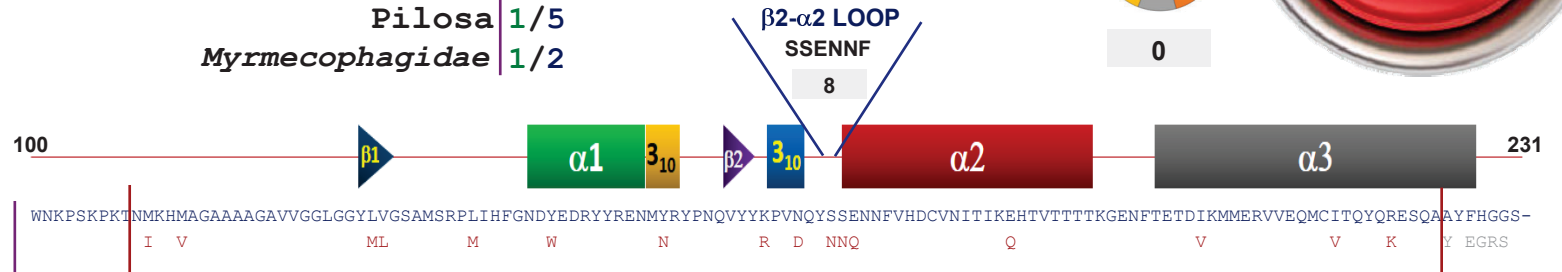

PrP sequence differs by 16 amino acids from the bank vole PrP (see in red)

- No deletions
- No insertions
- No polymorphic variants found

Tm<sup>Exp</sup>: ND

ΔΔG: **-15.61**

Distinct primary sequence across species

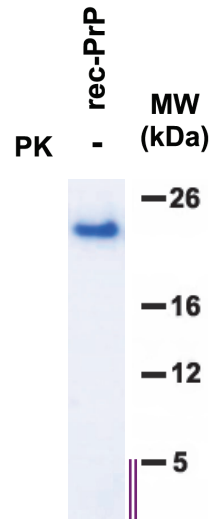

214 AA

0  
Conformers

**NO  
MISFOLDING**

*In vitro* studies

**NOT  
APPLICABLE**

*In vivo* studies

**NOT  
APPLICABLE**

pLDDT  
[86.38]

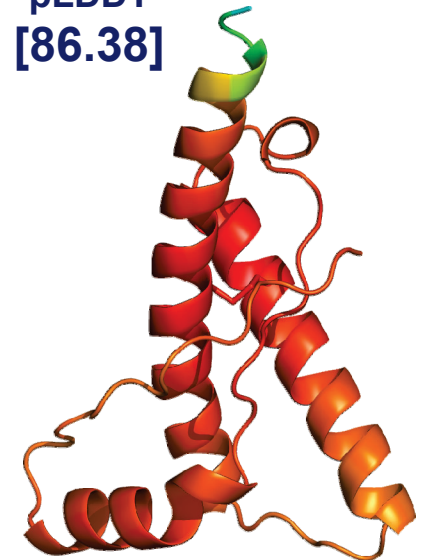

# Southern tamandua

GenBank: **BK063980**

P65%

**36.6**

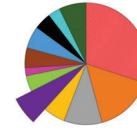

30-40

## Tamandua tetradactyla

Pilosa 1/5

Myrmecophagidae 1/2

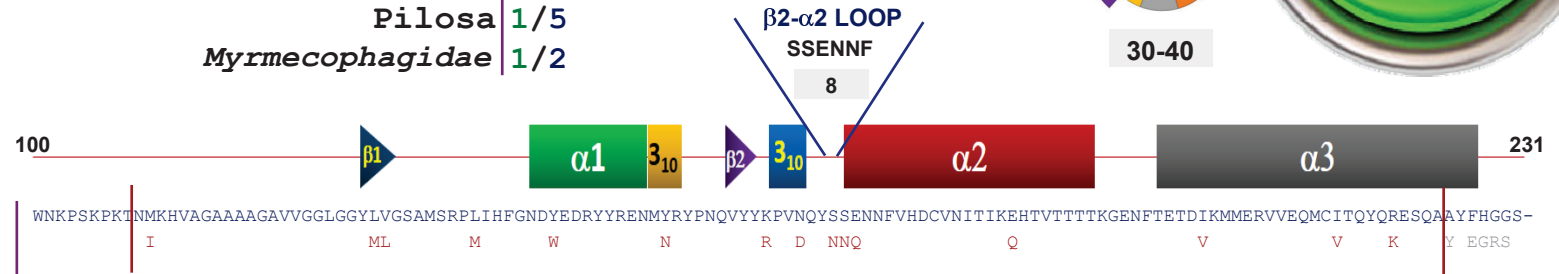

PrP sequence differs by 15 amino acids from the bank vole PrP (see in red)

- No deletions
- No insertions
- No polymorphic variants found

Distinct primary sequence across species

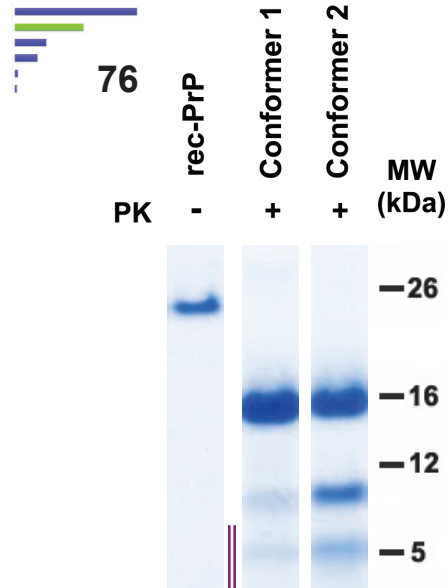

214 AA

**2**  
Conformers

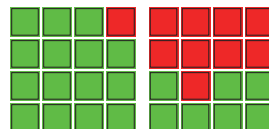

Tm<sup>Exp</sup>: ND

ΔΔG: **-10.89**

### In vitro studies

- TgVole (1x) Not tested
- Southern tamandua Not tested

### In vivo studies

- TgVole (1x) Not tested
- Southern tamandua Not tested

pLDDT [86.33]

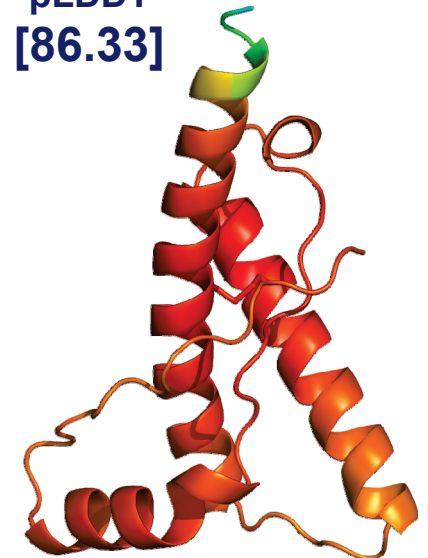

# Red-handed howler

GenBank: AY765382

P75%

63.6



60-70

## *Alouatta belzebul*

Primates 35/45  
Atelidae 3/5

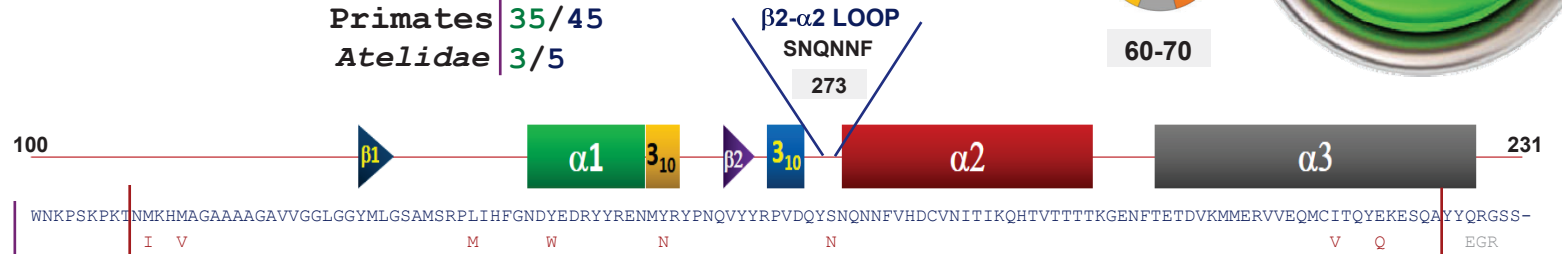

PrP sequence differs by 8 amino acids from the bank vole PrP (see in red)

No deletions  
No insertions  
No polymorphic variants found

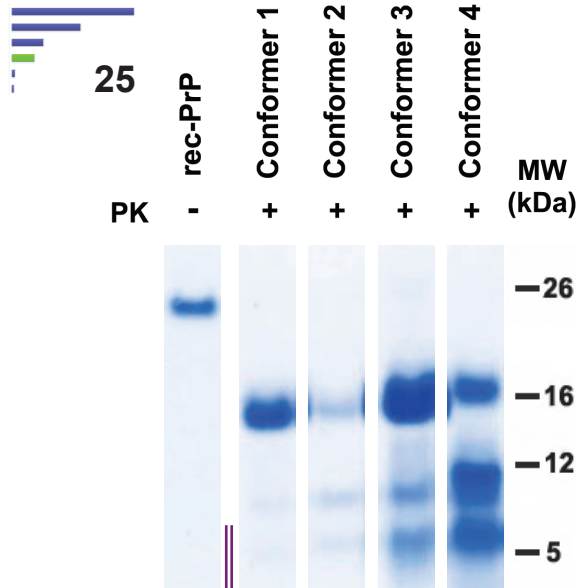

210 AA

4  
Conformers

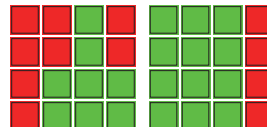

Tm<sup>Exp</sup>: ND

ΔΔG: -0.92

### *In vitro* studies

TgVole (1x) Not tested

Red-handed howler Not tested

### *In vivo* studies

TgVole (1x) Not tested

Red-handed howler Not tested

pLDDT [87.82]

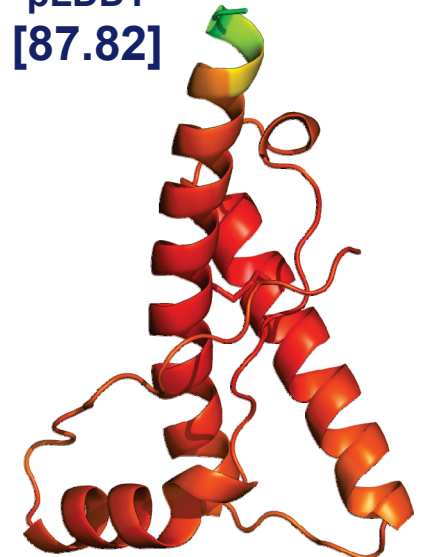

1 species sharing the same primary sequence

Mantled howler  
*Alouatta palliata*

# Gray-bellied night monkey

GenBank: AY765387

P29%



0

## *Aotus lemurinus*

Primates 35/45  
Aotidae 1/2

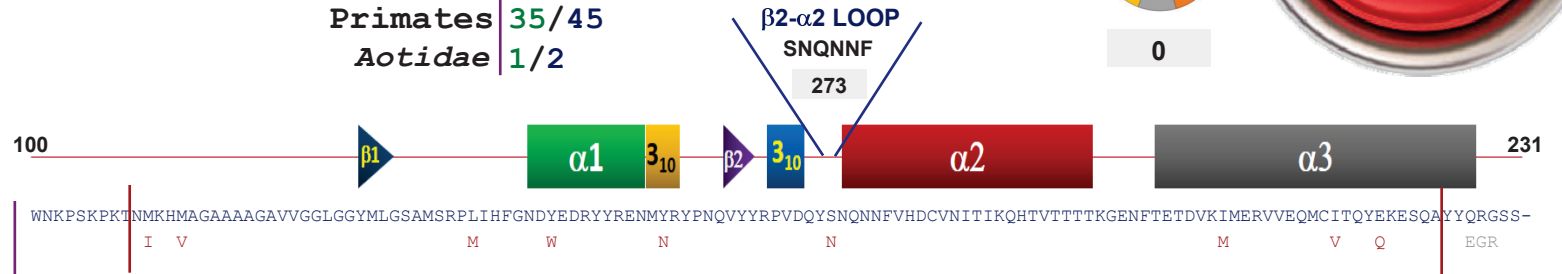

PrP sequence differs by 9 amino acids from the bank vole PrP (see in red)

- No deletions
- No insertions
- No polymorphic variants found

$T_m^{Exp}$ : ND

$\Delta\Delta G$ : 1.07

1 species sharing the same primary sequence

Nancy Ma's night monkey  
*Aotus nancymae*

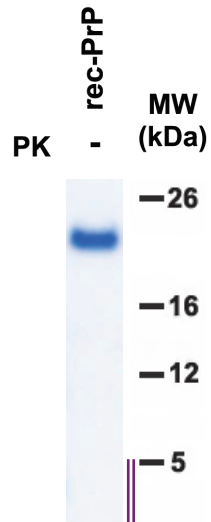

210 AA

0  
Conformers

**NO MISFOLDING**

*In vitro* studies

**NOT APPLICABLE**

*In vivo* studies

**NOT APPLICABLE**

pLDDT [84.39]

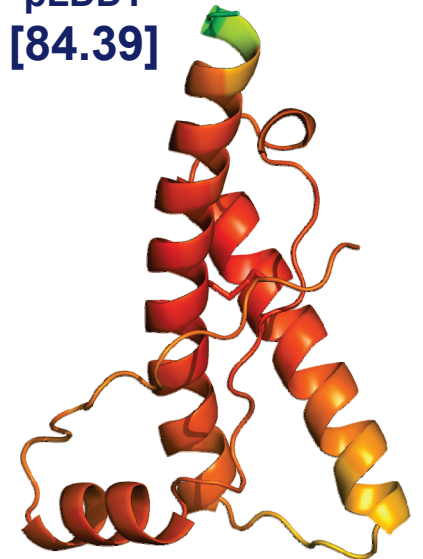

Distinct primary sequence across species

# Three-striped night monkey

GenBank: U08293

P70%

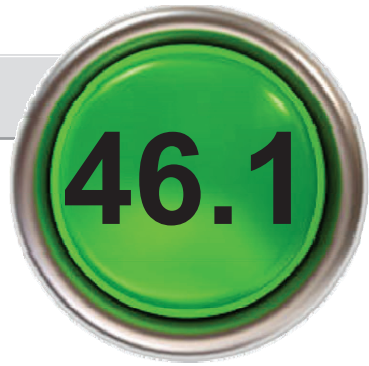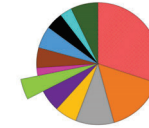

40-50

## *Aotus trivirgatus*

Primates 35/45  
Aotidae 1/2

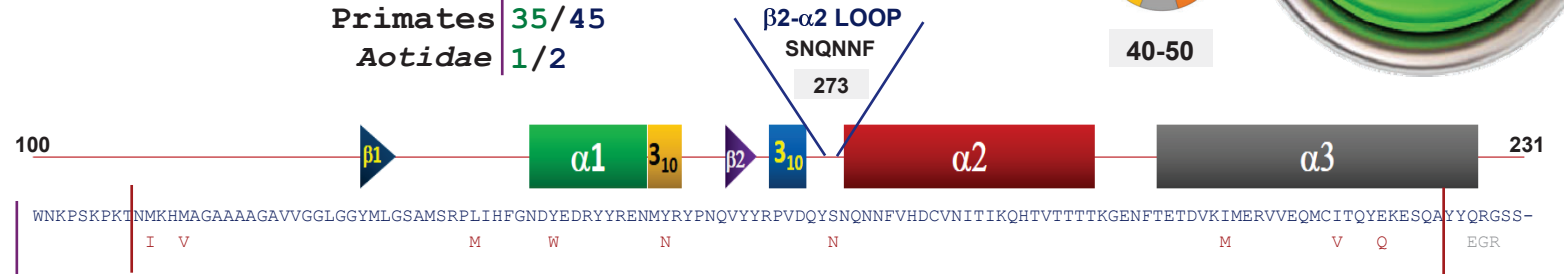

PrP sequence differs by 9 amino acids from the bank vole PrP (see in red)

- No deletions
- No insertions
- No polymorphic variants found

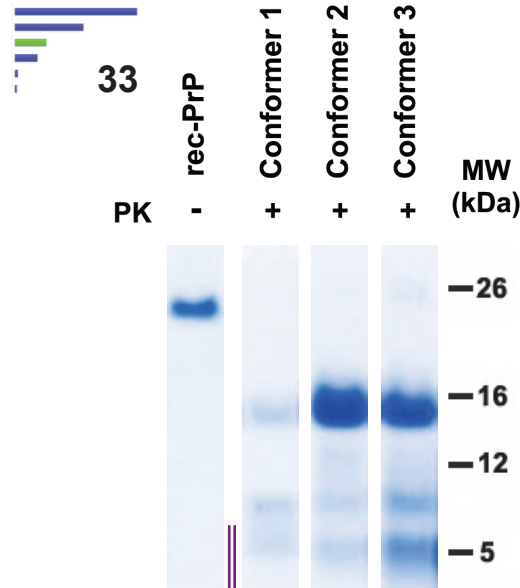

210 AA

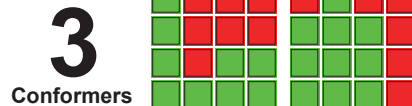

Tm<sup>Exp</sup>: ND  
ΔΔG: -5.4

### *In vitro* studies

- TgVole (1x) Not tested
- Three-striped night monkey Not tested

### *In vivo* studies

- TgVole (1x) Not tested
- Three-striped night monkey Not tested

pLDDT [86.79]

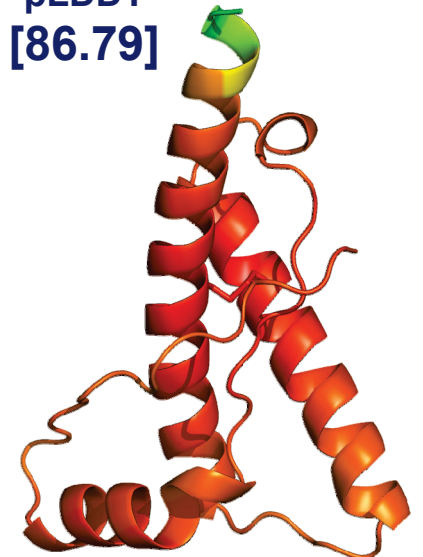

# Geoffroy's spider monkey

GenBank: U08309

P56%

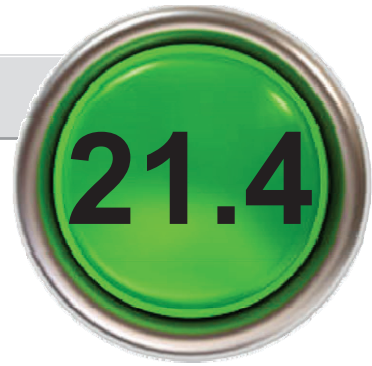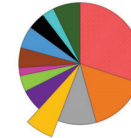

20-30

## *Ateles geoffroyi*

Primates 35/45  
Atelidae 3/5

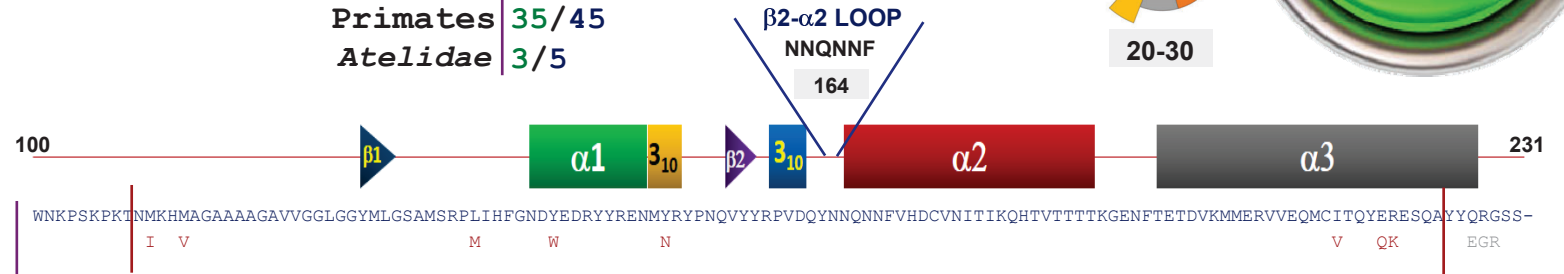

PrP sequence differs by 8 amino acids from the bank vole PrP (see in red)

No deletions  
No insertions  
No polymorphic variants found

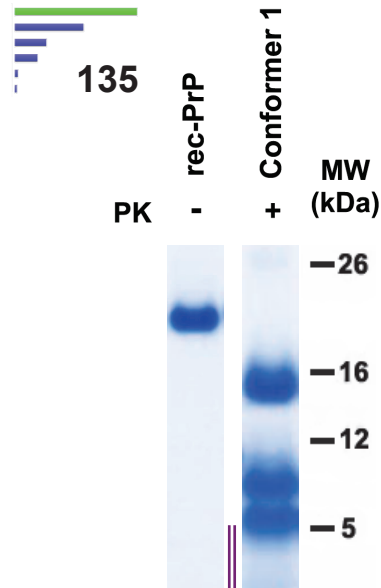

202 AA

1  
Conformers

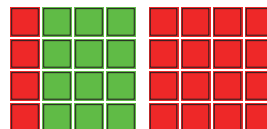

Tm<sup>Exp</sup>: ND

ΔΔG: -6.77

### *In vitro* studies

TgVole (1x) Not tested

Geoffroy's spider monkey Not tested

### *In vivo* studies

TgVole (1x) Not tested

Geoffroy's spider monkey Not tested

pLDDT  
[85.45]

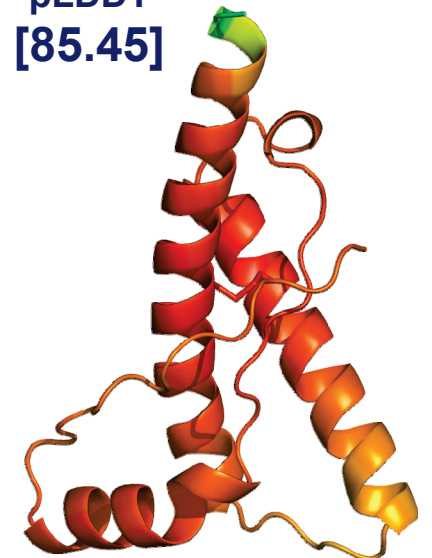

1 species sharing the same primary sequence

# Red-faced spider monkey

GenBank: U15164

P29%



0

## *Ateles paniscus*

Primates 35/45  
Atelidae 3/5

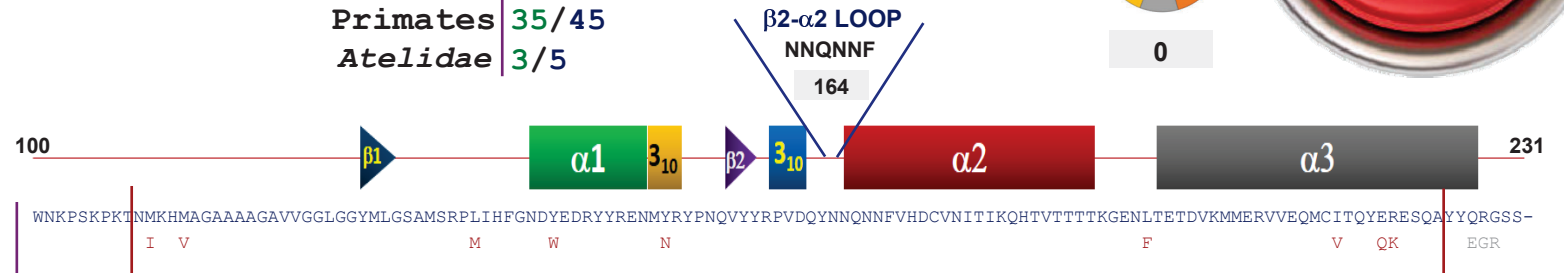

PrP sequence differs by 9 amino acids from the bank vole PrP (see in red)

- No deletions
- No insertions
- No polymorphic variants found

Tm<sup>Exp</sup>: ND

ΔΔG: -5.68

Distinct primary sequence across species

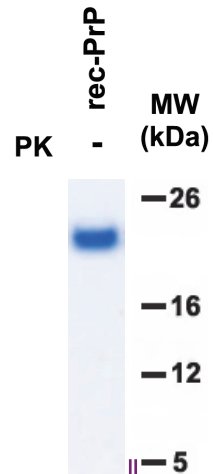

210 AA

0  
Conformers

NO  
MISFOLDING

*In vitro* studies

NOT  
APPLICABLE

*In vivo* studies

NOT  
APPLICABLE

pLDDT  
[86.16]

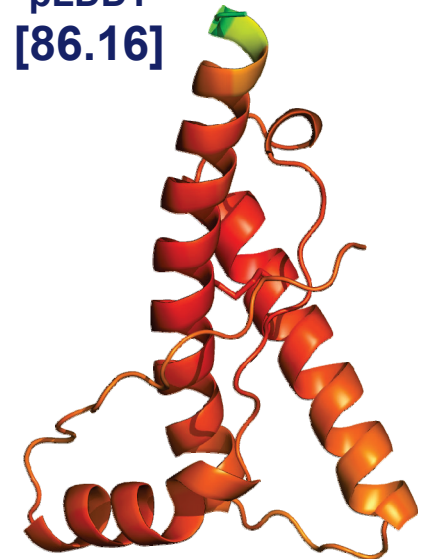

# Southern muriqui

GenBank: AY765383

## Brachyteles arachnoides

Primates 35/45  
Atelidae 3/5

P29%



0

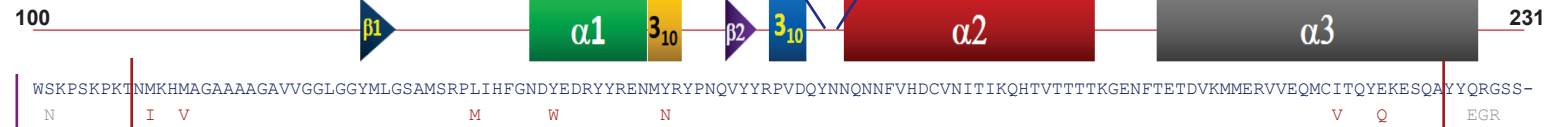

PrP sequence differs by 7 amino acids from the bank vole PrP (see in red)

No deletions  
No insertions  
No polymorphic variants found

$T_m^{Exp}$ : ND

$\Delta\Delta G$ : -4.43

Distinct primary sequence across species

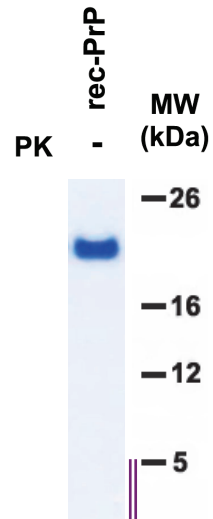

210 AA

0  
Conformers

NO  
MISFOLDING

*In vitro* studies

NOT  
APPLICABLE

*In vivo* studies

NOT  
APPLICABLE

pLDDT  
[85.32]

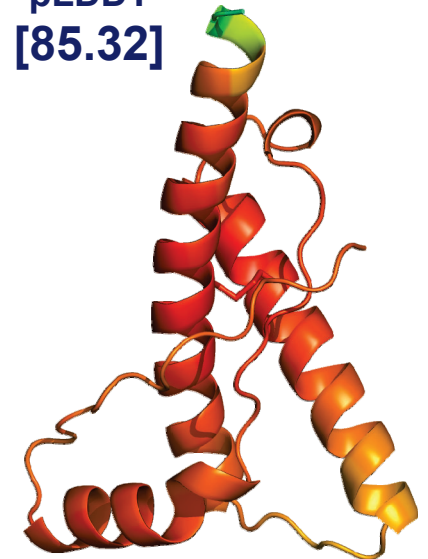



Distinct primary sequence across species

# White-eared titi

GenBank: **BK064142**

P82%

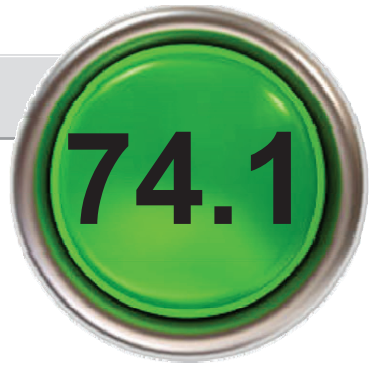

70-80

## *Callicebus donacophilus*

Primates 35/45  
Pitheciidae 3/4

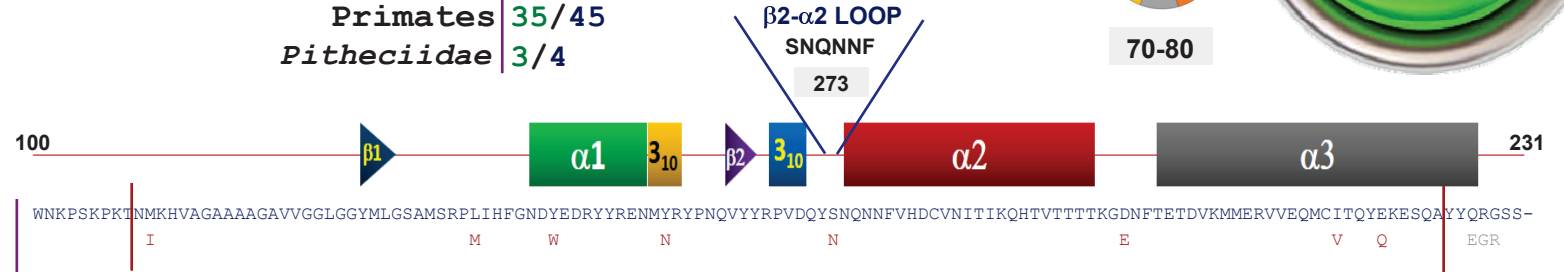

PrP sequence differs by 8 amino acids from the bank vole PrP (see in red)

No deletions  
No insertions  
No polymorphic variants found

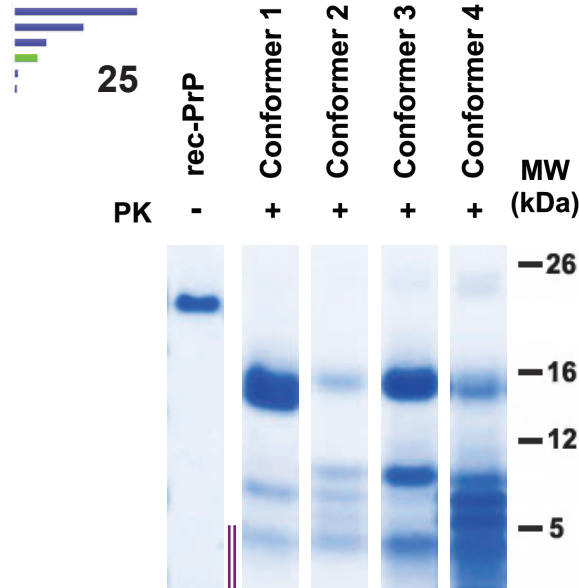

211 AA

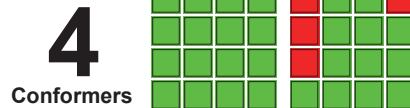

Tm<sup>Exp</sup>: ND  
ΔΔG: 4.73

### *In vitro* studies

TgVole (1x) Not tested  
White-eared titi Not tested

### *In vivo* studies

TgVole (1x) Not tested  
White-eared titi Not tested

pLDDT [84.42]

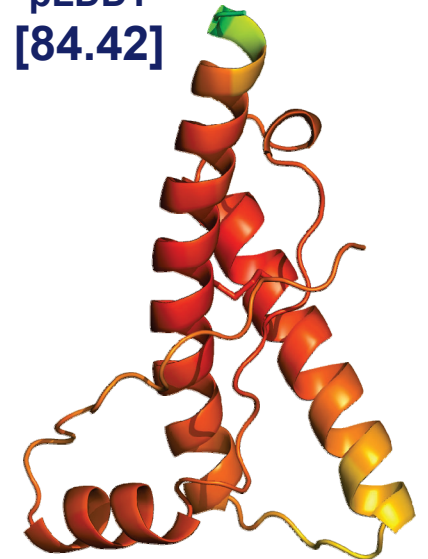

Distinct primary sequence across species

# Red-bellied titi

GenBank: U08312

P76%

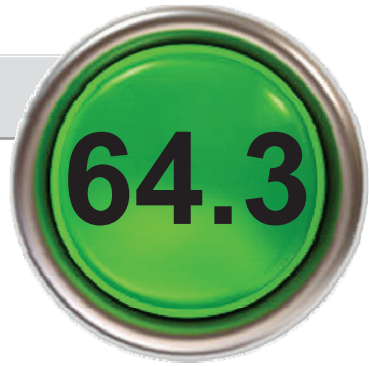

60-70

## Callicebus moloch

Primates 35/45  
Pitheciidae 3/4

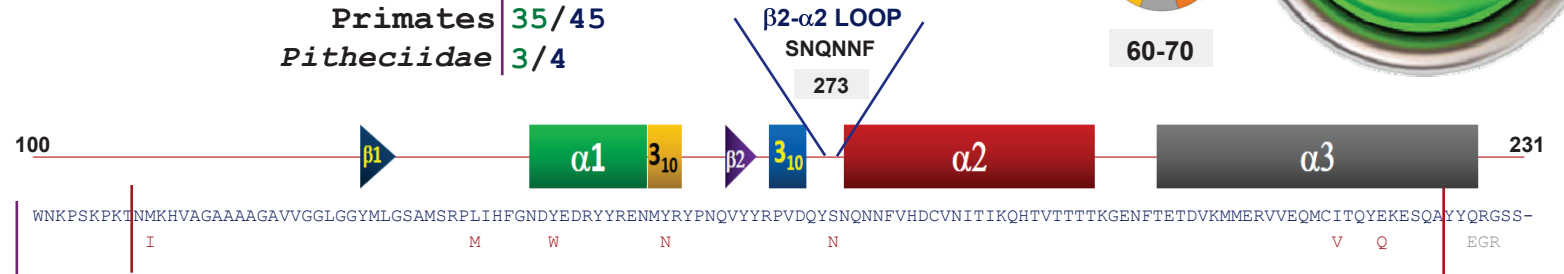

PrP sequence differs by 7 amino acids from the bank vole PrP (see in red)

No deletions  
No insertions  
No polymorphic variants found

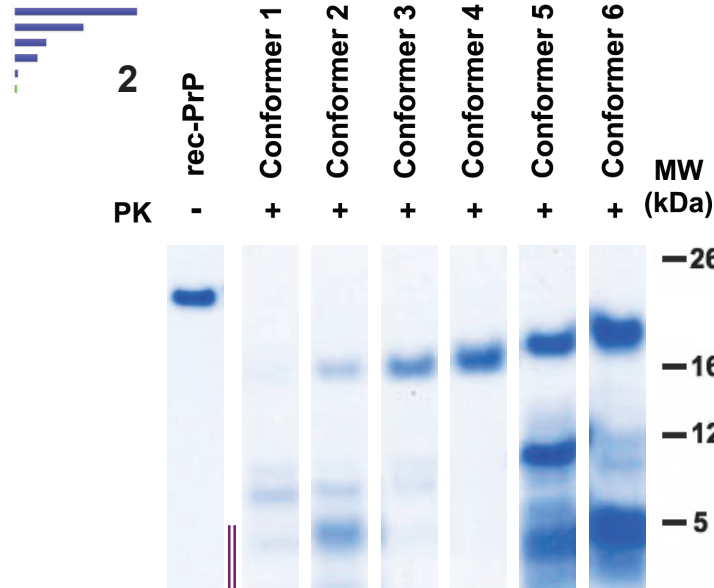

211 AA

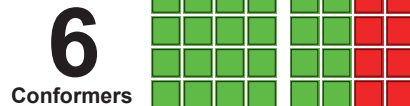

Tm<sup>Exp</sup>: ND  
 $\Delta\Delta G$ : 3.98

### In vitro studies

TgVole (1x) Not tested  
Red-bellied titi Not tested

### In vivo studies

TgVole (1x) Not tested  
Red-bellied titi Not tested

pLDDT [85.07]

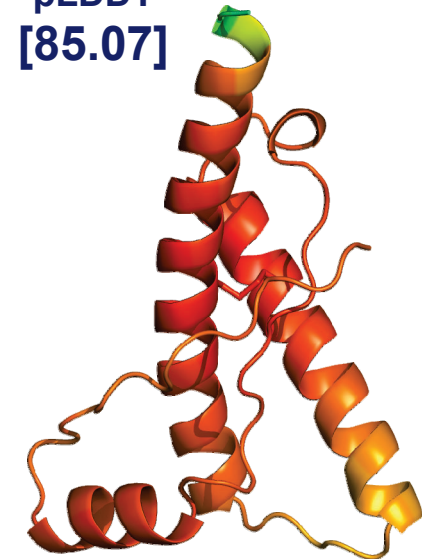

# Common marmoset

GenBank: XM\_008995703

P77%

67.5



60-70

## Callithrix jacchus

Primates 35/45  
Cebidae 7/8

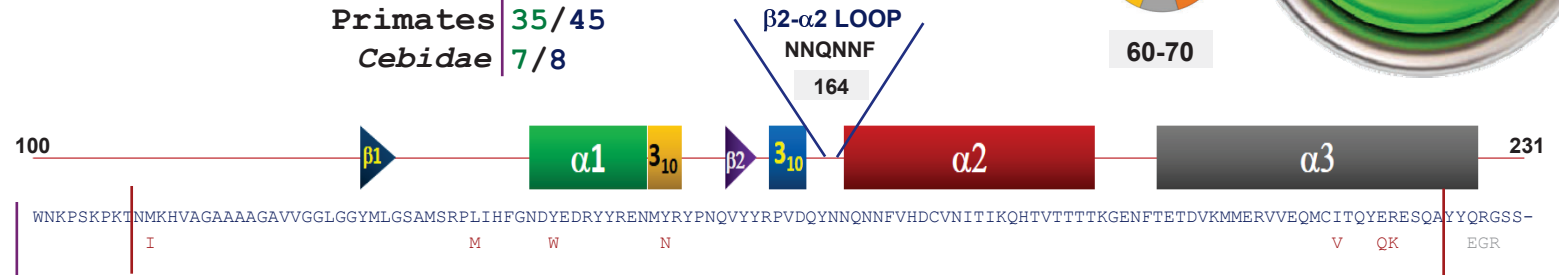

PrP sequence differs by 7 amino acids from the bank vole PrP (see in red)

No deletions  
No insertions  
No polymorphic variants found

4 species sharing the same primary sequence

- Goeldi's marmoset *Callimico goeldii*
- Silvery marmoset *Callithrix argentata*
- White-headed marmoset *Callithrix geoffroyi*
- Pygmy marmoset *Callithrix pygmaea*

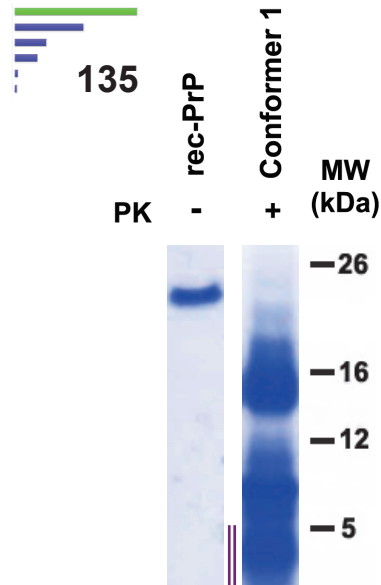

210 AA

1  
Conformers

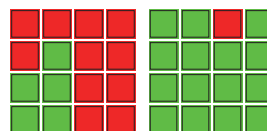

Tm<sup>Exp</sup>: ND

ΔΔG: -4.16

### In vitro studies

TgVole (1x) Not tested

Common marmoset Not tested

### In vivo studies

TgVole (1x) Not tested

Common marmoset Not tested

pLDDT [85.76]

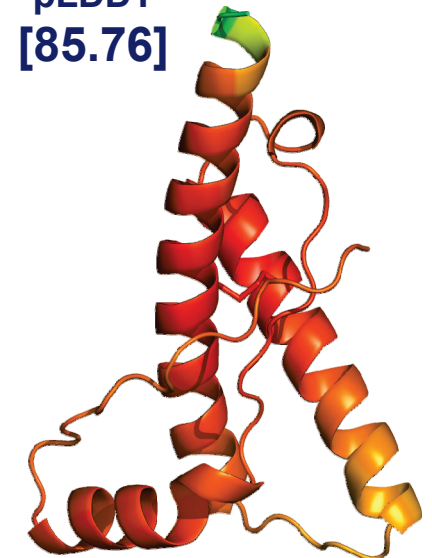

2 species sharing the same primary sequence

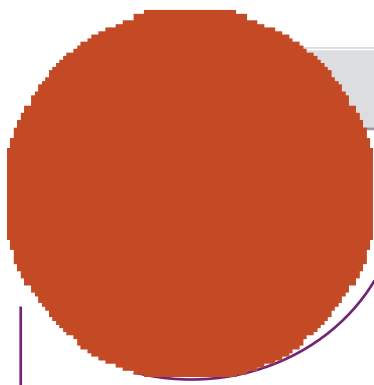

**Panamanian white-faced capuchin**

GenBank: XM\_017524036

P39%

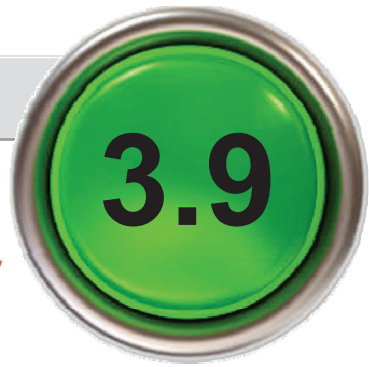

0-10

**Cebus capucinus**

Primates 35/45  
Cebidae 7/8

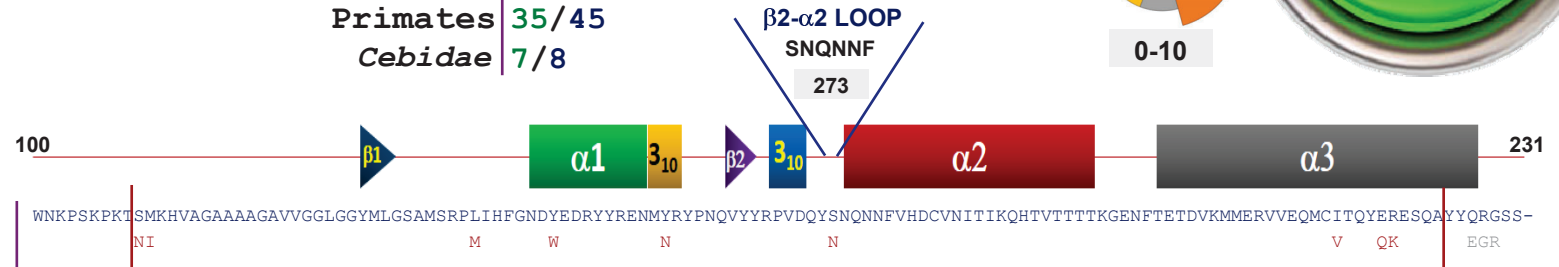

PrP sequence differs by 9 amino acids from the bank vole PrP (see in red)

- No deletions
- No insertions
- No polymorphic variants found

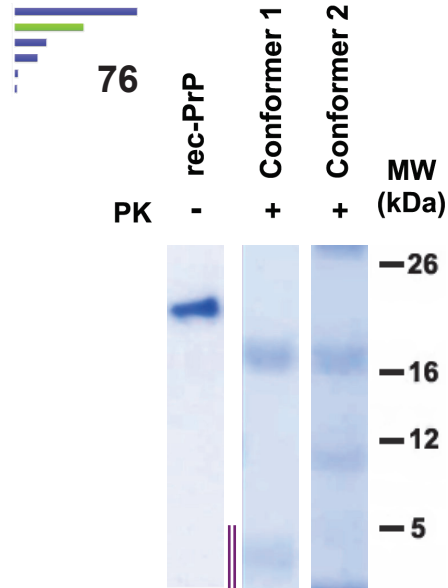

210 AA

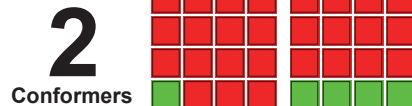

Tm<sup>Exp</sup>: ND  
ΔΔG: -2.68

**In vitro studies**

- TgVole (1x) Not tested
- Panamanian white-faced Not tested

**In vivo studies**

- TgVole (1x) Not tested
- Panamanian white-faced Not tested

pLDDT [86.8]

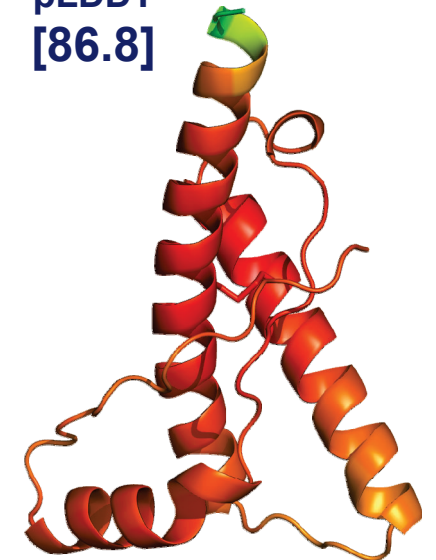

# Sooty mangabey

GenBank: XM\_012052159

P45%

8.9



0-10

## Cercocebus atys

Primates 35/45

Cercopithecidae 7/7

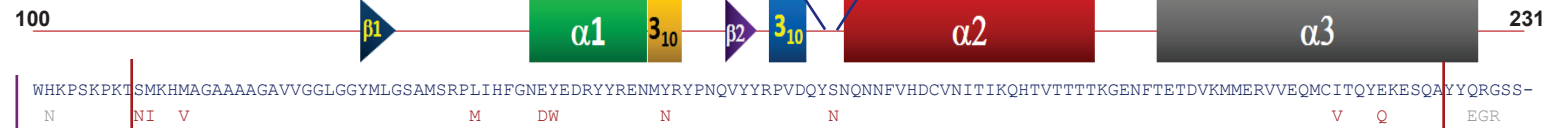

PrP sequence differs by 10 amino acids from the bank vole PrP (see in red)

- No deletions
- No insertions
- No polymorphic variants found

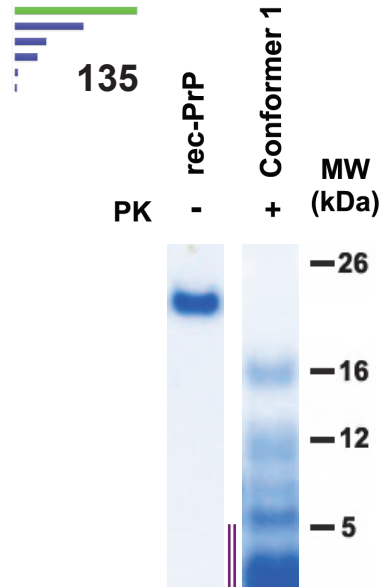

211 AA

1  
Conformers



Tm<sup>Exp</sup>: ND

ΔΔG: -9.39

### In vitro studies

TgVole (1x) Not tested

Sooty mangabey Not tested

### In vivo studies

TgVole (1x) Not tested

Sooty mangabey Not tested

pLDDT  
[85.75]

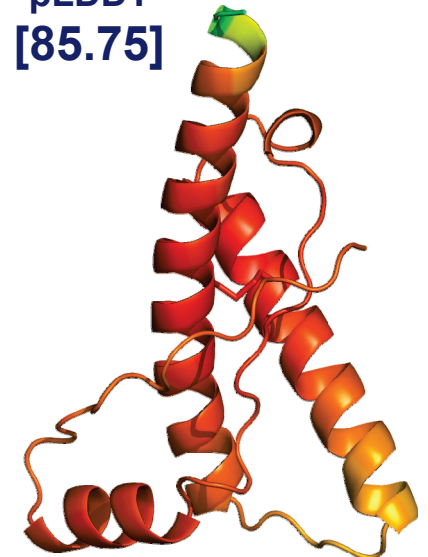

1 species sharing the same primary sequence

Collared mangabey  
*Cercocebus torquatus*

# Fat-tailed dwarf lemur

GenBank: **BK063936**

## *Cheirogaleus medius*

Primates 35/45

*Cheirogaleidae* 1/4

P29%



0

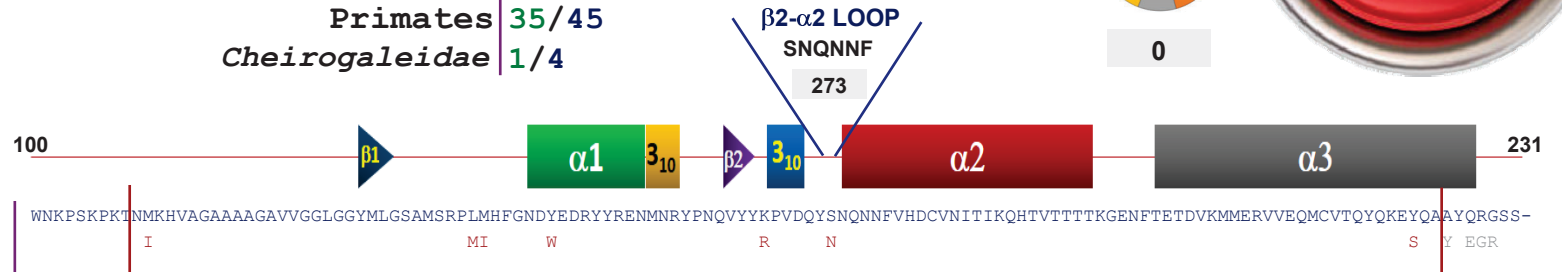

PrP sequence differs by 7 amino acids from the bank vole PrP (see in red)

- No deletions
- No insertions
- No polymorphic variants found

Tm<sup>Exp</sup>: ND

ΔΔG: 10.05

Distinct primary sequence across species

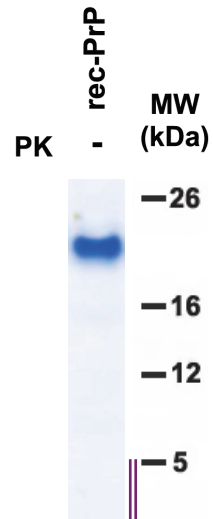

**NO MISFOLDING**

212 AA

0 Conformers

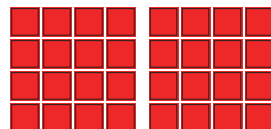

*In vitro* studies

**NOT APPLICABLE**

*In vivo* studies

**NOT APPLICABLE**

pLDDT [84.91]

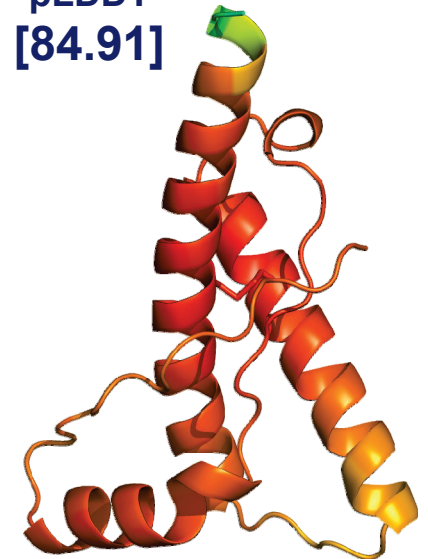

# Black bearded saki

GenBank: AY765380

P31%

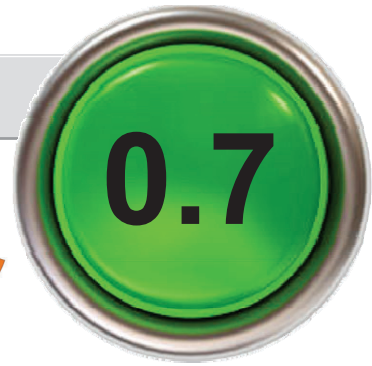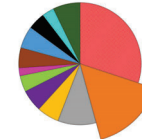

0-10

## *Chiropotes satanas*

Primates 35/45  
Pitheciidae 3/4

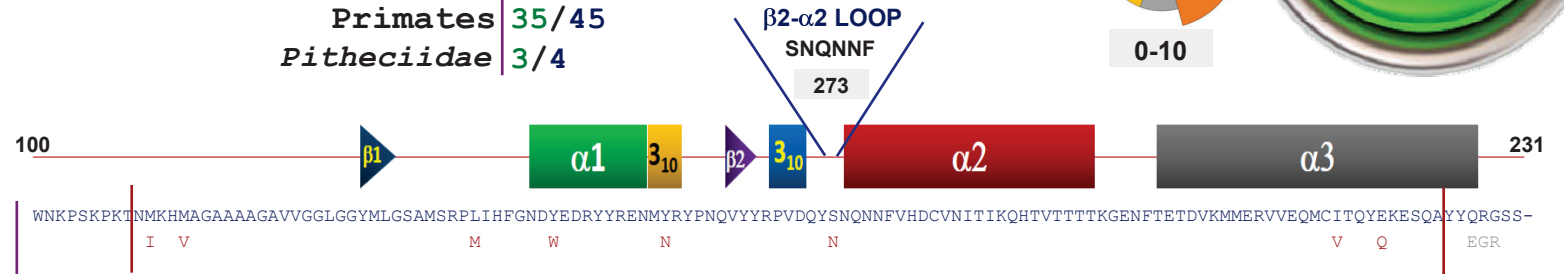

PrP sequence differs by 8 amino acids from the bank vole PrP (see in red)

No deletions  
No insertions  
No polymorphic variants found

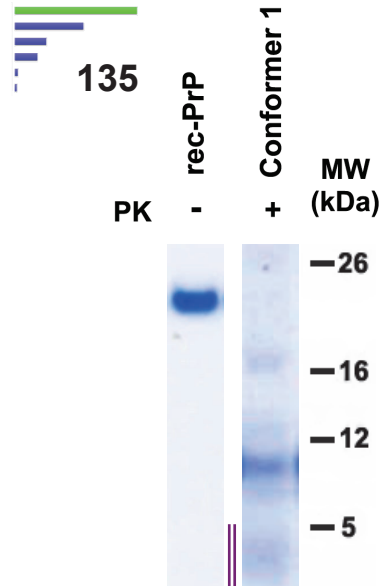

211 AA

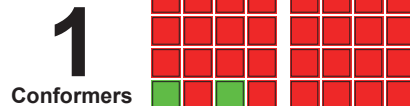

Tm<sup>Exp</sup>: ND

ΔΔG: -3.52

### *In vitro* studies

TgVole (1x) Not tested

Black bearded saki Not tested

### *In vivo* studies

TgVole (1x) Not tested

Black bearded saki Not tested

pLDDT [85.14]

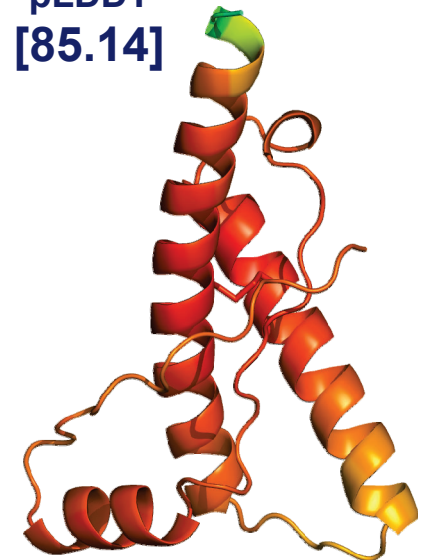

1 species sharing the same primary sequence

Bald uakari  
*Cacajao calvus*

# Angola colobus

GenBank: XM\_011941048

P42%

8.4



0-10

## Colobus angolensis palliatus

Primates 35/45

Cercopithecidae 7/7

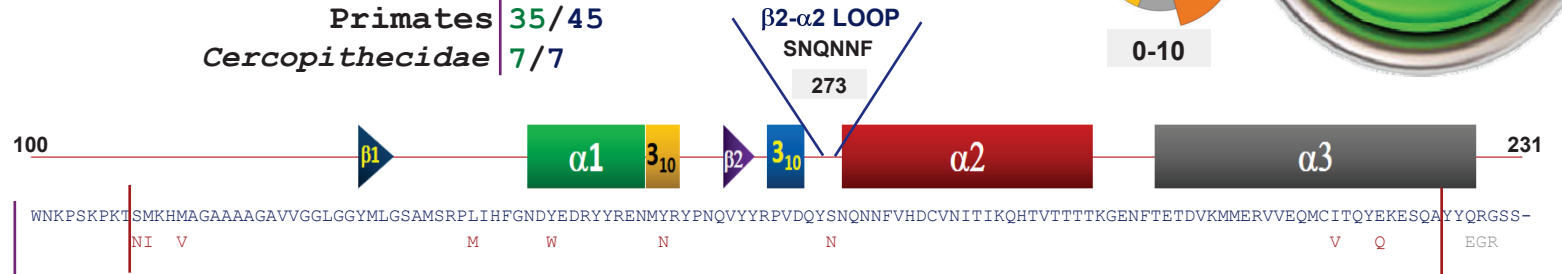

PrP sequence differs by 9 amino acids from the bank vole PrP (see in red)

No deletions  
No insertions  
No polymorphic variants found

11 species sharing the same primary sequence

- Black snub-nosed monkey**  
*Rhinopithecus bieti*
- Anaola colobus**  
*Colobus angolensis palliatus*
- Mantled quereza**  
*Colobus guereza*
- Francois' lanaur**  
*Trachypithecus francoisi*
- Golden snub-nosed monkey**  
*Rhinopithecus roxellana*
- Northern plains arav lanaur**  
*Semnopithecus entellus*
- Proboscis monkey**  
*Nasalis larvatus*
- Red-shanked douc**  
*Pygathrix nemaeus*
- Phavre's leaf monkey**  
*Trachypithecus phayrei crepuscula*
- Black-shanked douc**  
*Pygathrix nigripes*
- Myanmar snub-nosed monkey**  
*Rhinopithecus strykeri*

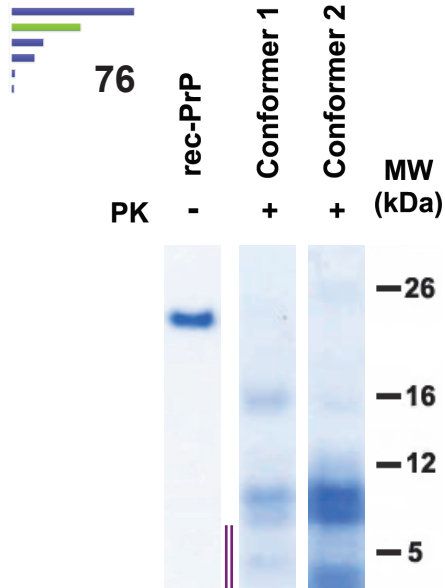

211 AA

2  
Conformers

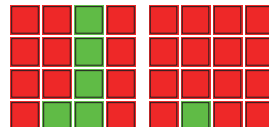

Tm<sup>Exp</sup>: ND

ΔΔG: -1.54

### In vitro studies

TgVole (1x) Not tested  
Angola colobus Not tested

### In vivo studies

TgVole (1x) Not tested  
Angola colobus Not tested

pLDDT  
[86.04]

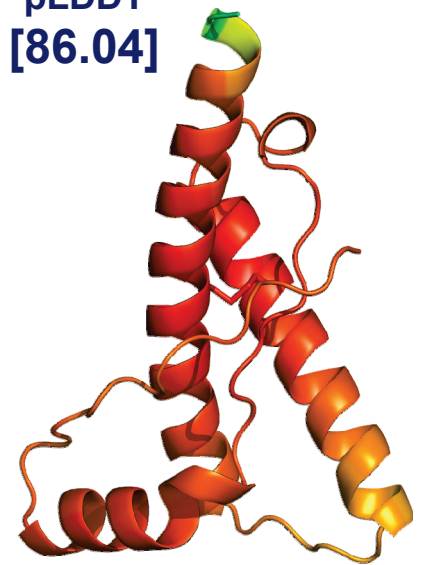



# Aye-aye

GenBank: **BK064012**

**P63%**

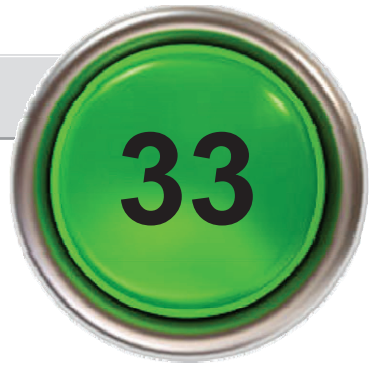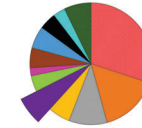

30-40

## *Daubentonia madagascariensis*

Primates 35/45  
*Daubentoniidae* 1/1

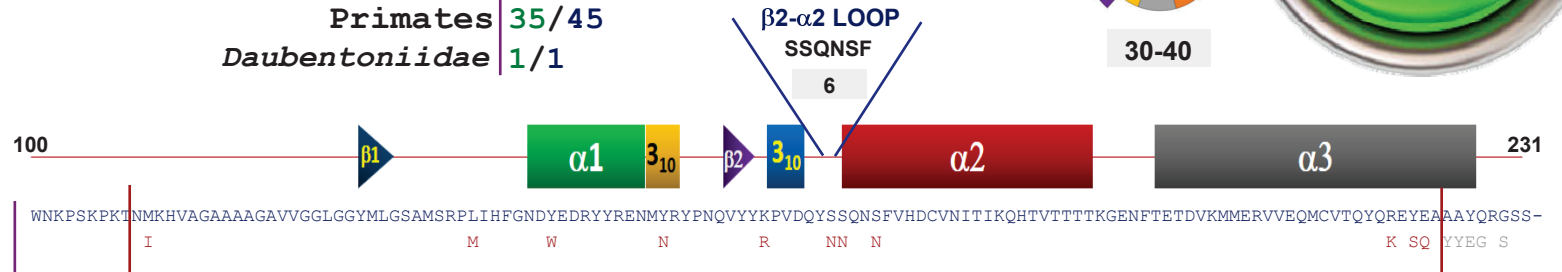

PrP sequence differs by 11 amino acids from the bank vole PrP (see in red)

No deletions  
No insertions  
No polymorphic variants found

Distinct primary sequence across species

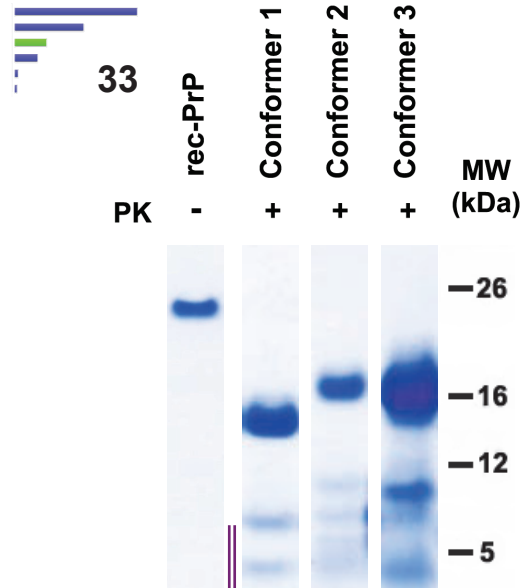

213 AA

**3**  
Conformers

$T_m^{Exp}$ : ND  
 $\Delta\Delta G$ : ND

### *In vitro* studies

TgVole (1x) Not tested  
Aye-aye Not tested

### *In vivo* studies

TgVole (1x) Not tested  
Aye-aye Not tested

pLDDT  
[86.65]

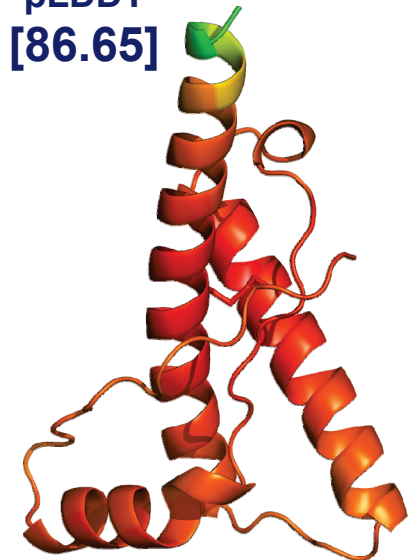

# Mohol bushbaby

GenBank: **BK064194**

**P29%**

**0**



0

## *Galago moholi*

Primates **35/45**

Galagidae **1/2**

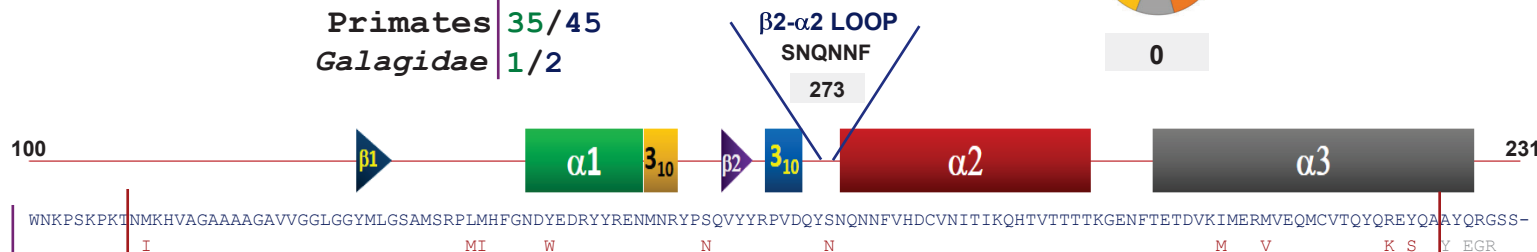

PrP sequence differs by 10 amino acids from the bank vole PrP (see in red)

- No deletions
- No insertions
- No polymorphic variants found

$T_m^{Exp}$ : ND

$\Delta\Delta G$ : **-7.11**

Distinct primary sequence across species

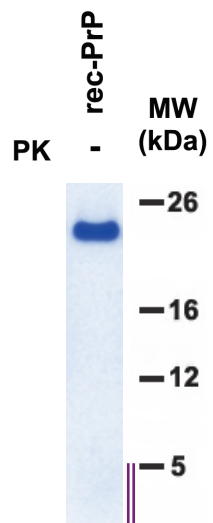

217 AA

**0**  
Conformers

**NO MISFOLDING**

*In vitro* studies

**NOT APPLICABLE**

*In vivo* studies

**NOT APPLICABLE**

pLDDT  
**[84.35]**

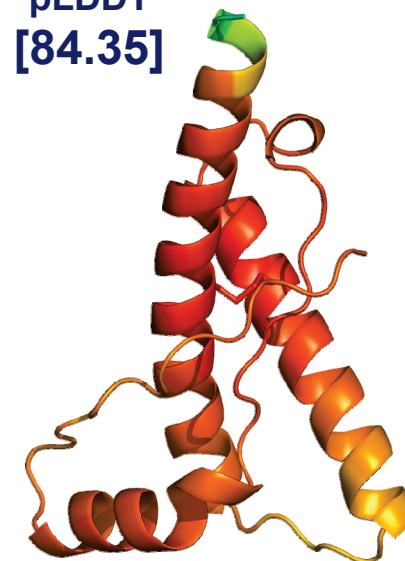

# Western gorilla

GenBank: U08300

P51%

14.3



10-20

## Gorilla gorilla

Primates 35/45  
Hominidae 4/4

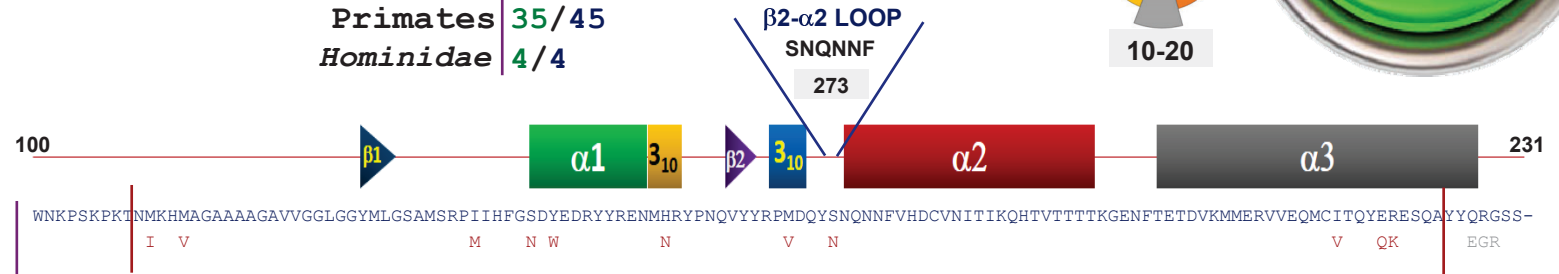

PrP sequence differs by 11 amino acids from the bank vole PrP (see in red)

No deletions  
No insertions  
No polymorphic variants found

Distinct primary sequence across species

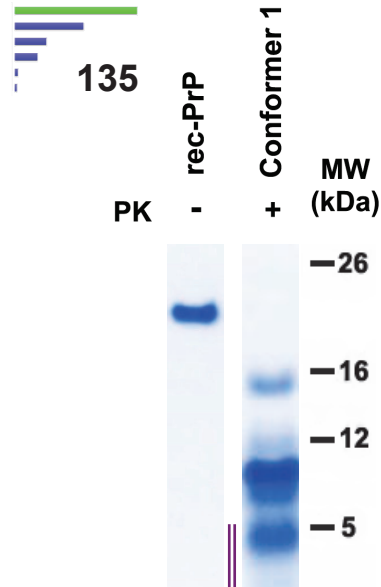

211 AA

1  
Conformers

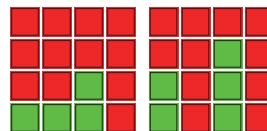

Tm<sup>Exp</sup>: ND

ΔΔG: -5.87

### In vitro studies

TgVole (1x) Not tested  
Western gorilla Not tested

### In vivo studies

TgVole (1x) Not tested  
Western gorilla Not tested

pLDDT [85.92]

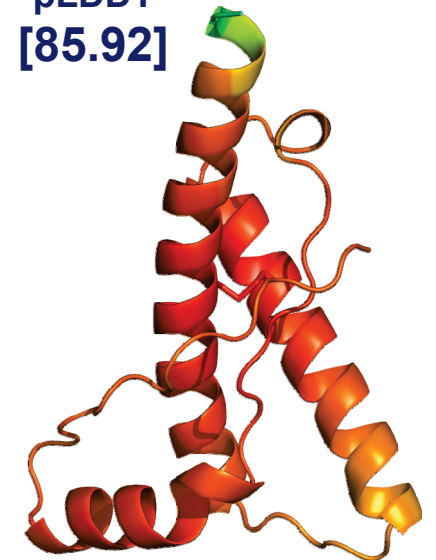

Distinct primary sequence across species

# Human

GenBank: NM\_001080123

P61%

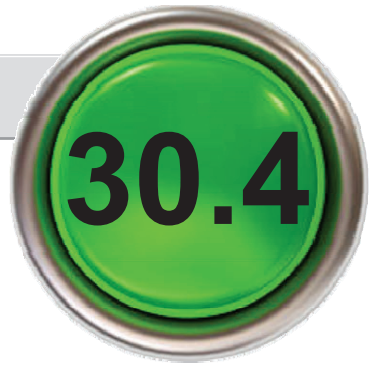

30-40

## Homo sapiens

Primates 35/45  
Hominidae 4/4

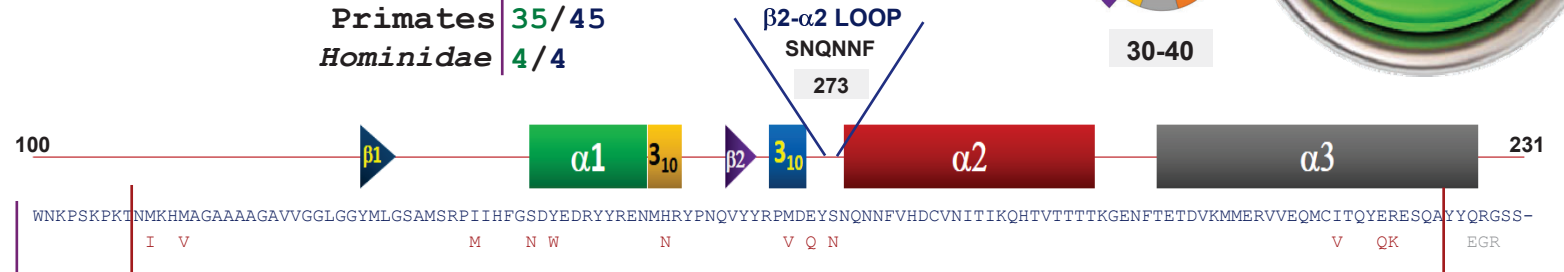

PrP sequence differs by 12 amino acids from the bank vole PrP (see in red)

No deletions  
No insertions  
It shows polymorphic variants

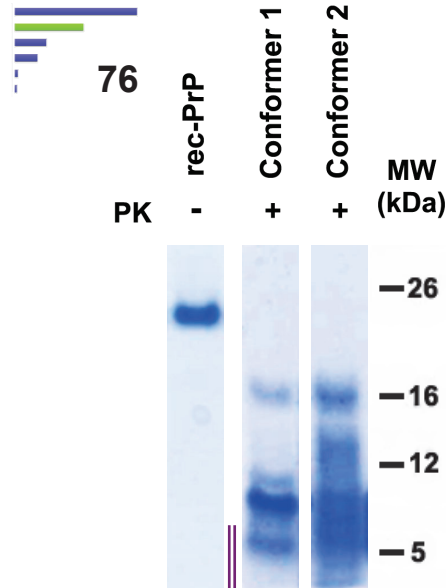

211 AA

2  
Conformers

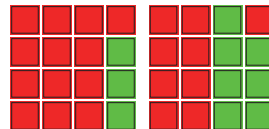

Tm<sup>Exp</sup>: ND  
ΔΔG: -11.6

### In vitro studies

TgVole (1x) Propagate  
Human Ongoing

### In vivo studies

TgVole (1x) Infectious  
TgHuman Ongoing

pLDDT [86.1]

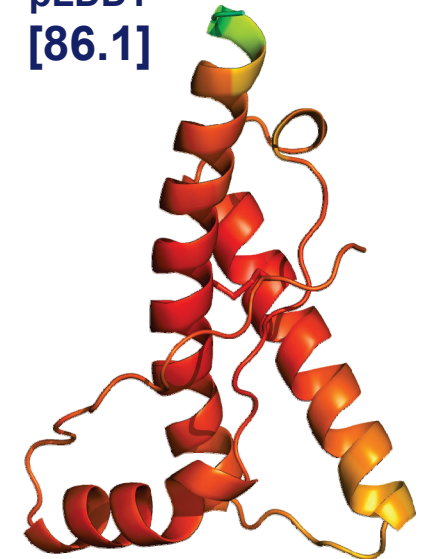

# Eastern hoolock gibbon

GenBank: **BK064201**

P50%

**13.9**



10-20

## *Hoolock leuconedys*

Primates 35/45  
Hylobatidae 1/1

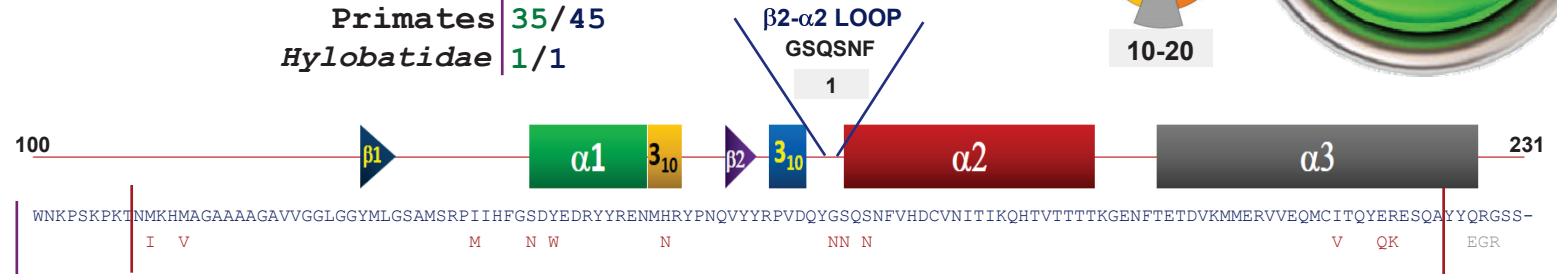

PrP sequence differs by 12 amino acids from the bank vole PrP (see in red)

No deletions  
No insertions  
No polymorphic variants found

Distinct primary sequence across species

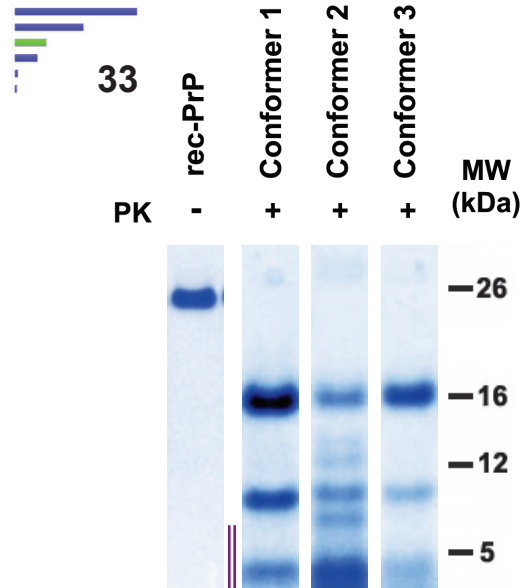

211 AA

**3**  
Conformers

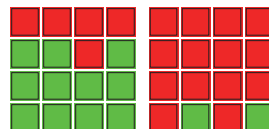

Tm<sup>Exp</sup>: ND

ΔΔG: **-11.24**

### *In vitro* studies

TgVole (1x) Not tested  
Eastern hoolock gibbon Not tested

### *In vivo* studies

TgVole (1x) Not tested  
Eastern hoolock gibbon Not tested

pLDDT  
[85.7]

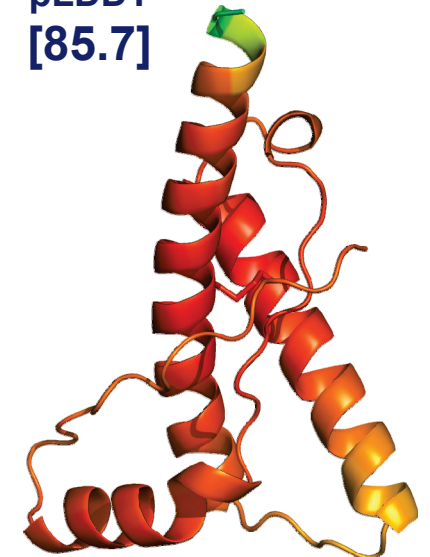

Distinct primary sequence across species

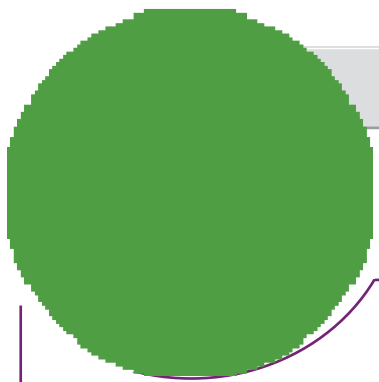

# Indri

GenBank: **BK064058**

P70%

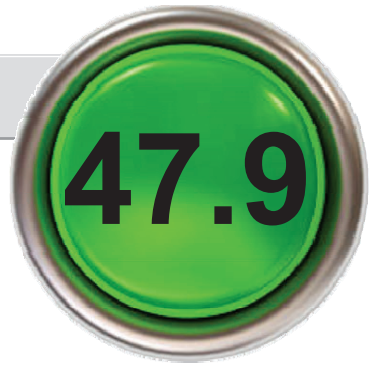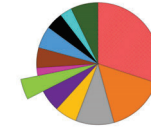

40-50

## Indri indri

Primates 35/45  
Indridae 2/2

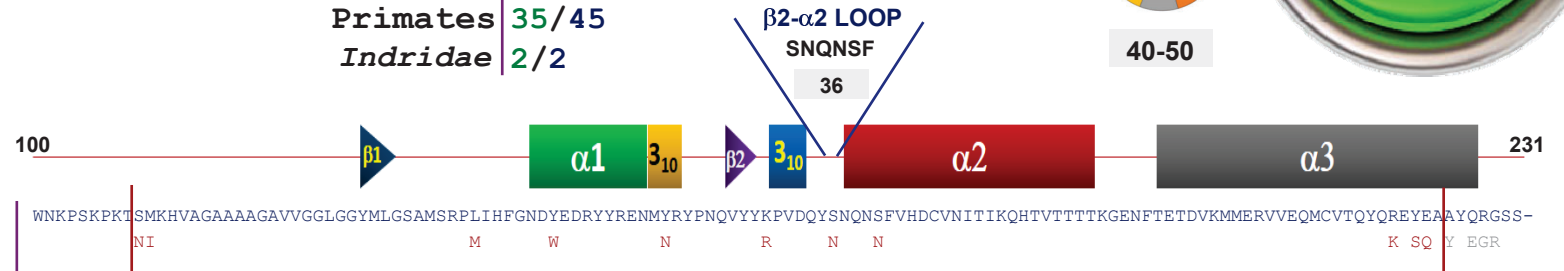

PrP sequence differs by 11 amino acids from the bank vole PrP (see in red)

- No deletions
- No insertions
- No polymorphic variants found

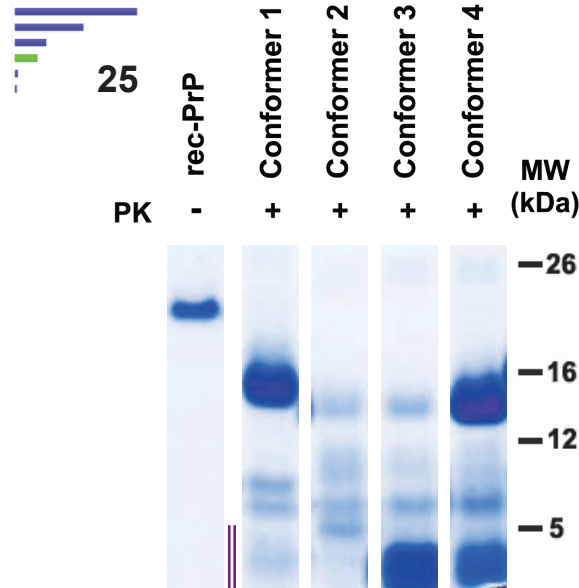

212 AA

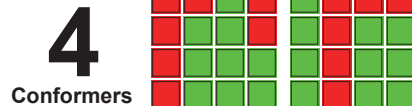

Tm<sup>Exp</sup>: ND

ΔΔG: -10.04

### In vitro studies

|             |            |
|-------------|------------|
| TgVole (1x) | Not tested |
| Indri       | Not tested |

### In vivo studies

|             |            |
|-------------|------------|
| TgVole (1x) | Not tested |
| Indri       | Not tested |

pLDDT [87.65]

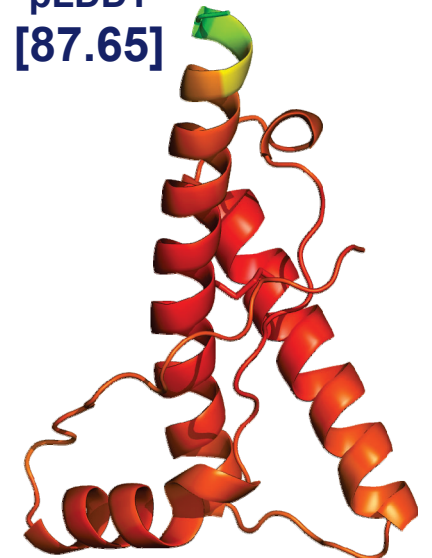

# Brown woolly monkey

GenBank: AY765384

P61%

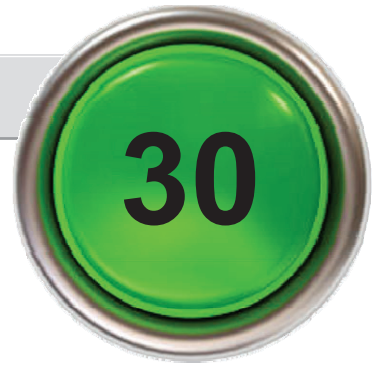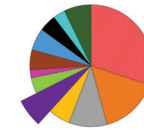

## Lagothrix lagotricha

Primates 35/45  
Atelidae 3/5

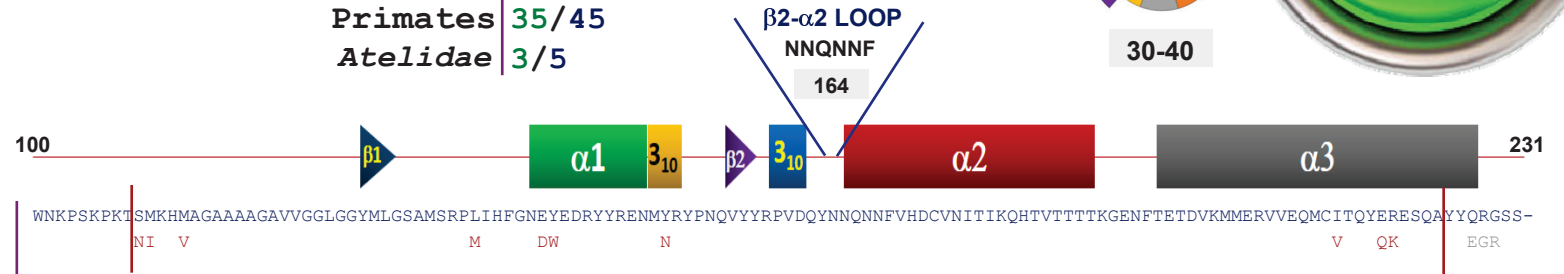

PrP sequence differs by 10 amino acids from the bank vole PrP (see in red)

- No deletions
- No insertions
- No polymorphic variants found

Distinct primary sequence across species

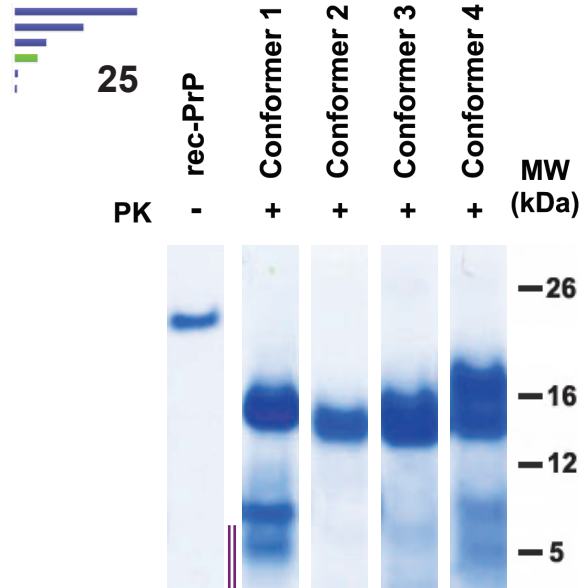

210 AA

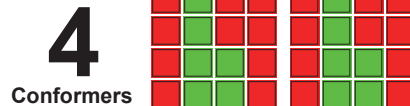

Tm<sup>Exp</sup>: ND

ΔΔG: -7.89

### In vitro studies

TgVole (1x) Not tested

Brown woolly monkey Not tested

### In vivo studies

TgVole (1x) Not tested

Brown woolly monkey Not tested

pLDDT [86.89]

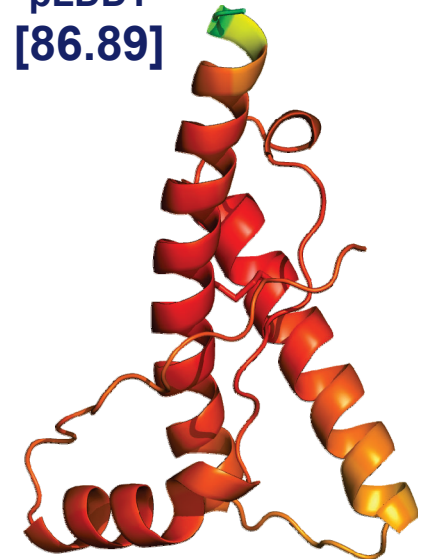

# Golden lion tamarin

GenBank: **BK063917**

P34%



0-10

## *Leontopithecus rosalia*

Primates 35/45  
Cebidae 7/8

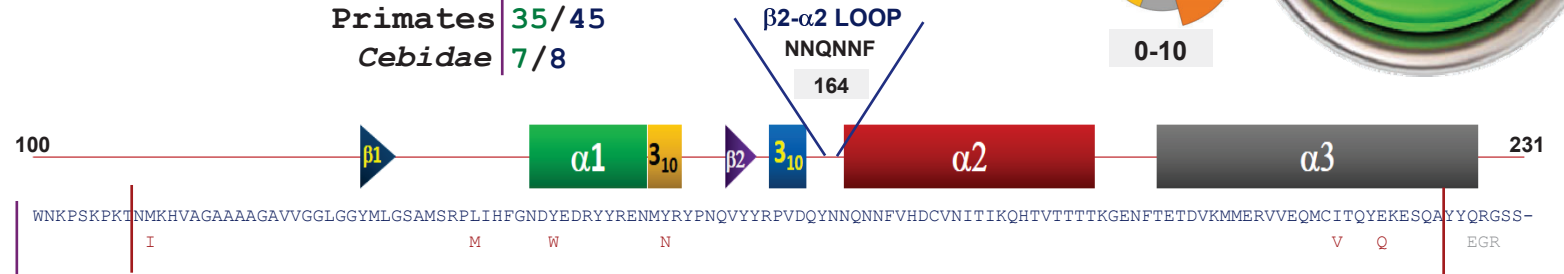

PrP sequence differs by 6 amino acids from the bank vole PrP (see in red)

No deletions  
No insertions  
No polymorphic variants found

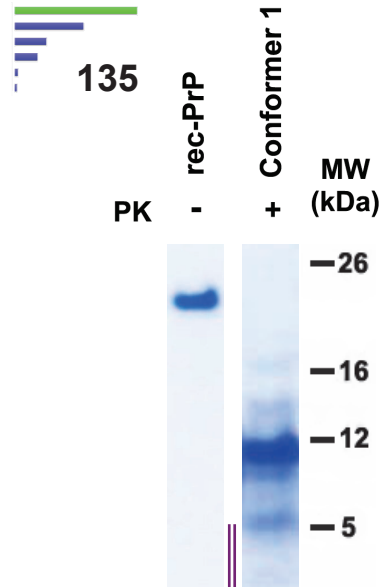

210 AA

1  
Conformers

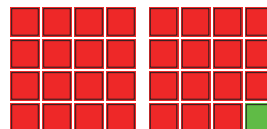

Tm<sup>Exp</sup>: ND

$\Delta\Delta G$ : -4.23

### *In vitro* studies

TgVole (1x) Not tested

Golden lion tamarin Not tested

### *In vivo* studies

TgVole (1x) Not tested

Golden lion tamarin Not tested

pLDDT  
[87.28]

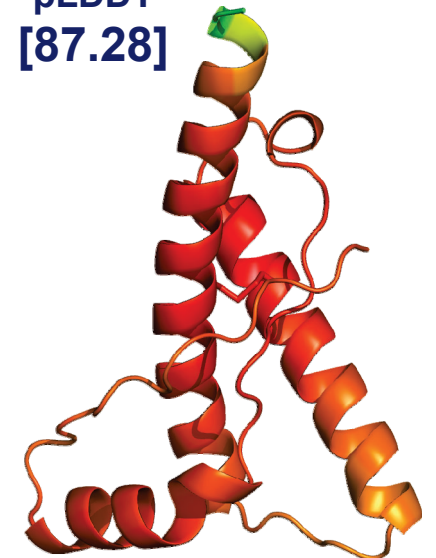

1 species sharing the same primary sequence

Golden-headed lion tamarin  
*Leontopithecus chrysomelas*



# Red slender loris

GenBank: **BK064198**

P39%

4.8



0-10

## *Loris tardigradus*

Primates 35/45  
Lorisidae 2/3

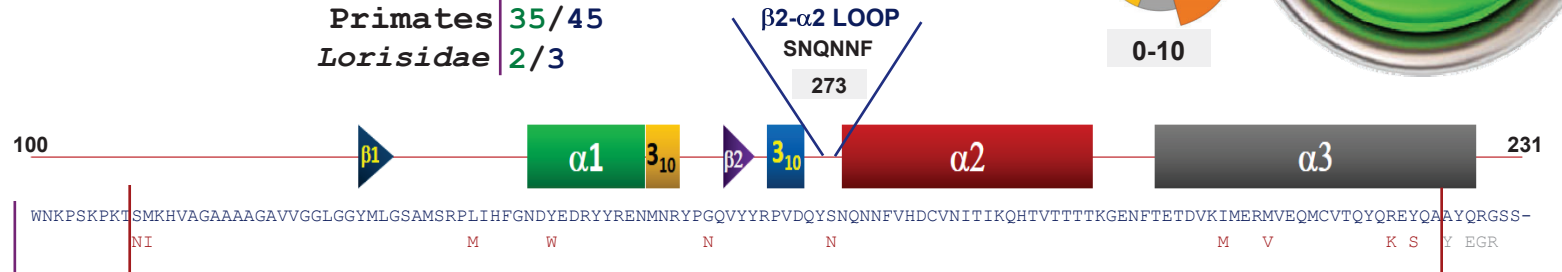

PrP sequence differs by 10 amino acids from the bank vole PrP (see in red)

No deletions  
No insertions  
No polymorphic variants found

Distinct primary sequence across species

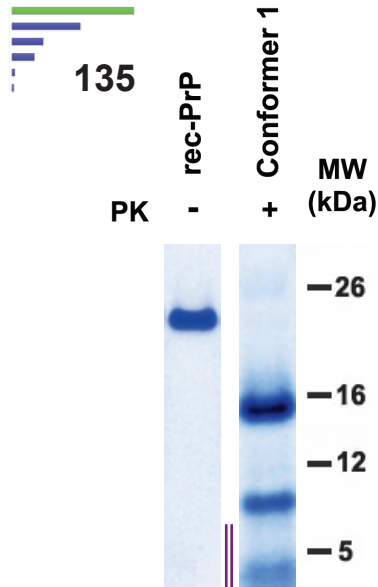

211 AA

1  
Conformers

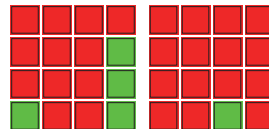

Tm<sup>Exp</sup>: ND

ΔΔG: 10.2

### *In vitro* studies

TgVole (1x) Not tested  
Red slender loris Not tested

### *In vivo* studies

TgVole (1x) Not tested  
Red slender loris Not tested

pLDDT  
[88.22]

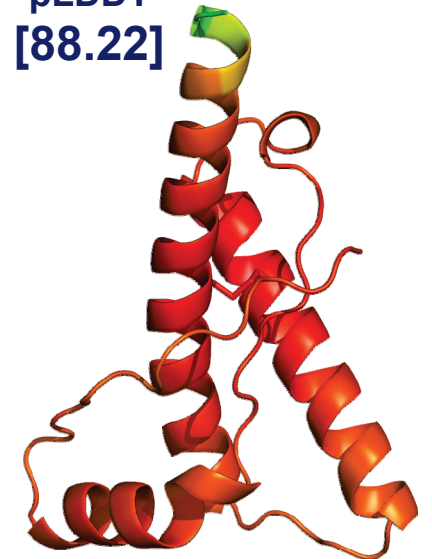

# Pigtail macaque

GenBank: XM\_011741222

P59%

26.8

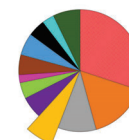

20-30

## Macaca nemestrina

Primates 35/45

Cercopithecoidea 7/7

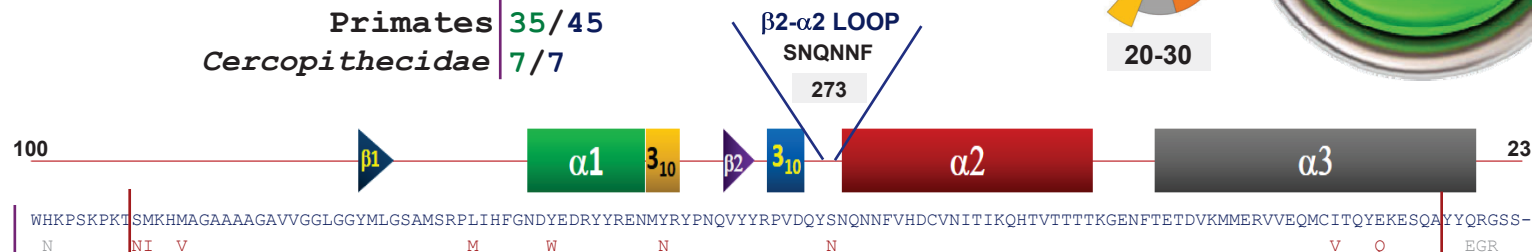

PrP sequence differs by 9 amino acids from the bank vole PrP (see in red)

No deletions  
No insertions  
No polymorphic variants found

20 species sharing the same primary sequence

- Hamadryas baboon (*Papio hamadryas*)
- Olive baboon (*Papio anubis*)
- Assam macaque (*Macaca assamensis*)
- Barbary macaque (*Macaca sylvanus*)
- Stump-tailed macaque (*Macaca arctoides*)
- Rhesus macaque (*Macaca mulatta*)
- Japanese macaque (*Macaca fuscata*)
- Grivet (*Chlorocebus aethiops*)
- Black crested mangabey (*Lophocebus aterrimus*)
- DeBrazza's monkey (*Cercopithecus neglectus*)
- Guenons (*Cercopithecus diana*)
- Mona monkey (*Cercopithecus mona*)
- Green monkey (*Chlorocebus sabaeus*)
- Pigtail macaque (*Macaca nemestrina*)
- Allen's swamp monkey (*Allenopithecus nigroviridis*)
- Patas monkey (*Erythrocebus patas*)
- Guinea baboon (*Papio papio*)
- Sykes' monkey (*Cercopithecus albogularis*)
- Lion-tailed macaque (*Macaca silenus*)
- Formosan rock macaque (*Macaca cyclopis*)

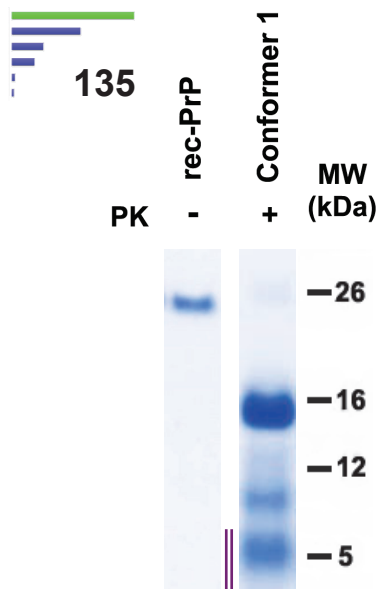

219 AA

1  
Conformers

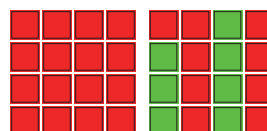

Tm<sup>Exp</sup>: ND

ΔΔG: -6.33

*In vitro* studies

No propagation  
TgVole (1x)

Not tested  
Pigtail macaque

*In vivo* studies

Ongoing  
TgVole (1x)

Not tested  
Pigtail macaque

pLDDT  
[85.9]

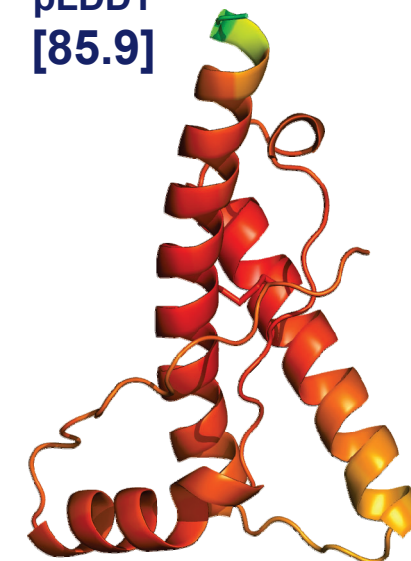

Distinct primary sequence across species

# Drill

GenBank: XM\_011975232

P64%

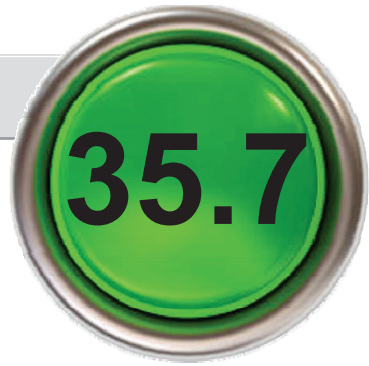

30-40

## Mandrillus leucophaeus

Primates 35/45

Cercopithecidae 7/7

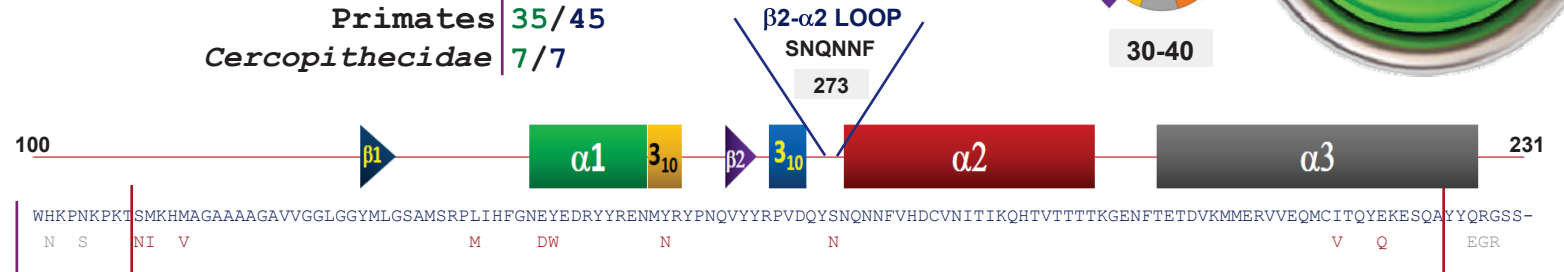

PrP sequence differs by 10 amino acids from the bank vole PrP (see in red)

- No deletions
- No insertions
- No polymorphic variants found

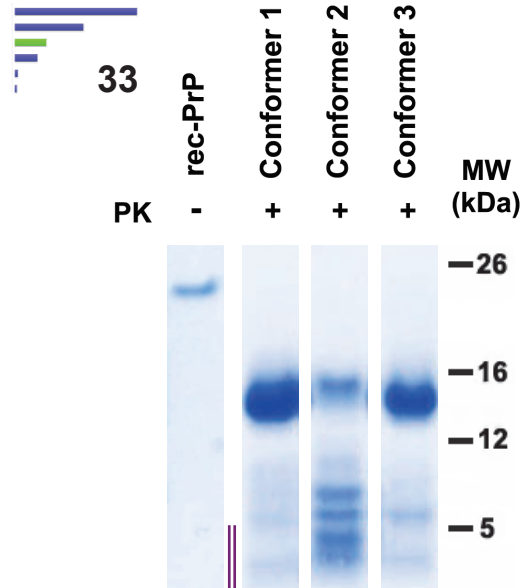

219 AA

**3**  
Conformers

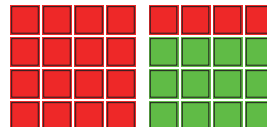

Tm<sup>Exp</sup>: ND

ΔΔG: -10.7

### In vitro studies

|             |            |
|-------------|------------|
| TgVole (1x) | Not tested |
| Drill       | Not tested |

### In vivo studies

|             |            |
|-------------|------------|
| TgVole (1x) | Not tested |
| Drill       | Not tested |

pLDDT [86.25]

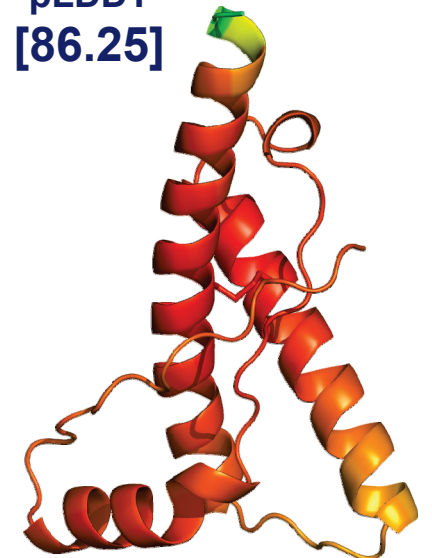

Distinct primary sequence across species

# Mandrill

GenBank: U08303

*Mandrillus sphinx*

Primates 35/45

Cercopithecidae 7/7

P34%



0-10

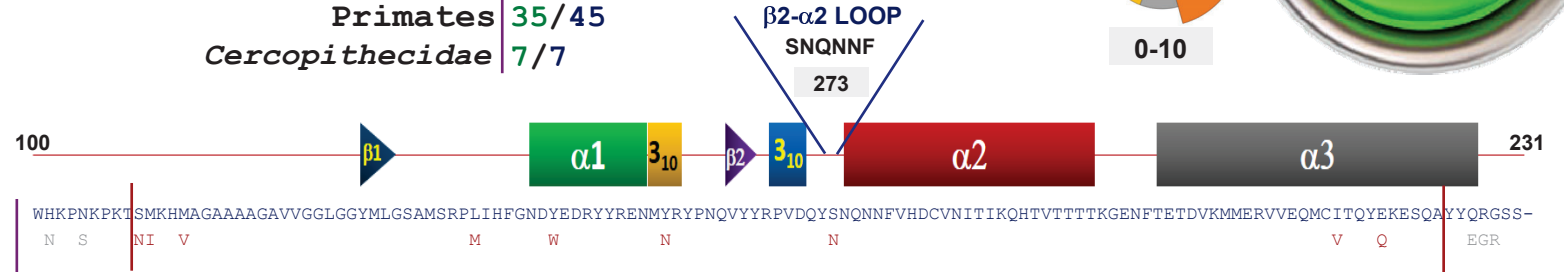

PrP sequence differs by 9 amino acids from the bank vole PrP (see in red)

- No deletions
- No insertions
- No polymorphic variants found

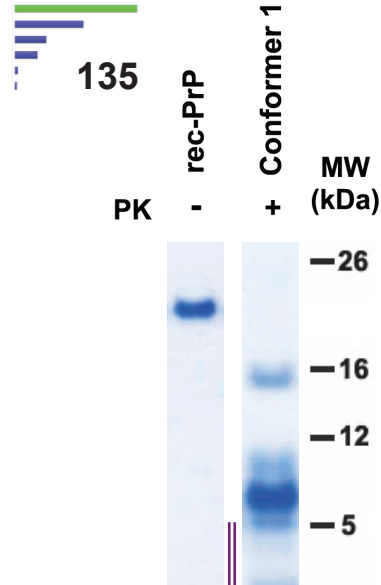

211 AA

1  
Conformers



Tm<sup>Exp</sup>: ND

ΔΔG: -6.05

*In vitro* studies

- TgVole (1x) Not tested
- Mandrill Not tested

*In vivo* studies

- TgVole (1x) Not tested
- Mandrill Not tested

pLDDT [85.56]

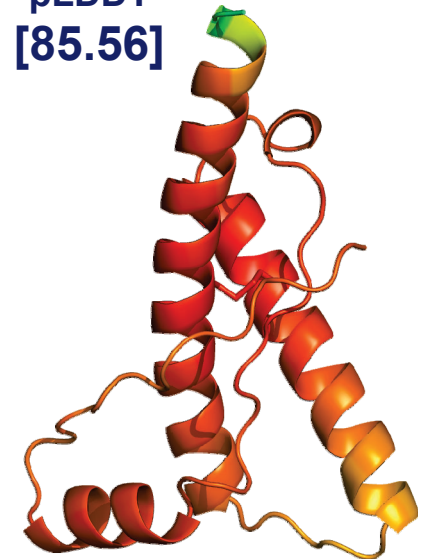

# Gray mouse lemur

GenBank: NM\_001309920

P29%



0

## *Microcebus murinus*

Primates 35/45

Cheirogaleidae 1/4

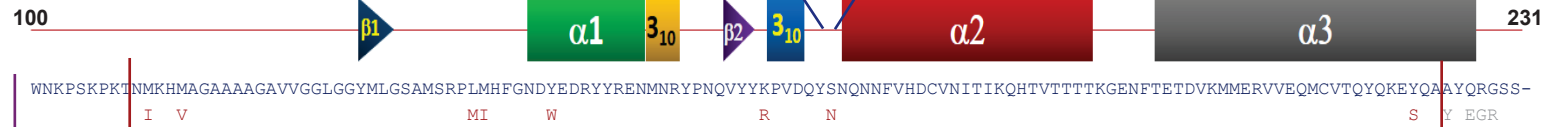

PrP sequence differs by 8 amino acids from the bank vole PrP (see in red)

No deletions  
No insertions  
No polymorphic variants found

$T_m^{Exp}$ : ND

$\Delta\Delta G$ : 1.62

3 species sharing the same primary sequence

- Reddish-gray mouse lemur *Microcebus griseorufus*
- Mittermeier's mouse lemur *Microcebus mittermeieri*
- Northern rufous mouse lemur *Microcebus tavaratra*

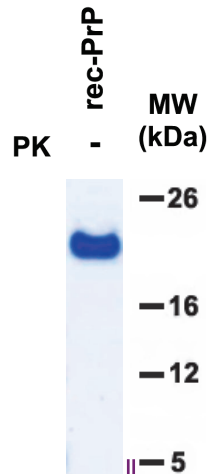

212 AA

0 Conformers

**NO MISFOLDING**



*In vitro* studies

**NOT APPLICABLE**

*In vivo* studies

**NOT APPLICABLE**

pLDDT [85.44]

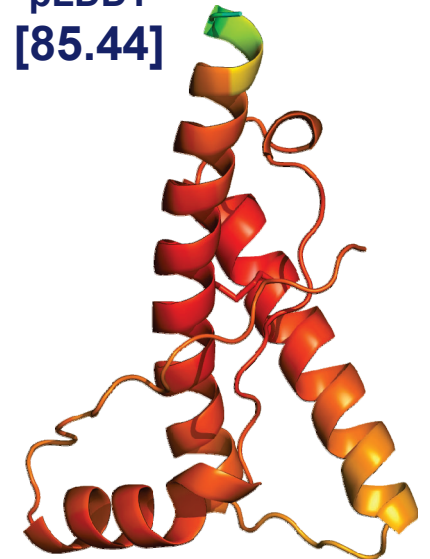

# Golden-brown mouse lemur

GenBank: **BK064086**

## *Microcebus ravelobensis*

Primates 35/45

Cheirogaleidae 1/4

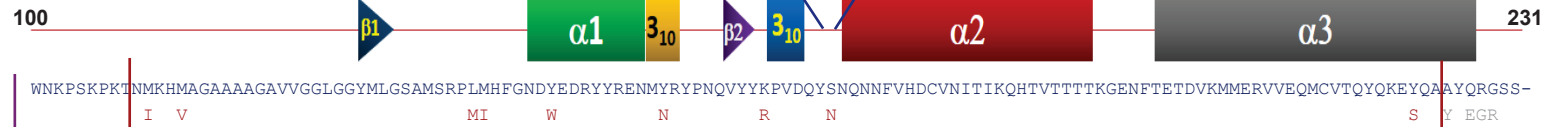

PrP sequence differs by 9 amino acids from the bank vole PrP (see in red)

No deletions  
No insertions  
No polymorphic variants found

$T_m^{Exp}$ : ND

$\Delta\Delta G$ : -0.56

Distinct primary sequence across species

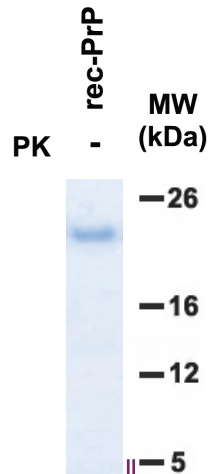

212 AA

0  
Conformers

**NO  
MISFOLDING**

*In vitro* studies

**NOT  
APPLICABLE**

*In vivo* studies

**NOT  
APPLICABLE**

pLDDT  
[85.56]

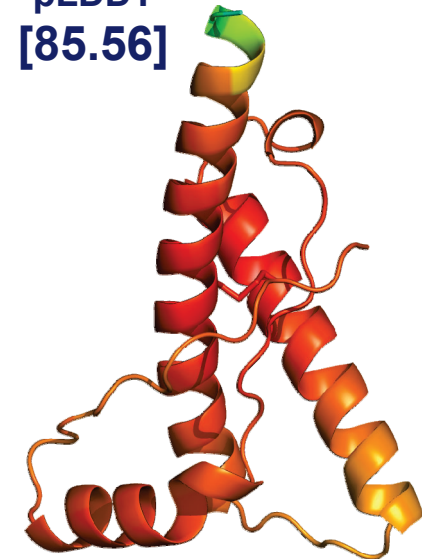

P29%



0



# Angolan talapoin

GenBank: **BK064818**

P41%

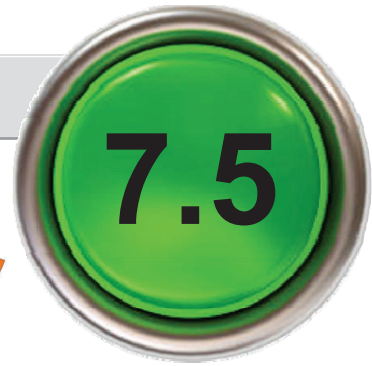

0-10

## Miopithecus talapoin

Primates 35/45

Cercopithecidae 7/7

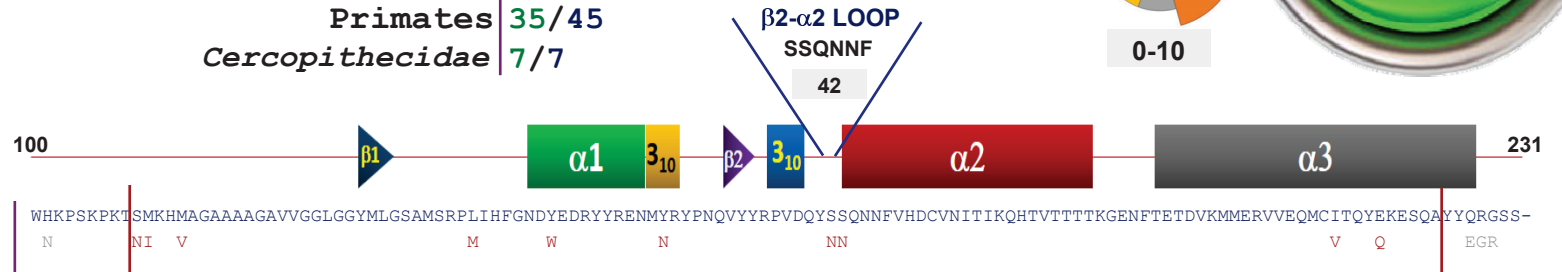

PrP sequence differs by 10 amino acids from the bank vole PrP (see in red)

- No deletions
- No insertions
- No polymorphic variants found

Distinct primary sequence across species

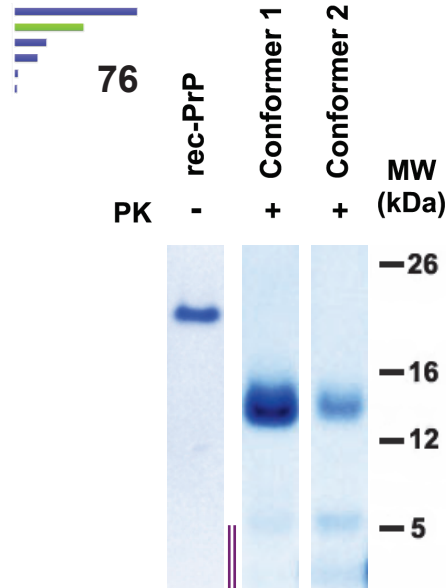

211 AA

**2**  
Conformers

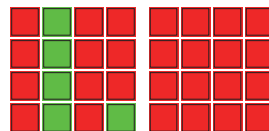

Tm<sup>Exp</sup>: ND

ΔΔG: -10.99

### In vitro studies

TgVole (1x) Not tested

Angolan talapoin Not tested

### In vivo studies

TgVole (1x) Not tested

Angolan talapoin Not tested

pLDDT  
[85.96]

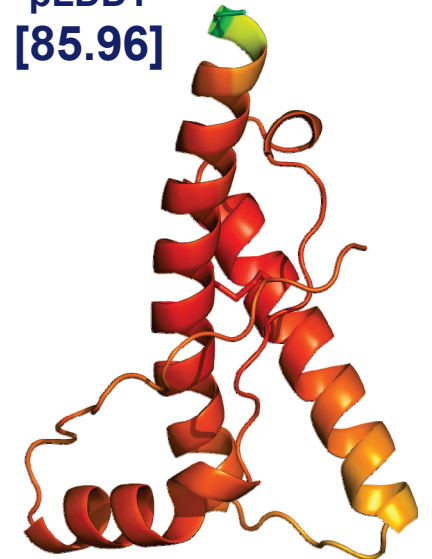

1 species sharing the same primary sequence

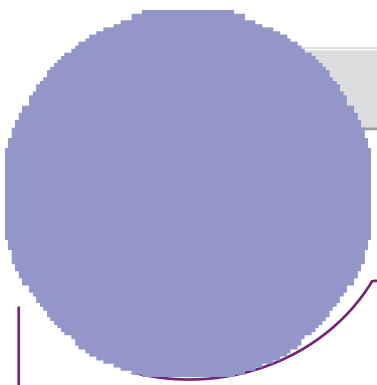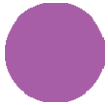

Northern giant mouse lemur  
*Mirza zaza*

# Coquerel's giant mouse lemur

GenBank: **BK064094**

P60%

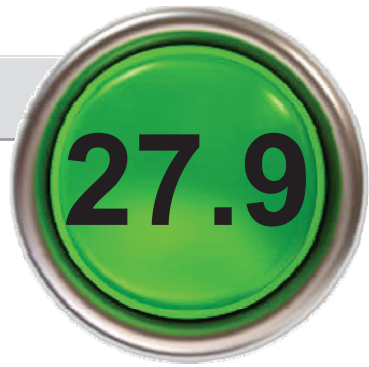

20-30

## *Mirza coquereli*

Primates 35/45  
Cheirogaleidae 1/4

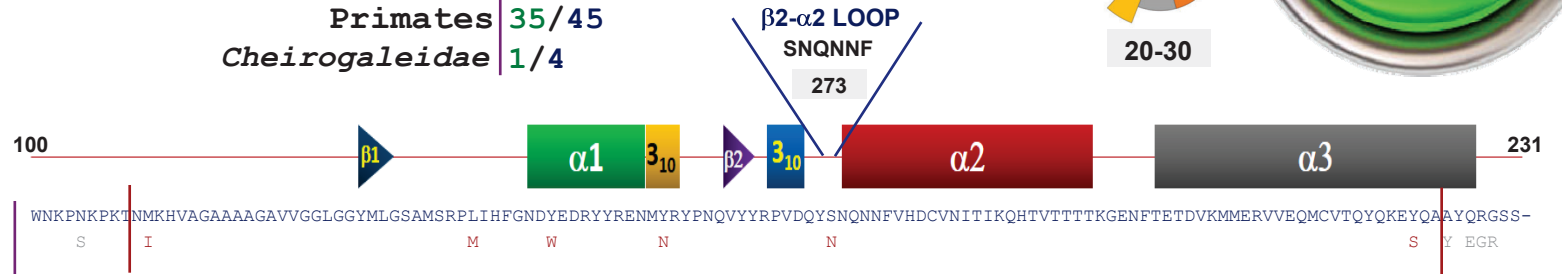

PrP sequence differs by 6 amino acids from the bank vole PrP (see in red)

No deletions  
No insertions  
No polymorphic variants found

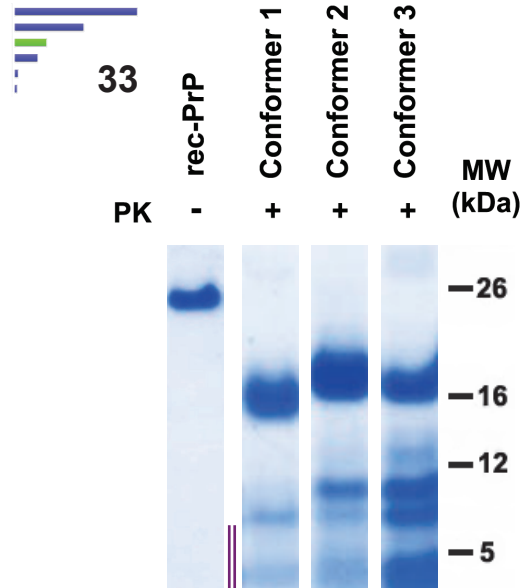

212 AA

3  
Conformers

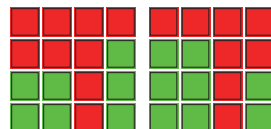

Tm<sup>Exp</sup>: ND

ΔΔG: 4.23

### *In vitro* studies

TgVole (1x) Not tested

Coquerel's giant mouse lemur Not tested

### *In vivo* studies

TgVole (1x) Not tested

Coquerel's giant mouse lemur Not tested

pLDDT  
[85.02]

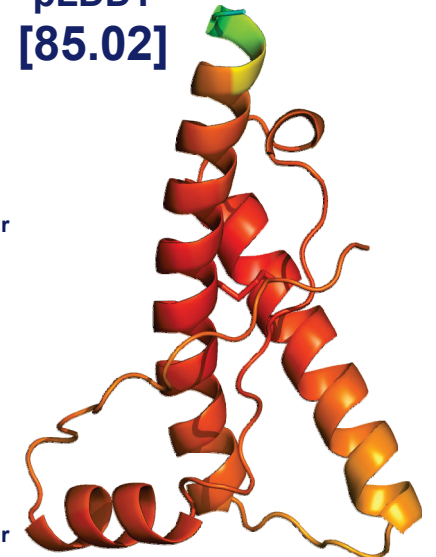



# Sunda slow loris

GenBank: **BK064114**

P46%

10.7



## Nycticebus coucang

Primates 35/45  
Lorisidae 2/3

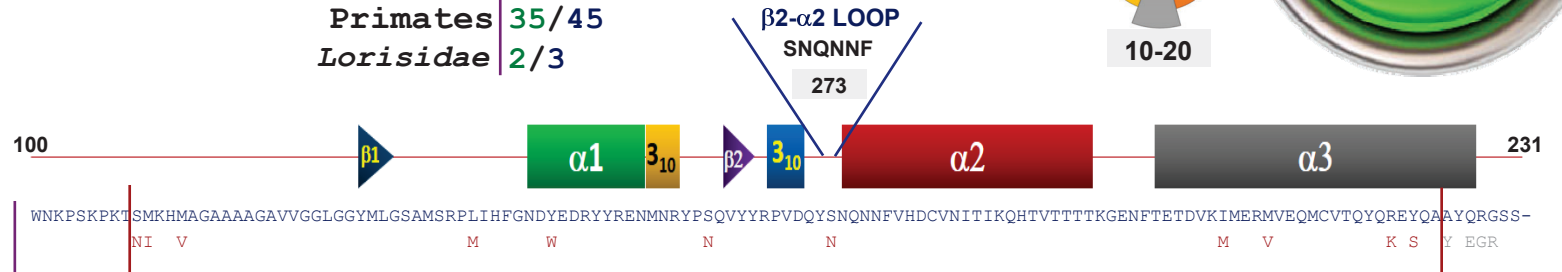

PrP sequence differs by 11 amino acids from the bank vole PrP (see in red)

- No deletions
- No insertions
- No polymorphic variants found

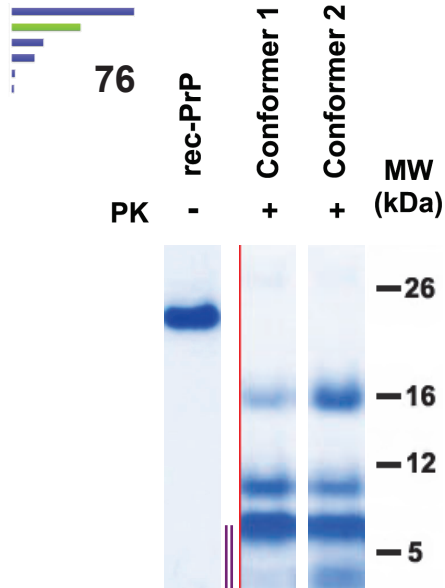

211 AA

2 Conformers

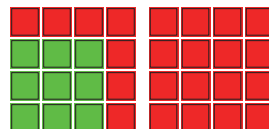

Tm<sup>Exp</sup>: ND  
ΔΔG: -1.87

### In vitro studies

- TgVole (1x) Not tested
- Sunda slow loris Not tested

### In vivo studies

- TgVole (1x) Not tested
- Sunda slow loris Not tested

pLDDT [87.46]

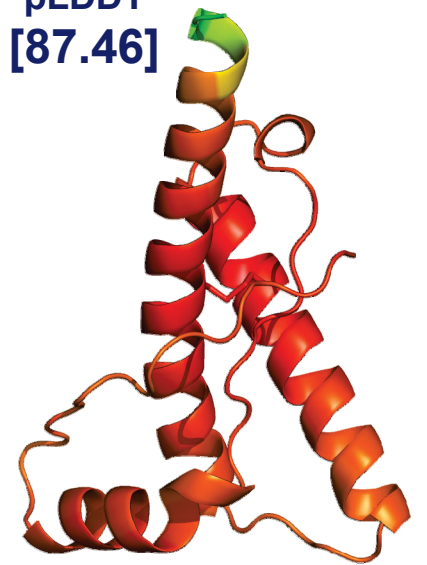

1 species sharing the same primary sequence

Bengal slow loris  
*Nycticebus bengalensis*

# Pygmy slow loris

GenBank: **OR47281**

P29%



0

## *Nycticebus pygmaeus*

Primates 35/45  
Lorisidae 2/3

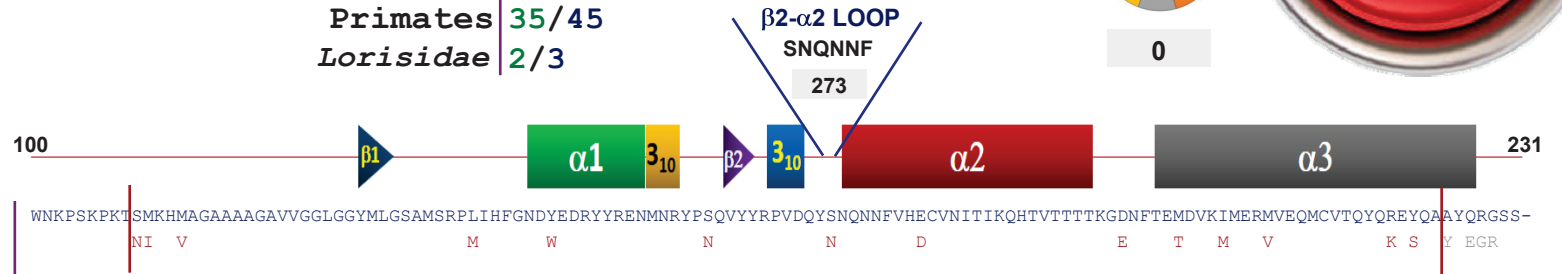

PrP sequence differs by 14 amino acids from the bank vole PrP (see in red)

No deletions  
No insertions  
No polymorphic variants found

Tm<sup>Exp</sup>: ND

ΔΔG: -6.58

Distinct primary sequence across species

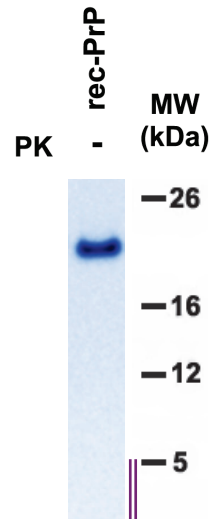

211 AA

0  
Conformers

**NO  
MISFOLDING**

*In vitro* studies

**NOT  
APPLICABLE**

*In vivo* studies

**NOT  
APPLICABLE**

pLDDT  
[90.2]

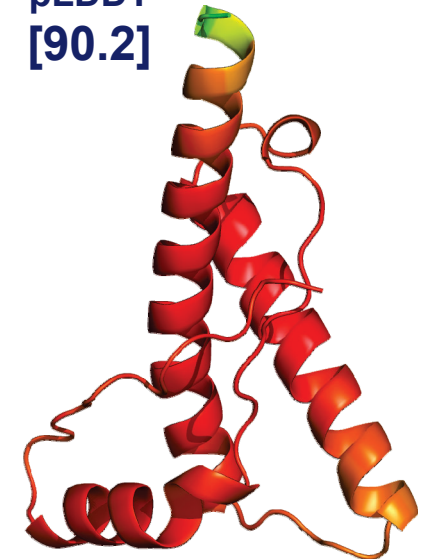

# Northern greater galago

GenBank: XM\_003788036

P35%

1.8



0-10

## Otolemur garnettii

Primates 35/45  
Galagidae 1/2

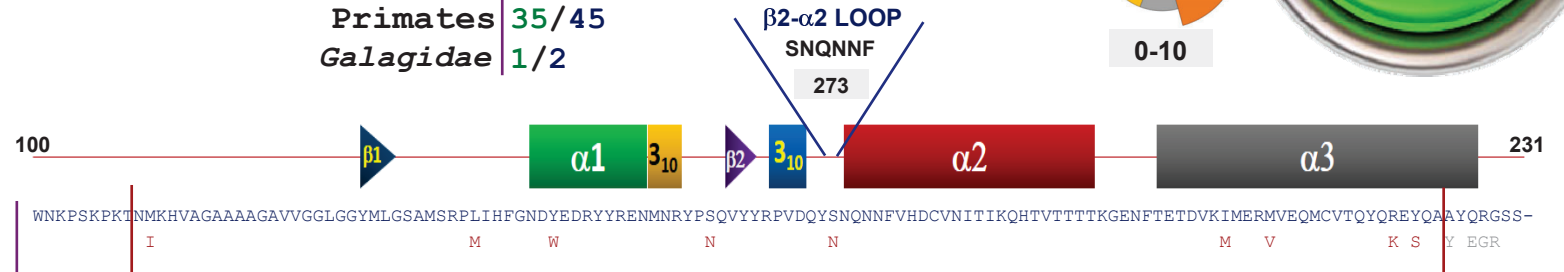

PrP sequence differs by 9 amino acids from the bank vole PrP (see in red)

- No deletions
- No insertions
- No polymorphic variants found

Distinct primary sequence across species

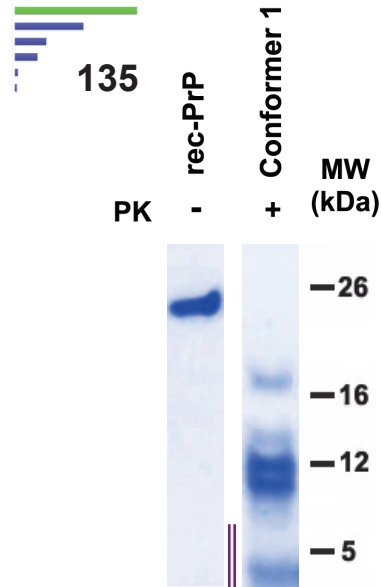

217 AA

1  
Conformers

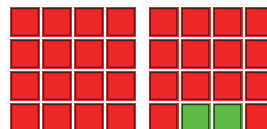

Tm<sup>Exp</sup>: ND

ΔΔG: -2.15

### In vitro studies

TgVole (1x) Not tested

Northern greater galago Not tested

### In vivo studies

TgVole (1x) Not tested

Northern greater galago Not tested

pLDDT [84.32]

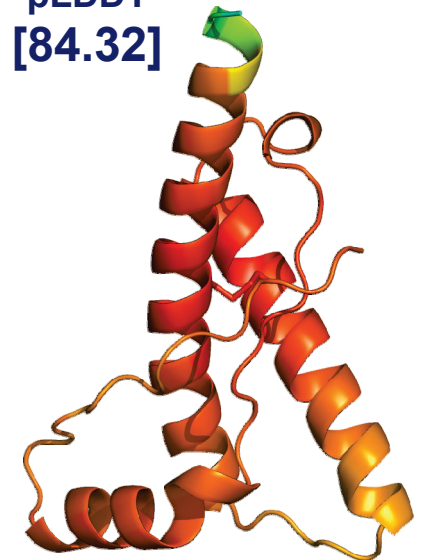

# Chimpanzee

GenBank: U08296

P55%

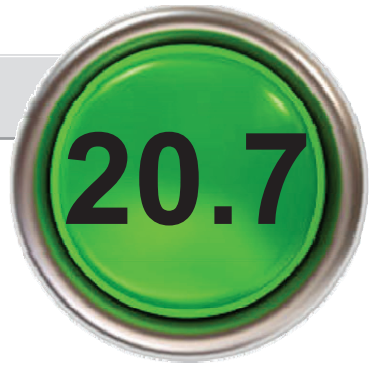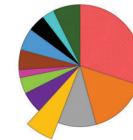

20-30

## *Pan troglodytes*

Primates 35/45  
Hominidae 4/4

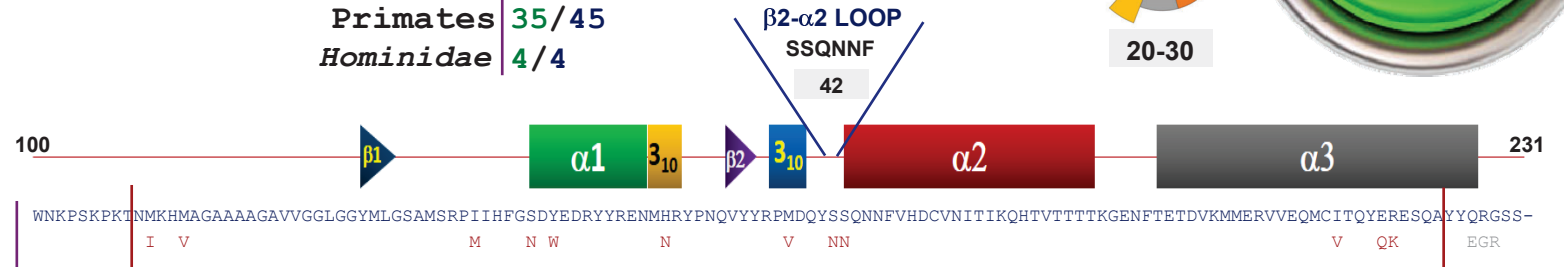

PrP sequence differs by 12 amino acids from the bank vole PrP (see in red)

No deletions  
No insertions  
No polymorphic variants found

9 species sharing the same primary sequence

- Agile gibbon *Hylobates agilis*
- Lar gibbon *Hylobates lar*
- Silvery gibbon *Hylobates moloch*
- Müller's gibbon *Hylobates muelleri*
- Pileated gibbon *Hylobates pileatus*
- N white-cheeked gibbon *Nomascus leucogenys*
- S white-cheeked gibbon *Nomascus siki*
- Bonobo *Pan paniscus*
- Siamang *Symphalangus syndactylus*

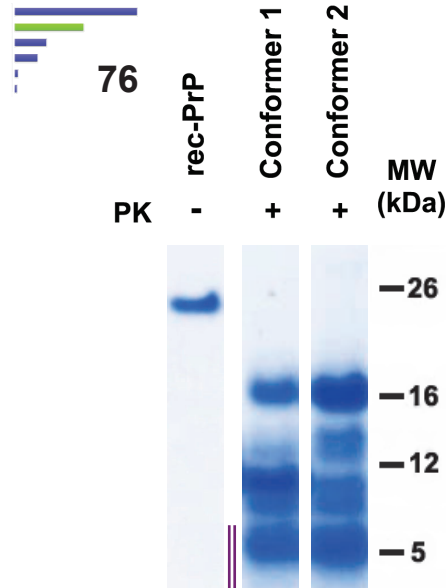

211 AA

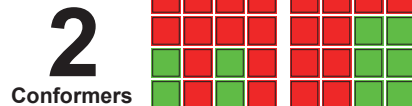

2 Conformers

Tm<sup>Exp</sup>: ND  
ΔΔG: -9.88

### In vitro studies

TgVole (1x) Not tested

Chimpanzee Not tested

### In vivo studies

TgVole (1x) Not tested

Chimpanzee Not tested

pLDDT [85.22]

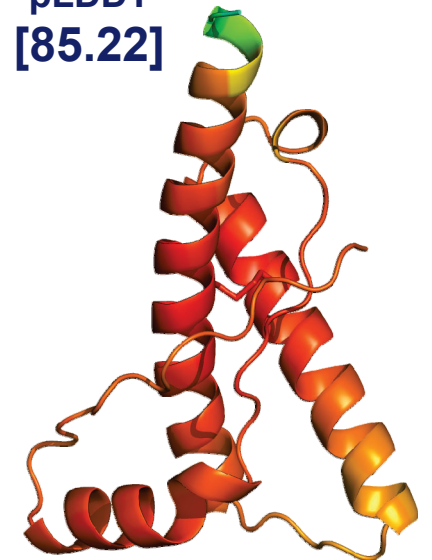

# Rio Tapajós saki

GenBank: AY765379

P29%



0

## *Pithecia irrorata*

Primates 35/45  
*Pitheciidae* 3/4

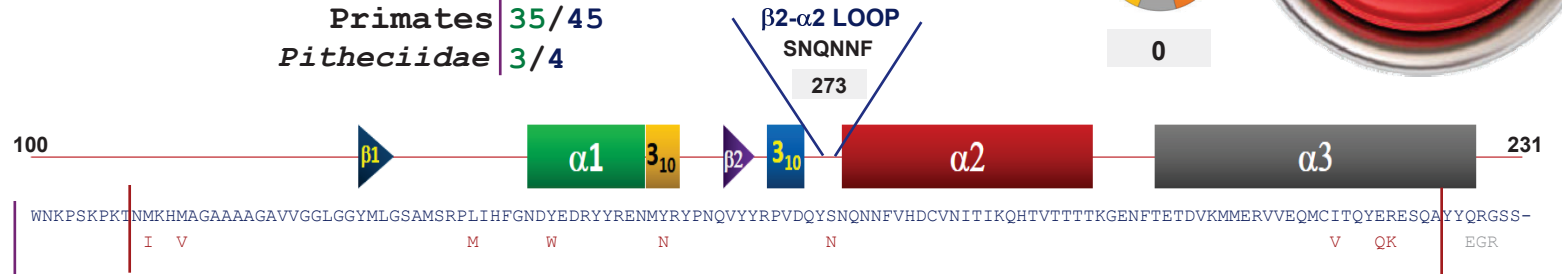

PrP sequence differs by 9 amino acids from the bank vole PrP (see in red)

No deletions  
No insertions  
No polymorphic variants found

Tm<sup>Exp</sup>: ND

ΔΔG: -6.48

1 species sharing the same primary sequence

White-faced saki  
*Pithecia pithecia*

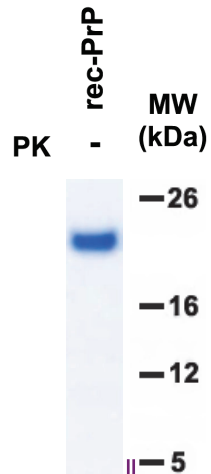

211 AA

0  
Conformers

NO  
MISFOLDING

*In vitro* studies

NOT  
APPLICABLE

*In vivo* studies

NOT  
APPLICABLE

pLDDT  
[85.46]

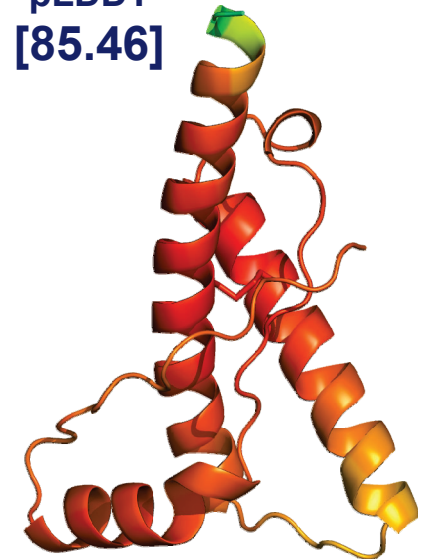

# Bornean orangutan

GenBank: U08305

*Pongo pygmaeus*

Primates 35/45  
Hominidae 4/4

P47%

11.6



1 species sharing the same primary sequence

Sumatran orangutan  
*Pongo abelii*

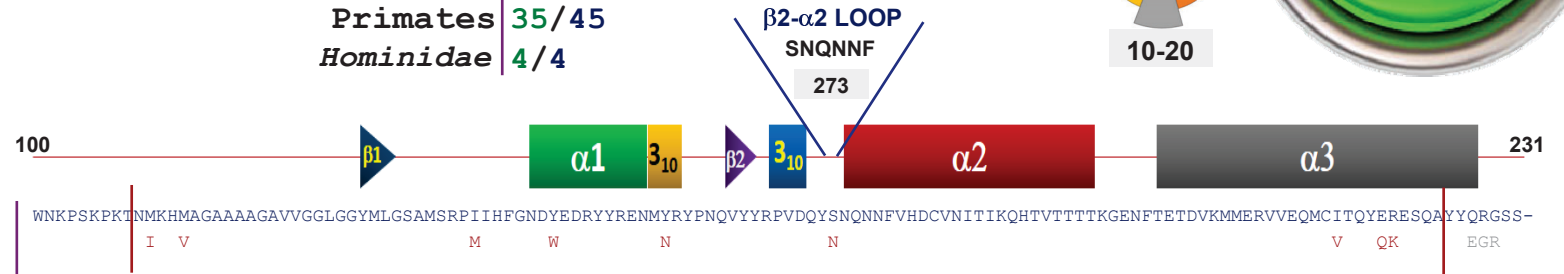

PrP sequence differs by 9 amino acids from the bank vole PrP (see in red)

No deletions  
No insertions  
No polymorphic variants found

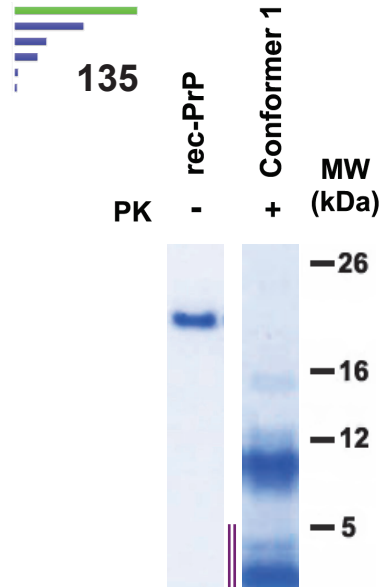

211 AA

1  
Conformers

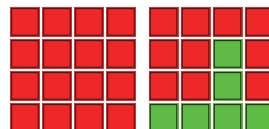

Tm<sup>Exp</sup>: ND

ΔΔG: -10.55

*In vitro* studies

TgVole (1x) Not tested  
Bornean orangutan Not tested

*In vivo* studies

TgVole (1x) Not tested  
Bornean orangutan Not tested

pLDDT [86.48]

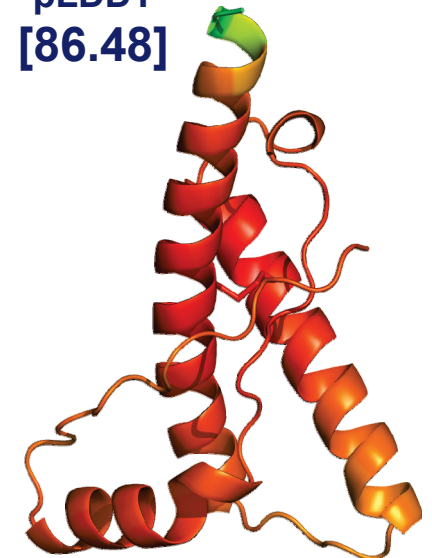

# Greater bamboo lemur

GenBank: **BK063921**

P34%

0.9



0-10

## *Prolemur simus*

Primates 35/45  
Lemuridae 1/1

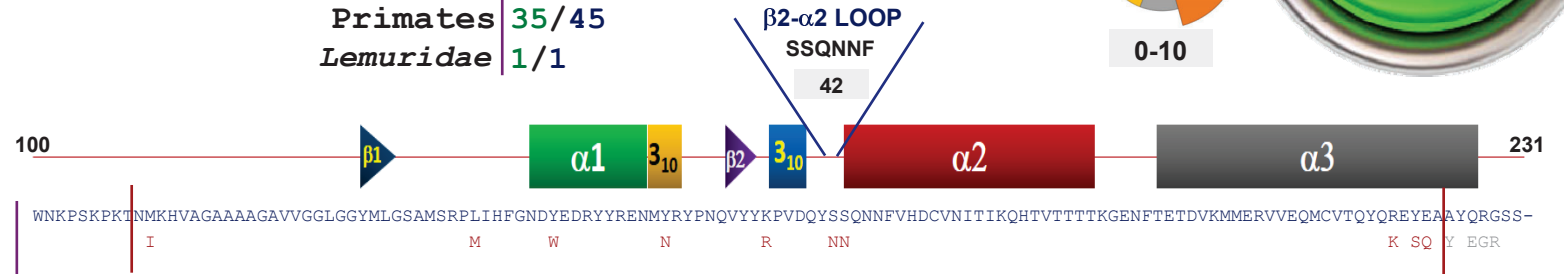

PrP sequence differs by 10 amino acids from the bank vole PrP (see in red)

No deletions  
No insertions  
No polymorphic variants found

Tm<sup>Exp</sup>: ND

ΔΔG: -6.96

5 species sharing the same primary sequence

- White-headed lemur *Eulemur albifrons*
- Common brown lemur *Eulemur fulvus*
- Black lemur *Eulemur macaco*
- Mongoose lemur *Eulemur mongoz*
- Ring-tailed lemur *Lemur catta*

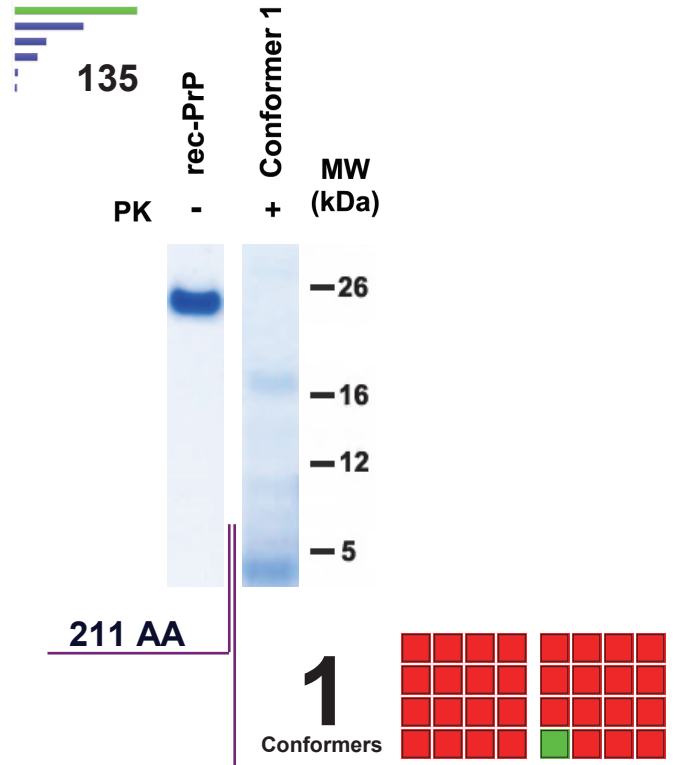

### *In vitro* studies

TgVole (1x) Not tested

Greater bamboo lemur Not tested

### *In vivo* studies

TgVole (1x) Not tested

Greater bamboo lemur Not tested

pLDDT [85.48]

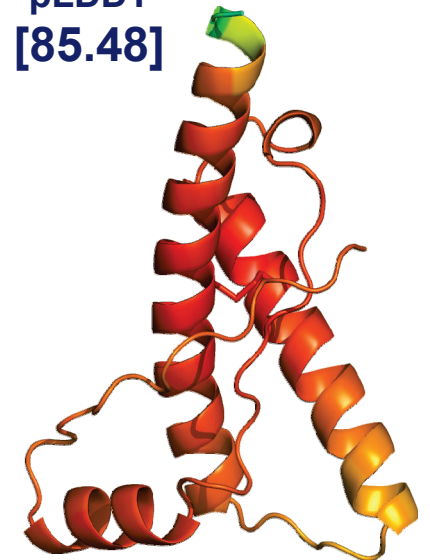

# Coquerel's sifaka

GenBank: XM\_012639270

P64%

33.9



30-40

## *Propithecus coquereli*

Primates 35/45  
Indridae 2/2

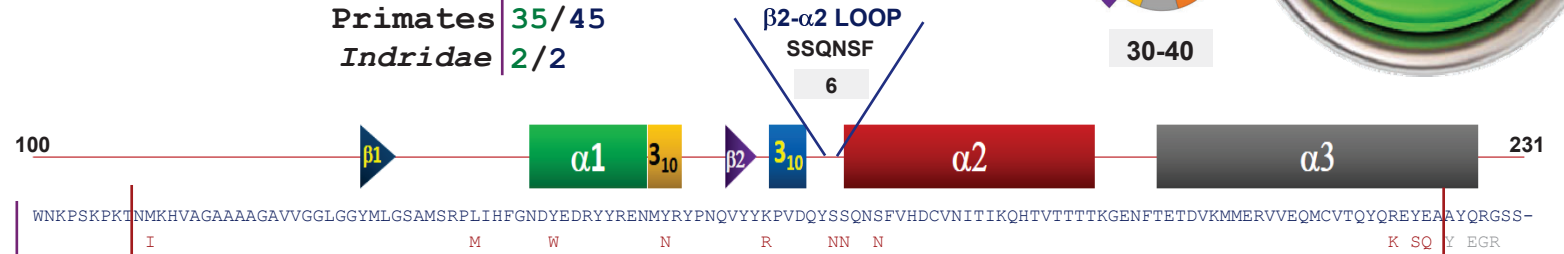

PrP sequence differs by 11 amino acids from the bank vole PrP (see in red)

No deletions  
No insertions  
No polymorphic variants found

Distinct primary sequence across species

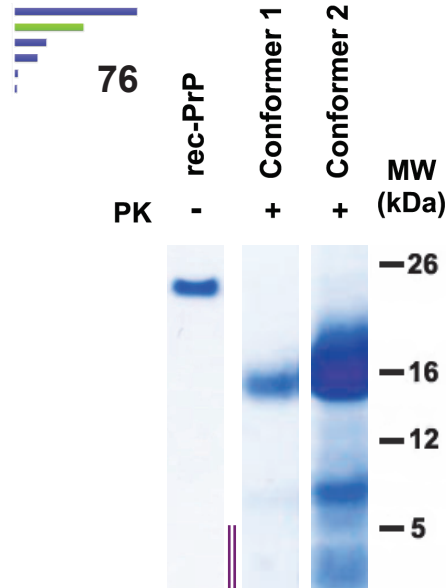

212 AA

2  
Conformers

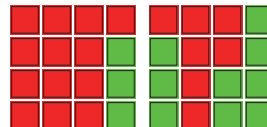

Tm<sup>Exp</sup>: ND

ΔΔG: -3.69

### *In vitro* studies

TgVole (1x) Not tested

Coquerel's sifaka Not tested

### *In vivo* studies

TgVole (1x) Not tested

Coquerel's sifaka Not tested

pLDDT [84.91]

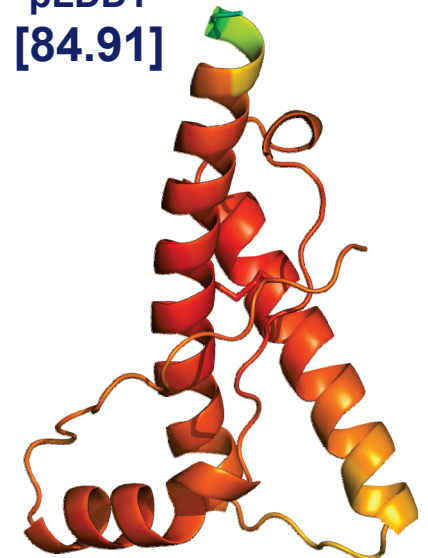



Distinct primary sequence across species

# Pied tamarin

GenBank: AY765388

P54%

18.8



## *Saguinus bicolor*

Primates 35/45  
Cebidae 7/8

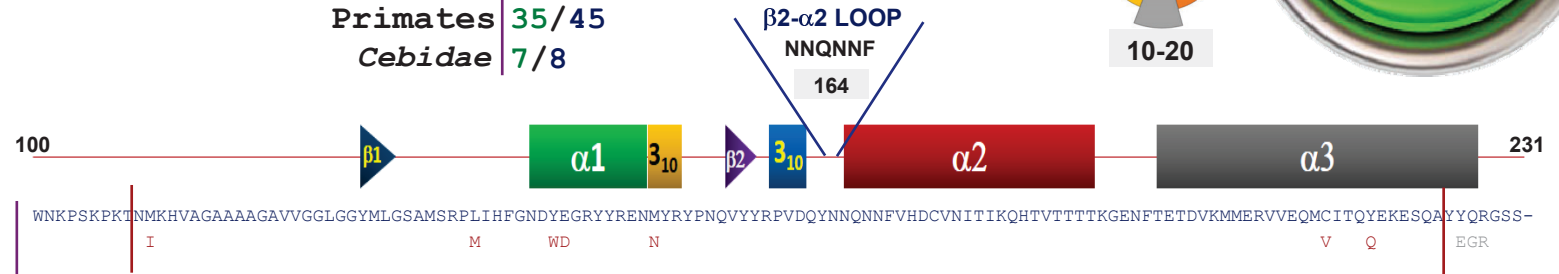

PrP sequence differs by 7 amino acids from the bank vole PrP (see in red)

No deletions  
No insertions  
No polymorphic variants found

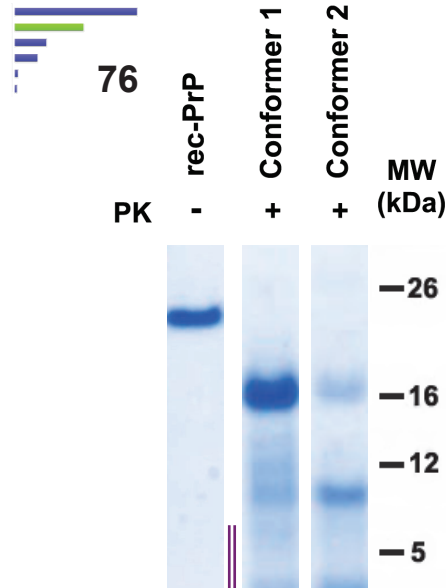

210 AA

2  
Conformers

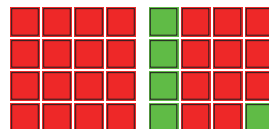

$T_m^{Exp}$ : ND  
 $\Delta\Delta G$ : 6.16

### *In vitro* studies

TgVole (1x) Not tested  
Pied tamarin Not tested

### *In vivo* studies

TgVole (1x) Not tested  
Pied tamarin Not tested

pLDDT [84.8]

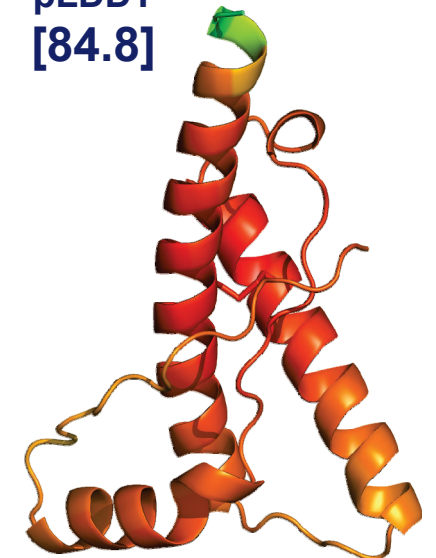

# Emperor tamarin

GenBank: **BK064034**

P73%

**53.6**

## *Saguinus imperator*

Primates 35/45  
Cebidae 7/8

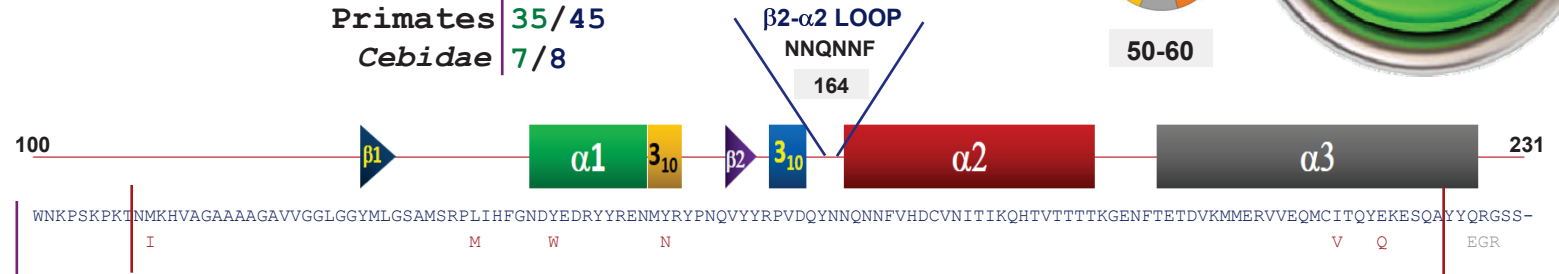

PrP sequence differs by 6 amino acids from the bank vole PrP (see in red)

No deletions  
No insertions  
No polymorphic variants found

Distinct primary sequence across species

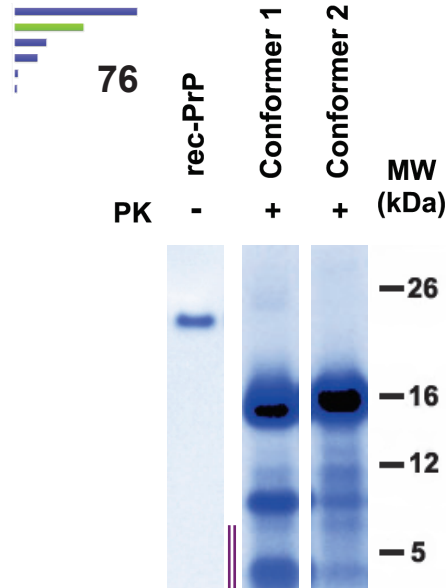

210 AA

**2**  
Conformers

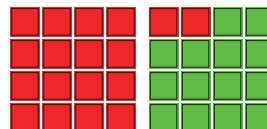

Tm<sup>Exp</sup>: ND

ΔΔG: **4.37**

### *In vitro* studies

TgVole (1x) Not tested

Emperor tamarin Not tested

### *In vivo* studies

TgVole (1x) Not tested

Emperor tamarin Not tested

pLDDT  
[86.12]

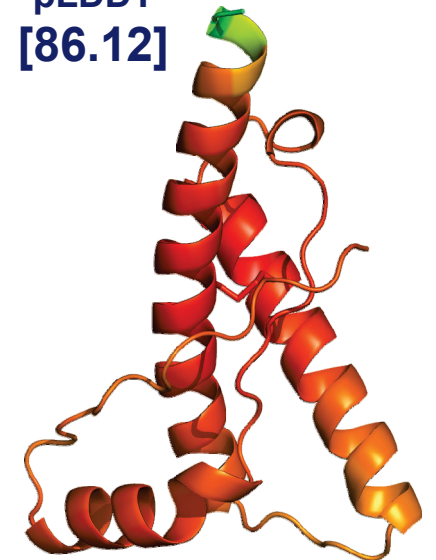

# Golden-handed tamarin

GenBank: **BK064187**

P41%

7.1



0-10

## *Saguinus midas*

Primates 35/45  
Cebidae 7/8

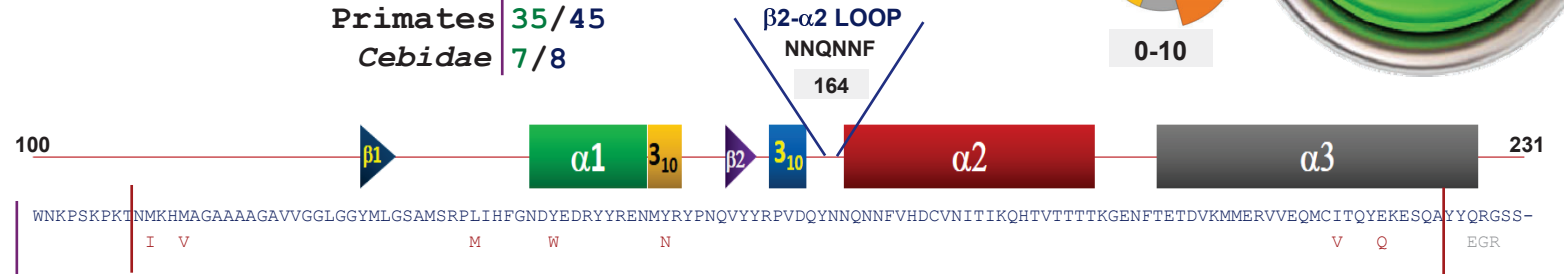

PrP sequence differs by 7 amino acids from the bank vole PrP (see in red)

No deletions  
No insertions  
No polymorphic variants found

Distinct primary sequence across species

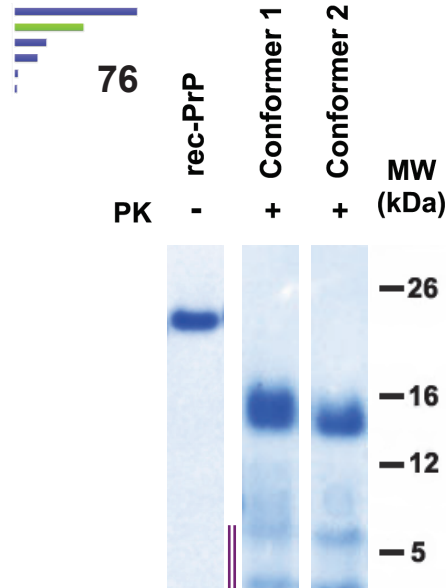

210 AA

2  
Conformers

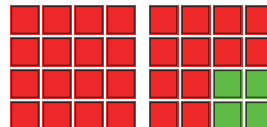

Tm<sup>Exp</sup>: ND

ΔΔG: -4.49

### *In vitro* studies

TgVole (1x) Not tested

Golden-handed tamarin Not tested

### *In vivo* studies

TgVole (1x) Not tested

Golden-handed tamarin Not tested

pLDDT  
[86.75]

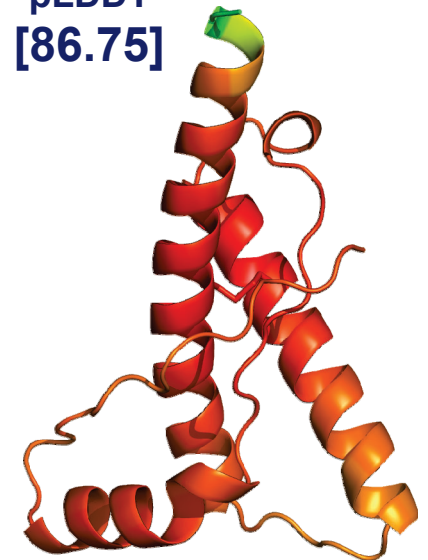

# Black-capped squirrel monkey

GenBank: **BK064035**

P34%



0-10

## *Saimiri boliviensis*

Primates 35/45  
Cebidae 7/8

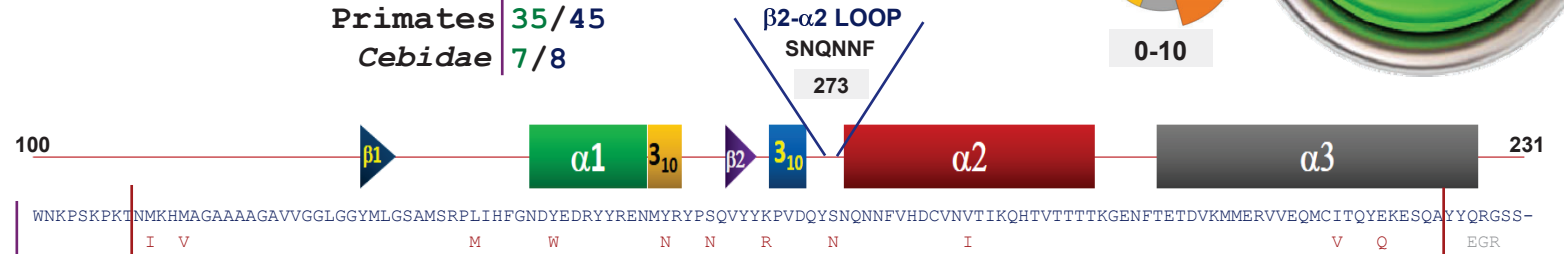

PrP sequence differs by 11 amino acids from the bank vole PrP (see in red)

- No deletions
- No insertions
- No polymorphic variants found

Distinct primary sequence across species

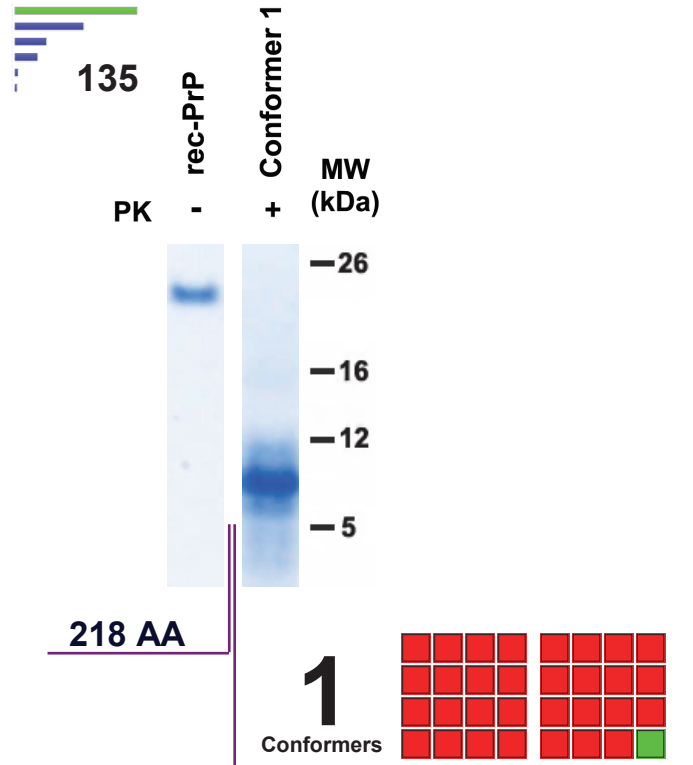

Tm<sup>Exp</sup>: ND  
ΔΔG: -5.19

### *In vitro* studies

TgVole (1x) Not tested

Black-capped squirrel monkey Not tested

### *In vivo* studies

TgVole (1x) Not tested

Black-capped squirrel monkey Not tested

pLDDT [86.67]

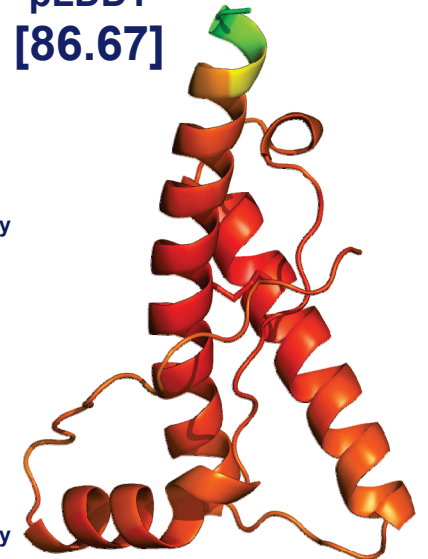

# Squirrel monkey

GenBank: U15165

P29%



0

## *Saimiri sciureus*

Primates 35/45  
Cebidae 7/8

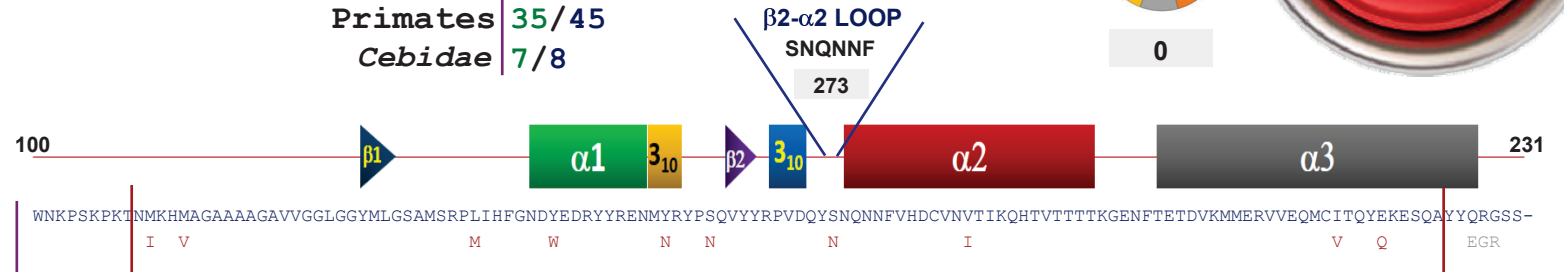

PrP sequence differs by 10 amino acids from the bank vole PrP (see in red)

No deletions  
No insertions  
It shows polymorphic variants

Tm<sup>Exp</sup>: ND

ΔΔG: -5.63

Distinct primary sequence across species

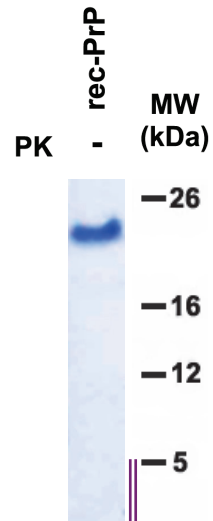

218 AA

0  
Conformers

NO  
MISFOLDING

*In vitro* studies

NOT  
APPLICABLE

*In vivo* studies

NOT  
APPLICABLE

pLDDT  
[84.64]

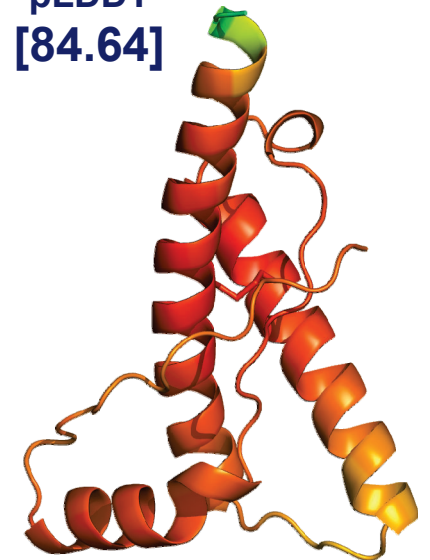

# Philippine tarsier

GenBank: XM\_021710036

P52%

17



10-20

## *Tarsius syrichta*

Primates 35/45

Tarsiidae 1/1

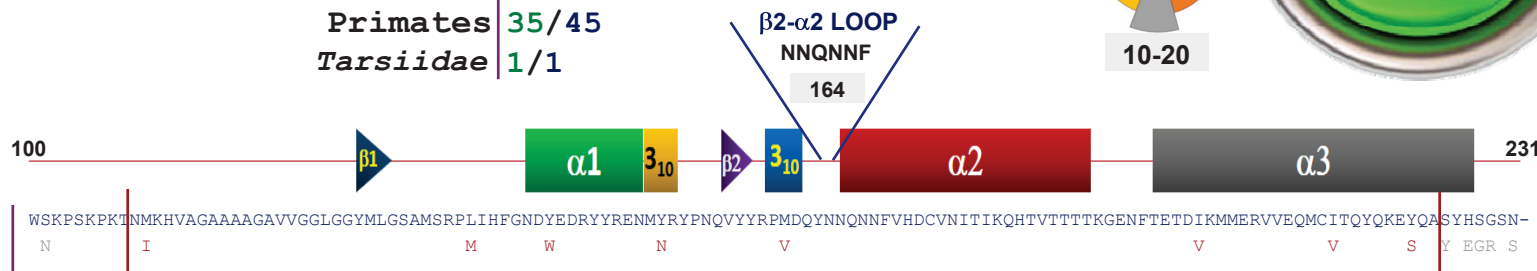

PrP sequence differs by 8 amino acids from the bank vole PrP (see in red)

- No deletions
- No insertions
- No polymorphic variants found

1 species sharing the same primary sequence

Horsfield's tarsier  
*Cephalopachus bancanus*

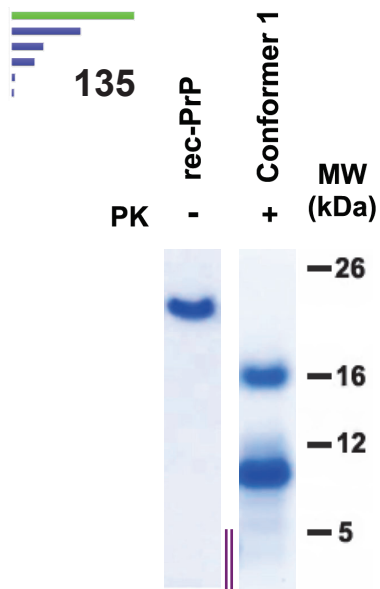

211 AA

1  
Conformers

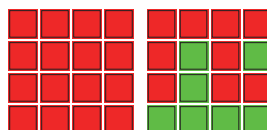

Tm<sup>Exp</sup>: ND

ΔΔG: -9.49

### *In vitro* studies

TgVole (1x) Not tested

Philippine tarsier Not tested

### *In vivo* studies

TgVole (1x) Not tested

Philippine tarsier Not tested

pLDDT  
[84.65]

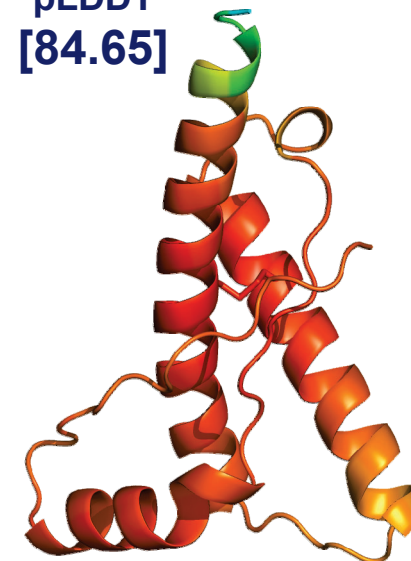

Distinct primary sequence across species

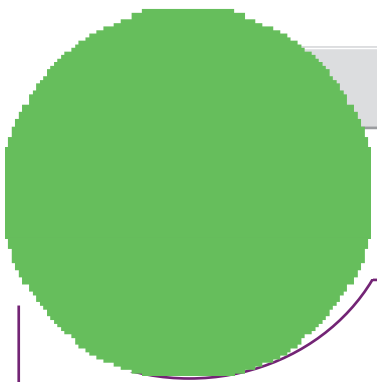

# Gelada

GenBank: XM\_025399776

P78%



60-70

## *Theropithecus gelada*

Primates 35/45

Cercopithecidae 7/7

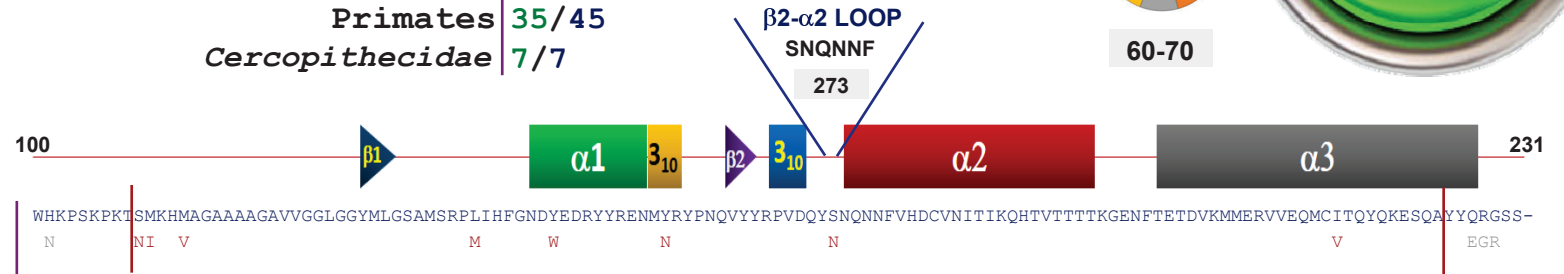

PrP sequence differs by 8 amino acids from the bank vole PrP (see in red)

- No deletions
- No insertions
- No polymorphic variants found

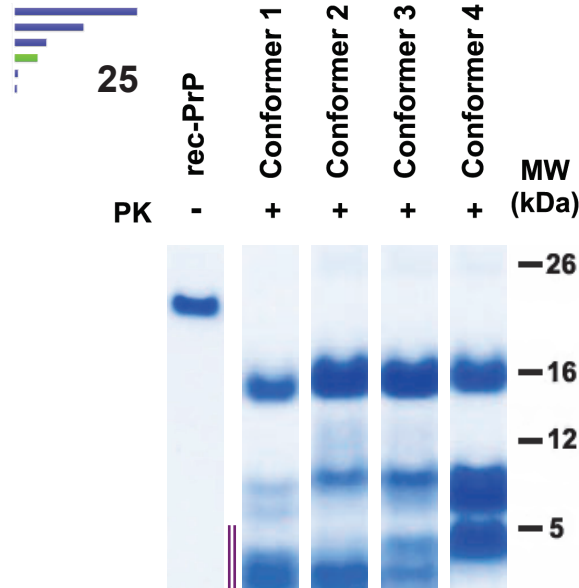

211 AA

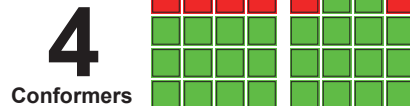

Tm<sup>Exp</sup>: ND

ΔΔG: -8.22

### *In vitro* studies

|             |            |
|-------------|------------|
| TgVole (1x) | Not tested |
| Gelada      | Not tested |

### *In vivo* studies

|             |            |
|-------------|------------|
| TgVole (1x) | Not tested |
| Gelada      | Not tested |

pLDDT [85.79]

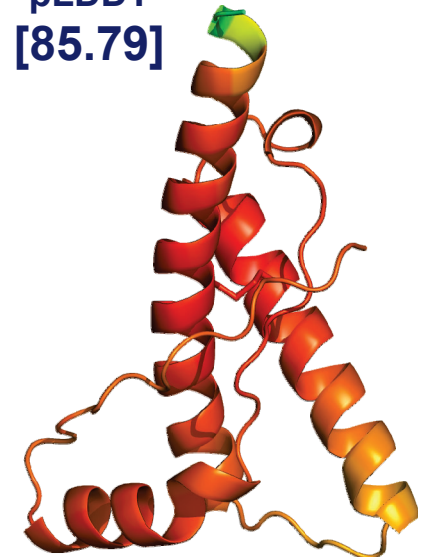

1 species sharing the same primary sequence

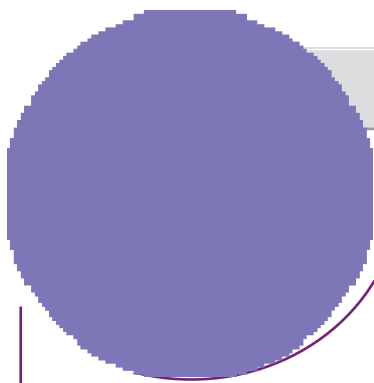

# Elephant

GenBank: EU588731

*Loxodonta africana*

Proboscidea 0/1

Elephantidae 0/1

P29%



0

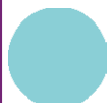

Asian elephant  
*Elephas maximus*

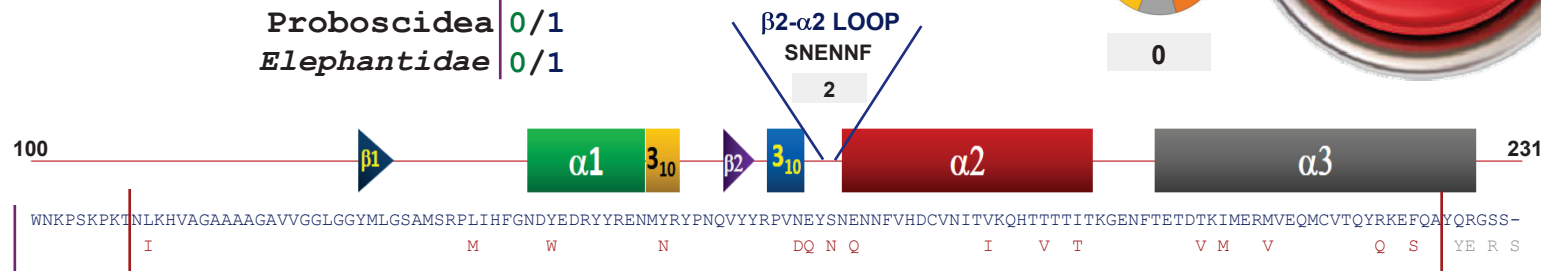

PrP sequence differs by 16 amino acids from the bank vole PrP (see in red)

- No deletions
- No insertions
- No polymorphic variants found

Tm<sup>Exp</sup>: ND

ΔΔG: ND

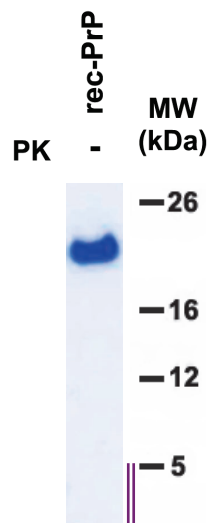

212 AA

0  
Conformers

**NO MISFOLDING**

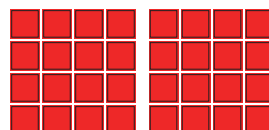

*In vitro* studies

**NOT APPLICABLE**

*In vivo* studies

**NOT APPLICABLE**

pLDDT [88.02]

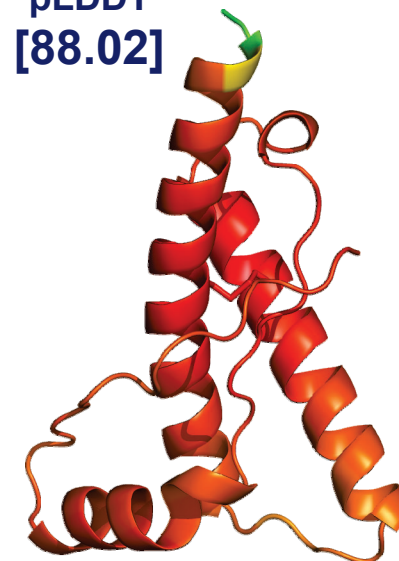



# Cairo spiny mouse

GenBank: EF467171

P90%

91.1



90-100

## *Acomys cahirinus*

Rodentia 81/101  
Muridae 16/18

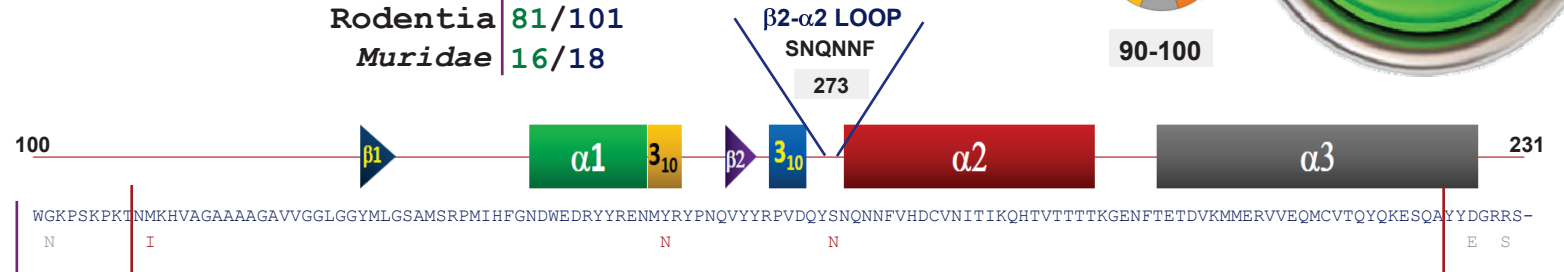

PrP sequence differs by 3 amino acids from the bank vole PrP (see in red)

No deletions  
No insertions  
No polymorphic variants found

Distinct primary sequence across species

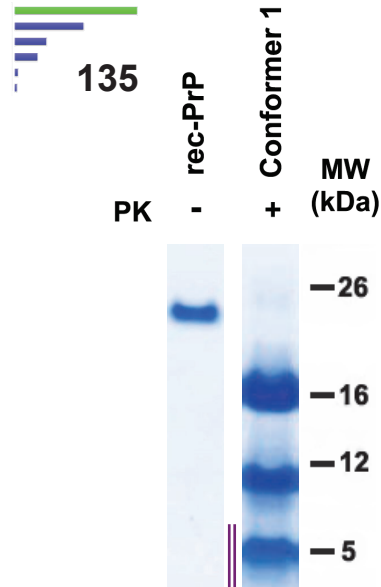

211 AA

1  
Conformers

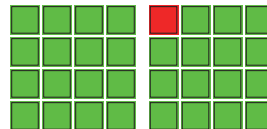

Tm<sup>Exp</sup>: ND

ΔΔG: -2.04

### *In vitro* studies

TgVole (1x) Not tested

Cairo spiny mouse Not tested

### *In vivo* studies

TgVole (1x) Not tested

Cairo spiny mouse Not tested

pLDDT  
[86.25]

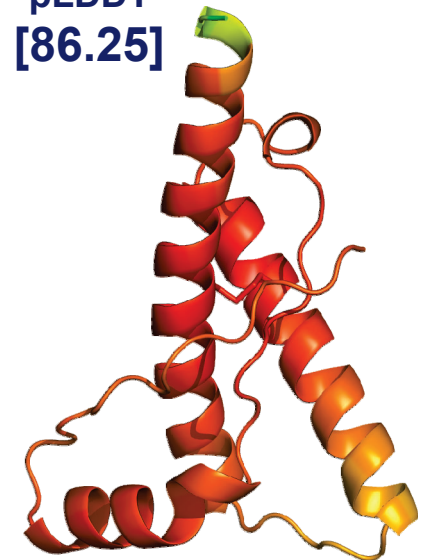

# Gobi jerboa

GenBank: **BK064143**

**P84%**

**78.6**

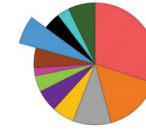

70-80

## *Allactaga bullata*

Rodentia **81/101**  
Dipodidae **3/3**

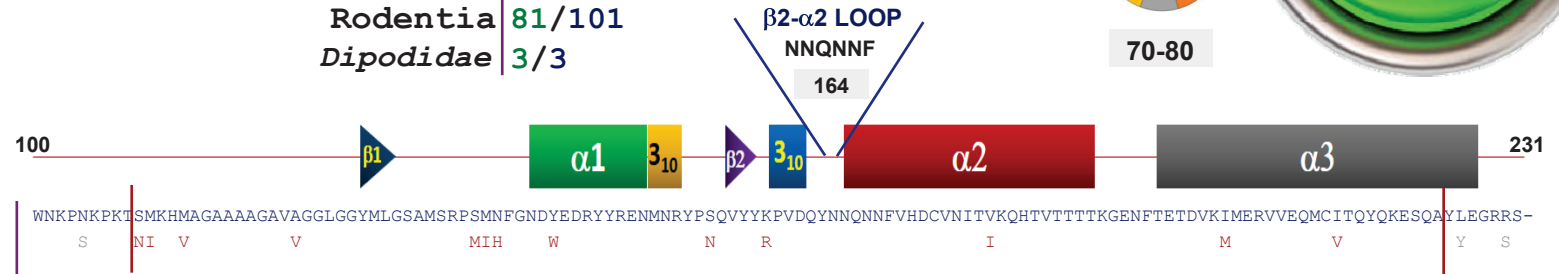

PrP sequence differs by 13 amino acids from the bank vole PrP (see in red)

- No deletions
- No insertions
- No polymorphic variants found

Distinct primary sequence across species

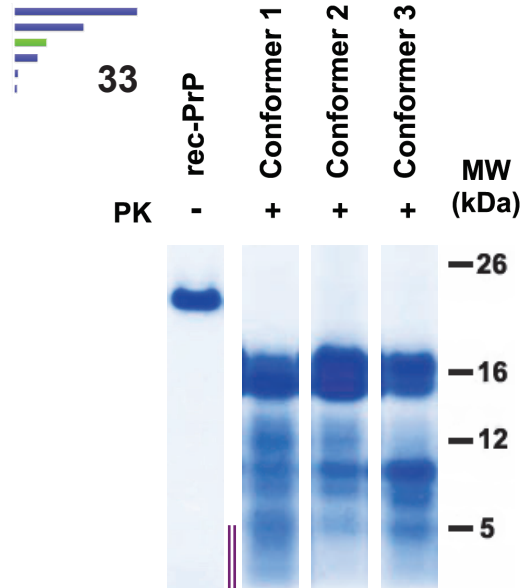

213 AA

**3**  
Conformers

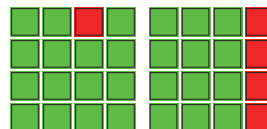

Tm<sup>Exp</sup>: ND

ΔΔG: **-10.12**

### *In vitro* studies

|             |            |
|-------------|------------|
| TgVole (1x) | Not tested |
| Gobi jerboa | Not tested |

### *In vivo* studies

|             |            |
|-------------|------------|
| TgVole (1x) | Not tested |
| Gobi jerboa | Not tested |

pLDDT  
**[85.38]**

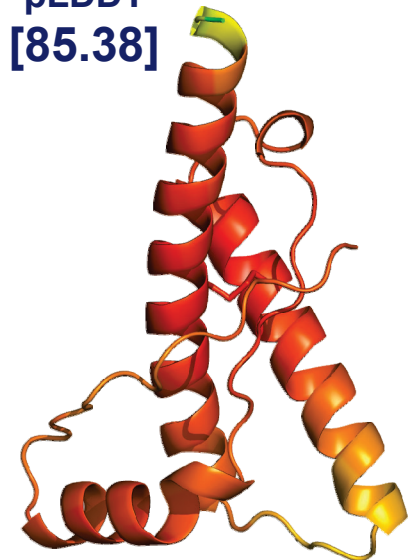

# Mountain beaver

GenBank: [BK064070](#)

P79%

71.1



70-80

## *Aplodontia rufa*

Rodentia 81/101

*Aplodontiidae* 1/1

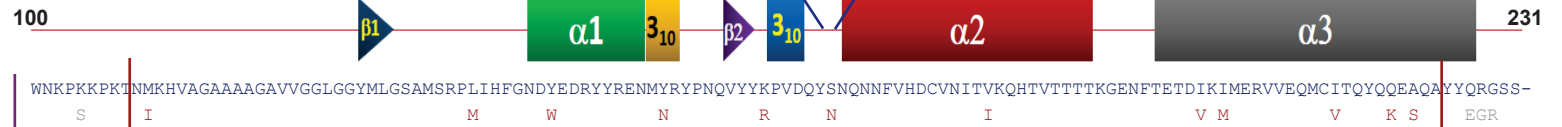

PrP sequence differs by 12 amino acids from the bank vole PrP (see in red)

No deletions  
No insertions  
No polymorphic variants found

Distinct primary sequence across species

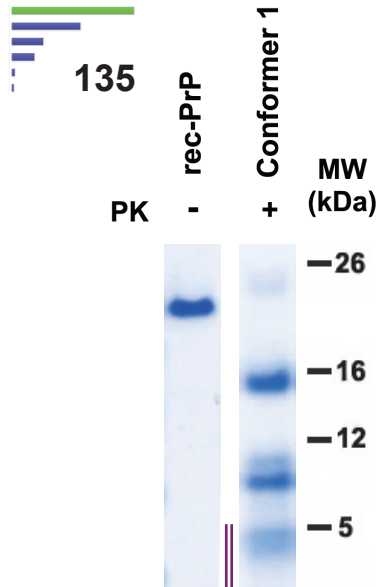

213 AA

1  
Conformers

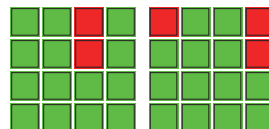

Tm<sup>Exp</sup>: ND

ΔΔG: -11.28

### *In vitro* studies

TgVole (1x) Not tested

Mountain beaver Not tested

### *In vivo* studies

TgVole (1x) Not tested

Mountain beaver Not tested

pLDDT [85.02]

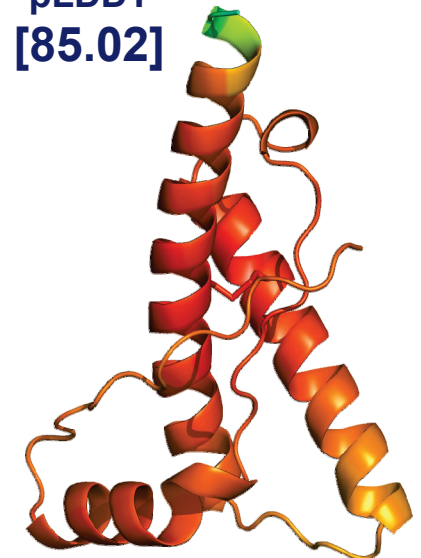

# Steppe field mouse

GenBank: KF466953

P61%

30.4



30-40

## *Apodemus fulvipectus*

Rodentia 81/101  
Muridae 16/18

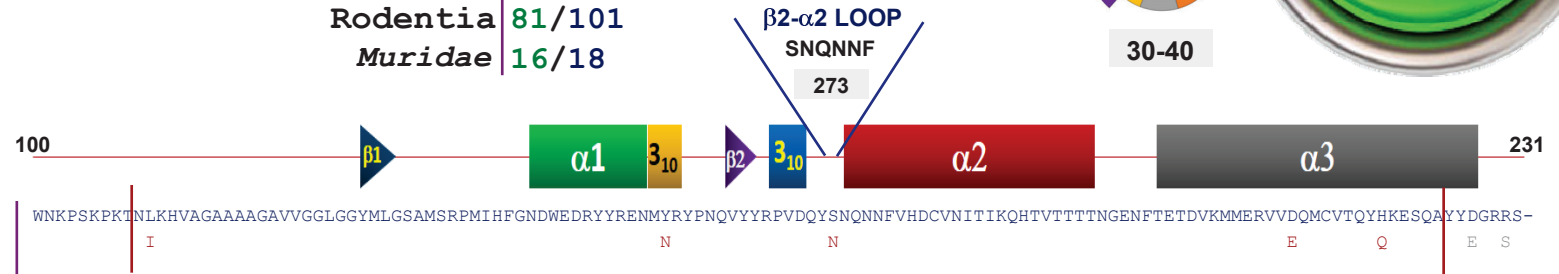

PrP sequence differs by 5 amino acids from the bank vole PrP (see in red)

No deletions  
No insertions  
No polymorphic variants found

Distinct primary sequence across species

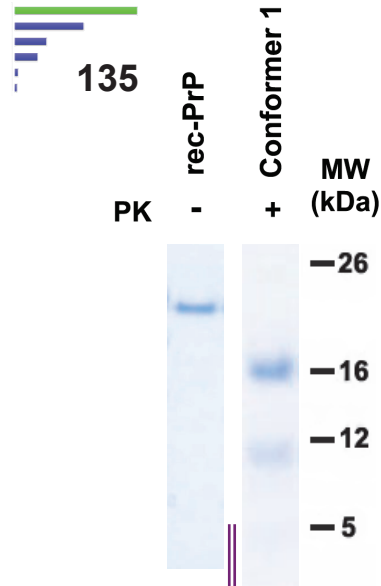

211 AA

1  
Conformers

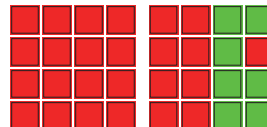

Tm<sup>Exp</sup>: ND

ΔΔG: -11.57

### *In vitro* studies

TgVole (1x) Not tested  
Steppe field mouse Not tested

### *In vivo* studies

TgVole (1x) Not tested  
Steppe field mouse Not tested

pLDDT [86.31]

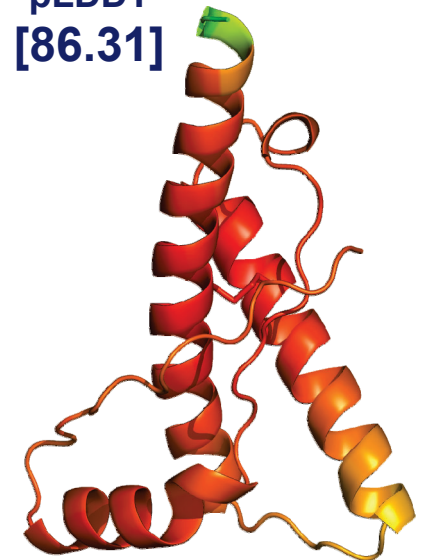

# African grass rat

GenBank: XM\_034493892

P100%

100



100

## *Arvicanthis niloticus*

Rodentia 81/101  
Muridae 16/18

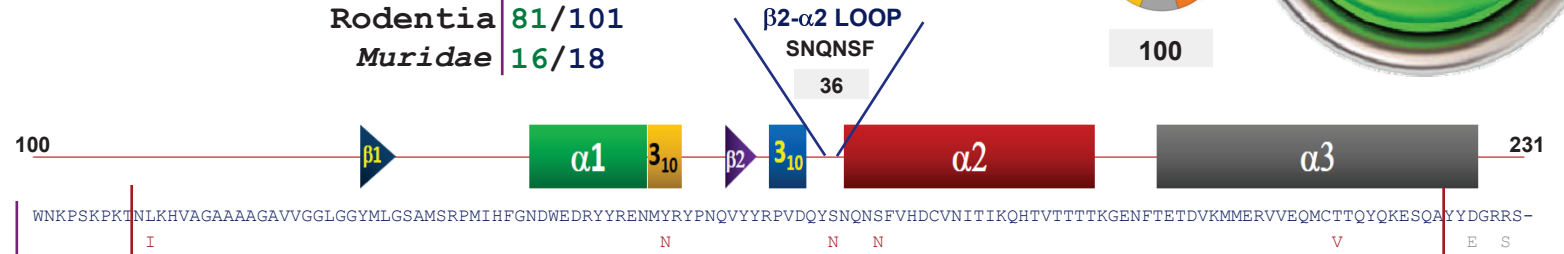

PrP sequence differs by 5 amino acids from the bank vole PrP (see in red)

No deletions  
No insertions  
No polymorphic variants found

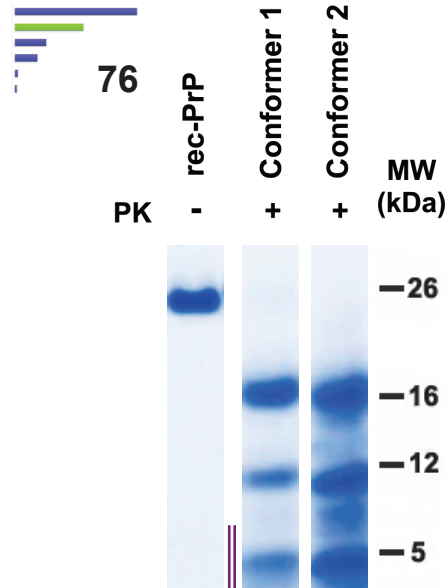

211 AA

2  
Conformers



Tm<sup>Exp</sup>: ND

ΔΔG: -5.57

### *In vitro* studies

TgVole (1x) Not tested

African grass rat Not tested

### *In vivo* studies

TgVole (1x) Not tested

African grass rat Not tested

pLDDT  
[86.26]

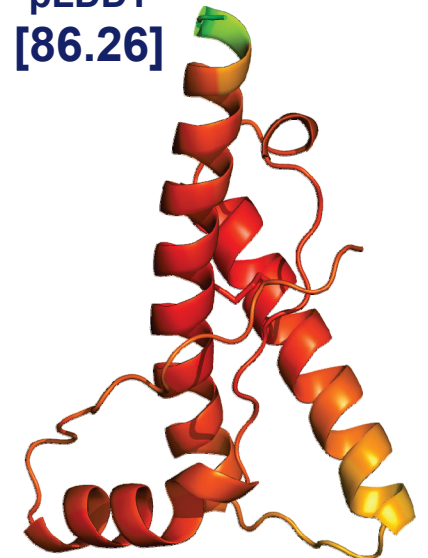

Distinct primary sequence across species

# European water vole

GenBank: **BK063953**

P60%

27.7



20-30

## Arvicola amphibius

Rodentia **81/101**  
Cricetidae **25/27**

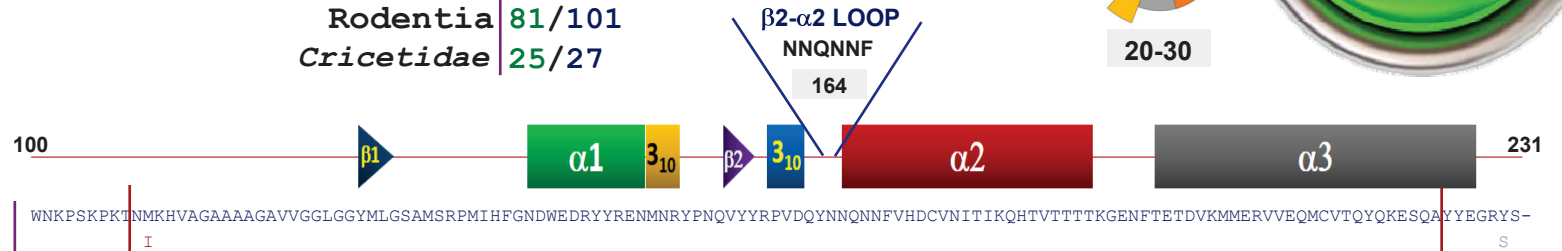

PrP sequence differs by 1 amino acids from the bank vole PrP (see in red)

No deletions  
No insertions  
No polymorphic variants found

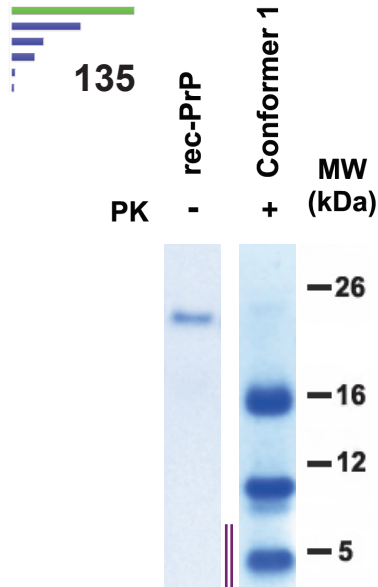

210 AA

1  
Conformers

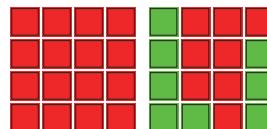

Tm<sup>Exp</sup>: ND  
 $\Delta\Delta G$ : **-0.51**

### In vitro studies

TgVole (1x) Not tested

European water vole Not tested

### In vivo studies

TgVole (1x) Not tested

European water vole Not tested

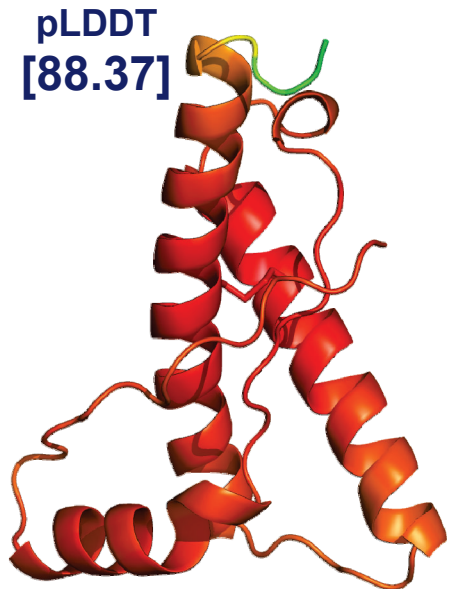

1 species sharing the same primary sequence

Gerbe's vole  
*Microtus gerbei*

# Greater bandicoot rat

GenBank: KF466950

P100%

100



100

## *Bandicota indica*

Rodentia 81/101  
Muridae 16/18

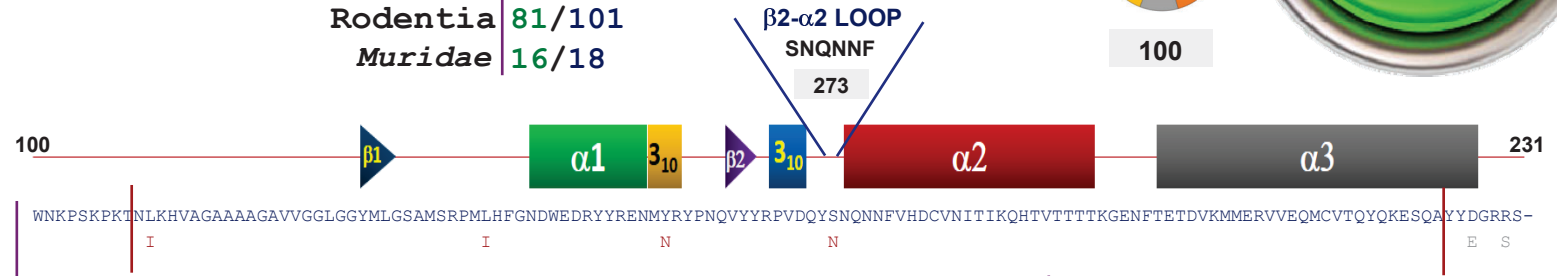

PrP sequence differs by 4 amino acids from the bank vole PrP (see in red)

No deletions  
No insertions  
No polymorphic variants found

Tm<sup>Exp</sup>: ND

ΔΔG: -9.35

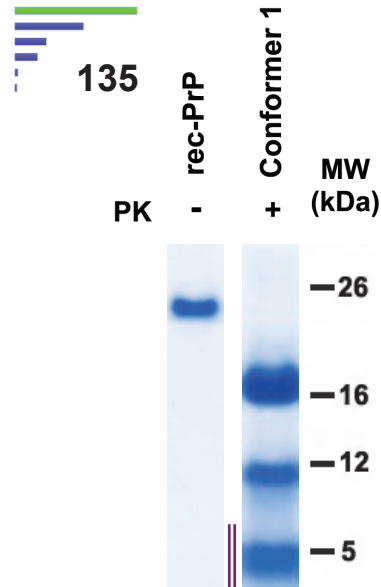

210 AA

1

Conformers

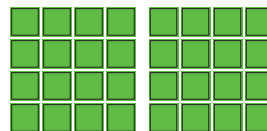

### *In vitro* studies

TgVole (1x) Not tested

Greater bandicoot rat Not tested

### *In vivo* studies

TgVole (1x) Not tested

Greater bandicoot rat Not tested

pLDDT [86.4]

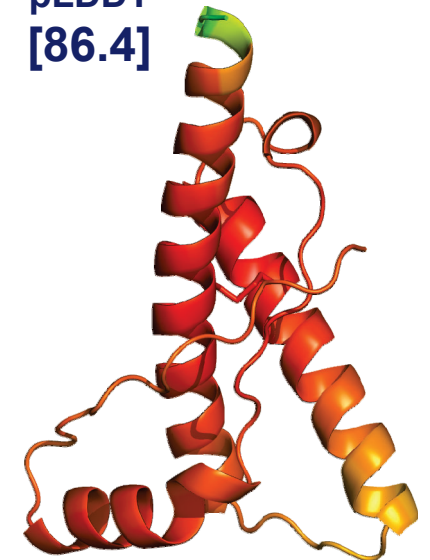

5 species sharing the same primary sequence

- Savile's bandicoot rat *Bandicota savilei*
- Small white-toothed rat *Berylmys berdmorei*
- Edwards's long-tailed giant rat *Leopoldamys edwardsi*
- Long-tailed giant rat *Leopoldamys sabanus*
- Polynesian rat *Rattus exulans*

# Desmarest's hutia

GenBank: **BK064046**

## Capromys pilorides

Rodentia **81/101**  
Capromyidae **0/1**

P29%

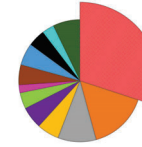

0

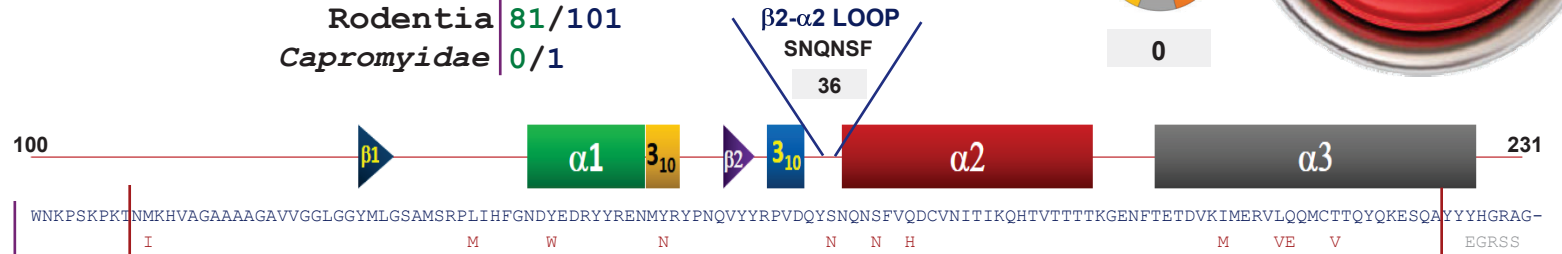

PrP sequence differs by 11 amino acids from the bank vole PrP (see in red)

- No deletions
- No insertions
- No polymorphic variants found

T<sub>m</sub><sup>Exp</sup>: ND

ΔΔG: ND

Distinct primary sequence across species

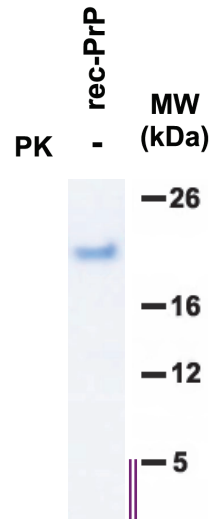

202 AA

**0**  
Conformers

**NO MISFOLDING**

*In vitro* studies

**NOT APPLICABLE**

*In vivo* studies

**NOT APPLICABLE**

pLDDT  
**[83.65]**

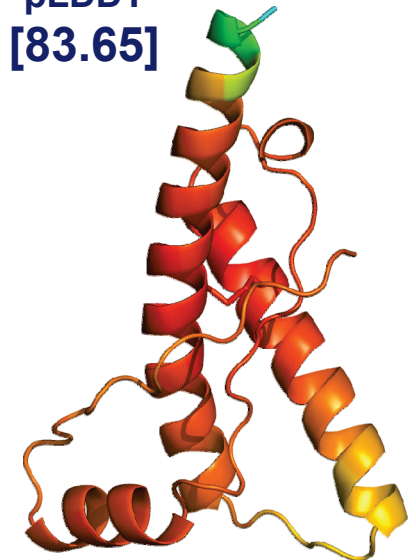



# North American beaver

GenBank: XM\_020184027

P84%

78.2



70-80

## Castor canadensis

Rodentia 81/101  
Castoridae 1/1

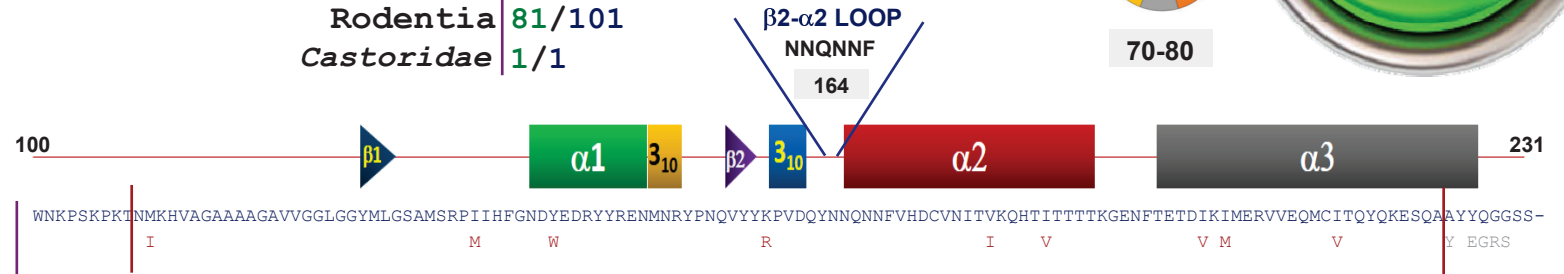

PrP sequence differs by 9 amino acids from the bank vole PrP (see in red)

No deletions  
No insertions  
No polymorphic variants found

Distinct primary sequence across species

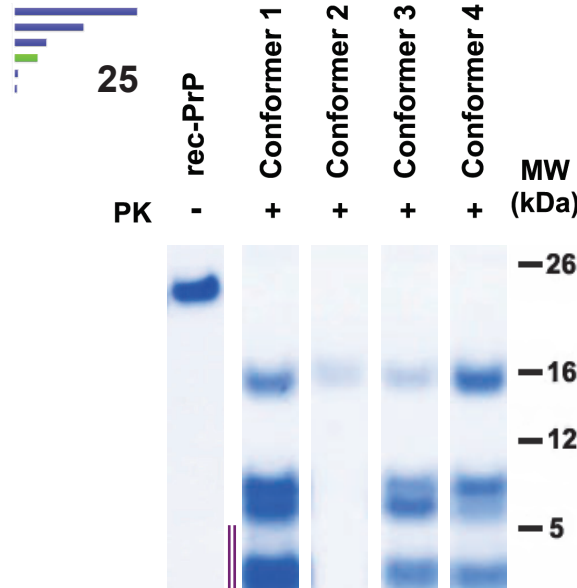

225 AA

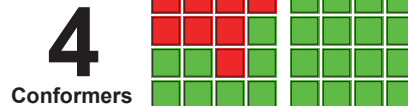

Tm<sup>Exp</sup>: ND  
ΔΔG: ND

### In vitro studies

TgVole (1x) Not tested  
North American beaver Not tested

### In vivo studies

TgVole (1x) Not tested  
North American beaver Not tested

pLDDT [84.13]

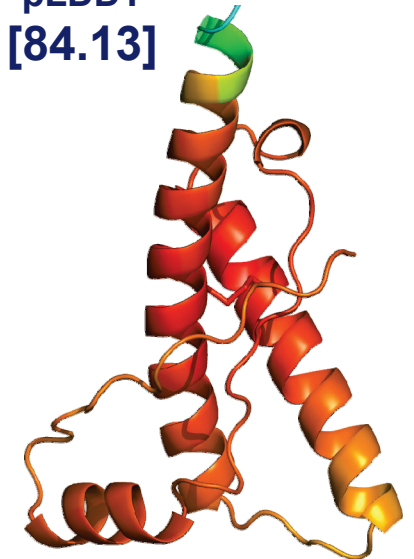

# Brazilian guinea pig

GenBank: KM357834

P29%



0

## *Cavia aperea*

Rodentia 81/101  
Caviidae 1/5

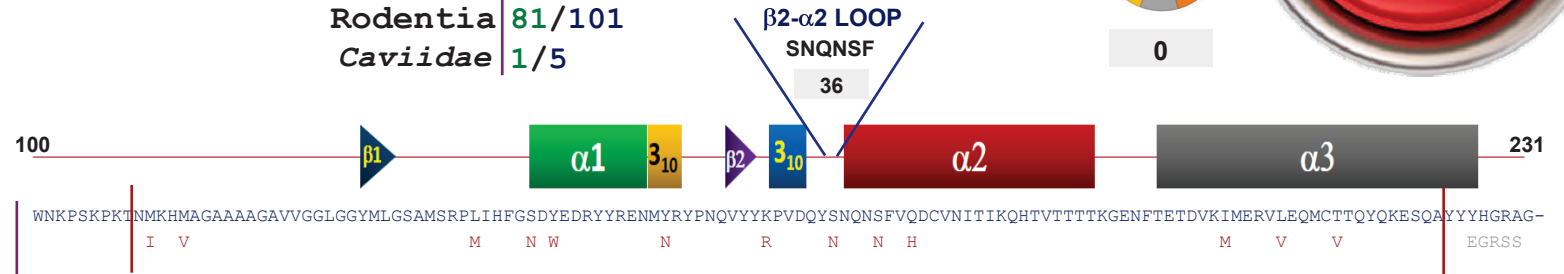

PrP sequence differs by 13 amino acids from the bank vole PrP (see in red)

No deletions  
No insertions  
No polymorphic variants found

T<sub>m</sub><sup>Exp</sup>: ND

ΔΔG: ND

Distinct primary sequence across species

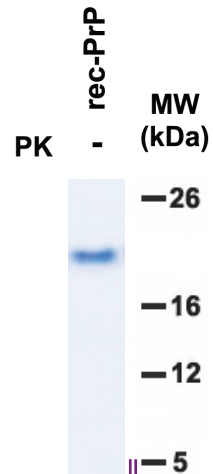

202 AA

0  
Conformers

**NO  
MISFOLDING**

*In vitro* studies

**NOT  
APPLICABLE**

*In vivo* studies

**NOT  
APPLICABLE**

pLDDT  
[84.41]

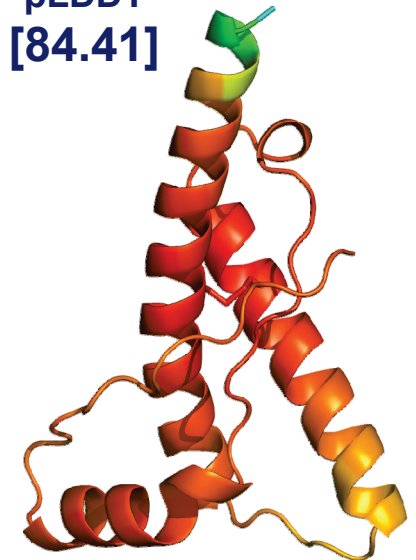

# Guinea pig

GenBank: XM\_003476602

P29%



0

## *Cavia porcellus*

Rodentia 81/101  
Caviidae 1/5

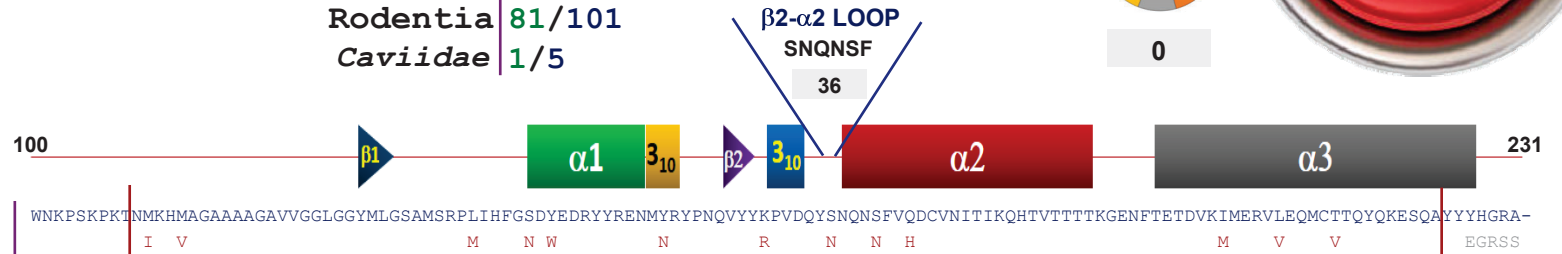

PrP sequence differs by 13 amino acids from the bank vole PrP (see in red)

- No deletions
- No insertions
- No polymorphic variants found

Tm<sup>Exp</sup>: ND

ΔΔG: -6.62

Distinct primary sequence across species

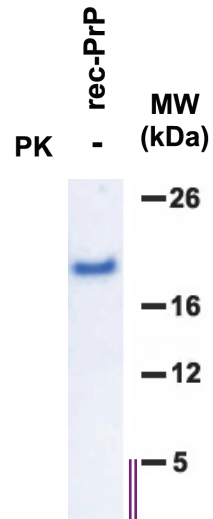

201 AA

**NO MISFOLDING**

0 Conformers



*In vitro* studies

**NOT APPLICABLE**

*In vivo* studies

**NOT APPLICABLE**

pLDDT [85.43]

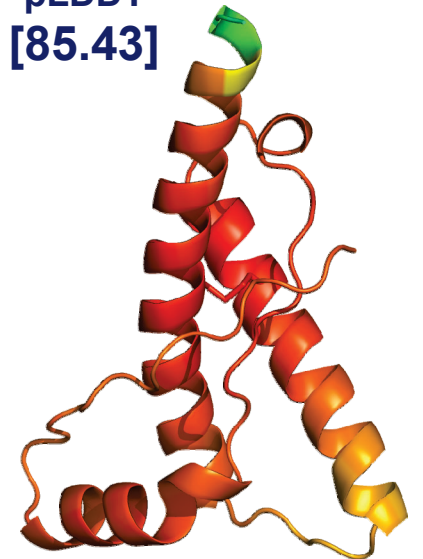

# Montane guinea pig

GenBank: **BK063938**

P72%

53.2



50-60

## *Cavia tschudii*

Rodentia 81/101  
Caviidae 1/5

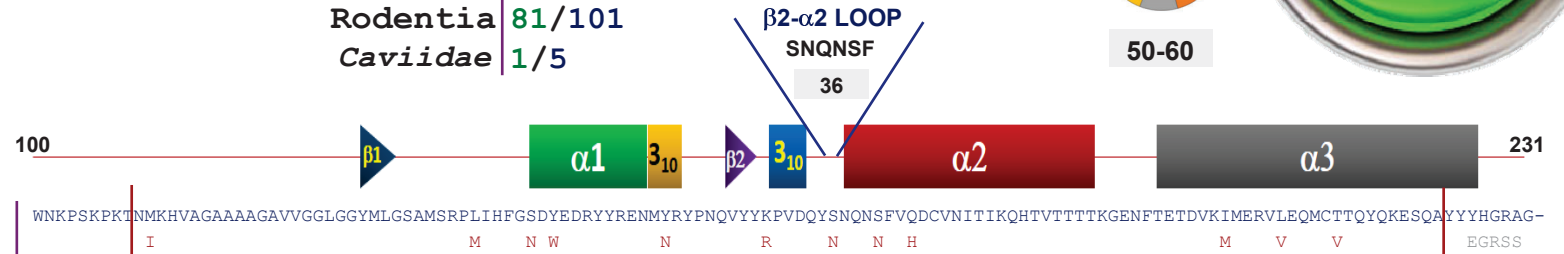

PrP sequence differs by 12 amino acids from the bank vole PrP (see in red)

No deletions  
No insertions  
No polymorphic variants found

Distinct primary sequence across species

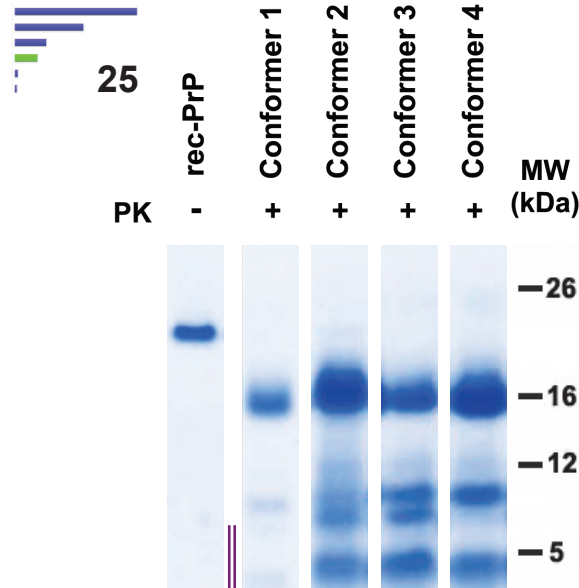

202 AA

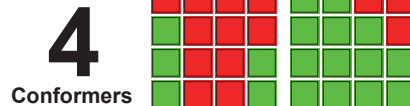

Tm<sup>Exp</sup>: ND  
ΔΔG: ND

### *In vitro* studies

TgVole (1x) **Propagate**  
Montane guinea pig **Ongoing**

### *In vivo* studies

TgVole (1x) **Ongoing**  
Montane guinea pig **Not tested**

pLDDT [84.32]

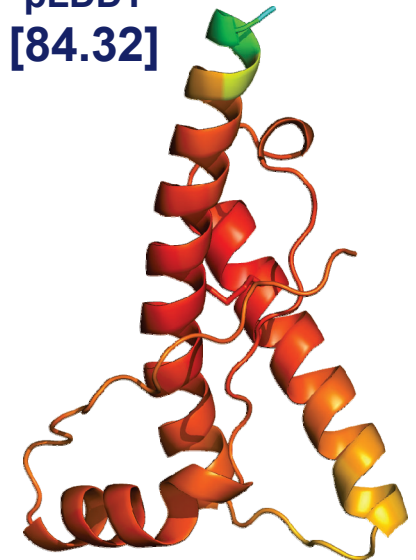

# Long-tailed chinchilla

GenBank: XM\_005380818

P54%

18.8



## *Chinchilla lanigera*

Rodentia 81/101

Chinchillidae 1/1

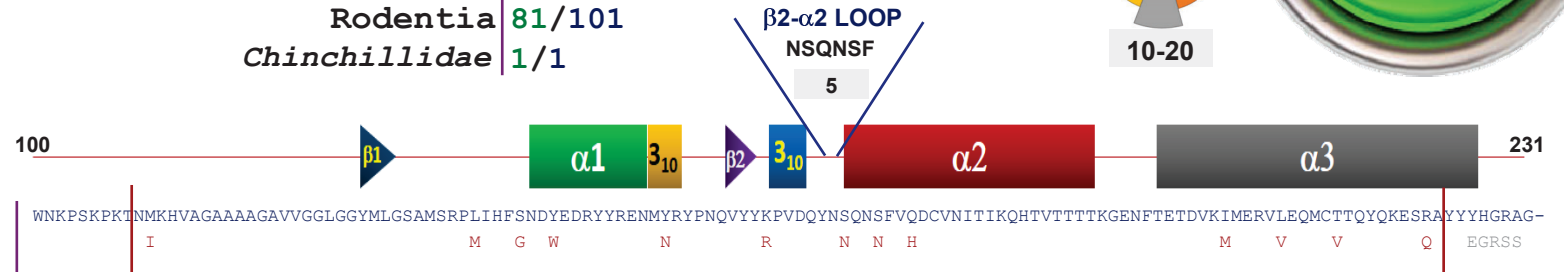

PrP sequence differs by 13 amino acids from the bank vole PrP (see in red)

- No deletions
- No insertions
- No polymorphic variants found

Distinct primary sequence across species

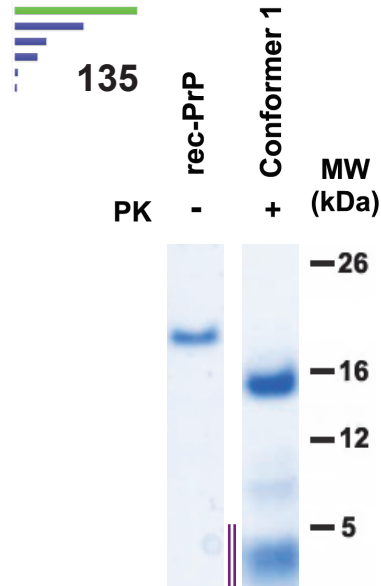

202 AA

1  
Conformers

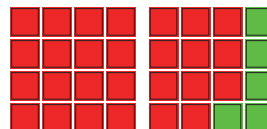

Tm<sup>Exp</sup>: ND

ΔΔG: ND

### *In vitro* studies

TgVole (1x) **Propagate**

Long-tailed chinchilla **Ongoing**

### *In vivo* studies

TgVole (1x) **Ongoing**

Long-tailed chinchilla **Not tested**

pLDDT  
[83.93]

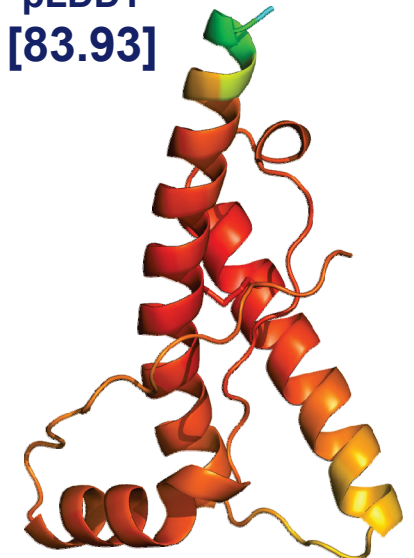

# Brazilian porcupine

GenBank: **OR47272**

P29%



0

## Coendou prehensilis

Rodentia **81/101**

Erethizontidae **0/2**

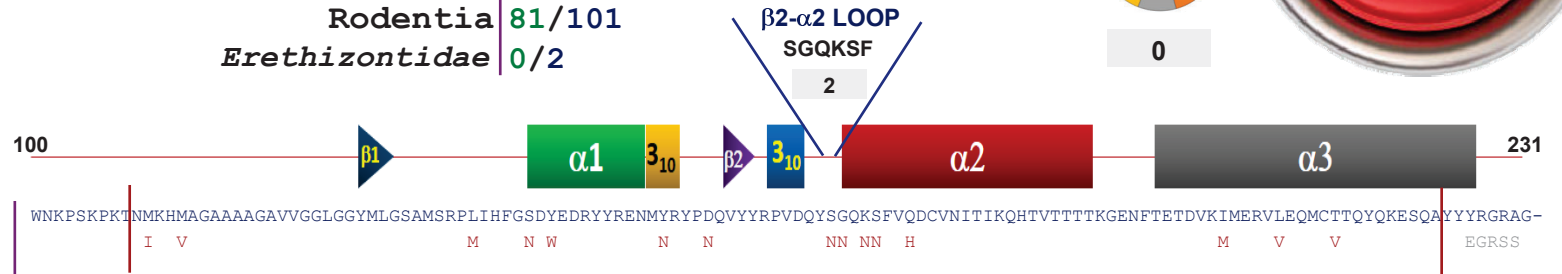

PrP sequence differs by 15 amino acids from the bank vole PrP (see in red)

- No deletions
- No insertions
- No polymorphic variants found

Tm<sup>Exp</sup>: ND

ΔΔG: ND

Distinct primary sequence across species

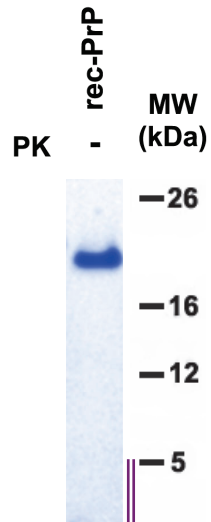

202 AA

**0**  
Conformers

**NO MISFOLDING**



*In vitro* studies

**NOT APPLICABLE**

*In vivo* studies

**NOT APPLICABLE**

pLDDT [86.71]

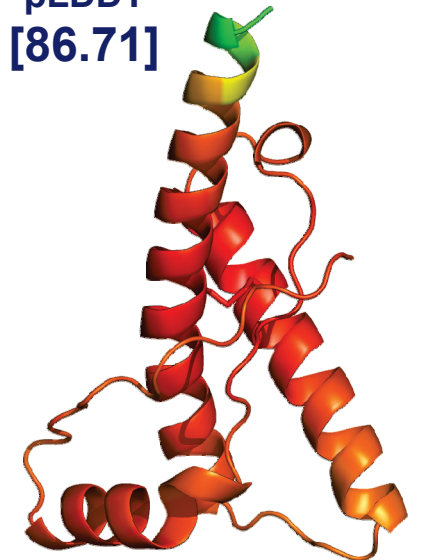

# Gambian pouched rat

GenBank: **BK063941**

P40%

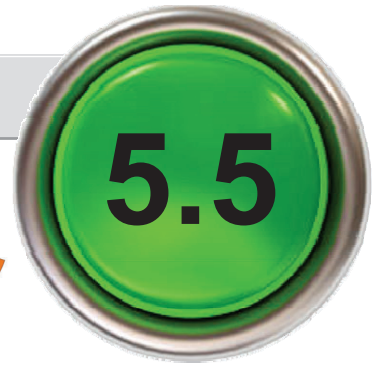

0-10

## *Cricetomys gambianus*

Rodentia 81/101  
Nesomyidae 1/1

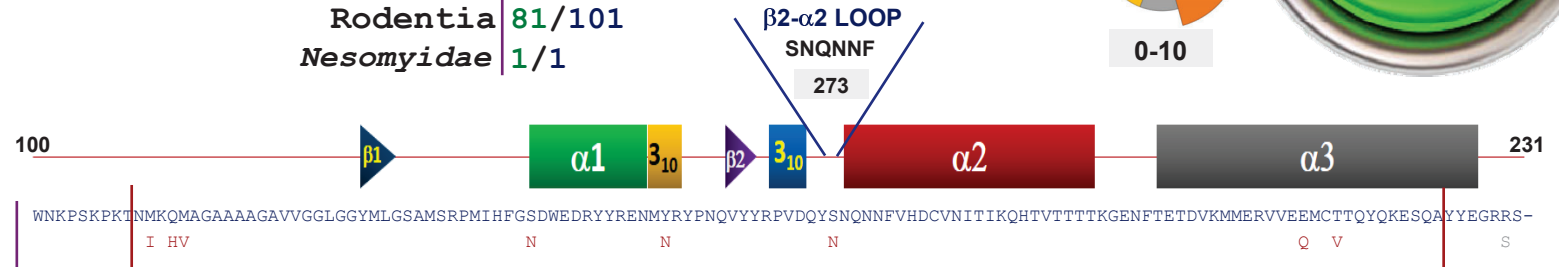

PrP sequence differs by 8 amino acids from the bank vole PrP (see in red)

No deletions  
No insertions  
No polymorphic variants found

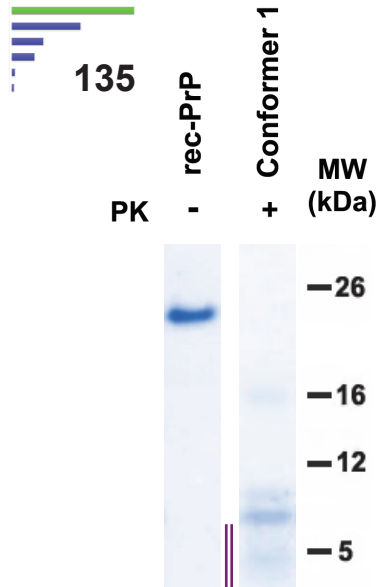

214 AA

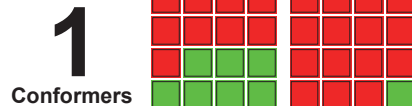

Tm<sup>Exp</sup>: ND  
 $\Delta\Delta G$ : -4.31

### *In vitro* studies

TgVole (1x) Not tested

Gambian pouched rat Not tested

### *In vivo* studies

TgVole (1x) Not tested

Gambian pouched rat Not tested

pLDDT [88.39]

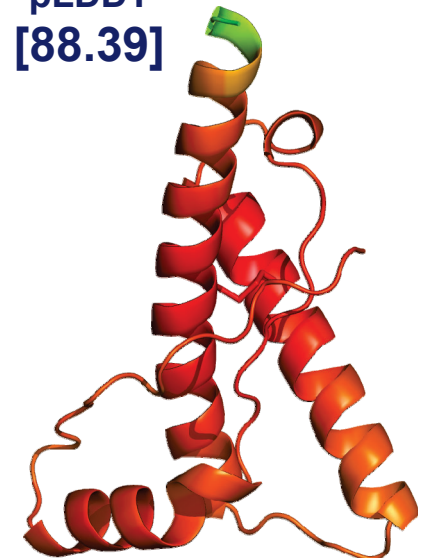

1 species sharing the same primary sequence

Southern giant pouched rat  
*Cricetomys ansorgei*

# Chinese hamster

GenBank: M33958

P88%

85.7



80-90

## *Cricetulus barabensis*

Rodentia 81/101  
Cricetidae 25/27

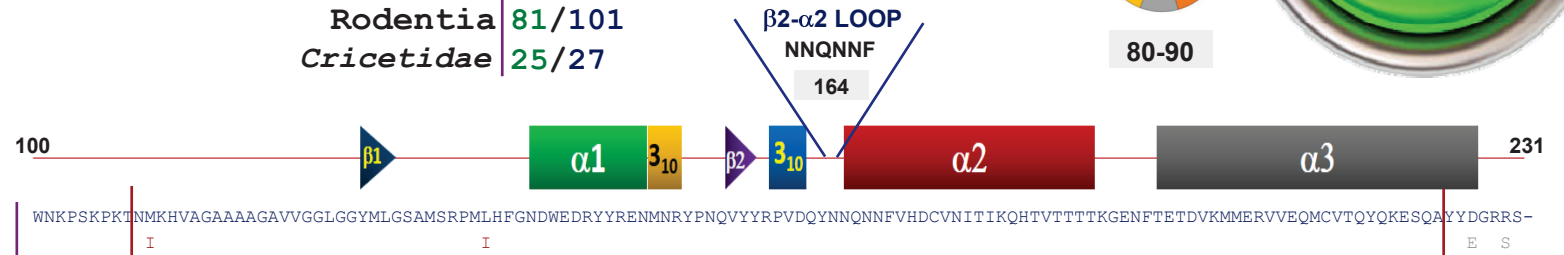

PrP sequence differs by 2 amino acids from the bank vole PrP (see in red)

No deletions  
No insertions  
No polymorphic variants found

Distinct primary sequence across species

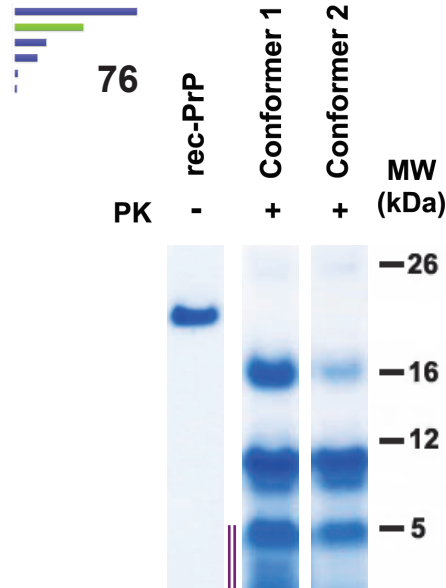

211 AA

2  
Conformers

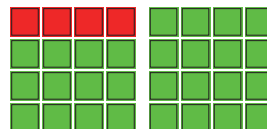

Tm<sup>Exp</sup>: ND  
ΔΔG: -4.97

### *In vitro* studies

TgVole (1x) Not tested  
Chinese hamster Not tested

### *In vivo* studies

TgVole (1x) Not tested  
Chinese hamster Not tested

pLDDT [86.17]

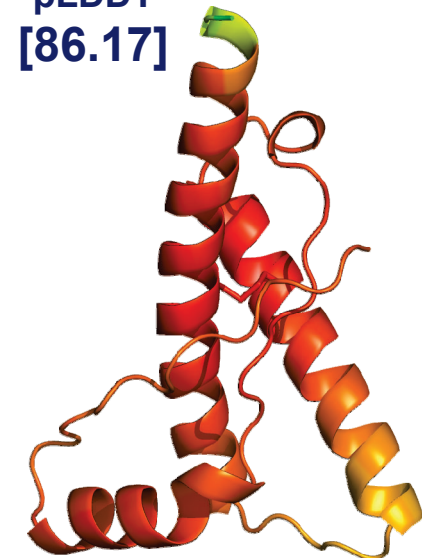



# Armenian hamster

GenBank: M33959

P91%

92.9



90-100

## *Cricetulus migratorius*

Rodentia 81/101  
Cricetidae 25/27

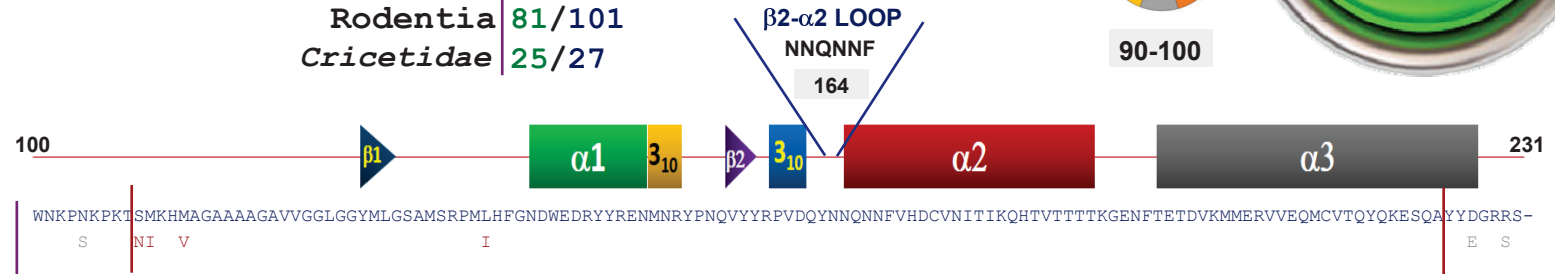

PrP sequence differs by 4 amino acids from the bank vole PrP (see in red)

No deletions  
No insertions  
No polymorphic variants found

Distinct primary sequence across species

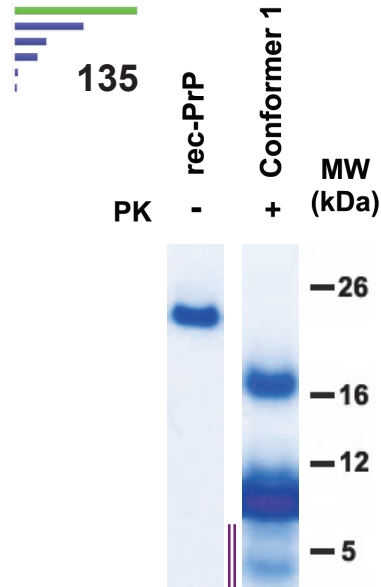

211 AA

1  
Conformers

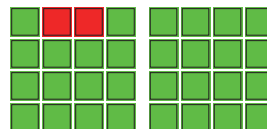

Tm<sup>Exp</sup>: ND

ΔΔG: -7.18

### *In vitro* studies

TgVole (1x) Not tested

Armenian hamster Not tested

### *In vivo* studies

TgVole (1x) Not tested

Armenian hamster Not tested

pLDDT  
[86.22]

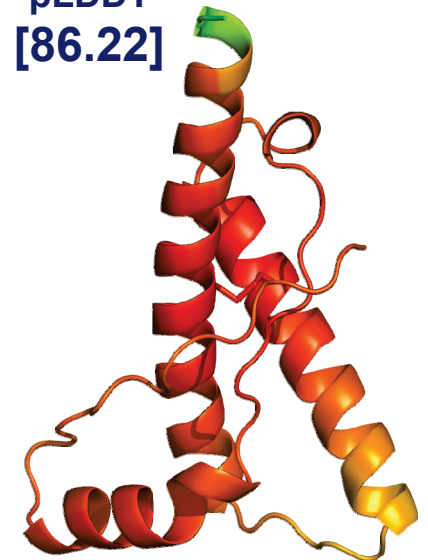

# Damaraland mole-rat

GenBank: XM\_010607544

P49%

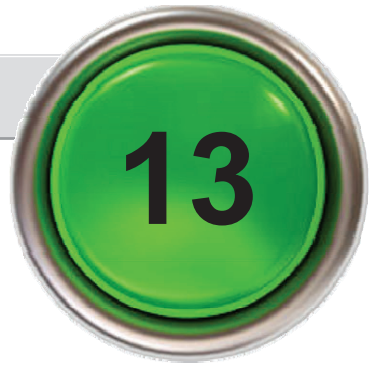

## Cryptomys damarensis

Rodentia 81/101  
Bathyergidae 2/3

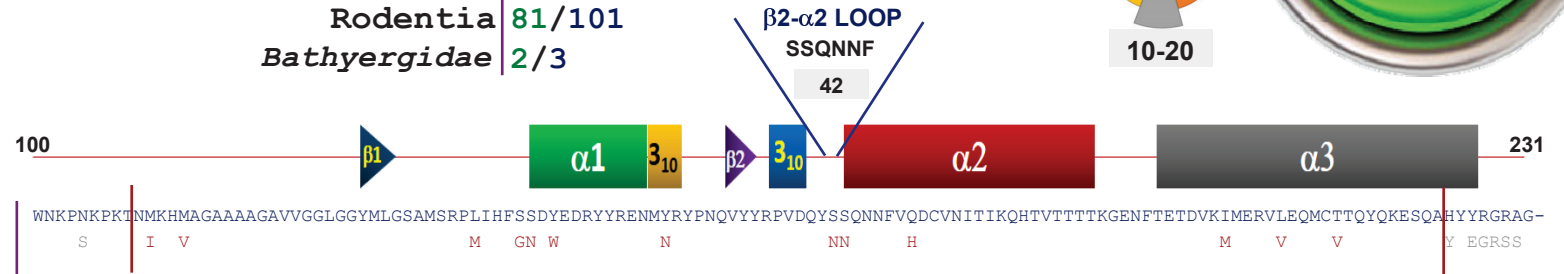

PrP sequence differs by 13 amino acids from the bank vole PrP (see in red)

No deletions  
No insertions  
No polymorphic variants found

Distinct primary sequence across species

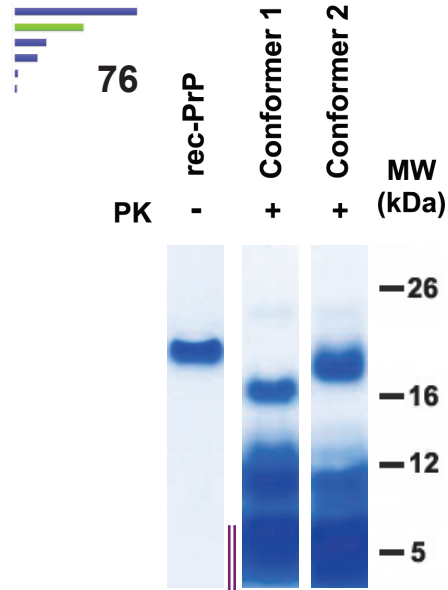

194 AA

2  
Conformers

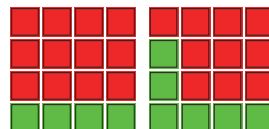

Tm<sup>Exp</sup>: ND  
ΔΔG: ND

### In vitro studies

TgVole (1x) Not tested  
Damaraland mole-rat Not tested

### In vivo studies

TgVole (1x) Not tested  
Damaraland mole-rat Not tested

pLDDT  
[87.29]

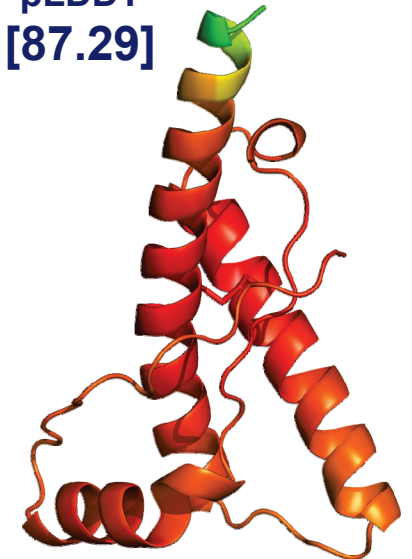

# Mashona mole-rat

GenBank: **BK064181**

P46%

10.7



10-20

## *Cryptomys darlingi*

Rodentia 81/101

Bathyergidae 2/3

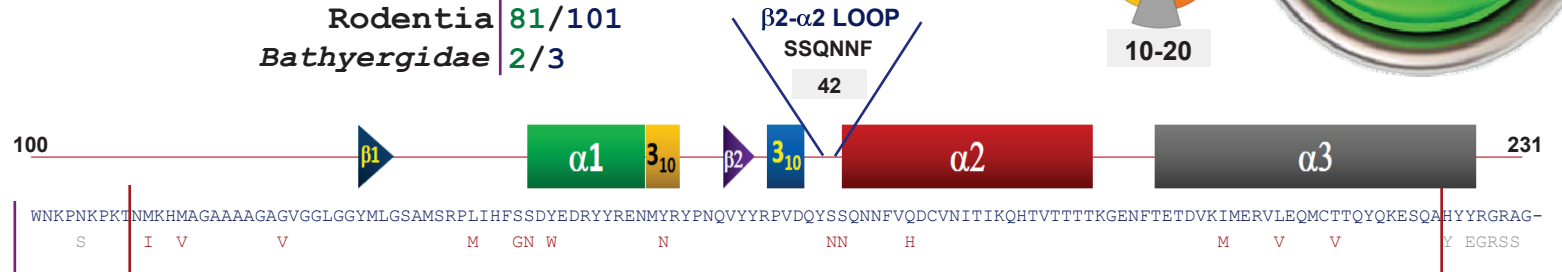

PrP sequence differs by 14 amino acids from the bank vole PrP (see in red)

- No deletions
- No insertions
- No polymorphic variants found

Distinct primary sequence across species

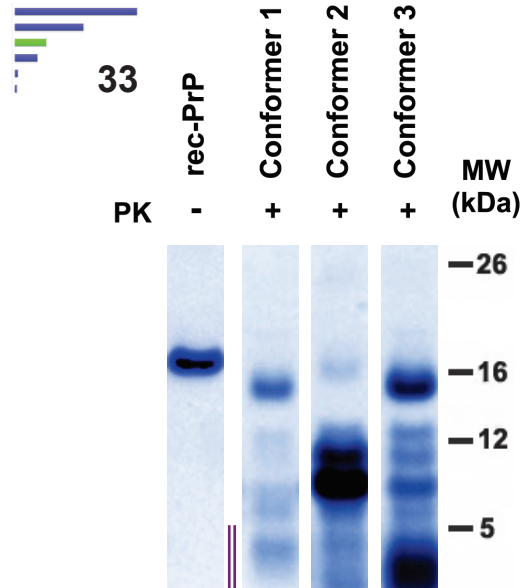

178 AA

3 Conformers

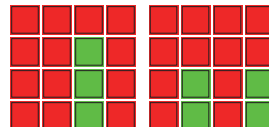

Tm<sup>Exp</sup>: ND

ΔΔG: ND

### *In vitro* studies

- TgVole (1x) Not tested
- Mashona mole-rat Not tested

### *In vivo* studies

- TgVole (1x) Not tested
- Mashona mole-rat Not tested

pLDDT [87.08]

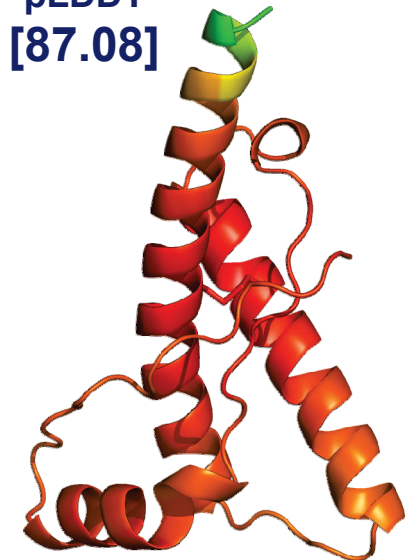

Distinct primary sequence across species

# Common gundi

GenBank: **BK063949**

## *Ctenodactylus gundi*

Rodentia **81/101**  
*Ctenodactylidae* **1/1**

**P79%**



70-80

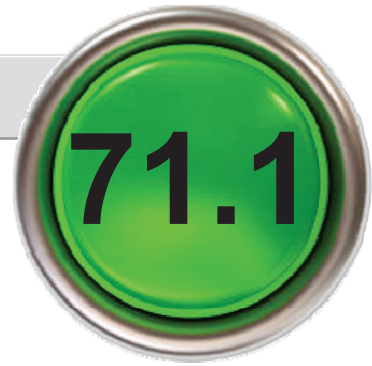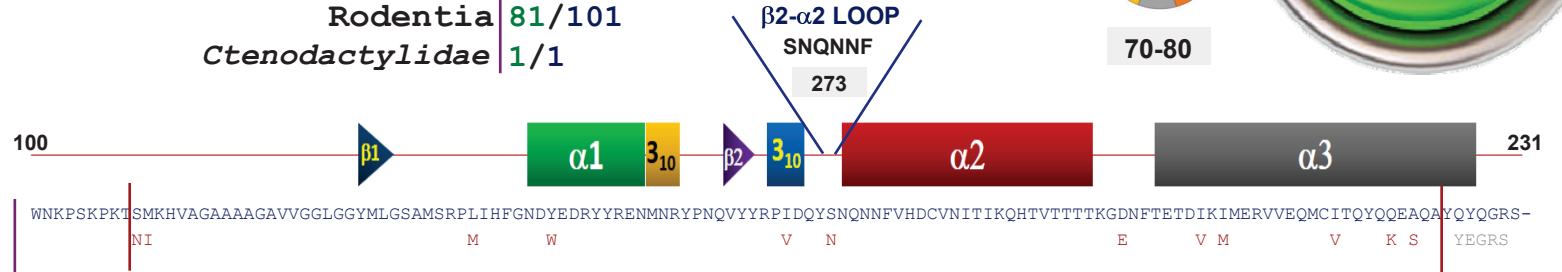

PrP sequence differs by 12 amino acids from the bank vole PrP (see in red)

- No deletions
- No insertions
- No polymorphic variants found

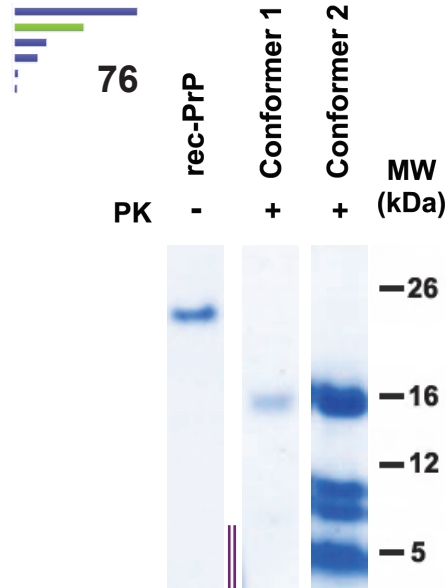

210 AA

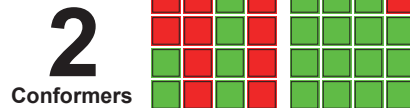

$T_m^{Exp}$ : ND  
 $\Delta\Delta G$ : -6.5

### *In vitro* studies

- TgVole (1x) Not tested
- Common gundi Not tested

### *In vivo* studies

- TgVole (1x) Not tested
- Common gundi Not tested

pLDDT [86.49]

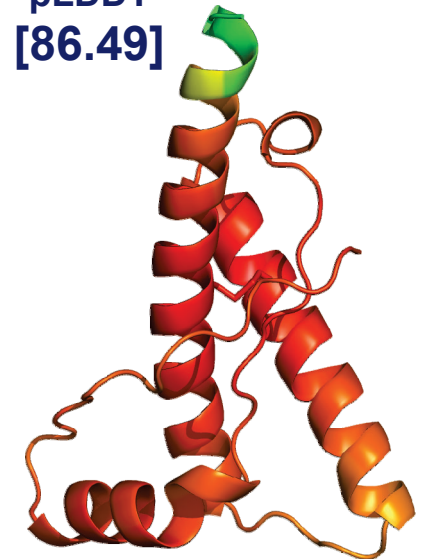

Distinct primary sequence across species

# Social tuco-tuco

GenBank: **BK063951**

*Ctenomys sociabilis*

Rodentia 81/101  
*Ctenomyidae* 1/1

P60%

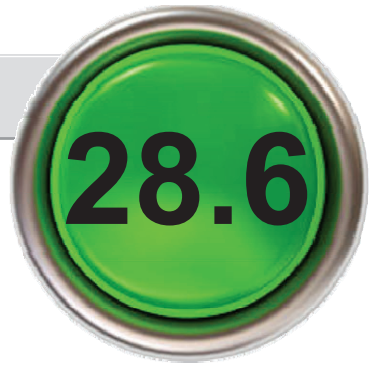

20-30

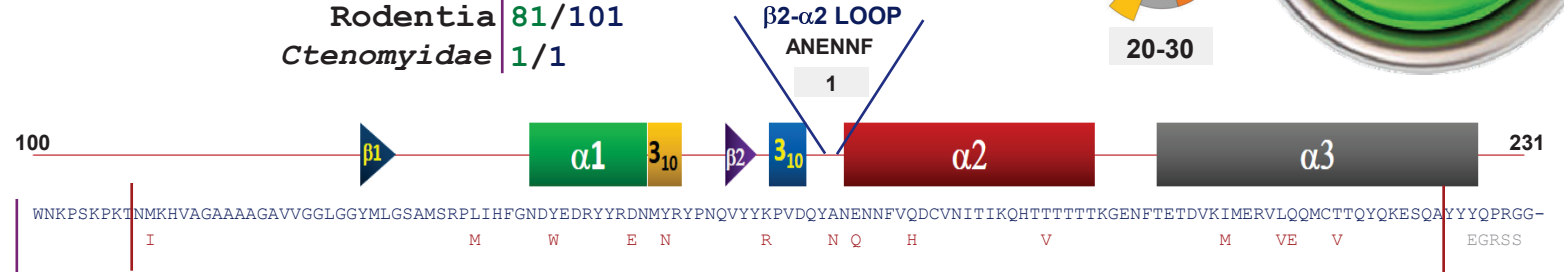

PrP sequence differs by 14 amino acids from the bank vole PrP (see in red)

No deletions  
No insertions  
No polymorphic variants found

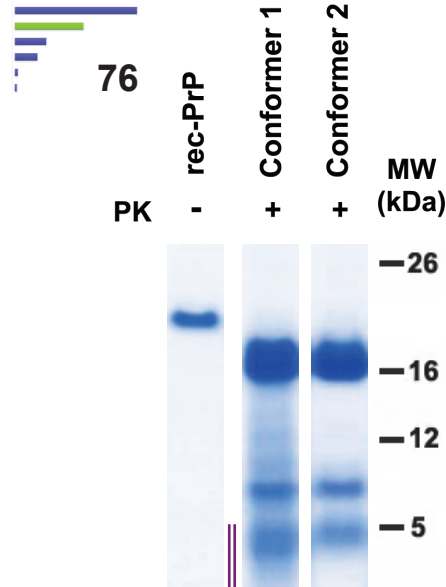

203 AA

2  
Conformers

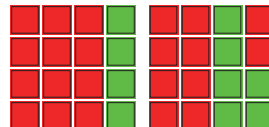

$T_m^{Exp}$ : ND  
 $\Delta\Delta G$ : ND

*In vitro* studies

TgVole (1x) Not tested

Social tuco-tuco Not tested

*In vivo* studies

TgVole (1x) Not tested

Social tuco-tuco Not tested

pLDDT  
[83.95]

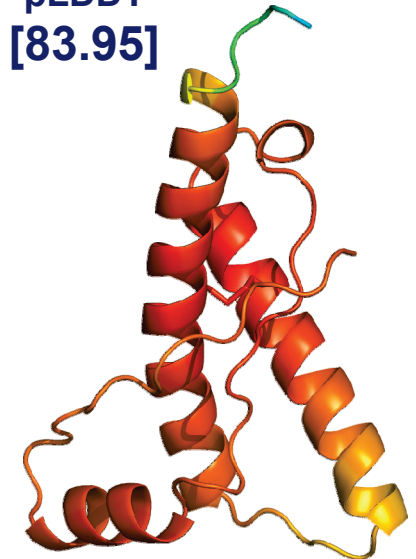

# Central American agouti

GenBank: **BK063998**

P45%

10.4

## *Dasyprocta punctata*

Rodentia 81/101

*Dasyproctidae* 1/1

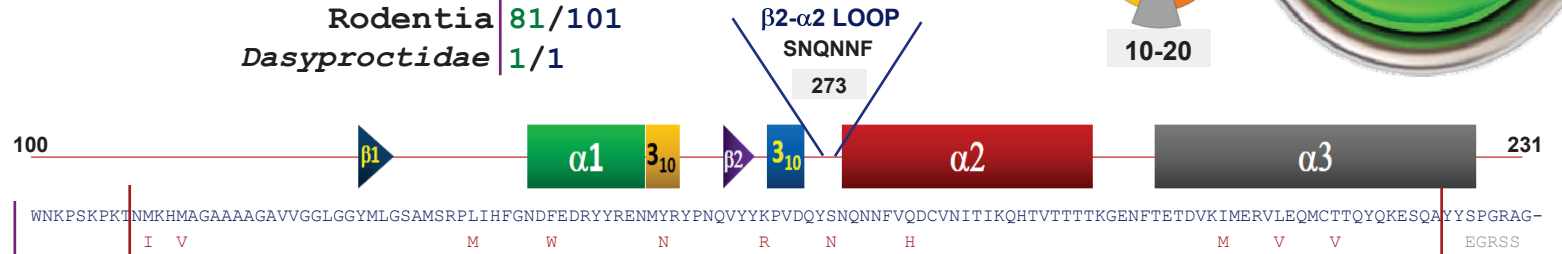

PrP sequence differs by 11 amino acids from the bank vole PrP (see in red)

No deletions  
No insertions  
No polymorphic variants found

Distinct primary sequence across species

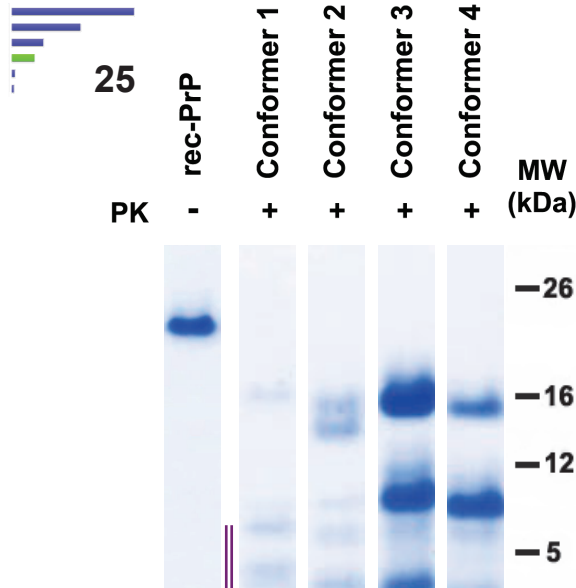

202 AA

4  
Conformers

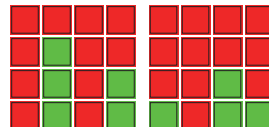

$T_m^{Exp}$ : ND  
 $\Delta\Delta G$ : ND

### *In vitro* studies

TgVole (1x) Not tested  
Central American agouti Not tested

### *In vivo* studies

TgVole (1x) Not tested  
Central American agouti Not tested

pLDDT [83.85]

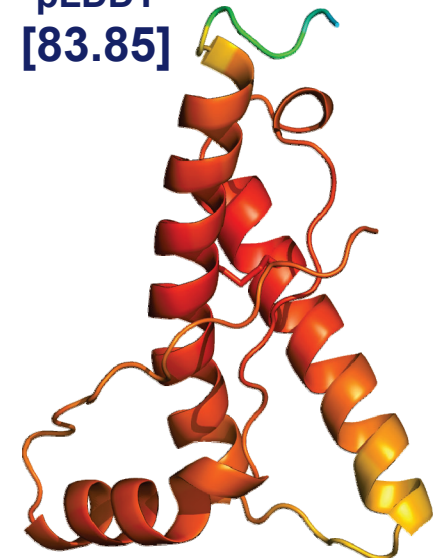

# Pacarana

GenBank: **BK063954**

**P59%**

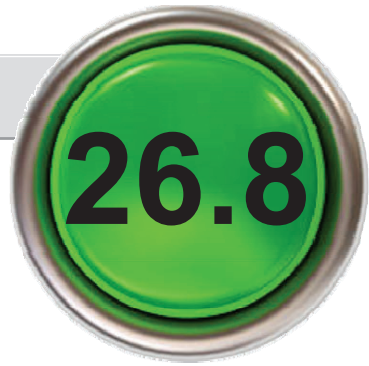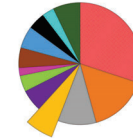

20-30

## *Dinomys branickii*

Rodentia **81/101**  
Dinomyidae **1/1**

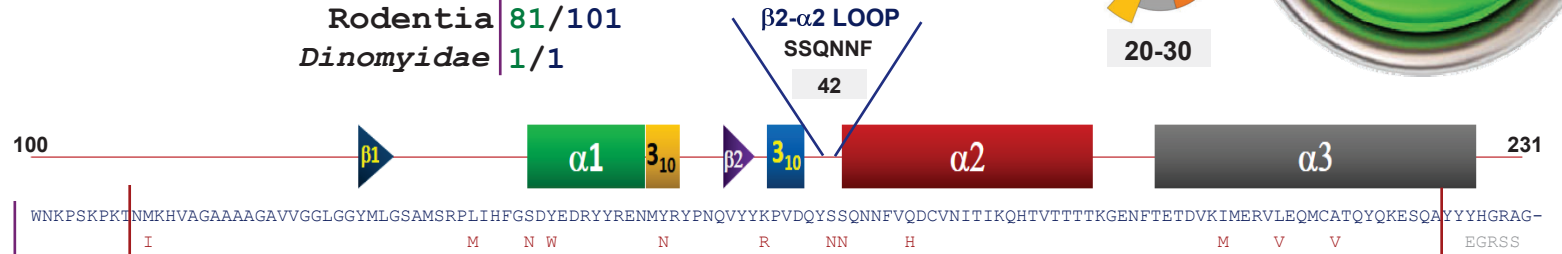

PrP sequence differs by 12 amino acids from the bank vole PrP (see in red)

No deletions  
No insertions  
No polymorphic variants found

Distinct primary sequence across species

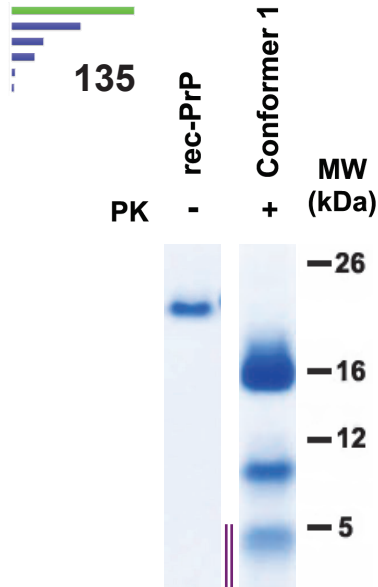

204 AA

**1**  
Conformers

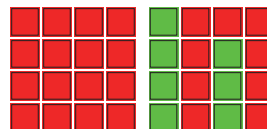

Tm<sup>Exp</sup>: ND  
ΔΔG: ND

### *In vitro* studies

TgVole (1x) Not tested  
Pacarana Not tested

### *In vivo* studies

TgVole (1x) Not tested  
Pacarana Not tested

pLDDT  
[84.46]

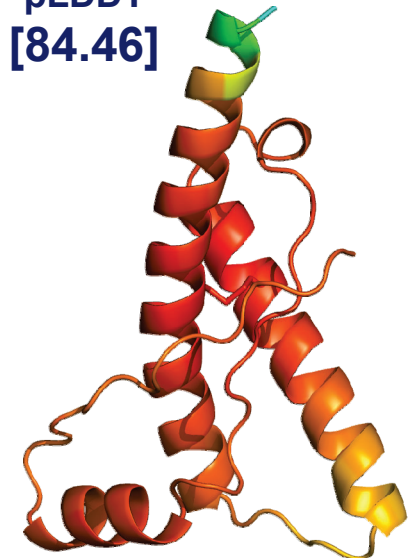

# Merriam's kangaroo rat

GenBank: **BK064205**

P91%

92.9



90-100

## *Dipodomys merriami*

Rodentia 81/101  
Heteromyidae 5/5

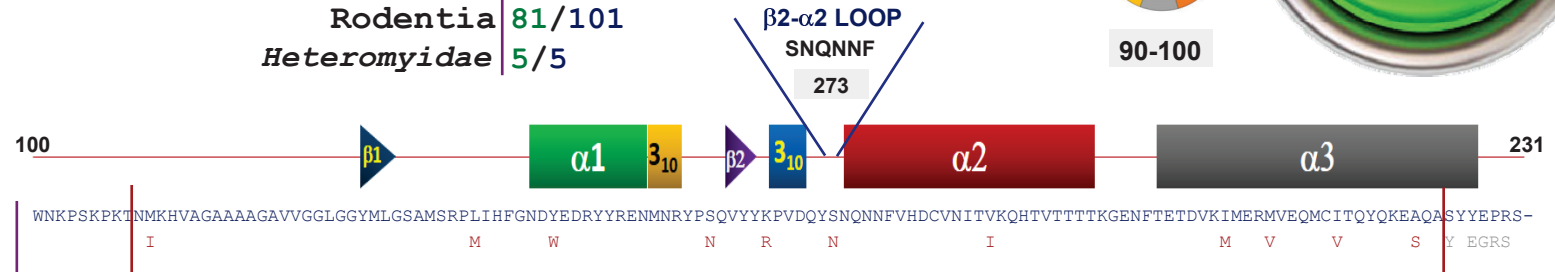

PrP sequence differs by 11 amino acids from the bank vole PrP (see in red)

No deletions  
No insertions  
No polymorphic variants found

Distinct primary sequence across species

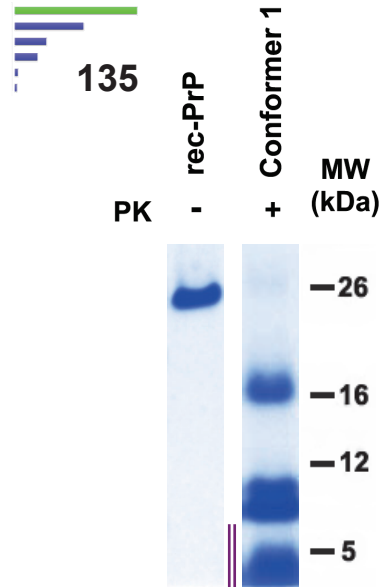

211 AA

1  
Conformers

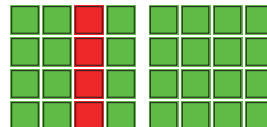

Tm<sup>Exp</sup>: ND  
ΔΔG: 1.98

### *In vitro* studies

TgVole (1x) Not tested  
Merriam's kangaroo rat Not tested

### *In vivo* studies

TgVole (1x) Not tested  
Merriam's kangaroo rat Not tested

pLDDT [84.87]

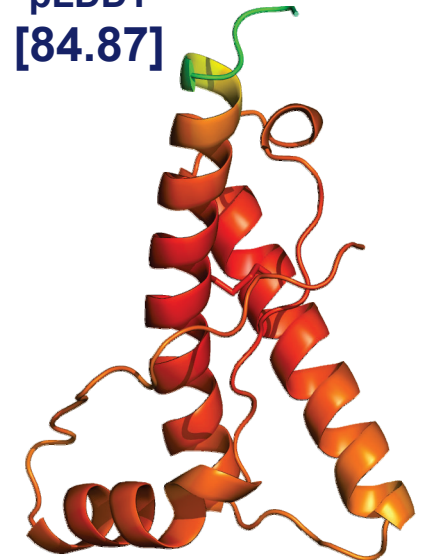



# Ord's kangaroo rat

GenBank: XM\_013010955

P85%

81.8

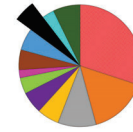

80-90

## Dipodomys ordii

Rodentia 81/101

Heteromyidae 5/5

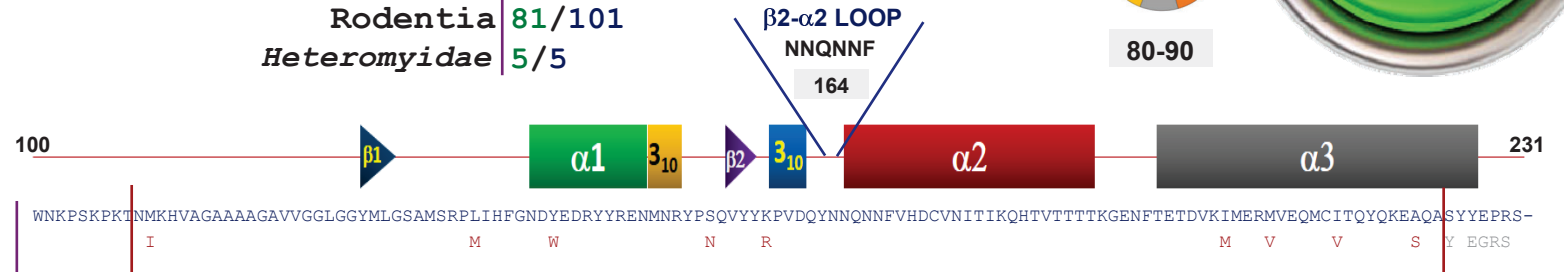

PrP sequence differs by 9 amino acids from the bank vole PrP (see in red)

- No deletions
- No insertions
- No polymorphic variants found

Distinct primary sequence across species

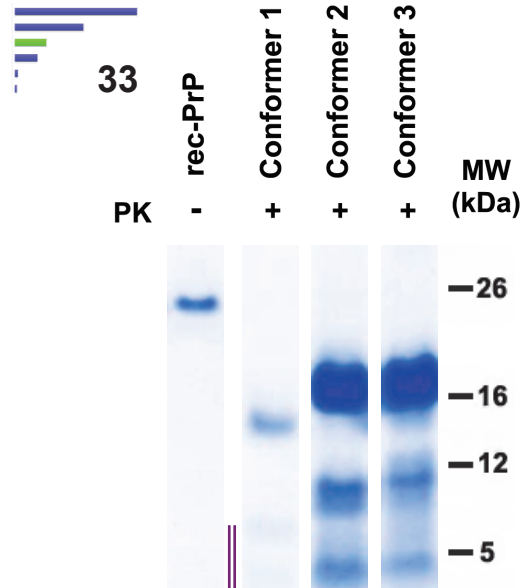

219 AA

3 Conformers

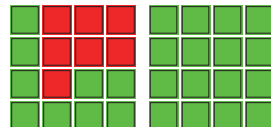

Tm<sup>Exp</sup>: ND

ΔΔG: 2.83

### In vitro studies

- TgVole (1x) Not tested
- Ord's kangaroo rat Not tested

### In vivo studies

- TgVole (1x) Not tested
- Ord's kangaroo rat Not tested

pLDDT [86.28]

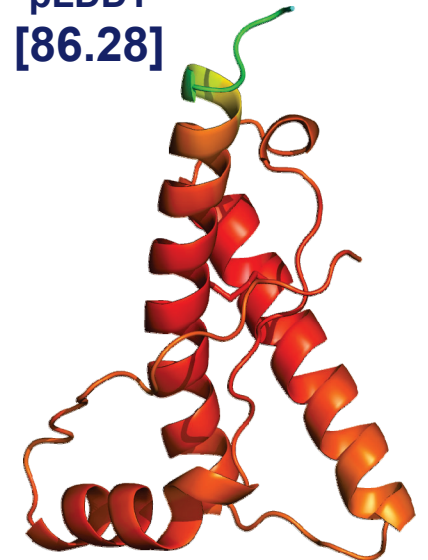

Distinct primary sequence across species

# Banner-tailed kangaroo rat

GenBank: **BK064155**

*Dipodomys spectabilis*

Rodentia **81/101**  
Heteromyidae **5/5**

**P67%**

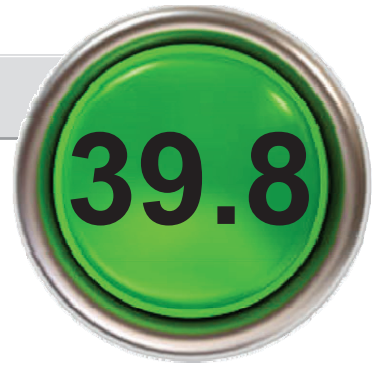

30-40

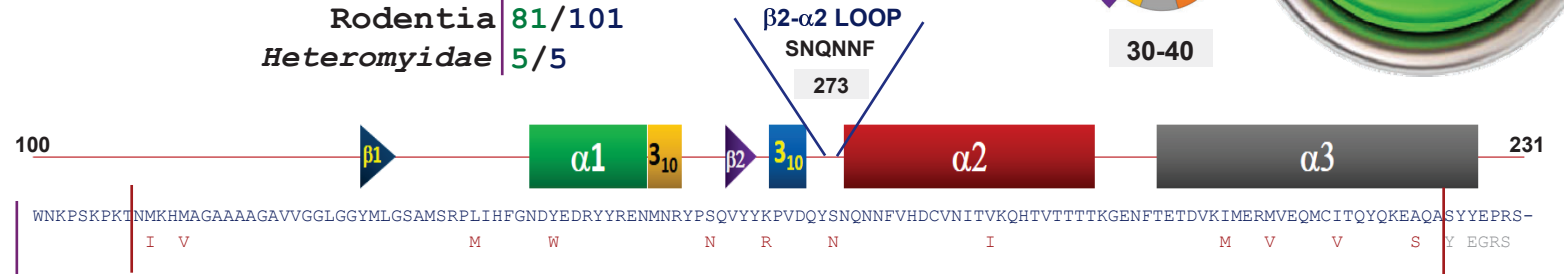

PrP sequence differs by 12 amino acids from the bank vole PrP (see in red)

No deletions  
No insertions  
No polymorphic variants found

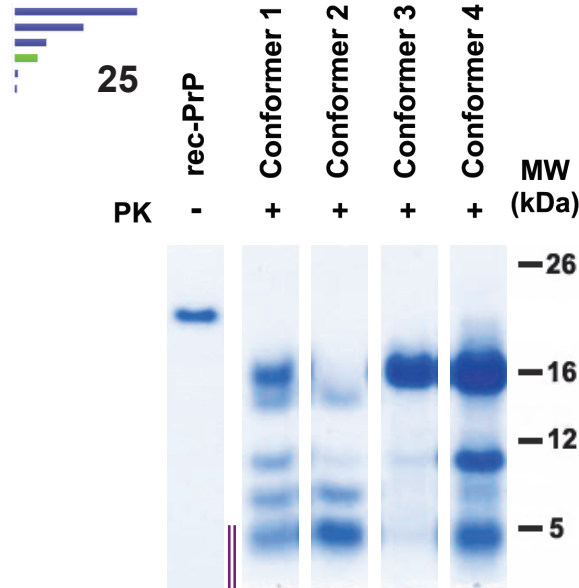

219 AA

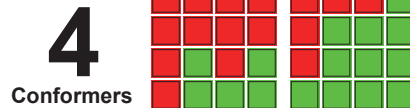

$T_m^{Exp}$ : ND  
 $\Delta\Delta G$ : **-8.72**

### *In vitro* studies

TgVole (1x) Not tested  
Banner-tailed kangaroo rat Not tested

### *In vivo* studies

TgVole (1x) Not tested  
Banner-tailed kangaroo rat Not tested

pLDDT  
[86.11]

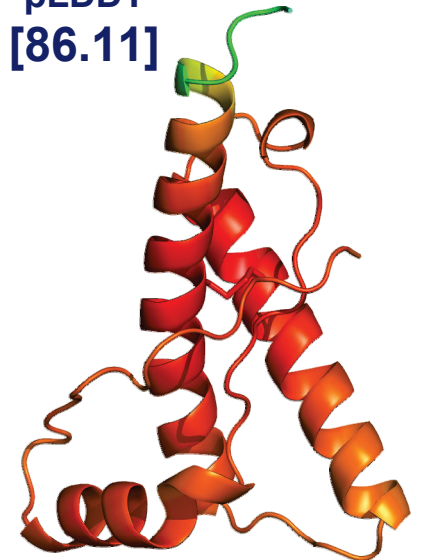

Distinct primary sequence across species

# Stephens' kangaroo rat

GenBank: **BK064064**

P100%

100

## *Dipodomys stephensi*

Rodentia 81/101  
Heteromyidae 5/5

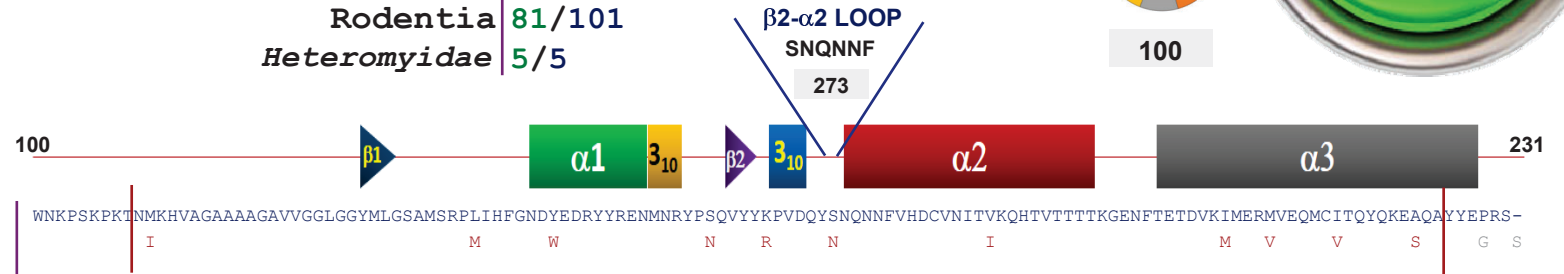

PrP sequence differs by 11 amino acids from the bank vole PrP (see in red)

No deletions  
No insertions  
No polymorphic variants found

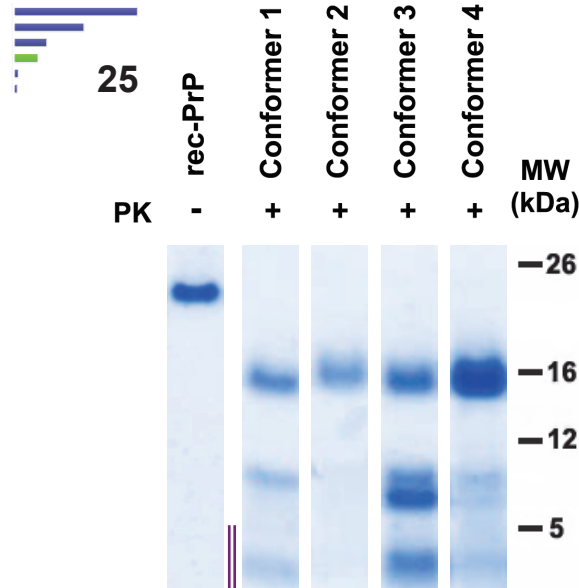

218 AA

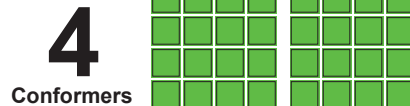

Tm<sup>Exp</sup>: ND  
ΔΔG: ND

### *In vitro* studies

TgVole (1x) Not tested  
Stephens' kangaroo rat Not tested

### *In vivo* studies

TgVole (1x) Not tested  
Stephens' kangaroo rat Not tested

pLDDT [86.16]

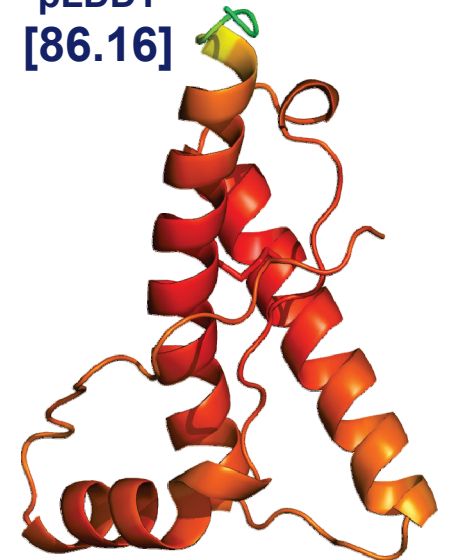

# Patagonian mara

GenBank: KM357833

P29%



0

## Dolichotis patagonum

Rodentia 81/101  
Caviidae 1/5

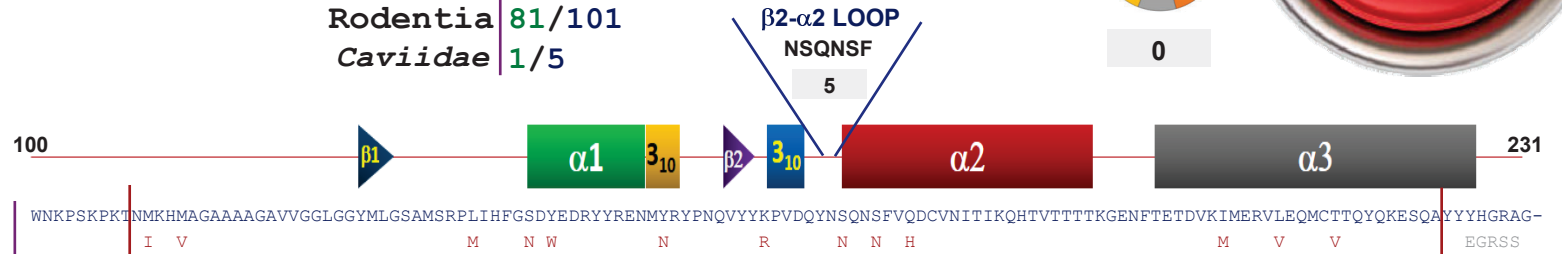

PrP sequence differs by 13 amino acids from the bank vole PrP (see in red)

No deletions  
No insertions  
No polymorphic variants found

Tm<sup>Exp</sup>: ND

ΔΔG: ND

Distinct primary sequence across species

PK - rec-PrP

MW (kDa)

—26

—16

—12

—5

202 AA

0

Conformers

NO MISFOLDING

*In vitro* studies

NOT APPLICABLE

*In vivo* studies

NOT APPLICABLE

pLDDT [84.68]

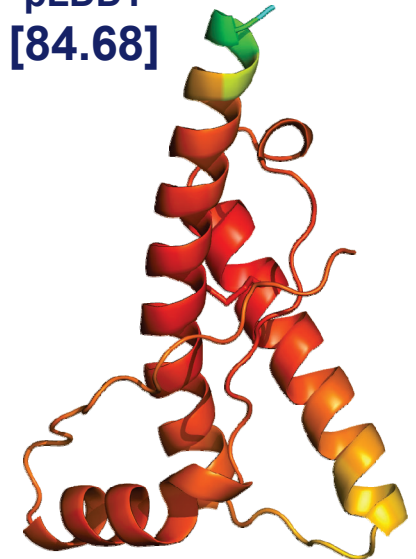

# Transcaucasian mole vole

GenBank: **BK064014**

P100%

100



100

## *Ellobius lutescens*

Rodentia 81/101  
Cricetidae 25/27

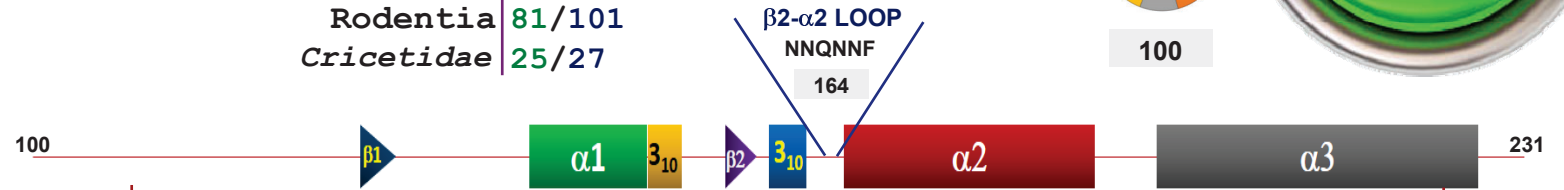

WNKPSKPKTINMKHVAGAAAAGAVVGGGLGGYMLGSAMSRPMIHFGNDWEDRYRENMNRYPNQVYYRPVDQYNNQNNFVHDCVNIITIKQHTVTTTTTKGENFTETDVKMMERVVEQMCVTQYQKESQAYYEGRSS-

PrP sequence differs by 1 amino acids from the bank vole PrP (see in red)

No deletions  
No insertions  
No polymorphic variants found

Distinct primary sequence across species

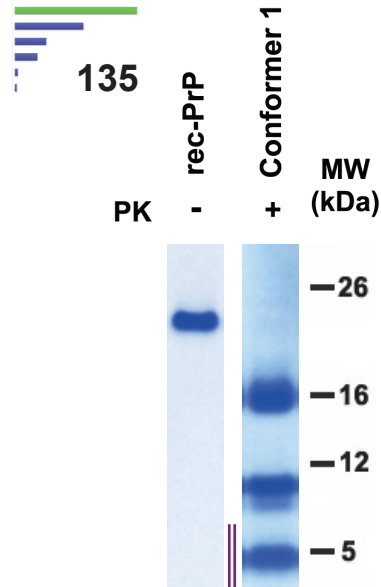

202 AA

1

Conformers



Tm<sup>Exp</sup>: ND

ΔΔG: 6.65

### *In vitro* studies

TgVole (1x) Not tested  
Transcaucasian mole vole Not tested

### *In vivo* studies

TgVole (1x) Not tested  
Transcaucasian mole vole Not tested

pLDDT [85.48]

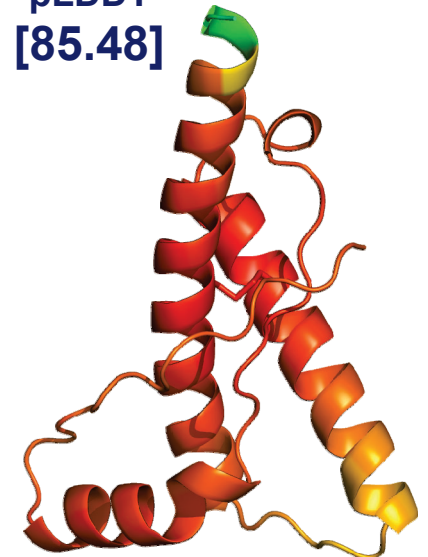

# Northern mole vole

GenBank: **BK064040**

P100%

100



100

## *Ellobius talpinus*

Rodentia 81/101  
Cricetidae 25/27

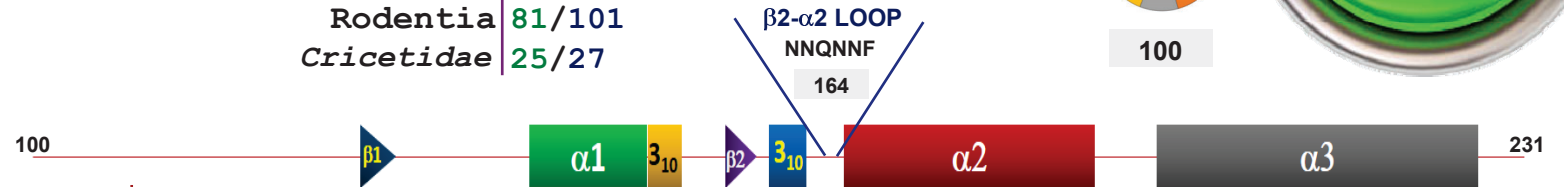

WNKPSKPKTINMKHVAGAAAAGAVVGGGLGGYMLGSAMSRPMIHFGNDWEDRYRENMNRYPNQVYYRPVDQYNNQNNFVHDCVNIITIKQHTVTTTTTKGENFTETDVKMMERVVEQMCVTQYQKESQAYYEGRSS-

PrP sequence differs by 1 amino acids from the bank vole PrP (see in red)

No deletions  
No insertions  
No polymorphic variants found

Distinct primary sequence across species

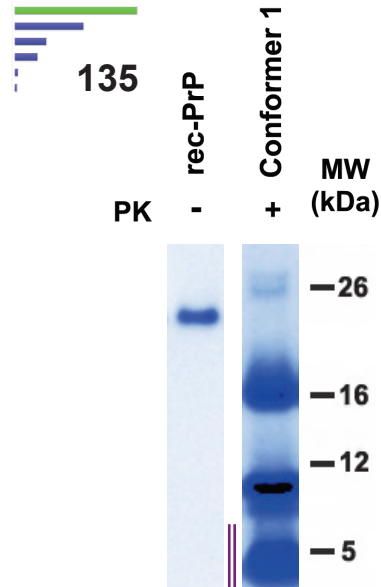

210 AA

1  
Conformers



Tm<sup>Exp</sup>: ND

ΔΔG: 3.73

### *In vitro* studies

TgVole (1x) Not tested

Northern mole vole Not tested

### *In vivo* studies

TgVole (1x) Not tested

Northern mole vole Not tested

pLDDT  
[85.45]

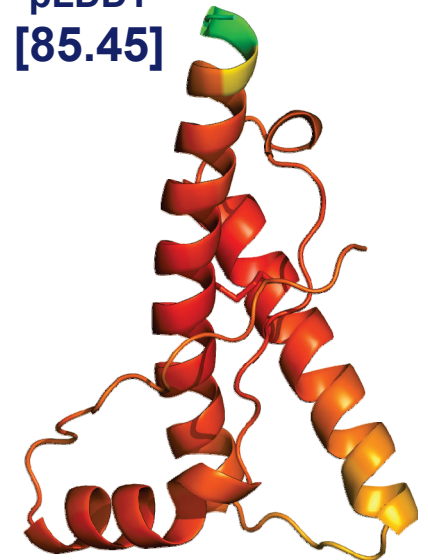

Distinct primary sequence across species

# Chinese zokor

GenBank: **BK064949**

*Eospalax fontanierii*

Rodentia **81/101**  
Spalacidae **3/3**

P78%

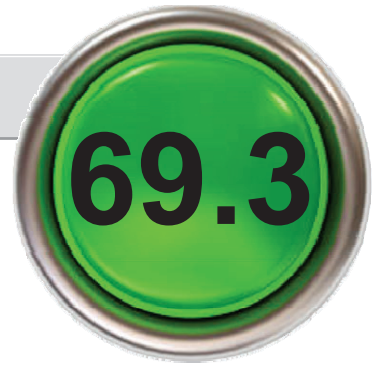

60-70

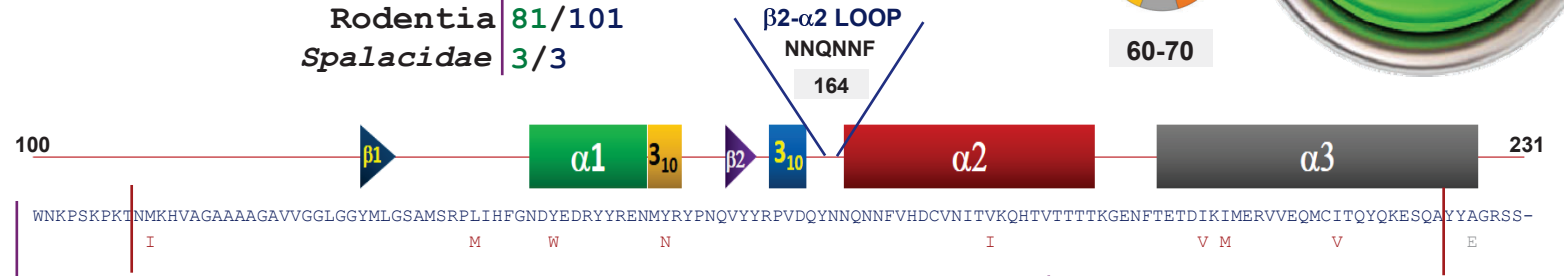

PrP sequence differs by 8 amino acids from the bank vole PrP (see in red)

- No deletions
- No insertions
- No polymorphic variants found

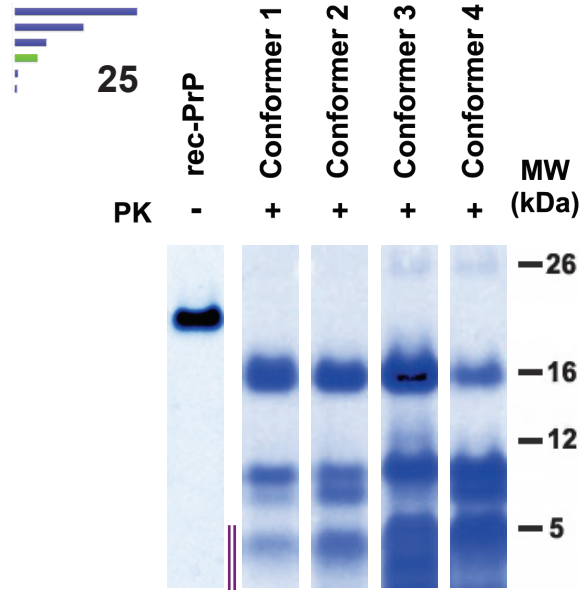

203 AA

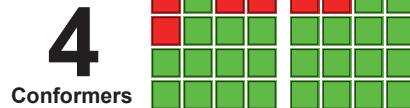

Tm<sup>Exp</sup>: ND  
 $\Delta\Delta G$ : -3.33

### In vitro studies

- TgVole (1x) Not tested
- Chinese zokor Not tested

### In vivo studies

- TgVole (1x) Not tested
- Chinese zokor Not tested

pLDDT [85.59]

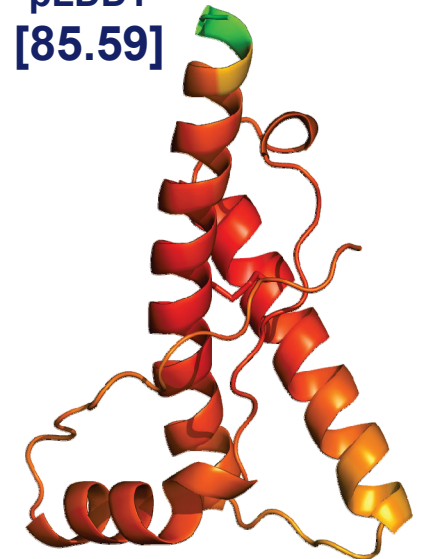

# North American porcupine

GenBank: **BK063957**

P29%



0

## *Erethizon dorsata*

Rodentia 81/101

*Erethizontidae* 0/2

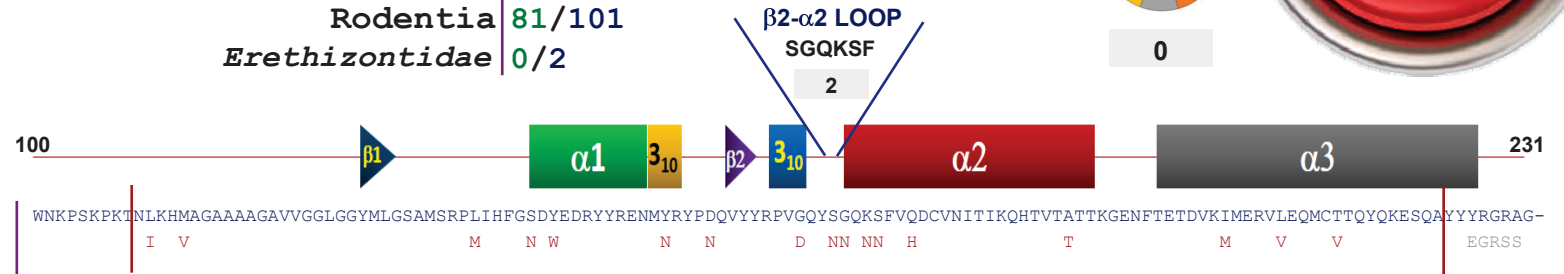

PrP sequence differs by 17 amino acids from the bank vole PrP (see in red)

- No deletions
- No insertions
- No polymorphic variants found

Tm<sup>Exp</sup>: ND

ΔΔG: ND

Distinct primary sequence across species

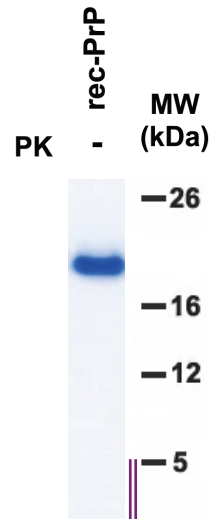

202 AA

0  
Conformers

**NO  
MISFOLDING**

 *In vitro* studies

**NOT  
APPLICABLE**

 *In vivo* studies

**NOT  
APPLICABLE**

pLDDT  
[85.98]

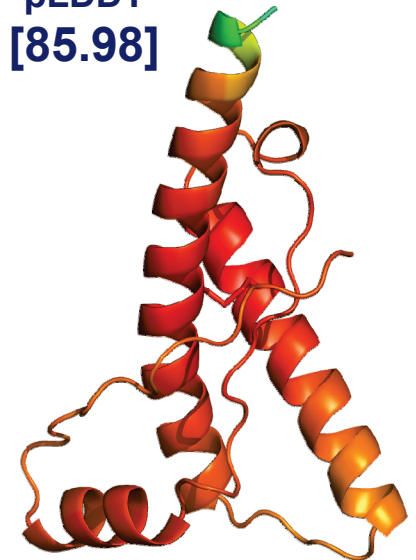



# Southern flying squirrel

GenBank: **BK064183**

P85%

78.9



70-80

## *Glaucomys volans*

Rodentia 81/101  
Sciuridae 7/13

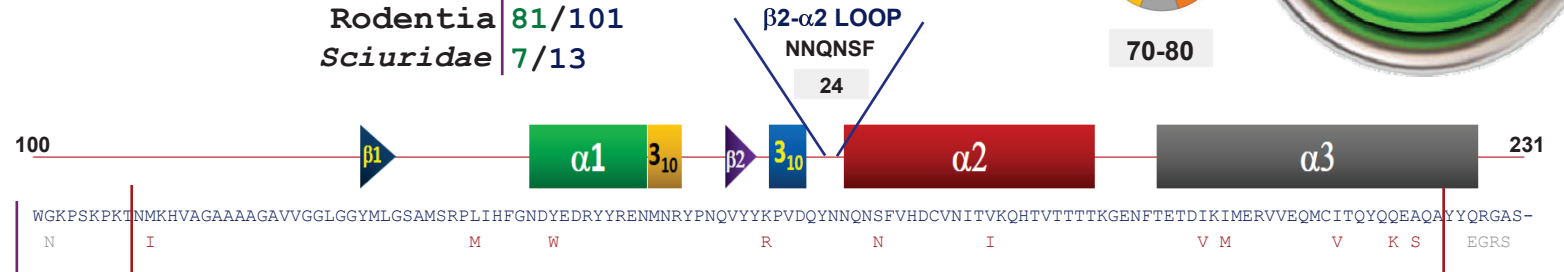

PrP sequence differs by 11 amino acids from the bank vole PrP (see in red)

No deletions  
No insertions  
No polymorphic variants found

Distinct primary sequence across species

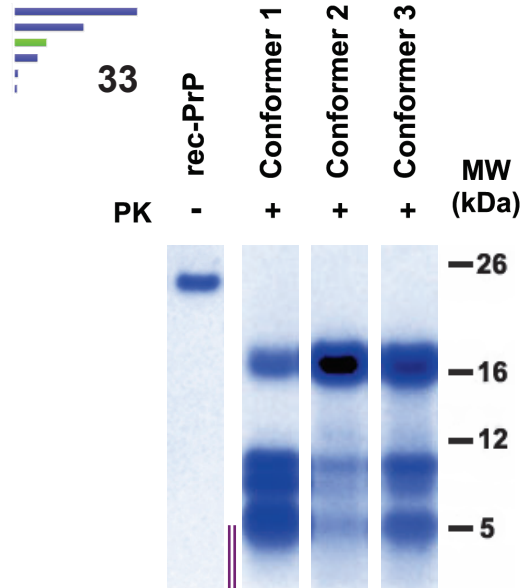

221 AA

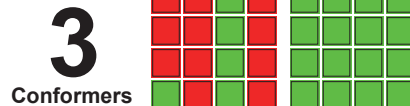

Tm<sup>Exp</sup>: ND  
ΔΔG: -8.59

### *In vitro* studies

TgVole (1x) Not tested  
Southern flying squirrel Not tested

### *In vivo* studies

TgVole (1x) Not tested  
Southern flying squirrel Not tested

pLDDT [84.98]

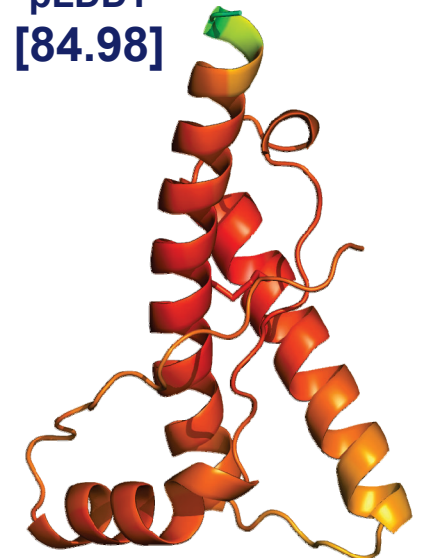

# Edible dormouse

GenBank: **BK064048**

P76%

64.3



60-70

## Glis glis

Rodentia 81/101  
Gliridae 3/3

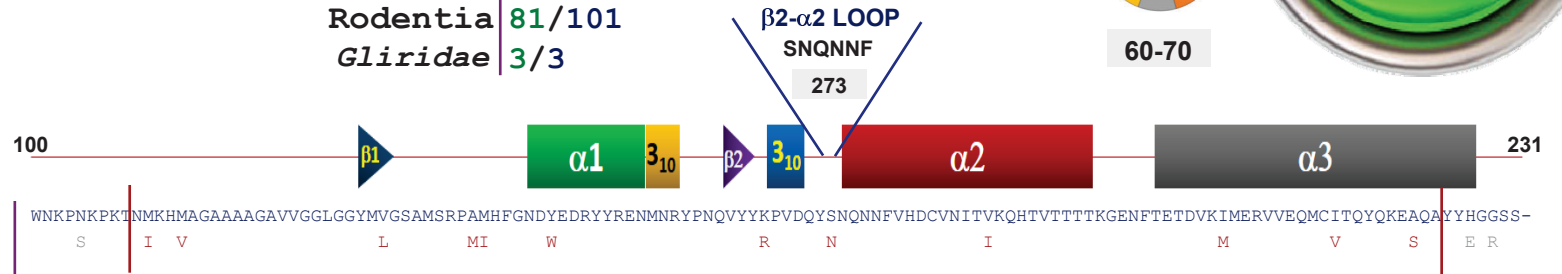

PrP sequence differs by 12 amino acids from the bank vole PrP (see in red)

No deletions  
No insertions  
No polymorphic variants found

Distinct primary sequence across species

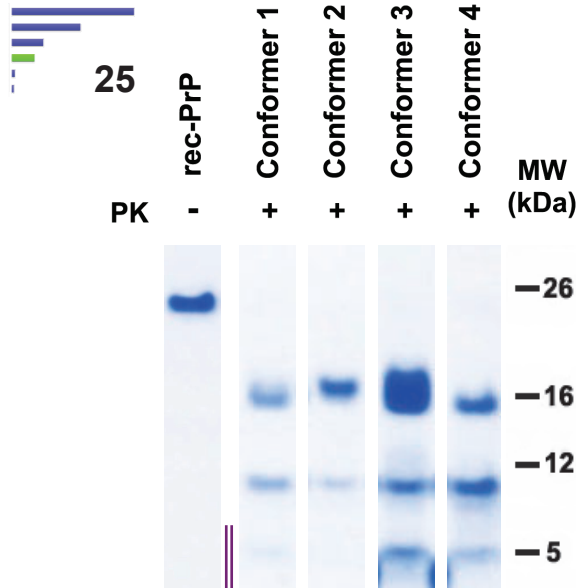

218 AA

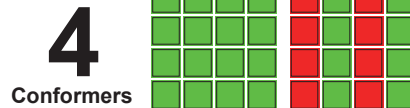

Tm<sup>Exp</sup>: ND  
ΔΔG: -2.93

### In vitro studies

TgVole (1x) Not tested  
Edible dormouse Not tested

### In vivo studies

TgVole (1x) Not tested  
Edible dormouse Not tested

pLDDT [84.73]

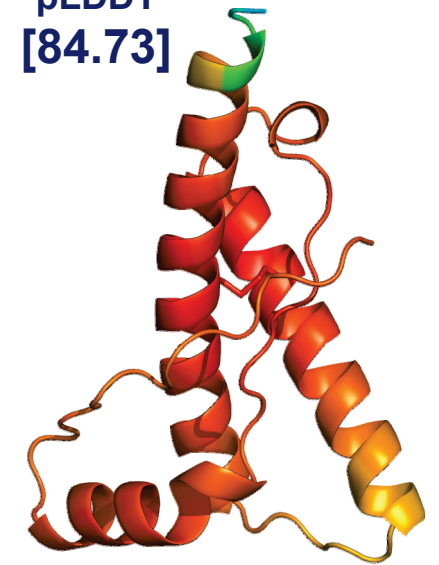

# African woodland thicket rat

GenBank: XM\_028757107

P86%

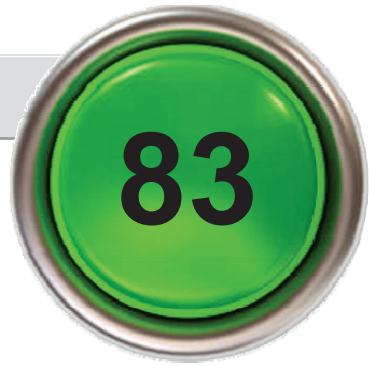

80-90

## Grammomys surdaster

Rodentia 81/101  
Muridae 16/18

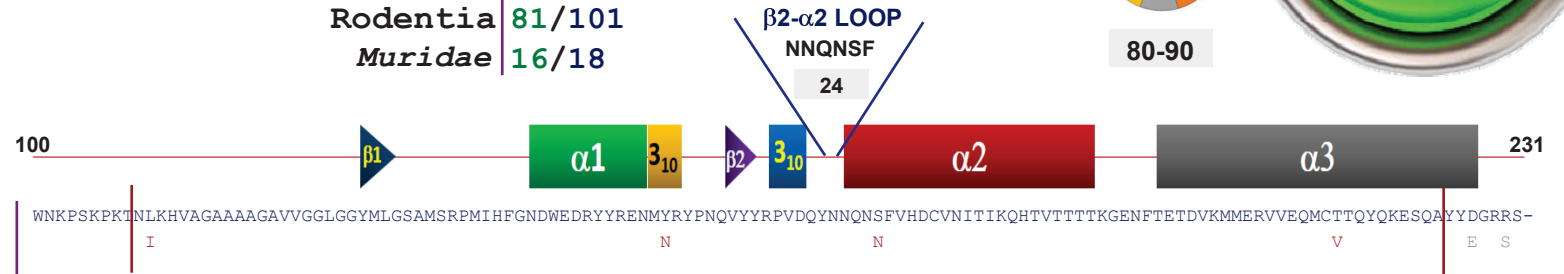

PrP sequence differs by 4 amino acids from the bank vole PrP (see in red)

No deletions  
No insertions  
No polymorphic variants found

Distinct primary sequence across species

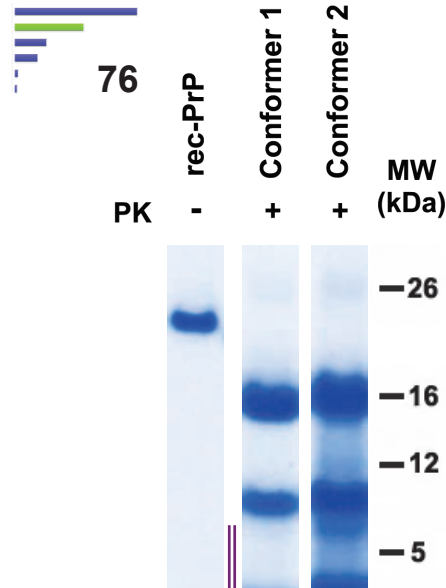

211 AA

2  
Conformers

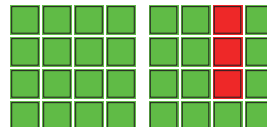

Tm<sup>Exp</sup>: ND

ΔΔG: -3.65

### In vitro studies

TgVole (1x) Not tested

African woodland thicket rat Not tested

### In vivo studies

TgVole (1x) Not tested

African woodland thicket rat Not tested

pLDDT [86.17]

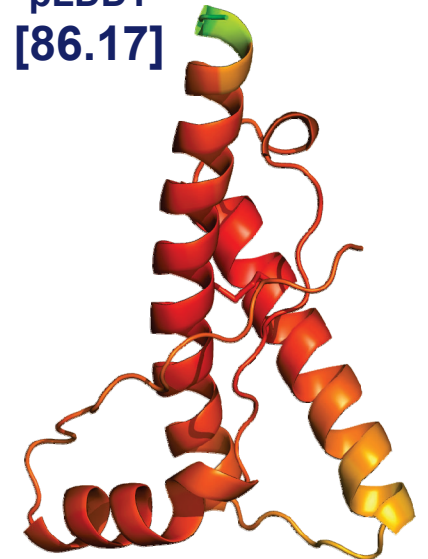

# Woodland dormouse

GenBank: **BK064049**

P47%

11.4

## *Graphiurus murinus*

Rodentia 81/101  
Gliridae 3/3

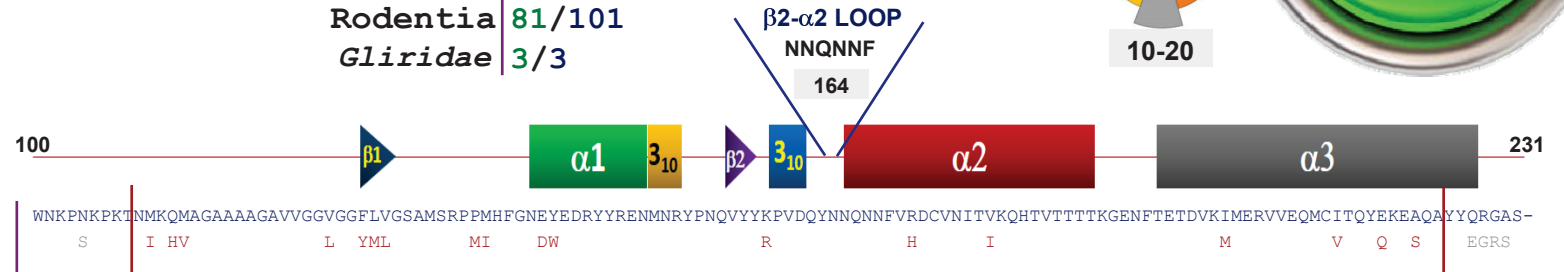

PrP sequence differs by 18 amino acids from the bank vole PrP (see in red)

No deletions  
No insertions  
No polymorphic variants found

Distinct primary sequence across species

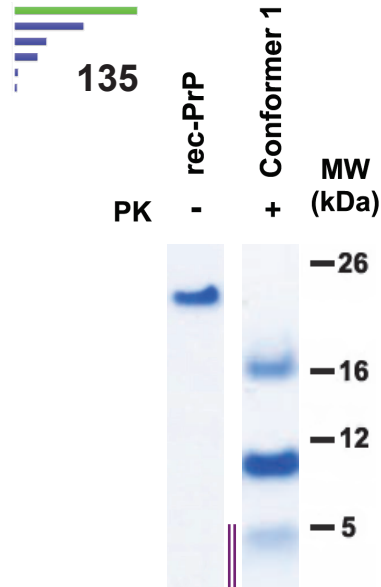

223 AA

1  
Conformers

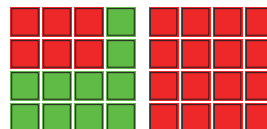

$T_m^{Exp}$ : ND

$\Delta\Delta G$ : -7.47

### *In vitro* studies

TgVole (1x) Not tested

Woodland dormouse Not tested

### *In vivo* studies

TgVole (1x) Not tested

Woodland dormouse Not tested

pLDDT  
[84.68]

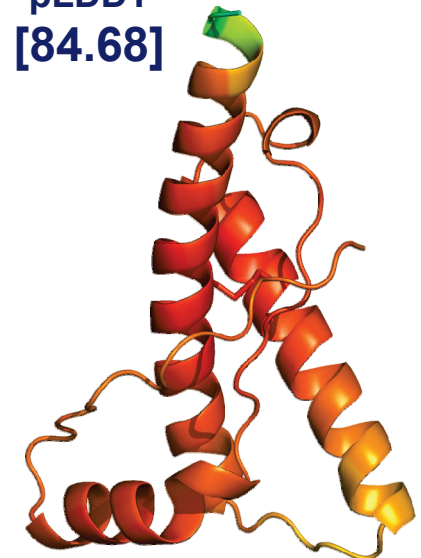

# Naked mole-rat

GenBank: XM\_004840771

P29%

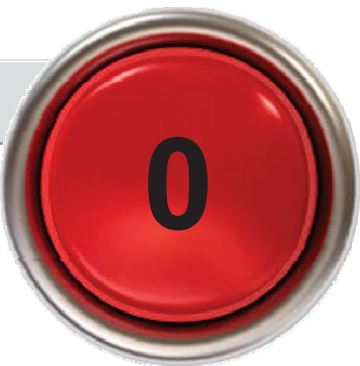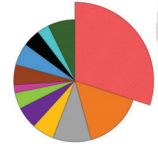

0

## Heterocephalus glaber

Rodentia 81/101  
Bathyergidae 2/3

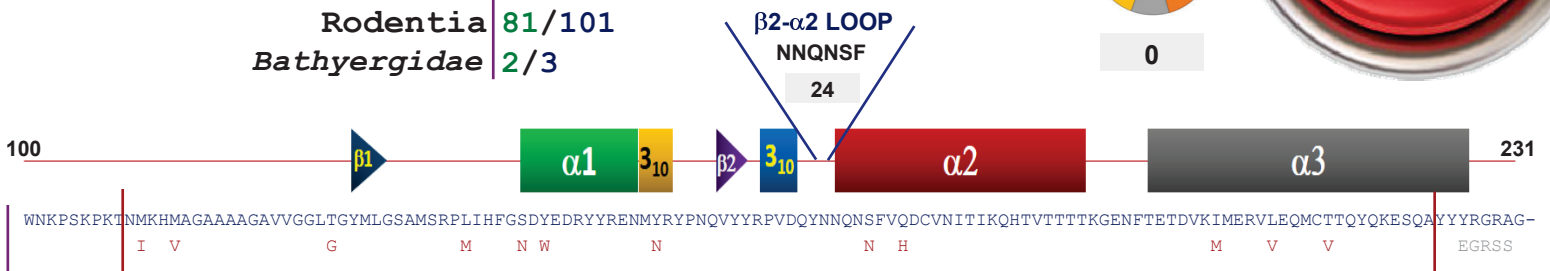

PrP sequence differs by 12 amino acids from the bank vole PrP (see in red)

- No deletions
- No insertions
- No polymorphic variants found

Tm<sup>Exp</sup>: ND

ΔΔG: ND

Distinct primary sequence across species

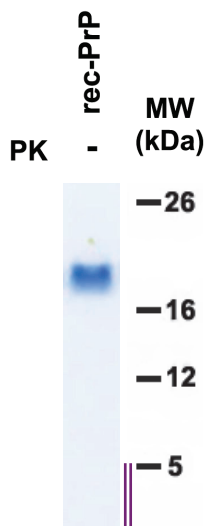

202 AA

0 Conformers

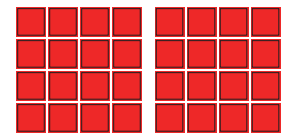

**NO MISFOLDING**

*In vitro* studies

**NOT APPLICABLE**

*In vivo* studies

**NOT APPLICABLE**

pLDDT [85.44]

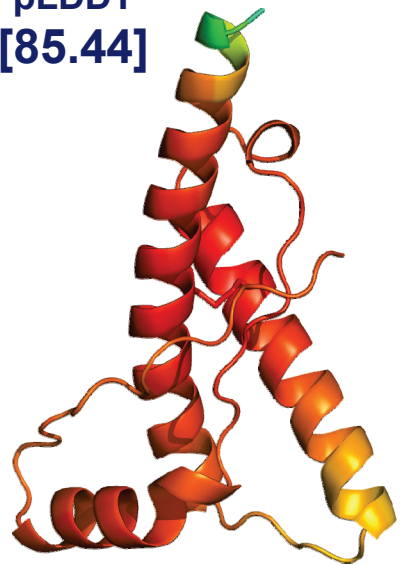

# Capybara

GenBank: KM357831

P29%



0

## Hydrochoerus hydrochaeris

Rodentia 81/101  
Caviidae 1/5

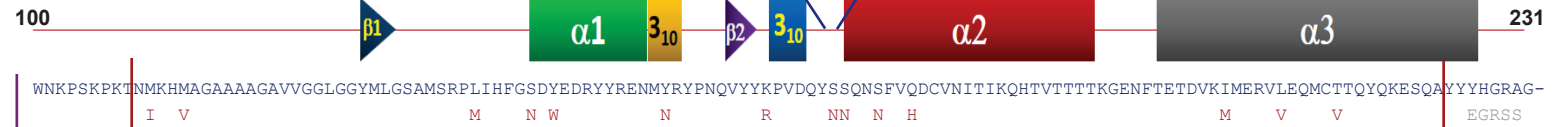

PrP sequence differs by 14 amino acids from the bank vole PrP (see in red)

No deletions  
No insertions  
No polymorphic variants found

Tm<sup>Exp</sup>: ND

ΔΔG: ND

1 species sharing the same primary sequence

Rock cavy  
*Kerodon rupestris*

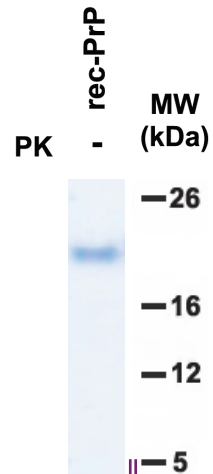

202 AA

0  
Conformers

NO  
MISFOLDING

*In vitro* studies

NOT  
APPLICABLE

*In vivo* studies

NOT  
APPLICABLE

pLDDT  
[84.32]

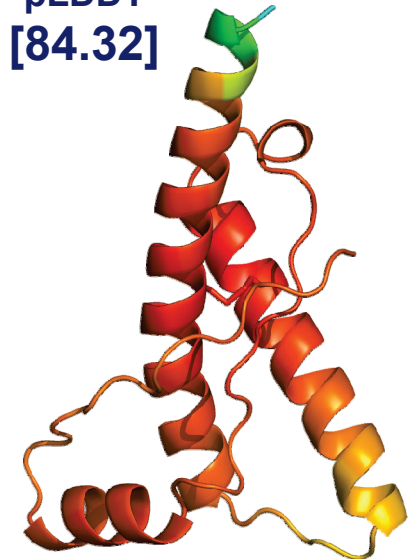

# Allen's wood mouse

GenBank: **BK064167**

P67%

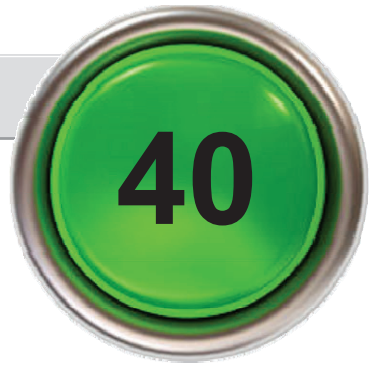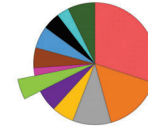

40-50

## *Hylomyscus alleni*

Rodentia 81/101  
Muridae 16/18

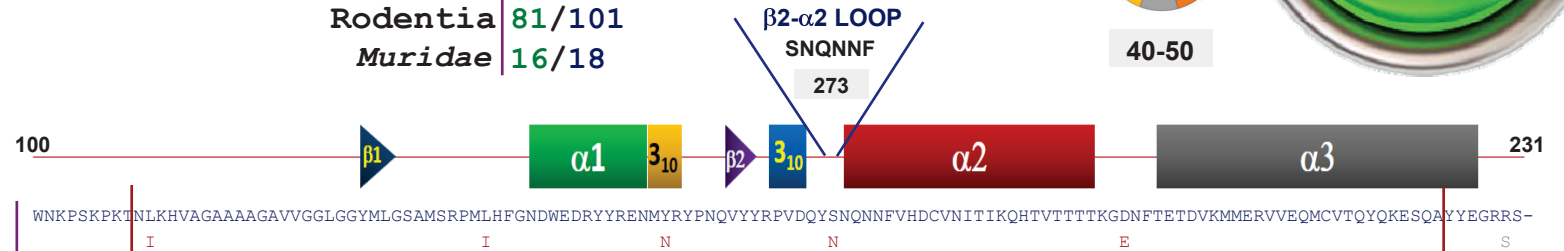

PrP sequence differs by 5 amino acids from the bank vole PrP (see in red)

No deletions  
No insertions  
No polymorphic variants found

Distinct primary sequence across species

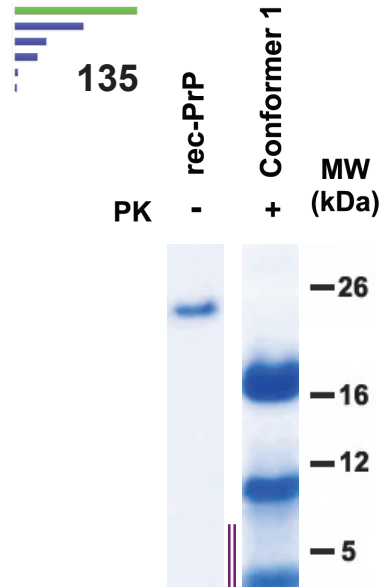

211 AA

**1**  
Conformers

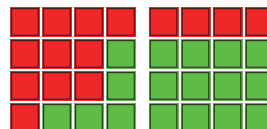

Tm<sup>Exp</sup>: ND

ΔΔG: **-10.63**

### *In vitro* studies

TgVole (1x) Not tested

Allen's wood mouse Not tested

### *In vivo* studies

TgVole (1x) Not tested

Allen's wood mouse Not tested

pLDDT  
[85.87]

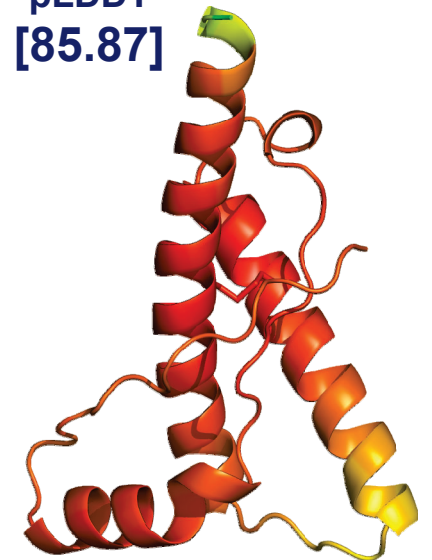

# Malayan porcupine

GenBank: **BK063933**

P29%



0

## *Hystrix brachyura*

Rodentia 81/101  
*Hystriidae* 0/1

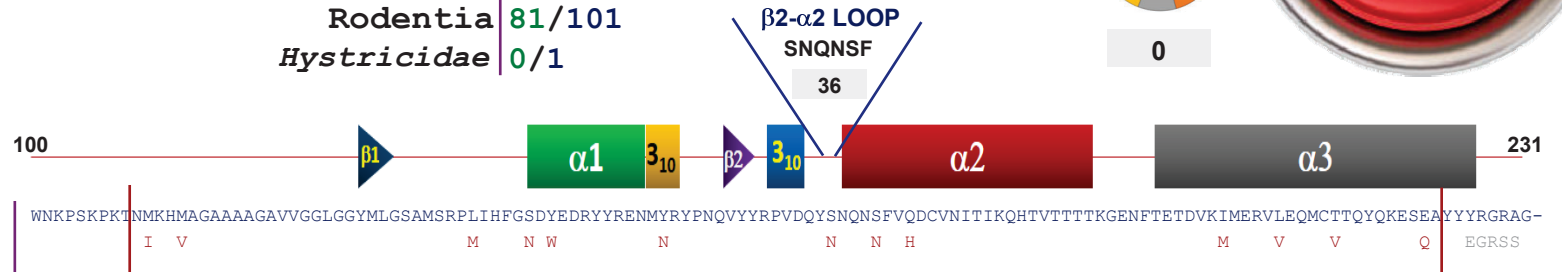

PrP sequence differs by 13 amino acids from the bank vole PrP (see in red)

No deletions  
No insertions  
No polymorphic variants found

T<sub>m</sub><sup>Exp</sup>: ND  
ΔΔG: ND

1 species sharing the same primary sequence

Crested porcupine  
*Hystrix cristata*

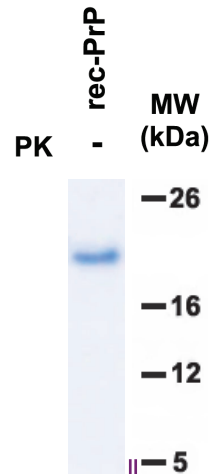

202 AA

0  
Conformers

**NO MISFOLDING**

*In vitro* studies

**NOT APPLICABLE**

*In vivo* studies

**NOT APPLICABLE**

pLDDT [87.14]

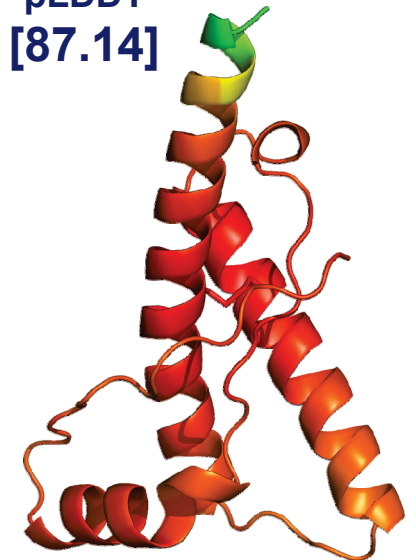



# Lesser Egyptian jerboa

GenBank: **BK064939**

**P59%**

**26.8**

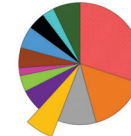

20-30

## *Jaculus jaculus*

Rodentia 81/101  
Dipodidae 3/3

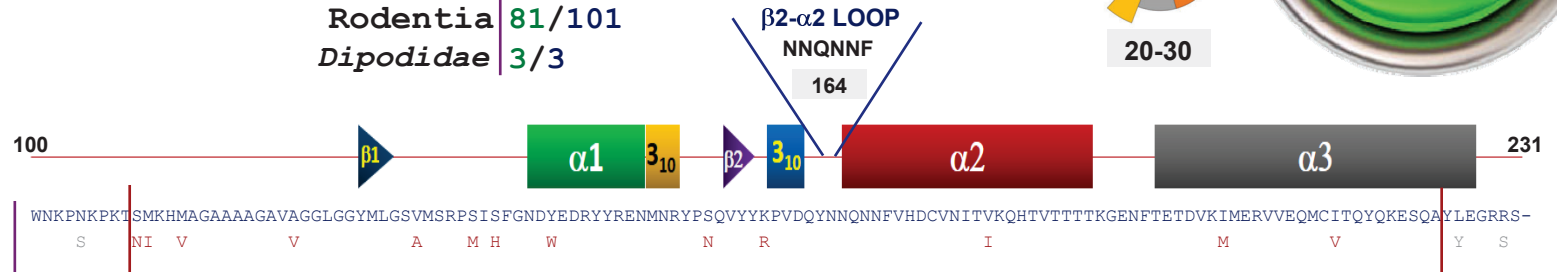

PrP sequence differs by 13 amino acids from the bank vole PrP (see in red)

No deletions  
No insertions  
No polymorphic variants found

Distinct primary sequence across species

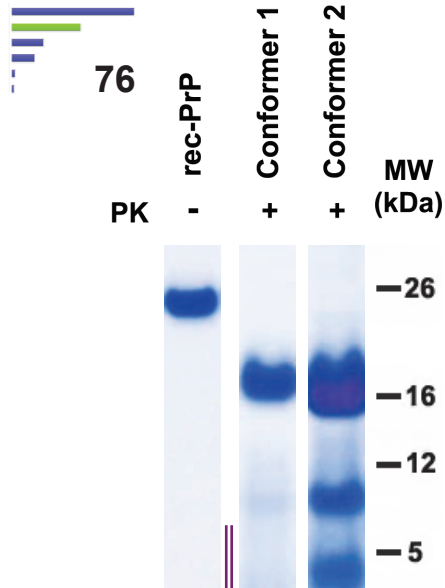

217 AA

**2**  
Conformers

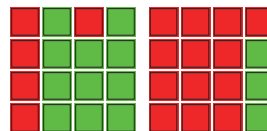

Tm<sup>Exp</sup>: ND

$\Delta\Delta G$ : -14.88

### *In vitro* studies

TgVole (1x) Not tested  
Lesser Egyptian jerboa Not tested

### *In vivo* studies

TgVole (1x) Not tested  
Lesser Egyptian jerboa Not tested

pLDDT  
[88.29]

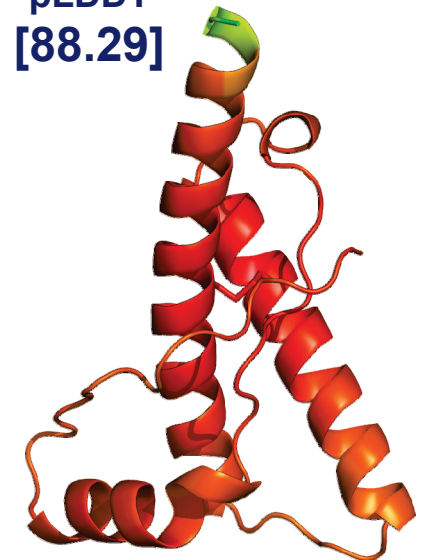

Distinct primary sequence across species

# Maned rat

GenBank: **BK064153**

## *Lophiomys imhausi*

Rodentia **81/101**  
Cricetidae **25/27**

P65%

**36.6**

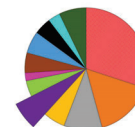

30-40

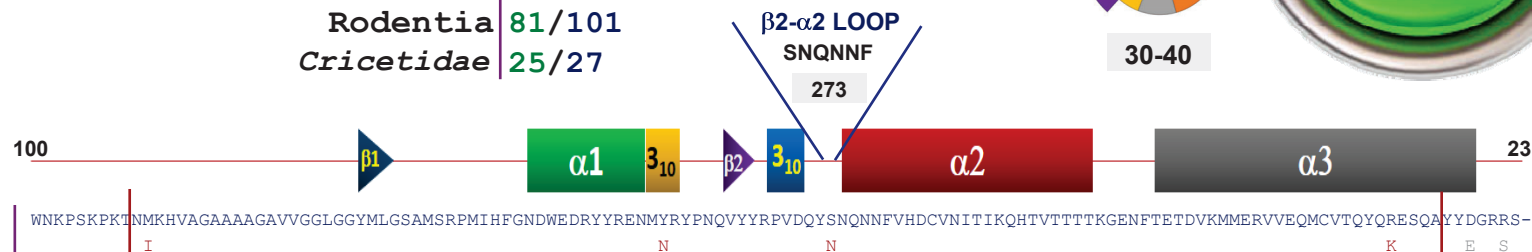

PrP sequence differs by 4 amino acids from the bank vole PrP (see in red)

No deletions  
No insertions  
No polymorphic variants found

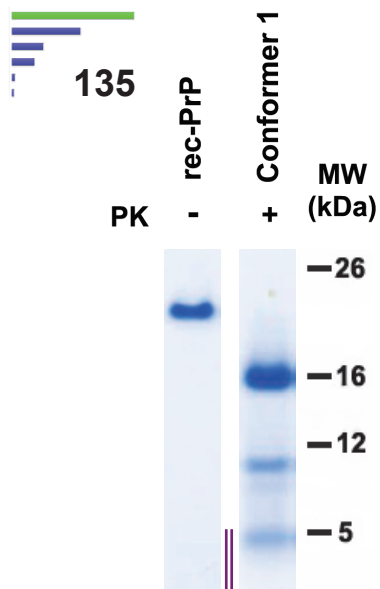

217 AA

**1**  
Conformers

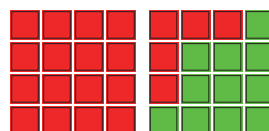

Tm<sup>Exp</sup>: ND

ΔΔG: **-2.47**

### *In vitro* studies

TgVole (1x) Not tested

Maned rat Not tested

### *In vivo* studies

TgVole (1x) Not tested

Maned rat Not tested

pLDDT  
[86.7]

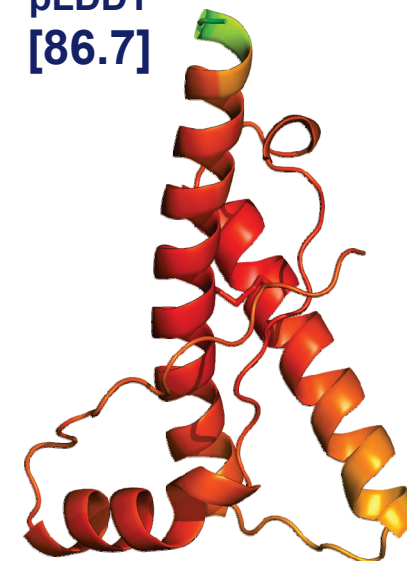

# Yellow-bellied marmot

GenBank: XM\_027955665

P29%



0

## *Marmota flaviventris*

Rodentia 81/101  
Sciuridae 7/13

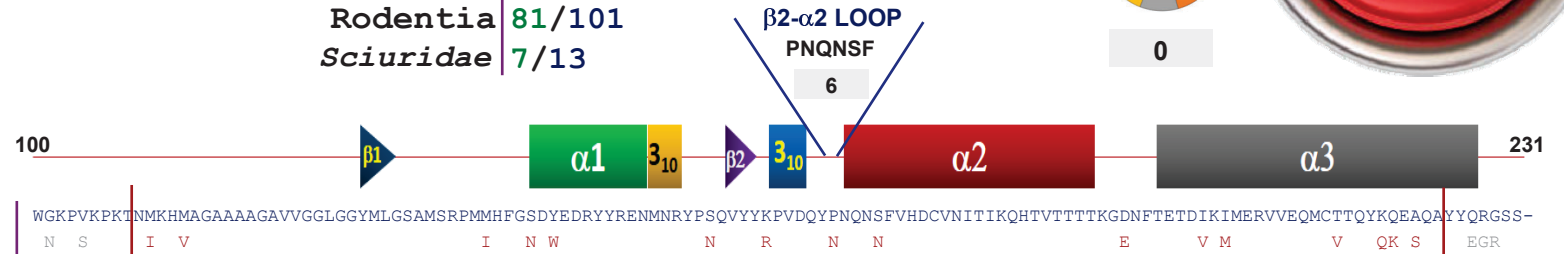

PrP sequence differs by 16 amino acids from the bank vole PrP (see in red)

- No deletions
- No insertions
- No polymorphic variants found

Tm<sup>Exp</sup>: ND

ΔΔG: -10.36

2 species sharing the same primary sequence

Groundhog  
*Marmota monax*

Vancouver Island marmot  
*Marmota vancouverensis*

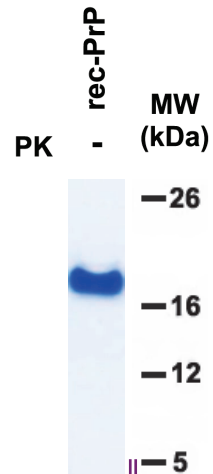

195 AA

0  
Conformers

NO  
MISFOLDING

*In vitro* studies

NOT  
APPLICABLE

*In vivo* studies

NOT  
APPLICABLE

pLDDT  
[86.34]

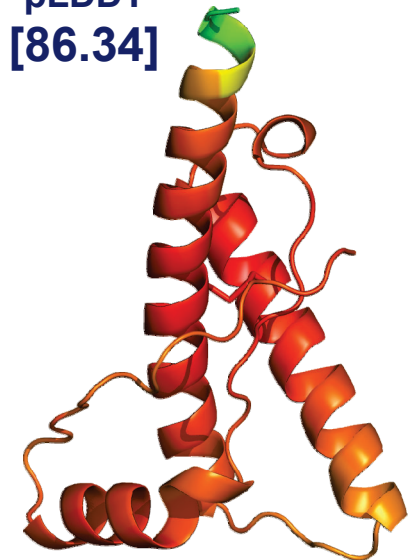

# Alpine marmot

GenBank: XM\_015482632

P29%

0

## Marmota marmota

Rodentia 81/101  
Sciuridae 7/13

$\beta$ 2- $\alpha$ 2 LOOP  
PNQNSF  
6

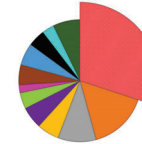

0

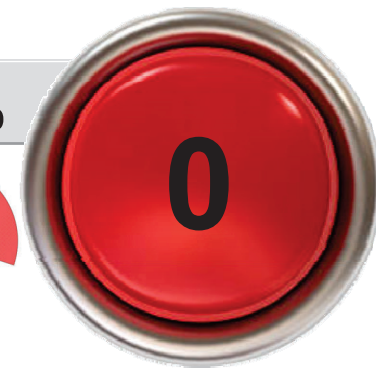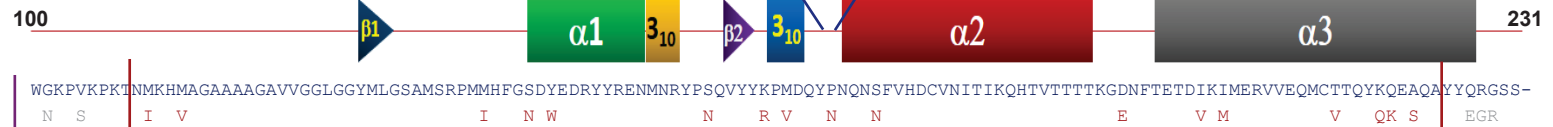

PrP sequence differs by 17 amino acids from the bank vole PrP (see in red)

No deletions  
No insertions  
No polymorphic variants found

Tm<sup>Exp</sup>: ND

$\Delta\Delta G$ : -8.03

1 species sharing the same primary sequence

Himalayan marmot  
*Marmota himalayana*

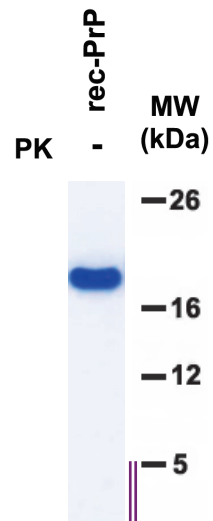

195 AA

0  
Conformers

NO  
MISFOLDING

*In vitro* studies

NOT  
APPLICABLE

*In vivo* studies

NOT  
APPLICABLE

pLDDT  
[86.42]

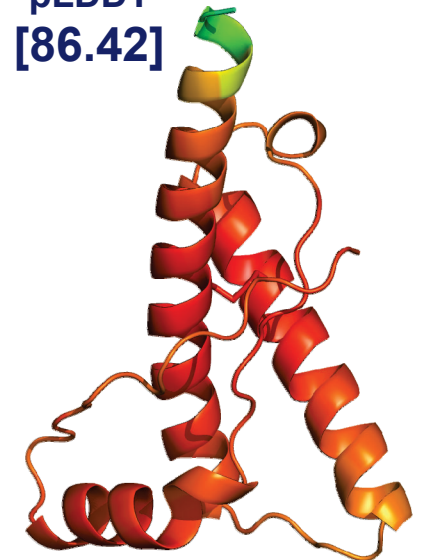

# Southern multimammate mouse

GenBank: XM\_031371966

P82%

74.6



70-80

## *Mastomys coucha*

Rodentia 81/101  
Muridae 16/18

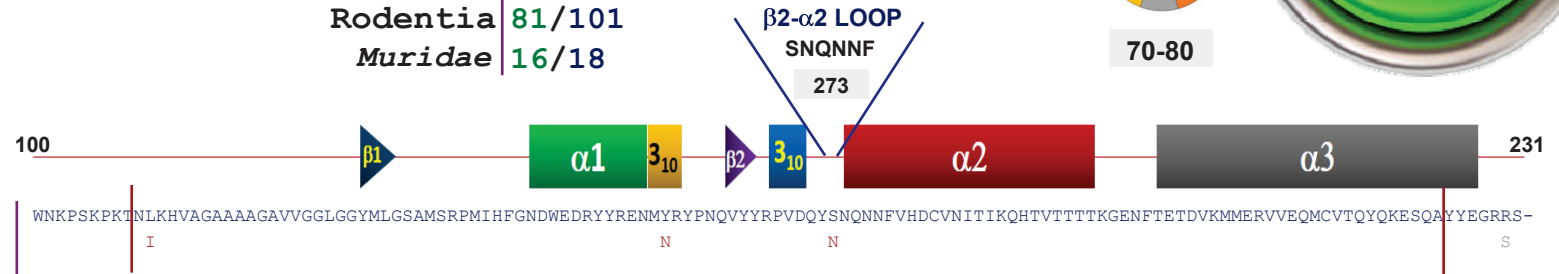

PrP sequence differs by 3 amino acids from the bank vole PrP (see in red)

No deletions  
No insertions  
No polymorphic variants found

4 species sharing the same primary sequence

- Natal multimammate mouse *Mastomys natalensis*
- Muennink's spiny rat *Tokudaia muenninki*
- Ryukyu spiny rat *Tokudaia osimensis*
- Tokunoshima spiny rat *Tokudaia tokunoshimensis*

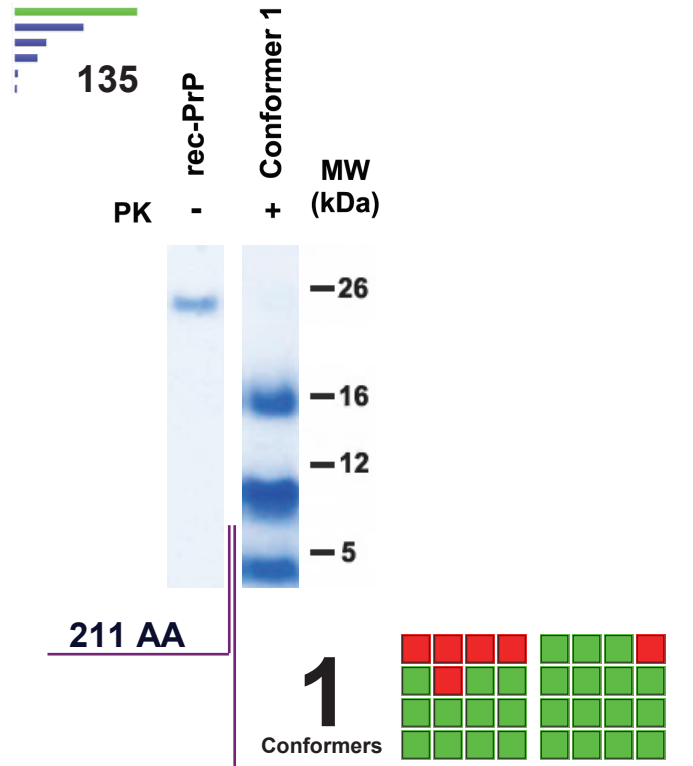

$T_m^{Exp}$ : ND  
 $\Delta\Delta G$ : -6.17

### *In vitro* studies

TgVole (1x) Not tested

Southern multimammate mouse Not tested

### *In vivo* studies

TgVole (1x) Not tested

Southern multimammate mouse Not tested

pLDDT [86.01]

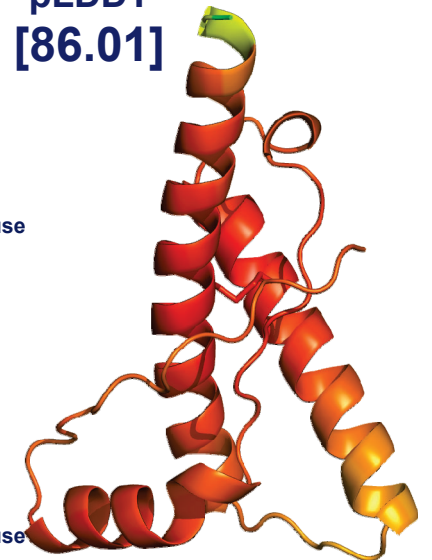

# Red spiny rat

GenBank: KF466947

P100%

100



100

## Maxomys surifer

Rodentia 81/101  
Muridae 16/18

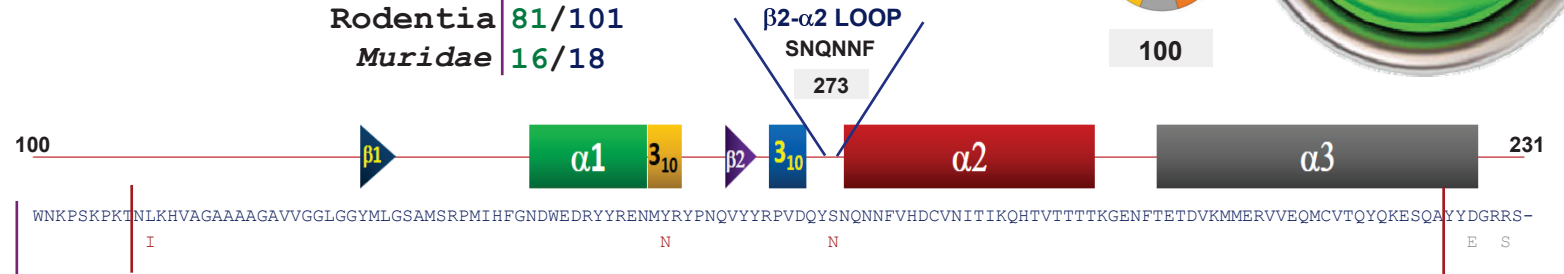

PrP sequence differs by 3 amino acids from the bank vole PrP (see in red)

- No deletions
- No insertions
- No polymorphic variants found

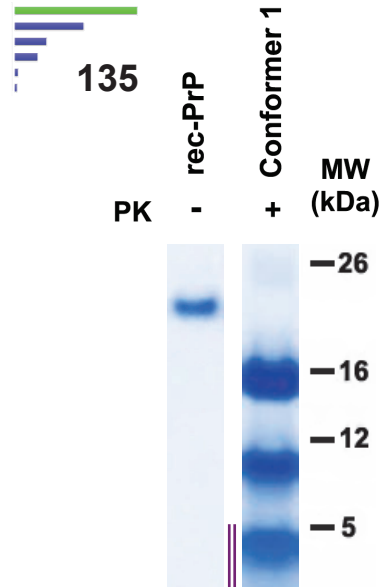

211 AA

1

Conformers



$T_m^{Exp}$ : 67.6 °C

$\Delta\Delta G$ : -0.97

### In vitro studies

TgVole (1x) Not tested

Red spiny rat Not tested

### In vivo studies

TgVole (1x) Not tested

Red spiny rat Not tested

pLDDT [86.22]

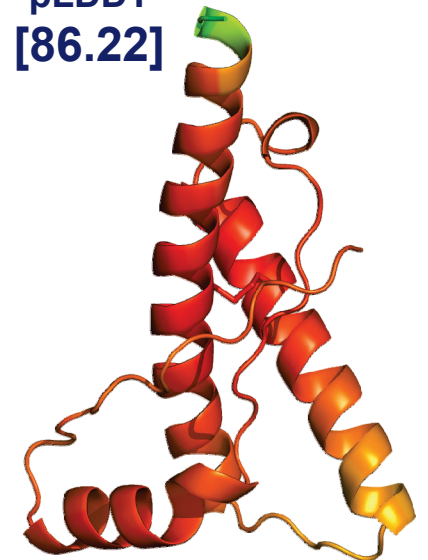

1 species sharing the same primary sequence

Gairdner's shrewmouse  
*Mus pahari*

# Libyan jird

GenBank: **BK064826**

P74%

62.5



60-70

## *Meriones libycus*

Rodentia 81/101  
Muridae 16/18

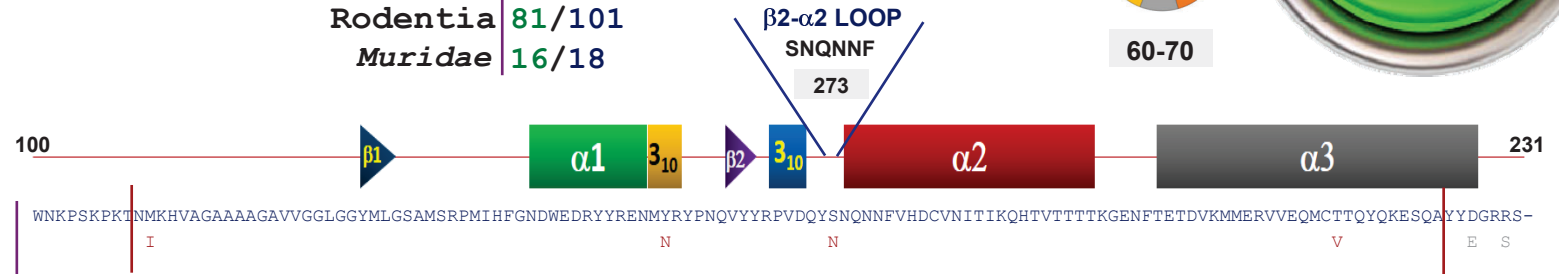

PrP sequence differs by 4 amino acids from the bank vole PrP (see in red)

- No deletions
- No insertions
- No polymorphic variants found

Distinct primary sequence across species

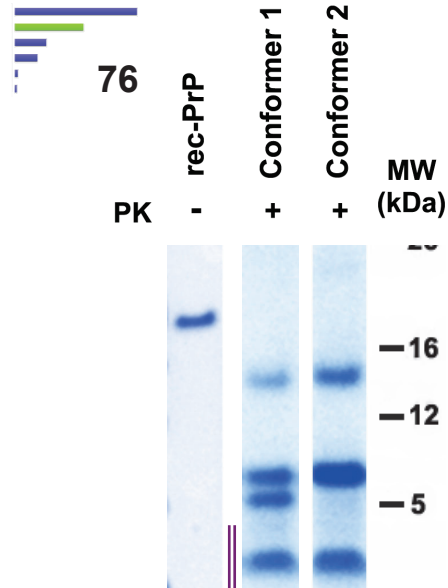

210 AA

2  
Conformers

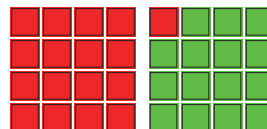

Tm<sup>Exp</sup>: ND

ΔΔG: -15.45

### In vitro studies

- TgVole (1x) Not tested
- Libyan jird Not tested

### In vivo studies

- TgVole (1x) Not tested
- Libyan jird Not tested

pLDDT [93.88]

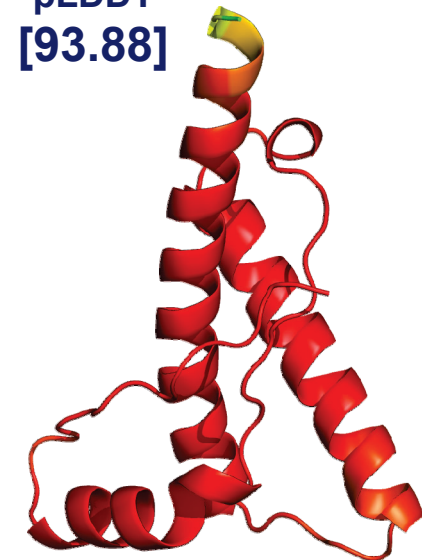

# Mongolian gerbil

GenBank: XM\_021651076

P100%

100



100

## *Meriones unguiculatus*

Rodentia 81/101  
Muridae 16/18

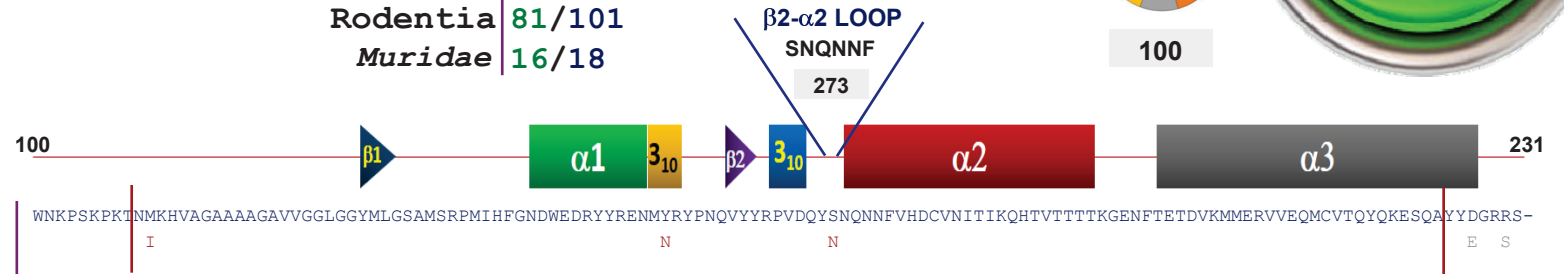

PrP sequence differs by 3 amino acids from the bank vole PrP (see in red)

No deletions  
No insertions  
No polymorphic variants found

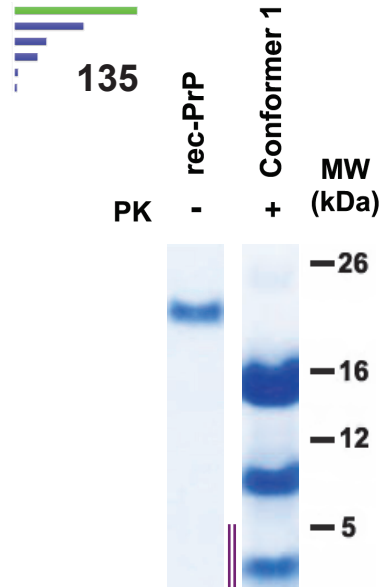

210 AA

1  
Conformers

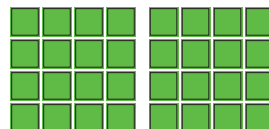

Tm<sup>Exp</sup>: ND

ΔΔG: -3.71

### *In vitro* studies

TgVole (1x) Propagate

Mongolian gerbil Propagate

### *In vivo* studies

TgVole (1x) Infectious

Mongolian gerbil Ongoing

pLDDT [86.89]

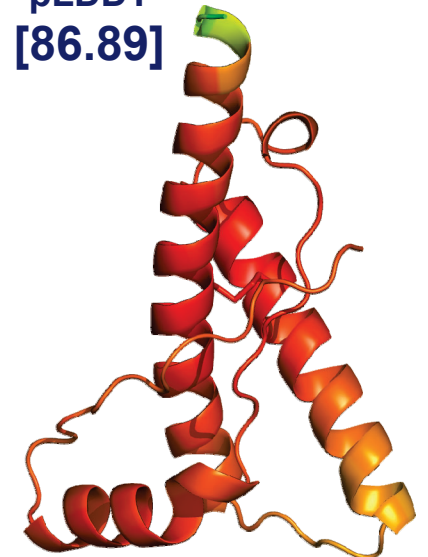

1 species sharing the same primary sequence

Great gerbil  
*Rhombomys opimus*



# Syrian hamster

GenBank: AH001830

P29%

0

## Mesocricetus auratus

Rodentia 81/101  
Cricetidae 25/27

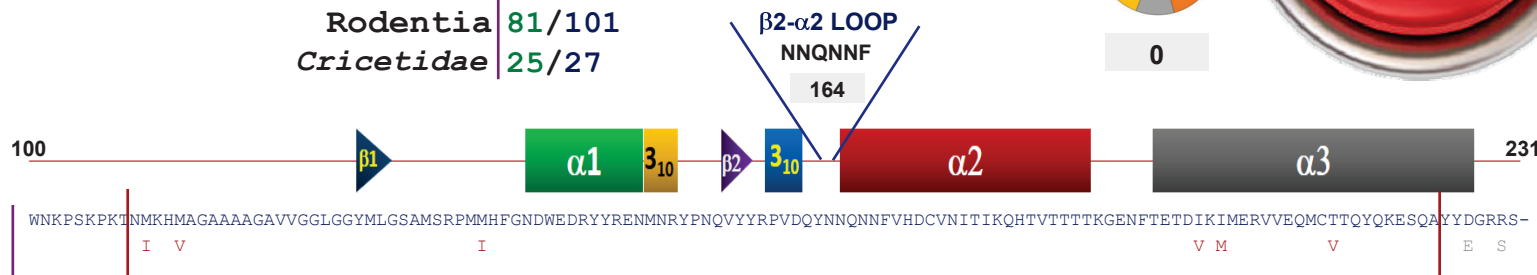

PrP sequence differs by 6 amino acids from the bank vole PrP (see in red)

No deletions  
No insertions  
No polymorphic variants found

Tm<sup>Exp</sup>: ND

ΔΔG: -0.58

1 species sharing the same primary sequence

Turkish hamster  
*Mesocricetus brandti*

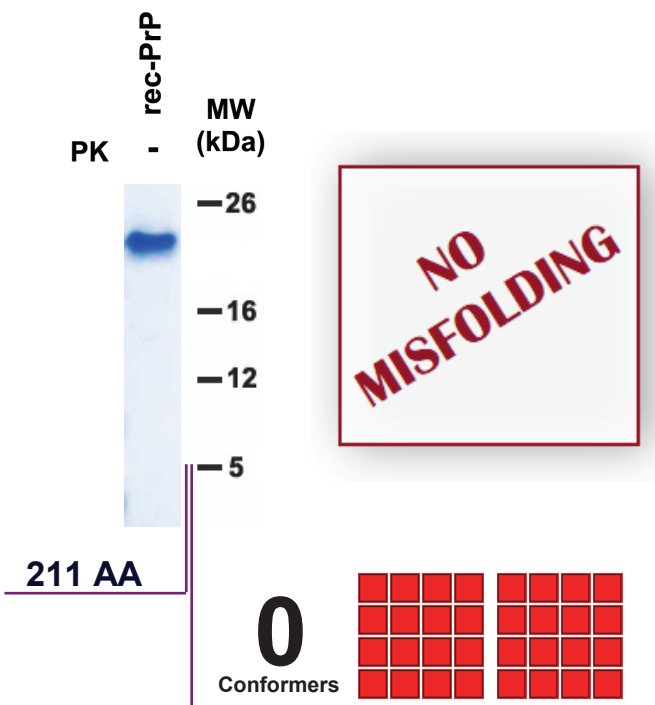

*In vitro* studies

NOT APPLICABLE

*In vivo* studies

NOT APPLICABLE

pLDDT [86.06]

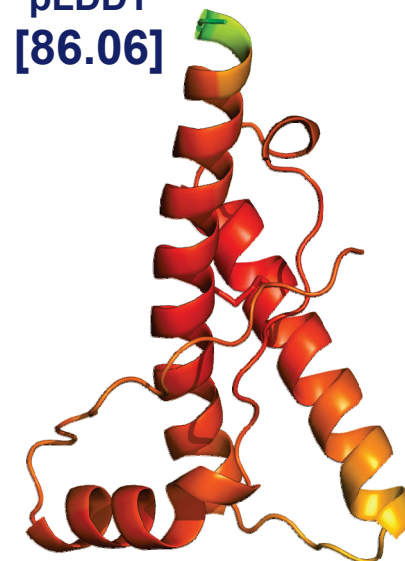

# Field vole

GenBank: AF367625

P100%

100



100

## Microtus agrestis

Rodentia 81/101  
Cricetidae 25/27

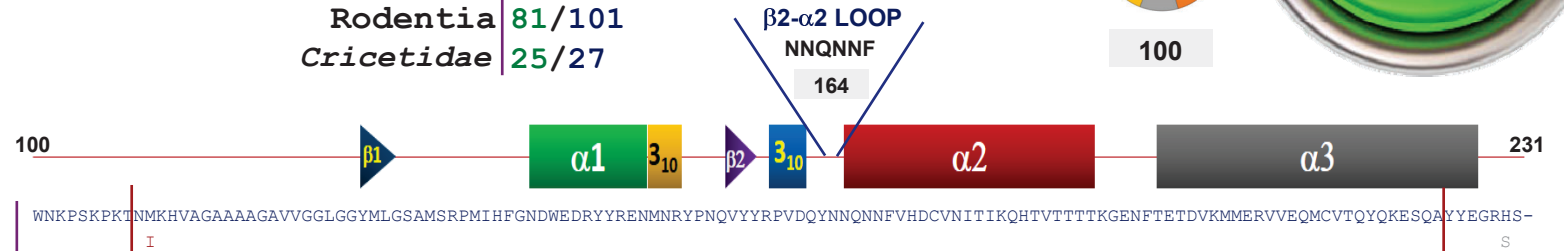

PrP sequence differs by 1 amino acids from the bank vole PrP (see in red)

No deletions  
No insertions  
No polymorphic variants found

Distinct primary sequence across species

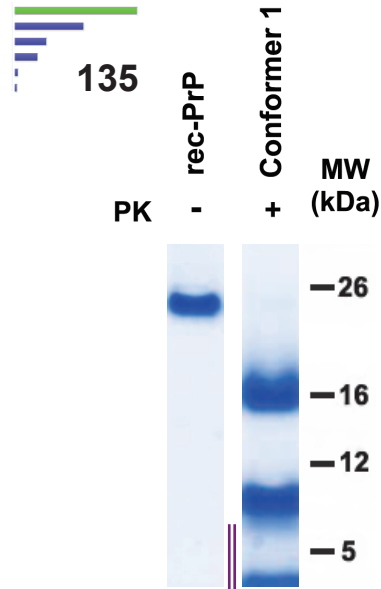

210 AA

1  
Conformers



Tm<sup>Exp</sup>: ND

ΔΔG: -1.99

### In vitro studies

TgVole (1x) Not tested  
Field vole Not tested

### In vivo studies

TgVole (1x) Not tested  
Field vole Not tested

pLDDT  
[87.91]

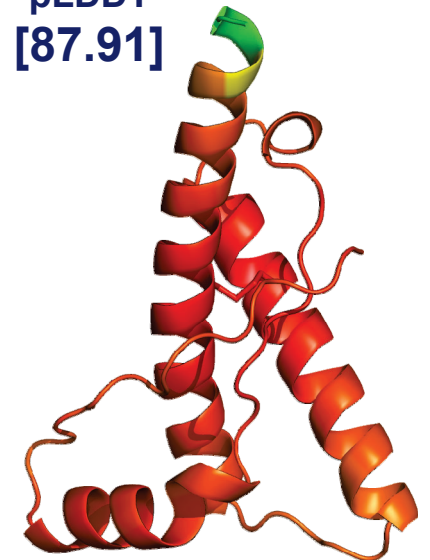

Distinct primary sequence across species

# Common vole

GenBank: **BK064089**

P100%



100

## *Microtus arvalis*

Rodentia **81/101**  
Cricetidae **25/27**

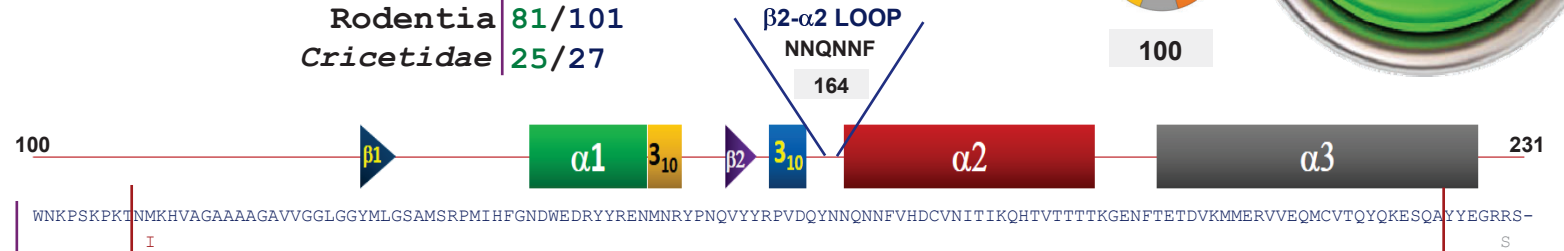

PrP sequence differs by 1 amino acids from the bank vole PrP (see in red)

- No deletions
- No insertions
- No polymorphic variants found

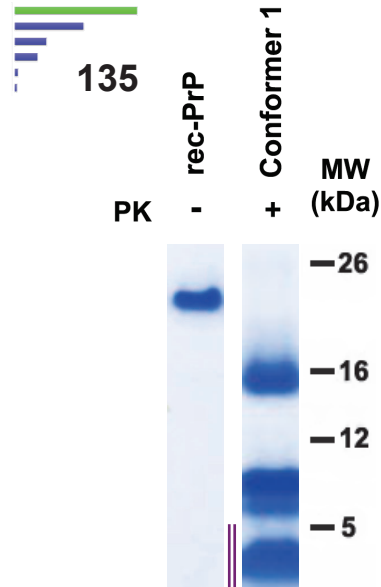

210 AA

**1**  
Conformers



Tm<sup>Exp</sup>: ND

ΔΔG: **2.34**

### *In vitro* studies

- TgVole (1x) Not tested
- Common vole Not tested

### *In vivo* studies

- TgVole (1x) Not tested
- Common vole Not tested

pLDDT  
[87]

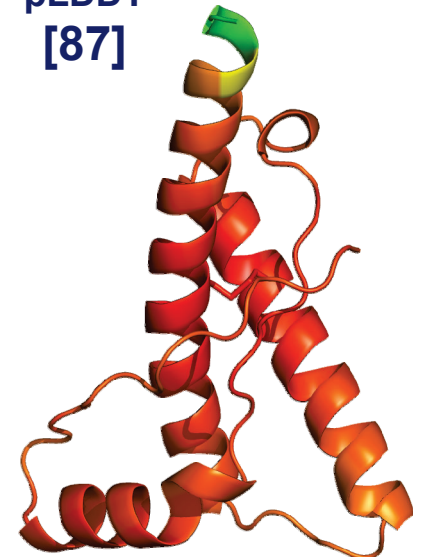

Distinct primary sequence across species

# Reed vole

GenBank: **BK064090**

P92%

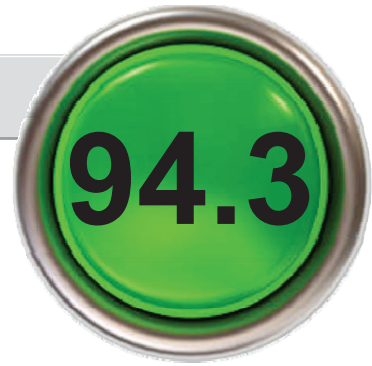

90-100

## *Microtus fortis*

Rodentia **81/101**  
Cricetidae **25/27**

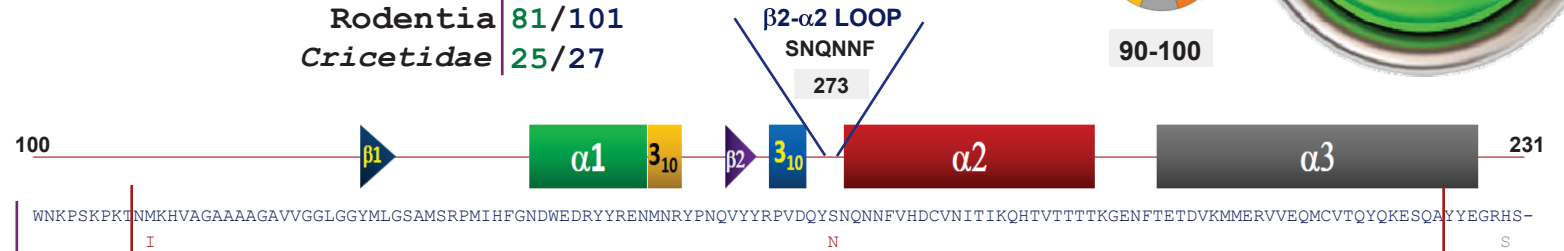

PrP sequence differs by 2 amino acids from the bank vole PrP (see in red)

No deletions  
No insertions  
No polymorphic variants found

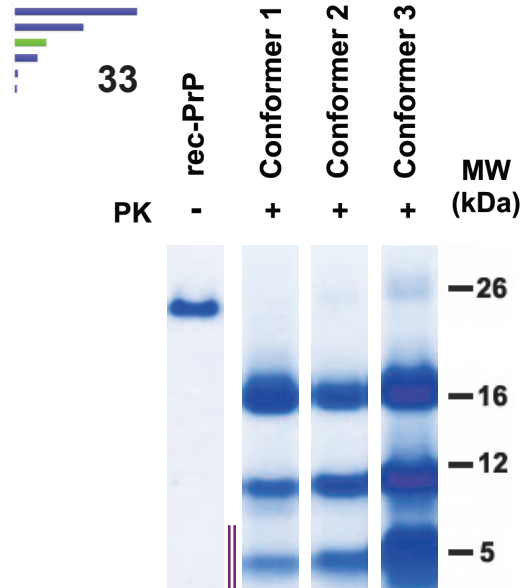

210 AA

**3**  
Conformers

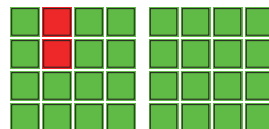

Tm<sup>Exp</sup>: ND  
 $\Delta\Delta G$ : **-3.21**

### *In vitro* studies

TgVole (1x) Not tested  
Reed vole Not tested

### *In vivo* studies

TgVole (1x) Not tested  
Reed vole Not tested

pLDDT  
[88.37]

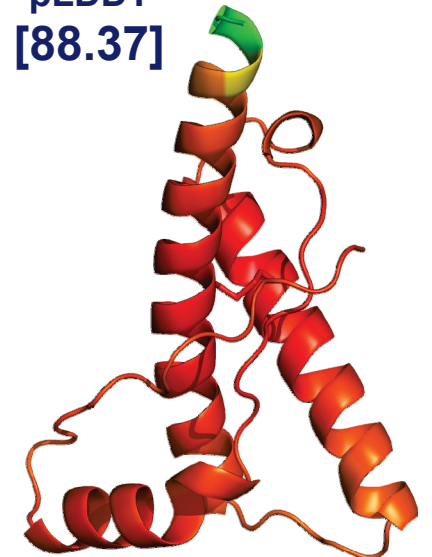

# Prairie vole

GenBank: XM\_005365568

P100%

100

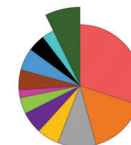

100

## *Microtus ochrogaster*

Rodentia 81/101  
Cricetidae 25/27

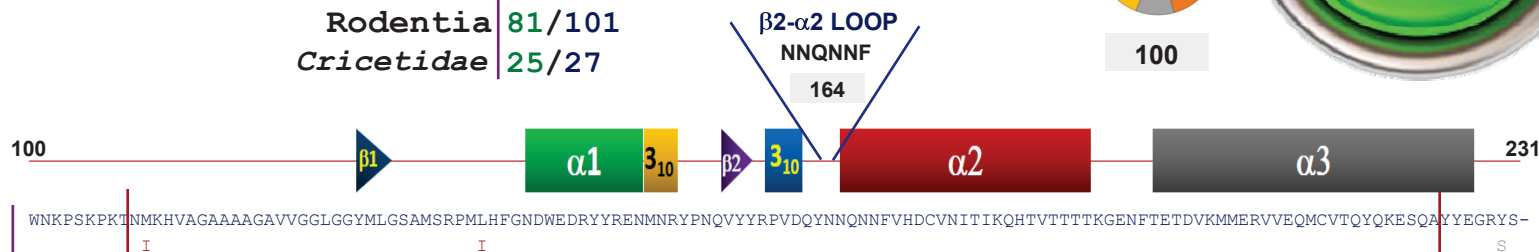

PrP sequence differs by 2 amino acids from the bank vole PrP (see in red)

No deletions  
No insertions  
No polymorphic variants found

Distinct primary sequence across species

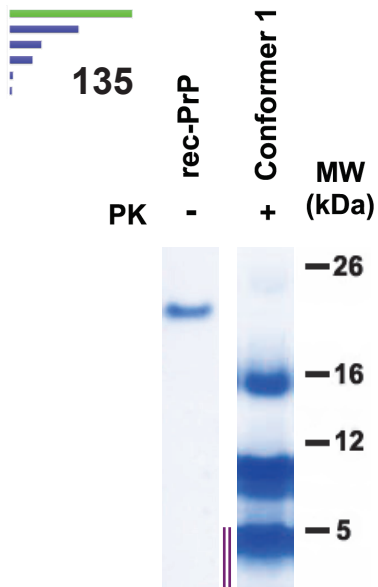

210 AA

1  
Conformers

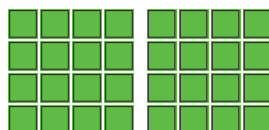

Tm<sup>Exp</sup>: ND

ΔΔG: -13.33

### *In vitro* studies

TgVole (1x) Not tested  
Prairie vole Not tested

### *In vivo* studies

TgVole (1x) Not tested  
Prairie vole Not tested

pLDDT  
[87.02]

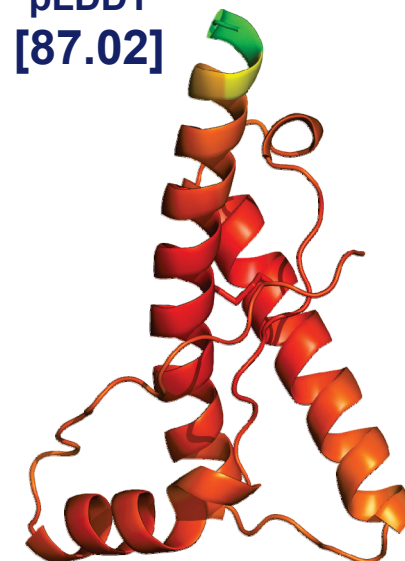

Distinct primary sequence across species

# Tundra vole

GenBank: **BK064091**

## *Microtus oeconomus*

Rodentia **81/101**  
Cricetidae **25/27**

P100%



100

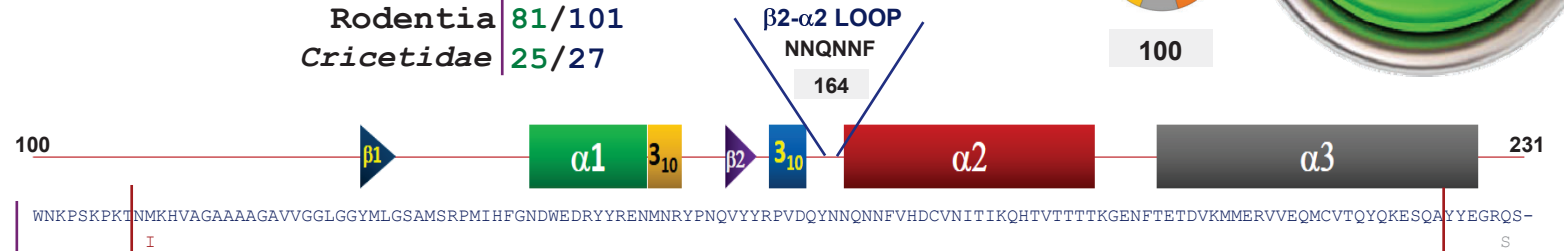

PrP sequence differs by 1 amino acids from the bank vole PrP (see in red)

No deletions  
No insertions  
No polymorphic variants found

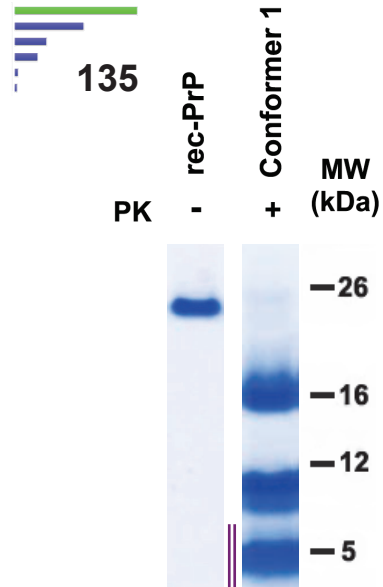

210 AA

**1**  
Conformers

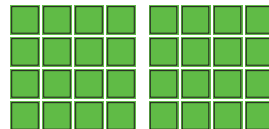

Tm<sup>Exp</sup>: ND

ΔΔG: **-3.36**

### *In vitro* studies

TgVole (1x) Not tested  
Tundra vole Not tested

### *In vivo* studies

TgVole (1x) Not tested  
Tundra vole Not tested

pLDDT  
**[86.03]**

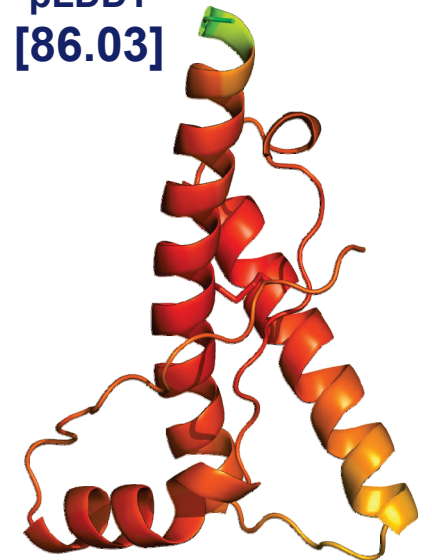

# Creeping vole

GenBank: **BK064150**

P68%

42.9



40-50

## *Microtus oregoni*

Rodentia 81/101  
Cricetidae 25/27

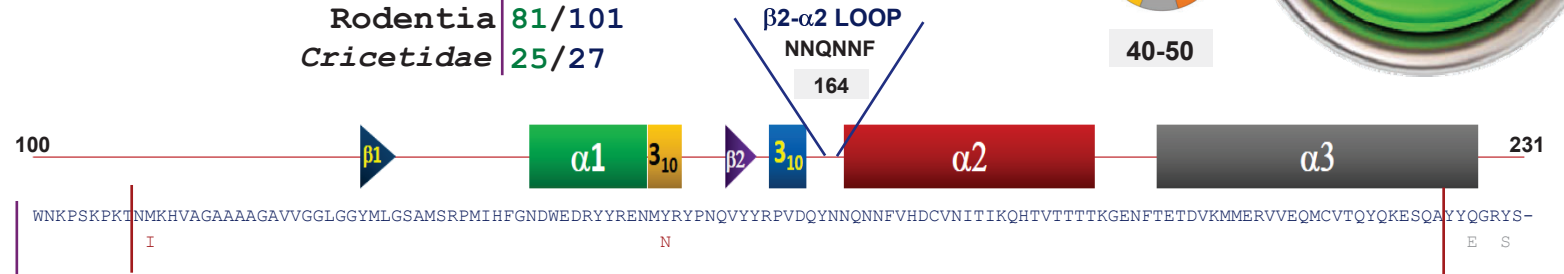

PrP sequence differs by 2 amino acids from the bank vole PrP (see in red)

No deletions  
No insertions  
No polymorphic variants found

Distinct primary sequence across species

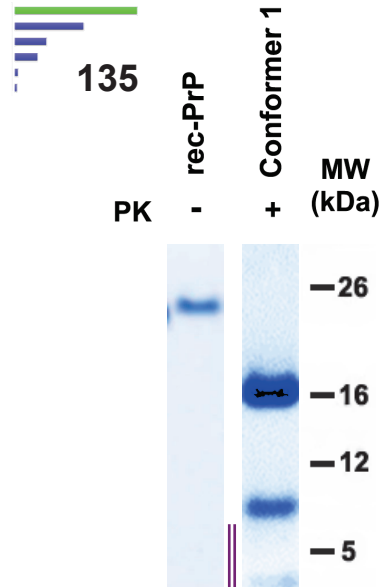

210 AA

1  
Conformers

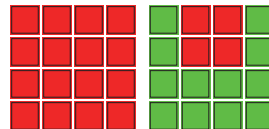

Tm<sup>Exp</sup>: ND

ΔΔG: -4.39

### *In vitro* studies

TgVole (1x) Not tested  
Creeping vole Not tested

### *In vivo* studies

TgVole (1x) Not tested  
Creeping vole Not tested

pLDDT  
[88.42]

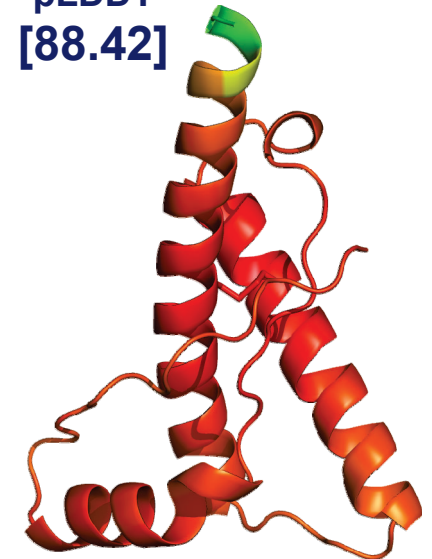

# Meadow vole

GenBank: GQ850541

P92%

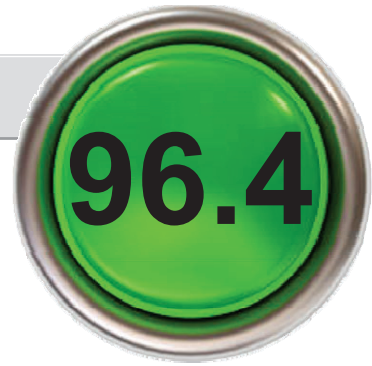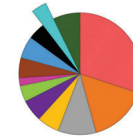

90-100

## *Microtus pennsylvanicus*

Rodentia 81/101  
Cricetidae 25/27

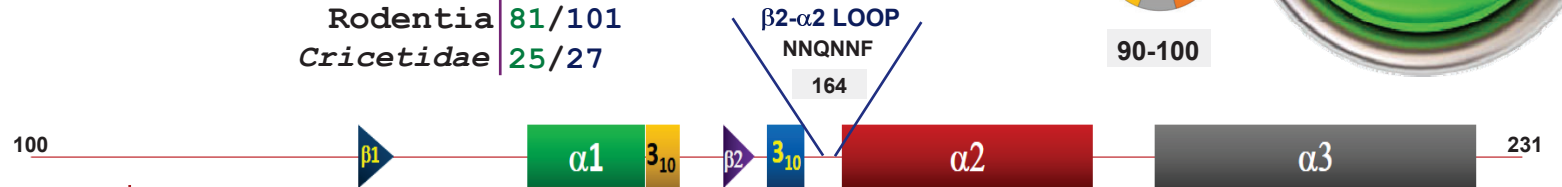

WNKPSKPKTINMKHVAGAAAAGAVVGGGLGGYMLGSAMSRPMIHFGNDWEDRYRENMNRYPNQVYYRPVDQYNNQNNFVHDCVNIITIKQHTVTTTTTKGENFTETDVKMMERVVEQMCVTQYQKESQAYYEGRYS-

PrP sequence differs by 1 amino acids from the bank vole PrP (see in red)

No deletions  
No insertions  
No polymorphic variants found

3 species sharing the same primary sequence

- California vole *Microtus californicus*
- Montane vole *Microtus montanus*
- Water vole *Microtus richardsoni*

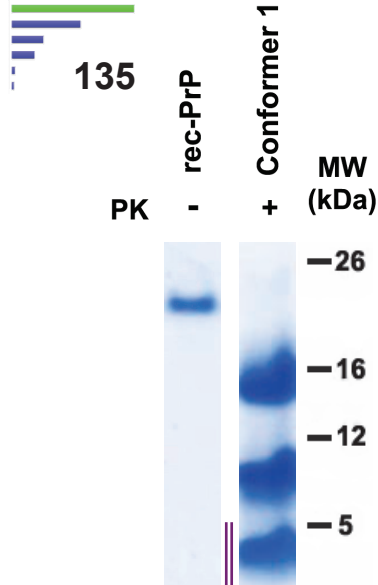

210 AA

1  
Conformers

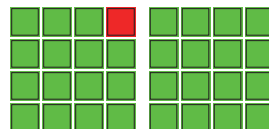

Tm<sup>Exp</sup>: ND

ΔΔG: -3.72

### In vitro studies

TgVole (1x) Not tested  
Meadow vole Not tested

### In vivo studies

TgVole (1x) Not tested  
Meadow vole Not tested

pLDDT [88.74]

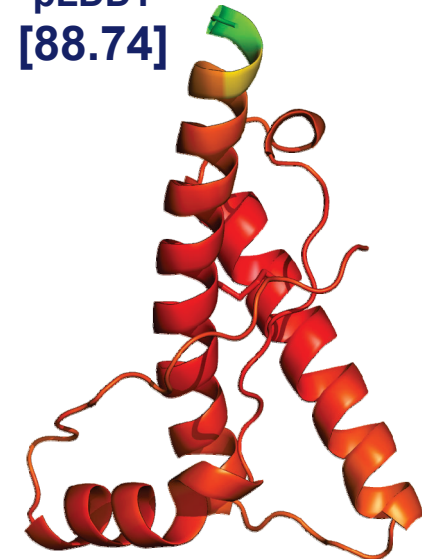



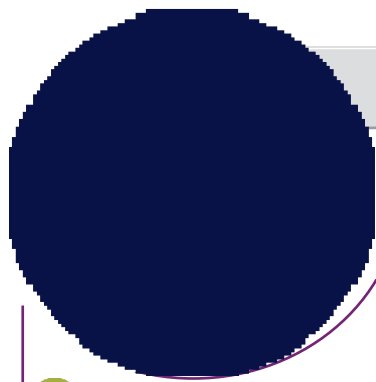

# Mouse

GenBank: NM\_011170

P85%

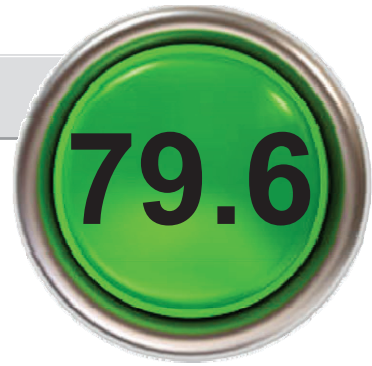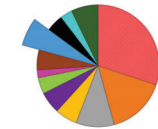

70-80

## Mus musculus

Rodentia 81/101  
Muridae 16/18

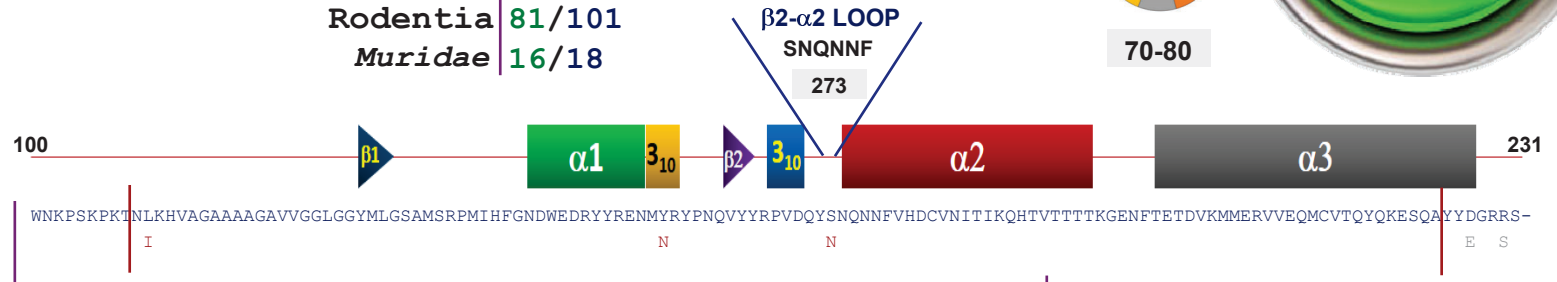

PrP sequence differs by 3 amino acids from the bank vole PrP (see in red)

No deletions  
No insertions  
It shows polymorphic variants

16 species sharing the same primary sequence

- Ryukyu mouse (*Mus caroli*)
- Cook's mouse (*Mus cookii*)
- Fawn-colored mouse (*Mus cervicolor*)
- Sheath-tailed mouse (*Mus fragilicauda*)
- Wood mouse (*Apodemus sylvaticus*)
- Indo pencil-tailed tree mouse (*Chiropodomys gliroides*)
- Steppe mouse (*Mus spicilegus*)
- E broad-toothed field mouse (*Apodemus mystacinus*)
- African pygmy mouse (*Mus minotoides*)
- Algerian mouse (*Mus spretus*)
- Large Japanese field mouse (*Apodemus speciosus*)
- Delectable soft-furred mouse (*Praomys delectorum*)
- Desert mouse (*Pseudomys desertor*)
- Broad-toothed mouse (*Mastacomys fuscus*)
- Smoky mouse (*Pseudomys fumeus*)
- Rakali (*Hydromys chrysogaster*)

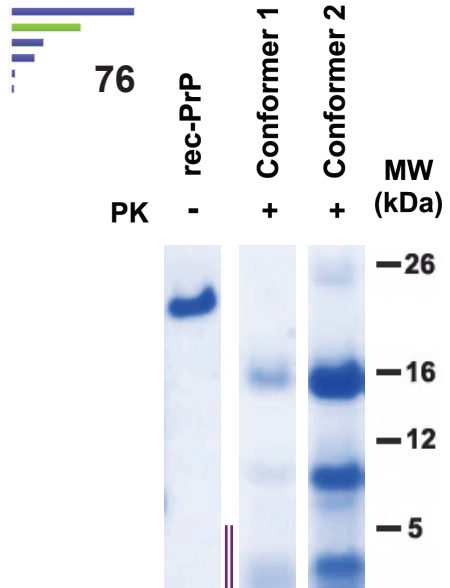

210 AA

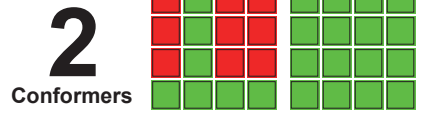

Tm<sup>Exp</sup>: 68.3 °C  
ΔΔG: -3.3

### In vitro studies

TgVole (1x) Propagate  
Mouse Propagate

### In vivo studies

TgVole (1x) Infectious  
Mouse Infectious

pLDDT [86.15]

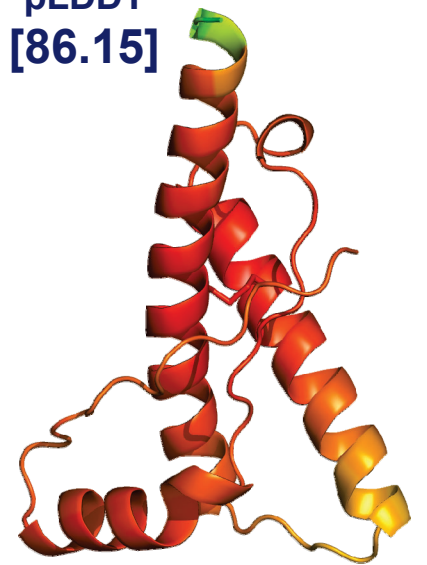

# Hazel dormouse

GenBank: **BK064106**

**P52%**



10-20

## *Muscardinus avellanarius*

Rodentia **81/101**  
Gliridae **3/3**

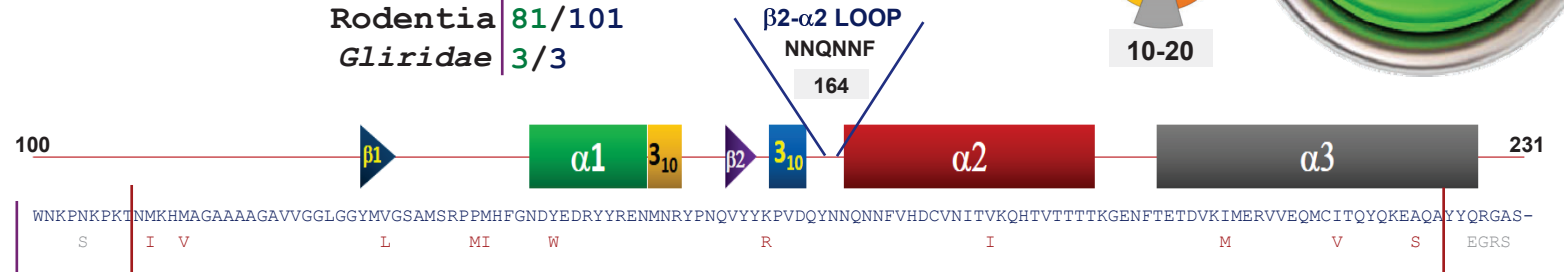

PrP sequence differs by 11 amino acids from the bank vole PrP (see in red)

- No deletions
- No insertions
- No polymorphic variants found

Distinct primary sequence across species

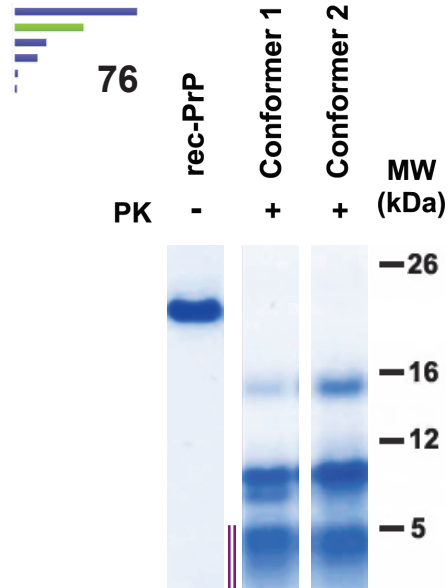

214 AA

**2**  
Conformers

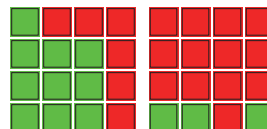

Tm<sup>Exp</sup>: ND  
 $\Delta\Delta G$ : **-5.66**

### *In vitro* studies

TgVole (1x) Not tested  
Hazel dormouse Not tested

### *In vivo* studies

TgVole (1x) Not tested  
Hazel dormouse Not tested

pLDDT  
**[86.22]**

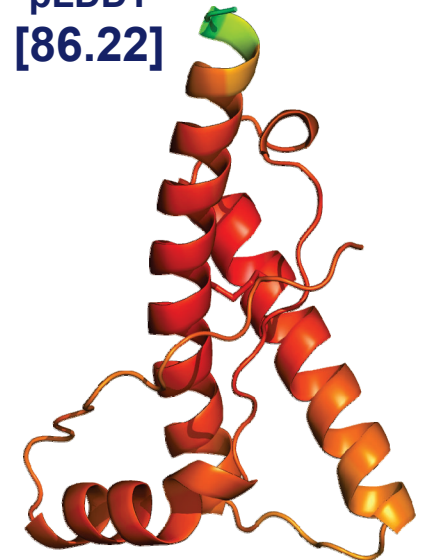

Distinct primary sequence across species

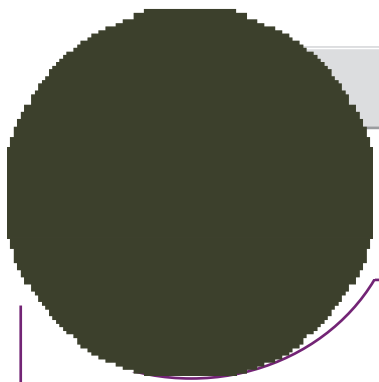

# Coypu

GenBank: [BK064010](#)

P29%



0

## *Myocastor coypus*

Rodentia 81/101

Echimyidae 0/1

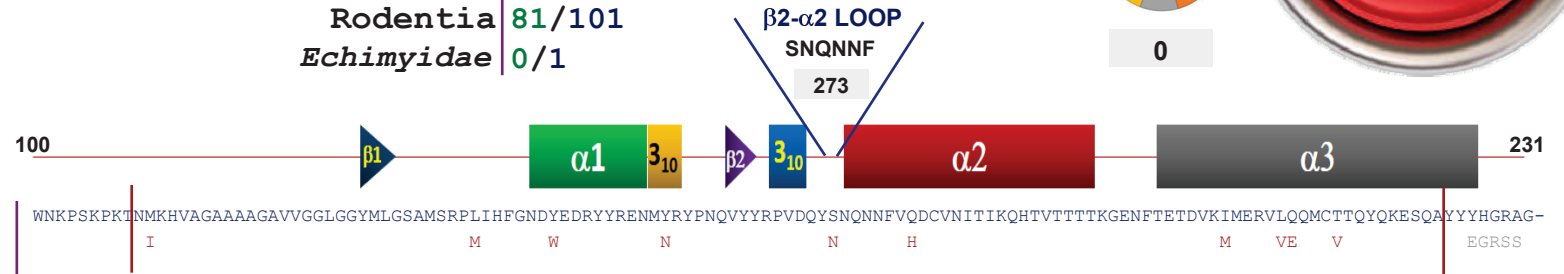

PrP sequence differs by 10 amino acids from the bank vole PrP (see in red)

- No deletions
- No insertions
- No polymorphic variants found

T<sub>m</sub><sup>Exp</sup>: ND

ΔΔG: ND

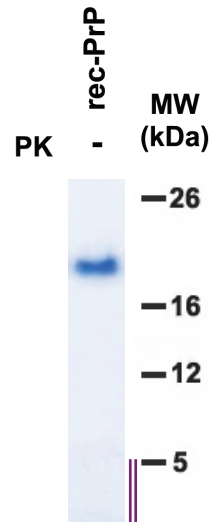

202 AA

0 Conformers

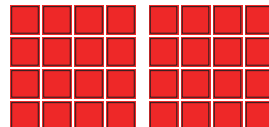

**NO MISFOLDING**

*In vitro* studies

**NOT APPLICABLE**

*In vivo* studies

**NOT APPLICABLE**

pLDDT [84.21]

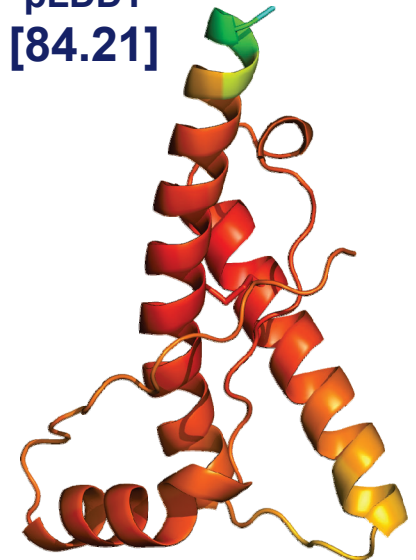

# Southern red-backed vole

GenBank: GQ850538

P100%



100

## *Myodes gapperi*

Rodentia 81/101  
Cricetidae 25/27

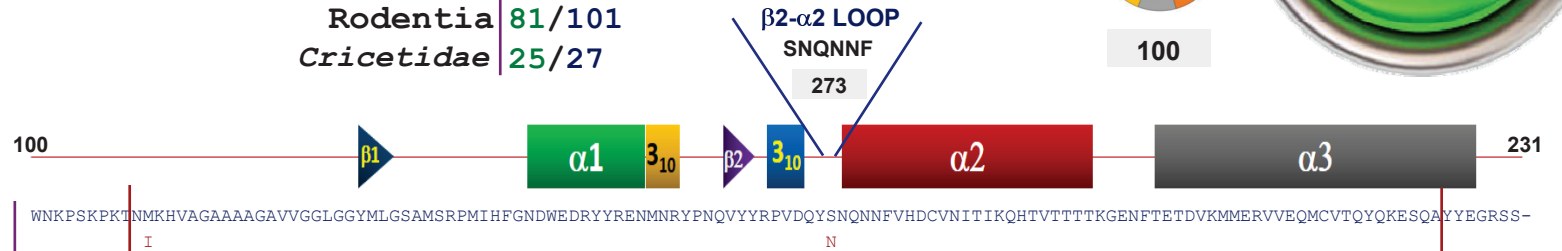

PrP sequence differs by 2 amino acids from the bank vole PrP (see in red)

No deletions  
No insertions  
No polymorphic variants found

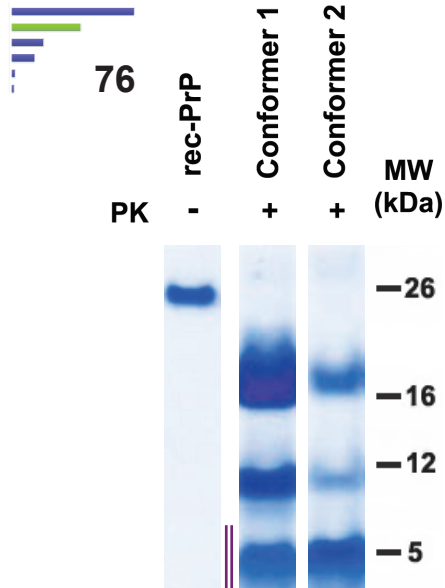

211 AA

2  
Conformers



Tm<sup>Exp</sup>: ND

ΔΔG: 4.84

### *In vitro* studies

TgVole (1x) Not tested  
Southern red-backed vole Not tested

### *In vivo* studies

TgVole (1x) Not tested  
Southern red-backed vole Not tested

pLDDT  
[85.29]

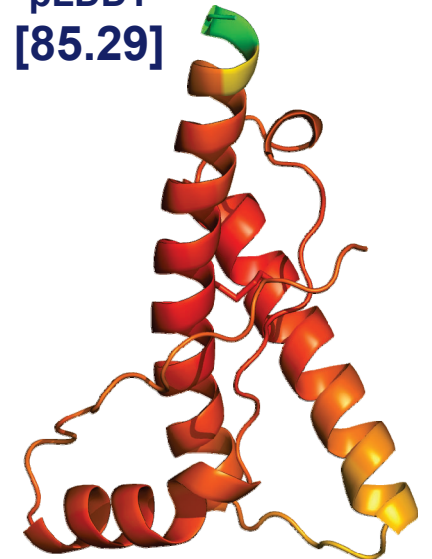

Distinct primary sequence across species

# Bank vole

GenBank: AF367624

P100%

100

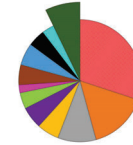

100

## Myodes glareolus

Rodentia 81/101  
Cricetidae 25/27

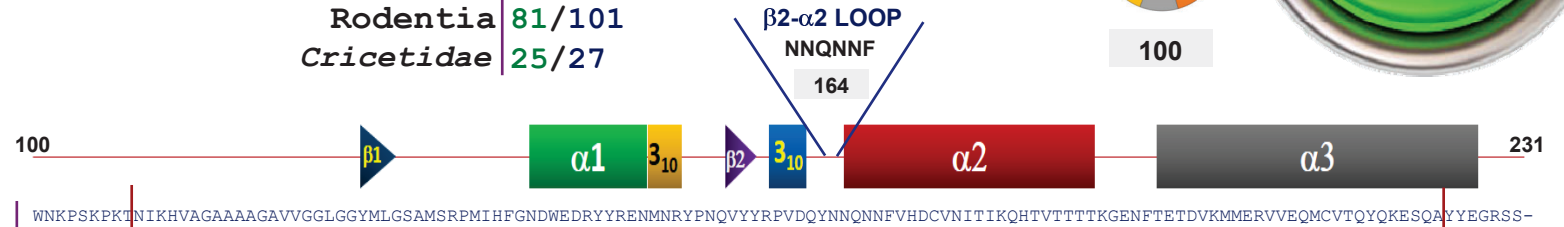

PrP sequence differs by 0 amino acids from the bank vole PrP (see in red)

No deletions  
No insertions  
It shows polymorphic variants

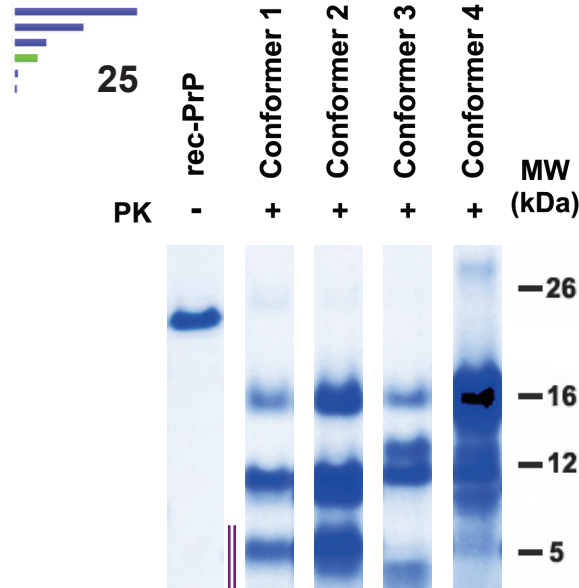

211 AA

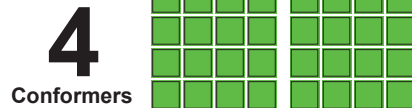

$T_m^{Exp}$ : 66.5 °C  
 $\Delta\Delta G$ : 0

### In vitro studies

TgVole (1x) Propagate  
Mouse Propagate

### In vivo studies

TgVole (1x) Infectious  
Mouse Infectious

pLDDT [87.54]

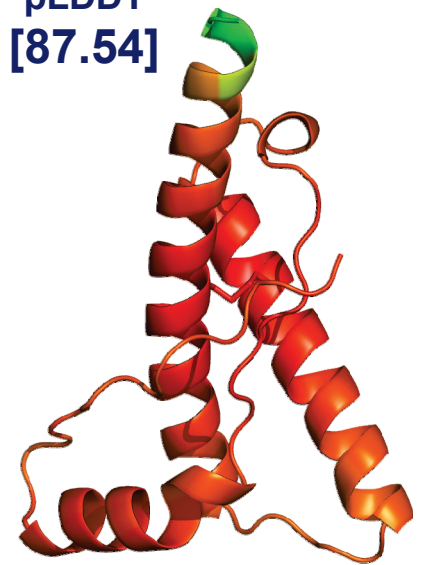

# Sheryglaensis vole

GenBank: **BK064207**

P74%

62.5

## Neodon sheryglaensis

Rodentia **81/101**  
Cricetidae **25/27**

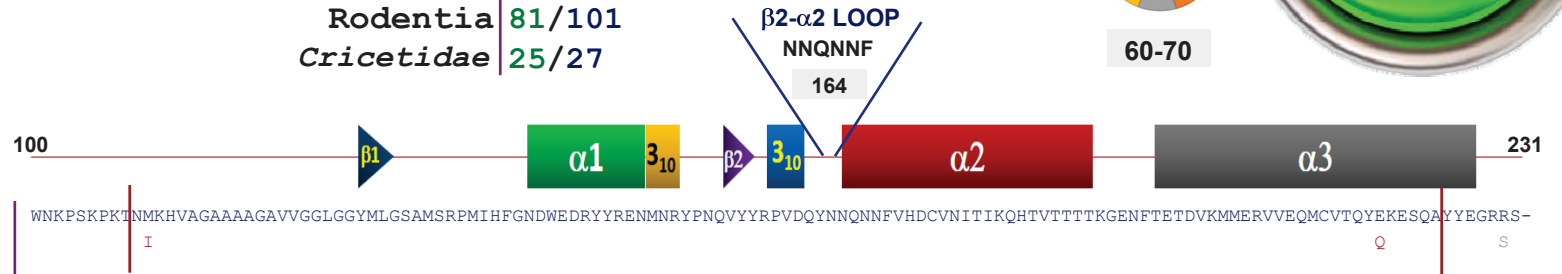

PrP sequence differs by 2 amino acids from the bank vole PrP (see in red)

No deletions  
No insertions  
No polymorphic variants found

Distinct primary sequence across species

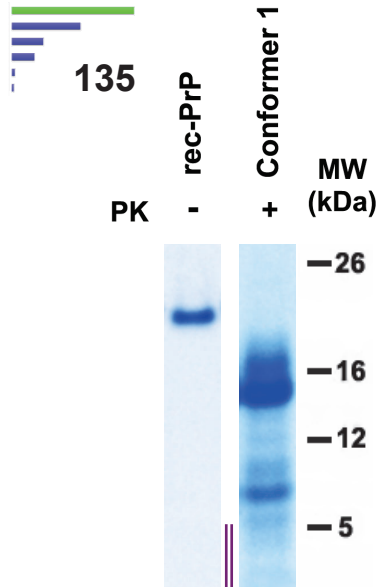

209 AA

**1**  
Conformers

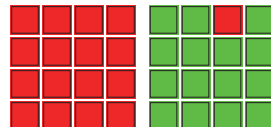

Tm<sup>Exp</sup>: ND

ΔΔG: **-15.47**

### In vitro studies

TgVole (1x) Not tested

Sheryglaensis vole Not tested

### In vivo studies

TgVole (1x) Not tested

Sheryglaensis vole Not tested

pLDDT  
[92.02]

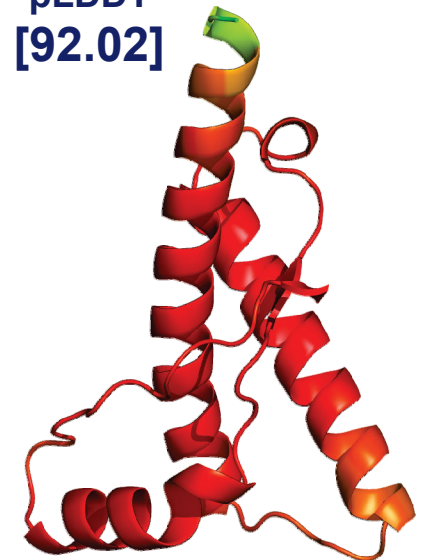

# Desert woodrat

GenBank: **BK064110**

P91%

92.9

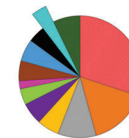

90-100

## *Neotoma lepida*

Rodentia 81/101  
Cricetidae 25/27

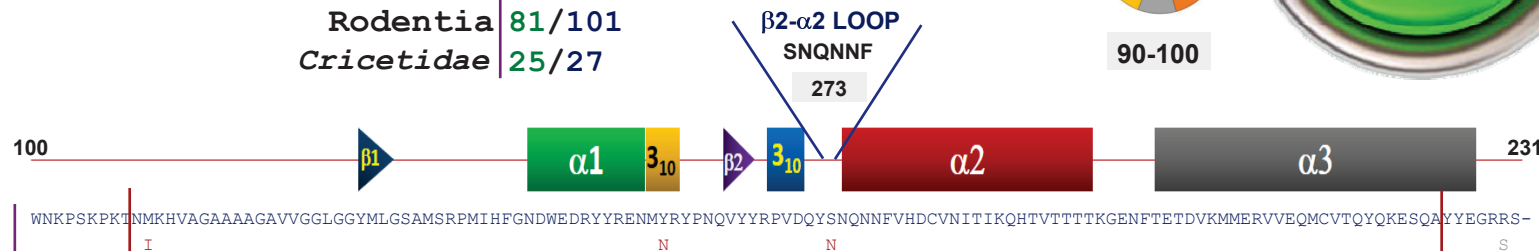

PrP sequence differs by 3 amino acids from the bank vole PrP (see in red)

No deletions  
No insertions  
No polymorphic variants found

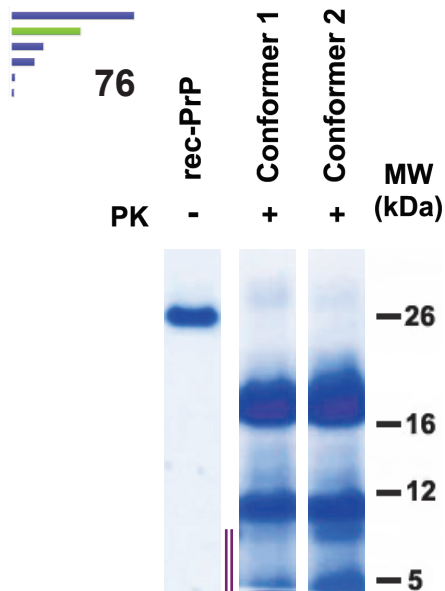

210 AA

2  
Conformers

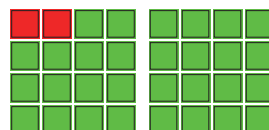

Tm<sup>Exp</sup>: ND

ΔΔG: -3.66

### *In vitro* studies

TgVole (1x) Not tested

Desert woodrat Not tested

### *In vivo* studies

TgVole (1x) Not tested

Desert woodrat Not tested

pLDDT  
[86.56]

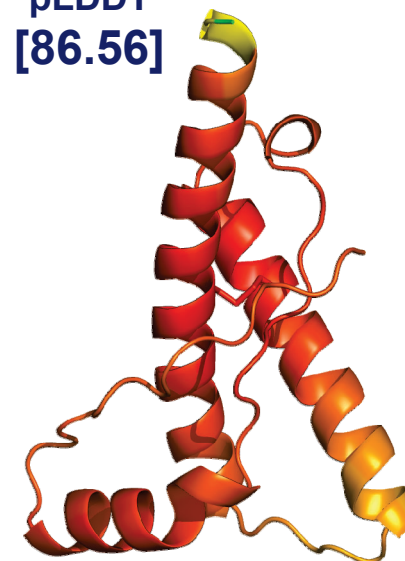

Distinct primary sequence across species

Distinct primary sequence across species

# Common degu

GenBank: XM\_023718589

P81%

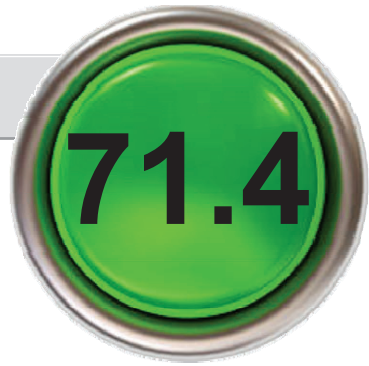

70-80

## Octodon degus

Rodentia 81/101

Octodontidae 3/3

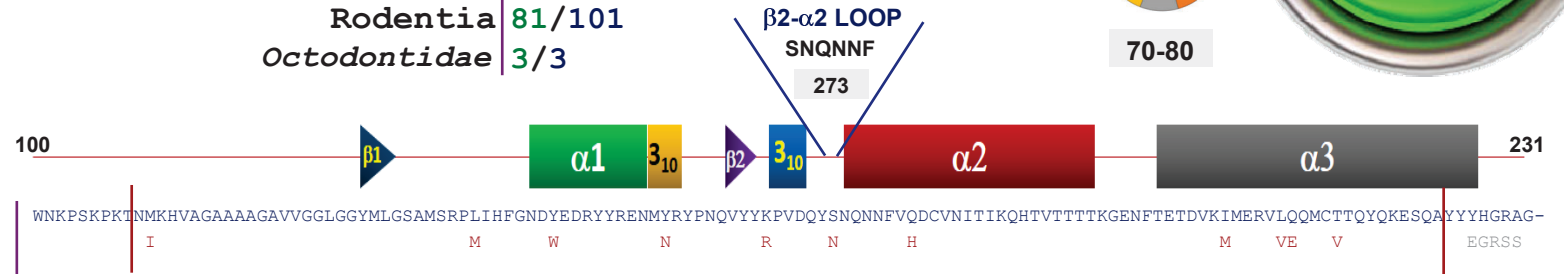

PrP sequence differs by 11 amino acids from the bank vole PrP (see in red)

- No deletions
- No insertions
- No polymorphic variants found

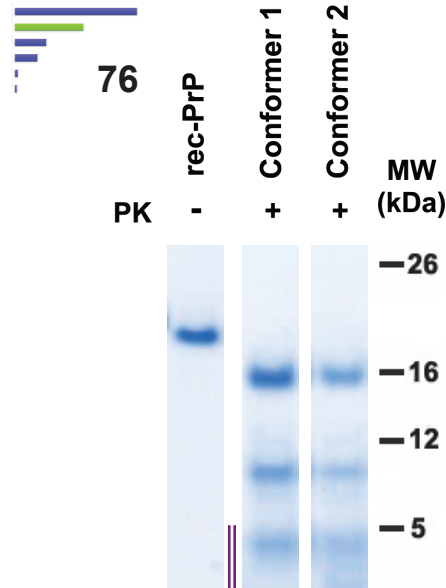

202 AA

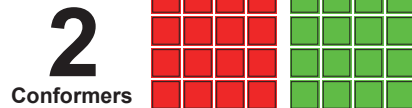

Tm<sup>Exp</sup>: ND  
ΔΔG: ND

### In vitro studies

- TgVole (1x) Not tested
- Common degu Not tested

### In vivo studies

- TgVole (1x) Not tested
- Common degu Not tested

pLDDT [86.1]

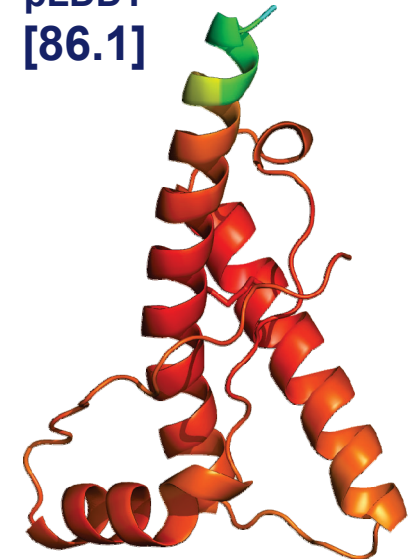



# Mountain viscacha rat

GenBank: **BK064011**

P64%

**33.9**



30-40

## *Octomys mimax*

Rodentia **81/101**

Octodontidae **3/3**

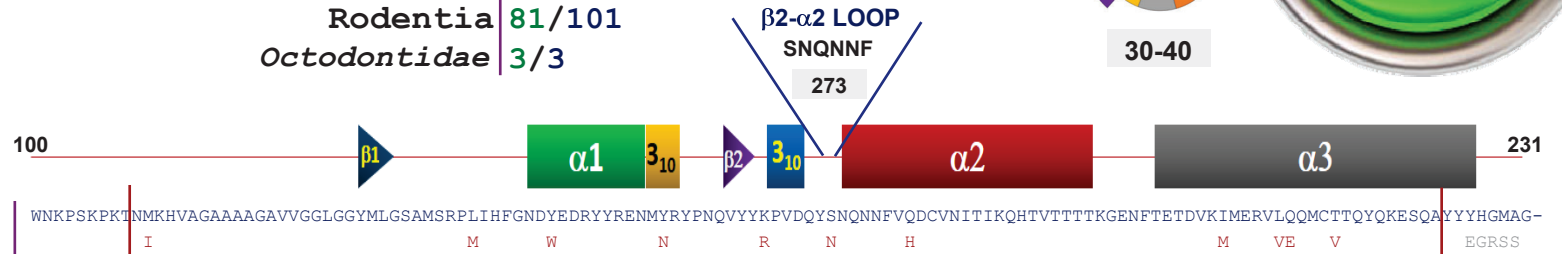

PrP sequence differs by 11 amino acids from the bank vole PrP (see in red)

- No deletions
- No insertions
- No polymorphic variants found

Distinct primary sequence across species

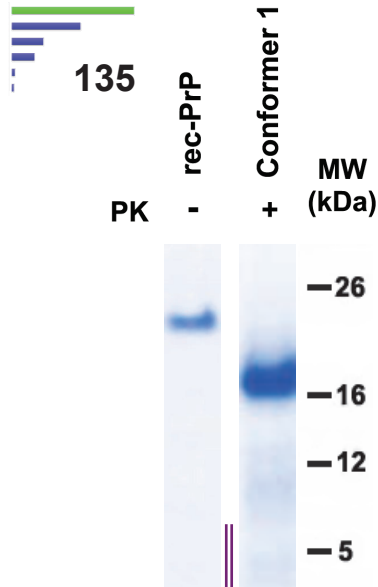

202 AA

**1**  
Conformers

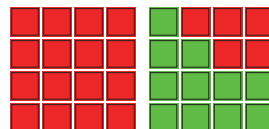

Tm<sup>Exp</sup>: ND

ΔΔG: ND

### *In vitro* studies

TgVole (1x) Not tested

Mountain viscacha rat Not tested

### *In vivo* studies

TgVole (1x) Not tested

Mountain viscacha rat Not tested

pLDDT  
**[84.52]**

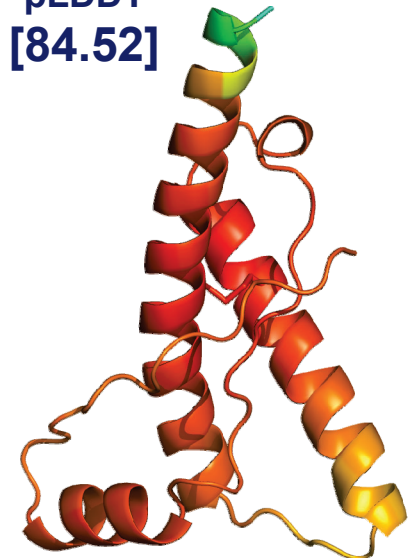

1 species sharing the same primary sequence

# Muskrat

GenBank: **BK064026**

P51%

16.1

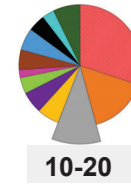

## Ondatra zibethicus

Rodentia 81/101  
Cricetidae 25/27

Arctic lemming  
*Dicrostonyx torquatus*

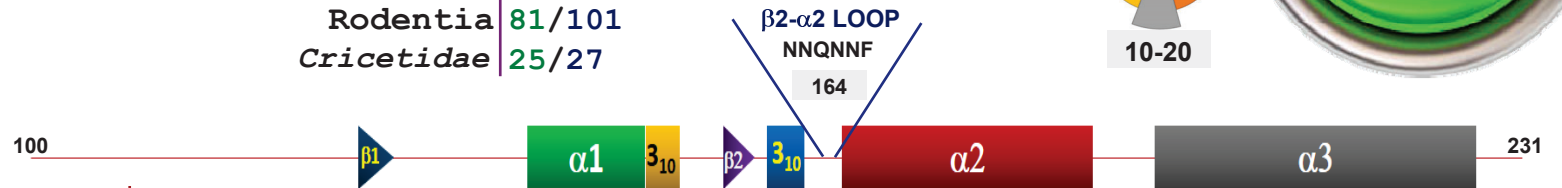

WNKPSKPKTINMKHVAGAAAAGAVVGGGLGGYMLGSAMSRPMIHFGNDWEDRYRENMNRYPNQVYRPPVDQYNNQNNFVHDCVNIITIKQHTVTTTTTKGENFTETDVKMMERVVEQMCVTQYQKESQAYYEGRSS-

PrP sequence differs by 1 amino acids from the bank vole PrP (see in red)

No deletions  
No insertions  
No polymorphic variants found

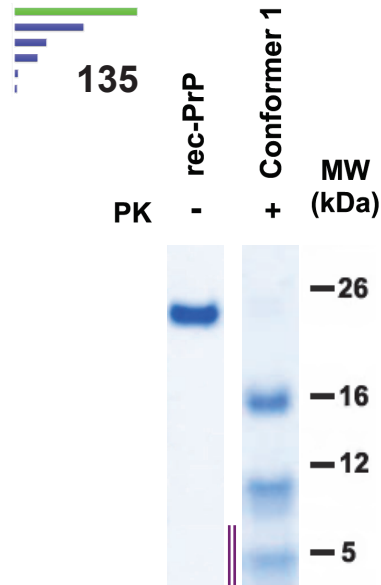

211 AA

1  
Conformers

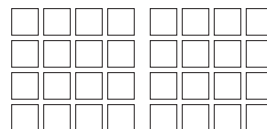

Tm<sup>Exp</sup>: ND

ΔΔG: 0.61

### In vitro studies

TgVole (1x) Not tested  
Muskrat Not tested

### In vivo studies

TgVole (1x) Not tested  
Muskrat Not tested

pLDDT  
[85.74]

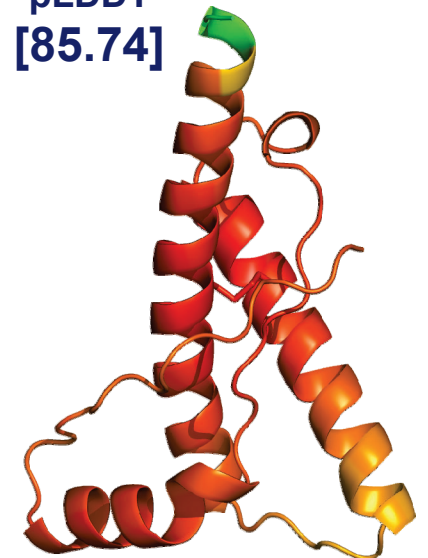

Distinct primary sequence across species

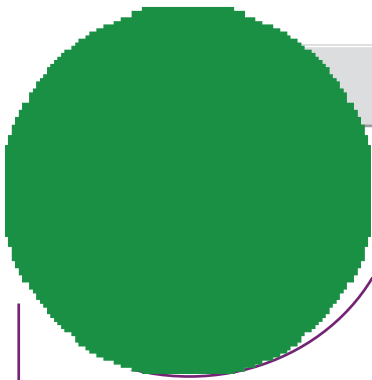

# South African springhare

GenBank: **BK064021**

P100%

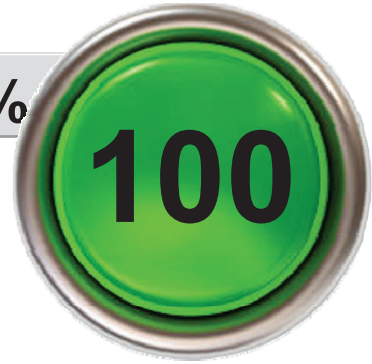

100

## *Pedetes capensis*

Rodentia 81/101  
 Pedetidae 1/1

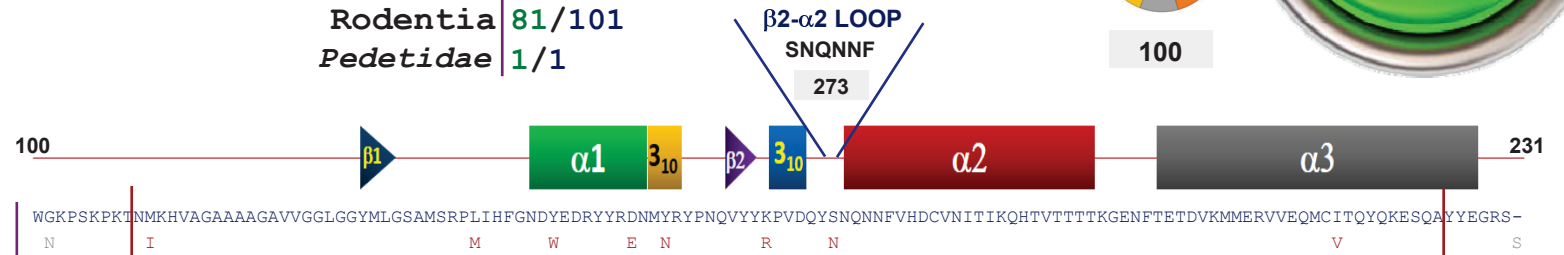

PrP sequence differs by 8 amino acids from the bank vole PrP (see in red)

- No deletions
- No insertions
- No polymorphic variants found

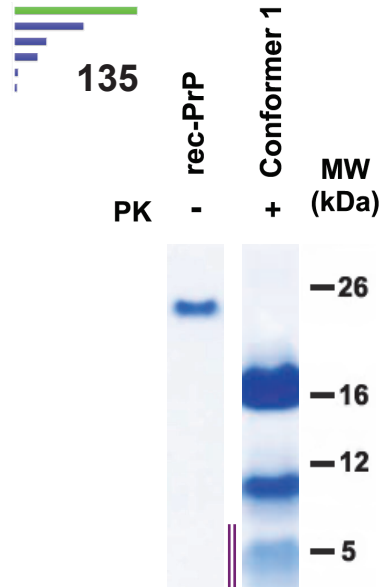

212 AA

1  
 Conformers



Tm<sup>Exp</sup>: ND  
 ΔΔG: ND

### *In vitro* studies

- TgVole (1x) Not tested
- South African springhare Not tested

### *In vivo* studies

- TgVole (1x) Not tested
- South African springhare Not tested

pLDDT  
**[87.98]**

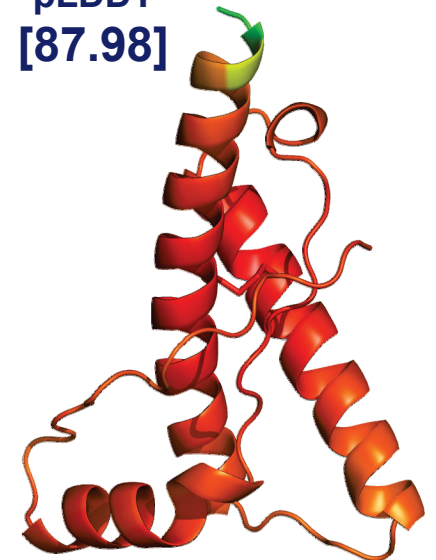

# Little pocket mouse

GenBank: **BK064022**

P34%



0-10

## *Perognathus longimembris*

Rodentia 81/101  
Heteromyidae 5/5

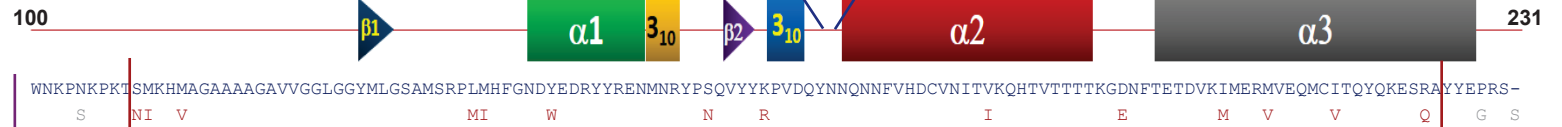

PrP sequence differs by 14 amino acids from the bank vole PrP (see in red)

No deletions  
No insertions  
No polymorphic variants found

Distinct primary sequence across species

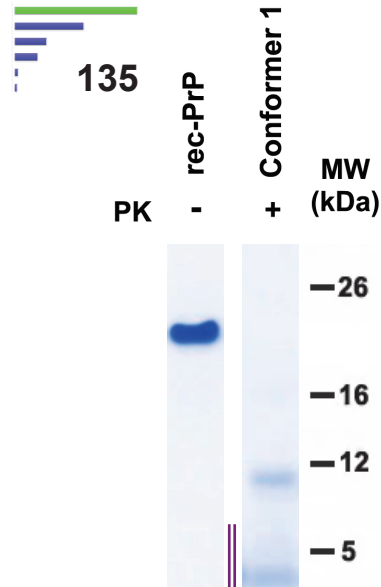

203 AA

1  
Conformers



Tm<sup>Exp</sup>: ND  
ΔΔG: ND

### *In vitro* studies

TgVole (1x) Not tested

Little pocket mouse Not tested

### *In vivo* studies

TgVole (1x) Not tested

Little pocket mouse Not tested

pLDDT [84.21]

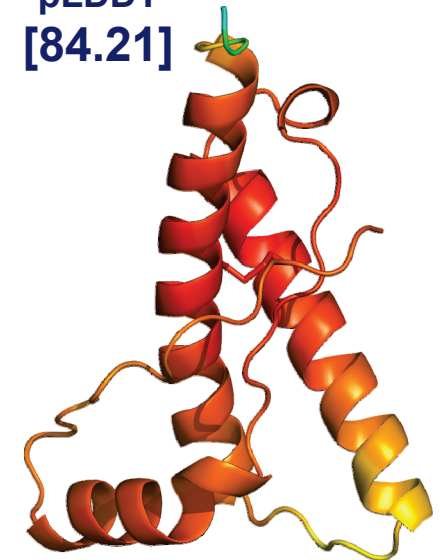

1 species sharing the same primary sequence

# Texas mouse

GenBank: **BK064023**

P59%

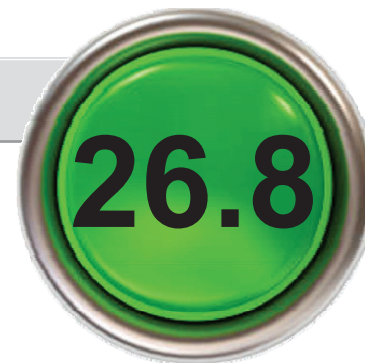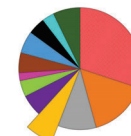

20-30

## *Peromyscus attwateri*

Rodentia 81/101  
Cricetidae 25/27

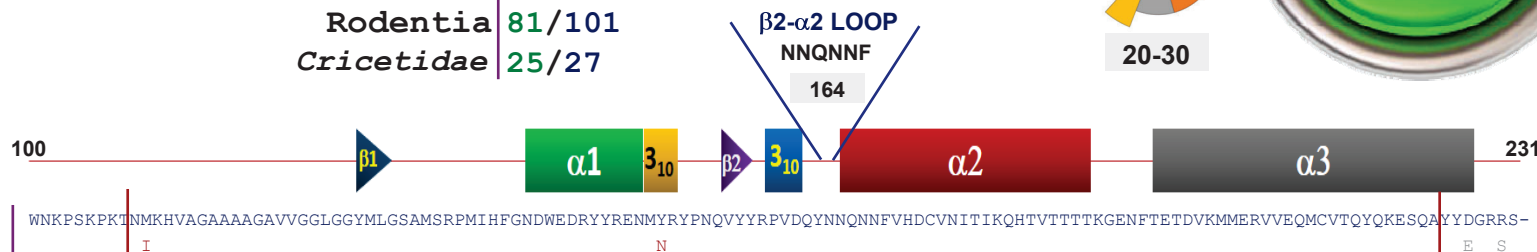

PrP sequence differs by 2 amino acids from the bank vole PrP (see in red)

No deletions  
No insertions  
No polymorphic variants found

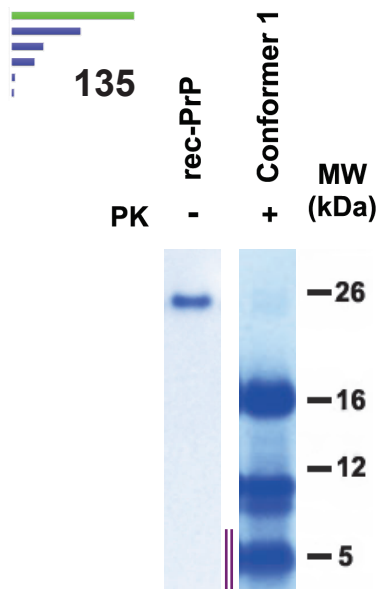

211 AA

1  
Conformers

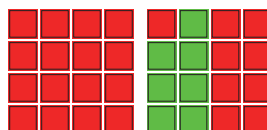

Tm<sup>Exp</sup>: ND

ΔΔG: 1.56

### *In vitro* studies

TgVole (1x) Not tested  
Texas mouse Not tested

### *In vivo* studies

TgVole (1x) Not tested  
Texas mouse Not tested

pLDDT  
[86.14]

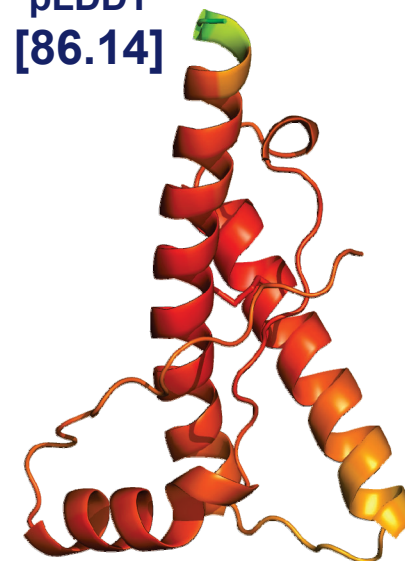

# California mouse

GenBank: **BK064122**

P90%

91.1



90-100

## *Peromyscus californicus insignis*

Rodentia 81/101  
Cricetidae 25/27

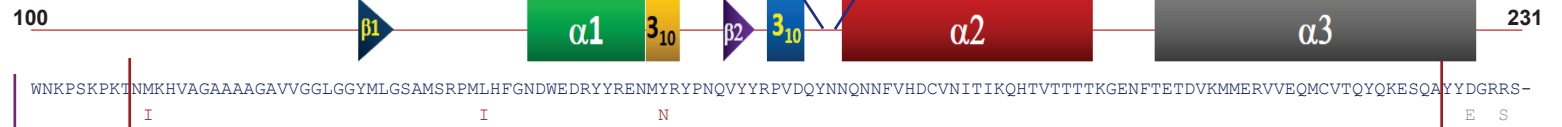

PrP sequence differs by 3 amino acids from the bank vole PrP (see in red)

No deletions  
No insertions  
No polymorphic variants found

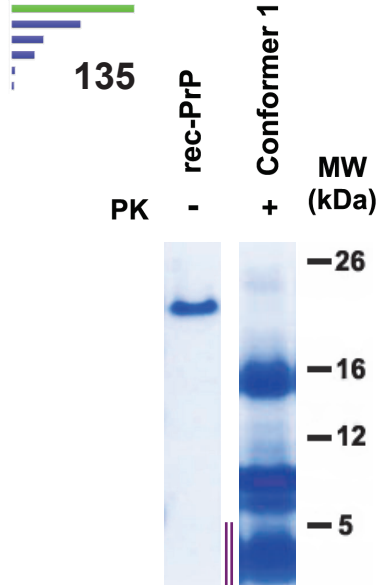

211 AA

1  
Conformers

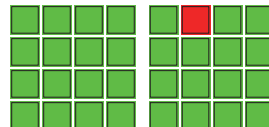

Tm<sup>Exp</sup>: ND

ΔΔG: -8.01

### *In vitro* studies

TgVole (1x) Not tested  
California mouse Not tested

### *In vivo* studies

TgVole (1x) Not tested  
California mouse Not tested

pLDDT [85.67]

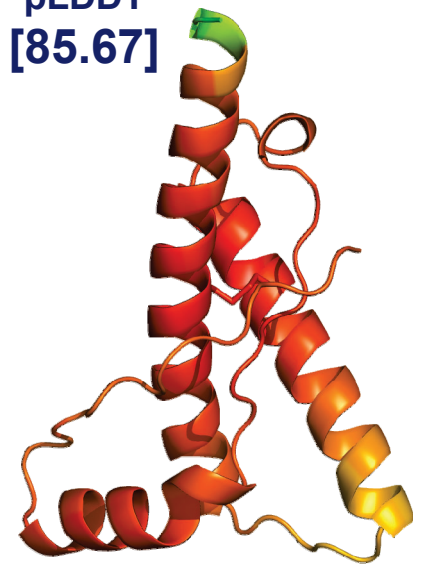

1 species sharing the same primary sequence

Cactus mouse  
*Peromyscus eremicus*

Distinct primary sequence across species

# Canyon mouse

GenBank: **BK064807**

## *Peromyscus crinitus*

Rodentia **81/101**  
Cricetidae **25/27**

**P34%**

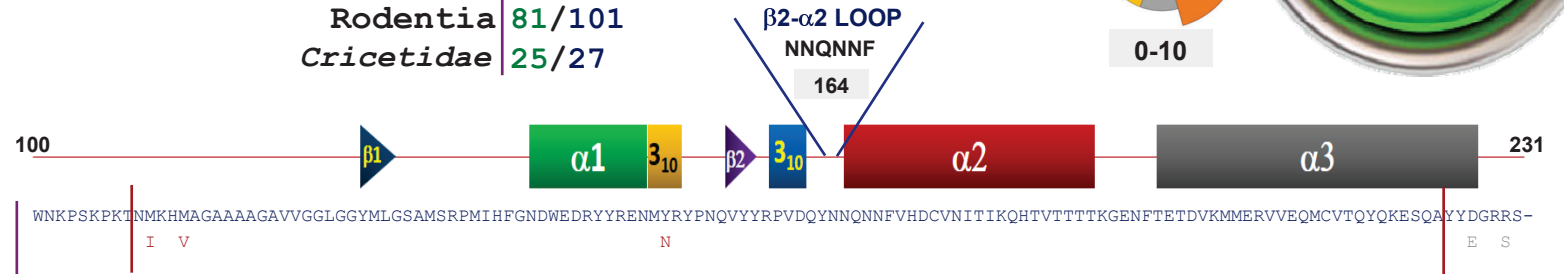

PrP sequence differs by 3 amino acids from the bank vole PrP (see in red)

No deletions  
No insertions  
No polymorphic variants found

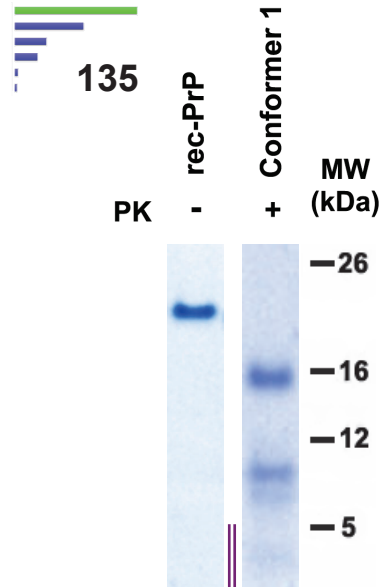

211 AA

**1**  
Conformers

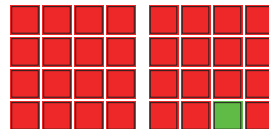

$T_m^{Exp}$ : ND

$\Delta\Delta G$ : **-1.39**

### *In vitro* studies

TgVole (1x) Not tested  
Canyon mouse Not tested

### *In vivo* studies

TgVole (1x) Not tested  
Canyon mouse Not tested

pLDDT  
**[86.18]**

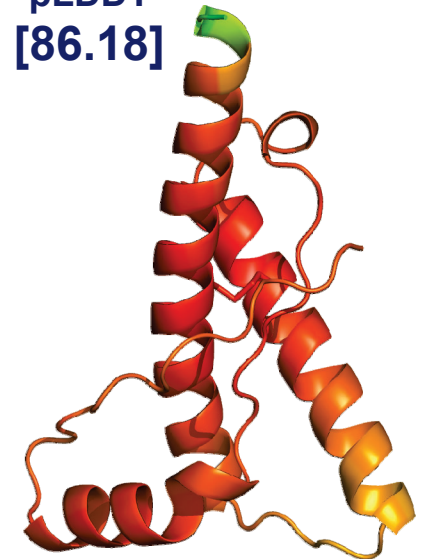

# White-footed mouse

GenBank: XM\_028878611

P86%

82.1



80-90

## *Peromyscus leucopus*

Rodentia 81/101  
Cricetidae 25/27

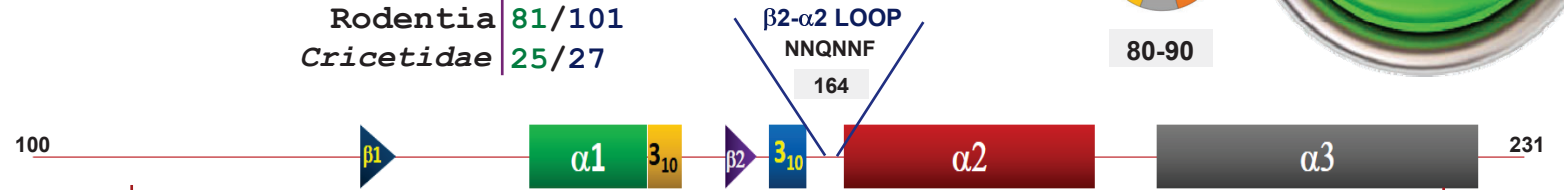

WNKPSKPKTINMKHVAGAAAAGAVVGGGLGGYMLGSAMSRPMIHFGNDWEDRYRENMYRYPNQVYYRPVDQYNNQNNFVHDCVNIITIKQHTVTTTTTKGFNTETDVKMMERVVEQMCVTQYQKESQAYYDGRRS-  
I N E S

PrP sequence differs by 2 amino acids from the bank vole PrP (see in red)

No deletions  
No insertions  
No polymorphic variants found

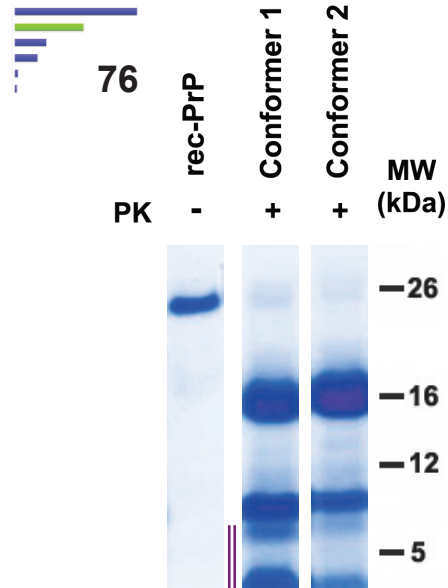

211 AA

2  
Conformers

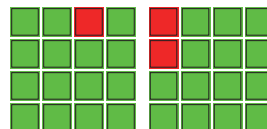

Tm<sup>Exp</sup>: ND

ΔΔG: -1.47

### In vitro studies

TgVole (1x) Not tested

White-footed mouse Not tested

### In vivo studies

TgVole (1x) Not tested

White-footed mouse Not tested

pLDDT [86.22]

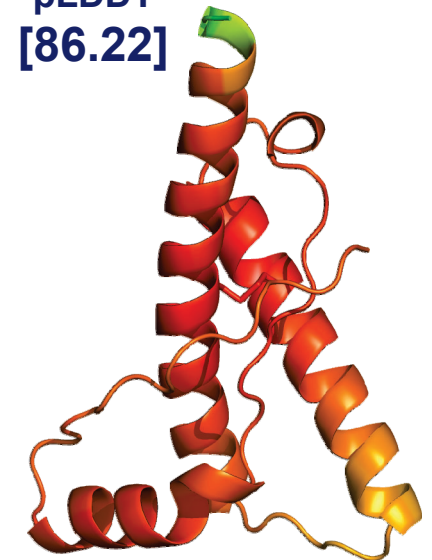

6 species sharing the same primary sequence

- Long-haired grass mouse *Abrothrix hirta*
- Long-haired akodont *Abrothrix longipilis hirtus*
- Southern grasshopper mouse *Onychomys torridus*
- Aztec mouse *Peromyscus aztecus*
- Plateau mouse *Peromyscus melanophrys*
- Mexican deer mouse *Peromyscus mexicanus*



# Oldfield mouse

GenBank: EF467170

P62%

32.5



30-40

## *Peromyscus polionotus subgriseus*

Rodentia 81/101  
Cricetidae 25/27

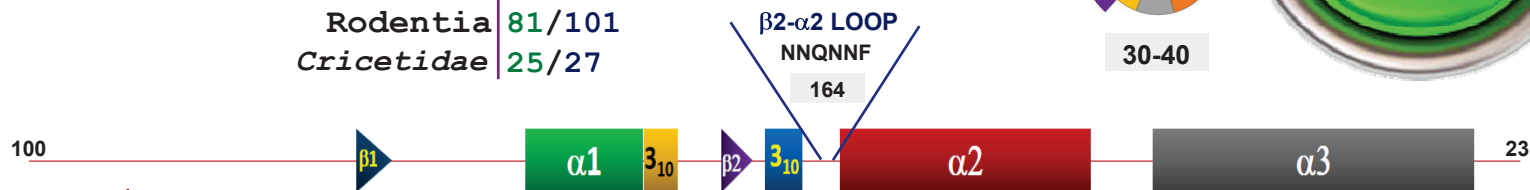

WNKPSKPKTINMKHVAGAAAAGAVVGGGLGGYMLGSAMSRPMIHFGNDWEDRYRENMNRYPNQVYRPPVDQYNNQNNFVHDCVNIITIKQHTVTTTTKGFNTETDVKMMERVVEQMCVTQYQKESQAYYDGRRS-  
E S

PrP sequence differs by 1 amino acids from the bank vole PrP (see in red)

No deletions  
No insertions  
No polymorphic variants found

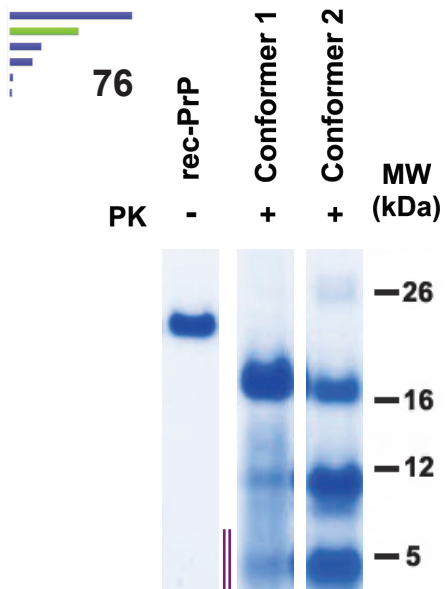

211 AA

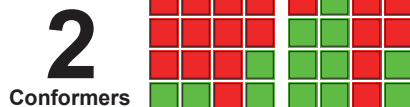

Tm<sup>Exp</sup>: ND

ΔΔG: 1.23

### In vitro studies

TgVole (1x) Not tested

Oldfield mouse Not tested

### In vivo studies

TgVole (1x) Not tested

Oldfield mouse Not tested

pLDDT [86.01]

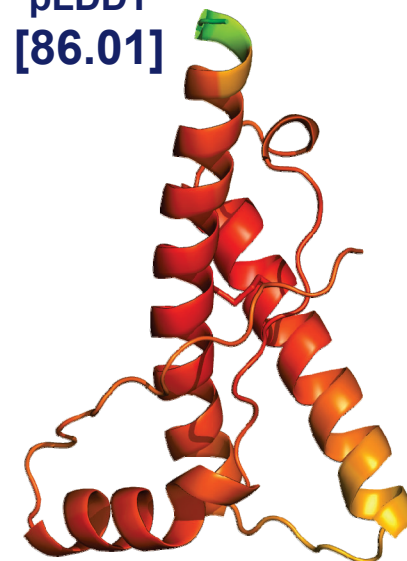

2 species sharing the same primary sequence

Deer mouse  
*Peromyscus maniculatus bairdii*

Roborovski hamster  
*Phodopus roborovskii*

Distinct primary sequence across species

# Red and white giant flying squirrel

GenBank: KM357835

## *Petaurista alborufus*

Rodentia 81/101  
Sciuridae 7/13

P100%



100

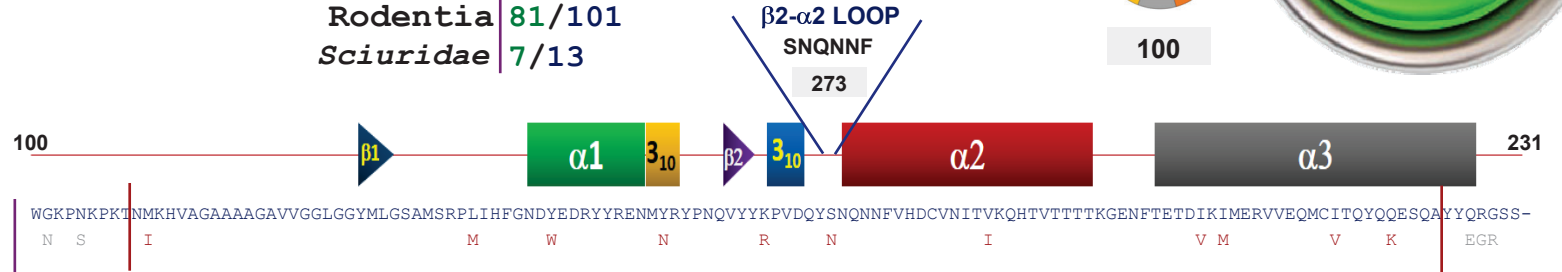

PrP sequence differs by 11 amino acids from the bank vole PrP (see in red)

- No deletions
- No insertions
- No polymorphic variants found

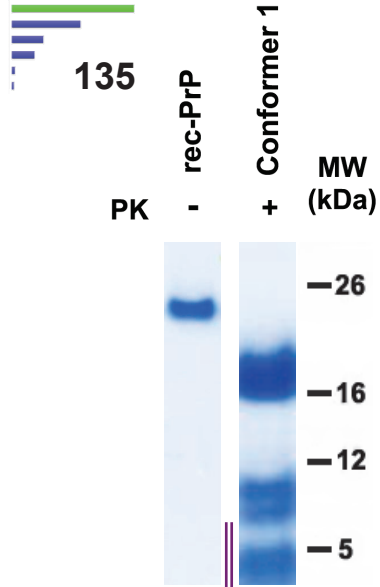

213 AA

1  
Conformers



Tm<sup>Exp</sup>: ND

ΔΔG: -12.03

### *In vitro* studies

- TgVole (1x) Not tested
- Red and white giant flying Not tested

### *In vivo* studies

- TgVole (1x) Not tested
- Red and white giant flying Not tested

pLDDT [87.85]

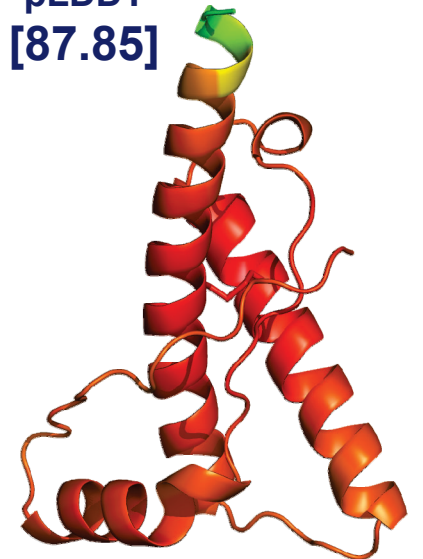

Distinct primary sequence across species

# Dassie rat

GenBank: **BK063990**

P71%

48.2



40-50

## *Petromus typicus*

Rodentia 81/101

*Petromuridae* 1/1

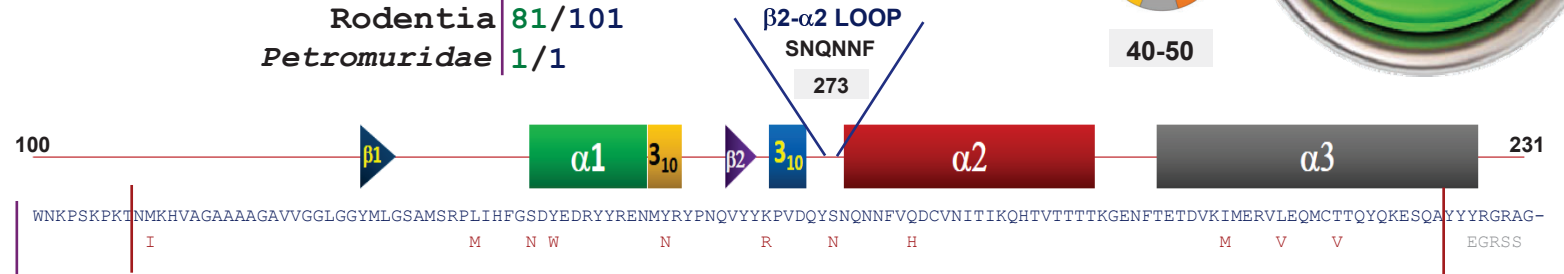

PrP sequence differs by 11 amino acids from the bank vole PrP (see in red)

- No deletions
- No insertions
- No polymorphic variants found

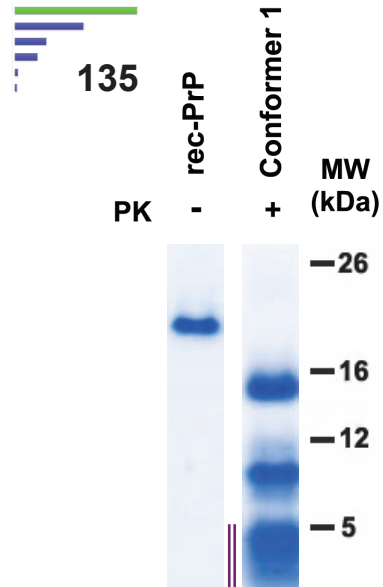

202 AA

**1**  
Conformers

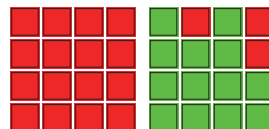

Tm<sup>Exp</sup>: ND

ΔΔG: ND

### *In vitro* studies

- TgVole (1x) Not tested
- Dassie rat Not tested

### *In vivo* studies

- TgVole (1x) Not tested
- Dassie rat Not tested

pLDDT [84.95]

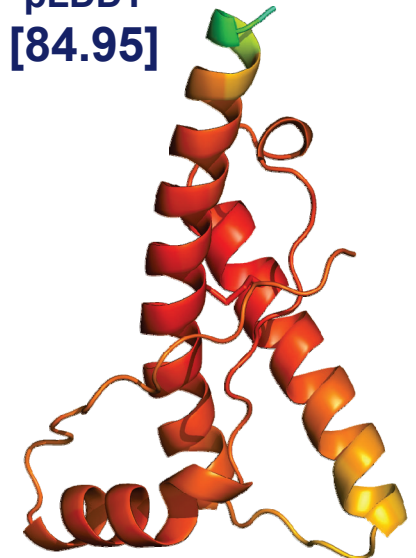

# Campbell's dwarf hamster

GenBank: EU886367

*Phodopus campbelli*

Rodentia 81/101  
Cricetidae 25/27

P90%



90-100

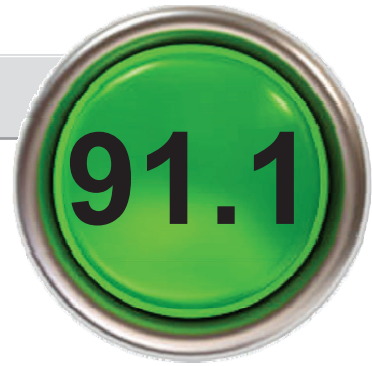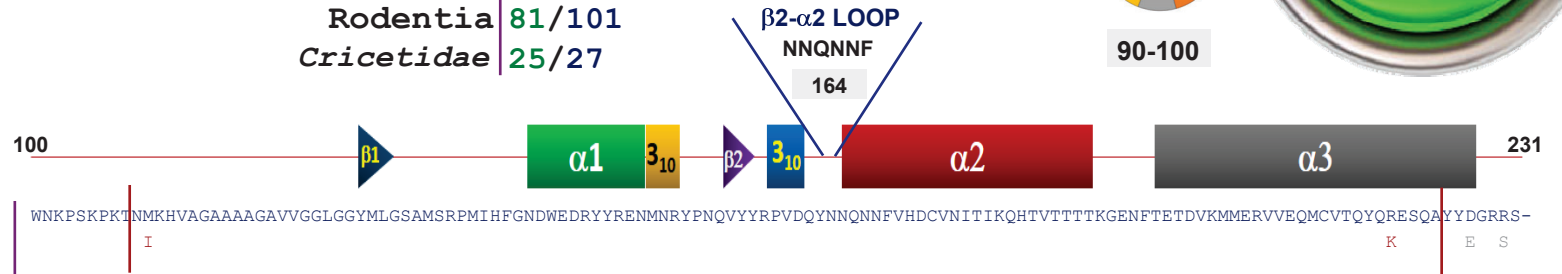

PrP sequence differs by 2 amino acids from the bank vole PrP (see in red)

No deletions  
No insertions  
No polymorphic variants found

Distinct primary sequence across species

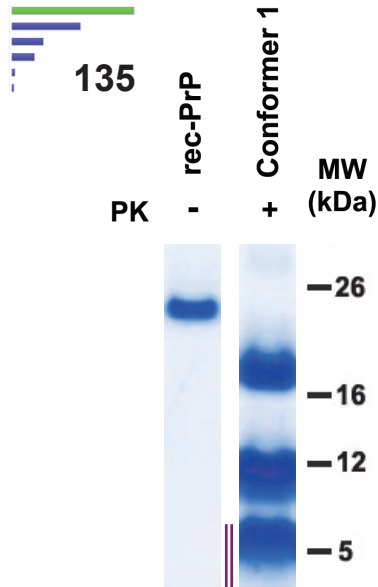

211 AA

1  
Conformers

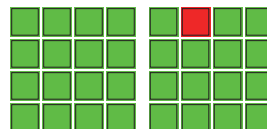

Tm<sup>Exp</sup>: ND

ΔΔG: -0.53

### In vitro studies

TgVole (1x) Not tested

Campbell's dwarf hamster Not tested

### In vivo studies

TgVole (1x) Not tested

Campbell's dwarf hamster Not tested

pLDDT [86.06]

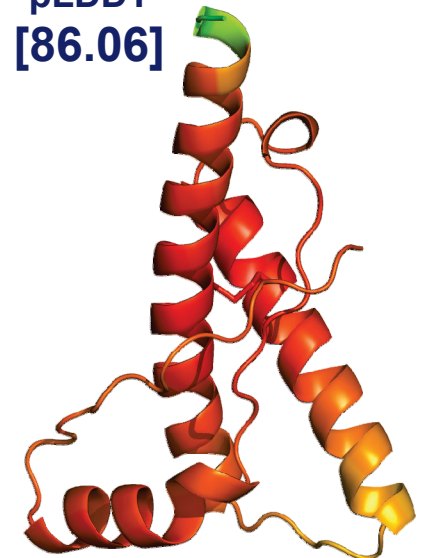

# Russian hamster

GenBank: EU886368

## *Phodopus sungorus*

Rodentia 81/101  
Cricetidae 25/27

P100%

100



100

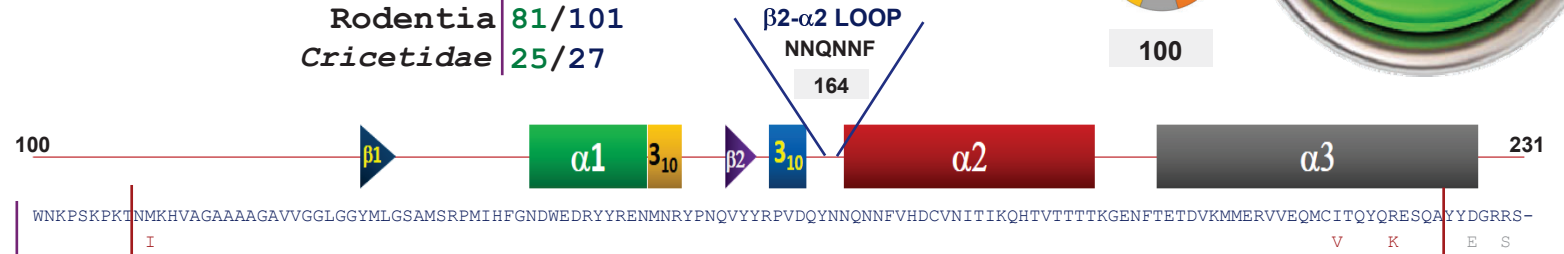

PrP sequence differs by 3 amino acids from the bank vole PrP (see in red)

No deletions  
No insertions  
No polymorphic variants found

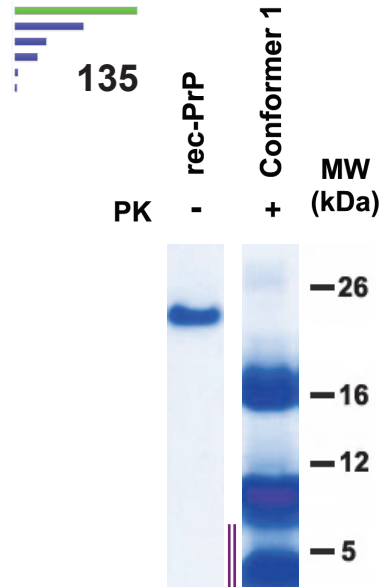

211 AA

1

Conformers



Tm<sup>Exp</sup>: ND

ΔΔG: -1.18

### *In vitro* studies

TgVole (1x) Propagate

Russian hamster Propagate

### *In vivo* studies

TgVole (1x) Infectious

Russian hamster Not tested

pLDDT [86.4]

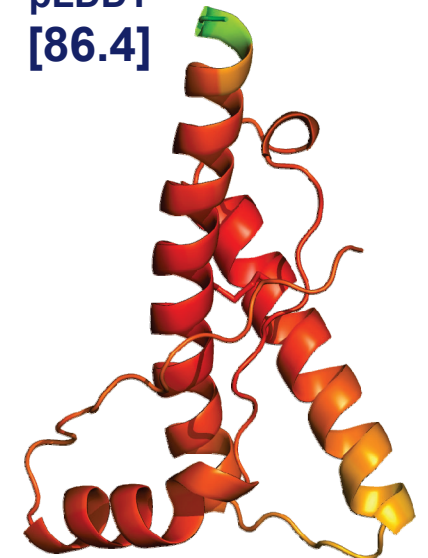

Distinct primary sequence across species

Distinct primary sequence across species

# Fat sand rat

GenBank: **BK063966**

## *Psammomys obesus*

Rodentia **81/101**  
Muridae **16/18**

**P83%**

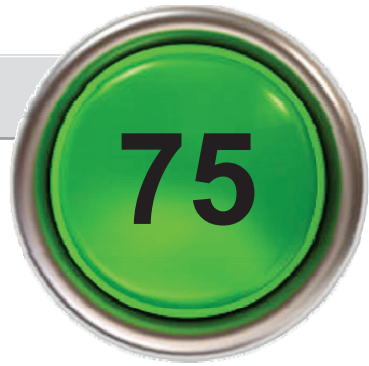

70-80

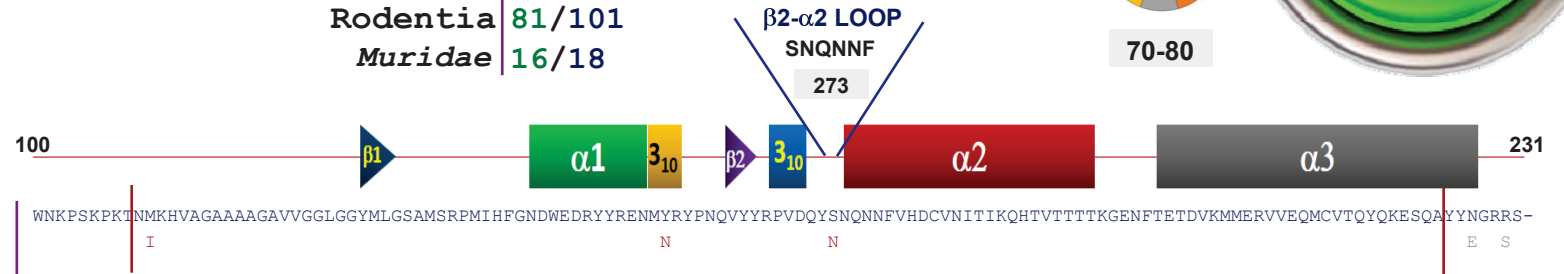

PrP sequence differs by 3 amino acids from the bank vole PrP (see in red)

No deletions  
No insertions  
No polymorphic variants found

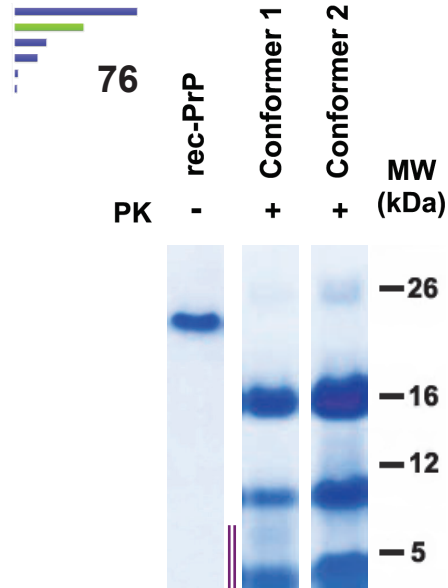

210 AA

**2**  
Conformers

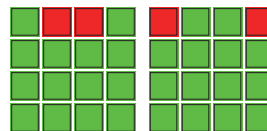

Tm<sup>Exp</sup>: ND

ΔΔG: **1.23**

### *In vitro* studies

TgVole (1x) Not tested  
Fat sand rat Not tested

### *In vivo* studies

TgVole (1x) Not tested  
Fat sand rat Not tested

pLDDT  
**[86.15]**

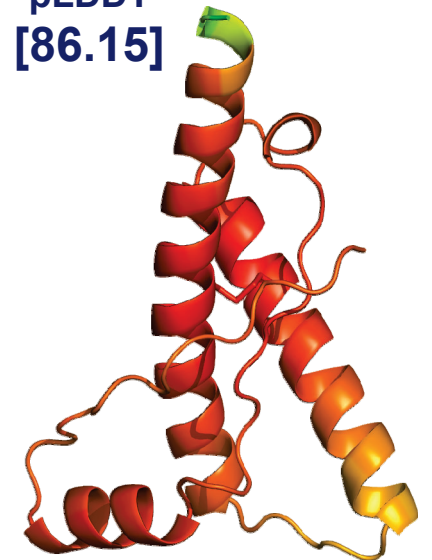

# Ricefield rat

GenBank: KF466955

P50%

16.1



10-20

## *Rattus argentiventer*

Rodentia 81/101  
Muridae 16/18

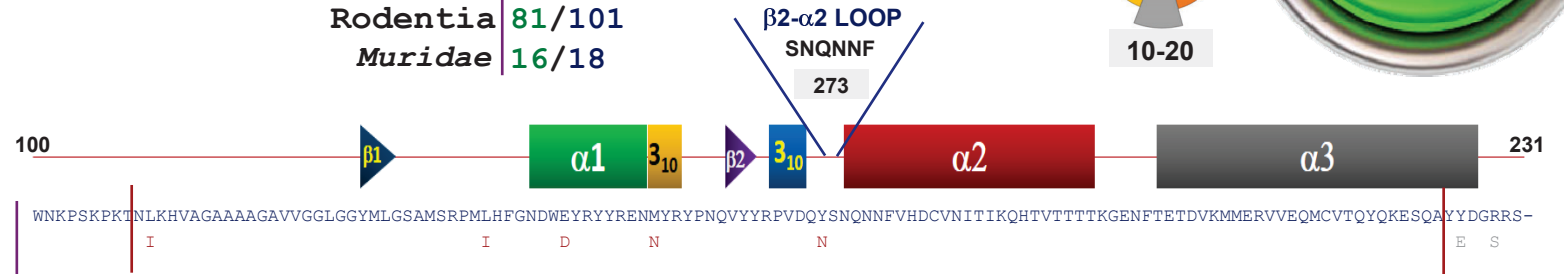

PrP sequence differs by 5 amino acids from the bank vole PrP (see in red)

No deletions  
No insertions  
No polymorphic variants found

Distinct primary sequence across species

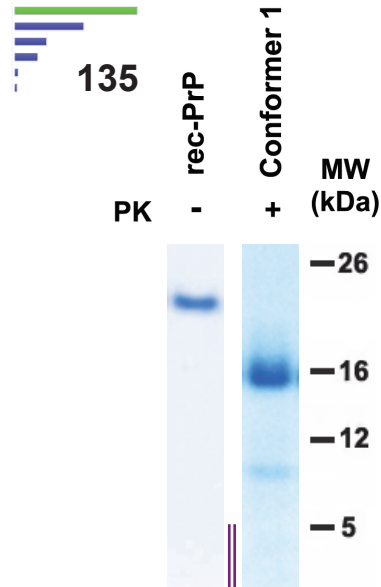

211 AA

1  
Conformers

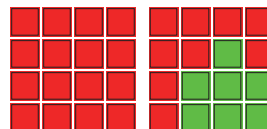

Tm<sup>Exp</sup>: ND

ΔΔG: -12.39

### *In vitro* studies

TgVole (1x) Not tested

Ricefield rat Not tested

### *In vivo* studies

TgVole (1x) Not tested

Ricefield rat Not tested

pLDDT [87.27]

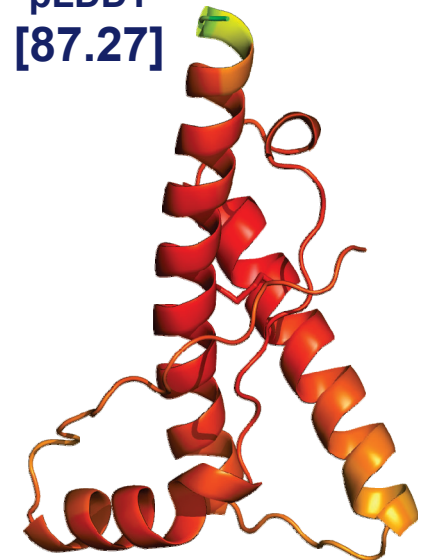

# Brown rat

GenBank: **BK063913**

P100%

100



100

## *Rattus norvegicus*

Rodentia 81/101  
Muridae 16/18

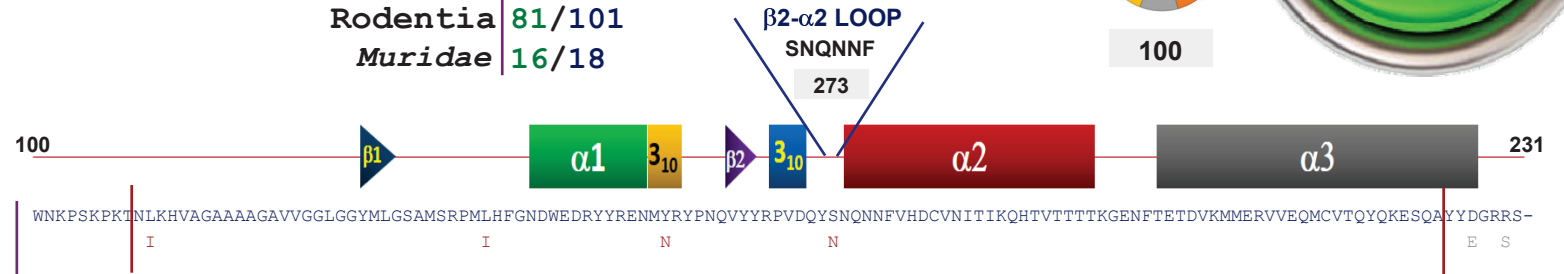

PrP sequence differs by 4 amino acids from the bank vole PrP (see in red)

No deletions  
No insertions  
No polymorphic variants found

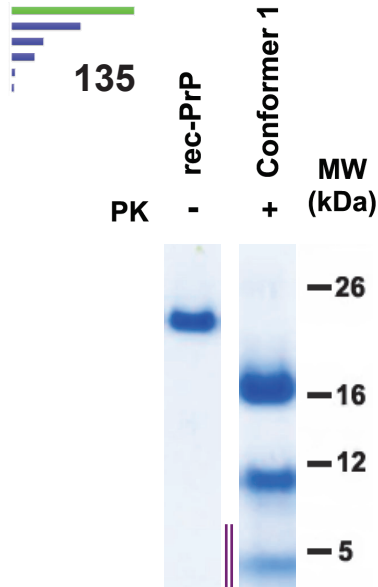

211 AA

1

Conformers



Tm<sup>Exp</sup>: 68.1 °C

ΔΔG: -6.76

### *In vitro* studies

TgVole (1x) Propagate

Rat Propagate

### *In vivo* studies

TgVole (1x) Infectious

Rat Not tested

pLDDT [86]

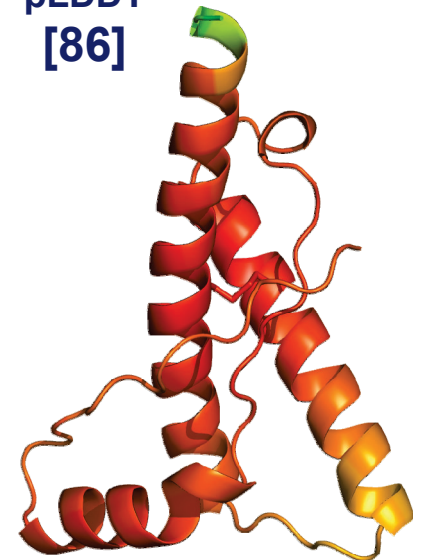

4 species sharing the same primary sequence

- Lesser ricefield rat *Rattus losea*
- Himalayan field rat *Rattus nitidus*
- Rat *Rattus rattus*
- Tanezumi rat *Rattus tanezumi*



# Mesic four-striped grass rat

GenBank: **BK064164**

## *Rhabdomys dilectus*

Rodentia **81/101**  
Muridae **16/18**

P67%

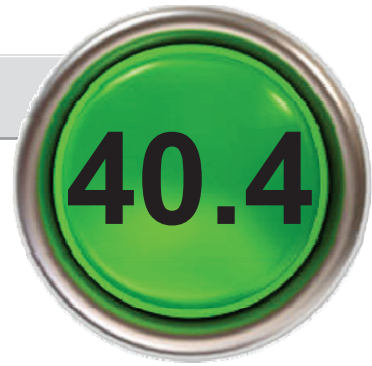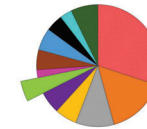

40-50

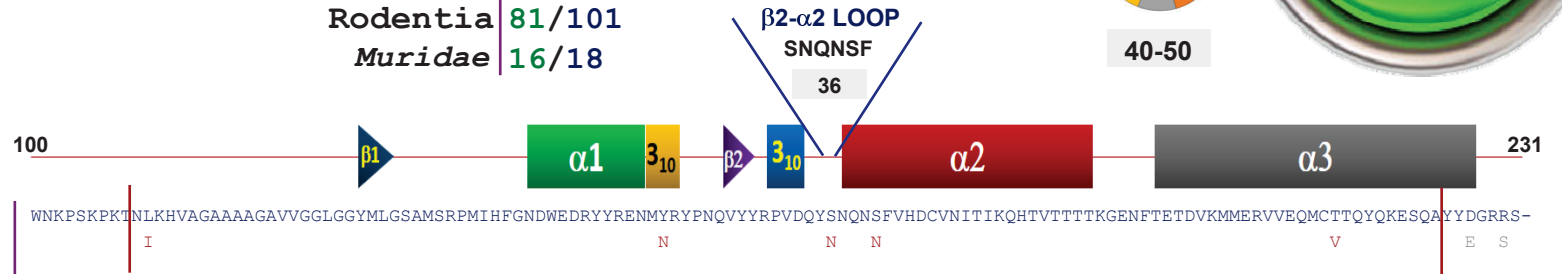

PrP sequence differs by 5 amino acids from the bank vole PrP (see in red)

No deletions  
No insertions  
No polymorphic variants found

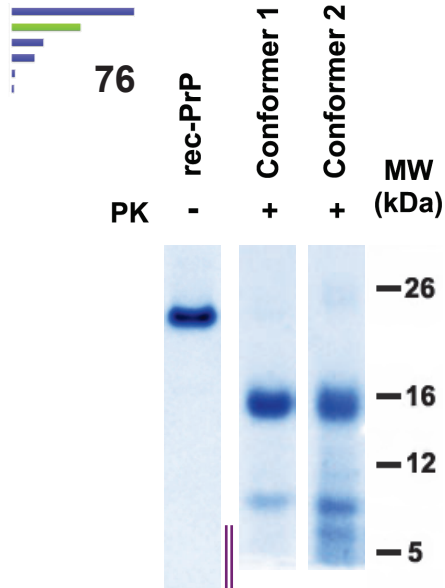

211 AA

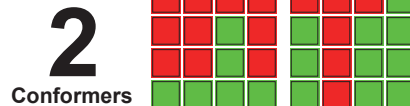

Tm<sup>Exp</sup>: ND

$\Delta\Delta G$ : -4.89

### *In vitro* studies

TgVole (1x) Not tested

Mesic four-striped grass rat Not tested

### *In vivo* studies

TgVole (1x) Not tested

Mesic four-striped grass rat Not tested

pLDDT  
[86.05]

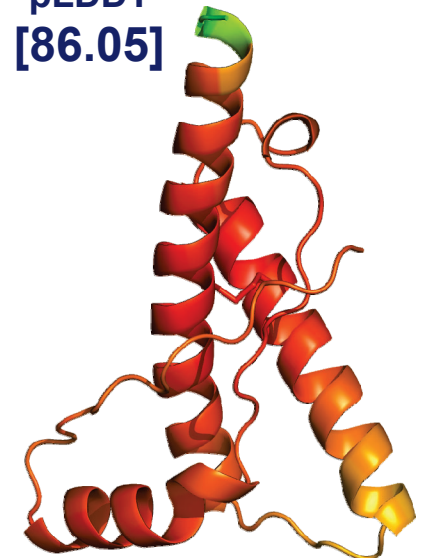

1 species sharing the same primary sequence

Four-striped grass mouse  
*Rhabdomys pumilio*

# Hoary bamboo rat

GenBank: **BK063999**

*Rhizomys pruinosus*

Rodentia 81/101  
Spalacidae 3/3

P89%

87.5

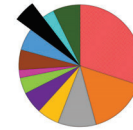

80-90

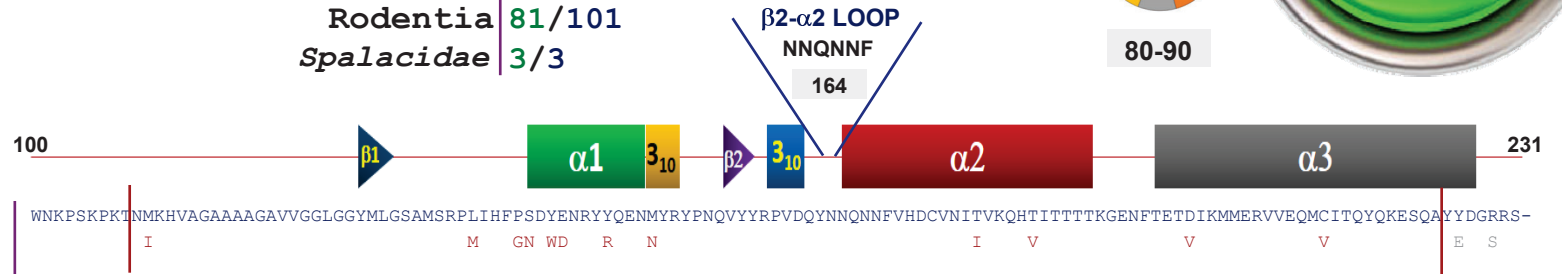

PrP sequence differs by 12 amino acids from the bank vole PrP (see in red)

No deletions  
No insertions  
No polymorphic variants found

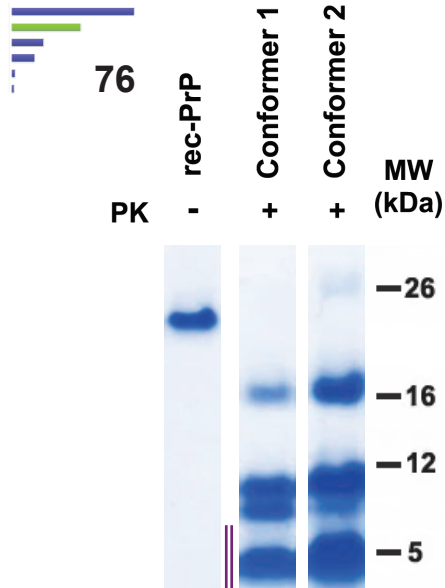

212 AA

2 Conformers

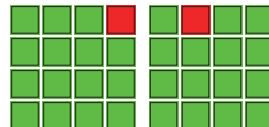

Tm<sup>Exp</sup>: ND

ΔΔG: -9.79

*In vitro* studies

TgVole (1x) Not tested  
Hoary bamboo rat Not tested

*In vivo* studies

TgVole (1x) Not tested  
Hoary bamboo rat Not tested

pLDDT [86.2]

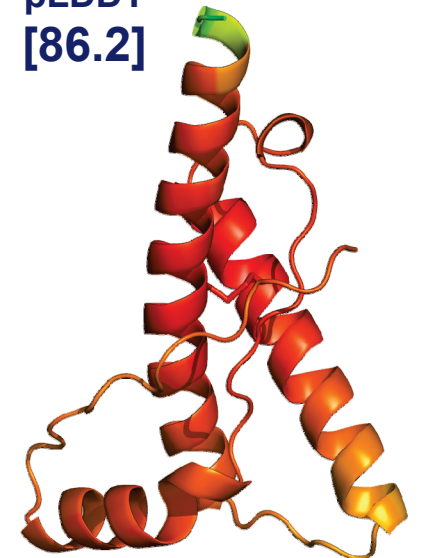

Distinct primary sequence across species

# Mount Data shrew-rat

GenBank: **BK064163**

P77%

67.5



60-70

## *Rhynchomys soricoides*

Rodentia 81/101  
Muridae 16/18

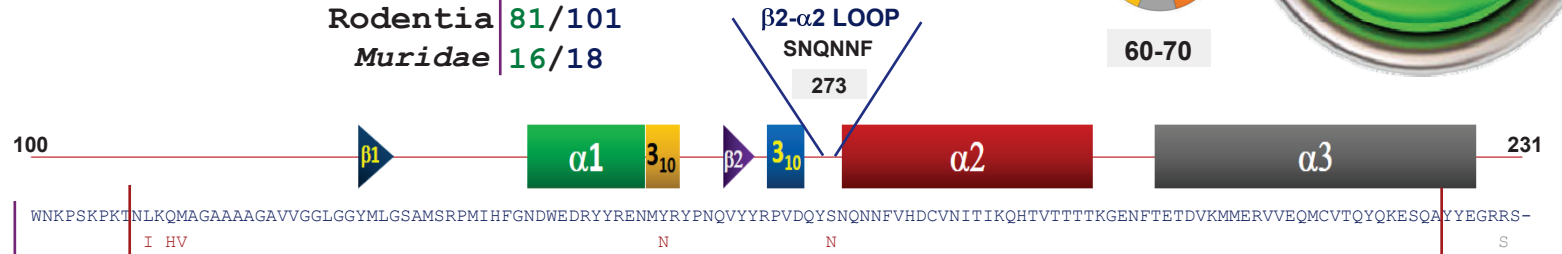

PrP sequence differs by 5 amino acids from the bank vole PrP (see in red)

No deletions  
No insertions  
No polymorphic variants found

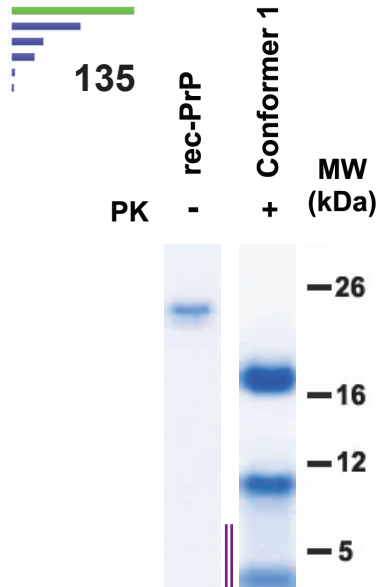

211 AA

1  
Conformers

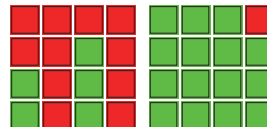

Tm<sup>Exp</sup>: ND

ΔΔG: -6.81

### *In vitro* studies

TgVole (1x) Not tested

Mount Data shrew-rat Not tested

### *In vivo* studies

TgVole (1x) Not tested

Mount Data shrew-rat Not tested

pLDDT  
[86.02]

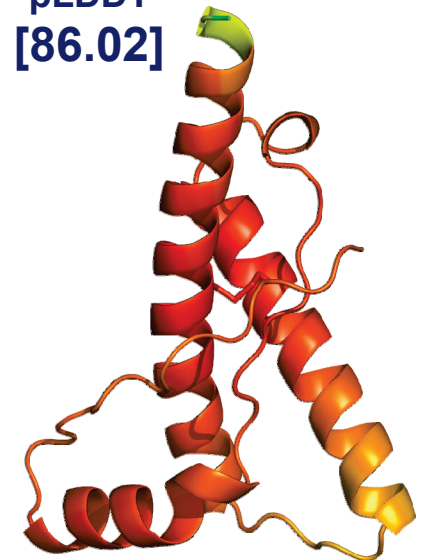

Distinct primary sequence across species

# Paulina's limestone rat

GenBank: KF466958

## *Saxatilomys paulinae*

Rodentia 81/101  
Muridae 16/18

P100%



100

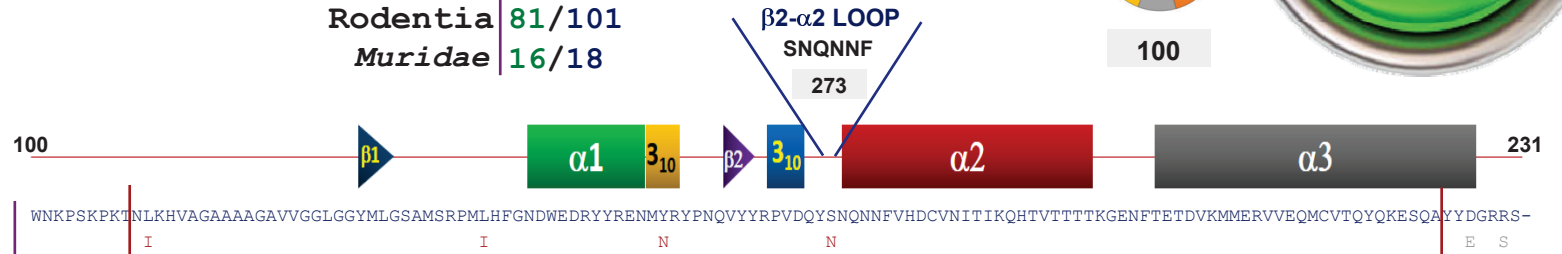

PrP sequence differs by 4 amino acids from the bank vole PrP (see in red)

No deletions  
No insertions  
No polymorphic variants found

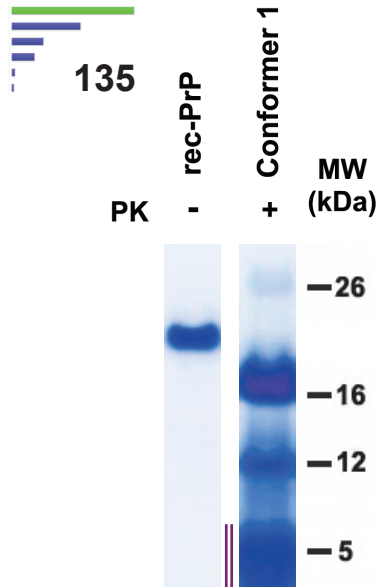

201 AA

1

Conformers



Tm<sup>Exp</sup>: ND

ΔΔG: -10.57

### *In vitro* studies

TgVole (1x) Not tested  
Paulina's limestone rat Not tested

### *In vivo* studies

TgVole (1x) Not tested  
Paulina's limestone rat Not tested

pLDDT [86.57]

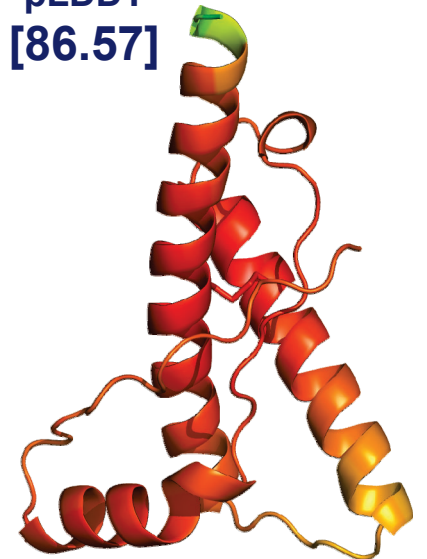

Distinct primary sequence across species

# Eastern gray squirrel

GenBank: **BK064159**

P69%

44.6

## *Sciurus carolinensis*

Rodentia 81/101  
 Sciuridae 7/13



40-50

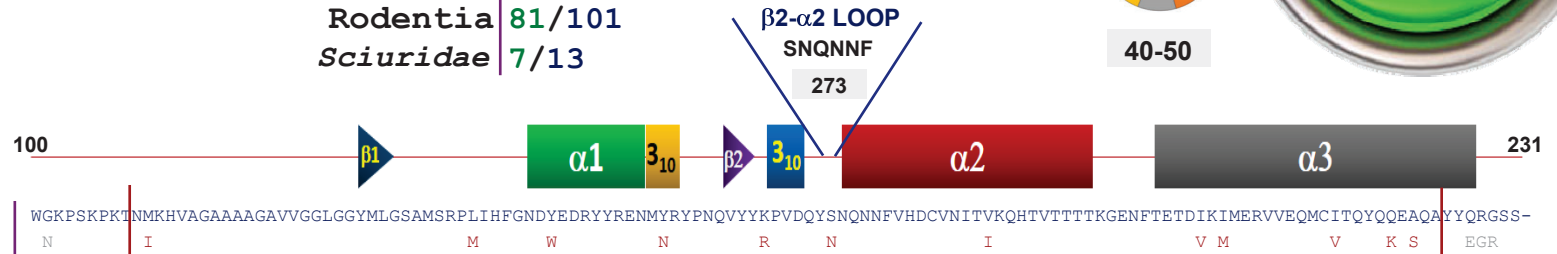

PrP sequence differs by 12 amino acids from the bank vole PrP (see in red)

- No deletions
- No insertions
- No polymorphic variants found

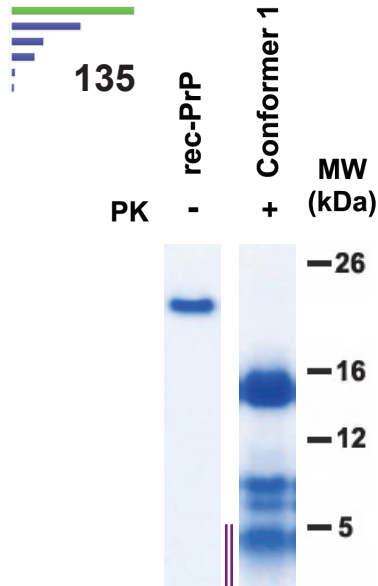

213 AA

1  
 Conformers

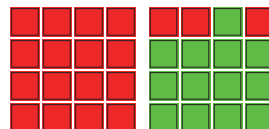

Tm<sup>Exp</sup>: ND

ΔΔG: -14.31

### *In vitro* studies

TgVole (1x) Not tested

Eastern gray squirrel Not tested

### *In vivo* studies

TgVole (1x) Not tested

Eastern gray squirrel Not tested

pLDDT [84.98]

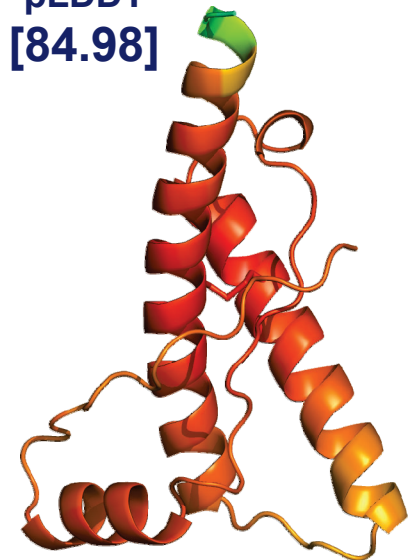

1 species sharing the same primary sequence

Fox squirrel  
*Sciurus niger*

# Guayaquil squirrel

GenBank: KM357836

P71%

48.2



40-50

## Sciurus stramineus

Rodentia 81/101  
Sciuridae 7/13

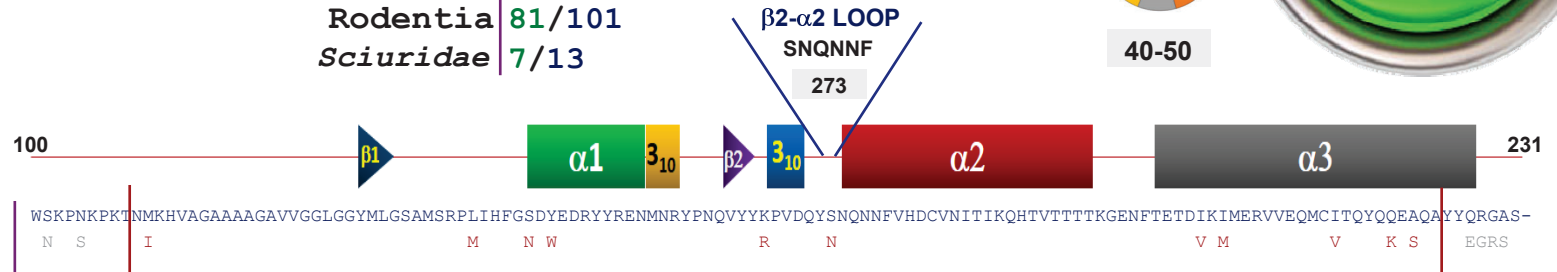

PrP sequence differs by 11 amino acids from the bank vole PrP (see in red)

No deletions  
No insertions  
No polymorphic variants found

Distinct primary sequence across species

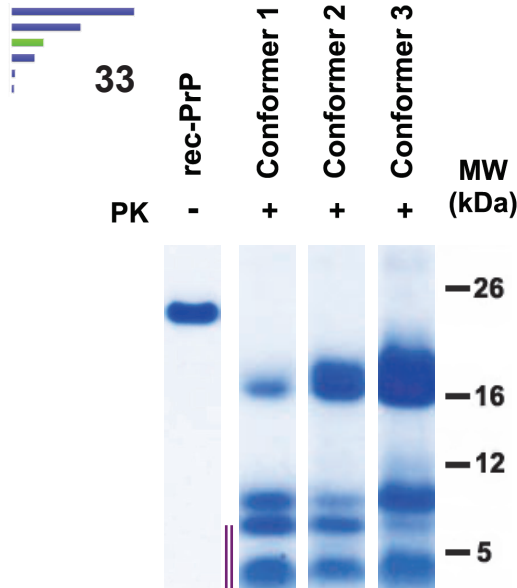

213 AA

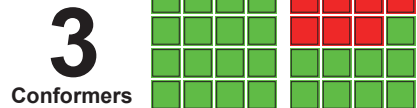

Tm<sup>Exp</sup>: ND

ΔΔG: -7.89

### In vitro studies

TgVole (1x) Not tested  
Guayaquil squirrel Not tested

### In vivo studies

TgVole (1x) Not tested  
Guayaquil squirrel Not tested

pLDDT [85.24]

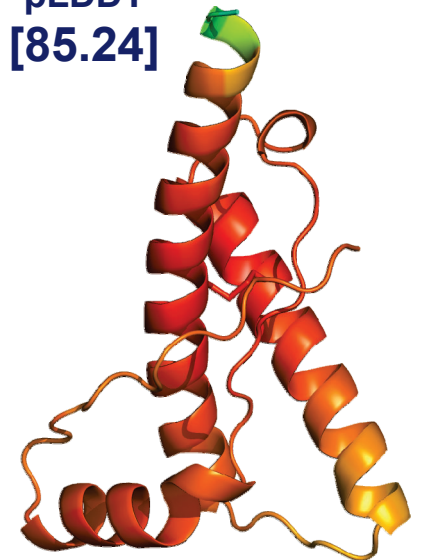

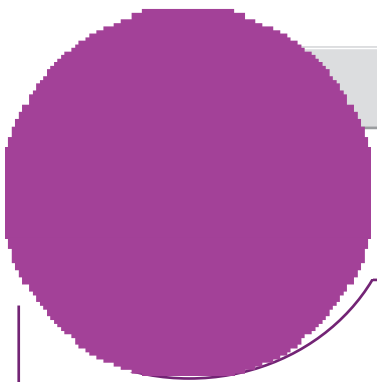

# Red squirrel

GenBank: AY133037

P53%

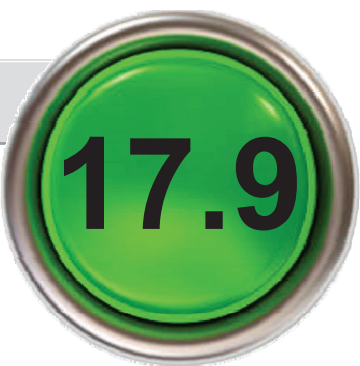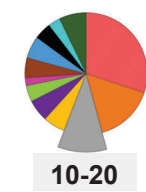

2 species sharing the same primary sequence

- Japanese squirrel *Sciurus lis*
- Cape ground squirrel *Xerus inauris*

## *Sciurus vulgaris*

Rodentia 81/101  
 Sciuridae 7/13

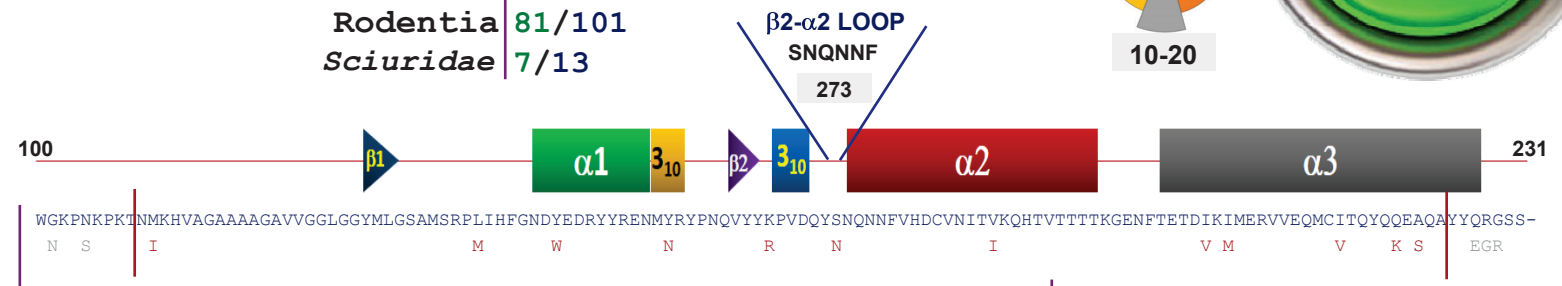

PrP sequence differs by 12 amino acids from the bank vole PrP (see in red)

- No deletions
- No insertions
- No polymorphic variants found

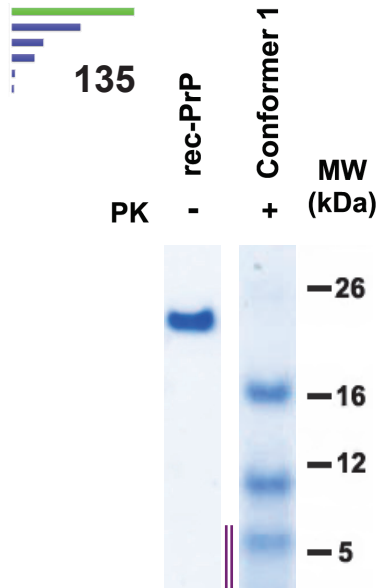

213 AA

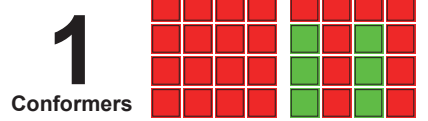

Tm<sup>Exp</sup>: ND  
 ΔΔG: -15.13

### *In vitro* studies

- TgVole (1x) Not tested
- Red squirrel Not tested

### *In vivo* studies

- TgVole (1x) Not tested
- Red squirrel Not tested

pLDDT [87.73]

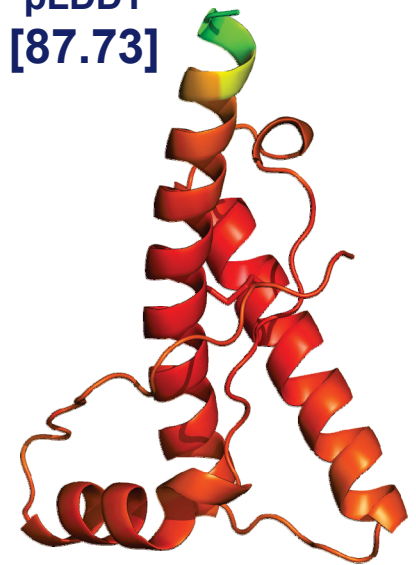

# Tawny-bellied cotton rat

GenBank: AF117324

P83%

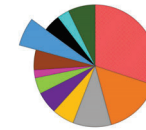

70-80

## *Sigmodon fulviventer*

Rodentia 81/101  
Cricetidae 25/27

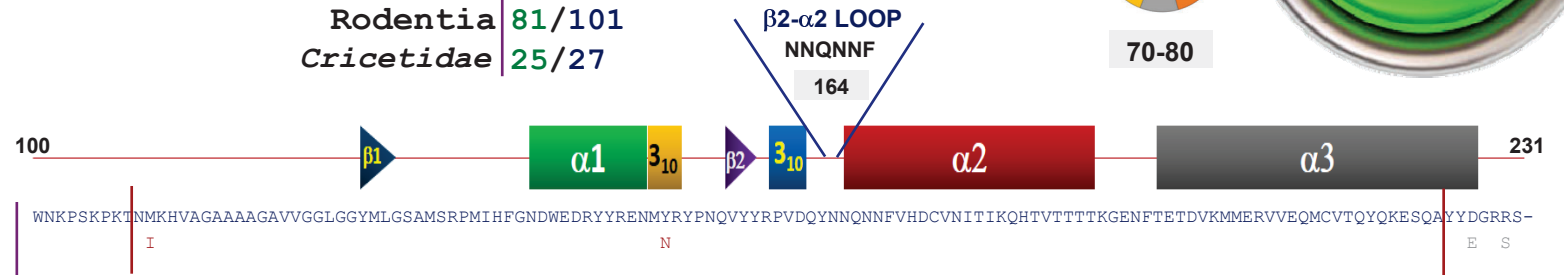

PrP sequence differs by 2 amino acids from the bank vole PrP (see in red)

No deletions  
No insertions  
No polymorphic variants found

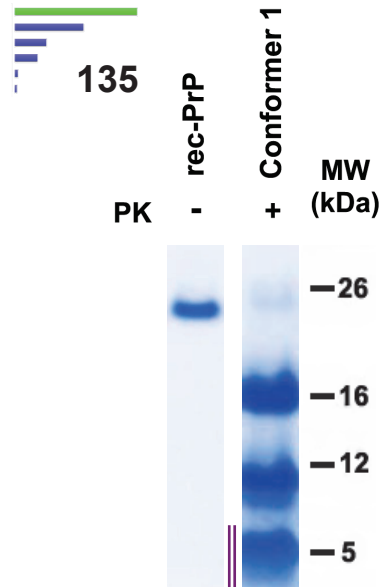

211 AA

1  
Conformers

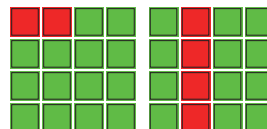

Tm<sup>Exp</sup>: ND

ΔΔG: -0.82

### *In vitro* studies

TgVole (1x) Not tested

Tawny-bellied cotton rat Not tested

### *In vivo* studies

TgVole (1x) Not tested

Tawny-bellied cotton rat Not tested

pLDDT  
[85.88]

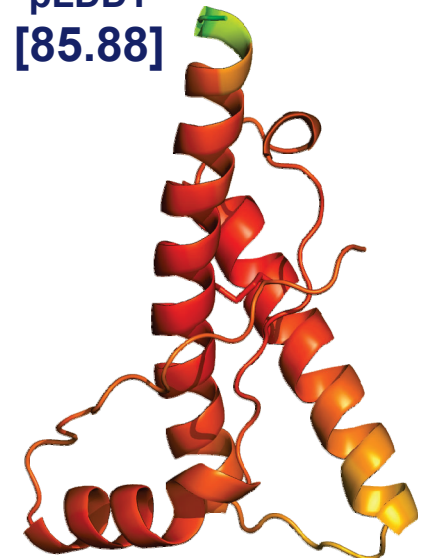

1 species sharing the same primary sequence

Hispid cotton rat  
*Sigmodon hispidus*



Distinct primary sequence across species

# Upper Galilee Mountains blind mole-rat

GenBank: XM\_008835893

P84%

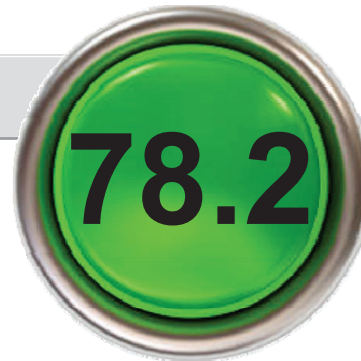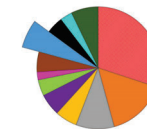

70-80

## Spalax galili

Rodentia 81/101

Spalacidae 3/3

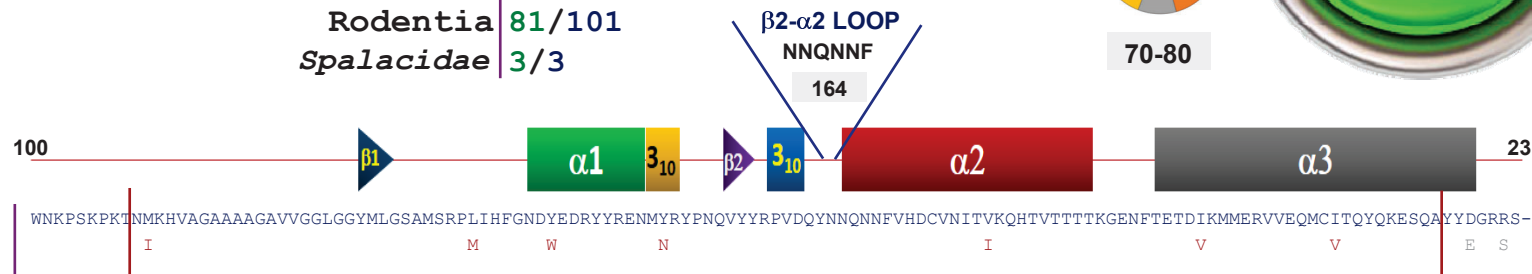

PrP sequence differs by 7 amino acids from the bank vole PrP (see in red)

- No deletions
- No insertions
- No polymorphic variants found

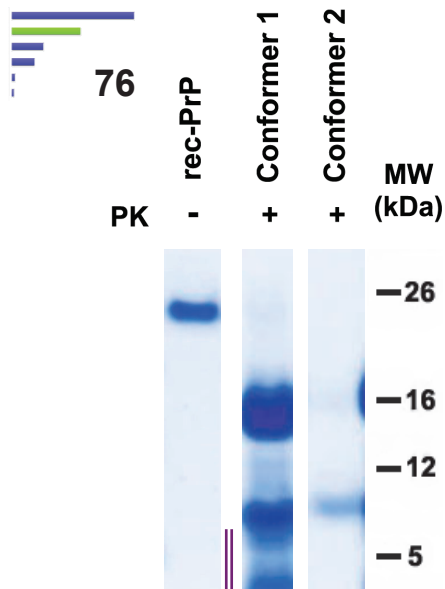

213 AA

2 Conformers

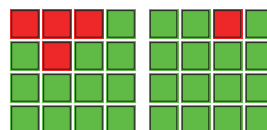

Tm<sup>Exp</sup>: ND

ΔΔG: -10.9

### In vitro studies

TgVole (1x) Not tested

Upper Galilee Mountains blind Not tested

### In vivo studies

TgVole (1x) Not tested

Upper Galilee Mountains blind Not tested

pLDDT [86.29]

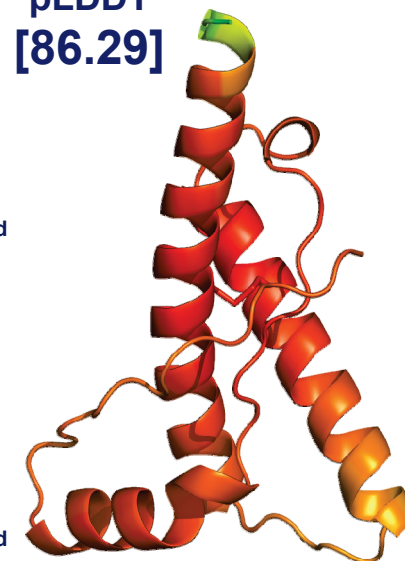

# California ground squirrel

GenBank: **BK064192**

**P31%**

**0.4**

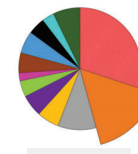

0-10

## *Spermophilus beecheyi*

Rodentia **81/101**  
 Sciuridae **7/13**

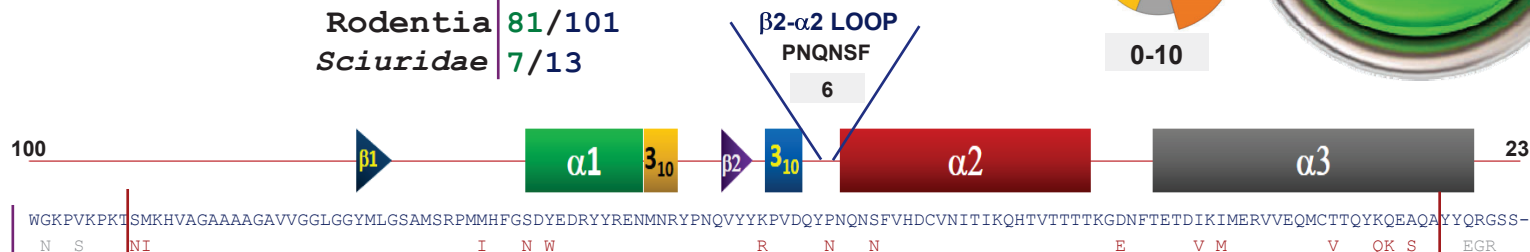

PrP sequence differs by 15 amino acids from the bank vole PrP (see in red)

- No deletions
- No insertions
- No polymorphic variants found

Distinct primary sequence across species

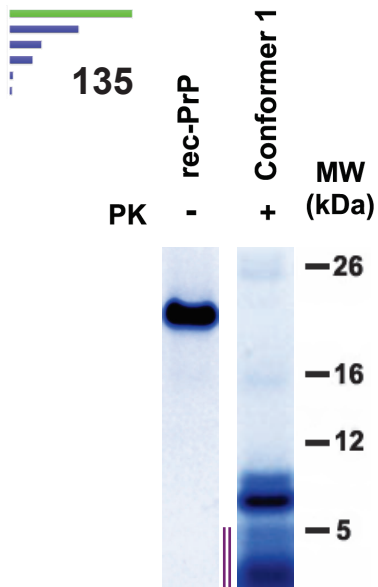

204 AA

**1**  
 Conformers

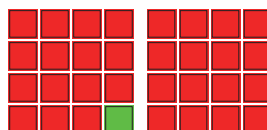

$T_m^{Exp}$ : ND

$\Delta\Delta G$ : **-11.31**

### *In vitro* studies

- TgVole (1x) Not tested
- California ground squirrel Not tested

### *In vivo* studies

- TgVole (1x) Not tested
- California ground squirrel Not tested

pLDDT  
**[87.08]**

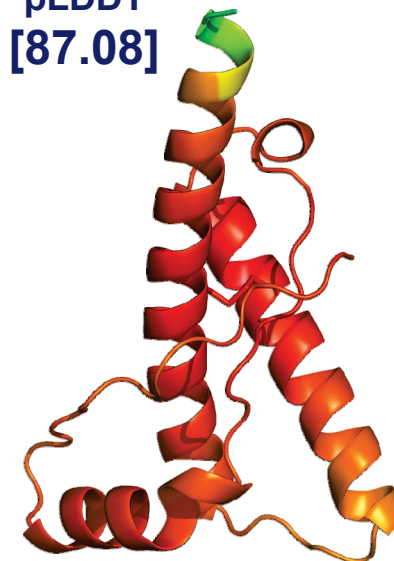

# Daurian ground squirrel

GenBank: **BK063919**

P29%



## *Spermophilus dauricus*

Rodentia 81/101  
Sciuridae 7/13

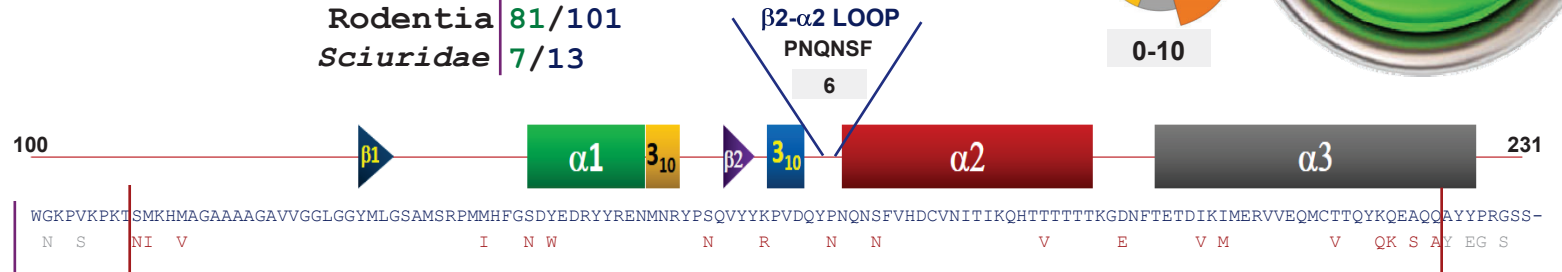

PrP sequence differs by 19 amino acids from the bank vole PrP (see in red)

- No deletions
- No insertions
- No polymorphic variants found

Distinct primary sequence across species

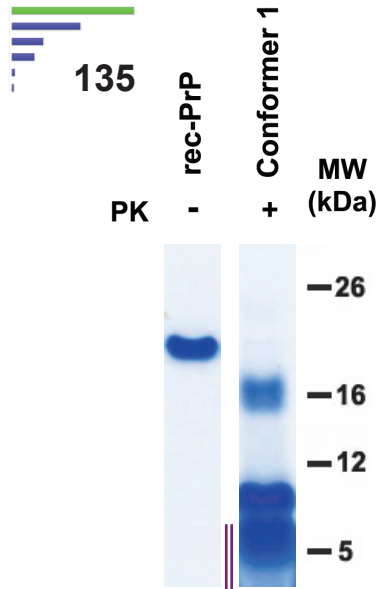

135

197 AA

1  
Conformers

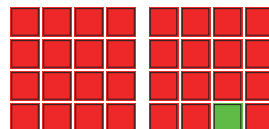

Tm<sup>Exp</sup>: ND  
ΔΔG: ND

### *In vitro* studies

TgVole (1x) Not tested  
Daurian ground squirrel Not tested

### *In vivo* studies

TgVole (1x) Not tested  
Daurian ground squirrel Not tested

pLDDT  
[85.23]

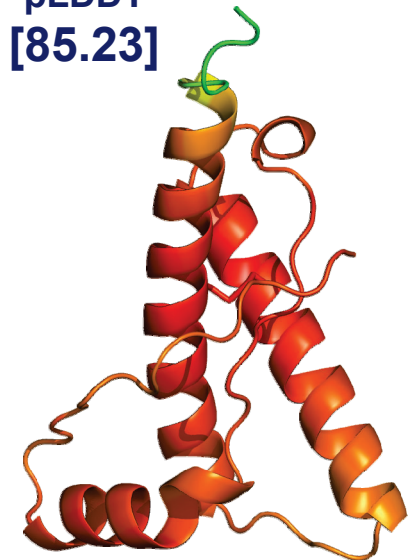

# Arctic ground squirrel

GenBank: XM\_026385776

P29%



0

## *Spermophilus parryii*

Rodentia 81/101  
Sciuridae 7/13

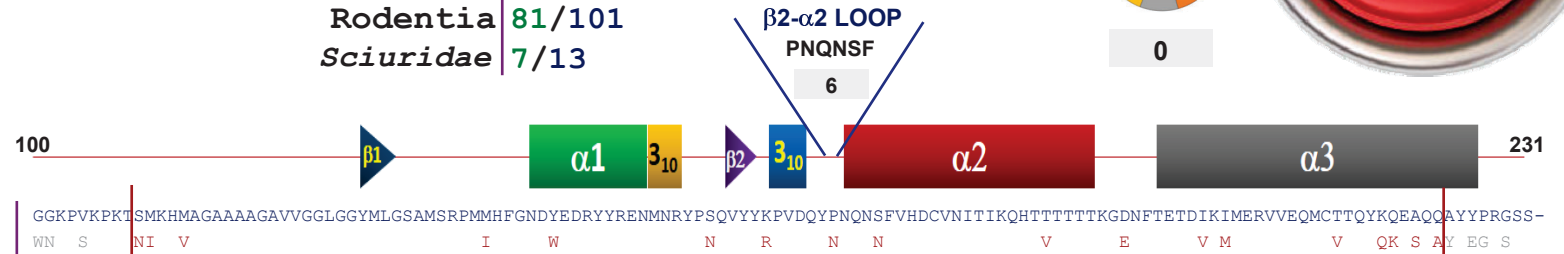

PrP sequence differs by 18 amino acids from the bank vole PrP (see in red)

- No deletions
- No insertions
- No polymorphic variants found

T<sub>m</sub><sup>Exp</sup>: ND  
 $\Delta\Delta G$ : ND

Distinct primary sequence across species

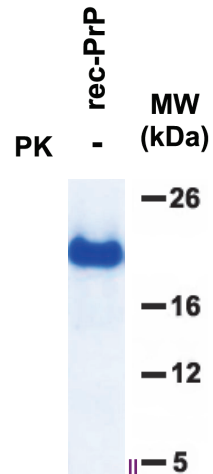

207 AA

0  
Conformers

NO  
MISFOLDING

*In vitro* studies

NOT  
APPLICABLE

*In vivo* studies

NOT  
APPLICABLE

pLDDT  
[84.73]

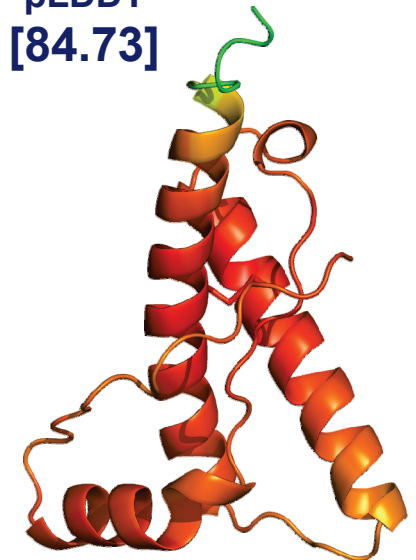

2 species sharing the same primary sequence

- Gunnison's prairie dog *Cynomys gunnisoni*
- Black-tailed prairie dog *Cynomys ludovicianus*

# Thirteen-lined ground squirrel

GenBank: XM\_005320503

## *Spermophilus tridecemlineatus*

Rodentia 81/101  
 Sciuridae 7/13

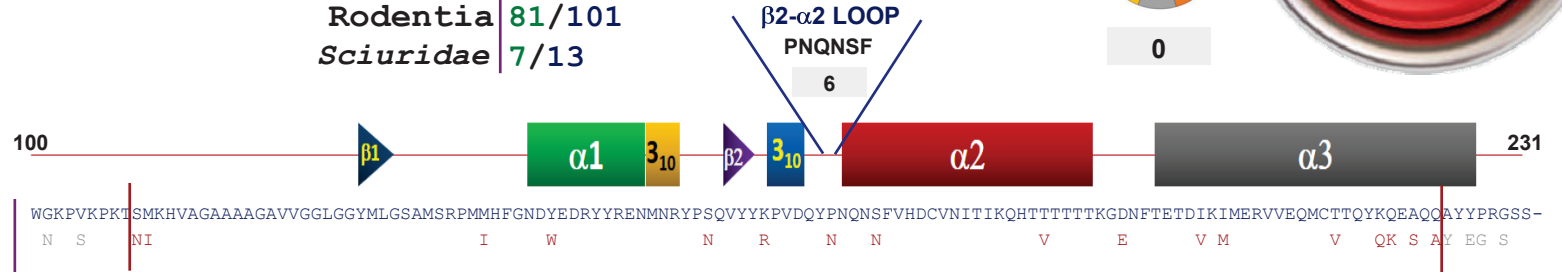

PrP sequence differs by 17 amino acids from the bank vole PrP (see in red)

- No deletions
- No insertions
- No polymorphic variants found

T<sub>m</sub><sup>Exp</sup>: ND  
 ΔΔG: ND

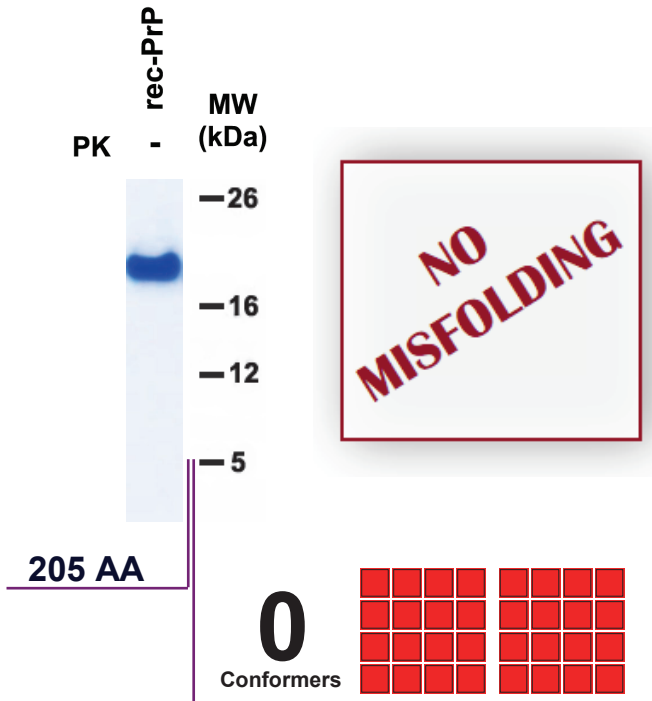

*In vitro* studies

NOT APPLICABLE

*In vivo* studies

NOT APPLICABLE

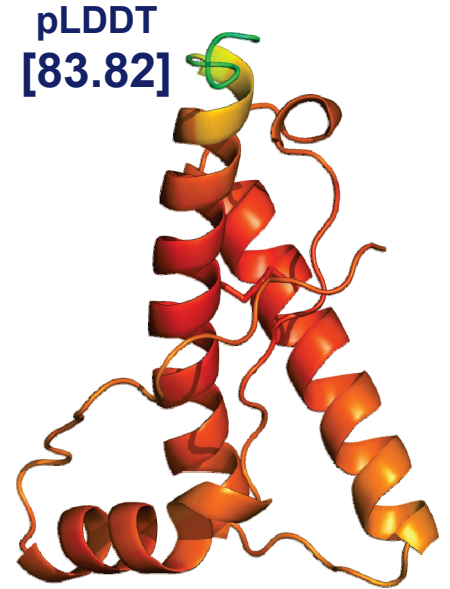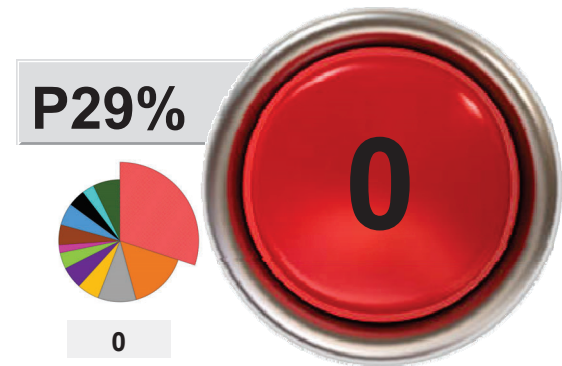

# Siberian chipmunk

GenBank: **BK064209**

P29%



0

## Tamias sibiricus

Rodentia **81/101**  
Sciuridae **7/13**

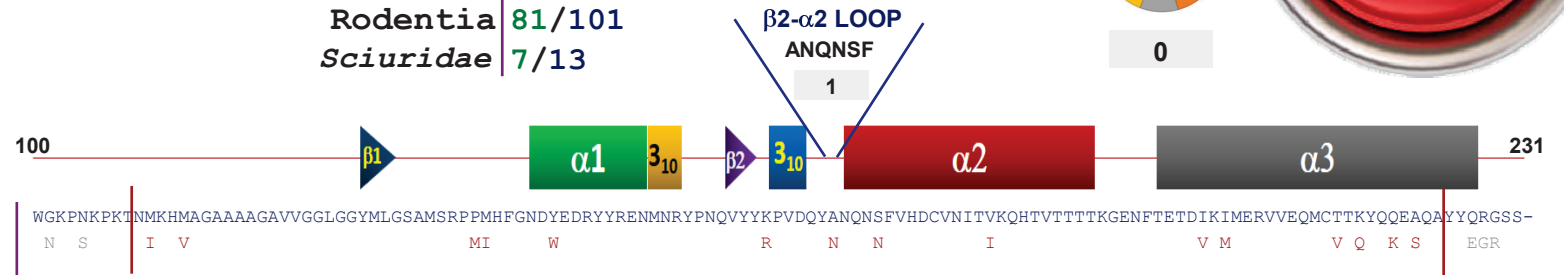

PrP sequence differs by 15 amino acids from the bank vole PrP (see in red)

No deletions  
No insertions  
No polymorphic variants found

Tm<sup>Exp</sup>: ND

ΔΔG: **-11.42**

Distinct primary sequence across species

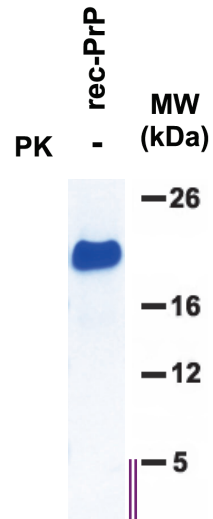

205 AA

**0**  
Conformers

**NO MISFOLDING**

*In vitro* studies

**NOT APPLICABLE**

*In vivo* studies

**NOT APPLICABLE**

pLDDT [93.27]

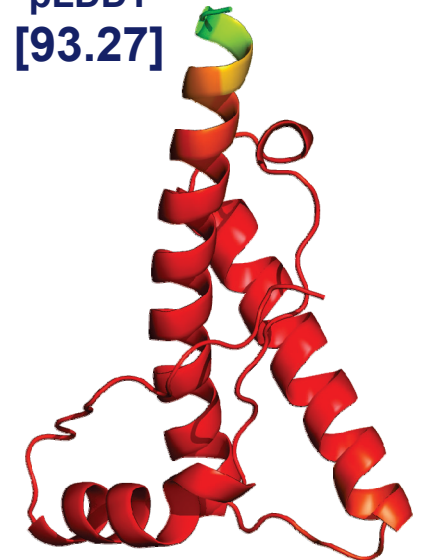

# Botta's pocket gopher

GenBank: **BK064206**

P81%

71.4



70-80

## *Thomomys bottae*

Rodentia 81/101  
Geomyidae 1/1

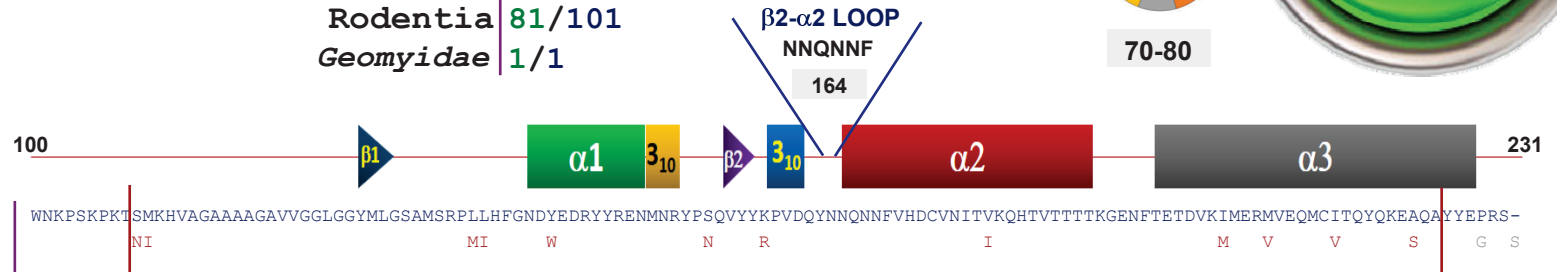

PrP sequence differs by 12 amino acids from the bank vole PrP (see in red)

- No deletions
- No insertions
- No polymorphic variants found

Distinct primary sequence across species

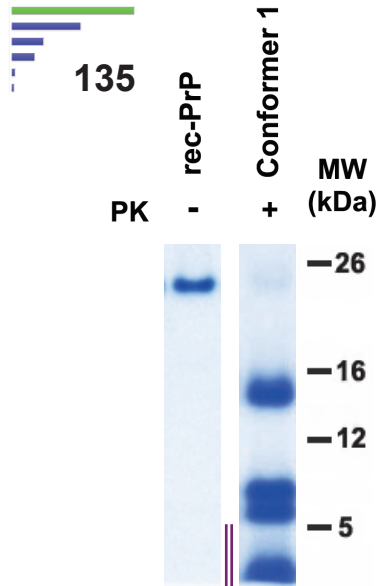

219 AA

1  
Conformers

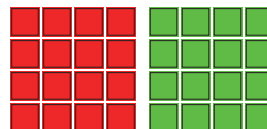

Tm<sup>Exp</sup>: ND  
ΔΔG: ND

### *In vitro* studies

- TgVole (1x) Not tested
- Botta's pocket gopher Not tested

### *In vivo* studies

- TgVole (1x) Not tested
- Botta's pocket gopher Not tested

pLDDT [87.29]

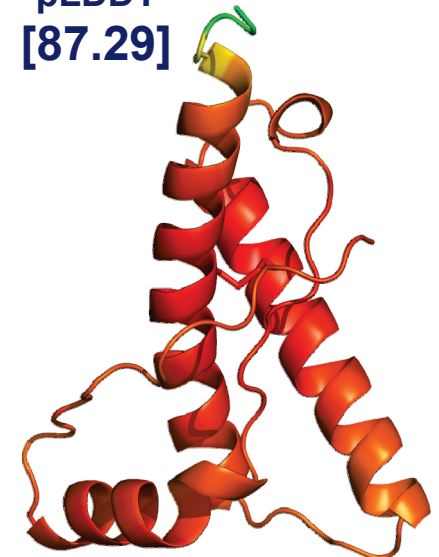

Distinct primary sequence across species

# Greater cane rat

GenBank: **BK064162**

P79%

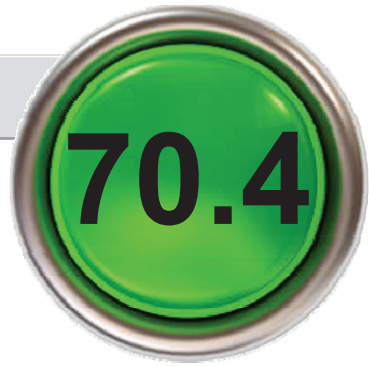

70-80

## *Thryonomys swinderianus*

Rodentia 81/101  
Thryomyidae 1/1

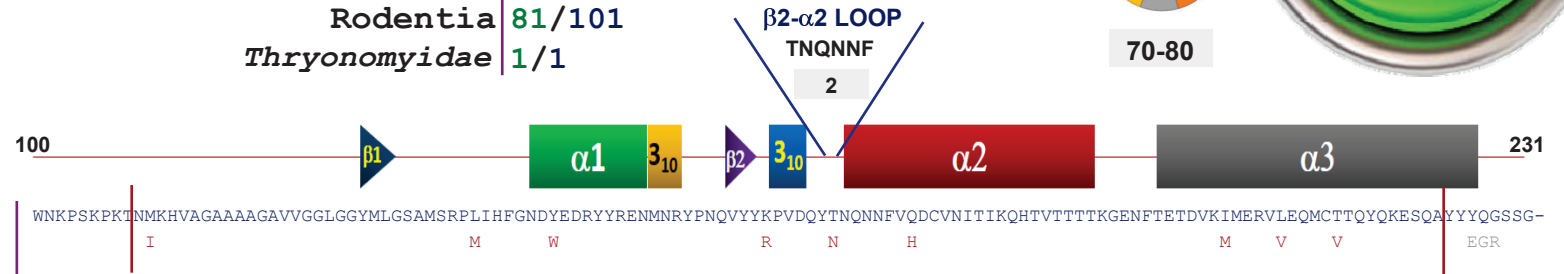

PrP sequence differs by 9 amino acids from the bank vole PrP (see in red)

No deletions  
No insertions  
No polymorphic variants found

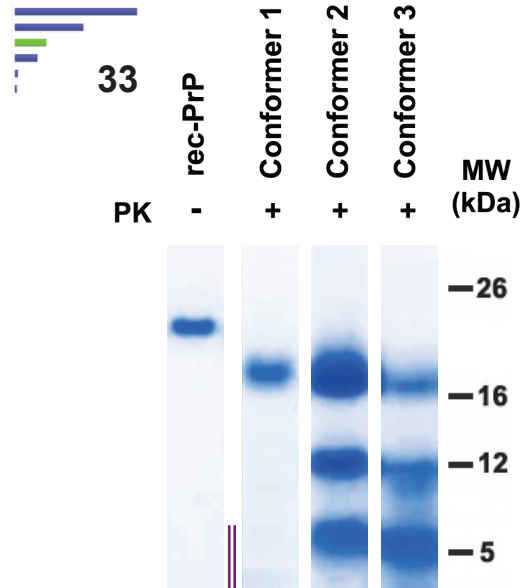

202 AA

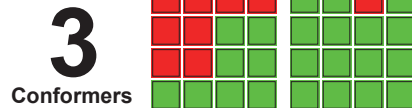

Tm<sup>Exp</sup>: ND  
ΔΔG: ND

### *In vitro* studies

TgVole (1x) Not tested  
Greater cane rat Not tested

### *In vivo* studies

TgVole (1x) Not tested  
Greater cane rat Not tested

pLDDT [83.92]

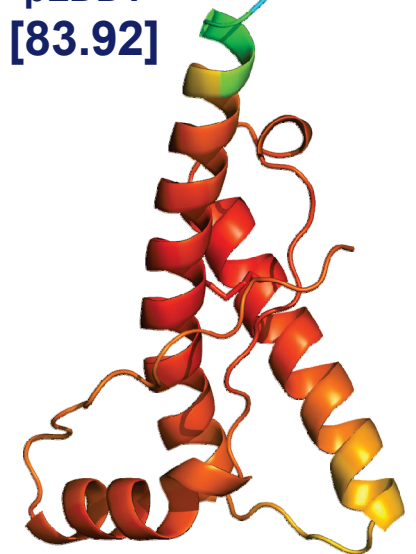



# Plains viscacha rat

GenBank: **BK064138**

P39%



0-10

## *Tympanoctomys barrerae*

Rodentia 81/101  
Octodontidae 3/3

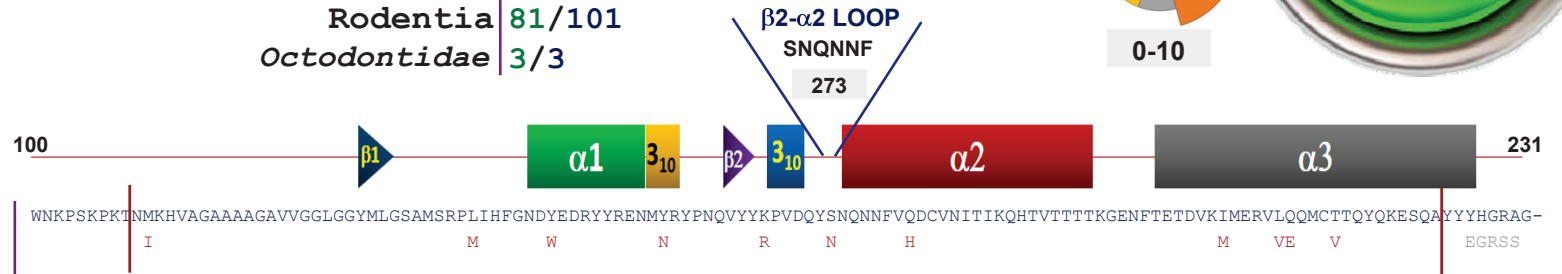

PrP sequence differs by 11 amino acids from the bank vole PrP (see in red)

No deletions  
No insertions  
No polymorphic variants found

Distinct primary sequence across species

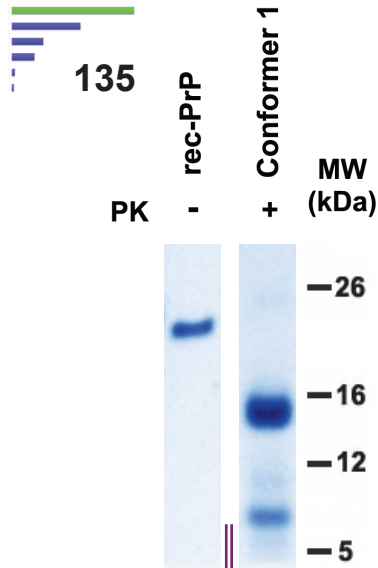

202 AA

**1**  
Conformers



T<sub>m</sub><sup>Exp</sup>: ND  
ΔΔG: ND

### *In vitro* studies

TgVole (1x) Not tested  
Plains viscacha rat Not tested

### *In vivo* studies

TgVole (1x) Not tested  
Plains viscacha rat Not tested

pLDDT  
[83.91]

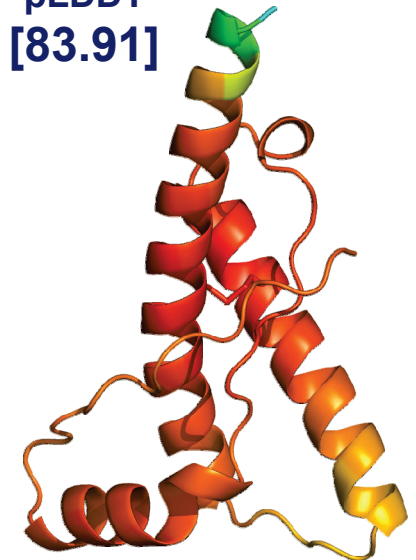

Distinct primary sequence across species

# Chinese pygmy dormouse

GenBank: **BK064190**

## *Typhlomys cinereus*

Rodentia **81/101**

Platacanthomyidae **1/1**

**P70%**



40-50

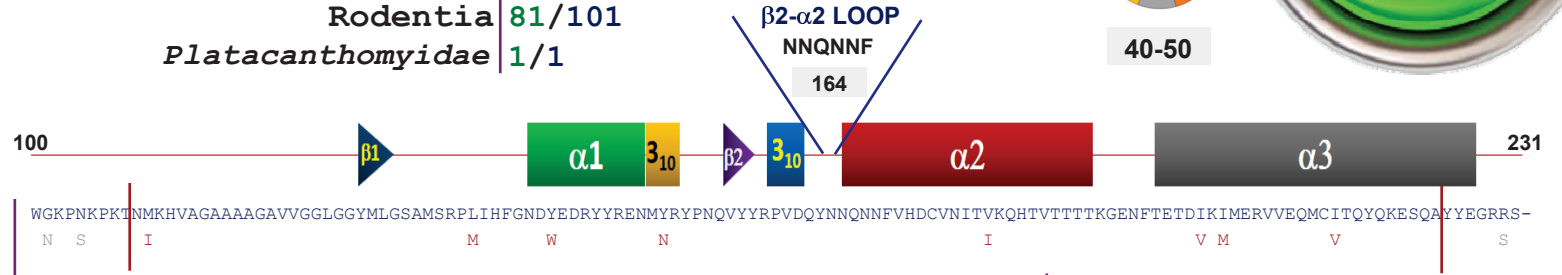

PrP sequence differs by 8 amino acids from the bank vole PrP (see in red)

- No deletions
- No insertions
- No polymorphic variants found

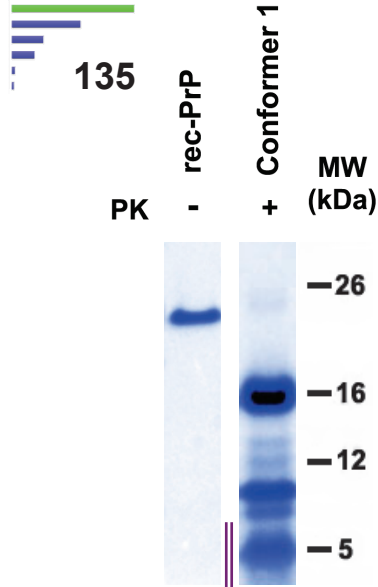

212 AA

**1**  
Conformers

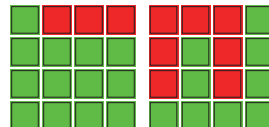

Tm<sup>Exp</sup>: ND

ΔΔG: **-13.72**

### *In vitro* studies

- TgVole (1x) Not tested
- Chinese pygmy dormouse Not tested

### *In vivo* studies

- TgVole (1x) Not tested
- Chinese pygmy dormouse Not tested

pLDDT  
**[85.95]**

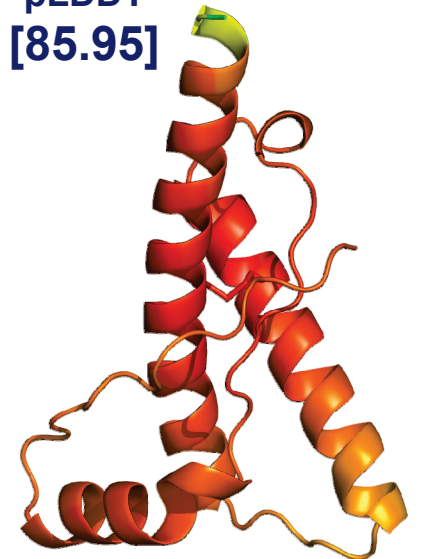

# Giant white-tailed rat

GenBank: **BK064806**

**P81%**

**71.4**



70-80

## *Uromys caudimaculatus*

Rodentia **81/101**  
Muridae **16/18**

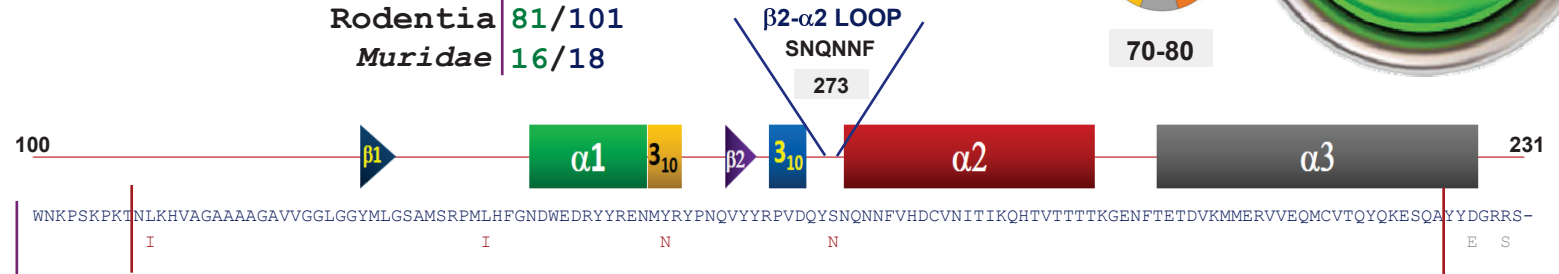

PrP sequence differs by 4 amino acids from the bank vole PrP (see in red)

No deletions  
No insertions  
No polymorphic variants found

Distinct primary sequence across species

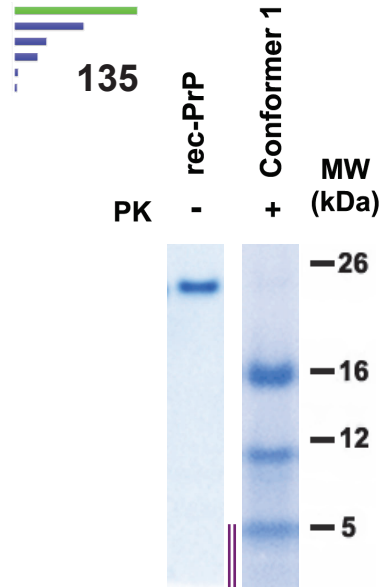

219 AA

**1**  
Conformers



$T_m^{Exp}$ : ND

$\Delta\Delta G$ : **-9.36**

### *In vitro* studies

TgVole (1x) Not tested

Giant white-tailed rat Not tested

### *In vivo* studies

TgVole (1x) Not tested

Giant white-tailed rat Not tested

pLDDT  
**[86.38]**

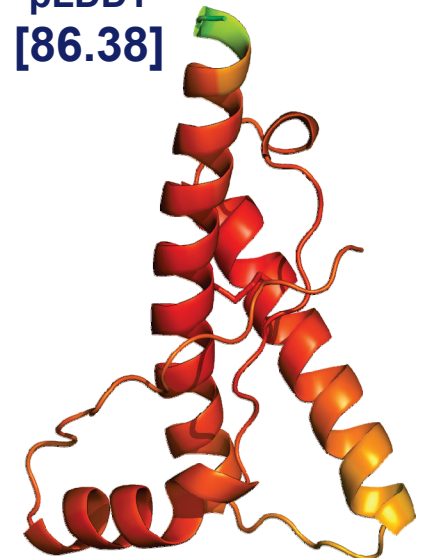

# Unstriped ground squirrel

GenBank: **BK064797**

P73%

**53.6**

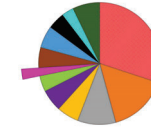

50-60

## *Xerus rutilus*

Rodentia **81/101**  
 Sciuridae **7/13**

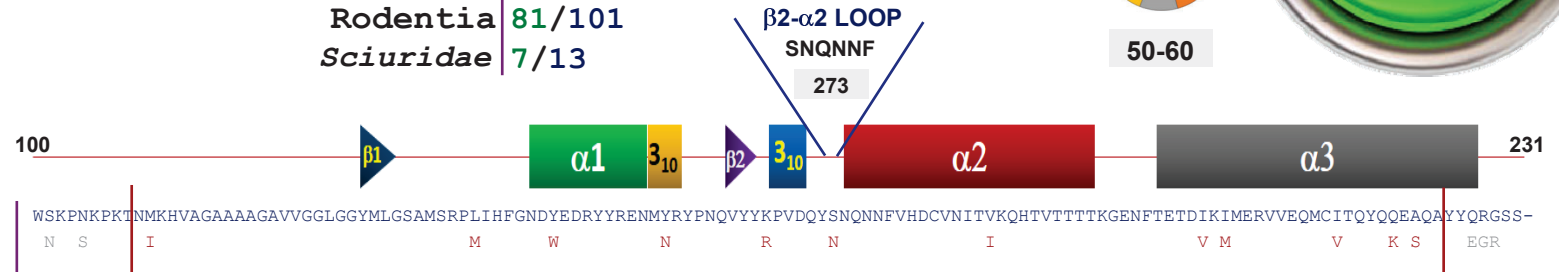

PrP sequence differs by 12 amino acids from the bank vole PrP (see in red)

- No deletions
- No insertions
- No polymorphic variants found

Distinct primary sequence across species

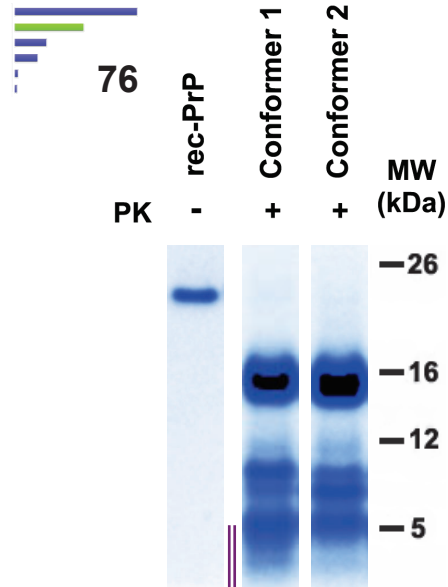

213 AA

**2**  
Conformers

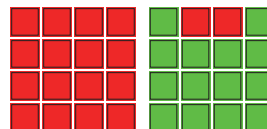

Tm<sup>Exp</sup>: ND

ΔΔG: **-13.01**

### *In vitro* studies

- TgVole (1x) **Propagate**
- Unstriped ground squirrel **Not tested**

### *In vivo* studies

- TgVole (1x) **Ongoing**
- Unstriped ground squirrel **Not tested**

pLDDT  
[85.16]

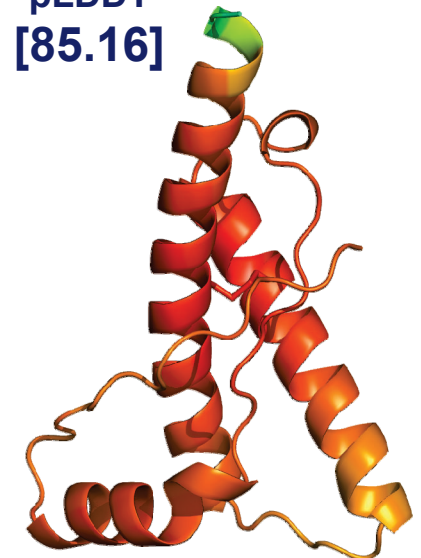

# Meadow jumping mouse

GenBank: **BK064139**

**P42%**

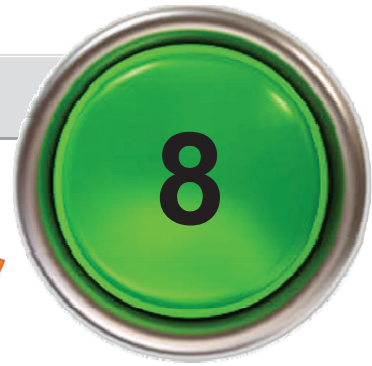

0-10

## *Zapus hudsonius*

Rodentia **81/101**  
Dipodidae **3/3**

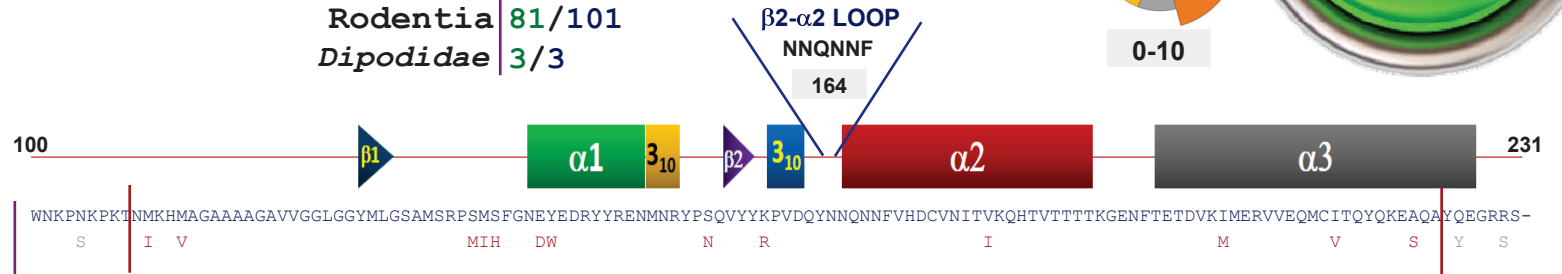

PrP sequence differs by 13 amino acids from the bank vole PrP (see in red)

- No deletions
- No insertions
- No polymorphic variants found

Distinct primary sequence across species

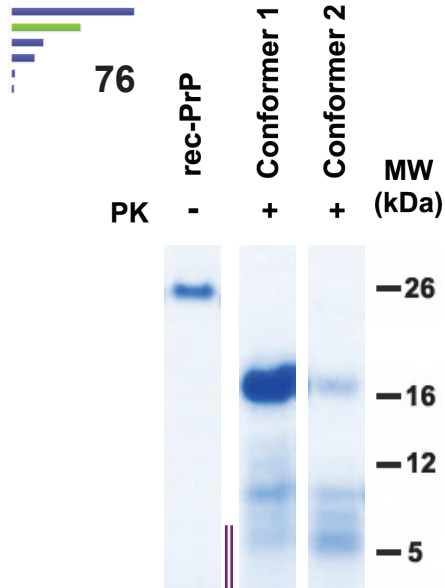

219 AA

**2**  
Conformers

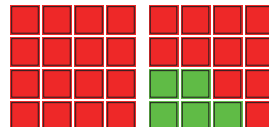

$T_m^{Exp}$ : ND

$\Delta\Delta G$ : **-9.25**

### *In vitro* studies

- TgVole (1x) Not tested
- Meadow jumping mouse Not tested

### *In vivo* studies

- TgVole (1x) Not tested
- Meadow jumping mouse Not tested

pLDDT  
**[85.07]**

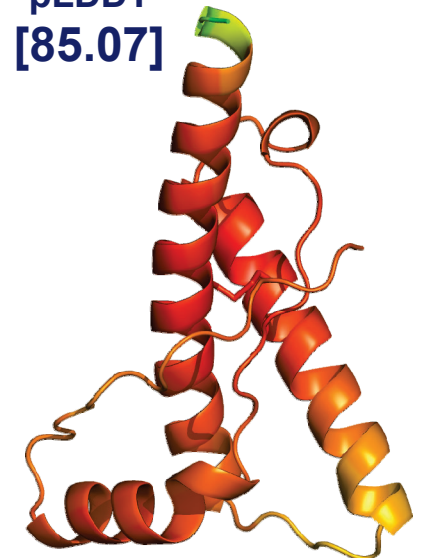

# Chinese tree shrew

GenBank: XM\_006163978

P82%

71.8



70-80

## *Tupaia belangeri chinensis*

Scandentia 2/2  
Tupaiaidae 2/2

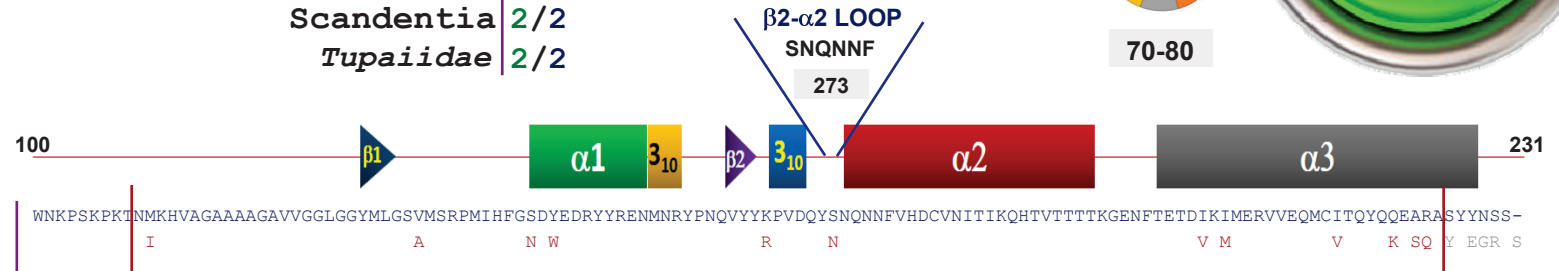

PrP sequence differs by 12 amino acids from the bank vole PrP (see in red)

No deletions  
No insertions  
No polymorphic variants found

Distinct primary sequence across species

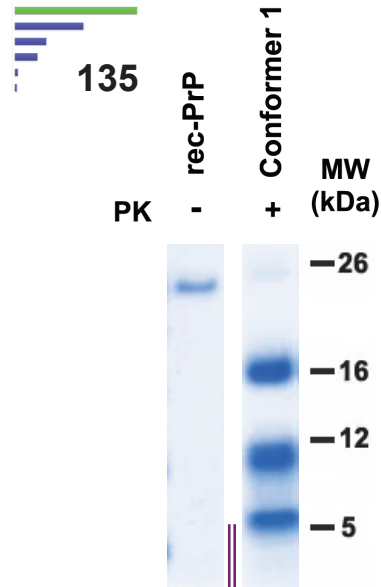

220 AA

1  
Conformers

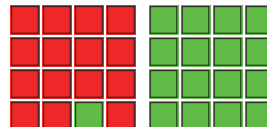

T<sub>m</sub><sup>Exp</sup>: ND  
ΔΔG: ND

### *In vitro* studies

TgVole (1x) Not tested  
Chinese tree shrew Not tested

### *In vivo* studies

TgVole (1x) Not tested  
Chinese tree shrew Not tested

pLDDT [93.79]

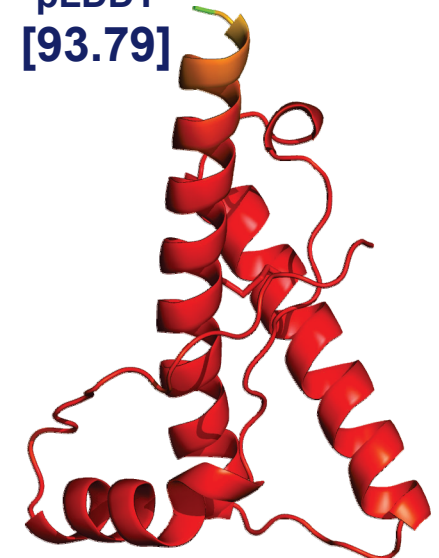

# Large treeshrew

GenBank: AY133035

P89%

89.3



80-90

## *Tupaia tana*

Scandentia 2/2

Tupaiaidae 2/2

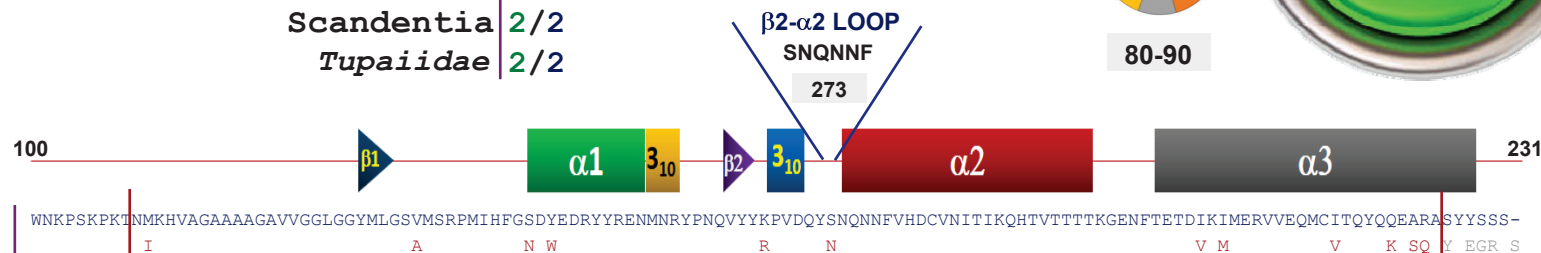

PrP sequence differs by 12 amino acids from the bank vole PrP (see in red)

No deletions  
No insertions  
No polymorphic variants found

Distinct primary sequence across species

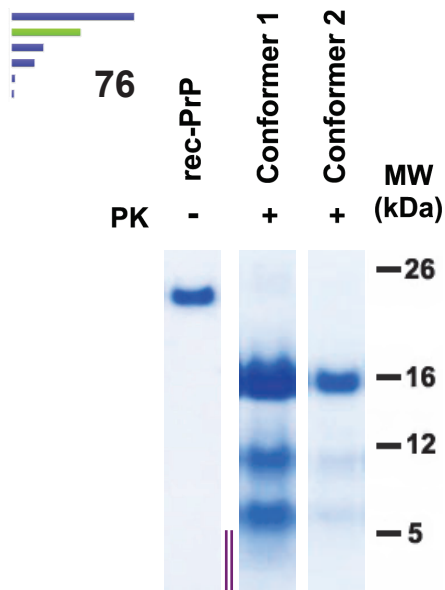

220 AA

2  
Conformers

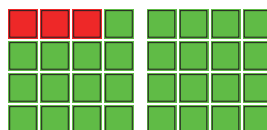

Tm<sup>Exp</sup>: ND

ΔΔG: ND

### *In vitro* studies

TgVole (1x) Not tested

Large treeshrew Not tested

### *In vivo* studies

TgVole (1x) Not tested

Large treeshrew Not tested

pLDDT  
[94.29]

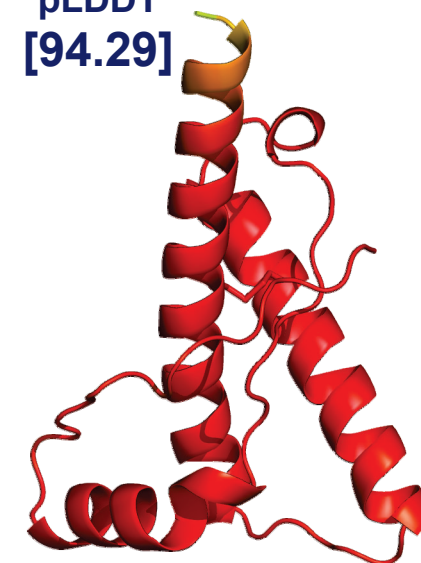

1 species sharing the same primary sequence

# Dugong

GenBank: **BK063981**

P29%



0

## Dugong dugon

Sirenia 1/2

Dugongidae 0/1

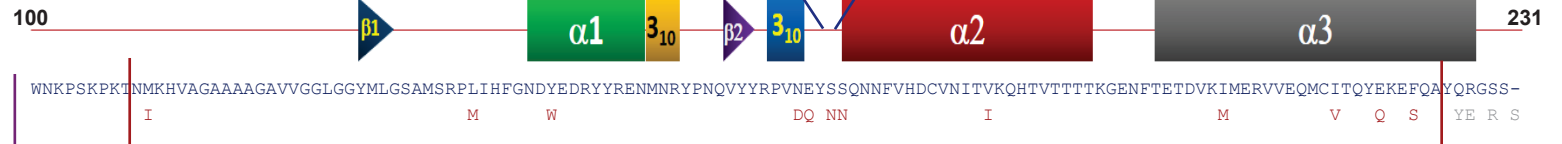

PrP sequence differs by 12 amino acids from the bank vole PrP (see in red)

- No deletions
- No insertions
- No polymorphic variants found

Tm<sup>Exp</sup>: ND

ΔΔG: ND

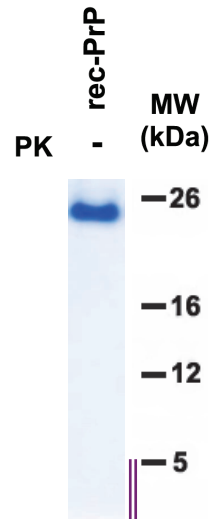

220 AA

0 Conformers

**NO MISFOLDING**

*In vitro* studies

**NOT APPLICABLE**

*In vivo* studies

**NOT APPLICABLE**

pLDDT [88.27]

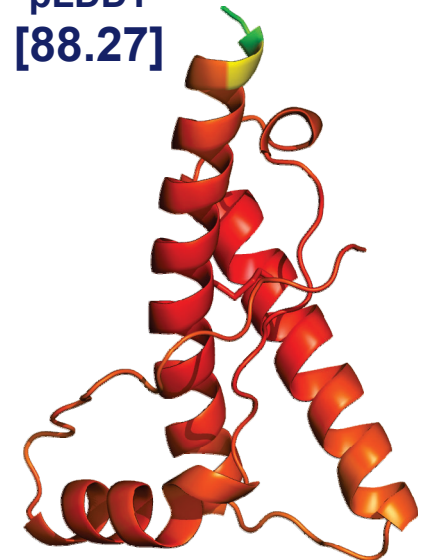



# West Indian manatee

GenBank: AY133056

P45%

8.9



0-10

## Trichechus manatus

Sirenia 1/2

Trichechidae 1/1

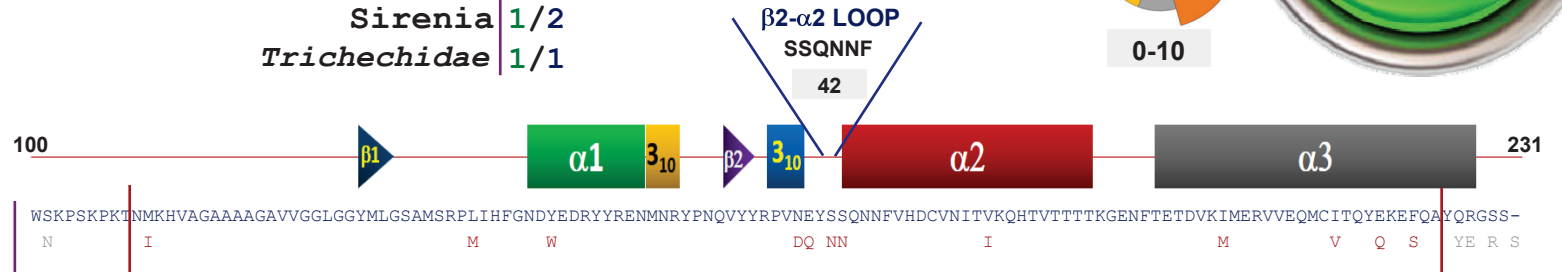

PrP sequence differs by 12 amino acids from the bank vole PrP (see in red)

- No deletions
- No insertions
- No polymorphic variants found

Distinct primary sequence across species

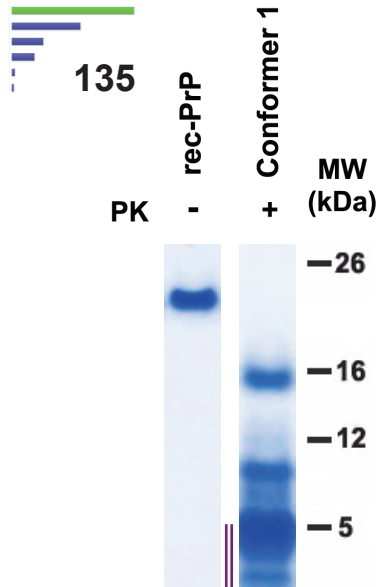

220 AA

1  
Conformers

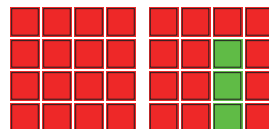

Tm<sup>Exp</sup>: ND

ΔΔG: ND

### In vitro studies

- TgVole (1x) Not tested
- West Indian manatee Not tested

### In vivo studies

- TgVole (1x) Not tested
- West Indian manatee Not tested

pLDDT [88.15]

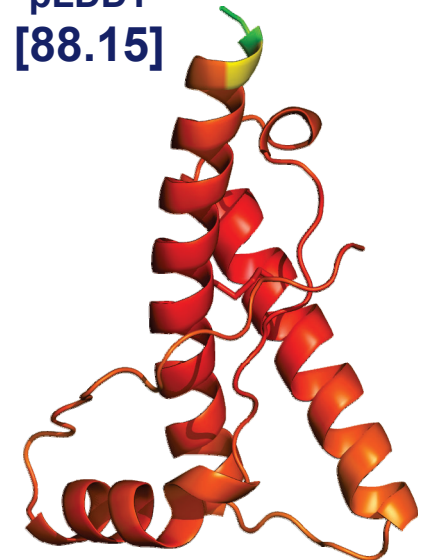

# Star-nosed mole

GenBank: XM\_012728373

P36%

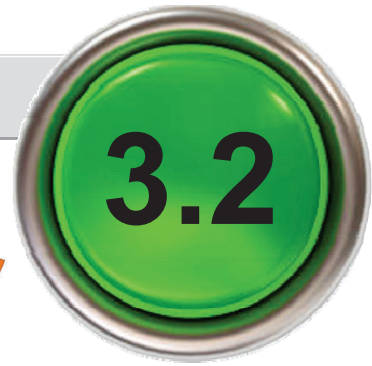

0-10

## Condylura cristata

Soricomorpha 7/12  
Talpidae 4/6

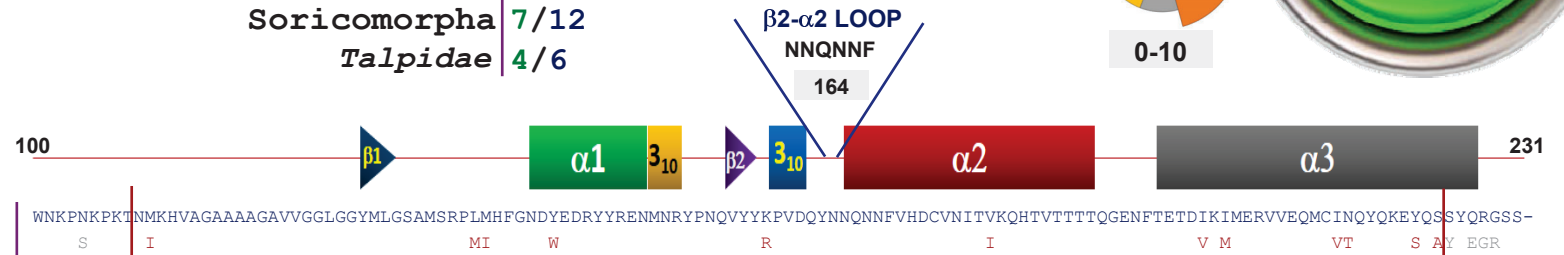

PrP sequence differs by 12 amino acids from the bank vole PrP (see in red)

No deletions  
No insertions  
No polymorphic variants found

Distinct primary sequence across species

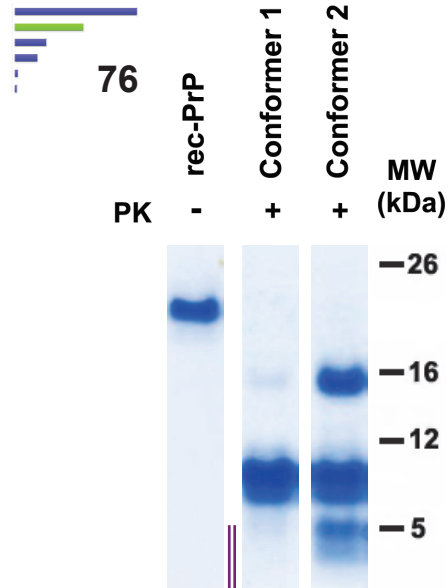

216 AA

2  
Conformers

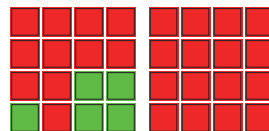

Tm<sup>Exp</sup>: ND  
 $\Delta\Delta G$ : -0.07

### In vitro studies

TgVole (1x) Not tested  
Star-nosed mole Not tested

### In vivo studies

TgVole (1x) Not tested  
Star-nosed mole Not tested

pLDDT [84.56]

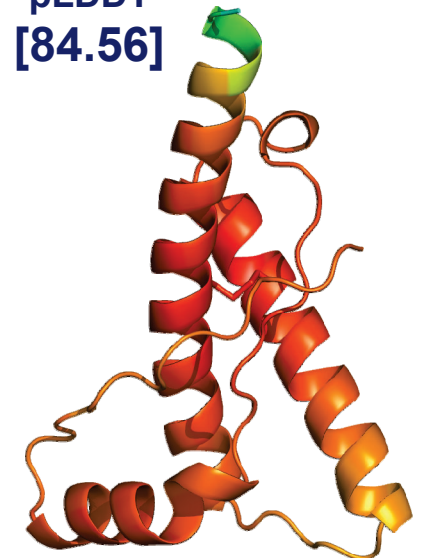

# Greater white-toothed shrew

GenBank: **OR47280**

## *Crocidura russula*

Soricomorpha 7/12  
Soricidae 2/5

P29%



0

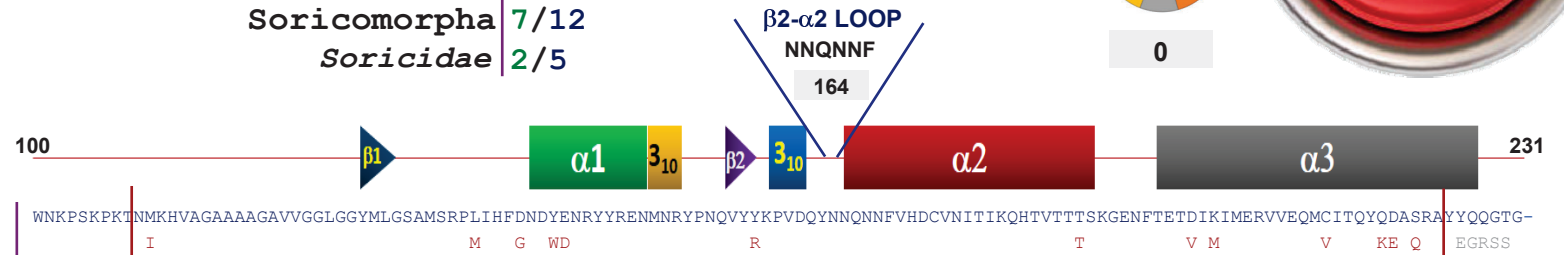

PrP sequence differs by 13 amino acids from the bank vole PrP (see in red)

- No deletions
- No insertions
- No polymorphic variants found

Tm<sup>Exp</sup>: ND

ΔΔG: **-18.73**

Distinct primary sequence across species

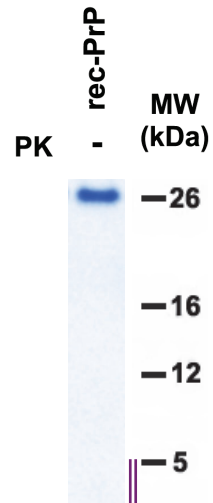

233 AA

0  
Conformers

**NO  
MISFOLDING**

*In vitro* studies

**NOT  
APPLICABLE**

*In vivo* studies

**NOT  
APPLICABLE**

pLDDT  
[91.1]

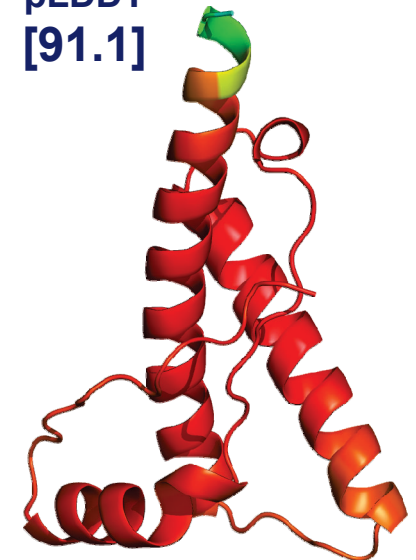

Distinct primary sequence across species

# Pyrenean desman

GenBank: **BK063927**

P51%

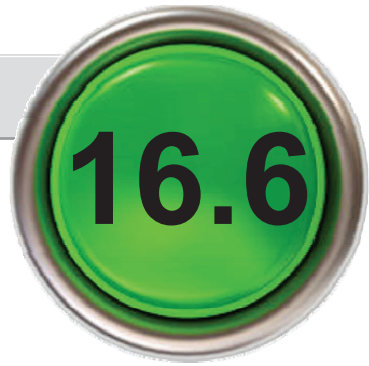

## Galemys pyrenaicus

Soricomorpha 7/12  
Talpidae 4/6

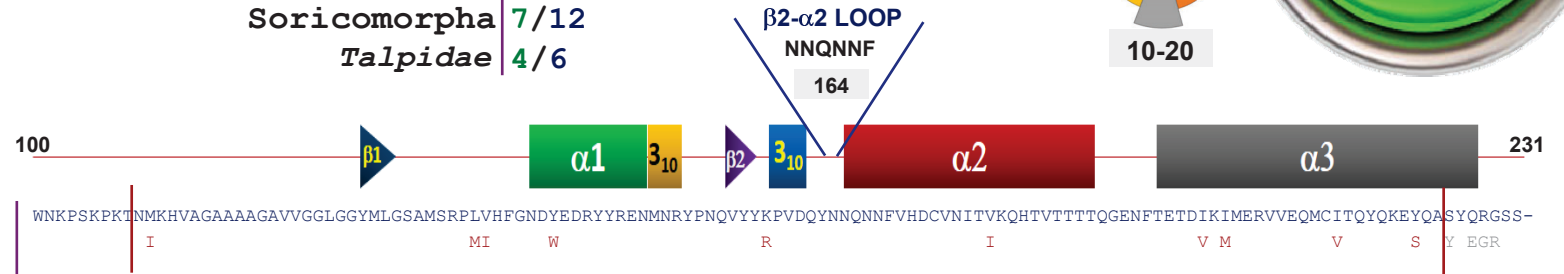

PrP sequence differs by 10 amino acids from the bank vole PrP (see in red)

- No deletions
- No insertions
- No polymorphic variants found

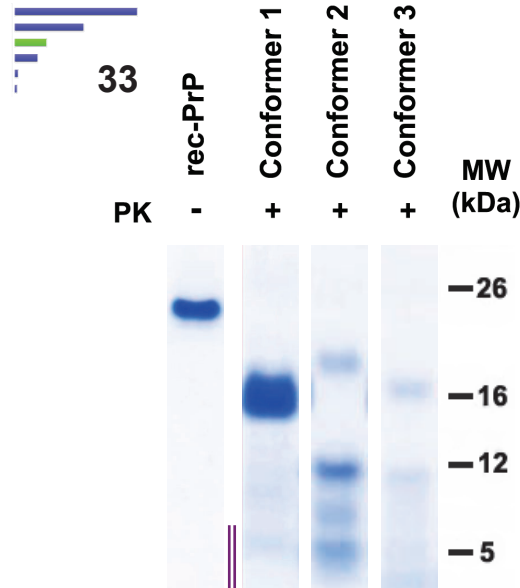

215 AA

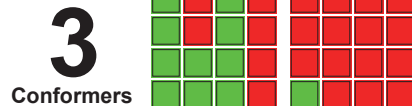

Tm<sup>Exp</sup>: ND  
ΔΔG: -9.42

### *In vitro* studies

TgVole (1x) Not tested  
Pyrenean desman Not tested

### *In vivo* studies

TgVole (1x) Not tested  
Pyrenean desman Not tested

pLDDT [84.45]

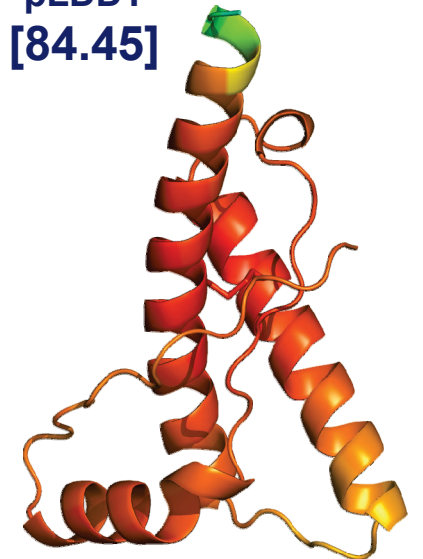

# Eastern mole

GenBank: **BK063985**

P29%



0

## Scalopus aquaticus

Soricomorpha 7/12  
Talpidae 4/6

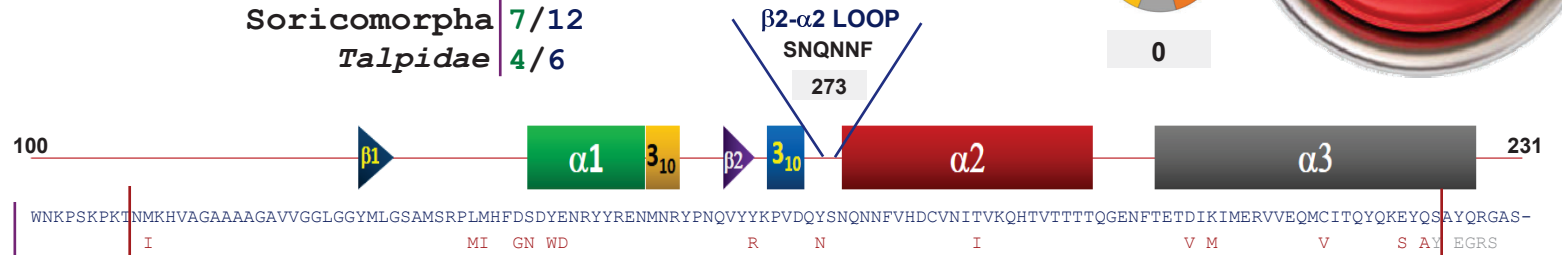

PrP sequence differs by 15 amino acids from the bank vole PrP (see in red)

- No deletions
- No insertions
- No polymorphic variants found

Tm<sup>Exp</sup>: ND

ΔΔG: -8.06

Distinct primary sequence across species

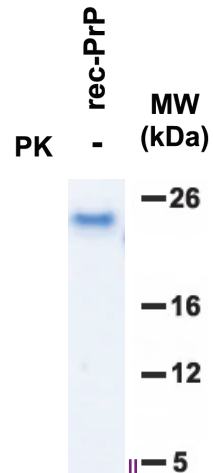

224 AA

0  
Conformers

NO  
MISFOLDING

*In vitro* studies

NOT  
APPLICABLE

*In vivo* studies

NOT  
APPLICABLE

pLDDT  
[86.98]

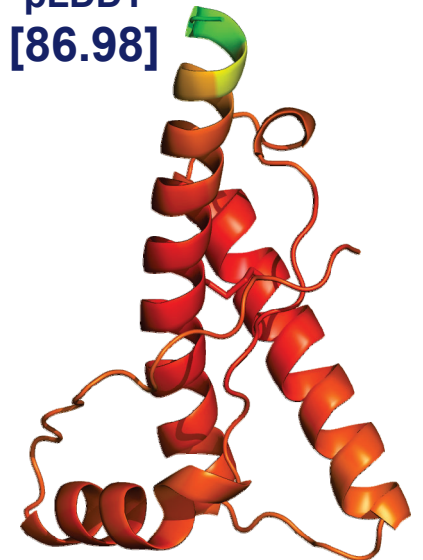

# Hispaniolan solenodon

GenBank: **BK063984**

P45%

8.9



0-10

## *Solenodon paradoxus woodi*

Soricomorpha 7/12

Solenodontidae 1/1

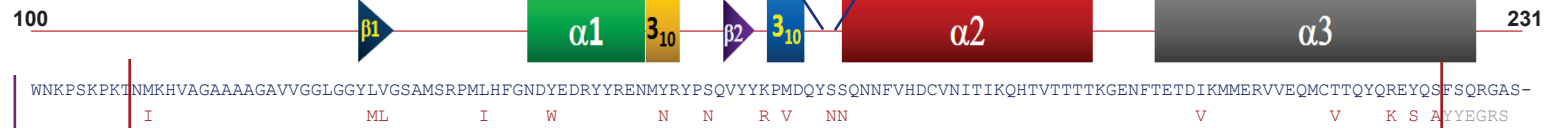

PrP sequence differs by 16 amino acids from the bank vole PrP (see in red)

No deletions  
No insertions  
No polymorphic variants found

Distinct primary sequence across species

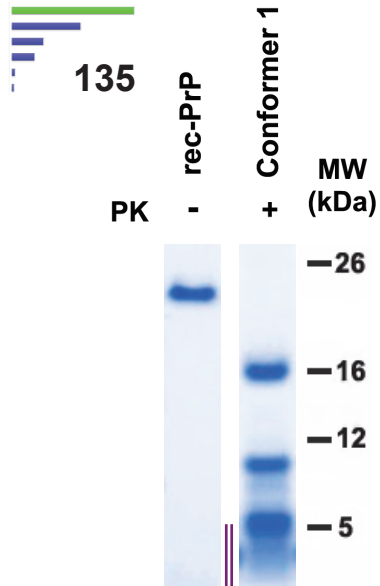

220 AA

1  
Conformers



Tm<sup>Exp</sup>: ND

ΔΔG: -8.12

### *In vitro* studies

TgVole (1x) Not tested

Hispaniolan solenodon Not tested

### *In vivo* studies

TgVole (1x) Not tested

Hispaniolan solenodon Not tested

pLDDT  
[85.01]

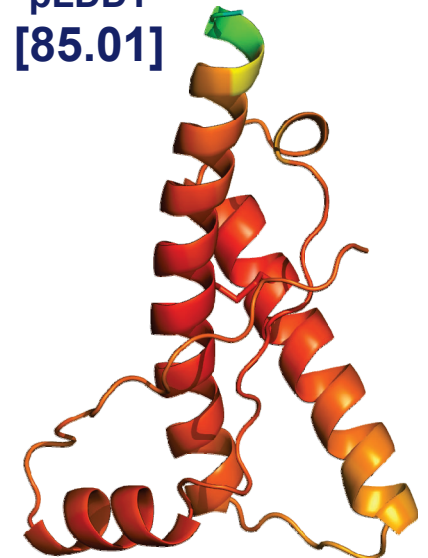

# Common shrew

GenBank: **BK064940**

P53%

17.9



## *Sorex araneus*

Soricomorpha 7/12  
Soricidae 2/5

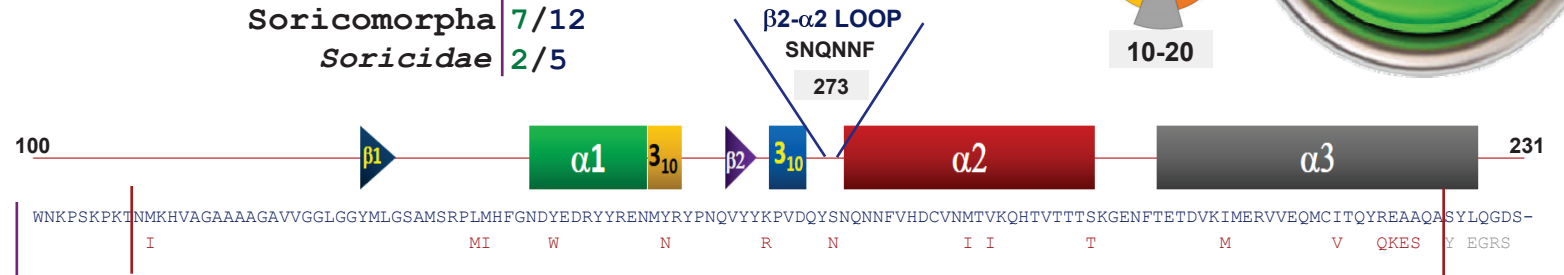

PrP sequence differs by 16 amino acids from the bank vole PrP (see in red)

- No deletions
- No insertions
- No polymorphic variants found

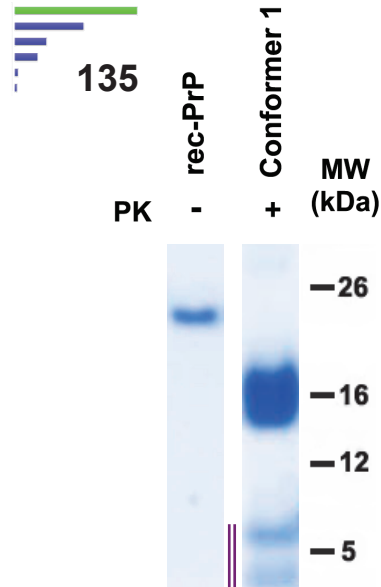

213 AA

1  
Conformers

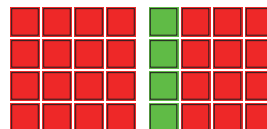

Tm<sup>Exp</sup>: ND

ΔΔG: -14.08

### *In vitro* studies

TgVole (1x) Not tested

Common shrew Not tested

### *In vivo* studies

TgVole (1x) Not tested

Common shrew Not tested

pLDDT [87.34]

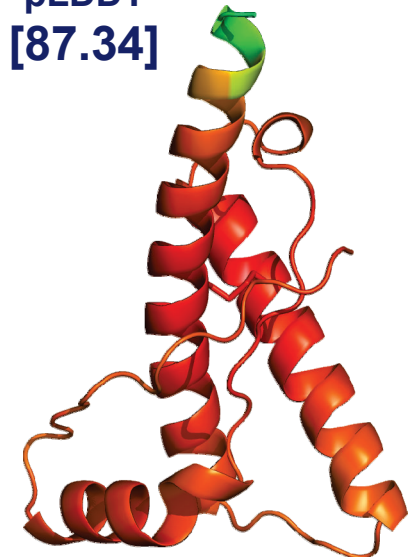

1 species sharing the same primary sequence

Maritime shrew  
*Sorex maritimensis*

# Cinereous shrew

GenBank: **BK063915**

P29%



0

## *Sorex cinereus*

Soricomorpha 7/12  
Soricidae 2/5

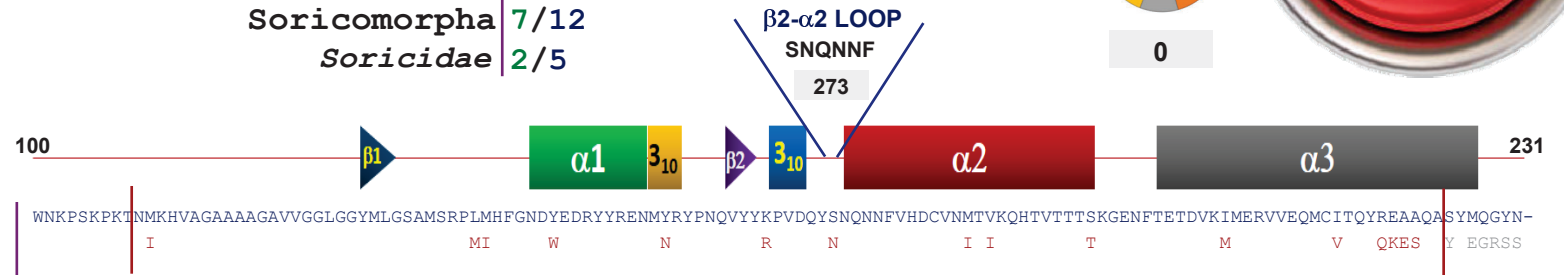

PrP sequence differs by 16 amino acids from the bank vole PrP (see in red)

No deletions  
No insertions  
No polymorphic variants found

Tm<sup>Exp</sup>: ND

ΔΔG: -4.11

1 species sharing the same primary sequence

Smoky shrew  
*Sorex fumeus*

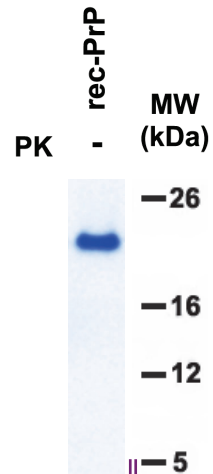

212 AA

0  
Conformers

**NO  
MISFOLDING**

*In vitro* studies

**NOT  
APPLICABLE**

*In vivo* studies

**NOT  
APPLICABLE**

pLDDT  
[93.25]

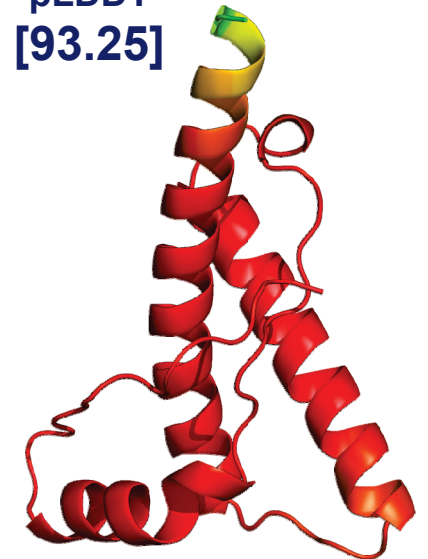



# American water shrew

GenBank: **BK064220**

P29%



0

## *Sorex palustris*

Soricomorpha 7/12  
Soricidae 2/5

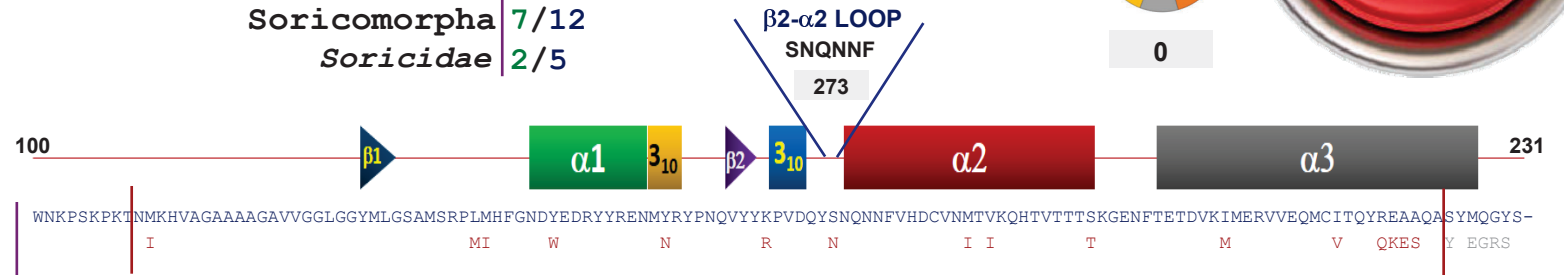

PrP sequence differs by 16 amino acids from the bank vole PrP (see in red)

No deletions  
No insertions  
No polymorphic variants found

$T_m^{Exp}$ : ND

$\Delta\Delta G$ : -9.15

Distinct primary sequence across species

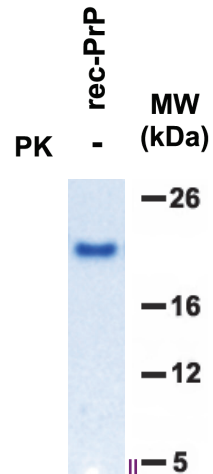

212 AA

0  
Conformers

**NO  
MISFOLDING**

*In vitro* studies

**NOT  
APPLICABLE**

*In vivo* studies

**NOT  
APPLICABLE**

pLDDT  
[92.83]

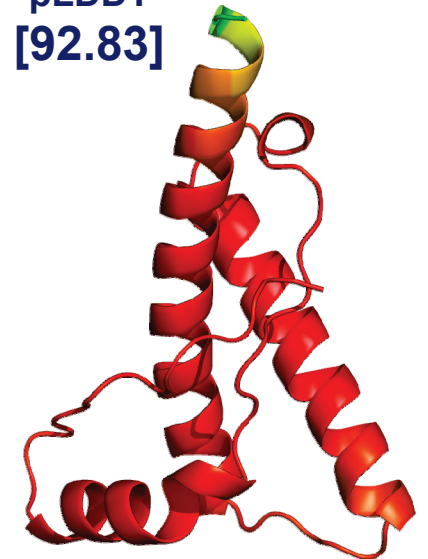

# Etruscan shrew

GenBank: **BK064203**

P69%

44.6



40-50

## *Suncus etruscus*

Soricomorpha 7/12

Soricidae 2/5

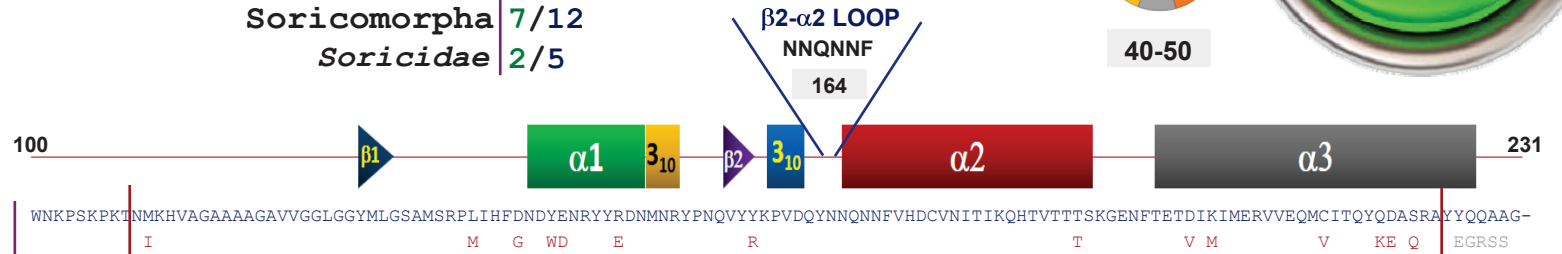

PrP sequence differs by 14 amino acids from the bank vole PrP (see in red)

No deletions  
No insertions  
No polymorphic variants found

Distinct primary sequence across species

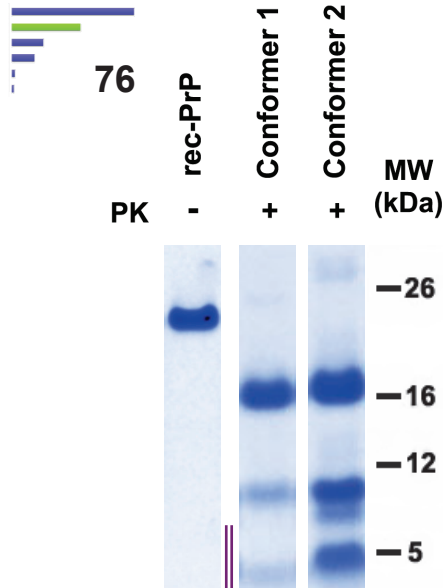

215 AA

2  
Conformers

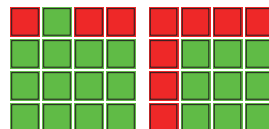

Tm<sup>Exp</sup>: ND

ΔΔG: -3.98

### *In vitro* studies

TgVole (1x) Not tested  
Etruscan shrew Not tested

### *In vivo* studies

TgVole (1x) Not tested  
Etruscan shrew Not tested

pLDDT  
[87.71]

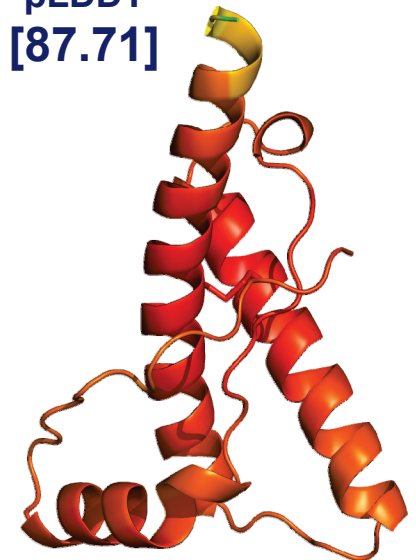

# European mole

GenBank: AY133042

P54%

18.8



10-20

## Talpa europaea

Soricomorpha 7/12

Talpidae 4/6

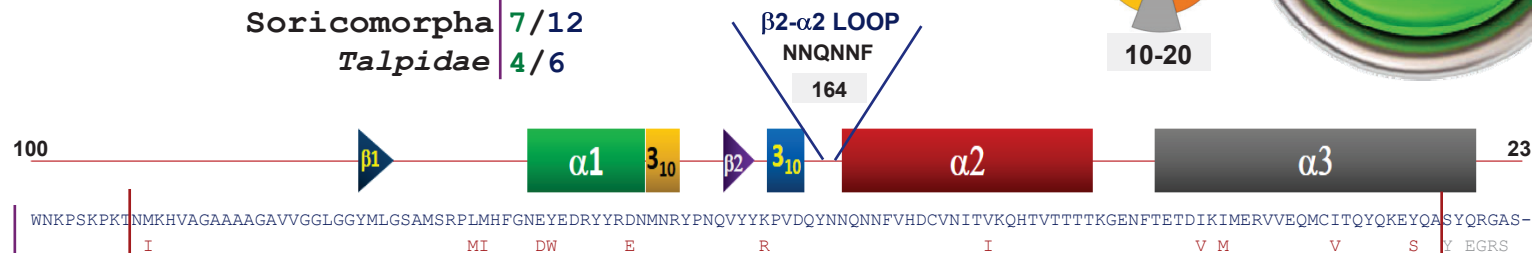

PrP sequence differs by 12 amino acids from the bank vole PrP (see in red)

- No deletions
- No insertions
- No polymorphic variants found

Distinct primary sequence across species

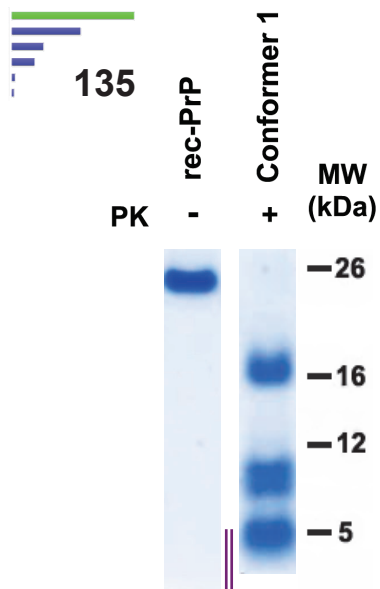

224 AA

1  
Conformers

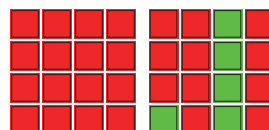

Tm<sup>Exp</sup>: ND

ΔΔG: -2.87

### In vitro studies

TgVole (1x) Not tested

European mole Not tested

### In vivo studies

TgVole (1x) Not tested

European mole Not tested

pLDDT  
[84.95]

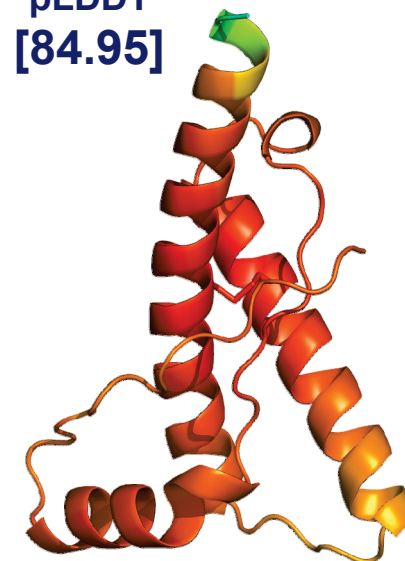

Distinct primary sequence across species

# Spanish mole

GenBank: **BK063986**

P57%

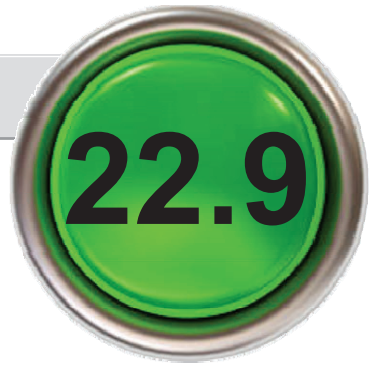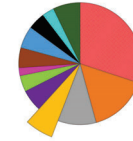

20-30

## Talpa occidentalis

Soricomorpha 7/12  
Talpidae 4/6

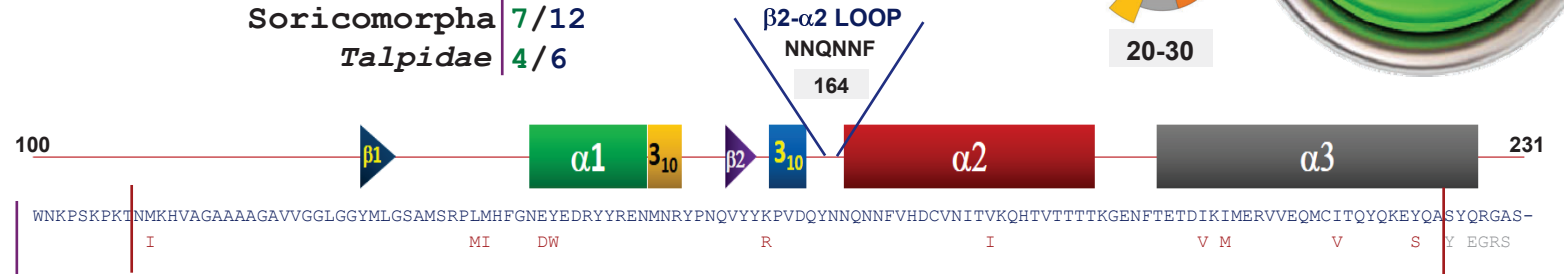

PrP sequence differs by 11 amino acids from the bank vole PrP (see in red)

- No deletions
- No insertions
- No polymorphic variants found

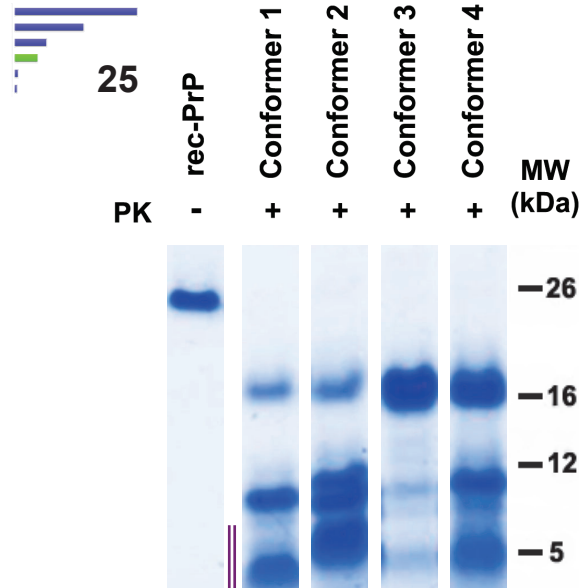

224 AA

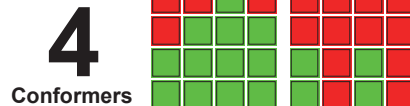

Tm<sup>Exp</sup>: ND  
ΔΔG: -3.35

### *In vitro* studies

- TgVole (1x) Not tested
- Spanish mole Not tested

### *In vivo* studies

- TgVole (1x) Not tested
- Spanish mole Not tested

pLDDT [85.06]

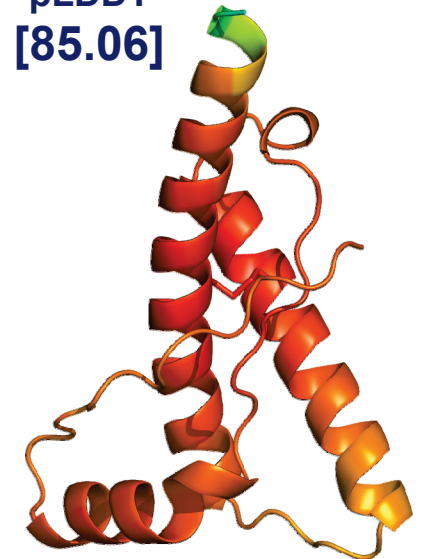

# Gracile shrew mole

GenBank: **BK063987**

P29%



0

## *Uropsilus gracilis*

Soricomorpha 7/12  
Talpidae 4/6

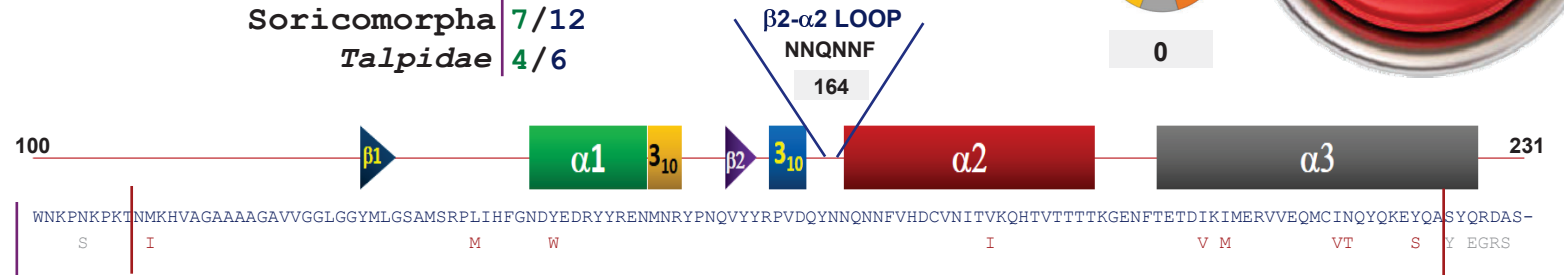

PrP sequence differs by 9 amino acids from the bank vole PrP (see in red)

No deletions  
No insertions  
No polymorphic variants found

Tm<sup>Exp</sup>: ND

ΔΔG: -5.6

Distinct primary sequence across species

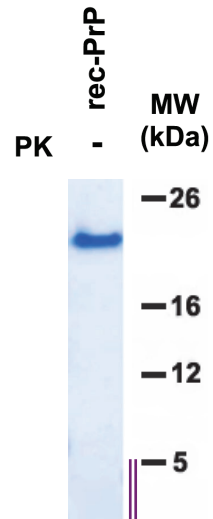

215 AA

0  
Conformers

**NO  
MISFOLDING**

*In vitro* studies

**NOT  
APPLICABLE**

*In vivo* studies

**NOT  
APPLICABLE**

pLDDT  
[87.19]

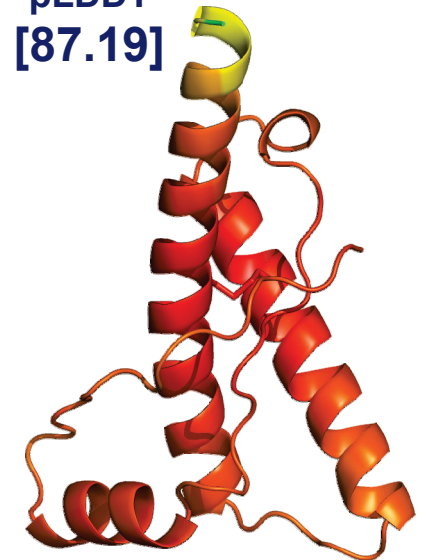

# Aardvark

GenBank: AY133058

P29%



0

## *Orycteropus afer*

Tubulidentata 0/1

Orycteropodidae 0/1

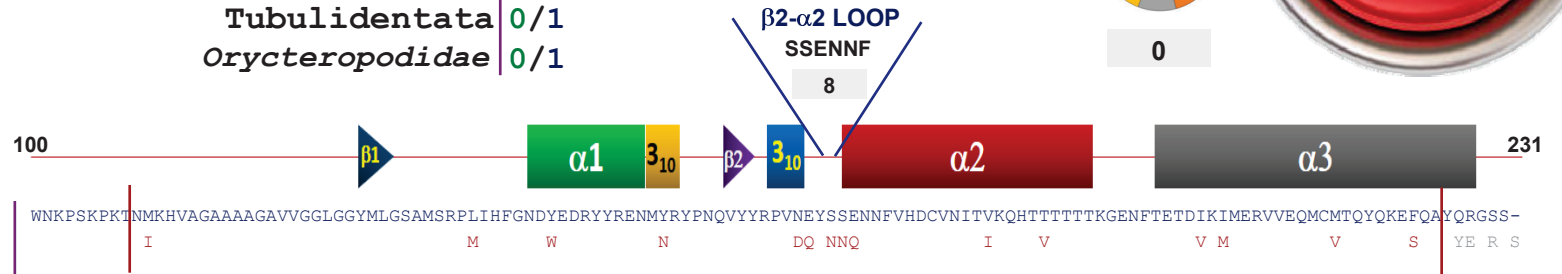

PrP sequence differs by 15 amino acids from the bank vole PrP (see in red)

- No deletions
- No insertions
- No polymorphic variants found

Tm<sup>Exp</sup>: ND

ΔΔG: ND

Distinct primary sequence across species

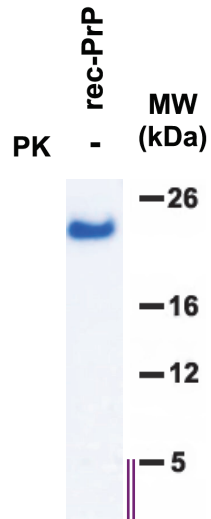

212 AA

0  
Conformers

**NO  
MISFOLDING**

*In vitro* studies

**NOT  
APPLICABLE**

*In vivo* studies

**NOT  
APPLICABLE**

pLDDT  
[92.56]

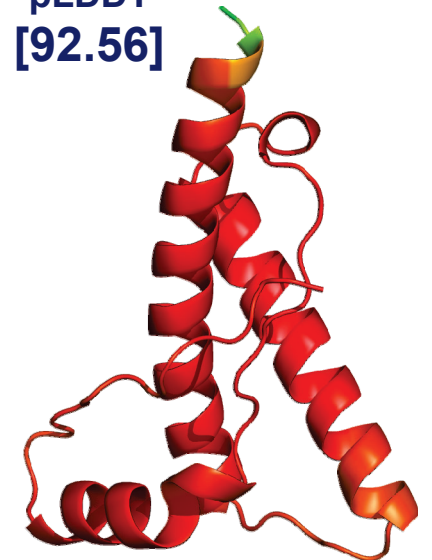

Supplement: 41467_2024_46360_MOESM5_ESM.pdf [file 41467_2024_46360_MOESM5_ESM.pdf]
