# Supplementary material for: A Protein Misfolding Shaking Amplification-based method for the spontaneous generation of hundreds of bona fide prions
Source: Springer Nature journal article supplement (doi:10.1038/s41467-024-46360-2), 2024-03-08
Supplement: 41467_2024_46360_MOESM1_ESM.pdf [file 41467_2024_46360_MOESM1_ESM.pdf]

## **A Protein Misfolding Shaking Amplification-based method for the spontaneous generation of hundreds of infectious prions**

Hasier Eraña<sup>1,2,3</sup>, Cristina Sampedro-Torres-Quevedo<sup>1</sup>, Jorge M. Charco<sup>1,2,3</sup>, Carlos M. Díaz-Domínguez<sup>1,2</sup>, Francesca Peccati<sup>1</sup>, Maitena San-Juan-Ansoleaga<sup>1</sup>, Enric Vidal<sup>4,5</sup>, Nuno Gonçalves-Anjo<sup>1</sup>, Miguel A. Pérez-Castro<sup>1</sup>, Ezequiel González-Miranda<sup>1</sup>, Patricia Piñeiro<sup>1</sup>, Leire Fernández-Veiga<sup>1</sup>, Josu Galarza-Ahumada<sup>1</sup>, Eva Fernández-Muñoz<sup>1</sup>, Guiomar Perez de Nanclares<sup>6</sup>, Glenn Telling<sup>7</sup>, Mariví Geijo<sup>8</sup>, Gonzalo Jiménez-Osés<sup>1,9</sup> and Joaquín Castilla<sup>1,2,9\*</sup>

<sup>1</sup> Center for Cooperative Research in Biosciences (CIC BioGUNE), Basque Research and Technology Alliance (BRTA), Derio, Spain.

<sup>2</sup> Centro de Investigación Biomédica en Red de Enfermedades infecciosas (CIBERINFEC), Carlos III National Health Institute, Madrid, Spain.

<sup>3</sup> ATLAS Molecular Pharma S. L., Derio, Spain.

<sup>4</sup> IRTA. Programa de Sanitat Animal. Centre de Recerca en Sanitat Animal (CRESA). Campus de la Universitat Autònoma de Barcelona (UAB), Bellaterra, Catalonia. Spain.

<sup>5</sup> Unitat mixta d'Investigació IRTA-UAB en Sanitat Animal. Centre de Recerca en Sanitat Animal (CRESA). Campus de la Universitat Autònoma de Barcelona (UAB), Bellaterra, Catalonia. Spain.

<sup>6</sup> Molecular (Epi)Genetics Laboratory, Bioaraba Health Research Institute, Araba University Hospital, Vitoria-Gasteiz, Spain.

<sup>7</sup> Prion Research Center. Colorado State University, Fort Collins, USA.

<sup>8</sup> Animal Health Department, NEIKER-Basque Institute for Agricultural Research and Development. Basque Research and Technology Alliance (BRTA), Derio, Spain.

<sup>9</sup> IKERBASQUE, Basque Foundation for Science, Bilbao, Spain.

\*Corresponding author: Joaquín Castilla; [jcastilla@cicbiogune.es](mailto:jcastilla@cicbiogune.es)

### **SUPPLEMENTARY INFORMATION**

**Supplementary Fig. 1**

**Supplementary Fig. 2**

**Supplementary Fig. 3**

**Supplementary Fig. 4**

**Supplementary Methods**

**Recombinant prion protein expression and purification**

**Substrate preparation for Protein Misfolding Shaking Amplification**

**Protein Misfolding Shaking Amplification**

**Purification of rec-PrP<sup>res</sup> to be used as seeds in PMCA**

**List of reagents, company name and catalogue numbers**

**Supplementary Table 1**

**Supplementary Table 2**

**Supplementary Table 3**

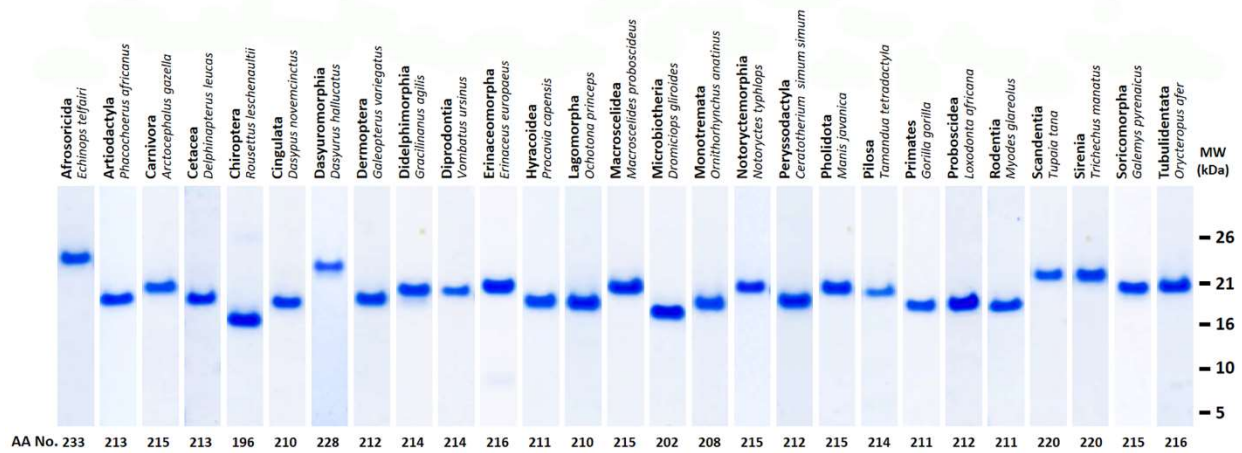

**Supplementary figure 1. Illustrative example of PMSA substrates visualized by electrophoresis and total protein staining, prepared for the assessment of their spontaneous misfolding capacity through PMSA.**

Substrates containing 27 different rec-PrP variants from mammal species belonging to each distinct order studied are shown after their analysis by electrophoresis and total protein staining. The gel image illustrates that all prepared substrates present similar rec-PrP concentrations and the absence of detectable multimers or protein fragments. This indicates the overall high protein quality achieved through our production, purification, and substrate preparation procedures. Below the gel, the number of amino acids of each protein is indicated, confirming their expected size according to the molecular weight marker (MW) used for reference. This alignment was performed by comparing the original gels used as quality control of each substrate, which were consistently run alongside the same molecular weight marker. Additionally, to minimize variability derived from the unavoidable inter-gel comparison, PMSA substrates were run in groups of 8 proteins per gel, with 3-4 gels processed in parallel, making 24-32 proteins processed in parallel each time. Original, uncropped gels are publicly available in Zenodo repository ([10.5281/zenodo.105281](https://zenodo.org/record/105281))<sup>1</sup>, as detailed in Data Availability section.

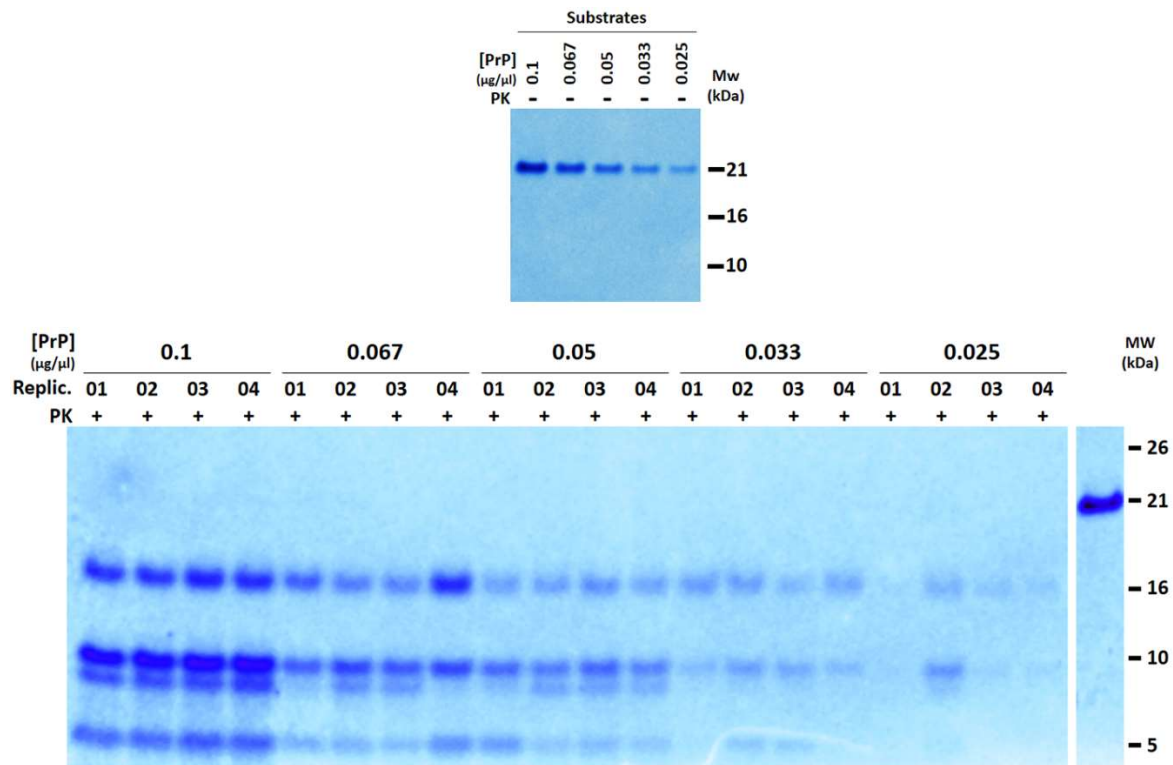

**Supplementary figure 2. Assessment of rec-PrP concentration range in PMSA substrate required for reproducible evaluation of spontaneous misfolding capacity.** To determine the range of rec-PrP concentration within a PMSA substrate that allows consistent results in terms of spontaneous misfolding capacity, substrates containing distinct bank vole rec-PrP concentrations (0.1, 0.067, 0.05, 0.033 and 0.025  $\mu\text{g}/\mu\text{l}$ ) were prepared, visualized through electrophoresis and total protein staining (upper gel) and subjected to a single 24 h PMSA round. Given the influence of the rec-PrP concentration on its spontaneous misfolding capacity, determining a range that allows consistent results in terms of misfolding is convenient to avoid precise quantitative measurement of the rec-PrP concentration of each of the PMSA substrates prepared for the study. 4 replicates of each substrate were used to evaluate misfolding ( $n=4$ ), and as shown in the gel at 0.033  $\mu\text{g}/\mu\text{l}$  all the tubes are positive albeit with a lower signal and even at 0.025  $\mu\text{g}/\mu\text{l}$ , with four times less rec-PrP in the substrate three out of four tubes are clearly positive and the fourth shows a very faint signal that would undoubtedly be positive in a second PMSA round. Therefore, we can conclude that in a range of 0.1 to 0.025  $\mu\text{g}/\mu\text{l}$  of rec-PrP in the substrate, spontaneous misfolding score is not significantly altered, allowing to work with all the different substrates prepared throughout the study such as the ones included in Supplementary figure 1, that in any case show greater rec-PrP concentration differences than those tested here. Original, uncropped gels are publicly available in Zenodo repository ([10.5281/zenodo.10579518](https://doi.org/10.5281/zenodo.10579518))<sup>1</sup>, as detailed in Data Availability section.

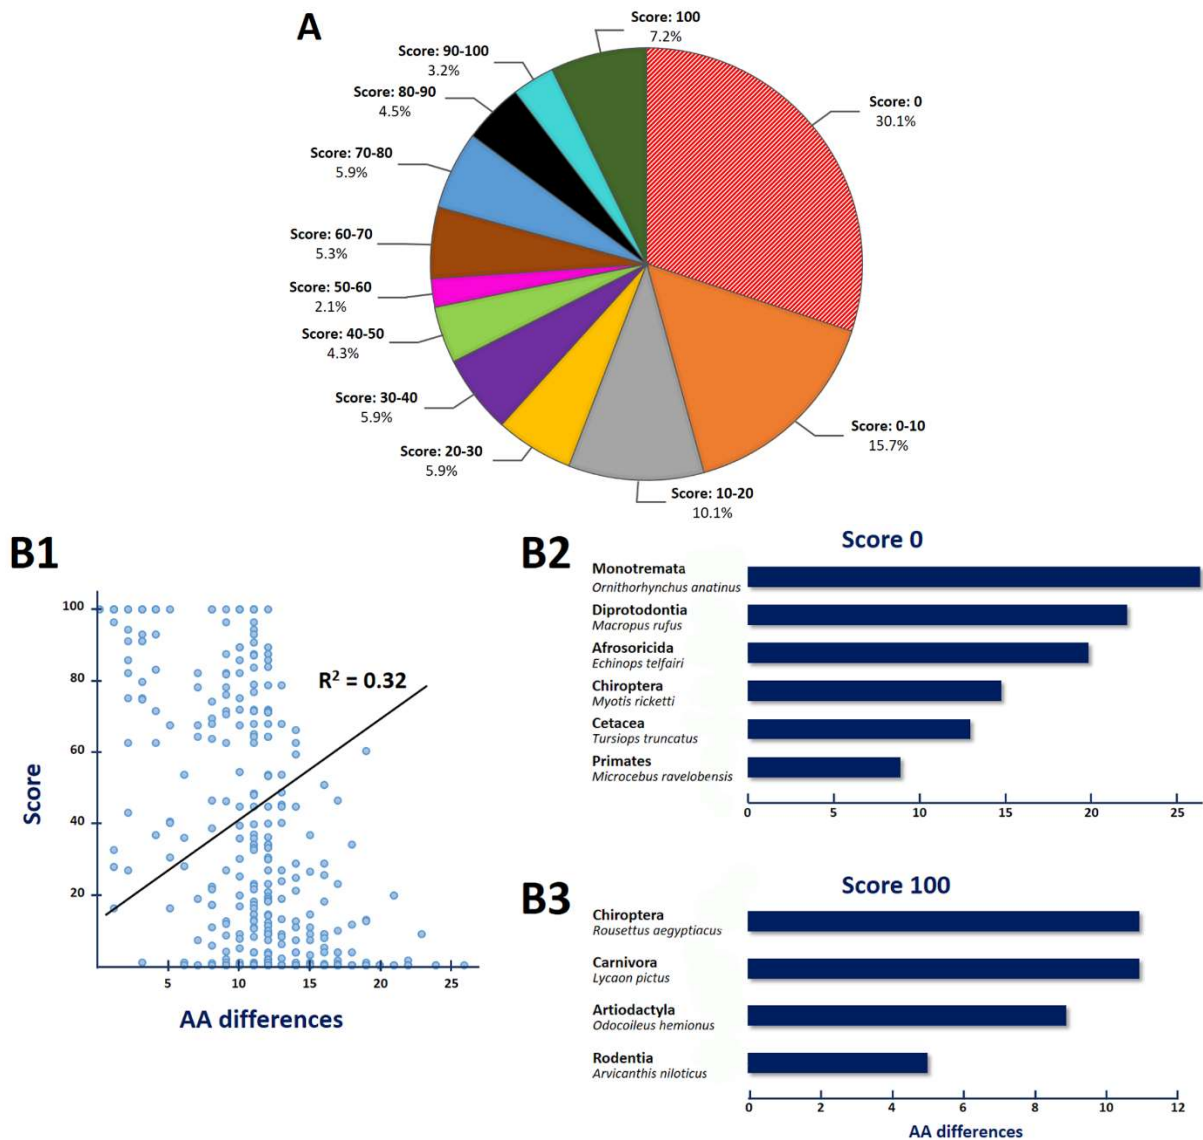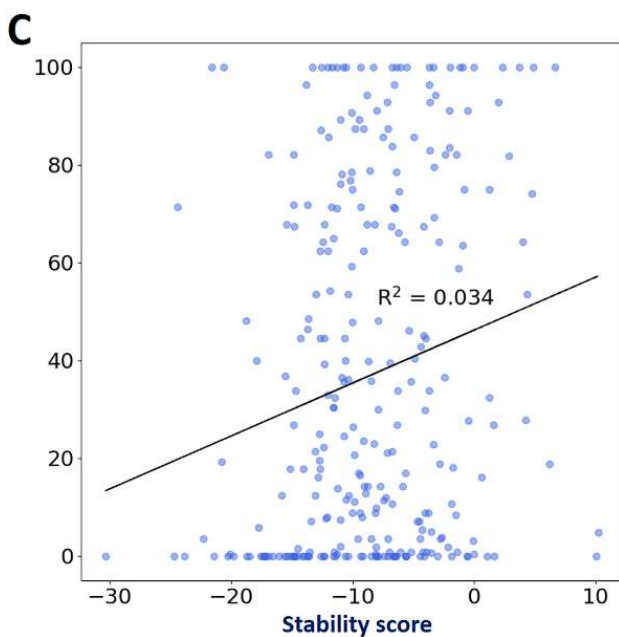

**Supplementary figure 3. General analysis of PMSA results including distribution of rec-PrP variants with respect to misfolding score percentile and examination of potential correlations between misfolding score, amino acid differences and predicted stability. A) Pie chart depicting the distribution of rec-PrP variants grouped in deciles according to their misfolding proneness score. To get an overview of the overall misfolding capacity of the 382 distinct rec-PrP variants, the percentage of species with misfolding scores in the same decile was plotted. This figure illustrates the intriguing number of rec-PrP variants encountered with very low misfolding scores, representing almost half of the variants analyzed, being 30.1 % unable to misfold in our system. From the roughly 70 % that spontaneously misfolded, there is a wide distribution of species, with lowest and highest misfolding score deciles being more populated. Approximately 16 % of the species displayed misfolding scores below 20, while roughly 15 % of the species had scores higher**

than 80, highlighting the resolution of our methodology in assessing the diverse misfolding capacities of different rec-PrP variants. **B) Analysis of potential correlation between misfolding score and number of amino acids differing from bank vole rec-PrP.** Given that our methodology was originally developed using bank vole rec-PrP, a species known for its high susceptibility to a wide range of prion diseases and thus, our gold standard in terms of misfolding proneness, we performed a correlative analysis, plotting misfolding score of each rec-PrP variant against the number of amino acids differing from bank vole rec-PrP. As shown in panel B1, there is no significant correlation ( $R^2=0.32$ ) between these two parameters. This suggests that it is not a set of specific residues but rather their differential effect in the context of each rec-PrP variant what determines the spontaneous misfolding proneness. To better illustrate this, six species with misfolding scores of 0 (panel B2) and four species with misfolding scores of 100 (as bank vole rec-PrP, panel B3), and their number of differing residues with respect to bank vole rec-PrP are shown, indicating that high or low misfolding scores are not associated only with sequence similarity to bank vole. **C) Analysis of potential correlation between misfolding score and predicted stability of the natively folded rec-PrP.** To check if the stability of the natively folded isoform of each PrP variant could be somehow related to its spontaneous misfolding capacity, first the native structures of virtually all rec-PrP variants submitted to PMSA were predicted *in silico* using AlphaFold, as well as their relative thermodynamic stability, when possible, based on the similarity to bank vole PrP in terms of total amino acid number. The plot represents calculated thermodynamic stability ( $\Delta\Delta G_f$ , x-axis) vs. misfolding proneness score (y-axis) for 284 unique, equally long prion sequences. The low coefficient of determination ( $R^2=0.034$ ) indicates that there is no significant correlation between the two variables, indicating that misfolding proneness is independent of the thermodynamic stability of the native isoform. All the Source Data used for these figures is publicly available in Zenodo repository ([10.5281/zenodo.10579518](https://doi.org/10.5281/zenodo.10579518))<sup>1</sup> as detailed in the Data Availability section.

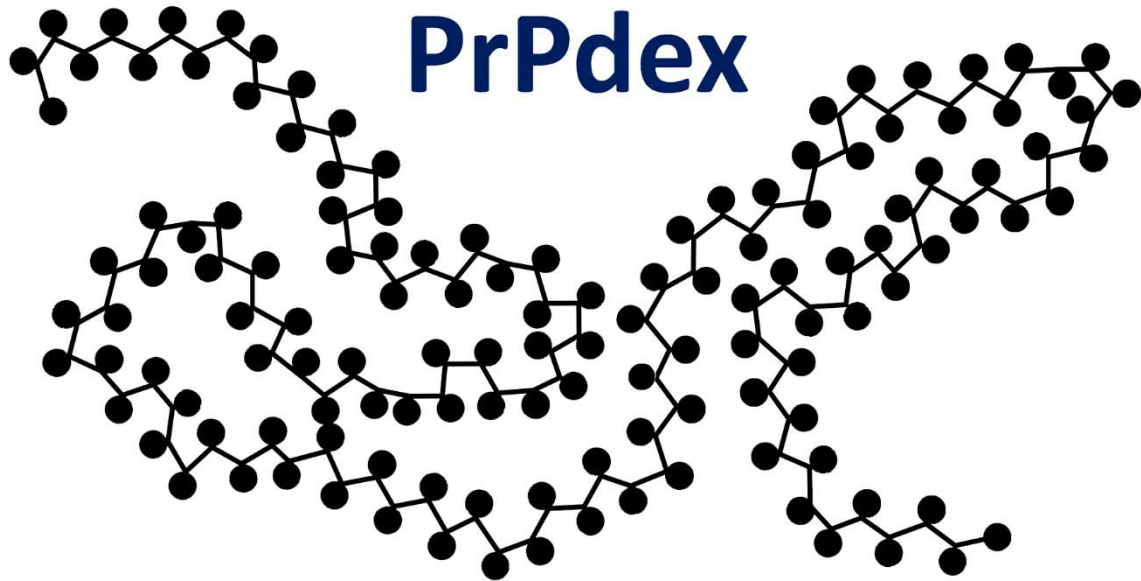

The most comprehensive encyclopedia dedicated to mammal prion protein variants and the study of their misfolding capacities

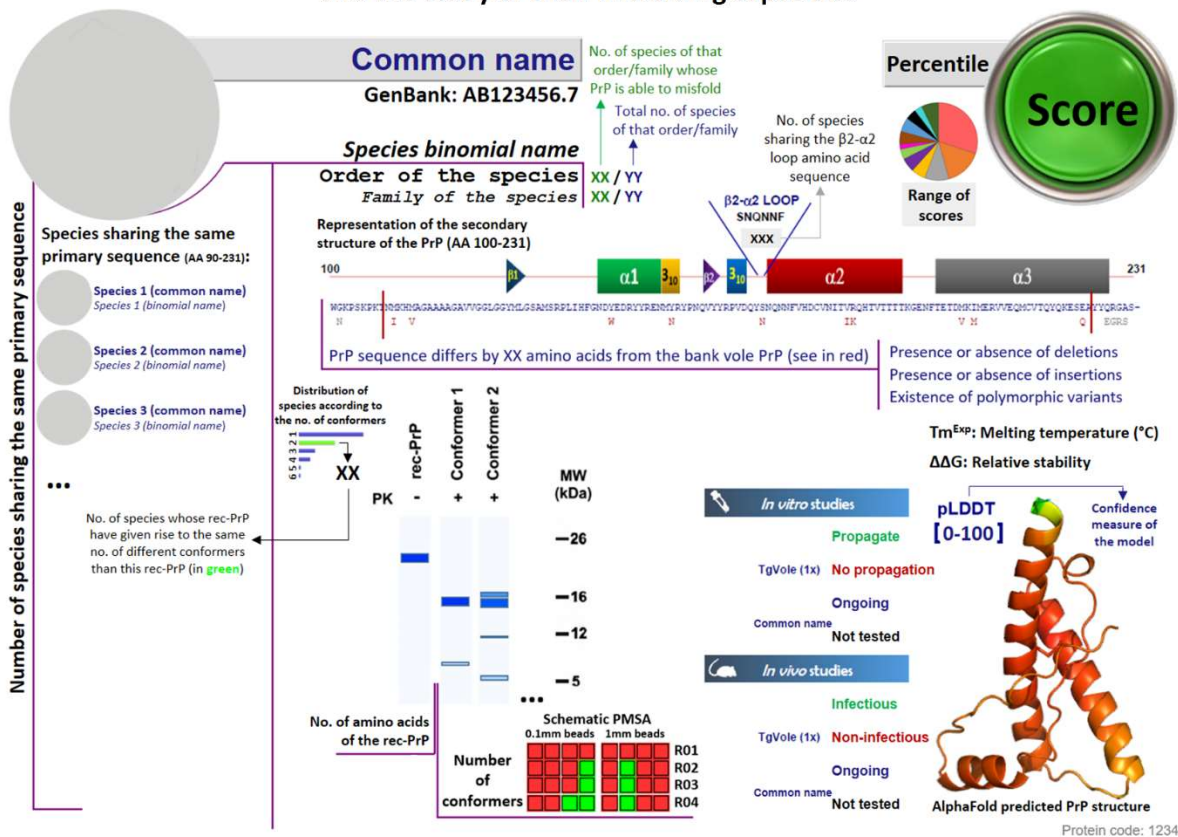

A pdf file with all 382 files available in <https://prpdex.com/prpdex.pdf> is also provided as Supplementary Data 1 in this manuscript.

**Supplementary figure 4. Main page and example file of the PrPdex, the most comprehensive mammal PrP variant database.** The database compiling all the results derived from this study, was named PrPdex, as it intends to be a dynamic and continuously growing resource with information on the PrP sequences and misfolding properties of all mammal species. Hosted in the <https://prpdex.com> webpage, this database contains 382 files corresponding to the PrP variants analyzed so far. Behind the front page, where a hypothetical three-dimensional structure of a PrP<sup>Sc</sup> molecule (based on <sup>2</sup>) is depicted creatively substituting amino acids for images of some of the misfolding prone species studied, individual files for each of them can be found. Each file includes a

photograph of the mammal species, both their common and binomial names and the GenBank accession number of the PrP sequence in the upper left corner. On the left of each file, a list of species sharing the same PrP sequence from amino acid 90 onwards (the region thought to be most influential for misfolding) is provided. In cases where there are no shared sequences, the message “Distinct primary sequence across species” is displayed. In the upper right part of the file, the misfolding score is shown within a green circle if greater than 0, or within a red circle if the PrP was unable to misfold spontaneously in our system. The percentile rank in which the PrP is placed based on its misfolding proneness with regards to the whole sample is indicated, ranging from 29 % to 100 % (given the roughly 30 % of non misfoldable PrP variants found). In addition, the pie chart classifies all analyzed PrP variants into deciles, highlighting the specific decile to which each PrP belongs in terms of misfolding capacity. Related to the spontaneous misfolding propensity, below the binomial name of the species, the file includes the number of species from the same order and family analyzed (blue) and the number or species in each case that was positive for spontaneous misfolding (green). The central part of the file illustrates the main secondary structure elements of the PrP, the two short  $\beta$ -sheets ( $\beta$ 1 and  $\beta$ 2), the three  $\alpha$ -helices ( $\alpha$ 1,  $\alpha$ 2 and  $\alpha$ 3) and the two  $3_{10}$  helices, emphasizing other potentially relevant sequences such as the  $\beta$ 2- $\alpha$ 2 loop. The corresponding amino acid sequence from residues 100 to the C-terminus is highlighted in red, indicating amino acids that differ from bank vole PrP. Any indels or polymorphic variants specific to the species are also disclosed. Finally, the results obtained throughout this study are shown summarized, including the electrophoretic mobility pattern of the different conformers detected as observed after PK treatment electrophoresis, and total protein staining (including a bar plot of the proportion of variants with 1 to 6 conformers), the rec-PrP substrate and its length in amino acids, a schematic representation of rec-PrP<sup>res</sup> detection through the serial PMSA rounds (green squares representing rec-PrP<sup>res</sup> positive samples in each replicate and round and red squares rec-PrP<sup>res</sup> negative ones), and the infectivity studies performed *in vitro* and *in vivo*, with pictures of the models in which each of them was tested and a brief comment on the result. The AlphaFold predicted structure of each PrP is also provided in the file in an interactive format when accessing through the <https://prpdex.com> webpage, with the quality of the prediction indicated (pLDDT score), as well as the relative thermodynamic stability calculated from the structure (expressed as  $\Delta\Delta G$ ), together with the experimentally determined melting temperature ( $T_m$ ) when available. The Source Data for  $T_m$  calculation is publicly available in Zenodo repository ([10.5281/zenodo.10579518](https://doi.org/10.5281/zenodo.10579518)) as detailed in the Data Availability section.

## **SUPPLEMENTARY METHODS**

### **Recombinant prion protein expression and purification**

This protocol provides a comprehensive guide to obtain recombinant prion protein, in our case from pOPIN E plasmids, but also from any other vector for recombinant protein expression in *Escherichia coli*. Taking advantage of the histidine rich Octapeptide Repeats (OR) of all rec-PrP variants, that allow their purification by immobilized metal affinity chromatography, we strongly recommend avoiding rec-PrP expression fused to any affinity tag, since they could interfere with the downstream misfolding proneness assessment. In our case, despite pOPIN E plasmids originally contained a N-ter 6x histidine tag to be expressed fused to the recombinant protein, a stop codon was introduced between the PrP and histidine tag sequences. With the PRNP sequence of each variant cloned under the control of the *operon lac* promoter region, recombinant protein expression is inducible through addition of isopropyl  $\beta$ -D-1-thiogalactopyranoside (IPTG). Our vectors also contain an ampicillin resistance cassette, although any other antibiotic resistance cassette can be used. All PrP sequences subjected to this study and cloned into the bacterial expression vectors were obtained either from genomic DNA through PCR or synthesized (by Nzytech and GeneScript). In all cases, they express the PrP from residues 23-231 (in bank vole PrP numbering) or equivalent positions for species with longer or shorter PrP sequences.

**Tip 1:** For a standard study on spontaneous misfolding, it is essential to work with complete proteins that lack N-terminal or C-terminal deletions and are free from any type of tag associated with either end of the protein. While proteins lacking a significant portion of the flexible N-ter region can also be used, their production and purification without any tags is more complex, and the yield is significantly lower.

## **Materials**

### **Chemicals**

- S.O.C culture media (Invitrogen)
- Ampicillin sodium salt (Sigma-Aldrich)
- Luria Bertoni (LB) agar (Becton Dickinson)
- Luria Bertoni (LB) broth (Condalab)
- Glycerol (Acros)
- Isopropyl  $\beta$ -D-1-thiogalactopyranoside (IPTG) (GoldBio)
- $MgCl_2$  (Sigma-Aldrich)
- NaCl (Fisher Chemicals)
- Tris(hydroxymethyl)aminomethane hydrochloride Sodium phosphate monobasic (Tris-HCl) (Fisher Bioreagents)
- Triton X-100 (Sigma-Aldrich)
- Phenylmethylsulfonyl fluoride (PMSF) (Sigma-Aldrich)
- Ethylenediaminetetraacetic acid (EDTA) (Sigma-Aldrich)
- Sodium lauroyl sarcosinate (Sarkosyl) (Sigma-Aldrich)
- Guanidine hydrochloride (Sigma-Aldrich)
- Imidazole (Sigma-Aldrich)

### **Biologicals**

- pOPIN E vectors containing the rec-PrP variant sequences (OPPE, gene synthesis and subcloning by Nzytech or GenScript)
- *Escherichia coli* Rossetta DE3 competent cells (Thermo Scientific)
- DNase (Sigma-Aldrich)
- Lysozyme (Sigma-Aldrich)



### Solutions and other preparations

- LB agar plates with 50 µg/ml of ampicillin sodium salt
- LB broth with 50 µg/ml of ampicillin sodium salt
- GeneJET Plasmid Miniprep Kit (ThermoFisher Scientific)
- IPTG stock solution (100 mM) in distilled water
- MgCl<sub>2</sub> stock solution (200 mM) in distilled water
- *DNase* stock solution (2 mg/ml) in distilled water
- Lysis buffer [Tris-HCl 50 mM, EDTA 5 mM, Triton X-100 1% (v/v), PMSF 1 mM, Lysozyme 2 mg/ml, pH 8]
- Washing buffer [Tris-HCl 20 mM, EDTA 1 mM, Sarkosyl 1 % (w/v), pH 8]
- Inclusion buffer [Tris-HCl 20 mM, NaCl 500 mM, Guanidinium-HCl 6 M, pH 8]
- Binding buffer [Tris-HCl 20 mM, NaCl 500 mM, Guanidinium-HCl 2 M, Imidazole 5 mM, pH 8]
- Elution buffer [Tris-HCl 20 mM, NaCl 500 mM, Guanidinium-HCl 2 M, Imidazole 500 mM, pH 8]
- Stripping buffer [Sodium phosphate 20 mM, NaCl 500 mM, EDTA 500 mM, pH 7.4]
- BlueSafe (Nzytech)
- NuPage 4x Loading Buffer (Invitrogen)

### Equipment

- Ice bucket
- Water bath set at 42 °C (JP Selecta)
- Laboratory oven set at 37 °C (Nahita)
- Petri dishes (Fisher Scientific)
- L-shaped spreader or autoclaved 5 mm diameter glass beads (Sigma-Aldrich)
- Bunsen burner
- 14 ml bacterial culture tubes (Simport)
- Shaking incubator for bacterial growth (Jeio Tech)
- 250 ml Erlenmeyer flasks
- 1 L Erlenmeyer flask
- Biowave Cell density meter CO8000 (WPA)
- 2.5 ml polystyrene disposable cuvettes (Labbox Labware)
- Sorvall Legend XTR centrifuge (Thermo Scientific)
- Swinging bucket rotor TX-750 (Thermo Scientific)
- FiberLite F15-6x100 fixed angle rotor (Thermo Scientific)
- 500 ml centrifugation bottles (Thermo Scientific)
- 50 ml centrifugation tubes (Thermo Scientific)
- HisTrap FF Crude 5 ml chromatographic columns (GE Healthcare)
- Nanodrop (ThermoFisher Scientific)
- 0.22 µm pore size cellulose acetate syringe filters (Corning)
- FPLC equipment, AKTA Start (GE Healthcare)
- Filter/Storage Bottle System, 0.22 µm. Cellulose Nitrate. 500ml (Corning) and vacuum pump

### **Methods**

#### Bacterial transformation by heat shock

1. Thaw the competent *E. coli* Rossetta DE3 cells carefully on ice. Keep them at 4 °C throughout the entire transformation process.
2. Mix 1 µl of the bacterial expression plasmid solution (100 ng/µl) with 9 µl of competent *E. coli* Rossetta DE3 cells.
3. Incubate the mixture on ice for 20 minutes.
4. Heat-shock the mixture by placing it in a water bath at 42 °C for 30 seconds.
5. Immediately return the mixture to ice and let it incubate for 5 minutes.
6. Add 90 µl of prewarmed S.O.C. culture media to the mixture.

7. Incubate the tube at 37 °C for 1 hour.
8. Take an LB agar plate with ampicillin and carefully pour 50 µl of the transformed bacteria solution into the center of the plate.
9. Using a sterile spreader or 3 mm sterile glass beads within the sterile area provided by a Bunsen burner, spread the solution evenly over the surface of the agar plate.
10. Incubate the agar plate overnight at 37 °C in a laboratory oven.
11. From the grown bacterial colonies on the agar plate, select at least one colony for inoculation.
12. Inoculate the selected colony into 2.5 ml of LB broth with ampicillin. This step is to check for the presence of the desired plasmid.
13. After incubating the bacterial culture overnight at 37 °C with vigorous shaking, perform a miniprep for plasmid extraction following the manufacturer's instructions.
14. Analyze the extracted plasmid using your preferred method. In our case, we use sequencing of the ORF of the PRNP cloned into the vector.
15. Once the correctness of the plasmid is confirmed, use the exact same colony to inoculate a new LB agar plate for immediate use.
16. Additionally, grow the colony again in 2.5 ml of LB broth with ampicillin for long-term storage at -80 °C. Mix 800 µl of the grown culture with 200 µl of glycerol to prepare glycerol stocks.

**Tip 2:** It is important to mix thoroughly using vortex, if necessary, the bacterial culture and glycerol mix and to freeze it immediately at -80 °C, since the glycerol induced toxicity can greatly reduce the living bacteria in the glycerol stock for subsequent purification.

#### Recombinant prion protein expression

17. Inoculate 50 ml of LB broth with 50 µg/ml of ampicillin placed in a 250 ml Erlenmeyer flask either from the agar plate or from the glycerol stock, under the Bunsen burner, and let this pre-culture grow at 37 °C with vigorous shaking overnight.
18. Once grown, add the pre-culture to 500 ml of LB broth with ampicillin and placed in a 1 L Erlenmeyer flask, and let the bacteria grow until the culture reaches an optical density (OD) between 0.8 and 1, measuring absorbance at 600 nm, which in our case takes normally about 2-3 h.
19. Once the desired OD is reached, recombinant protein expression is induced through addition of IPTG at a final concentration of 1 mM from the stock solution.
20. After induction, keep incubating the bacterial culture with vigorous shaking for 3 h at 37 °C for maximum recombinant prion protein expression yield. Alternatively, the culture can be kept overnight at 30 °C, also with vigorous shaking.
21. After expression, place the Erlenmeyer flasks in ice for 15 min and then transfer the culture to appropriate centrifuge tubes, in our case 500 ml centrifugation bottles, for centrifugation at 4,500 g for 15 min at 4 °C, to pellet the bacteria and separate them from the culture media.
22. Discard the supernatant and keep the bacterial pellet for purification. These bacterial pellets can be used immediately or stored at -20 °C for posterior purification.

#### Lysis of the bacterial pellets and solubilization of inclusion bodies

23. Suspend thoroughly the bacterial pellets using 50 ml of Lysis buffer and adding afterwards 37.5 µl of DNase from the stock solution for a final concentration of 5 µg/ml and 5.5 ml of the MgCl<sub>2</sub> stock solution for a final concentration of 20 mM.
24. Transfer the suspension to appropriate centrifugal tubes and incubate the suspension with gentle shaking for 30 min at room temperature.
25. After incubation, centrifuge the lysate at 8,500 g for 1 h at 4 °C.

26. Discard the supernatant and suspend the pellet in 50 ml of washing buffer until getting a homogeneous suspension, what we usually do in two parts, suspending first the pellet in 30 ml and adding the other 20 ml at the end.
27. Centrifuge the suspension in the same centrifugal tubes at 8,500 *g* for 1 h and 4 °C and discard the supernatant.
28. Carefully wash the pellet with distilled water to remove any residual detergents and debris adhering to the pellet and tube walls. Ensure thorough washing while avoiding suspension of the pellet. Discard the water, and then suspend the washed pellet in 12 ml of inclusion buffer.
29. Incubate the suspension at 37 °C with gentle shaking overnight. Consider covering the tubes with aluminum foil to protect the resuspended protein from excessive light exposure.

**Tip 3:** Throughout the protein preparation procedure, it is strongly advised to prevent protein oxidation. Therefore, exposure to light, especially during overnight processes, should be minimized. While the addition of DTT or other reducing agents is permissible, the potential impact of these agents on the final outcome remains unknown. Regardless, it is not recommended to use more than 1 mM of DTT during the purification process.

30. Centrifuge the suspension in the same centrifugal tubes at 8,500 *g* for 1 h and 4 °C and keep the supernatant in this case, discarding the pellet.
31. At this point the solubilized protein can be stored at -20 °C. Due to the inclusion buffer's resistance to freezing at this temperature, ensure the tube is covered with aluminum foil to protect from light exposure. If turbidity is observed, centrifuge the sample at 4,500 *g* for 15 min at 4 °C and keep the supernatant.
32. Filter the supernatant through a 0.22 µm pore-size syringe filter. If the filter clogs after 3-4 ml of solubilized protein, prefilter the protein with 5 µm pore-size syringe filter before using the 0.22 µm pore-size filter.

**Tip 4:** It is important to emphasize that protein filtration should always be performed before loading onto the AKTA system. This step is crucial to prevent aggregates from entering the column. Never filter the protein and then freeze it since this can lead to aggregate formation. The ideal practice is to filter and use the protein on the same day.

33. Take an aliquot of the lysate of 10 µl to monitor the lysis and purification process at the end.

#### Purification by immobilized metal affinity chromatography using FPLC equipment

34. An FPLC equipment with at least two separate valves is necessary for this procedure. For this study, we have used an AKTA Start equipment. Before starting purification, make sure that all valves to be used, tubing and HisTrap column are thoroughly washed with distilled water. For instance, 500 ml of LB-cultured bacteria usually results in approximately 12 ml of solubilized protein, and a 1 x HisTrap FF Crude 5 ml column should be used. If a larger quantity of protein, such as 3 liters of LB-cultured bacteria, needs purification, we advise using three

**Comment:** While we don't have a definitive explanation, it's a known fact that not all plasmids yield the same amount of protein, despite their similarity, even when working with genes that have been previously optimized for specific expression in *E. coli*. For this reason, there have been instances in which obtaining the required amount of protein for a comprehensive misfolding study has required up to 3 L, instead of the usual 500 ml.

interconnected 3 x HisTrap FF Crude 5 ml columns to prevent protein loss, as the column's protein-binding capacity is limited.

35. In the case of the valve used to load the sample in the column, perform an additional wash with inclusion buffer. Use 15 ml of water followed by 15 ml of inclusion buffer for this step.

36. Once the whole system, including the HisTrap column, is properly washed and equilibrated with water, place valve A in a bottle containing filtered binding buffer, and valve B in a bottle containing filtered elution buffer.
37. Equilibrate the HisTrap column with at least 5 column volumes (CV) of binding buffer.
38. Load the approximately 12 ml of the previously filtered supernatant derived from the bacterial lysate into the HisTrap column.
39. Collect the fraction(s) corresponding to the column loading to monitor the purification procedure, keeping at least 10  $\mu$ l for this purpose.
40. After loading the lysate into the column and collecting the "Loading" fractions, proceed with washing and elution steps. Begin with 7 CV of binding buffer (valve A) first and conclude with 10 CV of elution buffer (valve B). Note that no gradient is performed by mixing both buffers.
41. During elution, a distinct peak should be visible in the chromatogram at 280 nm corresponding to the purified protein. Mix all the fractions containing detectable protein by absorbance at 280 nm and reserve 10  $\mu$ l of the mixture to monitor the purification process.
42. Add guanidine-HCl to the elution fractions mixture to achieve a final concentration of 6 M (for instance, add 3.83 g of guanidine-HCl for every 10 ml of elution volume). Ensure the elution fraction mix is stored at 4 °C, protected from light.
43. Wash the valves, tubing, and HisTrap column with at least 10 CV of distilled water, and then switch to a 20 % ethanol solution if the equipment and HisTrap column are not going to be used immediately.
44. To reuse the chromatographic column with different prion protein variants, it is necessary to strip them and reload them with nickel. Follow these steps:

**Tip 5:** Reusing nickel columns is a common practice, especially when dealing with numerous proteins. However, it's important to note that despite their longevity, columns may eventually compromise the protein's ability to misfold consistently. This phenomenon is attributed to the gradual buildup of substances that resist complete removal during rigorous cleaning processes. Such accumulation may elevate the risk of protein oxidation or damage. To maintain optimal protein functionality, it is advisable not to exceed 10 reuse cycles for these columns, even if the purified protein appears indistinguishable from those obtained using less-utilized columns.

- a. Using the same FPLC equipment, introduce valve A in a bottle with distilled water, and valve B in a bottle containing stripping buffer.
  - b. Wash the tubing system and the column with 7 CV of distilled water (valve A), and then with 7 CV of stripping buffer (valve B).
  - c. Change valve B to a bottle containing binding buffer and wash the column with 7 CV of binding buffer (valve B), and then with 7 CV of distilled water (valve A).
  - d. Inject 5 ml of NiSO<sub>4</sub> solution to the column.
  - e. Wash the column again with 7 CV of distilled water (valve A), and then with 7 CV of binding buffer (valve B).
  - f. Transfer valves A and B to a bottle with 20 % ethanol solution. Wash valves, tubing, and column with 7 CV of 20 % ethanol. Disconnect the column from the FPLC equipment and seal the ends for long-term storage at 4 °C. Also, keep the valves in ethanol solution until the FPLC equipment is used again.
45. Precipitate the 10  $\mu$ l from the lysis, loading, and elution fractions collected by adding at least 60  $\mu$ l of ice-cold methanol to each sample in separate 1.5 ml Eppendorf tubes. Incubate the mixes for a minimum of 30 min at -20 °C.
  46. After incubation, centrifuge the samples at 20,000 *g* for 30 min to pellet the protein. Carefully discard the supernatant without disturbing the pellet. Allow the protein pellets to dry completely, and then resuspend them in 10 to 15  $\mu$ l of loading buffer to visualize them through electrophoresis and total protein staining.

47. Measure the concentration of the elution fraction mix by assessing absorbance at 280 nm. It is recommended using equipment like Nanodrop for this purpose.

48. If necessary, concentrate the eluted protein using centrifugal filter units with a cut-off of 10 kDa. Centrifuge at 4,500 *g* and 4 °C until reaching a concentration of 25 mg/ml.

**Comment:** The recommended storage concentration is 25 mg/ml. This selection is well-suited for subsequent substrate preparation. It's worth highlighting that protein concentration is a pivotal variable in achieving reliable results in spontaneous misfolding studies. As the rec-PrP misfolding *in vitro* is influenced by the concentration within the substrate, it is important to keep similar concentrations among the different substrates, always within a certain range as illustrated in Supplementary figure 2. While the impact of the final working concentration may vary among proteins, it exerts a more pronounced effect on those with limited misfolding capacity. Regardless, maintaining a precise record of the protein concentration at every stage of the procedure is of paramount importance.

49. Store the aliquots at -80°C until they are ready for use.

**Tip 6:** Although prion proteins are inherently stable, it is crucial to store them properly to maintain their integrity for spontaneous misfolding studies. Incorrect storage at -20°C, instead of -80°C, can lead to significant protein damage.

### **Substrate preparation for Protein Misfolding Shaking Amplification**

Once recombinant prion protein variants have been produced and purified, the critical next step in successfully implementing this technique in any laboratory is substrate preparation for PMSA. This involves dialyzing the protein, which is stored at -80 °C and with a 6 M of Gdn-HCl solution, to facilitate its re-folding into its native globular conformation. Subsequently, it is combined with other essential components of the substrate.

**Tip 7:** As mentioned previously, laboratories engaged in the production of prion proteins or similar proteins for various techniques, including amplification methods like RT-QuIC, or for their use in other biophysical techniques, are experienced in producing high-quality recombinant proteins through more sophisticated purification procedures. We firmly believe that to attain the reliable spontaneous misfolding results described in this study, it is of paramount importance for the protein to undergo refolding via dialysis, as detailed below. This approach ensures the production of high-quality protein, as demonstrated by the presence of a single, distinct band in the hundreds of purified and refolded proteins.

### **Materials**

#### **Chemicals**

- Triton-X-100 (Sigma-Aldrich)
- NaCl (Fisher Chemicals)
- PBS (HyClone)
- Guanidine hydrochloride (Gdn-HCl) (Sigma-Aldrich)
- BlueSafe (Nzytech)

#### **Solutions**

- Conversion Buffer (CB) [NaCl 0.15M, Triton-X-100 1% (v/v) in PBS]
- Dextran sulfate stock solution [Dextran sulfate 5% (w/v) in PBS]

#### **Biologicals**

- Dextran sulfate from *Leuconostoc spp.* 6,500-10,000 MW (Sigma-Aldrich)
- Purified rec-PrP

#### **Equipment**

- Dialysis cassettes (Thermo Scientific)
- Ice bucket
- 5 L beakers
- Magnetic stirrer and magnet
- 2 ml tubes with conical bottom and screw cap (Fisherbrand)
- Disposable pipettes and aspirator
- 1 mm diameter glass beads (BioSpec Products, Inc.)
- 0.1 mm diameter glass beads (BioSpec Products, Inc.)
- Centrifuge ST 16 R (Thermo Sorvall)

## **Methods**

### Dialysis of the rec-PrP for re-folding

1. Thaw 1 aliquot (100  $\mu$ l) of the rec-PrP on ice, transfer the completely thawed rec-PrP to a 5 ml Eppendorf tube and add 400  $\mu$ l of PBS to achieve an initial 1:5 dilution.

**Tip 8:** We recommend preparing this mixture by directly adding the denatured protein, which is in a 6 M Gdn HCl solution, to the PBS. The opposite approach is not recommended. This is because it has been observed that less protein precipitates, leading to a higher final yield.

2. Incubate the diluted protein on ice for 5-10 min at room temperature while preparing the rest of the materials for dialysis.
3. Prepare 5 L of PBS (for a 1:1,000 dilution) in a 5 L plastic beaker and wet the dialysis cassette membranes by immersing them in the PBS solution for 1 min.

**TIP 9:** While one might intuitively expect to work at ice-cold temperatures (4  $^{\circ}$ C), our experimental data suggest that performing dialysis at room temperature yields better results.

4. Introduce the diluted recombinant protein in the dialysis cassette using a 1 ml disposable pipette and submerge the cassette in the PBS solution with a magnetic stirrer for gentle agitation during dialysis.
5. Dialyze for 1 h at room temperature. Meanwhile, prepare 5 L of fresh PBS in another 5 L beaker.
6. After 1 h, transfer the cassette to the new beaker and continue dialysis for an additional 1 h (final dilution 1:1,000,000) with mild agitation at room temperature.
7. Extract the dialyzed rec-PrP from the cassette and transfer the dialyzed solution to 2 ml Eppendorf tubes for centrifugation at 19,000  $g$  for 15 min at 4  $^{\circ}$ C, to remove insoluble proteins.
8. Carefully collect the supernatant without disturbing the pellet and transfer them to a clean 2 ml Eppendorf tube.

**Comment:** This procedure is pivotal for the preparation of a suitable substrate, as the presence of potentially amorphous aggregates of proteins, or other insoluble impurities can profoundly influence the subsequent outcome of spontaneous misfolding. Performing it at 4  $^{\circ}$ C is recommended since it enhances the precipitation of aggregates overall.

### Preparation of the PMSA substrate

9. Mix the dialyzed and centrifuged recombinant protein with 4.5 ml of conversion buffer (CB) at a 1:9 dilution, maintaining the mixture on ice as long as possible.
10. After thoroughly mixing the protein and the CB, add 0.5 ml of the 5 % sulfated dextran solution to achieve a final concentration in the substrate of 0.5 % (w/v).

**Comment:** Throughout the study, we exclusively utilized a single cofactor, sulfated dextran. This choice stemmed from the fact that, despite initial testing of other similar cofactors with a limited number of different proteins, only sulfated dextran consistently and robustly facilitated spontaneous misfolding in conjunction with the other components.

11. Prepare a set of 2 ml tubes with conical bottoms and screw cap. Add 100 mg of 1 mm diameter glass beads to at least 16 tubes and 100 mg of 0.1 mm diameter glass beads to another set of at least 16 tubes.

**Comment:** One of the critical components that facilitate spontaneous misfolding is the inclusion of glass beads to the system. Our previous studies, which delved into understanding the mechanism through which the glass surfaces induce conformational changes, have made it very clear that careful attention must be paid not only to the size of the beads but also to their prior processing, along with other variables as described in the reference <sup>2</sup>. Therefore, we strongly recommend utilizing the same glass beads and adhering to the same conditions as outlined in this study.

12. Reserve 60 µl of the substrate for quality control in a separate Eppendorf tube. Aliquot the remaining substrate into the previously prepared 2 ml tubes with conical bottoms and screw caps placing 600 µl of substrate in each tube. Store the aliquoted substrate at -80 °C until needed for PMSA.
13. For the quality control, mix the reserved 60 µl of the substrate with 20 µl of electrophoresis loading buffer (4x) to reach a 1x concentration. Boil the mixture at 100 °C for 10 min and load it onto an electrophoresis gel along with the appropriate molecular weight marker.
14. Run the gel for 10 min at 70 V, 10 min at 110 V and 60 min at 150 V. Stain the gel with a total protein staining solution (e. g. BlueSafe) by placing the gel in a cuvette containing 50 ml of the staining solution. Incubate with gentle shaking at room temperature for 1 h.
15. Assess the protein amount (signal intensity) and quality (presence of a single band with expected size, absence of multimers or proteolytic fragments) based on the previous gel. Compare with other prepared substrates and, if the substrate meets the criteria for adequacy, it is considered suitable for PMSA.

**Comment:** The presence of a clearly discernible single band, approximately 20-23 kDa in size, after total protein staining is a reliable indicator of a high-quality protein with correct folding, as confirmed by circular dichroism studies. This condition is an indispensable requirement for initiate the studies on spontaneous misfolding.

**Tip 10:** It is advisable to carefully consider the purification method for the recombinant protein as it significantly influences the desired outcomes of protein misfolding. Purification via alternative methods, which involve protein folding within affinity columns with or without additional purification using HPLC, commonly employed in many laboratories for this protein, may not yield the same results for spontaneous protein misfolding studies.

**Tip 11:** We strongly discourage the process of lyophilization or any other procedures that could potentially facilitate the oxidation of methionine residues in the purified prion protein.

### **Protein Misfolding Shaking Amplification**

Once the substrate is prepared and protein concentration and quality have been evaluated through electrophoresis and total protein staining, unseeded PMSA reactions can be set to assess the misfolding proneness of each rec-PrP variant. These reactions are carried out in the presence of glass beads, as they play a crucial role in promoting spontaneous misfolding. Although other experimental designs could allow ranking rec-PrP variants in terms of misfolding proneness, we believe this approach

is the most cost-effective and provides enough resolution to distinguish among variants with differential misfolding capabilities. However, we acknowledge that increasing the number of replicates or conducting serial PMSA rounds, among other potential adjustments to the experimental setting, could lead to further discrimination between those variants with identical or similar scores according to our methodology. Additionally, as done in this work, those rec-PrP variants with all replicates negative for rec-PrP<sup>res</sup> and thus, apparently unable to misfold, should be repeated twice to confirm the negative results.

## **Materials**

### Chemicals

- BlueSafe (Nzytech)

### Biologicals

- PMSA substrates complemented with 1- and 0.1-mm diameter glass beads
- Proteinase K (PK) (Roche)

### Solutions

- Proteinase K stock solution at 10 µg/µl in MilliQ grade water

### Equipment

- Ice bucket
- Thermomixer (Eppendorf) or Digital shaking Drybath (Thermofisher Scientific)
- Centrifuge ST 16 R (Thermo Sorvall)

## **Methods**

### Unseeded serial PMSA rounds

1. Thaw four tubes of the substrate, each aliquoted with 1 mm diameter glass beads, and four tubes containing 0.1 mm glass beads, all kept in ice.
2. Label these tubes, indicating the rec-PrP variant, bead type, replicate tube (a to d), and the PMSA round (R01).
3. Place the labeled tubes in a shaker with temperature and shaking speed control, set at 39 °C and continuous shaking at 700 rpm for 24 h. We have used either a Thermomixer from Eppendorf or a Digital shaking Drybath from Thermofisher Scientific.

**Comment:** Although the study presented in this manuscript has been performed at 39 °C, previous data from our laboratory indicates that PMSA temperature is not pivotal and that similar results could be obtained working within a quite wide temperature range, from 35 to 40 °C.

4. After the first 24 h PMSA round, thaw another set of eight tubes of the aliquoted substrate in ice, again four with 1 mm diameter glass beads and four with 0.1 mm diameter glass beads. Properly label the tubes, indicating the rec-PrP variant, bead type, replicate (a to d), and this will be the second PMSA round (R02).
5. Inoculate this second set of tubes for the second round with 66 µl of the products from the first round. Perform a 1:10 dilution of the products from the first round in the new substrate, ensuring that each replicate is inoculated with the equivalent replicate from the previous round.



6. Place the newly inoculated tubes for the second round in the shaker at 39 °C and 700 rpm for 24 h.
7. Repeat the same procedure for the third and fourth PMSA rounds. Inoculate a new set of tubes with fresh substrate from the replicates of the previous round at 1:10 dilution and subject them to a 24 h PMSA round at 39 °C and continuous shaking at 700 rpm.

#### Assessment of rec-PrP<sup>res</sup> formation

8. Transfer 450 µl of each PMSA product to clean 1.5 ml eppendorf tubes for proteinase K digestion.
9. Add 11 µl of the 1 µg/µl PK solution to each sample, mixing gently to achieve a final concentration of 25 µg/ml.
10. Incubate the tubes for 1 h at 42 °C in a laboratory oven without shaking.
11. After the digestion, immediately centrifuge the samples at 19,000 g for 15 min and 4 °C and carefully discard the supernatant without disturbing the pellet.
12. Wash the pellets without resuspension by adding 500 µl of PBS and then centrifuge the samples at 19,000 g for 15 minutes at 4 °C. Resuspend the pellets in 16 µl of electrophoresis loading buffer previously diluted to 1x in PBS and boil them for 10 min at 100 °C to completely halt PK digestion.
13. Load 15 µl of the boiled samples onto an acrylamide gel and run the electrophoresis. In our case, use the following settings: at 70 V 10 min, at 110 V for another 10 min and at 150 V for 60 min.
14. Once the gel run is complete, stain the gel submerging it in 50 ml of BlueSafe for 1 h with mild agitation at room temperature for total protein staining.
15. For the interpretation of the results, based on our experience with *in vitro* misfolding of rec-PrP, only those samples displaying a 16 kDa band after PK digestion, electrophoresis, and staining are considered as rec-PrP<sup>res</sup> positive, regardless of smaller molecular weight fragments.

**Comment:** Despite our incomplete understanding of the spontaneous misfolding process and the resulting fragments observed during total protein staining, we consider the presence of a band spanning approximately from residues 90 to 230 to be a positive indicator of infectivity. However, it is worth noting that some conformers may produce only fragments, including those suggesting greater susceptibility to PK digestion in certain regions of the protein. While we cannot definitively establish a direct correlation between fragment types and infectivity, for the purposes of our study, we consider *bona fide* misfolding when the 16 kDa band is present, whether or not it is accompanied by smaller fragments.

**Tip 12:** Some of the critical parameters for replicating the results are both the speed and type of shaking. We have observed that shaking speeds below 500 rpm and above 1000 rpm have a negative impact on spontaneous misfolding. It cannot be ruled out that the optimal adjustment for consistent results may need to be made for each of the proteins used. Given the vast number of proteins tested and preliminary findings, it was agreed that a shaking speed of 700 rpm was suitable under these circumstances.

In addition to shaking speed, two other important factors are the type of shaking and the position of the tubes during shaking. Unfortunately, equipment allowing for variations in shaking type, some being broader and orbital than others, were not found. Since this can influence the results, it is recommended to work with the equipment described here or others with the same shaking specifications.

Furthermore, it has also been observed that positioning the tubes horizontally during shaking promotes spontaneous misfolding, likely due to providing a larger shaking surface area along with the beads. Regrettably, no commercial equipment options support this type of shaking with horizontally placed tubes. As a solution, we chose to create our own racks through 3D printing, which were used in simple shakers maintained at the appropriate temperature by placing them in an air oven.

## **Purification of rec-PrP<sup>res</sup> to be used as seeds in PMCA**

To assess if the rec-PrP<sup>res</sup> generated in PMSA could potentially induce a transmissible spongiform encephalopathy *in vivo*, we first evaluated their capacity to misfold brain-derived PrP<sup>C</sup> *in vitro*, a strong indicator of infectivity *in vivo*. Given the challenge of obtaining brain homogenates for the varied number of rec-PrP sequences to ascertain the capacity to misfold homologous PrP<sup>C</sup>, and aware that interspecies transmission barriers could lead to underestimate the potential infectious capacity of the rec-PrP<sup>res</sup>, we decided to employ TgVole brain homogenates as substrate. This transgenic mouse line, expressing the PrP<sup>C</sup> from bank vole with I109 polymorphism approximately 1-fold, as the bank voles themselves behave as universal acceptor of prions, being susceptible to a wide range of prion strains from distinct species.

**Comment:** This study can be conducted using brains from various sources that match the seed being tested or even human brains to assess transmission barriers in a straightforward manner.

To enhance the efficiency of the PMCA reactions seeded with rec-PrP<sup>res</sup>, we chose to concentrate the misfolded protein. However, to avoid problems due to excessive concentration of other components of the PMSA product, such as the cofactor or detergent, and considering that continuous shaking can lead to the release of bead fragments, we conducted a partial purification of the rec-PrP<sup>res</sup> by ultracentrifugation through a density gradient.

### **Materials**

#### Chemicals

- Cesium sulfate (Cs<sub>2</sub>SO<sub>4</sub>) (Sigma-Aldrich)
- PBS (HyClone)

#### Biologicals

- PMSA product containing rec-PrP<sup>res</sup>
- Perfused TgVole 1x brains
- Sha31 monoclonal anti-PrP antibody (Bertin Bioreagents)

#### Solutions

- 1 M and 1.7 M Cs<sub>2</sub>SO<sub>4</sub> solutions in distilled water
- Conversion buffer (CB) with Complete Protease inhibitor cocktail (Roche)

#### Equipment

- 15 ml gradient mixer (Sigma-Aldrich)
- Thinwall Ultra-Clear, 13.2 ml, centrifuge tubes (Beckman Coulter)
- SW41 Ti Swinging bucket rotor and corresponding buckets (Beckman Coulter)
- Optima L-90K ultracentrifuge (Beckman Coulter)

### **Methods**

#### Concentration and purification of rec-PrP<sup>res</sup> from PMSA products

1. Place 10 ml of a PMSA product resulting from a 24 h PMSA reaction to a 15 ml conical-bottom Falcon tube. Allow the protein aggregates sediment for at least 12 h at 4 °C. A white sediment should be observable at the bottom of the tube within a few hours.

2. Once sedimented, carefully discard the supernatant, reducing the volume of the suspension containing sedimented rec-PrP<sup>res</sup> to a minimum. Then, add PBS solution to reach a final volume of 2 ml.

**Comment:** After conducting studies on numerous preparations post-PMSA, it has been observed that, following 12 h of sedimentation without centrifugation, the high density of rec-PrP<sup>res</sup> causes it to precipitate completely. As a result, neither rec-PrP nor rec-PrP<sup>res</sup> can be detected in the supernatant.

3. Prepare a continuous density gradient of Cs<sub>2</sub>SO<sub>4</sub> using a gradient mixer with two chambers. Place at least 7 ml of a 1 M Cs<sub>2</sub>SO<sub>4</sub> solution in one chamber and a 1.7 M solution in the other, creating a final gradient ranging from 1 M at the top to 1.7 M at the bottom. Dispense the gradient (approximately 11.2 ml in total) in a Thinwall Ultra-Clear, 13.2 ml centrifuge tube.
4. Place the ultracentrifuge tube in the corresponding swinging bucket, close the lid, and ultracentrifuge the samples at 210,000 *g* for 15 h at 20 °C. In our case was performed using a SW41 Ti Swinging bucket rotor and an Optima L-90K ultracentrifuge.
5. After centrifugation, you should observe at least one white-colored halo within the gradient, where according to their density, most of the rec-PrP<sup>res</sup> is concentrated.
6. Carefully collect the fraction(s) containing visible precipitated protein halo with a pipette and transfer it to a new 5 ml Eppendorf tube for washing.

**Comment:** After conducting this purification process with more than 40 different conformers, we have observed significant variations in the appearance and position of the gradient halo. This behavior may be linked to the specific structural characteristics of each conformer. This information is crucial because, in some cases, it may be necessary to adjust the gradient type to prevent rec-PrP<sup>res</sup> from precipitating, thus ensuring successful purification.

7. Add MilliQ-grade water to the partially purified rec-PrP<sup>res</sup> until the 5 ml tube is filled to dilute the Cs<sub>2</sub>SO<sub>4</sub>. Centrifuge the sample at 4,000 *g* for 30 min at room temperature.
8. Discard almost all of the supernatant, leaving a small volume (approximately 50-100 µl) to resuspend the pellet. Transfer the suspended pellet to a new 1.5 ml Eppendorf tube for further washing.
9. Add 1 ml of PBS to the tube and thoroughly mix until complete resuspension is achieved. Centrifuge the tube for 15 min at 19,000 *g*. Repeat the PBS suspension and centrifugation step at least two additional times.
10. After the third wash, remove all of the supernatant and resuspend the pellet in 25-50 µl of PBS, adjusting the volume based on the final pellet size. This purified and concentrated rec-PrP<sup>res</sup> will be used as seed for the following PMCA reactions.

PMCA to assess the capacity of the rec-PrP<sup>res</sup> to misfold brain-derived PrP<sup>C</sup>

11. The PMCA procedure closely follows previously published methods<sup>3</sup> with minimal variations, and therefore will be briefly explained.
12. Prepare substrates using Glass/Teflon Potter Elvehjem homogenizers using perfused TgVole 1x brain homogenate at a concentration of 10 % (w/v) in conversion buffer supplemented with protease inhibitor cocktail. Aliquot the substrates into PCR tubes, with 50 µl per tube, and add 2-5 1 mm diameter zirconium silicate beads to each tube. Properly aliquoted substrate can be stored at -80 °C until its use.
13. Seed two substrate tubes or replicates at a 1:100 dilution with the previously purified rec-PrP<sup>res</sup> seed. Seal the tubes with parafilm to reduce cross-contamination and prevent accidental opening. Subject the tubes to a 24 h PMCA round with incubation cycles of 30 min, followed

by sonication pulses of 20 s at 80 % power at 38 °C regulated by a circulating water bath. Include at least two unseeded tubes as controls for cross-contamination or spontaneous misfolding.

14. After the first 24 h PMCA round, perform two additional serial PMCA rounds by seeding a set of freshly thawed substrate tubes at a 1:10 dilution with the PMCA product from the previous round, and again include unseeded controls. Conduct the second serial PMCA round under the same conditions as the first, also for 24 h.
15. Finally, carry out a third serial round using the same method, seeding a new set of substrate tubes at a 1:10 dilution with the product from the previous round.

**Comment:** The application of a highly reliable *in vitro* method such as PMCA proves to be of immense utility in evaluating the infectious potential of seeds purified using the proposed method. In this study, the decision was made to employ three rounds of PMCA for the scope of this investigation. Seeds that fail to propagate through brain derived PrP<sup>C</sup> after the third round are categorized as negative. However, it is worth noting that this criterion could be adjusted to include additional rounds to detect seeds with very low infectivity.

16. Assess the presence of brain derived PrP<sup>Sc</sup> in all replicates of each PMCA round by proteinase K digestion, electrophoresis, and Western blotting, as previously described <sup>2</sup>, using Sha31 (1:4000) as primary antibody.

## References

1. Eraña H, *et al.* Source Data Files from publication: A Protein Misfolding Shaking Amplification-based method for the spontaneous generation of hundreds of infectious prions, *Nature Communications* 2024. (2024).
2. Manka SW, *et al.* A structural basis for prion strain diversity. *Nat Chem Biol* **19**, 607-613 (2023).
3. Erana H, *et al.* Understanding the key features of the spontaneous formation of bona fide prions through a novel methodology that enables their swift and consistent generation. *Acta Neuropathol Commun* **11**, 145 (2023).

## List of reagents

| Reagent                                                                             | Company            | Catalog no. |
|-------------------------------------------------------------------------------------|--------------------|-------------|
| <i>E. coli</i> Rosetta™ (DE3) competent cells                                       | EMD Millipore      | 16440054    |
| Isopropyl β-D-1-thiogalactopyranoside (IPTG)                                        | Gold biotechnology | I2481C200   |
| S.O.C culture media                                                                 | Invitrogen         | 11528896    |
| Ampicillin sodium salt                                                              | Sigma-Aldrich      | A9518-25G   |
| Luria Bertoni (LB) agar                                                             | Becton Dickinson   | W5374D      |
| Luria Bertoni (LB) broth                                                            | Condalab           | 1231        |
| Glycerol                                                                            | Acros              | 10296200    |
| MgCl <sub>2</sub>                                                                   | Sigma-Aldrich      | M8266-100G  |
| NaCl                                                                                | Fisher Chemicals   | 10356340    |
| Tris(hydroxymethyl)aminomethane hydrochloride Sodium phosphate monobasic (Tris-HCl) | Fisher Bioreagents | 10001223    |
| Triton X-100                                                                        | Sigma-Aldrich      | T8787-250ML |

|                                                                     |                              |             |
|---------------------------------------------------------------------|------------------------------|-------------|
| Phenylmethylsulfonyl fluoride (PMSF)                                | Sigma-Aldrich                | 78830-5G    |
| Ethylenediaminetetraacetic acid (EDTA)                              | Sigma-Aldrich                | 03690-100ML |
| Sodium lauroyl sarcosinate (Sarkosyl)                               | Sigma-Aldrich                | L9150-250G  |
| Imidazole                                                           | Sigma-Aldrich                | I2399-500G  |
| Guanidine hydrochloride                                             | Sigma-Aldrich                | G4505-2KG   |
| DNase                                                               | Sigma-Aldrich                | DN25-100MG  |
| Lysozyme                                                            | Sigma-Aldrich                | 62971-50G-F |
| BlueSafe                                                            | Nzytech                      | MB15201     |
| NuPage 4x Loading Buffer                                            | Invitrogen                   | 11559166    |
| HisTrap FF Crude 5 ml chromatographic columns                       | (GE Healthcare)              | 11723219    |
| PBS                                                                 | (HyClone)                    | 1070-8334   |
| Dextran sulfate from <i>Leuconostoc spp.</i> 6,500-10,000 MW        | Sigma-Aldrich                | D4911-100G  |
| Proteinase K (PK)                                                   | Roche                        | 3115879001  |
| Cesium sulfate (Cs <sub>2</sub> SO <sub>4</sub> )                   | Sigma-Aldrich                | C3136-250G  |
| Sha31 monoclonal anti-PrP antibody                                  | Bertin Bioreagents           | A03213      |
| Complete Protease inhibitor cocktail                                | Roche                        | 11836145001 |
| 4-12 % acrylamide gels (NuPAGE Midi gel)                            | Invitrogen Life Technologies | WG1403BOX   |
| peroxidase-conjugated secondary anti-mouse antibody (m-IgGκ BP-HRP) | Santa Cruz Biotechnology     | sc-516102   |
| BCA assay                                                           | Thermo Scientific            | 10741395    |

**Supplementary table 1. List of 725 mammal species whose prion proteins have been analyzed in the study.**

| ORDER        | BINOMIAL NAME                            | COMMON NAME             | ACCESSION No. (Link)         |
|--------------|------------------------------------------|-------------------------|------------------------------|
| Afrosoricida | <i>Chrysochloris asiatica</i>            | Cape golden mole        | <a href="#">XM_006870413</a> |
|              | <i>Amblysomus hottentotus</i>            | Hottentot golden mole   | <a href="#">AY133061</a>     |
|              | <i>Echinops telfairi</i>                 | Lesser hedgehog tenrec  | <a href="#">BK064944</a>     |
|              | <i>Microgale talazaci</i>                | Talazac's shrew tenrec  | <a href="#">BK063959</a>     |
|              | <i>Tenrec ecaudatus</i>                  | Tailless tenrec         | <a href="#">AY133060</a>     |
| Artiodactyla | <i>Aepyceros melampus</i>                | Impala                  | <a href="#">BK063929</a>     |
|              | <i>Antilocapra americana</i>             | Pronghorn               | <a href="#">AF156187</a>     |
|              | <i>Antilope cervicapra</i>               | Blackbuck               | <a href="#">AY720706</a>     |
|              | <i>Antidorcas marsupialis</i>            | Springbok               | <a href="#">BK064068</a>     |
|              | <i>Eudorcas thomsonii</i>                | Thomson's gazelle       | <a href="#">EU032301</a>     |
|              | <i>Gazella dorcas</i>                    | Dorcas gazelle          | <a href="#">OR47264</a>      |
|              | <i>Gazella subgutturosa</i>              | Goitered gazelle        | <a href="#">AF117313</a>     |
|              | <i>Nanger dama</i>                       | Dama gazelle            | <a href="#">OR472459</a>     |
|              | <i>Nanger granti</i>                     | Grant's gazelle         | <a href="#">BK064108</a>     |
|              | <i>Procapra przewalskii</i>              | Przewalski's gazelle    | <a href="#">BK064131</a>     |
|              | <i>Babyrousa celebensis</i>              | North Sulawesi babirusa | <a href="#">BK064782</a>     |
|              | <i>Bos grunniens</i>                     | Domestic yak            | <a href="#">KC137646</a>     |
|              | <i>Bos taurus</i>                        | Cow                     | <a href="#">NM_181015</a>    |
|              | <i>Bison bison</i>                       | American bison          | <a href="#">AY720696</a>     |
|              | <i>Bison bonasus</i>                     | European bison          | <a href="#">EU032298</a>     |
|              | <i>Bos frontalis</i>                     | Gayal                   | <a href="#">AB534901</a>     |
|              | <i>Bos javanicus</i>                     | Banteng                 | <a href="#">AY720693</a>     |
|              | <i>Boselaphus tragocamelus</i>           | Nilgai                  | <a href="#">AY720700</a>     |
|              | <i>Bubalus bubalis</i>                   | Water buffalo           | <a href="#">MK342630</a>     |
|              | <i>Bubalus depressicornis</i>            | Anoa                    | <a href="#">BK063916</a>     |
|              | <i>Budorcas taxicolor</i>                | Takin                   | <a href="#">AB060290</a>     |
|              | <i>Camelus bactrianus ferus</i>          | Bactrian camel          | <a href="#">HQ204566</a>     |
|              | <i>Camelus dromedarius</i>               | Camel                   | <a href="#">Y09760</a>       |
|              | <i>Catagonus wagneri</i>                 | Chacoan peccary         | <a href="#">BK063918</a>     |
|              | <i>Dicotyles tajacu</i>                  | Collared peccary        | <a href="#">OR47262</a>      |
|              | <i>Cervus elaphus canadensis</i>         | Elk                     | <a href="#">EU032294</a>     |
|              | <i>Axis porcinus</i>                     | Indian hog deer         | <a href="#">BK063963</a>     |
|              | <i>Cervus nippon</i>                     | Sika deer               | <a href="#">EF057409</a>     |
|              | <i>Przewalskium albirostris</i>          | Thorold's deer          | <a href="#">BK064057</a>     |
|              | <i>Connochaetes taurinus</i>             | Blue wildebeest         | <a href="#">EF165086</a>     |
|              | <i>Connochaetes gnou</i>                 | Black wildebeest        | <a href="#">OR47263</a>      |
|              | <i>Dama dama</i>                         | Fallow deer             | <a href="#">EF139175</a>     |
|              | <i>Elaphurus davidianus</i>              | Père David's deer       | <a href="#">MW804583</a>     |
|              | <i>Giraffa camelopardalis reticulata</i> | Reticulata giraffe      | <a href="#">AF113942</a>     |
|              | <i>Hexaprotodon liberiensis</i>          | Pygmy hippopotamus      | <a href="#">AB919084</a>     |
|              | <i>Hippopotamus amphibius</i>            | Hippopotamus            | <a href="#">AB919083</a>     |
|              | <i>Hippotragus niger niger</i>           | Sable antelope          | <a href="#">BK064056</a>     |
|              | <i>Addax nasomaculatus</i>               | Addax                   | <a href="#">BK063914</a>     |
|              | <i>Beatragus hunteri</i>                 | Hirola                  | <a href="#">BK064028</a>     |
|              | <i>Damaliscus lunatus</i>                | Common tsessebe         | <a href="#">BK064037</a>     |
|              | <i>Hippotragus equinus</i>               | Roan antelope           | <a href="#">BK064055</a>     |
|              | <i>Oryx dammah</i>                       | Scimitar oryx           | <a href="#">BK064024</a>     |
|              | <i>Kobus ellipsiprymnus</i>              | Waterbuck               | <a href="#">EF165087</a>     |
|              | <i>Kobus megaceros</i>                   | Nile lechwe             | <a href="#">EF165088</a>     |
|              | <i>Kobus leche leche</i>                 | Lechwe                  | <a href="#">BK064060</a>     |
|              | <i>Litocranius walleri</i>               | Gerenuk                 | <a href="#">BK064079</a>     |
|              | <i>Cephalophus natalensis harveyi</i>    | Harvey's red duiker     | <a href="#">BK064031</a>     |
|              | <i>Madoqua kirkii</i>                    | Kirk's dik-dik          | <a href="#">BK064081</a>     |

## Artiodactyla

|                                 |                       |              |
|---------------------------------|-----------------------|--------------|
| <i>Neotragus moschatus</i>      | Suni                  | BK064111     |
| <i>Oreotragus oreotragus</i>    | Klipspringer          | BK064025     |
| <i>Ourebia ourebi</i>           | Oribi                 | BK064118     |
| <i>Moschus chrysogaster</i>     | Alpine musk deer      | AY723286     |
| <i>Moschus berezovskii</i>      | Dwarf musk deer       | BK064096     |
| <i>Saiga tatarica</i>           | Saiga antelope        | BK064016     |
| <i>Moschus moschiferus</i>      | Siberian musk deer    | BK063923     |
| <i>Muntiacus muntjak</i>        | Indian muntjac        | BK064098     |
| <i>Muntiacus reevesi</i>        | Reeves's muntjac      | KC788406     |
| <i>Muntiacus crinifrons</i>     | Hairy-fronted muntjac | BK064097     |
| <i>Muntiacus gongshanensis</i>  | Gongshan muntjac      | BK064177     |
| <i>Neotragus pygmaeus</i>       | Royal antelope        | BK064112     |
| <i>Odocoileus hemionus</i>      | Mule deer             | MT709729     |
| <i>Alces alces</i>              | Moose                 | MN970212     |
| <i>Capreolus capreolus</i>      | Roe deer              | AY639096     |
| <i>Capreolus pygargus</i>       | Siberian roe deer     | BK064073     |
| <i>Hydropotes inermis</i>       | Water deer            | MK103026     |
| <i>Odocoileus virginianus</i>   | White-tailed deer     | XM_020883647 |
| <i>Rangifer tarandus</i>        | Reindeer              | MW557845     |
| <i>Rucervus eldii thamin</i>    | Eld's deer            | OL961483     |
| <i>Okapia johnstoni</i>         | Okapi                 | BK064032     |
| <i>Oryx gazella</i>             | Gemsbok               | BK064117     |
| <i>Ovis aries</i>               | Sheep                 | NM_001009481 |
| <i>Ammotragus lervia</i>        | Barbary sheep         | EF165080     |
| <i>Capra falconeri</i>          | Markhor               | MG214330     |
| <i>Capra hircus</i>             | Goat                  | XM_005688157 |
| <i>Capra ibex</i>               | Alpine ibex           | EF139174     |
| <i>Capra pyrenaica</i>          | Iberian ibex          | KT845865     |
| <i>Capra sibirica</i>           | Siberian ibex         | BK063969     |
| <i>Capricornis crispus</i>      | Japanese serow        | MG214326     |
| <i>Hemitragus hylocrius</i>     | Nilgiri tahr          | BK064052     |
| <i>Hemitragus jayakari</i>      | Arabian tahr          | MG214331     |
| <i>Naemorhedus griseus</i>      | Chinese goral         | MG214329     |
| <i>Oreamnos americanus</i>      | Mountain goat         | EF999825     |
| <i>Ovibos moschatus</i>         | Muskox                | AF117320     |
| <i>Ovis ammon</i>               | Argali                | BK064119     |
| <i>Ovis dalli</i>               | Dall sheep            | DQ648474     |
| <i>Ovis nivicola lydekkeri</i>  | Snow sheep            | BK064120     |
| <i>Pantholops hodgsonii</i>     | Tibetan antelope      | BK064020     |
| <i>Pseudois nayaur</i>          | Bharal                | BK064132     |
| <i>Rupicapra pyrenaica</i>      | Pyrenean chamois      | KT845868     |
| <i>Ovis canadensis</i>          | Bighorn sheep         | DQ648476     |
| <i>Phacochoerus africanus</i>   | Common warthog        | BK063968     |
| <i>Potamochoerus porcus</i>     | Red river hog         | OR47265      |
| <i>Philantomba maxwellii</i>    | Maxwell's duiker      | BK064126     |
| <i>Procapra gutturosa</i>       | Mongolian gazelle     | AB473615     |
| <i>Raphicerus campestris</i>    | Steenbok              | BK064134     |
| <i>Redunca redunca</i>          | Bohor reedbuck        | BK064135     |
| <i>Sus scrofa</i>               | Pig                   | L07623       |
| <i>Sylvicapra grimmia</i>       | Common duiker         | BK064038     |
| <i>Syncerus caffer</i>          | African buffalo       | AY720686     |
| <i>Taurotragus oryx</i>         | Common eland          | EF165082     |
| <i>Tragelaphus angasii</i>      | Lowland nyala         | EU032296     |
| <i>Tragelaphus buxtoni</i>      | Mountain nyala        | BK064065     |
| <i>Tragelaphus imberbis</i>     | Lesser kudu           | AY720704     |
| <i>Tragelaphus scriptus</i>     | Harnessed bushbuck    | BK063937     |
| <i>Tragelaphus spekii</i>       | Sitatunga             | EF165083     |
| <i>Tragelaphus eurycerus</i>    | Bongo                 | BK064137     |
| <i>Tragelaphus strepsiceros</i> | Greater kudu          | EF165081     |
| <i>Tragulus javanicus</i>       | Java mouse-deer       | BK064004     |
| <i>Tragulus kanchil</i>         | Lesser mouse-deer     | BK064005     |

|                          |                                            |                          |              |
|--------------------------|--------------------------------------------|--------------------------|--------------|
| Artiodactyla             | <i>Vicugna vicugna</i>                     | Vicuna                   | BK063925     |
|                          | <i>Lama glama cacsilensis</i>              | Guanaco                  | BK064076     |
|                          | <i>Vicugna pacos</i>                       | Alpaca                   | XM_006207354 |
| Carnivora                | <i>Ailurus fulgens</i>                     | Red panda                | EU341495     |
|                          | <i>Arctictis binturong</i>                 | Binturong                | JX218945     |
|                          | <i>Paradoxurus hermaphroditus</i>          | Asian palm civet         | BK063947     |
|                          | <i>Arctocephalus gazella</i>               | Antarctic fur seal       | BK064071     |
|                          | <i>Canis latrans</i>                       | Coyote                   | JX218953     |
|                          | <i>Chrysocyon brachyurus</i>               | Maned wolf               | JX218978     |
|                          | <i>Speothos venaticus</i>                  | Bush dog                 | JX218950     |
|                          | <i>Canis lupus familiaris</i>              | Dog                      | KY649563     |
|                          | <i>Canis mesomelas</i>                     | Black-backed jackal      | BK064772     |
|                          | <i>Caracal caracal</i>                     | Caracal                  | BK063932     |
|                          | <i>Catopuma temminckii</i>                 | Asian golden cat         | JX218947     |
|                          | <i>Crocuta crocuta</i>                     | Spotted hyena            | JX218985     |
|                          | <i>Hyaena hyaena</i>                       | Striped hyena            | BK064018     |
|                          | <i>Cryptoprocta ferox</i>                  | Fossa                    | BK063948     |
|                          | <i>Erignathus barbatus</i>                 | Bearded seal             | BK064769     |
|                          | <i>Felis silvestris catus</i>              | Cat                      | EU588730     |
|                          | <i>Felis chaus</i>                         | Jungle cat               | BK064169     |
|                          | <i>Felis nigripes</i>                      | Black-footed cat         | BK064047     |
|                          | <i>Otocolobus manul</i>                    | Pallas's cat             | BK064223     |
|                          | <i>Gulo gulo</i>                           | Wolverine                | EU341500     |
|                          | <i>Eira barbara</i>                        | Tayra                    | BK064178     |
|                          | <i>Martes flavigula</i>                    | Yellow-throated marten   | BK064787     |
|                          | <i>Martes foina</i>                        | Beech marten             | BK064788     |
|                          | <i>Martes martes</i>                       | European pine marten     | JX218964     |
|                          | <i>Martes zibellina</i>                    | Sable                    | BK063939     |
|                          | <i>Taxidea taxus jeffersonii</i>           | American badger          | BK064062     |
|                          | <i>Helogale parvula</i>                    | Common dwarf mongoose    | BK064051     |
|                          | <i>Herpestes javanicus</i>                 | Javan mongoose           | EU341501     |
|                          | <i>Leopardus geoffroyi</i>                 | Geoffroy's cat           | BK064182     |
|                          | <i>Leopardus tigrinus</i>                  | Oncilla                  | BK064829     |
|                          | <i>Leopardus wiedii</i>                    | Margay                   | JX218979     |
|                          | <i>Leptonychotes weddellii</i>             | Weddell seal             | XM_006744312 |
|                          | <i>Lycaon pictus</i>                       | African wild dog         | BK064019     |
|                          | <i>Lynx pardinus</i>                       | Iberian lynx             | BK064941     |
|                          | <i>Acinonyx jubatus</i>                    | Cheetah                  | XM_027069624 |
|                          | <i>Lynx canadensis</i>                     | Canada lynx              | XM_030310019 |
|                          | <i>Lynx lynx</i>                           | Eurasian lynx            | OR472456     |
|                          | <i>Prionailurus bengalensis euptilurus</i> | Leopard cat              | BK064130     |
|                          | <i>Prionailurus iriomotensis</i>           | Iriomote cat             | BK064141     |
|                          | <i>Prionailurus viverrinus</i>             | Fishing cat              | BK064149     |
|                          | <i>Puma concolor</i>                       | Cougar                   | XM_025932838 |
|                          | <i>Puma yagouarundi</i>                    | Jaguarundi               | BK064172     |
|                          | <i>Lynx rufus</i>                          | Bobcat                   | EU341503     |
|                          | <i>Mellivora capensis</i>                  | Honey badger             | BK064009     |
|                          | <i>Mephitis mephitis</i>                   | Skunk                    | EU341504     |
|                          | <i>Mirounga leonina</i>                    | Southern elephant seal   | XM_035005902 |
|                          | <i>Mirounga angustirostris</i>             | Northern elephant seal   | BK064093     |
|                          | <i>Monachus schauinslandi</i>              | Hawaiian monk seal       | XM_021689157 |
|                          | <i>Mungos mungo</i>                        | Banded mongoose          | BK064099     |
|                          | <i>Mustela erminea</i>                     | Stoat                    | EU341505     |
|                          | <i>Aonyx cinerea</i>                       | Asian small-clawed otter | BK064764     |
|                          | <i>Bassariscus astutus</i>                 | Ring-tailed cat          | BK064783     |
|                          | <i>Bassariscus sumichrasti</i>             | Cacomistle               | BK064784     |
| <i>Enhydra lutris</i>    | Sea otter                                  | XM_022494297             |              |
| <i>Lontra canadensis</i> | North American river otter                 | XM_032859119             |              |
| <i>Lutra lutra</i>       | European otter                             | JX218963                 |              |



|                     |                                      |                       |              |
|---------------------|--------------------------------------|-----------------------|--------------|
| Carnivora           | <i>Meles meles</i>                   | European badger       | JX218960     |
|                     | <i>Mustela lutreola</i>              | European mink         | OR472458     |
|                     | <i>Mustela nigripes</i>              | Black-footed ferret   | BK064188     |
|                     | <i>Mustela nivalis</i>               | Least weasel          | BK064157     |
|                     | <i>Nasua narica</i>                  | White-nosed coati     | BK064789     |
|                     | <i>Nasua nasua</i>                   | South American coati  | OR47267      |
|                     | <i>Procyon lotor</i>                 | Raccoon               | EU341510     |
|                     | <i>Pteronura brasiliensis</i>        | Giant otter           | BK064061     |
|                     | <i>Mustela putorius</i>              | Ferret                | BK064943     |
|                     | <i>Neovison vison</i>                | American mink         | EF508270     |
|                     | <i>Odobenus rosmarus</i>             | Walrus                | EU341508     |
|                     | <i>Arctocephalus forsteri</i>        | Australasian fur seal | BK064830     |
|                     | <i>Arctocephalus pusillus</i>        | Brown fur seal        | OR47268      |
|                     | <i>Arctocephalus townsendi</i>       | Guadalupe fur seal    | BK064775     |
|                     | <i>Callorhinus ursinus</i>           | Northern fur seal     | XM_025876616 |
|                     | <i>Eumetopias jubatus</i>            | Steller sea lion      | EU341498     |
|                     | <i>Otaria flavescens</i>             | Sea lion              | JX218981     |
|                     | <i>Zalophus californianus</i>        | California sea lion   | XM_027623145 |
|                     | <i>Panthera leo</i>                  | Lion                  | EU236260     |
|                     | <i>Neofelis diardi</i>               | Sunda clouded leopard | BK064215     |
|                     | <i>Neofelis nebulosa</i>             | Clouded leopard       | EU341506     |
|                     | <i>Panthera onca</i>                 | Jaguar                | JX218977     |
|                     | <i>Panthera pardus</i>               | Leopard               | XM_019462612 |
|                     | <i>Panthera tigris</i>               | Siberian tiger        | OR472455     |
|                     | <i>Panthera uncia</i>                | Snow leopard          | BK064798     |
|                     | <i>Phoca vitulina</i>                | Common seal           | EU341509     |
|                     | <i>Cystophora cristata</i>           | Hooded seal           | JX218976     |
|                     | <i>Halichoerus grypus</i>            | Grey seal             | BK064050     |
|                     | <i>Pagophilus groenlandicus</i>      | Harp seal             | JX218971     |
|                     | <i>Phoca largha</i>                  | Spotted seal          | BK064792     |
|                     | <i>Pusa sibirica</i>                 | Baikal seal           | BK064225     |
|                     | <i>Potos flavus</i>                  | Kinkajou              | BK063964     |
|                     | <i>Proteles cristata</i>             | Aardwolf              | BK064008     |
|                     | <i>Pusa hispida saimensis</i>        | Ringed seal           | BK064218     |
|                     | <i>Spilogale gracilis</i>            | Western spotted skunk | BK064000     |
|                     | <i>Spilogale putorius interrupta</i> | Eastern spotted skunk | BK064191     |
|                     | <i>Suricata suricatta</i>            | Meerkat               | XP_029772432 |
|                     | <i>Tremarctos ornatus</i>            | Spectacled bear       | BK064152     |
|                     | <i>Ursus arctos</i>                  | Brown bear            | JX218961     |
|                     | <i>Ailuropoda melanoleuca</i>        | Giant panda           | XM_034640276 |
|                     | <i>Helarctos malayanus</i>           | Sun bear              | OR47260      |
|                     | <i>Ursus americanus</i>              | Black bear            | EU341512     |
|                     | <i>Ursus maritimus</i>               | Polar bear            | BK063942     |
|                     | <i>Ursus thibetanus thibetanus</i>   | Black bear            | BK063926     |
|                     | <i>Vulpes vulpes</i>                 | Red fox               | XM_026012328 |
|                     | <i>Canis adustus</i>                 | Side-striped jackal   | BK064957     |
|                     | <i>Nyctereutes procyonoides</i>      | Raccoon dog           | EU341507     |
|                     | <i>Otocyon megalotis</i>             | Bat-eared fox         | BK064006     |
|                     | <i>Urocyon cinereoargenteus</i>      | Gray fox              | BK064774     |
|                     | <i>Urocyon littoralis</i>            | Island fox            | BK064773     |
|                     | <i>Vulpes corsac</i>                 | Corsac fox            | MN381732     |
|                     | <i>Vulpes lagopus</i>                | Arctic fox            | EU365392     |
| <i>Vulpes velox</i> | Swift fox                            | EU341513              |              |
| <i>Vulpes zerda</i> | Fennec fox                           | OR47269               |              |
| Cetacea             | <i>Balaenoptera physalus</i>         | Whale                 | DQ884475     |
|                     | <i>Balaenoptera acutorostrata</i>    | Common minke whale    | XM_007191701 |
|                     | <i>Balaenoptera bonaerensis</i>      | Antarctic minke whale | BK064027     |
|                     | <i>Balaenoptera borealis</i>         | Sei whale             | BK064828     |
|                     | <i>Balaenoptera edeni</i>            | Bryde's whale         | BK064766     |

|         |                                                 |                                 |              |
|---------|-------------------------------------------------|---------------------------------|--------------|
| Cetacea | <i>Balaenoptera musculus</i>                    | Blue whale                      | BK064013     |
|         | <i>Balaenoptera ricei</i>                       | Rice's whale                    | BK064217     |
|         | <i>Caperea marginata</i>                        | Pygmy right whale               | BK064226     |
|         | <i>Eschrichtius robustus</i>                    | Gray whale                      | BK064015     |
|         | <i>Eubalaena australis</i>                      | Southern right whale            | BK064770     |
|         | <i>Eubalaena glacialis</i>                      | North Atlantic right whale      | BK064771     |
|         | <i>Eubalaena japonica</i>                       | North Pacific right whale       | BK064042     |
|         | <i>Megaptera novaeangliae</i>                   | Humpback whale                  | BK064082     |
|         | <i>Delphinapterus leucas</i>                    | Beluga whale                    | XM_022556485 |
|         | <i>Lagenorhynchus acutus</i>                    | Atlantic white-sided dolphin    | BK064776     |
|         | <i>Lagenorhynchus albirostris</i>               | White-beaked dolphin            | BK064229     |
|         | <i>Monodon monoceros</i>                        | Narwhal                         | XM_029221065 |
|         | <i>Orcinus orca</i>                             | Orca                            | XM_012535450 |
|         | <i>Phocoena phocoena</i>                        | Harbour porpoise                | AB919069     |
|         | <i>Phocoenoides dalli</i>                       | Dall's porpoise                 | AB919068     |
|         | <i>Hyperoodon ampullatus</i>                    | Northern bottlenose whale       | BK064204     |
|         | <i>Inia geoffrensis</i>                         | Amazon river dolphin            | BK064059     |
|         | <i>Lagenorhynchus obliquidens</i>               | Pacific white-sided dolphin     | XM_027118243 |
|         | <i>Lipotes vexillifer</i>                       | Baiji                           | XM_007463977 |
|         | <i>Mesoplodon bidens</i>                        | Sowerby's beaked whale          | BK064083     |
|         | <i>Mesoplodon densirostris</i>                  | Blainville's beaked whale       | BK064778     |
|         | <i>Mesoplodon europaeus</i>                     | Gervais' beaked whale           | BK064779     |
|         | <i>Mesoplodon stejnegeri</i>                    | Stejneger's beaked whale        | BK064780     |
|         | <i>Neophocaena phocaenoides asiaeorientalis</i> | Narrow-ridged finless porpoise  | XM_024764249 |
|         | <i>Phocoena sinus</i>                           | Vaquita                         | XM_032605446 |
|         | <i>Physeter catodon</i>                         | Sperm whale                     | XM_007123285 |
|         | <i>Kogia breviceps</i>                          | Pygmy sperm whale               | AB919063     |
|         | <i>Kogia sima</i>                               | Dwarf sperm whale               | AB919064     |
|         | <i>Platanista gangetica</i>                     | South Asian river dolphin       | BK064007     |
|         | <i>Platanista minor</i>                         | South Asian river dolphin       | BK064144     |
|         | <i>Pontoporia blainvillei</i>                   | La Plata dolphin                | BK064129     |
|         | <i>Tursiops truncatus</i>                       | Dolphin                         | XM_019941481 |
|         | <i>Cephalorhynchus commersonii</i>              | Commerson's dolphin             | BK064767     |
|         | <i>Delphinus delphis</i>                        | Dolphin                         | DQ884473     |
|         | <i>Feresa attenuata</i>                         | Pygmy killer whale              | AB919061     |
|         | <i>Globicephala melas</i>                       | Long-finned pilot whale         | XM_030872630 |
|         | <i>Grampus griseus</i>                          | Dolphin                         | DQ884471     |
|         | <i>Peponocephala electra</i>                    | Melon-headed whale              | AB919067     |
|         | <i>Sousa chinensis</i>                          | Indo-Pacific humpback dolphin   | BK064136     |
|         | <i>Stenella attenuata</i>                       | Pantropical spotted dolphin     | BK064799     |
|         | <i>Stenella clymene</i>                         | Clymene dolphin                 | BK064800     |
|         | <i>Stenella coeruleoalba</i>                    | Dolphin                         | DQ884470     |
|         | <i>Stenella frontalis</i>                       | Atlantic spotted dolphin        | BK064801     |
|         | <i>Stenella longirostris</i>                    | Spinner dolphin                 | AB919073     |
|         | <i>Steno bredanensis</i>                        | Rough-toothed dolphin           | DQ884468     |
|         | <i>Tursiops aduncus</i>                         | Indo-Pacific bottlenose dolphin | AB919075     |
|         | <i>Ziphius cavirostris</i>                      | Ziphius                         | DQ884467     |

|            |                                    |                              |          |
|------------|------------------------------------|------------------------------|----------|
| Chiroptera | <i>Anoura caudifer</i>             | Tailed tailless bat          | BK064067 |
|            | <i>Antrozous pallidus</i>          | Pallid bat                   | BK064069 |
|            | <i>Artibeus jamaicensis</i>        | Jamaican fruit bat           | BK064072 |
|            | <i>Carollia perspicillata</i>      | Seba's short-tailed bat      | BK063935 |
|            | <i>Corynorhinus townsendii</i>     | Townsend's big-eared bat     | BK064211 |
|            | <i>Craseonycteris thonglongyai</i> | Kitti's hog-nosed bat        | BK063940 |
|            | <i>Cynopterus sphinx</i>           | Indian short-nosed fruit bat | AY133046 |
|            | <i>Cynopterus brachyotis</i>       | Lesser short-nosed fruit bat | BK063952 |
|            | <i>Desmodus rotundus</i>           | Common vampire bat           | BK064947 |
|            | <i>Eidolon helvum</i>              | Straw-coloured fruit bat     | BK064039 |
|            | <i>Eidolon dupreanum</i>           | Madagascan fruit bat         | BK064786 |
|            | <i>Eonycteris spelaea</i>          | Cave nectar bat              | BK064041 |

|            |                                        |                                  |                                 |          |
|------------|----------------------------------------|----------------------------------|---------------------------------|----------|
| Chiroptera | <i>Eptesicus fuscus</i>                | Big brown bat                    | BK064945                        |          |
|            | <i>Hipposideros armiger</i>            | Great roundleaf bat              | XM_019644637                    |          |
|            | <i>Hipposideros turpis pendleburyi</i> | Pendlebury's roundleaf bat       | BK064185                        |          |
|            | <i>Hipposideros galeritus</i>          | Cantor's roundleaf bat           | BK064054                        |          |
|            | <i>la io</i>                           | Great evening bat                | BK064208                        |          |
|            | <i>Lasiurus cinereus</i>               | Hoary bat                        | BK063928                        |          |
|            | <i>Corynorhinus rafinesquii</i>        | Rafinesque's big-eared bat       | BK064814                        |          |
|            | <i>Lasiurus borealis</i>               | Eastern red bat                  | BK064077                        |          |
|            | <i>Macroglossus sobrinus</i>           | Long-tongued fruit bat           | BK063991                        |          |
|            | <i>Macrotus californicus</i>           | California leaf-nosed bat        | AY133049                        |          |
|            | <i>Megaderma lyra</i>                  | Greater false vampire bat        | BK064080                        |          |
|            | <i>Micronycteris hirsuta</i>           | Hairy big-eared bat              | BK064088                        |          |
|            | <i>Miniopterus natalensis</i>          | Natal long-fingered bat          | XM_016212061                    |          |
|            | <i>Miniopterus schreibersii</i>        | Common bent-wing bat             | BK064092                        |          |
|            | <i>Molossus molossus</i>               | Velvety free-tailed bat          | KAF6472180                      |          |
|            | <i>Molossus alvarezi</i>               | Alvarez's mastiff bat            | BK064952                        |          |
|            | <i>Molossus rufus</i>                  | Northern black mastiff bat       | BK064213                        |          |
|            | <i>Mormoops blainvillei</i>            | Antillean ghost-faced bat        | BK063931                        |          |
|            | <i>Murina aurata feae</i>              | Little tube-nosed bat            | BK064100                        |          |
|            | <i>Myotis brandtii</i>                 | Brandt's bat                     | XM_005874678                    |          |
|            | <i>Myotis lucifugus</i>                | Little brown bat                 | XM_006096427                    |          |
|            | <i>Myotis davidii</i>                  | David's myotis                   | XM_006758058                    |          |
|            | <i>Myotis daubentonii</i>              | Daubenton's bat                  | AY133048                        |          |
|            | <i>Myotis myotis</i>                   | Greater mouse-eared bat          | BK064107                        |          |
|            | <i>Myotis ricketti</i>                 | Rickett's big-footed bat         | BK064146                        |          |
|            | <i>Myotis septentrionalis</i>          | Northern long-eared bat          | BK064803                        |          |
|            | <i>Myotis yumanensis</i>               | Yuma myotis                      | BK064222                        |          |
|            | <i>Noctilio leporinus</i>              | Greater bulldog bat              | BK064113                        |          |
|            | <i>Nycticeius humeralis</i>            | Evening bat                      | BK064115                        |          |
|            | <i>Phyllostomus discolor</i>           | Pale spear-nosed bat             | XP_035865486                    |          |
|            | <i>Pipistrellus kuhlii</i>             | Kuhl's pipistrelle               | XM_036417932                    |          |
|            | <i>Pipistrellus pipistrellus</i>       | Common pipistrelle               | BK064127                        |          |
|            | <i>Plecotus auritus</i>                | Lump-nosed bat                   | OR472453                        |          |
|            | <i>Pteronotus parnellii</i>            | Parnell's mustached bat          | BK063967                        |          |
|            | <i>Pteropus alecto</i>                 | Black flying fox                 | XM_015597302                    |          |
|            | <i>Pteropus medius</i>                 | Indian flying fox                | XM_039863787                    |          |
|            | <i>Pteropus pselaphon</i>              | Bonin flying fox                 | BK063965                        |          |
|            | <i>Pteropus rodricensis</i>            | Rodrigues flying fox             | BK064817                        |          |
|            | <i>Pteropus rufus</i>                  | Madagascan flying fox            | BK064809                        |          |
|            | <i>Pteropus vampyrus</i>               | Large flying fox                 | XM_011369934                    |          |
|            | <i>Rhinolophus ferrumequinum</i>       | Greater horseshoe bat            | BK063922                        |          |
|            | <i>Rhinolophus sinicus</i>             | Chinese rufous horseshoe bat     | BK063992                        |          |
|            | <i>Rousettus aegyptiacus</i>           | Egyptian fruit bat               | XM_016135122                    |          |
|            | <i>Rousettus leschenaultii</i>         | Leschenault's rousette           | BK063997                        |          |
|            | <i>Rousettus madagascariensis</i>      | Madagascan rousette              | BK064805                        |          |
|            | <i>Sturnira ludovici hondurensis</i>   | Honduran yellow-shouldered bat   | BK063970                        |          |
|            | <i>Tadarida brasiliensis</i>           | Mexican free-tailed bat          | BK064001                        |          |
|            | <i>Tonatia saurophila</i>              | Stripe-headed round-eared bat    | BK064003                        |          |
|            | <i>Phyllostomus hastatus</i>           | Greater spear-nosed bat          | BK064158                        |          |
|            | <i>Trachops cirrhosus</i>              | Fringe-lipped bat                | BK064958                        |          |
|            | Cingulata                              | <i>Cabassous unicinctus</i>      | Southern naked-tailed armadillo | BK064228 |
|            |                                        | <i>Chaetophractus vellerosus</i> | Screaming hairy armadillo       | BK064063 |
|            |                                        | <i>Euphractus sexcinctus</i>     | Six-banded armadillo            | OR47276  |
|            |                                        | <i>Dasypus novemcinctus</i>      | Nine-banded armadillo           | EU559337 |
|            |                                        | <i>Tolypeutes matacus</i>        | Southern three-banded armadillo | BK064002 |
|            | Dasyuromorphia                         | <i>Antechinus flavipes</i>       | Yellow-footed antechinus        | BK063971 |
|            |                                        | <i>Antechinus stuartii</i>       | Brown antechinus                | BK063930 |

|                              |                                              |                              |              |
|------------------------------|----------------------------------------------|------------------------------|--------------|
| Dasyuromorphia               | <i>Dasyurus hallucatus</i>                   | Northern quoll               | BK064760     |
|                              | <i>Dasyurus viverrinus</i>                   | Eastern quoll                | BK064810     |
|                              | <i>Myrmecobius fasciatus</i>                 | Numbat                       | BK064811     |
|                              | <i>Phascogale tapoatafa</i>                  | Brush-tailed phascogale      | BK064816     |
|                              | <i>Phascogale calura</i>                     | Red-tailed phascogale        | BK064832     |
|                              | <i>Sarcophilus harrisii</i>                  | Tasmanian devil              | XM_003757949 |
|                              | <i>Sminthopsis crassicaudata</i>             | Fat-tailed dunnart           | BK064171     |
|                              | <i>Thylacinus cynocephalus</i>               | Thylacine                    | BK064189     |
| <hr/>                        |                                              |                              |              |
| Dermoptera                   | <i>Galeopterus variegatus</i>                | Sunda flying lemur           | AY133034     |
|                              | <i>Cynocephalus volans</i>                   | Philippine flying lemur      | BK064216     |
| <hr/>                        |                                              |                              |              |
| Didelphimorphia              | <i>Didelphis virginiana</i>                  | Virginia opossum             | BK064768     |
|                              | <i>Gracilinanus agilis</i>                   | Agile gracile opossum        | BK063958     |
|                              | <i>Monodelphis domestica</i>                 | Opossum                      | NM_001040028 |
| <hr/>                        |                                              |                              |              |
| Diprotodontia                | <i>Bettongia penicillata ogilbyi</i>         | Woylie                       | BK064808     |
|                              | <i>Cercartetus concinnus</i>                 | Western pygmy possum         | BK064813     |
|                              | <i>Dendrolagus matschiei</i>                 | Matschie's tree-kangaroo     | BK064823     |
|                              | <i>Gymnobelideus leadbeateri</i>             | Leadbeater's possum          | BK064074     |
|                              | <i>Lagorchestes hirsutus</i>                 | Rufous hare-wallaby          | BK064777     |
|                              | <i>Macropus eugenii</i>                      | Wallaby                      | AY659988     |
|                              | <i>Macropus irma</i>                         | Western Brush Wallaby        | BK064824     |
|                              | <i>Macropus rufogriseus</i>                  | Red-necked wallaby           | OR47270      |
|                              | <i>Macropus giganteus</i>                    | Eastern grey kangaroo        | BK064781     |
|                              | <i>Macropus fuliginosus</i>                  | Western grey kangaroo        | BK064820     |
|                              | <i>Macropus rufus</i>                        | Red kangaroo                 | OR47271      |
|                              | <i>Petaurus breviceps</i>                    | Sugar glider                 | BK064219     |
|                              | <i>Petrogale xanthopus</i>                   | Yellow-footed rock-wallaby   | OR47266      |
|                              | <i>Wallabia bicolor</i>                      | Swamp wallaby                | BK064825     |
|                              | <i>Phalanger gymnotis</i>                    | Ground cuscus                | BK064791     |
|                              | <i>Phascolarctos cinereus</i>                | Koala                        | XM_020985342 |
|                              | <i>Potorous gilbertii</i>                    | Gilbert's potoroo            | BK064793     |
|                              | <i>Pseudocheirus peregrinus occidentalis</i> | Western ringtail             | BK064794     |
|                              | <i>Pseudocheirops corinnae</i>               | Plush-coated ringtail possum | BK064795     |
|                              | <i>Pseudocheirops cupreus</i>                | Coppery ringtail possum      | BK064796     |
| <i>Setonix brachyurus</i>    | Quokka                                       | BK064765                     |              |
| <i>Trichosurus vulpecula</i> | Common brushtail possum                      | L38993                       |              |
| <i>Vombatus ursinus</i>      | Common wombat                                | XM_027865324                 |              |
| <hr/>                        |                                              |                              |              |
| Erinaceomorpha               | <i>Atelerix albiventris</i>                  | Four-toed hedgehog           | OR47273      |
|                              | <i>Erinaceus europaeus</i>                   | European hedgehog            | EU572708     |
|                              | <i>Hylomys suillus</i>                       | Short-tailed gymnure         | AY133044     |
| <hr/>                        |                                              |                              |              |
| Hyracoidea                   | <i>Procavia capensis</i>                     | Rock hyrax                   | AY133057     |
|                              | <i>Heterohyrax brucei</i>                    | Yellow-spotted rock hyrax    | BK064053     |
| <hr/>                        |                                              |                              |              |
| Lagomorpha                   | <i>Lepus europaeus</i>                       | Brown hare                   | OR472454     |
|                              | <i>Lepus americanus</i>                      | Snowshoe hare                | BK063972     |
|                              | <i>Lepus timidus</i>                         | Mountain hare                | BK063973     |
|                              | <i>Lepus townsendii</i>                      | White-tailed jackrabbit      | BK064227     |
|                              | <i>Ochotona princeps</i>                     | American pika                | EU555402     |
|                              | <i>Ochotona curzoniae</i>                    | Plateau pika                 | MT371369     |
|                              | <i>Oryctolagus cuniculus</i>                 | Rabbit                       | NM_001082021 |
| <i>Sylvilagus bachmani</i>   | Brush rabbit                                 | BK063974                     |              |

|                  |                                            |                            |              |
|------------------|--------------------------------------------|----------------------------|--------------|
| Lagomorpha       | <i>Sylvilagus transitionalis</i>           | New England cottontail     | BK064962     |
| Macroscelidea    | <i>Elephantulus edwardii</i>               | Cape elephant shrew        | XM_006894222 |
|                  | <i>Macroscelides proboscideus</i>          | Round-eared elephant shrew | AY133059     |
| Microbiotheria   | <i>Dromiciops gliroides</i>                | Colocolo opossum           | BK064161     |
|                  | <i>Dromiciops bozinovici</i>               | Pancho's colocolo opossum  | OR47274      |
| Monotremata      | <i>Ornithorhynchus anatinus</i>            | Platypus                   | XM_029065640 |
|                  | <i>Tachyglossus aculeatus</i>              | Short-beaked echidna       | BK063950     |
| Notoryctemorphia | <i>Notoryctes typhlops</i>                 | Southern marsupial mole    | BK064812     |
| Perissodactyla   | <i>Ceratotherium simum simum</i>           | Southern white rhinoceros  | XM_014790100 |
|                  | <i>Dicerorhinus sumatrensis harrissoni</i> | Bornean rhinoceros         | BK063994     |
|                  | <i>Diceros bicornis</i>                    | Black rhinoceros           | AY133052     |
|                  | <i>Rhinoceros unicornis</i>                | White rhinoceros           | BK064948     |
|                  | <i>Equus asinus</i>                        | Asinus                     | BK064942     |
|                  | <i>Equus africanus</i>                     | African wild ass           | OR47283      |
|                  | <i>Equus caballus ferus</i>                | Horse                      | EU887260     |
|                  | <i>Equus burchellii</i>                    | Burchell's zebra           | EF165074     |
|                  | <i>Equus grevyi</i>                        | Grévy's zebra              | BK064961     |
|                  | <i>Equus kiang</i>                         | Kiang                      | EF165076     |
|                  | <i>Equus quagga boehmi</i>                 | Grant's zebra              | AF117329     |
|                  | <i>Equus zebra hartmannae</i>              | Mountain zebra             | EF165073     |
|                  | <i>Equus caballus przewalskii</i>          | Przewalski's horse         | XM_008519788 |
|                  | <i>Tapirus indicus</i>                     | Malayan tapir              | BK063977     |
|                  | <i>Tapirus terrestris</i>                  | South American tapir       | BK063978     |
|                  | <i>Tapirus bairdii</i>                     | Baird's tapir              | BK064815     |
| Pholidota        | <i>Manis javanica</i>                      | Pangolin                   | XM_017663893 |
|                  | <i>Manis crassicaudata</i>                 | Chinese pangolin           | BK063961     |
|                  | <i>Manis pentadactyla</i>                  | Chinese pangolin           | BK063962     |
|                  | <i>Manis tricuspis</i>                     | Tree pangolin              | BK063960     |
| Pilosa           | <i>Bradypus variegatus</i>                 | Brown-throated sloth       | BK063934     |
|                  | <i>Choloepus didactylus</i>                | Linnaeus's two-toed sloth  | BK063945     |
|                  | <i>Choloepus hoffmanni</i>                 | Hoffmann's two-toed sloth  | BK063946     |
|                  | <i>Cyclopes didactylus</i>                 | Silky anteater             | AY133063     |
|                  | <i>Myrmecophaga tridactyla</i>             | Giant anteater             | BK063979     |
|                  | <i>Tamandua tetradactyla</i>               | Southern tamandua          | BK063980     |
| Primates         | <i>Alouatta belzebul</i>                   | Red-handed howler          | AY765382     |
|                  | <i>Alouatta palliata</i>                   | Mantled howler             | BK064066     |
|                  | <i>Aotus lemurinus</i>                     | Gray-bellied night monkey  | AY765387     |
|                  | <i>Aotus nancymaae</i>                     | Nancy Ma's night monkey    | XM_012455393 |
|                  | <i>Aotus trivirgatus</i>                   | Three-striped night monkey | U08293       |
|                  | <i>Ateles geoffroyi</i>                    | Geoffroy's spider monkey   | U08309       |
|                  | <i>Ateles hybridus</i>                     | Brown spider monkey        | BK064173     |
|                  | <i>Ateles paniscus</i>                     | Red-faced spider monkey    | U15164       |
|                  | <i>Brachyteles arachnoides</i>             | Southern muriqui           | AY765383     |
|                  | <i>Callicebus donacophilus</i>             | White-eared titi           | BK064142     |
|                  | <i>Callicebus moloch</i>                   | Red-bellied titi           | U08312       |

## Primates

|                                          |                                   |                              |
|------------------------------------------|-----------------------------------|------------------------------|
| <i>Callithrix jacchus</i>                | Common marmoset                   | <a href="#">XM_008995703</a> |
| <i>Callimico goeldii</i>                 | Goeldi's marmoset                 | <a href="#">AY765390</a>     |
| <i>Callithrix argentata</i>              | Silvery marmoset                  | <a href="#">OR47282</a>      |
| <i>Callithrix geoffroyi</i>              | White-headed marmoset             | <a href="#">OR47261</a>      |
| <i>Callithrix pygmaea</i>                | Pygmy marmoset                    | <a href="#">AY765392</a>     |
| <i>Cebus capucinus</i>                   | Panamanian white-faced capuchin   | <a href="#">XM_017524036</a> |
| <i>Cebus albifrons</i>                   | Humboldt's white-fronted capuchin | <a href="#">BK064029</a>     |
| <i>Cebus apella</i>                      | Tufted capuchin                   | <a href="#">XM_032295507</a> |
| <i>Cercocebus atys</i>                   | Sooty mangabey                    | <a href="#">XM_012052159</a> |
| <i>Cercocebus torquatus</i>              | Collared mangabey                 | <a href="#">U75385</a>       |
| <i>Cheirogaleus medius</i>               | Fat-tailed dwarf lemur            | <a href="#">BK063936</a>     |
| <i>Chiropotes satanas</i>                | Black bearded saki                | <a href="#">AY765380</a>     |
| <i>Cacajao calvus</i>                    | Bald uakari                       | <a href="#">AY765381</a>     |
| <i>Colobus angolensis palliatus</i>      | Angola colobus                    | <a href="#">XM_011941048</a> |
| <i>Colobus guereza</i>                   | Mantled guereza                   | <a href="#">U75389</a>       |
| <i>Nasalis larvatus</i>                  | Proboscis monkey                  | <a href="#">BK064109</a>     |
| <i>Ptilocolobus tephrosceles</i>         | Ugandan red colobus               | <a href="#">XM_023217934</a> |
| <i>Pygathrix nemaeus</i>                 | Red-shanked douc                  | <a href="#">BK064133</a>     |
| <i>Pygathrix nigripes</i>                | Black-shanked douc                | <a href="#">BK064197</a>     |
| <i>Rhinopithecus bieti</i>               | Black snub-nosed monkey           | <a href="#">XM_017878075</a> |
| <i>Rhinopithecus roxellana</i>           | Golden snub-nosed monkey          | <a href="#">BK063920</a>     |
| <i>Rhinopithecus strykeri</i>            | Myanmar snub-nosed monkey         | <a href="#">BK064200</a>     |
| <i>Semnopithecus entellus</i>            | Northern plains gray langur       | <a href="#">BK064033</a>     |
| <i>Trachypithecus francoisi</i>          | François' langur                  | <a href="#">XM_033185731</a> |
| <i>Trachypithecus phayrei crepuscula</i> | Phayre's leaf monkey              | <a href="#">BK064195</a>     |
| <i>Daubentonia madagascariensis</i>      | Aye-aye                           | <a href="#">BK064012</a>     |
| <i>Galago moholi</i>                     | Mohol bushbaby                    | <a href="#">BK064194</a>     |
| <i>Gorilla gorilla</i>                   | Western gorilla                   | <a href="#">U08300</a>       |
| <i>Homo sapiens</i>                      | Human                             | <a href="#">NM_001080123</a> |
| <i>Hoolock leuconedys</i>                | Eastern hoolock gibbon            | <a href="#">BK064201</a>     |
| <i>Indri indri</i>                       | Indri                             | <a href="#">BK064058</a>     |
| <i>Lagothrix lagotricha</i>              | Brown woolly monkey               | <a href="#">AY765384</a>     |
| <i>Leontopithecus rosalia</i>            | Golden lion tamarin               | <a href="#">BK063917</a>     |
| <i>Loris tardigradus</i>                 | Golden-headed lion tamarin        | <a href="#">BK064822</a>     |
| <i>Loris tardigradus</i>                 | Red slender loris                 | <a href="#">BK064198</a>     |
| <i>Macaca nemestrina</i>                 | Pigtail macaque                   | <a href="#">XM_011741222</a> |
| <i>Allenopithecus nigroviridis</i>       | Allen's swamp monkey              | <a href="#">BK064763</a>     |
| <i>Cercopithecus albogularis</i>         | Sykes' monkey                     | <a href="#">BK064193</a>     |
| <i>Cercopithecus diana</i>               | Guenons                           | <a href="#">U08292</a>       |
| <i>Cercopithecus mona</i>                | Mona monkey                       | <a href="#">U75386</a>       |
| <i>Cercopithecus neglectus</i>           | DeBrazza's monkey                 | <a href="#">U75387</a>       |
| <i>Chlorocebus aethiops</i>              | Vervet monkey                     | <a href="#">U08291</a>       |
| <i>Chlorocebus sabaeus</i>               | Green monkey                      | <a href="#">XM_008019068</a> |
| <i>Erythrocebus patas</i>                | Patas monkey                      | <a href="#">U75388</a>       |
| <i>Lophocebus aterrimus</i>              | Black crested mangabey            | <a href="#">U75384</a>       |
| <i>Macaca arctoides</i>                  | Stump-tailed macaque              | <a href="#">U08311</a>       |
| <i>Macaca assamensis</i>                 | Assam macaque                     | <a href="#">EF455529</a>     |
| <i>Macaca cyclopis</i>                   | Formosan rock macaque             | <a href="#">BK064212</a>     |
| <i>Macaca fascicularis</i>               | Crab-eating macaque               | <a href="#">U08298</a>       |
| <i>Macaca fuscata</i>                    | Japanese macaque                  | <a href="#">U08301</a>       |
| <i>Macaca mulatta</i>                    | Rhesus macaque                    | <a href="#">NM_001047152</a> |
| <i>Macaca silenus</i>                    | Lion-tailed macaque               | <a href="#">BK064196</a>     |
| <i>Macaca sylvanus</i>                   | Barbary macaque                   | <a href="#">U75382</a>       |
| <i>Papio anubis</i>                      | Olive baboon                      | <a href="#">XM_031656585</a> |
| <i>Papio hamadryas</i>                   | Hamadryas baboon                  | <a href="#">U08294</a>       |
| <i>Papio papio</i>                       | Guinea baboon                     | <a href="#">BK064790</a>     |
| <i>Mandrillus leucophaeus</i>            | Drill                             | <a href="#">XM_011975232</a> |
| <i>Mandrillus sphinx</i>                 | Mandrill                          | <a href="#">U08303</a>       |
| <i>Microcebus murinus</i>                | Gray mouse lemur                  | <a href="#">NM_001309920</a> |
| <i>Microcebus griseorufus</i>            | Reddish-gray mouse lemur          | <a href="#">BK064084</a>     |
| <i>Microcebus mittermeieri</i>           | Mittermeier's mouse lemur         | <a href="#">BK064085</a>     |

|                        |                                 |                                 |                |          |
|------------------------|---------------------------------|---------------------------------|----------------|----------|
| Primates               | <i>Microcebus tavaratra</i>     | Northern rufous mouse lemur     | BK064087       |          |
|                        | <i>Microcebus ravelobensis</i>  | Golden-brown mouse lemur        | BK064086       |          |
|                        | <i>Miopithecus talapoin</i>     | Angolan talapoin                | BK064818       |          |
|                        | <i>Mirza coquereli</i>          | Coquerel's giant mouse lemur    | BK064094       |          |
|                        | <i>Mirza zaza</i>               | Northern giant mouse lemur      | BK064095       |          |
|                        | <i>Nycticebus coucang</i>       | Sunda slow loris                | BK064114       |          |
|                        | <i>Nycticebus bengalensis</i>   | Bengal slow loris               | BK064202       |          |
|                        | <i>Nycticebus pygmaeus</i>      | Pygmy slow loris                | OR47281        |          |
|                        | <i>Otolemur garnettii</i>       | Northern greater galago         | XM_003788036   |          |
|                        | <i>Pan troglodytes</i>          | Chimpanzee                      | U08296         |          |
|                        | <i>Hylobates agilis</i>         | Agile gibbon                    | BK064785       |          |
|                        | <i>Hylobates lar</i>            | Lar gibbon                      | U08299         |          |
|                        | <i>Hylobates moloch</i>         | Silvery gibbon                  | XM_032143110   |          |
|                        | <i>Hylobates muelleri</i>       | Müller's gibbon                 | OR472457       |          |
|                        | <i>Hylobates pileatus</i>       | Pileated gibbon                 | BK064186       |          |
|                        | <i>Nomascus leucogenys</i>      | Northern white-cheeked gibbon   | XM_012511857   |          |
|                        | <i>Nomascus siki</i>            | Southern white-cheeked gibbon   | BK064199       |          |
|                        | <i>Pan paniscus</i>             | Bonobo                          | BK064946       |          |
|                        | <i>Symphalangus syndactylus</i> | Siamang                         | U08308         |          |
|                        | <i>Pithecia irrorata</i>        | Rio Tapajós saki                | AY765379       |          |
|                        | <i>Pithecia pithecia</i>        | White-faced saki                | BK064128       |          |
|                        | <i>Pongo pygmaeus</i>           | Bornean orangutan               | U08305         |          |
|                        | <i>Pongo abelii</i>             | Sumatran orangutan              | XM_009233395   |          |
|                        | <i>Prolemur simus</i>           | Greater bamboo lemur            | BK063921       |          |
|                        | <i>Eulemur albifrons</i>        | White-headed lemur              | OR47279        |          |
|                        | <i>Eulemur fulvus</i>           | Common brown lemur              | BK064044       |          |
|                        | <i>Eulemur macaco</i>           | Black lemur                     | BK064045       |          |
|                        | <i>Eulemur mongoz</i>           | Mongoose lemur                  | BK064802       |          |
|                        | <i>Lemur catta</i>              | Ring-tailed lemur               | BK064078       |          |
|                        | <i>Propithecus coquereli</i>    | Coquerel's sifaka               | XM_012639270   |          |
|                        | <i>Saguinus bicolor</i>         | Pied tamarin                    | AY765388       |          |
|                        | <i>Saguinus imperator</i>       | Emperor tamarin                 | BK064034       |          |
|                        | <i>Saguinus midas</i>           | Golden-handed tamarin           | BK064187       |          |
|                        | <i>Saimiri boliviensis</i>      | Black-capped squirrel monkey    | BK064035       |          |
|                        | <i>Saimiri sciureus</i>         | Squirrel monkey                 | U15165         |          |
|                        | <i>Tarsius syrichta</i>         | Philippine tarsier              | XM_021710036   |          |
|                        | <i>Cephalopachus bancanus</i>   | Horsfield's tarsier             | BK064214       |          |
|                        | <i>Theropithecus gelada</i>     | Gelada                          | XM_025399776   |          |
|                        | Proboscidea                     | <i>Loxodonta africana</i>       | Elephant       | EU588731 |
|                        |                                 | <i>Elephas maximus</i>          | Asian elephant | AY133055 |
| Rodentia               | <i>Acomys cahirinus</i>         | Cairo spiny mouse               | EF467171       |          |
|                        | <i>Allactaga bullata</i>        | Gobi jerboa                     | BK064143       |          |
|                        | <i>Aplodontia rufa</i>          | Mountain beaver                 | BK064070       |          |
|                        | <i>Apodemus fulvipectus</i>     | Steppe field mouse              | KF466953       |          |
|                        | <i>Arvicanthis niloticus</i>    | African grass rat               | XM_034493892   |          |
|                        | <i>Arvicola amphibius</i>       | European water vole             | BK063953       |          |
|                        | <i>Microtus gerbei</i>          | Gerbe's vole                    | OR47278        |          |
|                        | <i>Bandicota indica</i>         | Greater bandicoot rat           | KF466950       |          |
|                        | <i>Bandicota savilei</i>        | Savile's bandicoot rat          | KF466951       |          |
|                        | <i>Berylmys berdmorei</i>       | Small white-toothed rat         | KF466946       |          |
|                        | <i>Leopoldamys edwardsi</i>     | Edwards's long-tailed giant rat | KF466944       |          |
|                        | <i>Leopoldamys sabanus</i>      | Long-tailed giant rat           | KF466943       |          |
|                        | <i>Rattus exulans</i>           | Polynesian rat                  | KF466949       |          |
|                        | <i>Capromys pilorides</i>       | Desmarest's hutia               | BK064046       |          |
|                        | <i>Castor canadensis</i>        | North American beaver           | XM_020184027   |          |
|                        | <i>Cavia aperea</i>             | Brazilian guinea pig            | KM357834       |          |
| <i>Cavia porcellus</i> | Guinea pig                      | XM_003476602                    |                |          |

## Rodentia

|                                  |                              |              |
|----------------------------------|------------------------------|--------------|
| <i>Cavia tschudii</i>            | Montane guinea pig           | BK063938     |
| <i>Chinchilla lanigera</i>       | Long-tailed chinchilla       | XM_005380818 |
| <i>Coendou prehensilis</i>       | Brazilian porcupine          | OR47272      |
| <i>Cricetomys gambianus</i>      | Gambian pouched rat          | BK063941     |
| <i>Cricetomys ansorgei</i>       | Southern giant pouched rat   | BK064819     |
| <i>Cricetulus barabensis</i>     | Chinese hamster              | M33958       |
| <i>Cricetulus migratorius</i>    | Armenian hamster             | M33959       |
| <i>Cryptomys damarensis</i>      | Damaraland mole-rat          | XM_010607544 |
| <i>Cryptomys darlingi</i>        | Mashona mole-rat             | BK064181     |
| <i>Ctenodactylus gundi</i>       | Common gundi                 | BK063949     |
| <i>Ctenomys sociabilis</i>       | Social tuco-tuco             | BK063951     |
| <i>Dasyprocta punctata</i>       | Central American agouti      | BK063998     |
| <i>Dinomys branickii</i>         | Pacarana                     | BK063954     |
| <i>Dipodomys merriami</i>        | Merriam's kangaroo rat       | BK064205     |
| <i>Dipodomys ordii</i>           | Ord's kangaroo rat           | XM_013010955 |
| <i>Dipodomys spectabilis</i>     | Banner-tailed kangaroo rat   | BK064155     |
| <i>Dipodomys stephensi</i>       | Stephens' kangaroo rat       | BK064064     |
| <i>Dolichotis patagonum</i>      | Patagonian mara              | KM357833     |
| <i>Ellobius lutescens</i>        | Transcaucasian mole vole     | BK064014     |
| <i>Ellobius talpinus</i>         | Northern mole vole           | BK064040     |
| <i>Eospalax fontanierii</i>      | Chinese zokor                | BK064949     |
| <i>Erethizon dorsata</i>         | North American porcupine     | BK063957     |
| <i>Glaucomys volans</i>          | Southern flying squirrel     | BK064183     |
| <i>Glis glis</i>                 | Edible dormouse              | BK064048     |
| <i>Grammomys surdaster</i>       | African woodland thicket rat | XM_028757107 |
| <i>Graphiurus murinus</i>        | Woodland dormouse            | BK064049     |
| <i>Heterocephalus glaber</i>     | Naked mole-rat               | XM_004840771 |
| <i>Hydrochoerus hydrochaeris</i> | Capybara                     | KM357831     |
| <i>Kerodon rupestris</i>         | Rock cavy                    | KM357832     |
| <i>Hylomyscus alleni</i>         | Allen's wood mouse           | BK064167     |
| <i>Hystrix brachyura</i>         | Malayan porcupine            | BK063933     |
| <i>Hystrix cristata</i>          | Crested porcupine            | BK063944     |
| <i>Jaculus jaculus</i>           | Lesser Egyptian jerboa       | BK064939     |
| <i>Lophiomys imhausi</i>         | Maned rat                    | BK064153     |
| <i>Marmota flaviventris</i>      | Yellow-bellied marmot        | XM_027955665 |
| <i>Marmota monax</i>             | Groundhog                    | XM_046433852 |
| <i>Marmota vancouverensis</i>    | Vancouver Island marmot      | BK063989     |
| <i>Marmota marmota</i>           | Alpine marmot                | XM_015482632 |
| <i>Marmota himalayana</i>        | Himalayan marmot             | BK063993     |
| <i>Mastomys coucha</i>           | Southern multimammate mouse  | XM_031371966 |
| <i>Mastomys natalensis</i>       | Natal multimammate mouse     | BK064165     |
| <i>Tokudaia muenninki</i>        | Muennink's spiny rat         | BK064955     |
| <i>Tokudaia osimensis</i>        | Ryukyu spiny rat             | BK064210     |
| <i>Tokudaia tokunoshimensis</i>  | Tokunoshima spiny rat        | BK064956     |
| <i>Maxomys surifer</i>           | Red spiny rat                | KF466947     |
| <i>Mus pahari</i>                | Gairdner's shrewmouse        | XM_021192940 |
| <i>Meriones libycus</i>          | Libyan jird                  | BK064826     |
| <i>Meriones unguiculatus</i>     | Mongolian gerbil             | XM_021651076 |
| <i>Rhombomys opimus</i>          | Great gerbil                 | BK063996     |
| <i>Mesocricetus auratus</i>      | Syrian hamster               | AH001830     |
| <i>Mesocricetus brandti</i>      | Turkish hamster              | EU886369     |
| <i>Microtus agrestis</i>         | Field vole                   | AF367625     |
| <i>Microtus arvalis</i>          | Common vole                  | BK064089     |
| <i>Microtus fortis</i>           | Reed vole                    | BK064090     |
| <i>Microtus ochrogaster</i>      | Prairie vole                 | XM_005365568 |
| <i>Microtus oeconomus</i>        | Tundra vole                  | BK064091     |
| <i>Microtus oregoni</i>          | Creeping vole                | BK064150     |
| <i>Microtus pennsylvanicus</i>   | Meadow vole                  | GQ850541     |
| <i>Microtus californicus</i>     | California vole              | BK064221     |
| <i>Microtus montanus</i>         | Montane vole                 | BK064179     |
| <i>Microtus richardsoni</i>      | Water vole                   | BK064156     |



## Rodentia

|                                           |                                      |              |
|-------------------------------------------|--------------------------------------|--------------|
| <i>Mus musculus</i>                       | Mouse                                | NM_011170    |
| <i>Apodemus mystacinus</i>                | Eastern broad-toothed field mouse    | KF466942     |
| <i>Apodemus speciosus</i>                 | Large Japanese field mouse           | BK064145     |
| <i>Apodemus sylvaticus</i>                | Wood mouse                           | AF367623     |
| <i>Chiropodomys gliroides</i>             | Indomalayan pencil-tailed tree mouse | KF466945     |
| <i>Hydromys chrysogaster</i>              | Rakali                               | BK064827     |
| <i>Mastacomys fuscus</i>                  | Broad-toothed mouse                  | BK064762     |
| <i>Mus caroli</i>                         | Ryukyu mouse                         | XM_021185802 |
| <i>Mus cervicolor</i>                     | Fawn-colored mouse                   | KF466939     |
| <i>Mus cookii</i>                         | Cook's mouse                         | KF466940     |
| <i>Mus fragilicauda</i>                   | Sheath-tailed mouse                  | KF466956     |
| <i>Mus minutoides</i>                     | African pygmy mouse                  | BK064101     |
| <i>Mus spicilegus</i>                     | Steppe mouse                         | BK063924     |
| <i>Mus spretus</i>                        | Algerian mouse                       | BK064105     |
| <i>Praomys delectorum</i>                 | Delectable soft-furred mouse         | BK064166     |
| <i>Pseudomys desertor</i>                 | Desert mouse                         | BK064761     |
| <i>Pseudomys fumeus</i>                   | Smoky mouse                          | BK064821     |
| <i>Muscardinus avellanarius</i>           | Hazel dormouse                       | BK064106     |
| <i>Myocastor coypus</i>                   | Coypu                                | BK064010     |
| <i>Myodes gapperi</i>                     | Southern red-backed vole             | GQ850538     |
| <i>Myodes glareolus</i>                   | Bank vole                            | AF367624     |
| <i>Neodon shergylaensis</i>               | Shergylaensis vole                   | BK064207     |
| <i>Neotoma lepida</i>                     | Desert woodrat                       | BK064110     |
| <i>Octodon degus</i>                      | Common degu                          | XM_023718589 |
| <i>Octomys mimax</i>                      | Mountain viscacha rat                | BK064011     |
| <i>Ondatra zibethicus</i>                 | Muskrat                              | BK064026     |
| <i>Dicrostonyx torquatus</i>              | Arctic lemming                       | BK064224     |
| <i>Pedetes capensis</i>                   | South African springhare             | BK064021     |
| <i>Perognathus longimembris pacificus</i> | Little pocket mouse                  | BK064022     |
| <i>Peromyscus attwateri</i>               | Texas mouse                          | BK064023     |
| <i>Peromyscus nasutus</i>                 | Northern rock mouse                  | BK064804     |
| <i>Peromyscus californicus insignis</i>   | California mouse                     | BK064122     |
| <i>Peromyscus eremicus</i>                | Cactus mouse                         | BK064123     |
| <i>Peromyscus crinitus</i>                | Canyon mouse                         | BK064807     |
| <i>Peromyscus leucopus</i>                | White-footed mouse                   | XM_028878611 |
| <i>Abrothrix hirta</i>                    | Long-haired grass mouse              | BK064176     |
| <i>Abrothrix longipilis hirtus</i>        | Long-haired grass mouse              | BK064147     |
| <i>Onychomys torridus</i>                 | Southern grasshopper mouse           | XM_036185260 |
| <i>Peromyscus aztecus</i>                 | Aztec mouse                          | BK064121     |
| <i>Peromyscus melanophrys</i>             | Plateau mouse                        | BK064124     |
| <i>Peromyscus mexicanus</i>               | Mexican deer mouse                   | BK064125     |
| <i>Peromyscus polionotus subgriseus</i>   | Oldfield mouse                       | EF467170     |
| <i>Peromyscus maniculatus bairdii</i>     | Deer mouse                           | XM_006983992 |
| <i>Phodopus roborovskii</i>               | Roborovski hamster                   | OR47275      |
| <i>Petaurista alborufus</i>               | Red and white giant flying squirrel  | KM357835     |
| <i>Petromus typicus</i>                   | Dassie rat                           | BK063990     |
| <i>Phodopus campbelli</i>                 | Campbell's dwarf hamster             | EU886367     |
| <i>Phodopus sungorus</i>                  | Russian hamster                      | EU886368     |
| <i>Psammomys obesus</i>                   | Fat sand rat                         | BK063966     |
| <i>Rattus argentiventer</i>               | Ricefield rat                        | KF466955     |
| <i>Rattus norvegicus</i>                  | Brown rat                            | BK063913     |
| <i>Rattus losea</i>                       | Lesser ricefield rat                 | KF466954     |
| <i>Rattus nitidus</i>                     | Himalayan field rat                  | KF466952     |
| <i>Rattus rattus</i>                      | Rat                                  | XM_032904254 |
| <i>Rattus tanezumi</i>                    | Tanezumi rat                         | KF466948     |
| <i>Rhabdomys dilectus</i>                 | Mesic four-striped grass rat         | BK064164     |
| <i>Rhabdomys pumilio</i>                  | Four-striped grass mouse             | BK064232     |
| <i>Rhizomys pruinosus</i>                 | Hoary bamboo rat                     | BK063999     |
| <i>Rhynchomys soricoides</i>              | Mount Data shrew-rat                 | BK064163     |
| <i>Saxatilomys paulinae</i>               | Paulina's limestone rat              | KF466958     |
| <i>Sciurus carolinensis</i>               | Eastern gray squirrel                | BK064159     |

|                           |                                      |                                        |              |
|---------------------------|--------------------------------------|----------------------------------------|--------------|
| Rodentia                  | <i>Sciurus niger</i>                 | Fox squirrel                           | BK064184     |
|                           | <i>Sciurus stramineus</i>            | Guayaquil squirrel                     | KM357836     |
|                           | <i>Sciurus vulgaris</i>              | Red squirrel                           | AY133037     |
|                           | <i>Sciurus lis</i>                   | Japanese squirrel                      | FN678794     |
|                           | <i>Xerus inauris</i>                 | Cape ground squirrel                   | BK064148     |
|                           | <i>Sigmodon fulviventer</i>          | Tawny-bellied cotton rat               | AF117324     |
|                           | <i>Sigmodon hispidus</i>             | Hispid cotton rat                      | BK064036     |
|                           | <i>Spalax galili</i>                 | Upper Galilee Mountains blind mole-rat | XM_008835893 |
|                           | <i>Spermophilus beecheyi</i>         | California ground squirrel             | BK064192     |
|                           | <i>Spermophilus dauricus</i>         | Daurian ground squirrel                | BK063919     |
|                           | <i>Spermophilus parryii</i>          | Arctic ground squirrel                 | XM_026385776 |
|                           | <i>Spermophilus tridecemlineatus</i> | Thirteen-lined ground squirrel         | XM_005320503 |
|                           | <i>Cynomys gunnisoni</i>             | Gunnison's prairie dog                 | BK064140     |
|                           | <i>Cynomys ludovicianus</i>          | Black-tailed prairie dog               | OR47277      |
|                           | <i>Tamias sibiricus</i>              | Siberian chipmunk                      | BK064209     |
|                           | <i>Thomomys bottae</i>               | Botta's pocket gopher                  | BK064206     |
|                           | <i>Thryonomys swinderianus</i>       | Greater cane rat                       | BK064162     |
|                           | <i>Tympanoctomys barrerae</i>        | Plains viscacha rat                    | BK064138     |
|                           | <i>Typhlomys cinereus</i>            | Chinese pygmy dormouse                 | BK064190     |
|                           | <i>Uromys caudimaculatus</i>         | Giant white-tailed rat                 | BK064806     |
| <i>Xerus rutilus</i>      | Unstriped ground squirrel            | BK064797                               |              |
| <i>Zapus hudsonius</i>    | Meadow jumping mouse                 | BK064139                               |              |
| Scandentia                | <i>Tupaia belangeri chinensis</i>    | Chinese tree shrew                     | XM_006163978 |
|                           | <i>Tupaia tana</i>                   | Large treeshrew                        | AY133035     |
| Sirenia                   | <i>Dugong dugon</i>                  | Dugong                                 | BK063981     |
|                           | <i>Hydrodamalis gigas</i>            | Steller's sea cow                      | BK063982     |
|                           | <i>Trichechus manatus</i>            | West Indian manatee                    | AY133056     |
| Soricomorpha              | <i>Condylura cristata</i>            | Star-nosed mole                        | XM_012728373 |
|                           | <i>Crocidura russula</i>             | Greater white-toothed shrew            | OR47280      |
|                           | <i>Galemys pyrenaicus</i>            | Pyrenean desman                        | BK063927     |
|                           | <i>Scalopus aquaticus</i>            | Eastern mole                           | BK063985     |
|                           | <i>Solenodon paradoxus woodi</i>     | Hispaniolan solenodon                  | BK063984     |
|                           | <i>Sorex araneus</i>                 | Common shrew                           | BK064940     |
|                           | <i>Sorex maritimensis</i>            | Maritime shrew                         | BK064231     |
|                           | <i>Sorex cinereus</i>                | Cinereous shrew                        | BK063915     |
|                           | <i>Sorex fumeus</i>                  | Smoky shrew                            | BK064954     |
|                           | <i>Sorex palustris</i>               | American water shrew                   | BK064220     |
|                           | <i>Suncus etruscus</i>               | Etruscan shrew                         | BK064203     |
|                           | <i>Talpa europaea</i>                | European mole                          | AY133042     |
|                           | <i>Talpa occidentalis</i>            | Spanish mole                           | BK063986     |
| <i>Uropsilus gracilis</i> | Gracile shrew mole                   | BK063987                               |              |
| Tubulidentata             | <i>Orycteropus afer</i>              | Aardvark                               | AY133058     |

The species have been classified by their respective orders and are then arranged alphabetically based on their binomial nomenclature. The list includes common names and the corresponding Genbank accession numbers for their PrP sequences, each of which is linked to Genbank for further reference. Newly introduced accession numbers for this particular study are highlighted in green. Species sharing the same PrP sequence as the reference species are highlighted in blue for easy identification.

**Supplementary table 2. Comprehensive data for 382 analyzed species: Misfolding scores, structural and biochemical insights, and sequencing details (linked to PrPdex database)**

| BINOMIAL NAME                           | COMMON NAME                         | ORDER        | AA No. <sup>a</sup> | Conf No. <sup>b</sup> | Stability <sup>c</sup> | Score <sup>d</sup> | PDB <sup>e</sup> | PrPdex <sup>f</sup> |
|-----------------------------------------|-------------------------------------|--------------|---------------------|-----------------------|------------------------|--------------------|------------------|---------------------|
| <i>Arvicanthis niloticus</i>            | African grass rat                   | Rodentia     | 5                   | 2                     | -5.57                  | 100                | 2544             | 2544                |
| <i>Bandicota indica</i>                 | Greater bandicoot rat               | Rodentia     | 4                   | 1                     | -9.35                  | 100                | 1340             | 1340                |
| <i>Cervus elaphus canadensis</i>        | Elk                                 | Artiodactyla | 10                  | 2                     | -11.73                 | 100                | 1178             | 1178                |
| <i>Dama dama</i>                        | Fallow deer                         | Artiodactyla | 11                  | 3                     | -10.8                  | 100                | 0980             | 0980                |
| <i>Dipodomys stephensi</i>              | Stephens' kangaroo rat              | Rodentia     | 11                  | 4                     | ND                     | 100                | 3240             | 3240                |
| <i>Ellobius lutescens</i>               | Transcaucasian mole vole            | Rodentia     | 1                   | 1                     | 6.65                   | 100                | 3175             | 3175                |
| <i>Ellobius talpinus</i>                | Northern mole vole                  | Rodentia     | 1                   | 1                     | 3.73                   | 100                | 3206             | 3206                |
| <i>Lycaon pictus</i>                    | African wild dog                    | Carnivora    | 11                  | 1                     | -6.06                  | 100                | 3183             | 3183                |
| <i>Maxomys surifer</i>                  | Red spiny rat                       | Rodentia     | 3                   | 1                     | -0.97                  | 100                | 1440             | 1440                |
| <i>Mellivora capensis</i>               | Honey badger                        | Carnivora    | 12                  | 3                     | -6.43                  | 100                | 3170             | 3170                |
| <i>Meriones unguiculatus</i>            | Mongolian gerbil                    | Rodentia     | 3                   | 1                     | -3.71                  | 100                | 1111             | 1111                |
| <i>Microtus agrestis</i>                | Field vole                          | Rodentia     | 1                   | 1                     | -1.99                  | 100                | 1423             | 1423                |
| <i>Microtus arvalis</i>                 | Common vole                         | Rodentia     | 1                   | 1                     | 2.34                   | 100                | 3268             | 3268                |
| <i>Microtus ochrogaster</i>             | Prairie vole                        | Rodentia     | 2                   | 1                     | -13.33                 | 100                | 1094             | 1094                |
| <i>Microtus oeconomus</i>               | Tundra vole                         | Rodentia     | 1                   | 1                     | -3.36                  | 100                | 3270             | 3270                |
| <i>Mustela putorius</i>                 | Ferret                              | Carnivora    | 10                  | 2                     | -8.29                  | 100                | 1072             | 1072                |
| <i>Myodes gapperi</i>                   | Southern red-backed vole            | Rodentia     | 2                   | 2                     | 4.84                   | 100                | 1390             | 1390                |
| <i>Myodes glareolus</i>                 | Bank vole                           | Rodentia     | 0                   | 4                     | 0                      | 100                | 0092             | 0092                |
| <i>Neotragus pygmaeus</i>               | Royal antelope                      | Artiodactyla | 10                  | 3                     | -11.29                 | 100                | 3292             | 3292                |
| <i>Odocoileus hemionus</i>              | Mule deer                           | Artiodactyla | 9                   | 2                     | -21.62                 | 100                | 0174             | 0174                |
| <i>Pedetes capensis</i>                 | South African springhare            | Rodentia     | 8                   | 1                     | ND                     | 100                | 3186             | 3186                |
| <i>Petaurista alborufus</i>             | Red and white giant flying squirrel | Rodentia     | 11                  | 1                     | -12.03                 | 100                | 1454             | 1454                |
| <i>Phodopus sungorus</i>                | Russian hamster                     | Rodentia     | 3                   | 1                     | -1.18                  | 100                | 0822             | 0822                |
| <i>Rattus norvegicus</i>                | Brown rat                           | Rodentia     | 4                   | 1                     | -6.76                  | 100                | 0825             | 0825                |
| <i>Rousettus aegyptiacus</i>            | Egyptian fruit bat                  | Chiroptera   | 11                  | 1                     | -20.62                 | 100                | 1107             | 1107                |
| <i>Saxatilomys paulinae</i>             | Paulina's limestone rat             | Rodentia     | 4                   | 1                     | -10.57                 | 100                | 1449             | 1449                |
| <i>Tragulus javanicus</i>               | Java mouse-deer                     | Artiodactyla | 8                   | 1                     | -12.57                 | 100                | 3165             | 3165                |
| <i>Microtus pennsylvanicus</i>          | Meadow vole                         | Rodentia     | 1                   | 1                     | -3.72                  | 96,4               | 1422             | 1422                |
| <i>Muntiacus reevesi</i>                | Reeves's muntjac                    | Artiodactyla | 9                   | 1                     | -13.83                 | 96,4               | 0950             | 0950                |
| <i>Pteropus alecto</i>                  | Black flying fox                    | Chiroptera   | 11                  | 1                     | -6.57                  | 96,4               | 1101             | 1101                |
| <i>Microtus fortis</i>                  | Reed vole                           | Rodentia     | 2                   | 3                     | -3.21                  | 94,3               | 3269             | 3269                |
| <i>Mustela erminea</i>                  | Stoat                               | Carnivora    | 11                  | 4                     | -8.8                   | 94,3               | 0549             | 0549                |
| <i>Cricetulus migratorius</i>           | Armenian hamster                    | Rodentia     | 4                   | 1                     | -7.18                  | 92,9               | 0824             | 0824                |
| <i>Dipodomys merriami</i>               | Merriam's kangaroo rat              | Rodentia     | 11                  | 1                     | 1.98                   | 92,9               | 4560             | 4560                |
| <i>Neotoma lepida</i>                   | Desert woodrat                      | Rodentia     | 3                   | 2                     | -3.66                  | 92,9               | 3290             | 3290                |
| <i>Acomys cahirinus</i>                 | Cairo spiny mouse                   | Rodentia     | 3                   | 1                     | -2.04                  | 91,1               | 1370             | 1370                |
| <i>Peromyscus californicus insignis</i> | California mouse                    | Rodentia     | 3                   | 1                     | -8.01                  | 91,1               | 3303             | 3303                |
| <i>Phodopus campbelli</i>               | Campbell's dwarf hamster            | Rodentia     | 2                   | 1                     | -0.53                  | 91,1               | 1433             | 1433                |
| <i>Tragelaphus angasii</i>              | Lowland nyala                       | Artiodactyla | 11                  | 3                     | -10.1                  | 90,7               | 1327             | 1327                |
| <i>Elaphurus davidianus</i>             | Père David's deer                   | Artiodactyla | 10                  | 1                     | -9.46                  | 89,3               | 1450             | 1450                |
| <i>Raphicerus campestris</i>            | Steenbok                            | Artiodactyla | 10                  | 4                     | -11.02                 | 89,3               | 3318             | 3318                |
| <i>Tupaia tana</i>                      | Large treeshrew                     | Scandentia   | 12                  | 2                     | ND                     | 89,3               | 1371             | 1371                |
| <i>Cynopterus sphinx</i>                | Indian short-nosed fruit bat        | Chiroptera   | 9                   | 2                     | -7.08                  | 87,5               | 1156             | 1156                |
| <i>Rhizomys pruinosus</i>               | Hoary bamboo rat                    | Rodentia     | 12                  | 2                     | -9.79                  | 87,5               | 3159             | 3159                |
| <i>Suricata suricatta</i>               | Meerkat                             | Carnivora    | 11                  | 2                     | -9.09                  | 87,5               | 0939             | 0939                |
| <i>Okapia johnstoni</i>                 | Okapi                               | Artiodactyla | 11                  | 2                     | -12.63                 | 87,1               | 3197             | 3197                |
| <i>Boselaphus tragocamelus</i>          | Nilgai                              | Artiodactyla | 12                  | 1                     | -7.53                  | 85,7               | 1357             | 1357                |
| <i>Cricetulus barabensis</i>            | Chinese hamster                     | Rodentia     | 2                   | 2                     | -4.97                  | 85,7               | 0835             | 0835                |
| <i>Hippotragus niger niger</i>          | Sable antelope                      | Artiodactyla | 10                  | 2                     | -11.98                 | 85,7               | 3225             | 3225                |

| BINOMIAL NAME                     | COMMON NAME                  | ORDER        | AA No. <sup>a</sup> | Conf No. <sup>b</sup> | Stability <sup>c</sup> | Score <sup>d</sup> | PDB <sup>e</sup> | PrPdex <sup>f</sup> |
|-----------------------------------|------------------------------|--------------|---------------------|-----------------------|------------------------|--------------------|------------------|---------------------|
| <i>Lynx rufus</i>                 | Bobcat                       | Carnivora    | 12                  | 4                     | -6.74                  | 83,9               | 1333             | 1333                |
| <i>Canis lupus familiaris</i>     | Dog                          | Carnivora    | 11                  | 2                     | -2.04                  | 83,6               | 0139             | 0139                |
| <i>Grammomys surdaster</i>        | African woodland thicket rat | Rodentia     | 4                   | 2                     | -3.65                  | 83                 | 1001             | 1001                |
| <i>Eidolon helvum</i>             | Straw-coloured fruit bat     | Chiroptera   | 10                  | 1                     | -16.93                 | 82,1               | 3205             | 3205                |
| <i>Hipposideros armiger</i>       | Great roundleaf bat          | Chiroptera   | 7                   | 2                     | -2.36                  | 82,1               | 1109             | 1109                |
| <i>Macroglossus sobrinus</i>      | Long-tongued fruit bat       | Chiroptera   | 9                   | 1                     | -14.88                 | 82,1               | 3149             | 3149                |
| <i>Peromyscus leucopus</i>        | White-footed mouse           | Rodentia     | 2                   | 2                     | -1.47                  | 82,1               | 1011             | 1011                |
| <i>Dipodomys ordii</i>            | Ord's kangaroo rat           | Rodentia     | 9                   | 3                     | 2.83                   | 81,8               | 2568             | 2568                |
| <i>Mus musculus</i>               | Mouse                        | Rodentia     | 3                   | 2                     | -3.3                   | 79,6               | 0113             | 0113                |
| <i>Glaucomys volans</i>           | Southern flying squirrel     | Rodentia     | 11                  | 3                     | -8.59                  | 78,9               | 4022             | 4022                |
| <i>Allactaga bullata</i>          | Gobi jerboa                  | Rodentia     | 13                  | 3                     | -10.12                 | 78,6               | 3330             | 3330                |
| <i>Panthera leo</i>               | Lion                         | Carnivora    | 12                  | 5                     | -6.42                  | 78,6               | 1085             | 1085                |
| <i>Castor canadensis</i>          | North American beaver        | Rodentia     | 9                   | 4                     | ND                     | 78,2               | 0940             | 0940                |
| <i>Spalax galili</i>              | Upper Galilee M.             | Rodentia     | 7                   | 2                     | -10.9                  | 78,2               | 1088             | 1088                |
| <i>Tragelaphus speki</i>          | Sitatunga                    | Artiodactyla | 11                  | 4                     | -10.2                  | 76,8               | 1381             | 1381                |
| <i>Oryx gazella</i>               | Gemsbok                      | Artiodactyla | 9                   | 2                     | -11.01                 | 76,1               | 3297             | 3297                |
| <i>Psammomys obesus</i>           | Fat sand rat                 | Rodentia     | 3                   | 2                     | 1.23                   | 75                 | 3096             | 3096                |
| <i>Sigmodon fulviventer</i>       | Tawny-bellied cotton rat     | Rodentia     | 2                   | 1                     | -0.82                  | 75                 | 1349             | 1349                |
| <i>Syncerus caffer</i>            | African buffalo              | Artiodactyla | 10                  | 1                     | -10.06                 | 75                 | 1434             | 1434                |
| <i>Mastomys coucha</i>            | Southern multimammate mouse  | Rodentia     | 3                   | 1                     | -6.17                  | 74,6               | 1098             | 1098                |
| <i>Callicebus donacophilus</i>    | White-eared titi             | Primates     | 8                   | 4                     | 4.73                   | 74,1               | 3329             | 3329                |
| <i>Kobus megaceros</i>            | Nile lechwe                  | Artiodactyla | 11                  | 2                     | -13.74                 | 71,8               | 1448             | 1448                |
| <i>Muntiacus muntjak</i>          | Indian muntjac               | Artiodactyla | 10                  | 1                     | -14.89                 | 71,8               | 3277             | 3277                |
| <i>Tupaia belangeri chinensis</i> | Chinese tree shrew           | Scandentia   | 12                  | 1                     | ND                     | 71,8               | 1093             | 1093                |
| <i>Neovison vison</i>             | American mink                | Carnivora    | 11                  | 1                     | -6.64                  | 71,4               | 0180             | 0180                |
| <i>Octodon degus</i>              | Common degu                  | Rodentia     | 11                  | 2                     | ND                     | 71,4               | 1003             | 1003                |
| <i>Philantomba maxwellii</i>      | Maxwell's duiker             | Artiodactyla | 9                   | 2                     | -11.79                 | 71,4               | 3307             | 3307                |
| <i>Taurotragus oryx</i>           | Common eland                 | Artiodactyla | 11                  | 3                     | -24.41                 | 71,4               | 1379             | 1379                |
| <i>Thomomys bottae</i>            | Botta's pocket gopher        | Rodentia     | 12                  | 1                     | ND                     | 71,4               | 4580             | 4580                |
| <i>Uromys caudimaculatus</i>      | Giant white-tailed rat       | Rodentia     | 4                   | 1                     | -9.36                  | 71,4               | 3974             | 3974                |
| <i>Aplodontia rufa</i>            | Mountain beaver              | Rodentia     | 12                  | 1                     | -11.28                 | 71,1               | 3247             | 3247                |
| <i>Ctenodactylus gundi</i>        | Common gundi                 | Rodentia     | 12                  | 2                     | -6.5                   | 71,1               | 3076             | 3076                |
| <i>Thryonomys swinderianus</i>    | Greater cane rat             | Rodentia     | 9                   | 3                     | ND                     | 70,4               | 3776             | 3776                |
| <i>Eospalax fontanierii</i>       | Chinese zokor                | Rodentia     | 8                   | 4                     | -3.33                  | 69,3               | 4002             | 4002                |
| <i>Ailurus fulgens</i>            | Red panda                    | Carnivora    | 13                  | 2                     | -12.32                 | 67,9               | 0948             | 0948                |
| <i>Sus scrofa</i>                 | Pig                          | Artiodactyla | 12                  | 3                     | -15.4                  | 67,9               | 0243             | 0243                |
| <i>Theropithecus gelada</i>       | Gelada                       | Primates     | 8                   | 4                     | -8.22                  | 67,9               | 1204             | 1204                |
| <i>Vulpes vulpes</i>              | Red fox                      | Carnivora    | 11                  | 2                     | -8.8                   | 67,9               | 1114             | 1114                |
| <i>Aepyceros melampus</i>         | Impala                       | Artiodactyla | 10                  | 2                     | -14.79                 | 67,5               | 3047             | 3047                |
| <i>Callithrix jacchus</i>         | Common marmoset              | Primates     | 7                   | 1                     | -4.16                  | 67,5               | 1121             | 1121                |
| <i>Rhynchomys soricoides</i>      | Mount Data shrew-rat         | Rodentia     | 5                   | 1                     | -6.81                  | 67,5               | 3799             | 3799                |
| <i>Leptonychotes weddellii</i>    | Weddell seal                 | Carnivora    | 14                  | 4                     | -6.26                  | 66,1               | 1081             | 1081                |
| <i>Moschus moschiferus</i>        | Siberian musk deer           | Artiodactyla | 11                  | 2                     | -11.5                  | 65                 | 2032             | 2032                |
| <i>Callicebus moloch</i>          | Red-bellied titi             | Primates     | 7                   | 6                     | 3.98                   | 64,3               | 1429             | 1429                |
| <i>Canis latrans</i>              | Coyote                       | Carnivora    | 11                  | 2                     | -5.73                  | 64,3               | 1353             | 1353                |
| <i>Catopuma temminckii</i>        | Asian golden cat             | Carnivora    | 12                  | 4                     | -12.45                 | 64,3               | 1408             | 1408                |
| <i>Glis glis</i>                  | Edible dormouse              | Rodentia     | 12                  | 4                     | -2.93                  | 64,3               | 3217             | 3217                |
| <i>Alouatta belzebul</i>          | Red-handed howler            | Primates     | 8                   | 4                     | -0.92                  | 63,6               | 1383             | 1383                |
| <i>Antilope cervicapra</i>        | Blackbuck                    | Artiodactyla | 9                   | 1                     | -12.66                 | 62,5               | 1350             | 1350                |
| <i>Meriones libycus</i>           | Libyan jird                  | Rodentia     | 4                   | 2                     | -15,45                 | 62,5               | 4640             | 4640                |
| <i>Mirounga leonina</i>           | Southern elephant seal       | Carnivora    | 14                  | 3                     | -12.06                 | 62,5               | 2188             | 2188                |
| <i>Neodon shergylaensis</i>       | Shergylaensis vole           | Rodentia     | 2                   | 1                     | -15,47                 | 62,5               | 4584             | 4584                |
| <i>Ovis canadensis</i>            | Bighorn sheep                | Artiodactyla | 11                  | 1                     | -9.13                  | 62,5               | 1478             | 1478                |

| BINOMIAL NAME                       | COMMON NAME                  | ORDER          | AA No. <sup>a</sup> | Conf No. <sup>b</sup> | Stability <sup>c</sup> | Score <sup>d</sup> | PDB <sup>e</sup> | PrPdex <sup>f</sup> |
|-------------------------------------|------------------------------|----------------|---------------------|-----------------------|------------------------|--------------------|------------------|---------------------|
| <i>Gymnobelideus leadbeateri</i>    | Leadbeater's possum          | Diprotodontia  | 19                  | 3                     | ND                     | 60,2               | 3252             | 3252                |
| <i>Proteles cristata</i>            | Aardwolf                     | Carnivora      | 14                  | 3                     | -10.08                 | 59,3               | 3169             | 3169                |
| <i>Ovis aries</i>                   | Sheep                        | Artiodactyla   | 10                  | 2                     | -11.89                 | 54,3               | 0195             | 0195                |
| <i>Saguinus imperator</i>           | Emperor tamarin              | Primates       | 6                   | 2                     | 4.37                   | 53,6               | 3200             | 3200                |
| <i>Tremarctos ornatus</i>           | Spectacled bear              | Carnivora      | 13                  | 1                     | -10.4                  | 53,6               | 3583             | 3583                |
| <i>Xerus rutilus</i>                | Unstriped ground squirrel    | Rodentia       | 12                  | 2                     | -13.01                 | 53,6               | 3962             | 3962                |
| <i>Cavia tschudii</i>               | Montane guinea pig           | Rodentia       | 12                  | 4                     | ND                     | 53,2               | 3061             | 3061                |
| <i>Miniopterus natalensis</i>       | Natal long-fingered bat      | Chiroptera     | 16                  | 4                     | ND                     | 50,7               | 1125             | 1125                |
| <i>Phacochoerus africanus</i>       | Common warthog               | Artiodactyla   | 13                  | 2                     | -13.67                 | 48,6               | 3101             | 3101                |
| <i>Petromus typicus</i>             | Dassie rat                   | Rodentia       | 11                  | 1                     | ND                     | 48,2               | 3148             | 3148                |
| <i>Rousettus madagascariensis</i>   | Madagascan rousette          | Chiroptera     | 11                  | 1                     | -18.77                 | 48,2               | 3973             | 3973                |
| <i>Sciurus stramineus</i>           | Guayaquil squirrel           | Rodentia       | 11                  | 3                     | -7.89                  | 48,2               | 1091             | 1091                |
| <i>Indri indri</i>                  | Indri                        | Primates       | 11                  | 4                     | -10.04                 | 47,9               | 3227             | 3227                |
| <i>Pseudocheirus peregrinus o.</i>  | Western ringtail             | Diprotodontia  | 17                  | 3                     | ND                     | 46,4               | 3959             | 3959                |
| <i>Typhlomys cinereus</i>           | Chinese pygmy dormouse       | Rodentia       | 8                   | 1                     | -13.72                 | 46,4               | 4478             | 4478                |
| <i>Aotus trivirgatus</i>            | Three-striped night monkey   | Primates       | 9                   | 3                     | -5.4                   | 46,1               | 1385             | 1385                |
| <i>Bos grunniens</i>                | Domestic yak                 | Artiodactyla   | 13                  | 4                     | -4.17                  | 45,2               | 1748             | 1748                |
| <i>Kobus ellipsiprymnus</i>         | Waterbuck                    | Artiodactyla   | 11                  | 1                     | -12.69                 | 44,6               | 1351             | 1351                |
| <i>Sciurus carolinensis</i>         | Eastern gray squirrel        | Rodentia       | 12                  | 1                     | -14.31                 | 44,6               | 3708             | 3708                |
| <i>Suncus etruscus</i>              | Etruscan shrew               | Soricomorpha   | 14                  | 2                     | -3.98                  | 44,6               | 4534             | 4534                |
| <i>Tragelaphus imberbis</i>         | Lesser kudu                  | Artiodactyla   | 10                  | 2                     | -12.32                 | 44,6               | 1380             | 1380                |
| <i>Ursus arctos</i>                 | Brown bear                   | Carnivora      | 13                  | 1                     | -10.67                 | 44,6               | 0927             | 0927                |
| <i>Microtus oregoni</i>             | Creeping vole                | Rodentia       | 2                   | 1                     | -4.39                  | 42,9               | 3388             | 3388                |
| <i>Rhabdomys dilectus</i>           | Mesic four-striped grass rat | Rodentia       | 5                   | 2                     | -4.89                  | 40,4               | 3800             | 3800                |
| <i>Catagonus wagneri</i>            | Chacoan peccary              | Artiodactyla   | 13                  | 6                     | -17.92                 | 40                 | 2022             | 2022                |
| <i>Hylomyscus alleni</i>            | Allen's wood mouse           | Rodentia       | 5                   | 1                     | -10.63                 | 40                 | 3803             | 3803                |
| <i>Dipodomys spectabilis</i>        | Banner-tailed kangaroo rat   | Rodentia       | 12                  | 4                     | -8.72                  | 39,8               | 3688             | 3688                |
| <i>Herpestes javanicus</i>          | Javan mongoose               | Carnivora      | 11                  | 3                     | -6.95                  | 39,6               | 1345             | 1345                |
| <i>Moschus chrysogaster</i>         | Alpine musk deer             | Artiodactyla   | 10                  | 2                     | -12.34                 | 39,3               | 0920             | 0920                |
| <i>Manis javanica</i>               | Pangolin                     | Pholidota      | 8                   | 5                     | ND                     | 38,6               | 0942             | 0942                |
| <i>Tragelaphus scriptus</i>         | Harnessed bushbuck           | Artiodactyla   | 11                  | 2                     | -15.56                 | 36,8               | 3060             | 3060                |
| <i>Lophiomys imhausi</i>            | Maned rat                    | Rodentia       | 4                   | 1                     | -2.47                  | 36,6               | 3608             | 3608                |
| <i>Tamandua tetradactyla</i>        | Southern tamandua            | Pilosa         | 15                  | 2                     | -10.89                 | 36,6               | 3137             | 3137                |
| <i>Hylomys suillus</i>              | Short-tailed gymnure         | Erinaceomorpha | 12                  | 2                     | -10.37                 | 36,1               | 1344             | 1344                |
| <i>Hipposideros galeritus</i>       | Cantor's roundleaf bat       | Chiroptera     | 6                   | 1                     | -8.51                  | 35,9               | 3223             | 3223                |
| <i>Arctictis binturong</i>          | Binturong                    | Carnivora      | 11                  | 1                     | -5.22                  | 35,7               | 0925             | 0925                |
| <i>Mandrillus leucophaeus</i>       | Drill                        | Primates       | 10                  | 3                     | -10.7                  | 35,7               | 2078             | 2078                |
| <i>Octomys mimax</i>                | Mountain viscacha rat        | Rodentia       | 11                  | 1                     | ND                     | 33,9               | 3172             | 3172                |
| <i>Potos flavus</i>                 | Kinkajou                     | Carnivora      | 12                  | 3                     | -6.27                  | 33,9               | 3094             | 3094                |
| <i>Propithecus coquereli</i>        | Coquerel's sifaka            | Primates       | 11                  | 2                     | -3.69                  | 33,9               | 1127             | 1127                |
| <i>Tragelaphus strepsiceros</i>     | Greater kudu                 | Artiodactyla   | 12                  | 1                     | -14.67                 | 33,9               | 1482             | 1482                |
| <i>Trichosurus vulpecula</i>        | Common brushtail possum      | Diprotodontia  | 18                  | 3                     | ND                     | 33,9               | 1335             | 1335                |
| <i>Babyrousa celebensis</i>         | North Sulawesi babirusa      | Artiodactyla   | 12                  | 1                     | -12.04                 | 33                 | 3940             | 3940                |
| <i>Daubentonia madagascariensis</i> | Aye-aye                      | Primates       | 11                  | 3                     | ND                     | 33                 | 3173             | 3173                |
| <i>Arctocephalus gazella</i>        | Antarctic fur seal           | Carnivora      | 11                  | 2                     | -11.5                  | 32,5               | 3248             | 3248                |
| <i>Peromyscus polionotus s.</i>     | Oldfield mouse               | Rodentia       | 1                   | 2                     | 1.23                   | 32,5               | 0941             | 0941                |
| <i>Apodemus fulvipectus</i>         | Steppe field mouse           | Rodentia       | 5                   | 1                     | -11.57                 | 30,4               | 1395             | 1395                |
| <i>Homo sapiens</i>                 | Human                        | Primates       | 12                  | 2                     | -11.6                  | 30,4               | 0178             | 0178                |
| <i>Lagothrix lagotricha</i>         | Brown woolly monkey          | Primates       | 10                  | 4                     | -7.89                  | 30                 | 1389             | 1389                |
| <i>Gulo gulo</i>                    | Wolverine                    | Carnivora      | 12                  | 3                     | -4.08                  | 29,8               | 0123             | 0123                |
| <i>Ctenomys sociabilis</i>          | Social tuco-tuco             | Rodentia       | 14                  | 2                     | ND                     | 28,6               | 3078             | 3078                |
| <i>Phalanger gymnotis</i>           | Ground cuscus                | Diprotodontia  | 16                  | 5                     | ND                     | 28,6               | 3956             | 3956                |
| <i>Mirza coquereli</i>              | Coquerel's giant mouse lemur | Primates       | 6                   | 3                     | 4.23                   | 27,9               | 3273             | 3273                |

| BINOMIAL NAME                     | COMMON NAME                  | ORDER           | AA No. <sup>a</sup> | Conf No. <sup>b</sup> | Stability <sup>c</sup> | Score <sup>d</sup> | PDB <sup>e</sup> | PrPdex <sup>f</sup> |
|-----------------------------------|------------------------------|-----------------|---------------------|-----------------------|------------------------|--------------------|------------------|---------------------|
| <i>Arvicola amphibius</i>         | European water vole          | Rodentia        | 1                   | 1                     | -0.51                  | 27,7               | 3080             | 3080                |
| <i>Dinomys branickii</i>          | Pacarana                     | Rodentia        | 12                  | 1                     | ND                     | 26,8               | 3082             | 3082                |
| <i>Jaculus jaculus</i>            | Lesser Egyptian jerboa       | Rodentia        | 13                  | 2                     | -14.88                 | 26,8               | 0936             | 0936                |
| <i>Macaca nemestrina</i>          | Pigtail macaque              | Primates        | 9                   | 1                     | -6.33                  | 26,8               | 1970             | 1970                |
| <i>Peromyscus attwateri</i>       | Texas mouse                  | Rodentia        | 2                   | 1                     | 1.56                   | 26,8               | 3188             | 3188                |
| <i>Macroscelides proboscideus</i> | Round-eared elephant shrew   | Macroscelidea   | 15                  | 4                     | -9.98                  | 26,4               | 1343             | 1343                |
| <i>Atelerix albiventris</i>       | Four-toed hedgehog           | Erinaceomorpha  | 16                  | 2                     | ND                     | 25,4               | 4029             | 4029                |
| <i>Sylvicapra grimmia</i>         | Common duiker                | Artiodactyla    | 10                  | 3                     | -12.74                 | 25                 | 3204             | 3204                |
| <i>Monachus schauinslandi</i>     | Hawaiian monk seal           | Carnivora       | 14                  | 2                     | -10.71                 | 24,6               | 1112             | 1112                |
| <i>Mungos mungo</i>               | Banded mongoose              | Carnivora       | 13                  | 2                     | -9.1                   | 23,6               | 3278             | 3278                |
| <i>Canis mesomelas</i>            | Black-backed jackal          | Carnivora       | 12                  | 2                     | -8.24                  | 23                 | 3927             | 3927                |
| <i>Gracilinanus agilis</i>        | Agile gracile opossum        | Didelphimorphia | 17                  | 3                     | ND                     | 22,9               | 3086             | 3086                |
| <i>Talpa occidentalis</i>         | Spanish mole                 | Soricomorpha    | 11                  | 4                     | -3.35                  | 22,9               | 3143             | 3143                |
| <i>Budorcas taxicolor</i>         | Takin                        | Artiodactyla    | 11                  | 1                     | -12.4                  | 22,3               | 1348             | 1348                |
| <i>Manis pentadactyla</i>         | Chinese pangolin             | Pholidota       | 8                   | 4                     | ND                     | 22,1               | 3092             | 3092                |
| <i>Ateles geoffroyi</i>           | Geoffroy's spider monkey     | Primates        | 8                   | 1                     | -6.77                  | 21,4               | 1417             | 1417                |
| <i>Eonycteris spelaea</i>         | Cave nectar bat              | Chiroptera      | 11                  | 1                     | -13.08                 | 21,4               | 3207             | 3207                |
| <i>Molossus molossus</i>          | Velvety free-tailed bat      | Chiroptera      | 14                  | 2                     | -7.17                  | 21,1               | 2386             | 2386                |
| <i>Pan troglodytes</i>            | Chimpanzee                   | Primates        | 12                  | 2                     | -9.88                  | 20,7               | 1134             | 1134                |
| <i>Antilocapra americana</i>      | Pronghorn                    | Artiodactyla    | 10                  | 1                     | -12.73                 | 19,6               | 0945             | 0945                |
| <i>Sminthopsis crassicaudata</i>  | Fat-tailed dunnart           | Dasyuromorphia  | 21                  | 3                     | ND                     | 19,6               | 3850             | 3850                |
| <i>Rousettus leschenaultii</i>    | Leschenault's rousette       | Chiroptera      | 12                  | 2                     | -20.82                 | 19,3               | 3157             | 3157                |
| <i>Chinchilla lanigera</i>        | Long-tailed chinchilla       | Rodentia        | 13                  | 1                     | ND                     | 18,8               | 1136             | 1136                |
| <i>Saguinus bicolor</i>           | Pied tamarin                 | Primates        | 7                   | 2                     | 6.16                   | 18,8               | 1456             | 1456                |
| <i>Talpa europaea</i>             | European mole                | Soricomorpha    | 12                  | 1                     | -2.87                  | 18,8               | 0974             | 0974                |
| <i>Spilogale gracilis</i>         | Western spotted skunk        | Carnivora       | 12                  | 1                     | -1.74                  | 18,2               | 3161             | 3161                |
| <i>Ochotona princeps</i>          | American pika                | Lagomorpha      | 11                  | 1                     | -12.67                 | 17,9               | 1140             | 1140                |
| <i>Sciurus vulgaris</i>           | Red squirrel                 | Rodentia        | 12                  | 1                     | -15.13                 | 17,9               | 0949             | 0949                |
| <i>Sorex araneus</i>              | Common shrew                 | Soricomorpha    | 16                  | 1                     | -14.08                 | 17,9               | 0976             | 0976                |
| <i>Manis tricuspis</i>            | Tree pangolin                | Pholidota       | 8                   | 2                     | ND                     | 17                 | 3089             | 3089                |
| <i>Muscardinus avellanarius</i>   | Hazel dormouse               | Rodentia        | 11                  | 2                     | -5.66                  | 17                 | 3285             | 3285                |
| <i>Tarsius syrichta</i>           | Philippine tarsier           | Primates        | 8                   | 1                     | -9.49                  | 17                 | 0943             | 0943                |
| <i>Galemys pyrenaicus</i>         | Pyrenean desman              | Soricomorpha    | 10                  | 3                     | -9.42                  | 16,6               | 2562             | 2562                |
| <i>Bubalus bubalis</i>            | Water buffalo                | Artiodactyla    | 11                  | 3                     | -12.88                 | 16,1               | 1198             | 1198                |
| <i>Ondatra zibethicus</i>         | Muskrat                      | Rodentia        | 1                   | 1                     | 0.61                   | 16,1               | 3191             | 3191                |
| <i>Rattus argentiventer</i>       | Ricefield rat                | Rodentia        | 5                   | 1                     | -12,39                 | 16,1               | 1341             | 1341                |
| <i>Equus caballus przewalskii</i> | Przewalski's horse           | Perissodactyla  | 11                  | 1                     | -8.75                  | 14,3               | 0413             | 0413                |
| <i>Gorilla gorilla</i>            | Western gorilla              | Primates        | 11                  | 1                     | -5.87                  | 14,3               | 1148             | 1148                |
| <i>Tapirus indicus</i>            | Malayan tapir                | Perissodactyla  | 12                  | 1                     | -9.07                  | 14,3               | 3134             | 3134                |
| <i>Tapirus terrestris</i>         | South American tapir         | Perissodactyla  | 15                  | 2                     | -7.74                  | 14,3               | 3135             | 3135                |
| <i>Hoolock leuconedys</i>         | Eastern hoolock gibbon       | Primates        | 12                  | 3                     | -11.24                 | 13,9               | 4530             | 4530                |
| <i>Cryptomys damarensis</i>       | Damaraland mole-rat          | Rodentia        | 13                  | 2                     | ND                     | 13                 | 1130             | 1130                |
| <i>Felis silvestris catus</i>     | Cat                          | Carnivora       | 11                  | 2                     | -8.92                  | 12,9               | 0173             | 0173                |
| <i>Pseudocheirops corinnae</i>    | Plush-coated ringtail possum | Diprotodontia   | 19                  | 2                     | ND                     | 12,9               | 3960             | 3960                |
| <i>Bos taurus</i>                 | Cow                          | Artiodactyla    | 11                  | 2                     | -10.33                 | 12,5               | 0201             | 0201                |
| <i>Lagorchestes hirsutus</i>      | Rufous hare-wallaby          | Diprotodontia   | 19                  | 1                     | ND                     | 12,5               | 3934             | 3934                |
| <i>Litocranius walleri</i>        | Gerenuk                      | Artiodactyla    | 9                   | 2                     | -13.08                 | 12,5               | 3257             | 3257                |
| <i>Sylvilagus bachmani</i>        | Brush rabbit                 | Lagomorpha      | 14                  | 2                     | -15.86                 | 12,5               | 3131             | 3131                |
| <i>Vicugna vicugna</i>            | Vicuna                       | Artiodactyla    | 12                  | 2                     | -7.28                  | 12                 | 2088             | 2088                |
| <i>Pongo pygmaeus</i>             | Bornean orangutan            | Primates        | 9                   | 1                     | -10.55                 | 11,6               | 0926             | 0926                |
| <i>Graphiurus murinus</i>         | Woodland dormouse            | Rodentia        | 18                  | 1                     | -7.47                  | 11,4               | 3218             | 3218                |
| <i>Phoca vitulina</i>             | Common seal                  | Carnivora       | 12                  | 3                     | -9.87                  | 11,1               | 0929             | 0929                |
| <i>Cercartetus concinnus</i>      | Western pygmy possum         | Diprotodontia   | 15                  | 1                     | ND                     | 10,7               | 4104             | 4104                |

| BINOMIAL NAME                        | COMMON NAME                     | ORDER           | AA No. <sup>a</sup> | Conf No. <sup>b</sup> | Stability <sup>c</sup> | Score <sup>d</sup> | PDB <sup>e</sup> | PrPdex <sup>f</sup> |
|--------------------------------------|---------------------------------|-----------------|---------------------|-----------------------|------------------------|--------------------|------------------|---------------------|
| <i>Craseonycteris thonglongyai</i>   | Kitti's hog-nosed bat           | Chiroptera      | 8                   | 2                     | -6.77                  | 10,7               | 3066             | 3066                |
| <i>Cryptomys darlingi</i>            | Mashona mole-rat                | Rodentia        | 14                  | 3                     | ND                     | 10,7               | 4004             | 4004                |
| <i>Nycticebus coucang</i>            | Sunda slow loris                | Primates        | 11                  | 2                     | -1.87                  | 10,7               | 3294             | 3294                |
| <i>Dasyprocta punctata</i>           | Central American agouti         | Rodentia        | 11                  | 4                     | ND                     | 10,4               | 3158             | 3158                |
| <i>Bettongia penicillata ogilbyi</i> | Woylie                          | Diprotodontia   | 17                  | 1                     | ND                     | 9,8                | 3976             | 3976                |
| <i>Cryptoprocta ferax</i>            | Fossa                           | Carnivora       | 12                  | 1                     | -8.09                  | 9,8                | 3075             | 3075                |
| <i>Camelus bactrianus ferus</i>      | Bactrian camel                  | Artiodactyla    | 12                  | 1                     | -3.78                  | 8,9                | 0544             | 0544                |
| <i>Cercocebus atys</i>               | Sooty mangabey                  | Primates        | 10                  | 1                     | -9.39                  | 8,9                | 2057             | 2057                |
| <i>Dasyurus hallucatus</i>           | Northern quoll                  | Dasyuromorphia  | 23                  | 1                     | ND                     | 8,9                | 3849             | 3849                |
| <i>Hexaprotodon liberiensis</i>      | Pygmy hippopotamus              | Artiodactyla    | 12                  | 1                     | ND                     | 8,9                | 0946             | 0946                |
| <i>Mephitis mephitis</i>             | Skunk                           | Carnivora       | 13                  | 1                     | -4.03                  | 8,9                | 0538             | 0538                |
| <i>Myotis septentrionalis</i>        | Northern long-eared bat         | Chiroptera      | 15                  | 1                     | -10.06                 | 8,9                | 3970             | 3970                |
| <i>Solenodon paradoxus woodi</i>     | Hispaniolan solenodon           | Soricomorpha    | 16                  | 1                     | -8.12                  | 8,9                | 3141             | 3141                |
| <i>Trichechus manatus</i>            | West Indian manatee             | Sirenia         | 12                  | 1                     | ND                     | 8,9                | 0959             | 0959                |
| <i>Vombatus ursinus</i>              | Common wombat                   | Diprotodontia   | 16                  | 1                     | ND                     | 8,9                | 1100             | 1100                |
| <i>Colobus angolensis palliatus</i>  | Angola colobus                  | Primates        | 9                   | 2                     | -1.54                  | 8,4                | 1200             | 1200                |
| <i>Odobenus rosmarus</i>             | Walrus                          | Carnivora       | 11                  | 2                     | -12.13                 | 8                  | 0547             | 0547                |
| <i>Zapus hudsonius</i>               | Meadow jumping mouse            | Rodentia        | 13                  | 2                     | -9.25                  | 8                  | 3323             | 3323                |
| <i>Myotis brandtii</i>               | Brandt's bat                    | Chiroptera      | 16                  | 2                     | -12.24                 | 7,7                | 1102             | 1102                |
| <i>Miopithecus talapoin</i>          | Angolan talapoin                | Primates        | 10                  | 2                     | -10.99                 | 7,5                | 4508             | 4508                |
| <i>Equus caballus ferus</i>          | Horse                           | Perissodactyla  | 12                  | 1                     | -4.71                  | 7,1                | 0115             | 0115                |
| <i>Myotis davidii</i>                | David's myotis                  | Chiroptera      | 14                  | 1                     | -13.43                 | 7,1                | 1132             | 1132                |
| <i>Saguinus midas</i>                | Golden-handed tamarin           | Primates        | 7                   | 2                     | -4.49                  | 7,1                | 4093             | 4093                |
| <i>Tadarida brasiliensis</i>         | Mexican free-tailed bat         | Chiroptera      | 15                  | 1                     | ND                     | 7,1                | 3162             | 3162                |
| <i>Lepus europaeus</i>               | Brown hare                      | Lagomorpha      | 13                  | 1                     | -17.76                 | 5,9                | 0533             | 0533                |
| <i>Cricetomys gambianus</i>          | Gambian pouched rat             | Rodentia        | 8                   | 1                     | -4.31                  | 5,5                | 3067             | 3067                |
| <i>Pipistrellus kuhlii</i>           | Kuhl's pipistrelle              | Chiroptera      | 16                  | 1                     | -3.52                  | 5                  | 2535             | 2535                |
| <i>Loris tardigradus</i>             | Red slender loris               | Primates        | 10                  | 1                     | 10.2                   | 4,8                | 4527             | 4527                |
| <i>Cebus capucinus</i>               | Panamanian white-faced capuchin | Primates        | 9                   | 2                     | -2.68                  | 3,9                | 1084             | 1084                |
| <i>Connochaetes taurinus</i>         | Blue wildebeest                 | Artiodactyla    | 11                  | 1                     | -8.49                  | 3,6                | 1414             | 1414                |
| <i>Dromiciops gliroides</i>          | Colocolo opossum                | Microbiotheria  | 14                  | 1                     | ND                     | 3,6                | 3732             | 3732                |
| <i>Equus asinus</i>                  | Asinus                          | Perissodactyla  | 12                  | 1                     | -2.76                  | 3,6                | 1070             | 1070                |
| <i>Lasiurus cinereus</i>             | Hoary bat                       | Chiroptera      | 16                  | 1                     | -4.45                  | 3,6                | 3046             | 3046                |
| <i>Leopardus geoffroyi</i>           | Geoffroy's cat                  | Carnivora       | 11                  | 1                     | -7.1                   | 3,6                | 4011             | 4011                |
| <i>Monodelphis domestica</i>         | Opossum                         | Didelphimorphia | 17                  | 1                     | ND                     | 3,6                | 0398             | 0398                |
| <i>Petaurus breviceps</i>            | Sugar glider                    | Diprotodontia   | 17                  | 1                     | -22,28                 | 3,6                | 4816             | 4816                |
| <i>Procapra gutturosa</i>            | Mongolian gazelle               | Artiodactyla    | 14                  | 1                     | -9.58                  | 3,6                | 1143             | 1143                |
| <i>Thylacinus cynocephalus</i>       | Thylacine                       | Dasyuromorphia  | 18                  | 1                     | ND                     | 3,6                | 4339             | 4339                |
| <i>Tympanoctomys barrerae</i>        | Plains viscacha rat             | Rodentia        | 11                  | 1                     | ND                     | 3,6                | 3322             | 3322                |
| <i>Condylura cristata</i>            | Star-nosed mole                 | Soricomorpha    | 12                  | 2                     | -0.07                  | 3,2                | 1138             | 1138                |
| <i>Chrysochloris asiatica</i>        | Cape golden mole                | Afrosoricida    | 15                  | 1                     | ND                     | 2,9                | 1128             | 1128                |
| <i>Ceratotherium simum simum</i>     | Southern white rhinoceros       | Perissodactyla  | 13                  | 1                     | -11.01                 | 2                  | 0955             | 0955                |
| <i>Galeopterus variegatus</i>        | Sunda flying lemur              | Dermoptera      | 12                  | 1                     | -8.07                  | 1,8                | 0957             | 0957                |
| <i>Otolemur garnettii</i>            | Northern greater galago         | Primates        | 9                   | 1                     | -2.15                  | 1,8                | 1105             | 1105                |
| <i>Giraffa camelopardalis r.</i>     | Reticulated giraffe             | Artiodactyla    | 12                  | 1                     | -14.52                 | 1,6                | 0951             | 0951                |
| <i>Dasyurus viverrinus</i>           | Eastern quoll                   | Dasyuromorphia  | 22                  | 1                     | ND                     | 1,4                | 4008             | 4008                |
| <i>Macrotus californicus</i>         | California leaf-nosed bat       | Chiroptera      | 17                  | 3                     | ND                     | 1,4                | 1151             | 1151                |
| <i>Helogale parvula</i>              | Common dwarf mongoose           | Carnivora       | 12                  | 1                     | -11.52                 | 0,9                | 3220             | 3220                |
| <i>Hippopotamus amphibius</i>        | Hippopotamus                    | Artiodactyla    | 12                  | 1                     | ND                     | 0,9                | 1359             | 1359                |
| <i>Leontopithecus rosalia</i>        | Golden lion tamarin             | Primates        | 6                   | 1                     | -4.23                  | 0,9                | 1437             | 1437                |
| <i>Leopardus wiedii</i>              | Margay                          | Carnivora       | 12                  | 1                     | ND                     | 0,9                | 1443             | 1443                |
| <i>Mandrillus sphinx</i>             | Mandrill                        | Primates        | 9                   | 1                     | -6.05                  | 0,9                | 1208             | 1208                |
| <i>Oryctolagus cuniculus</i>         | Rabbit                          | Lagomorpha      | 12                  | 1                     | -13.56                 | 0,9                | 0135             | 0135                |

| BINOMIAL NAME                      | COMMON NAME                     | ORDER           | AA No. <sup>a</sup> | Conf No. <sup>b</sup> | Stability <sup>c</sup> | Score <sup>d</sup> | PDB <sup>e</sup> | PrPdex <sup>f</sup> |
|------------------------------------|---------------------------------|-----------------|---------------------|-----------------------|------------------------|--------------------|------------------|---------------------|
| <i>Perognathus longimembris p.</i> | Little pocket mouse             | Rodentia        | 14                  | 1                     | ND                     | 0,9                | 3187             | 3187                |
| <i>Peromyscus crinitus</i>         | Canyon mouse                    | Rodentia        | 3                   | 1                     | -1.39                  | 0,9                | 3975             | 3975                |
| <i>Prolemur simus</i>              | Greater bamboo lemur            | Primates        | 10                  | 1                     | -6.96                  | 0,9                | 2028             | 2028                |
| <i>Rhinolophus sinicus</i>         | Chinese rufous horseshoe bat    | Chiroptera      | 15                  | 1                     | -3.92                  | 0,9                | 3151             | 3151                |
| <i>Saimiri boliviensis</i>         | Black-capped squirrel monkey    | Primates        | 11                  | 1                     | -5.19                  | 0,9                | 1975             | 1975                |
| <i>Spermophilus dauricus</i>       | Daurian ground squirrel         | Rodentia        | 19                  | 1                     | ND                     | 0,9                | 2025             | 2025                |
| <i>Chiropotes satanas</i>          | Black bearded saki              | Primates        | 8                   | 1                     | -3.52                  | 0,7                | 1431             | 1431                |
| <i>Dasyus novemcinctus</i>         | Nine-banded armadillo           | Cingulata       | 16                  | 1                     | -20.08                 | 0,4                | 0968             | 0968                |
| <i>Desmodus rotundus</i>           | Common vampire bat              | Chiroptera      | 15                  | 1                     | ND                     | 0,4                | 1472             | 1472                |
| <i>Eptesicus fuscus</i>            | Big brown bat                   | Chiroptera      | 17                  | 1                     | -0.01                  | 0,4                | 1139             | 1139                |
| <i>Lynx pardinus</i>               | Iberian lynx                    | Carnivora       | 11                  | 1                     | -8.12                  | 0,4                | 0977             | 0977                |
| <i>Spermophilus beecheyi</i>       | California ground squirrel      | Rodentia        | 15                  | 1                     | -11.31                 | 0,4                | 4486             | 4486                |
| <i>Anoura caudifer</i>             | Tailed tailless bat             | Chiroptera      | 15                  | 0                     | ND                     | 0                  | 3243             | 3243                |
| <i>Antechinus flavipes</i>         | Yellow-footed antechinus        | Dasyuromorphia  | 18                  | 0                     | ND                     | 0                  | 3128             | 3128                |
| <i>Antechinus stuartii</i>         | Brown antechinus                | Dasyuromorphia  | 19                  | 0                     | ND                     | 0                  | 3048             | 3048                |
| <i>Antrozous pallidus</i>          | Pallid bat                      | Chiroptera      | 17                  | 0                     | -1.85                  | 0                  | 3246             | 3246                |
| <i>Aotus lemurinus</i>             | Gray-bellied night monkey       | Primates        | 9                   | 0                     | 1.07                   | 0                  | 1386             | 1386                |
| <i>Artibeus jamaicensis</i>        | Jamaican fruit bat              | Chiroptera      | 16                  | 0                     | ND                     | 0                  | 3249             | 3249                |
| <i>Ateles paniscus</i>             | Red-faced spider monkey         | Primates        | 9                   | 0                     | -5.68                  | 0                  | 1415             | 1415                |
| <i>Balaenoptera physalus</i>       | Whale                           | Cetacea         | 14                  | 0                     | -16.96                 | 0                  | 0960             | 0960                |
| <i>Brachyteles arachnoides</i>     | Southern muriqui                | Primates        | 7                   | 0                     | -4.43                  | 0                  | 1337             | 1337                |
| <i>Bradypus variegatus</i>         | Brown-throated sloth            | Pilosa          | 16                  | 0                     | -11.57                 | 0                  | 3057             | 3057                |
| <i>Bubalus depressicornis</i>      | Anoa                            | Artiodactyla    | 12                  | 0                     | -12.62                 | 0                  | 1363             | 1363                |
| <i>Cabassous unicinctus</i>        | Southern naked-tailed armadillo | Cingulata       | 22                  | 0                     | -14.75                 | 0                  | 4842             | 4842                |
| <i>Capromys pilorides</i>          | Desmarest's hutia               | Rodentia        | 11                  | 0                     | ND                     | 0                  | 3213             | 3213                |
| <i>Caracal caracal</i>             | Caracal                         | Carnivora       | 13                  | 0                     | -6.41                  | 0                  | 3054             | 3054                |
| <i>Carollia perspicillata</i>      | Seba's short-tailed bat         | Chiroptera      | 15                  | 0                     | ND                     | 0                  | 3058             | 3058                |
| <i>Cavia aperea</i>                | Brazilian guinea pig            | Rodentia        | 13                  | 0                     | ND                     | 0                  | 1470             | 1470                |
| <i>Cavia porcellus</i>             | Guinea pig                      | Rodentia        | 13                  | 0                     | -6.62                  | 0                  | 0815             | 0815                |
| <i>Chaetophractus vellerosus</i>   | Screaming hairy armadillo       | Cingulata       | 17                  | 0                     | -17.17                 | 0                  | 3238             | 3238                |
| <i>Cheirogaleus medius</i>         | Fat-tailed dwarf lemur          | Primates        | 7                   | 0                     | 10.05                  | 0                  | 3059             | 3059                |
| <i>Choloepus didactylus</i>        | Linnaeus's two-toed sloth       | Pilosa          | 18                  | 0                     | -14.14                 | 0                  | 3071             | 3071                |
| <i>Coendou prehensilis</i>         | Brazilian porcupine             | Rodentia        | 15                  | 0                     | ND                     | 0                  | 3785             | 3785                |
| <i>Corynorhinus townsendii</i>     | Townsend's big-eared bat        | Chiroptera      | 17                  | 0                     | -17.27                 | 0                  | 4684             | 4684                |
| <i>Crocidura russula</i>           | Greater white-toothed shrew     | Soricomorpha    | 13                  | 0                     | -18.73                 | 0                  | 4606             | 4606                |
| <i>Crocuta crocuta</i>             | Spotted hyena                   | Carnivora       | 15                  | 0                     | -9.33                  | 0                  | 0531             | 0531                |
| <i>Cyclopes didactylus</i>         | Silky anteater                  | Pilosa          | 16                  | 0                     | ND                     | 0                  | 0923             | 0923                |
| <i>Delphinapterus leucas</i>       | Beluga whale                    | Cetacea         | 12                  | 0                     | -17.39                 | 0                  | 0924             | 0924                |
| <i>Dendrolagus matschiei</i>       | Matschie's tree-kangaroo        | Diprotodontia   | 19                  | 0                     | -23.84                 | 0                  | 4627             | 4627                |
| <i>Didelphis virginiana</i>        | Virginia opossum                | Didelphimorphia | 18                  | 0                     | ND                     | 0                  | 3918             | 3918                |
| <i>Dolichotis patagonum</i>        | Patagonian mara                 | Rodentia        | 13                  | 0                     | ND                     | 0                  | 1087             | 1087                |
| <i>Dugong dugon</i>                | Dugong                          | Sirenia         | 12                  | 0                     | ND                     | 0                  | 3138             | 3138                |
| <i>Echinops telfairi</i>           | Lesser hedgehog tenrec          | Afrosoricida    | 20                  | 0                     | ND                     | 0                  | 1082             | 1082                |
| <i>Elephantulus edwardii</i>       | Cape elephant shrew             | Macroscelidea   | 15                  | 0                     | ND                     | 0                  | 0972             | 0972                |
| <i>Erethizon dorsata</i>           | North American porcupine        | Rodentia        | 17                  | 0                     | ND                     | 0                  | 3085             | 3085                |
| <i>Erignathus barbatus</i>         | Bearded seal                    | Carnivora       | 12                  | 0                     | -8.49                  | 0                  | 3919             | 3919                |
| <i>Erinaceus europaeus</i>         | European hedgehog               | Erinaceomorpha  | 16                  | 0                     | ND                     | 0,9                | 0931             | 0931                |
| <i>Galago moholi</i>               | Mohol bushbaby                  | Primates        | 10                  | 0                     | -7.11                  | 0                  | 4523             | 4523                |
| <i>Heterocephalus glaber</i>       | Naked mole-rat                  | Rodentia        | 12                  | 0                     | ND                     | 0                  | 0978             | 0978                |
| <i>Hydrochoerus hydrochaeris</i>   | Capybara                        | Rodentia        | 14                  | 0                     | ND                     | 0                  | 1435             | 1435                |
| <i>Hyperoodon ampullatus</i>       | Northern bottlenose whale       | Cetacea         | 15                  | 0                     | -20.25                 | 0                  | 4556             | 4556                |
| <i>Hystrix brachyura</i>           | Malayan porcupine               | Rodentia        | 13                  | 0                     | ND                     | 0                  | 3056             | 3056                |
| <i>la io</i>                       | Great evening bat               | Chiroptera      | 15                  | 0                     | -13.71                 | 0                  | 4617             | 4617                |



| BINOMIAL NAME                      | COMMON NAME                    | ORDER            | AA No. <sup>a</sup> | Conf No. <sup>b</sup> | Stability <sup>c</sup> | Score <sup>d</sup> | PDB <sup>e</sup> | PrPdex <sup>f</sup> |
|------------------------------------|--------------------------------|------------------|---------------------|-----------------------|------------------------|--------------------|------------------|---------------------|
| <i>Inia geoffrensis</i>            | Amazon river dolphin           | Cetacea          | 12                  | 0                     | -17.25                 | 0                  | 3228             | 3228                |
| <i>Lagenorhynchus obliquidens</i>  | Pacific white-sided dolphin    | Cetacea          | 13                  | 0                     | -30.33                 | 0                  | 1416             | 1416                |
| <i>Leopardus tigrinus</i>          | Oncilla                        | Carnivora        | 11                  | 0                     | -14.52                 | 0                  | 4815             | 4815                |
| <i>Lipotes vexillifer</i>          | Baiji                          | Cetacea          | 13                  | 0                     | -10.64                 | 0                  | 0922             | 0922                |
| <i>Loxodonta africana</i>          | Elephant                       | Proboscidea      | 16                  | 0                     | ND                     | 0                  | 0930             | 0930                |
| <i>Macropus eugenii</i>            | Wallaby                        | Diprotodontia    | 19                  | 0                     | ND                     | 0                  | 3333             | 3333                |
| <i>Macropus giganteus</i>          | Eastern grey kangaroo          | Diprotodontia    | 20                  | 0                     | ND                     | 0                  | 3938             | 3938                |
| <i>Macropus rufus</i>              | Red kangaroo                   | Diprotodontia    | 22                  | 0                     | ND                     | 0                  | 3775             | 3775                |
| <i>Marmota flaviventris</i>        | Yellow-bellied marmot          | Rodentia         | 16                  | 0                     | -10.36                 | 0                  | 1099             | 1099                |
| <i>Marmota marmota</i>             | Alpine marmot                  | Rodentia         | 17                  | 0                     | -8.03                  | 0                  | 2667             | 2667                |
| <i>Megaderma lyra</i>              | Greater false vampire bat      | Chiroptera       | 8                   | 0                     | ND                     | 0                  | 3258             | 3258                |
| <i>Mesocricetus auratus</i>        | Syrian hamster                 | Rodentia         | 6                   | 0                     | -0.58                  | 0                  | 0133             | 0133                |
| <i>Mesoplodon bidens</i>           | Sowerby's beaked whale         | Cetacea          | 13                  | 0                     | -15.45                 | 0                  | 3262             | 3262                |
| <i>Mesoplodon stejnegeri</i>       | Stejneger's beaked whale       | Cetacea          | 13                  | 0                     | -16.57                 | 0                  | 3937             | 3937                |
| <i>Microcebus murinus</i>          | Gray mouse lemur               | Primates         | 8                   | 0                     | 1.62                   | 0                  | 0933             | 0933                |
| <i>Microcebus ravelobensis</i>     | Golden-brown mouse lemur       | Primates         | 9                   | 0                     | -0.56                  | 0                  | 3265             | 3265                |
| <i>Microgale talazaci</i>          | Talazac's shrew tenrec         | Afrosoricida     | 24                  | 0                     | ND                     | 0                  | 3087             | 3087                |
| <i>Micronycteris hirsuta</i>       | Hairy big-eared bat            | Chiroptera       | 15                  | 0                     | ND                     | 0                  | 3267             | 3267                |
| <i>Miniopterus schreibersii</i>    | Common bent-wing bat           | Chiroptera       | 13                  | 0                     | ND                     | 0                  | 3271             | 3271                |
| <i>Mormoops blainvillei</i>        | Antillean ghost-faced bat      | Chiroptera       | 15                  | 0                     | -14.83                 | 0                  | 3049             | 3049                |
| <i>Murina aurata feae</i>          | Little tube-nosed bat          | Chiroptera       | 16                  | 0                     | -7.85                  | 0                  | 3279             | 3279                |
| <i>Myocastor coypus</i>            | Coypu                          | Rodentia         | 10                  | 0                     | ND                     | 0                  | 3171             | 3171                |
| <i>Myotis ricketti</i>             | Rickett's big-footed bat       | Chiroptera       | 15                  | 0                     | -12.32                 | 0                  | 3338             | 3338                |
| <i>Myotis yumanensis</i>           | Yuma myotis                    | Chiroptera       | 16                  | 0                     | -17.57                 | 0                  | 4819             | 4819                |
| <i>Myrmecobius fasciatus</i>       | Numbat                         | Dasyuromorphia   | 19                  | 0                     | ND                     | 0                  | 4079             | 4079                |
| <i>Myrmecophaga tridactyla</i>     | Giant anteater                 | Pilosa           | 16                  | 0                     | -15.61                 | 0                  | 3136             | 3136                |
| <i>Neophocaena phocaenoides a.</i> | Narrow-ridged finless porpoise | Cetacea          | 12                  | 0                     | -24.72                 | 0                  | 1126             | 1126                |
| <i>Noctilio leporinus</i>          | Greater bulldog bat            | Chiroptera       | 14                  | 0                     | ND                     | 0                  | 3293             | 3293                |
| <i>Notoryctes typhlops</i>         | Southern marsupial mole        | Notoryctemorphia | 18                  | 0                     | -15.2                  | 0                  | 4081             | 4081                |
| <i>Nycticebus pygmaeus</i>         | Pygmy slow loris               | Primates         | 14                  | 0                     | -6.58                  | 0                  | 4835             | 4835                |
| <i>Nycticeius humeralis</i>        | Evening bat                    | Chiroptera       | 16                  | 0                     | -7.38                  | 0                  | 3295             | 3295                |
| <i>Ornithorhynchus anatinus</i>    | Platypus                       | Monotremata      | 26                  | 0                     | ND                     | 0                  | 0944             | 0944                |
| <i>Orycteropus afer</i>            | Aardvark                       | Tubulidentata    | 15                  | 0                     | ND                     | 0                  | 4930             | 4930                |
| <i>Petrogale xanthopus</i>         | Yellow-footed rock-wallaby     | Diprotodontia    | 20                  | 0                     | ND                     | 0                  | 3762             | 3762                |
| <i>Phascogale tapoatafa</i>        | Brush-tailed phascogale        | Dasyuromorphia   | 21                  | 0                     | ND                     | 0                  | 4470             | 4470                |
| <i>Phascolarctos cinereus</i>      | Koala                          | Diprotodontia    | 19                  | 0                     | ND                     | 0                  | 0935             | 0935                |
| <i>Phyllostomus discolor</i>       | Pale spear-nosed bat           | Chiroptera       | 15                  | 0                     | ND                     | 0                  | 3765             | 3765                |
| <i>Physeter catodon</i>            | Sperm whale                    | Cetacea          | 12                  | 0                     | -16.05                 | 0                  | 0956             | 0956                |
| <i>Pithecia irrorata</i>           | Rio Tapajós saki               | Primates         | 9                   | 0                     | -6.48                  | 0                  | 1411             | 1411                |
| <i>Platanista gangetica</i>        | South Asian river dolphin      | Cetacea          | 13                  | 0                     | -14.99                 | 0                  | 3168             | 3168                |
| <i>Plecotus auritus</i>            | Lump-nosed bat                 | Chiroptera       | 17                  | 0                     | -3.01                  | 0                  | 0114             | 0114                |
| <i>Pontoporia blainvillei</i>      | La Plata dolphin               | Cetacea          | 13                  | 0                     | -13.69                 | 0                  | 3311             | 3311                |
| <i>Potorous gilbertii</i>          | Gilbert's potoroo              | Diprotodontia    | 18                  | 0                     | ND                     | 0                  | 3958             | 3958                |
| <i>Procapra capensis</i>           | Rock hyrax                     | Hyracoidea       | 14                  | 0                     | ND                     | 0                  | 0952             | 0952                |
| <i>Pteronotus parnellii</i>        | Parnell's mustached bat        | Chiroptera       | 17                  | 0                     | ND                     | 0                  | 3097             | 3097                |
| <i>Pusa hispida saimensis</i>      | Ringed seal                    | Carnivora        | 13                  | 0                     | -14.83                 | 0                  | 4786             | 4786                |
| <i>Redunca redunca</i>             | Bohor reedbeek                 | Artiodactyla     | 10                  | 0                     | -14.8                  | 0                  | 3319             | 3319                |
| <i>Rhinolophus ferrumequinum</i>   | Greater horseshoe bat          | Chiroptera       | 13                  | 0                     | -6.69                  | 0                  | 2030             | 2030                |
| <i>Saimiri sciureus</i>            | Squirrel monkey                | Primates         | 10                  | 0                     | -5.63                  | 0                  | 0362             | 0362                |
| <i>Sarcophilus harrisii</i>        | Tasmanian devil                | Dasyuromorphia   | 22                  | 0                     | ND                     | 0                  | 0970             | 0970                |
| <i>Scalopus aquaticus</i>          | Eastern mole                   | Soricomorpha     | 15                  | 0                     | -8.06                  | 0                  | 3142             | 3142                |
| <i>Setonix brachyurus</i>          | Quokka                         | Diprotodontia    | 20                  | 0                     | ND                     | 0                  | 3862             | 3862                |
| <i>Sorex cinereus</i>              | Cinereous shrew                | Soricomorpha     | 16                  | 0                     | -4.11                  | 0                  | 1352             | 1352                |

| BINOMIAL NAME                        | COMMON NAME                     | ORDER        | AA No. <sup>a</sup> | Conf No. <sup>b</sup> | Stability <sup>c</sup> | Score <sup>d</sup> | PDB <sup>e</sup> | PrPdex <sup>f</sup> |
|--------------------------------------|---------------------------------|--------------|---------------------|-----------------------|------------------------|--------------------|------------------|---------------------|
| <i>Sorex palustris</i>               | American water shrew            | Soricomorpha | 16                  | 0                     | -9.15                  | 0                  | 4817             | 4817                |
| <i>Spermophilus parryii</i>          | Arctic ground squirrel          | Rodentia     | 18                  | 0                     | ND                     | 0                  | 1119             | 1119                |
| <i>Spermophilus tridecemlineatus</i> | Thirteen-lined ground squirrel  | Rodentia     | 17                  | 0                     | ND                     | 0                  | 1106             | 1106                |
| <i>Sturnira ludovici hondurensis</i> | Honduran yellow-shouldered bat  | Chiroptera   | 15                  | 0                     | ND                     | 0                  | 3126             | 3126                |
| <i>Sylvilagus transitionalis</i>     | New England cottontail          | Lagomorpha   | 13                  | 0                     | -18.5                  | 0                  | 4742             | 4742                |
| <i>Tachyglossus aculeatus</i>        | Short-beaked echidna            | Monotremata  | 24                  | 0                     | ND                     | 0                  | 3077             | 3077                |
| <i>Tamias sibiricus</i>              | Siberian chipmunk               | Rodentia     | 15                  | 0                     | -11.42                 | 0                  | 4618             | 4618                |
| <i>Tenrec ecaudatus</i>              | Tailless tenrec                 | Afrosoricida | 17                  | 0                     | ND                     | 0                  | 1347             | 1347                |
| <i>Tolypeutes matacus</i>            | Southern three-banded armadillo | Cingulata    | 21                  | 0                     | -8.09                  | 0                  | 3163             | 3163                |
| <i>Tonatia saurophila</i>            | Stripe-headed round-eared bat   | Chiroptera   | 15                  | 0                     | ND                     | 0                  | 3164             | 3164                |
| <i>Trachops cirrhosus</i>            | Fringe-lipped bat               | Chiroptera   | 13                  | 0                     | -13.99                 | 0                  | 4512             | 4512                |
| <i>Tragelaphus buxtoni</i>           | Mountain nyala                  | Artiodactyla | 15                  | 0                     | -13.61                 | 0                  | 3241             | 3241                |
| <i>Tursiops truncatus</i>            | Common bottlenose dolphin       | Cetacea      | 13                  | 0                     | -19.79                 | 0                  | 0409             | 0409                |
| <i>Uropsilus gracilis</i>            | Gracile shrew mole              | Soricomorpha | 9                   | 0                     | -5.6                   | 0                  | 3144             | 3144                |
| <i>Ziphius cavirostris</i>           | Ziphius                         | Cetacea      | 14                  | 0                     | -21.45                 | 0                  | 0961             | 0961                |

This table provides a comprehensive list of the 382 species analyzed in the study, along with their corresponding misfolding scores. The species are arranged in descending order of misfolding proneness scores, ranging from 100 to 0. In cases where species share the same score, they are further organized alphabetically based on their binomial names. Readers can access detailed information about each protein by clicking on certain data (PDB and PrPdex). These codes link to various valuable pieces of information collected in this study, all integrated into the PrPdex database (<https://prpdex.com>).

<sup>a</sup> Number of amino acids differing from the bank vole PrP

<sup>b</sup> Number of distinct biochemical conformers observed.

<sup>c</sup> Predicted stability of the globular counterpart

<sup>d</sup> Misfolding proneness score

<sup>e</sup> PDB code to access to a specific URL displaying the PDB details within the AlphaFold predicted structure.

<sup>f</sup> PrPdex code to access to a specific URL containing a comprehensive file that encompasses all data obtained in this study for each protein.

**Supplementary table 3. List of 29 mammal species whose prion proteins' infectivity is being tested either *in vitro* or *in vivo*.**

| ORDER           | COMMON NAME               | BINOMIAL NAME                    | IN VITRO PROPAGATION |                         | IN VIVO INFECTIVITY |                            |
|-----------------|---------------------------|----------------------------------|----------------------|-------------------------|---------------------|----------------------------|
|                 |                           |                                  | In TgVole 1X         | In homologous substrate | In TgVole 1X        | In homologous substrate    |
| Artiodactyla    | Cow                       | <i>Bos taurus</i>                | Propagate            | Ongoing                 | Infectious          | Not tested                 |
|                 | Elk                       | <i>Cervus elaphus canadensis</i> | Propagate            | Propagate               | Infectious          | Ongoing (TgElk)            |
|                 | Mule deer                 | <i>Odocoileus hemionus</i>       | Propagate            | Propagate               | Infectious          | Ongoing (TgMule Deer)      |
|                 | Sheep                     | <i>Ovis aries</i>                | Propagate            | Propagate               | Infectious          | Infectious (Tg338)         |
|                 | Pig                       | <i>Sus scrofa</i>                | Propagate            | Ongoing                 | Infectious          | Not tested                 |
| Carnivora       | Dog                       | <i>Canis lupus familiaris</i>    | Propagate            | Ongoing                 | Infectious          | Ongoing (TgDog)            |
|                 | Cat                       | <i>Felis silvestris catus</i>    | Propagate            | Ongoing                 | Ongoing             | Not tested                 |
|                 | Skunk                     | <i>Mephitis mephitis</i>         | Ongoing              | Ongoing                 | Ongoing             | Not tested                 |
|                 | Ferret                    | <i>Mustela putorius</i>          | Propagate            | Ongoing                 | Ongoing             | Not tested                 |
|                 | American mink             | <i>Neovison vison</i>            | Propagate            | Ongoing                 | Infectious          | Not tested                 |
| Chiroptera      | Egyptian fruit bat        | <i>Rousettus aegyptiacus</i>     | Propagate            | Ongoing                 | Infectious          | Not tested                 |
| Dasyuromorphia  | Thylacine                 | <i>Thylacinus cynocephalus</i>   | Ongoing              | Not tested              | Ongoing             | Not tested                 |
| Dermoptera      | Sunda flying lemur        | <i>Galeopterus variegatus</i>    | No propagation       | Not tested              | Ongoing             | Not tested                 |
| Didelphimorphia | Agile gracile opossum     | <i>Gracilinanus agilis</i>       | Ongoing              | Not tested              | Ongoing             | Not tested                 |
|                 | Opossum                   | <i>Monodelphis domestica</i>     | No propagation       | Not tested              | Non infectious      | Not tested                 |
| Diprotodontia   | Western pygmy possum      | <i>Cercartetus concinnus</i>     | Propagate            | Not tested              | Infectious          | Not tested                 |
| Lagomorpha      | Rabbit                    | <i>Oryctolagus cuniculus</i>     | Propagate            | Ongoing                 | Infectious          | Ongoing                    |
| Microbiotheria  | Colocolo opossum          | <i>Dromiciops gliroides</i>      | No propagation       | Not tested              | Ongoing             | Not tested                 |
| Perissodactyla  | Horse                     | <i>Equus caballus ferus</i>      | Propagate            | Ongoing                 | Ongoing             | Not tested                 |
| Pholidota       | Pangolin                  | <i>Manis javanica</i>            | Ongoing              | Not tested              | Ongoing             | Not tested                 |
| Primates        | Human                     | <i>Homo sapiens</i>              | Ongoing              | Ongoing                 | Infectious          | Ongoing                    |
|                 | Pigtail macaque           | <i>Macaca nemestrina</i>         | No propagation       | Not tested              | Ongoing             | Not tested                 |
| Rodentia        | Montane guinea pig        | <i>Cavia tschudii</i>            | Propagate            | Ongoing (in guinea pig) | Ongoing             | Not tested                 |
|                 | Long-tailed chinchilla    | <i>Chinchilla lanigera</i>       | Propagate            | Ongoing                 | Ongoing             | Not tested                 |
|                 | Mongolian gerbil          | <i>Meriones unguiculatus</i>     | Propagate            | Propagate               | Infectious          | Ongoing (mongolian gerbil) |
|                 | Bank vole                 | <i>Myodes glareolus</i>          | Propagate            | Propagate (in mouse)    | Infectious          | Infectious (mouse)         |
|                 | Russian hamster           | <i>Phodopus sungorus</i>         | Propagate            | Propagate               | Infectious          | Not tested                 |
|                 | Brown rat                 | <i>Rattus norvegicus</i>         | Propagate            | Propagate               | Infectious          | Not tested                 |
|                 | Unstriped ground squirrel | <i>Xerus rutilus</i>             | Propagate            | Not tested              | Ongoing             | Not tested                 |
