# Supplementary material for: A Protein Misfolding Shaking Amplification-based method for the spontaneous generation of hundreds of bona fide prions
Source: Springer Nature journal article supplement (doi:10.1038/s41467-024-46360-2), 2024-03-08
Supplement: 41467_2024_46360_MOESM4_ESM.pdf [file 41467_2024_46360_MOESM4_ESM.pdf]

### **Supplementary Data 1**

Individual files accessible also in the PrPdex webpage summarizing the results for each of the 382 prion proteins analyzed in PMSA.
